# Supplementary material
Source: HighWire-hosted journal article supplement (https://jitc.bmj.com/content/10/5/e003733)
Supplement: inline-supplementary-material-4 [file inline-supplementary-material-4.xlsx]

## Sheet: Patient 1
Supplementary Table S3. Identified tryptic peptides of the 80% ACN fraction from the HLA immunopeptidome purification from pleural fluids. The data for each patient is in a separate tab. Sequences were converted to log2. HLA heavy chanes are marked for each patient in yellow.
Protein names	Gene names	Fasta headers	Intensity P1_interactome	iBAQ	iBAQ P1_interactome	Unique peptides P1_interactome	Peptides	Razor + unique peptides	Unique peptides	Sequence coverage [%]	Unique + razor sequence coverage [%]	Unique sequence coverage [%]	Mol. weight [kDa]	Q-value	Score	Intensity	MS/MS count	Sequence lengths	Sequence length	Number of proteins	Peptide counts (all)	Peptide counts (razor+unique)	Peptide counts (unique)	Sequence coverage P1_interactome [%]	Protein IDs	Majority protein IDs	Peptides P1_interactome	Razor + unique peptides P1_interactome	Peptide is razor
Apolipoprotein C-II;Proapolipoprotein C-II	APOC2;APOC4-APOC2	tr|Q6P163|Q6P163_HUMAN APOC2 protein OS=Homo sapiens OX=9606 GN=APOC2 PE=1 SV=1;tr|A0A024R0T9|A0A024R0T9_HUMAN Apolipoprotein C-II isoform 1 OS=Homo sapiens OX=9606 GN=APOC4-APOC2 PE=1 SV=1;tr|K7ER74|K7ER74_HUMAN APOC4-APOC2 readthrough (NMD candidate) OS=	25.1659	23.581	23.581	1	1	1	1	12.5	12.5	12.5	8.1463	0.0088106	5.8099	37645000	1		72	4				12.5	Q6P163;A0A024R0T9;K7ER74;P02655	Q6P163;A0A024R0T9;K7ER74;P02655	1	1	TRUE
	SERPINA1	tr|A0A024R6I7|A0A024R6I7_HUMAN Alpha-1-antitrypsin OS=Homo sapiens OX=9606 GN=SERPINA1 PE=1 SV=1;tr|A0A0G2JRN3|A0A0G2JRN3_HUMAN Alpha-1-antitrypsin OS=Homo sapiens OX=9606 GN=SERPINA1 PE=1 SV=1	29.5919	25.0683	25.0683	3	34	3	3	67.7	6.2	6.2	46.708	0	159.94	809170000	12		418	9				67.7	A0A024R6I7;A0A0G2JRN3;G3V2B9;G3V544;G3V5R8;G3V387;A0A0B4J278;A0A0G2JPK4;P20848	A0A024R6I7;A0A0G2JRN3	34	3	False;False;True;False;False;False;False;False;True;False;False;False;False;False;False;False;False;False;False;False;False;False;False;False;False;False;False;False;False;False;False;False;False;True
	IGLV4-69	sp|A0A075B6H9|LV469_HUMAN Immunoglobulin lambda variable 4-69 OS=Homo sapiens OX=9606 GN=IGLV4-69 PE=1 SV=1	29.1021	26.7802	26.7802	5	5	5	5	43.7	43.7	43.7	12.773	0	36.003	576230000	12	119	119	1	5	5	5	43.7	A0A075B6H9	A0A075B6H9	5	5	True;True;True;True;True
	IGLV8-61	sp|A0A075B6I0|LV861_HUMAN Immunoglobulin lambda variable 8-61 OS=Homo sapiens OX=9606 GN=IGLV8-61 PE=3 SV=7	24.108	22.1081	22.1081	1	1	1	1	13.1	13.1	13.1	12.814	0.10303	5.2618	18082000	1	122	122	1	1	1	1	13.1	A0A075B6I0	A0A075B6I0	1	1	TRUE
	IGLV4-60	sp|A0A075B6I1|LV460_HUMAN Immunoglobulin lambda variable 4-60 OS=Homo sapiens OX=9606 GN=IGLV4-60 PE=3 SV=1	25.1071	22.7852	22.7852	1	1	1	1	8.3	8.3	8.3	12.987	0.0046083	5.9942	36140000	2	120	120	1	1	1	1	8.3	A0A075B6I1	A0A075B6I1	1	1	TRUE
Ig lambda chain V region 4A	IGLV7-46	sp|A0A075B6I9|LV746_HUMAN Immunoglobulin lambda variable 7-46 OS=Homo sapiens OX=9606 GN=IGLV7-46 PE=3 SV=4;sp|P04211|LV743_HUMAN Immunoglobulin lambda variable 7-43 OS=Homo sapiens OX=9606 GN=IGLV7-43 PE=3 SV=2	28.6439	26.6439	26.6439	2	2	2	2	13.7	13.7	13.7	12.468	0	11.244	419450000	3		117	2				13.7	A0A075B6I9;P04211	A0A075B6I9;P04211	2	2	True;True
	IGLV5-37	sp|A0A075B6J1|LV537_HUMAN Immunoglobulin lambda variable 5-37 OS=Homo sapiens OX=9606 GN=IGLV5-37 PE=3 SV=1	24.4384	22.8535	22.8535	1	1	1	1	16.3	16.3	16.3	13.277	0.016878	5.6509	22735000	0	123	123	1	1	1	1	16.3	A0A075B6J1	A0A075B6J1	1	1	TRUE
	IGLV3-10	sp|A0A075B6K4|LV310_HUMAN Immunoglobulin lambda variable 3-10 OS=Homo sapiens OX=9606 GN=IGLV3-10 PE=3 SV=2	31.3471	29.3471	29.3471	5	7	7	5	35.7	35.7	35.7	12.441	0	51.005	2731600000	28	115	115	1	7	7	5	35.7	A0A075B6K4	A0A075B6K4	7	7	True;True;True;True;True;True;True
Ig lambda chain V-III region LOI	IGLV3-9	sp|A0A075B6K5|LV39_HUMAN Immunoglobulin lambda variable 3-9 OS=Homo sapiens OX=9606 GN=IGLV3-9 PE=3 SV=1;sp|P80748|LV321_HUMAN Immunoglobulin lambda variable 3-21 OS=Homo sapiens OX=9606 GN=IGLV3-21 PE=1 SV=2	32.7964	30.4744	30.4744	4	4	4	4	49.6	49.6	49.6	12.332	0	187.4	7459200000	23		115	3				49.6	A0A075B6K5;P80748;A0A075B6K2	A0A075B6K5;P80748	4	4	True;True;True;True
	IGKV2-24;IGKV2D-24	sp|A0A0C4DH68|KV224_HUMAN Immunoglobulin kappa variable 2-24 OS=Homo sapiens OX=9606 GN=IGKV2-24 PE=3 SV=1;tr|A0A075B6R9|A0A075B6R9_HUMAN Immunoglobulin kappa variable 2D-24 (non-functional) (Fragment) OS=Homo sapiens OX=9606 GN=IGKV2D-24 PE=1 SV=1	31.7173	29.7173	29.7173	3	4	4	3	38.3	38.3	38.3	13.079	0	123.28	3530700000	16		120	2				38.3	A0A0C4DH68;A0A075B6R9	A0A0C4DH68;A0A075B6R9	4	4	True;True;True;True
	IGKV2D-29;IGKV A18;IGKV2D-26	sp|A0A075B6S2|KVD29_HUMAN Immunoglobulin kappa variable 2D-29 OS=Homo sapiens OX=9606 GN=IGKV2D-29 PE=3 SV=1;sp|A2NJV5|KV229_HUMAN Immunoglobulin kappa variable 2-29 OS=Homo sapiens OX=9606 GN=IGKV2-29 PE=3 SV=2;sp|A0A0A0MRZ7|KVD26_HUMAN Immunoglobulin kap	28.3223	26.0004	26.0004	2	4	2	2	25.8	25.8	25.8	13.143	0	16.614	335640000	5		120	3				25.8	A0A075B6S2;A2NJV5;A0A0A0MRZ7	A0A075B6S2;A2NJV5;A0A0A0MRZ7	4	2	False;False;True;True
	IGKV1-27	sp|A0A075B6S5|KV127_HUMAN Immunoglobulin kappa variable 1-27 OS=Homo sapiens OX=9606 GN=IGKV1-27 PE=3 SV=1	29.009	26.687	26.687	2	3	2	2	53.8	40.2	40.2	12.711	0	59.613	540220000	11	117	117	1	3	2	2	53.8	A0A075B6S5	A0A075B6S5	3	2	True;True;False
	IGKV1D-37	tr|A0A075B6S9|A0A075B6S9_HUMAN Immunoglobulin kappa variable 1-37 (non-functional) (Fragment) OS=Homo sapiens OX=9606 GN=IGKV1-37 PE=1 SV=7	26.5826	24.2608	24.2608	1	1	1	1	13.7	13.7	13.7	12.688	0.020576	5.5839	100500000	1	117	117	1	1	1	1	13.7	A0A075B6S9	A0A075B6S9	1	1	TRUE
	IGHV3OR16-12	tr|A0A075B7B8|A0A075B7B8_HUMAN Immunoglobulin heavy variable 3/OR16-12 (non-functional) (Fragment) OS=Homo sapiens OX=9606 GN=IGHV3OR16-12 PE=1 SV=1	25.4048	22.5975	22.5975	2	3	2	2	18.8	18.8	18.8	12.874	0	10.828	44423000	1	117	117	1	3	2	2	18.8	A0A075B7B8	A0A075B7B8	3	2	False;True;True
	IGHV1OR15-1	tr|A0A075B7D0|A0A075B7D0_HUMAN Immunoglobulin heavy variable 1/OR15-1 (non-functional) (Fragment) OS=Homo sapiens OX=9606 GN=IGHV1OR15-1 PE=1 SV=1	26.2064	23.399	23.399	1	1	1	1	10.3	10.3	10.3	13.012	0	6.2049	77429000	1	117	117	1	1	1	1	10.3	A0A075B7D0	A0A075B7D0	1	1	TRUE
	IGHV3OR15-7	tr|A0A075B7D8|A0A075B7D8_HUMAN Immunoglobulin heavy variable 3/OR15-7 (pseudogene) (Fragment) OS=Homo sapiens OX=9606 GN=IGHV3OR15-7 PE=1 SV=1	27.353	24.5457	24.5457	1	3	1	1	21.8	9.2	9.2	13.08	0.0046512	6.0059	171430000	2	119	119	1	3	1	1	21.8	A0A075B7D8	A0A075B7D8	3	1	False;False;True
	IGHV3OR16-8	tr|A0A075B7F1|A0A075B7F1_HUMAN Immunoglobulin heavy variable 3/OR16-8 (non-functional) (Fragment) OS=Homo sapiens OX=9606 GN=IGHV3OR16-8 PE=1 SV=1	26.682	24.0971	24.0971	1	1	1	1	16.4	16.4	16.4	12.703	0.10169	5.3005	107670000	2	116	116	1	1	1	1	16.4	A0A075B7F1	A0A075B7F1	1	1	TRUE
	IGKV3D-15	sp|A0A087WSY6|KVD15_HUMAN Immunoglobulin kappa variable 3D-15 OS=Homo sapiens OX=9606 GN=IGKV3D-15 PE=3 SV=6	29.0072	27.4222	27.4222	1	2	2	1	26.1	26.1	7.8	12.534	0	33.259	539550000	6	115	115	1	2	2	1	26.1	A0A087WSY6	A0A087WSY6	2	2	True;True
	IGKV1D-8	tr|A0A0G2JQJ0|A0A0G2JQJ0_HUMAN Immunoglobulin kappa variable 1D-8 (Fragment) OS=Homo sapiens OX=9606 GN=IGKV1D-8 PE=1 SV=4;sp|A0A087WSZ0|KVD08_HUMAN Immunoglobulin kappa variable 1D-8 OS=Homo sapiens OX=9606 GN=IGKV1D-8 PE=3 SV=6	23.2935	21.2934	21.2934	1	1	1	1	16.2	16.2	16.2	12.865	0	8.2595	10281000	1		117	2				16.2	A0A0G2JQJ0;A0A087WSZ0	A0A0G2JQJ0;A0A087WSZ0	1	1	TRUE
Keratin-associated protein 10-9	KRTAP10-9	tr|A0A087WT19|A0A087WT19_HUMAN Keratin-associated protein 10-9 OS=Homo sapiens OX=9606 GN=KRTAP10-9 PE=4 SV=1;sp|P60411|KR109_HUMAN Keratin-associated protein 10-9 OS=Homo sapiens OX=9606 GN=KRTAP10-9 PE=1 SV=2	28.7889	28.7889	28.7889	1	1	1	1	4.2	4.2	4.2	19.72	0.074205	5.3517	463790000	2		192	2				4.2	A0A087WT19;P60411	A0A087WT19;P60411	1	1	TRUE
Dynein heavy chain 11, axonemal	DNAH11	tr|U3KQN2|U3KQN2_HUMAN Dynein heavy chain 11, axonemal (Fragment) OS=Homo sapiens OX=9606 GN=DNAH11 PE=4 SV=1;tr|A0A0C4DFR0|A0A0C4DFR0_HUMAN Dynein heavy chain 11, axonemal OS=Homo sapiens OX=9606 GN=DNAH11 PE=1 SV=1;tr|A0A087WYC6|A0A087WYC6_HUMAN Dynein h				1	1	1	1	6.9	6.9	6.9	19.891	0.0089686	5.9037	0	1		174	4				6.9	U3KQN2;A0A0C4DFR0;A0A087WYC6;Q96DT5	U3KQN2;A0A0C4DFR0;A0A087WYC6;Q96DT5	1	1	TRUE
Colipase	CLPS	tr|A0A087WZW1|A0A087WZW1_HUMAN Colipase OS=Homo sapiens OX=9606 GN=CLPS PE=1 SV=1;sp|P04118|COL_HUMAN Colipase OS=Homo sapiens OX=9606 GN=CLPS PE=1 SV=2	22.447	19.6397	19.6397	1	1	1	1	14.3	14.3	14.3	10.567	0.004717	6.0754	5717800	1		98	2				14.3	A0A087WZW1;P04118	A0A087WZW1;P04118	1	1	TRUE
Ig kappa chain V-II region Cum;Ig kappa chain V-II region FR	IGKV2-40;IGKV2D-28	tr|A0A087X0Q4|A0A087X0Q4_HUMAN Immunoglobulin kappa variable 2-40 OS=Homo sapiens OX=9606 GN=IGKV2-40 PE=1 SV=1;sp|A0A087WW87|KV240_HUMAN Immunoglobulin kappa variable 2-40 OS=Homo sapiens OX=9606 GN=IGKV2-40 PE=3 SV=2;sp|P01614|KVD40_HUMAN Immunoglobulin	32.417	30.417	30.417	3	4	4	3	56.7	56.7	56.7	11.434	0	94.642	5734400000	17		104	5				56.7	A0A087X0Q4;A0A087WW87;P01614;A0A075B6P5;P01615	A0A087X0Q4;A0A087WW87;P01614;A0A075B6P5;P01615	4	4	True;True;True;True
Complement C1s subcomponent;Complement C1s subcomponent heavy chain;Complement C1s subcomponent light chain	C1S	tr|A0A087X232|A0A087X232_HUMAN Complement C1s subcomponent OS=Homo sapiens OX=9606 GN=C1S PE=1 SV=1;sp|P09871|C1S_HUMAN Complement C1s subcomponent OS=Homo sapiens OX=9606 GN=C1S PE=1 SV=1;tr|B5MCV4|B5MCV4_HUMAN Complement C1s subcomponent (Fragment) OS=Ho	24.7272	19.9198	19.9198	3	3	3	3	6.2	6.2	6.2	75.905	0	18.726	27773000	3		682	8				6.2	A0A087X232;P09871;B5MCV4;H0Y5D1;C9JMA2;F8W876;F8WCZ6;P48740	A0A087X232;P09871;B5MCV4;H0Y5D1	3	3	True;True;True
Serum amyloid A-4 protein	SAA2-SAA4;SAA4	tr|A0A096LPE2|A0A096LPE2_HUMAN SAA2-SAA4 readthrough OS=Homo sapiens OX=9606 GN=SAA2-SAA4 PE=4 SV=1;sp|P35542|SAA4_HUMAN Serum amyloid A-4 protein OS=Homo sapiens OX=9606 GN=SAA4 PE=1 SV=2	31.0146	27.4297	27.4297	4	7	7	4	37	37	23.6	23.353	0	54.496	2169300000	18		208	5				37	A0A096LPE2;P35542;A0A3B3ISW8;E9PR14;G3V1D9	A0A096LPE2;P35542	7	7	True;True;True;True;True;True;True
E3 ubiquitin-protein ligase CHFR	CHFR	tr|A0A096P6K8|A0A096P6K8_HUMAN E3 ubiquitin-protein ligase CHFR OS=Homo sapiens OX=9606 GN=CHFR PE=1 SV=1;sp|Q96EP1|CHFR_HUMAN E3 ubiquitin-protein ligase CHFR OS=Homo sapiens OX=9606 GN=CHFR PE=1 SV=2				1	1	1	1	2.6	2.6	2.6	38.175	0.016667	5.6029	0	1		349	2				2.6	A0A096P6K8;Q96EP1	A0A096P6K8;Q96EP1	1	1	TRUE
Caspase-7;Caspase-7 subunit p20;Caspase-7 subunit p11	CASP7	tr|Q5SVL2|Q5SVL2_HUMAN Caspase-7 (Fragment) OS=Homo sapiens OX=9606 GN=CASP7 PE=1 SV=1;tr|A0A0A0MRL7|A0A0A0MRL7_HUMAN Caspase-7 OS=Homo sapiens OX=9606 GN=CASP7 PE=1 SV=1;sp|P55210|CASP7_HUMAN Caspase-7 OS=Homo sapiens OX=9606 GN=CASP7 PE=1 SV=1	30.249	26.4416	26.4416	1	1	1	1	3.2	3.2	3.2	24.79	0.10032	5.2835	1276000000	1		222	3				3.2	Q5SVL2;A0A0A0MRL7;P55210	Q5SVL2;A0A0A0MRL7;P55210	1	1	TRUE
Ig gamma-1 chain C region	IGHG1	sp|P01857|IGHG1_HUMAN Immunoglobulin heavy constant gamma 1 OS=Homo sapiens OX=9606 GN=IGHG1 PE=1 SV=1;tr|A0A0A0MS08|A0A0A0MS08_HUMAN Immunoglobulin heavy constant gamma 1 (Fragment) OS=Homo sapiens OX=9606 GN=IGHG1 PE=1 SV=1;tr|A0A0A0MS07|A0A0A0MS07_HUMAN	38.1223	34.2154	34.2154	14	25	25	14	74.8	74.8	48.2	36.105	0	323.31	299190000000	525		330	3				74.8	P01857;A0A0A0MS08;A0A0A0MS07	P01857;A0A0A0MS08;A0A0A0MS07	25	25	True;True;True;True;True;True;True;True;True;True;True;True;True;True;True;True;True;True;True;True;True;True;True;True;True
	IGHV3-49	sp|A0A0A0MS15|HV349_HUMAN Immunoglobulin heavy variable 3-49 OS=Homo sapiens OX=9606 GN=IGHV3-49 PE=3 SV=1	28.8377	26.0303	26.0303	5	6	5	5	52.9	45.4	45.4	13.056	0	34.987	479740000	11	119	119	1	6	5	5	52.9	A0A0A0MS15	A0A0A0MS15	6	5	True;False;True;True;True;True
Complement C1q subcomponent subunit B	C1QB	tr|A0A0A0MSV6|A0A0A0MSV6_HUMAN Complement C1q subcomponent subunit B (Fragment) OS=Homo sapiens OX=9606 GN=C1QB PE=1 SV=6;tr|D6R934|D6R934_HUMAN Complement C1q subcomponent subunit B OS=Homo sapiens OX=9606 GN=C1QB PE=1 SV=1;sp|P02746|C1QB_HUMAN Complement	27.311	23.8517	23.8517	5	5	5	5	25	25	25	24.03	0	48.334	166510000	7		228	3				25	A0A0A0MSV6;D6R934;P02746	A0A0A0MSV6;D6R934;P02746	5	5	True;True;True;True;True
Sodium/potassium-transporting ATPase subunit alpha-3;Sodium/potassium-transporting ATPase subunit alpha-2;Sodium/potassium-transporting ATPase subunit alpha-1;Sodium/potassium-transporting ATPase subunit alpha-4;Potassium-transporting ATPase alpha chain 2	ATP1A2;ATP1A3;ATP1A1;ATP1A4;ATP12A	tr|H0Y7C1|H0Y7C1_HUMAN Sodium/potassium-transporting ATPase subunit alpha (Fragment) OS=Homo sapiens OX=9606 GN=ATP1A2 PE=1 SV=1;tr|M0R116|M0R116_HUMAN Sodium/potassium-transporting ATPase subunit alpha OS=Homo sapiens OX=9606 GN=ATP1A3 PE=1 SV=1;tr|B1AKY9	25.2271	20.0979	20.0979	1	1	1	1	1.3	1.3	1.3	78.796	0.083333	5.3258	39276000	2		714	10				1.3	H0Y7C1;M0R116;B1AKY9;A0A2R8YEY8;A0A0A0MT26;P13637;P50993;P05023;Q13733;P54707	H0Y7C1;M0R116;B1AKY9;A0A2R8YEY8;A0A0A0MT26;P13637;P50993;P05023;Q13733;P54707	1	1	TRUE
	IGKV6D-21;IGKV6D-41	sp|A0A0A0MT36|KVD21_HUMAN Immunoglobulin kappa variable 6D-21 OS=Homo sapiens OX=9606 GN=IGKV6D-21 PE=3 SV=1;tr|A0A0C4DH26|A0A0C4DH26_HUMAN Immunoglobulin kappa variable 6D-41 (non-functional) (Fragment) OS=Homo sapiens OX=9606 GN=IGKV6D-41 PE=4 SV=1	23.1317	21.1317	21.1317	1	1	1	1	10.5	10.5	10.5	12.34	0	7.7501	9190400	1		114	2				10.5	A0A0A0MT36;A0A0C4DH26	A0A0A0MT36;A0A0C4DH26	1	1	TRUE
	IGLV1-36	sp|A0A0B4J1U3|LV136_HUMAN Immunoglobulin lambda variable 1-36 OS=Homo sapiens OX=9606 GN=IGLV1-36 PE=1 SV=5	31.2498	30.2499	30.2499	4	4	4	4	42.7	42.7	42.7	12.478	0	323.31	2553500000	28	117	117	1	4	4	4	42.7	A0A0B4J1U3	A0A0B4J1U3	4	4	True;True;True;True
	IGHV6-1	sp|A0A0B4J1U7|HV601_HUMAN Immunoglobulin heavy variable 6-1 OS=Homo sapiens OX=9606 GN=IGHV6-1 PE=3 SV=1	28.3392	26.3392	26.3392	1	1	1	1	5.8	5.8	5.8	13.481	0.070922	5.3581	339590000	3	121	121	1	1	1	1	5.8	A0A0B4J1U7	A0A0B4J1U7	1	1	TRUE
	IGHV3-15	sp|A0A0B4J1V0|HV315_HUMAN Immunoglobulin heavy variable 3-15 OS=Homo sapiens OX=9606 GN=IGHV3-15 PE=3 SV=1	31.0039	28.1965	28.1965	6	8	8	6	52.9	52.9	42.9	12.926	0	148.61	2153300000	28		119	2				52.9	A0A0B4J1V0;A0A0B4J1V6	A0A0B4J1V0	8	8	True;True;True;True;True;True;True;True
Ig heavy chain V-III region TRO	IGHV3-21	sp|A0A0B4J1V1|HV321_HUMAN Immunoglobulin heavy variable 3-21 OS=Homo sapiens OX=9606 GN=IGHV3-21 PE=1 SV=1;sp|P01762|HV311_HUMAN Immunoglobulin heavy variable 3-11 OS=Homo sapiens OX=9606 GN=IGHV3-11 PE=1 SV=2	26.2038	24.2037	24.2037	1	3	1	1	35	16.2	16.2	12.839	0	100.4	77289000	9		117	2				35	A0A0B4J1V1;P01762	A0A0B4J1V1;P01762	3	1	False;True;False
	IGHV3-74;IGHV3OR16-13	sp|A0A0B4J1X5|HV374_HUMAN Immunoglobulin heavy variable 3-74 OS=Homo sapiens OX=9606 GN=IGHV3-74 PE=3 SV=1;tr|A0A075B7E8|A0A075B7E8_HUMAN Immunoglobulin heavy variable 3/OR16-13 (non-functional) (Fragment) OS=Homo sapiens OX=9606 GN=IGHV3OR16-13 PE=1 SV=1	29.7915	26.9841	26.9841	4	7	4	4	57.3	47.9	47.9	12.839	0	50.926	929250000	10		117	3				57.3	A0A0B4J1X5;A0A075B7E8;A0A0J9YVY3	A0A0B4J1X5;A0A075B7E8	7	4	False;True;True;True;True;False;False
	IGHV3-43	sp|A0A0B4J1X8|HV343_HUMAN Immunoglobulin heavy variable 3-43 OS=Homo sapiens OX=9606 GN=IGHV3-43 PE=3 SV=1	31.0633	28.4783	28.4783	2	5	2	2	42.4	25.4	25.4	13.077	0	48.531	2243800000	8	118	118	1	5	2	2	42.4	A0A0B4J1X8	A0A0B4J1X8	5	2	False;False;True;False;True
	IGHV3-72	sp|A0A0B4J1Y9|HV372_HUMAN Immunoglobulin heavy variable 3-72 OS=Homo sapiens OX=9606 GN=IGHV3-72 PE=3 SV=1	28.9731	26.6512	26.6512	3	7	5	3	60.5	47.1	34.5	13.203	0	67.769	526960000	22	119	119	1	7	5	3	60.5	A0A0B4J1Y9	A0A0B4J1Y9	7	5	True;False;False;True;True;True;True
Immunoglobulin lambda-like polypeptide 5;Ig lambda-1 chain C regions	IGLL5;IGLC1	tr|A0A0B4J231|A0A0B4J231_HUMAN Immunoglobulin lambda-like polypeptide 5 OS=Homo sapiens OX=9606 GN=IGLL5 PE=1 SV=1;sp|B9A064|IGLL5_HUMAN Immunoglobulin lambda-like polypeptide 5 OS=Homo sapiens OX=9606 GN=IGLL5 PE=2 SV=2;sp|P0CG04|IGLC1_HUMAN Immunoglobuli	33.9108	30.4514	30.4514	5	13	5	5	47.9	19.5	19.5	23.15	0	53.151	16150000000	53		215	3				47.9	A0A0B4J231;B9A064;P0CG04	A0A0B4J231;B9A064;P0CG04	13	5	True;True;True;False;False;False;False;False;False;True;True;False;False
	IGHV3OR16-9	tr|A0A0B4J2B5|A0A0B4J2B5_HUMAN Immunoglobulin heavy variable 3/OR16-9 (non-functional) (Fragment) OS=Homo sapiens OX=9606 GN=IGHV3OR16-9 PE=1 SV=1;tr|S4R460|S4R460_HUMAN Immunoglobulin heavy variable 3/OR16-9 (non-functional) OS=Homo sapiens OX=9606 GN=IGH	33.4559	31.1339	31.1339	1	3	2	1	41.8	30.6	19.4	10.657	0	148.37	11782000000	19		98	2				41.8	A0A0B4J2B5;S4R460	A0A0B4J2B5;S4R460	3	2	True;True;False
Ig heavy chain V-I region HG3;Ig heavy chain V-I region EU	IGHV1-3;IGHV1-69-2	sp|P0DP01|HV108_HUMAN Immunoglobulin heavy variable 1-8 OS=Homo sapiens OX=9606 GN=IGHV1-8 PE=3 SV=1;sp|A0A0C4DH29|HV103_HUMAN Immunoglobulin heavy variable 1-3 OS=Homo sapiens OX=9606 GN=IGHV1-3 PE=3 SV=1;sp|A0A0B4J2H0|HV69D_HUMAN Immunoglobulin heavy var	27.4207	24.8358	24.8358	1	1	1	1	9.4	9.4	9.4	12.992	0	25.062	179660000	4		117	5				9.4	P0DP01;A0A0C4DH29;A0A0B4J2H0;P01743;P01742	P0DP01;A0A0C4DH29;A0A0B4J2H0;P01743;P01742	1	1	TRUE
Collagen alpha-2(XI) chain	COL11A2	tr|A0A140T9I7|A0A140T9I7_HUMAN Collagen alpha-2(XI) chain (Fragment) OS=Homo sapiens OX=9606 GN=COL11A2 PE=1 SV=1;tr|H0YIS1|H0YIS1_HUMAN Collagen alpha-2(XI) chain OS=Homo sapiens OX=9606 GN=COL11A2 PE=1 SV=1;tr|A0A140TA54|A0A140TA54_HUMAN Collagen alpha-2	25.393	19.0355	19.0355	1	1	1	1	1.5	1.5	1.5	159.17	0.082759	5.3229	44062000	0		1623	9				1.5	A0A140T9I7;H0YIS1;A0A140TA54;Q4VXY6;A0A140T9N1;A0A140TA43;A0A0G2JL35;A0A0C4DFS1;P13942	A0A140T9I7;H0YIS1;A0A140TA54;Q4VXY6;A0A140T9N1;A0A140TA43;A0A0G2JL35;A0A0C4DFS1;P13942	1	1	TRUE
DNA (cytosine-5)-methyltransferase 3A	DNMT3A	tr|A0A0C4DG02|A0A0C4DG02_HUMAN DNA (cytosine-5)-methyltransferase 3A OS=Homo sapiens OX=9606 GN=DNMT3A PE=1 SV=1;tr|F8WE91|F8WE91_HUMAN DNA (cytosine-5)-methyltransferase 3A OS=Homo sapiens OX=9606 GN=DNMT3A PE=1 SV=1;sp|Q9Y6K1|DNM3A_HUMAN DNA (cytosine-5)	24.999	19.6771	19.6771	1	1	1	1	4.2	4.2	4.2	77.816	0.10526	5.2676	33532000	0		689	3				4.2	A0A0C4DG02;F8WE91;Q9Y6K1	A0A0C4DG02;F8WE91;Q9Y6K1	1	1	TRUE
Actin-binding LIM protein 3	ABLIM3	tr|D6RHE7|D6RHE7_HUMAN Actin-binding LIM protein 3 OS=Homo sapiens OX=9606 GN=ABLIM3 PE=1 SV=1;tr|A0A0C4DGA7|A0A0C4DGA7_HUMAN Actin-binding LIM protein 3 OS=Homo sapiens OX=9606 GN=ABLIM3 PE=1 SV=1;sp|O94929|ABLM3_HUMAN Actin-binding LIM protein 3 OS=Homo	26.5999	23.7925	23.7925	1	1	1	1	9.9	9.9	9.9	16.907	0.068592	5.3682	101710000	1		151	3				9.9	D6RHE7;A0A0C4DGA7;O94929	D6RHE7;A0A0C4DGA7;O94929	1	1	TRUE
	IGKV3D-20	sp|A0A0C4DH25|KVD20_HUMAN Immunoglobulin kappa variable 3D-20 OS=Homo sapiens OX=9606 GN=IGKV3D-20 PE=3 SV=1	28.9522	26.6302	26.6302	1	4	1	1	27.6	7.8	7.8	12.515	0.1	5.2829	519370000	1	116	116	1	4	1	1	27.6	A0A0C4DH25	A0A0C4DH25	4	1	False;False;False;True
	IGHV3-16	tr|A0A0C4DH30|A0A0C4DH30_HUMAN Immunoglobulin heavy variable 3-16 (non-functional) (Fragment) OS=Homo sapiens OX=9606 GN=IGHV3-16 PE=1 SV=1	27.2829	24.4756	24.4756	1	1	1	1	9.4	9.4	9.4	13.07	0	7.7667	163300000	3	117	117	1	1	1	1	9.4	A0A0C4DH30	A0A0C4DH30	1	1	TRUE
	IGHV3-20;IGHV3OR16-10	sp|A0A0C4DH32|HV320_HUMAN Immunoglobulin heavy variable 3-20 OS=Homo sapiens OX=9606 GN=IGHV3-20 PE=3 SV=2;tr|A0A075B7F0|A0A075B7F0_HUMAN Immunoglobulin heavy variable 3/OR16-10 (non-functional) (Fragment) OS=Homo sapiens OX=9606 GN=IGHV3OR16-10 PE=1 SV=1	28.4357	25.8507	25.8507	1	2	1	1	18.8	9.4	9.4	12.673	0	79.721	363070000	6		117	2				18.8	A0A0C4DH32;A0A075B7F0	A0A0C4DH32;A0A075B7F0	2	1	True;False
	IGHV4-28	sp|A0A0C4DH34|HV428_HUMAN Immunoglobulin heavy variable 4-28 OS=Homo sapiens OX=9606 GN=IGHV4-28 PE=3 SV=1	24.6717	22.6717	22.6717	2	2	2	2	9.4	9.4	9.4	13.124	0	11.56	26725000	2	117	117	1	2	2	2	9.4	A0A0C4DH34	A0A0C4DH34	2	2	True;True
	IGHV3-35	tr|A0A0C4DH35|A0A0C4DH35_HUMAN Immunoglobulin heavy variable 3-35 (non-functional) (Fragment) OS=Homo sapiens OX=9606 GN=IGHV3-35 PE=1 SV=1	27.2122	24.4048	24.4048	2	2	2	2	16.2	16.2	16.2	12.81	0	22.006	155480000	5	117	117	1	2	2	2	16.2	A0A0C4DH35	A0A0C4DH35	2	2	True;True
	IGHV3-38	tr|A0A0C4DH36|A0A0C4DH36_HUMAN Immunoglobulin heavy variable 3-38 (non-functional) (Fragment) OS=Homo sapiens OX=9606 GN=IGHV3-38 PE=1 SV=1	26.9191	24.3342	24.3342	1	2	1	1	17.2	9.5	9.5	12.758	0	30.502	126900000	2	116	116	1	2	1	1	17.2	A0A0C4DH36	A0A0C4DH36	2	1	False;True
	IGHV5-51	sp|A0A0C4DH38|HV551_HUMAN Immunoglobulin heavy variable 5-51 OS=Homo sapiens OX=9606 GN=IGHV5-51 PE=3 SV=1;sp|A0A0J9YXX1|HV5X1_HUMAN Immunoglobulin heavy variable 5-10-1 OS=Homo sapiens OX=9606 GN=IGHV5-10-1 PE=3 SV=1	27.943	25.3581	25.3581	4	4	4	4	47	47	47	12.674	0	35.917	258040000	13		117	2				47	A0A0C4DH38;A0A0J9YXX1	A0A0C4DH38;A0A0J9YXX1	4	4	True;True;True;True
	IGKV1-8;IGKV1-9	sp|A0A0C4DH67|KV108_HUMAN Immunoglobulin kappa variable 1-8 OS=Homo sapiens OX=9606 GN=IGKV1-8 PE=3 SV=1;sp|A0A0C4DH69|KV109_HUMAN Immunoglobulin kappa variable 1-9 OS=Homo sapiens OX=9606 GN=IGKV1-9 PE=3 SV=1	30.1855	28.1856	28.1856	3	4	4	3	47.8	47.8	33.9	12.537	0	89.892	1221100000	21		115	2				47.8	A0A0C4DH67;A0A0C4DH69	A0A0C4DH67;A0A0C4DH69	4	4	True;True;True;True
	IGKV1-6	sp|A0A0C4DH72|KV106_HUMAN Immunoglobulin kappa variable 1-6 OS=Homo sapiens OX=9606 GN=IGKV1-6 PE=3 SV=1	30.2873	28.2873	28.2873	0	3	1	0	26.5	13.7	0	12.697	0	53.581	1310300000	18		117	3				26.5	A0A0C4DH72;P04432;P01597	A0A0C4DH72	3	1	True;False;False
Ig kappa chain V-I region Wes	IGKV1-12	sp|A0A0C4DH73|KV112_HUMAN Immunoglobulin kappa variable 1-12 OS=Homo sapiens OX=9606 GN=IGKV1-12 PE=3 SV=1;sp|P01611|KVD12_HUMAN Immunoglobulin kappa variable 1D-12 OS=Homo sapiens OX=9606 GN=IGKV1D-12 PE=1 SV=2	27.5189	25.5189	25.5189	1	2	1	1	29.1	15.4	15.4	12.645	0	8.0419	192310000	2		117	2				29.1	A0A0C4DH73;P01611	A0A0C4DH73;P01611	2	1	True;False
Coiled-coil alpha-helical rod protein 1	CCHCR1	tr|A0A0G2JHL6|A0A0G2JHL6_HUMAN Coiled-coil alpha-helical rod protein 1 (Fragment) OS=Homo sapiens OX=9606 GN=CCHCR1 PE=1 SV=1;tr|A0A0G2JHL3|A0A0G2JHL3_HUMAN Coiled-coil alpha-helical rod protein 1 (Fragment) OS=Homo sapiens OX=9606 GN=CCHCR1 PE=1 SV=1;tr|A	26.2369	22.5364	22.5364	1	1	1	1	3.5	3.5	3.5	28.866	0.061303	5.4359	79085000	1		256	9				3.5	A0A0G2JHL6;A0A0G2JHL3;A2ABH1;A0A0G2JJ47;A0A0G2JII5;B0S7V6;A0A0G2JPU2;A0A0G2JP87;Q8TD31	A0A0G2JHL6;A0A0G2JHL3;A2ABH1;A0A0G2JJ47;A0A0G2JII5;B0S7V6;A0A0G2JPU2;A0A0G2JP87;Q8TD31	1	1	TRUE
Complement C2;Complement C2b fragment;Complement C2a fragment	C2	tr|A0A0G2JIE7|A0A0G2JIE7_HUMAN Complement C2 OS=Homo sapiens OX=9606 GN=C2 PE=1 SV=1;tr|H0Y3H6|H0Y3H6_HUMAN Complement C2 (Fragment) OS=Homo sapiens OX=9606 GN=C2 PE=1 SV=1;tr|A0A0G2JL69|A0A0G2JL69_HUMAN Complement C2 OS=Homo sapiens OX=9606 GN=C2 PE=1 SV=	27.2867	22.3325	22.3325	2	11	2	2	23.2	3.8	3.8	58.788	0	23.395	163730000	4		525	5				23.2	A0A0G2JIE7;H0Y3H6;A0A0G2JL69;P06681;B4DQI1	A0A0G2JIE7;H0Y3H6;A0A0G2JL69;P06681;B4DQI1	11	2	False;True;False;False;False;False;False;False;False;True;False
Ig alpha-2 chain C region	IGHA2	tr|A0A0G2JMB2|A0A0G2JMB2_HUMAN Immunoglobulin heavy constant alpha 2 (Fragment) OS=Homo sapiens OX=9606 GN=IGHA2 PE=1 SV=1;tr|A0A286YEY5|A0A286YEY5_HUMAN Immunoglobulin heavy constant alpha 2 (Fragment) OS=Homo sapiens OX=9606 GN=IGHA2 PE=1 SV=1;sp|P01877|	31.1021	27.2947	27.2947	4	17	4	4	73.2	30.9	30.9	36.508	0	193.45	2304900000	26		340	3				73.2	A0A0G2JMB2;A0A286YEY5;P01877	A0A0G2JMB2;A0A286YEY5;P01877	17	4	True;True;False;False;False;True;False;False;True;False;False;False;False;False;False;False;False
		tr|A0A0G2JRQ6|A0A0G2JRQ6_HUMAN Uncharacterized protein (Fragment) OS=Homo sapiens OX=9606 PE=1 SV=4	27.9835	25.6616	25.6616	2	2	2	2	22.2	22.2	22.2	12.748	0	18.927	265390000	3	117	117	1	2	2	2	22.2	A0A0G2JRQ6	A0A0G2JRQ6	2	2	True;True
		sp|A0A0J9YX35|HV64D_HUMAN Immunoglobulin heavy variable 3-64D OS=Homo sapiens OX=9606 GN=IGHV3-64D PE=3 SV=1	25.126	22.541	22.541	1	3	1	1	26.5	9.4	9.4	12.822	0.05814	5.4546	36616000	1	117	117	1	3	1	1	26.5	A0A0J9YX35	A0A0J9YX35	3	1	False;False;True
Ig heavy chain V-III region CAM		tr|A0A0J9YY99|A0A0J9YY99_HUMAN Uncharacterized protein (Fragment) OS=Homo sapiens OX=9606 PE=1 SV=1;sp|P0DP03|HV335_HUMAN Immunoglobulin heavy variable 3-30-5 OS=Homo sapiens OX=9606 GN=IGHV3-30-5 PE=3 SV=1;sp|P01768|HV330_HUMAN Immunoglobulin heavy variab	25.2492	22.4418	22.4418	1	7	1	1	50.4	7.7	7.7	12.965	0	6.1837	39880000	2		117	4				50.4	A0A0J9YY99;P0DP03;P01768;A0A075B6Q5	A0A0J9YY99;P0DP03;P01768	7	1	False;False;False;False;True;False;False
		tr|A0A0U1RQD2|A0A0U1RQD2_HUMAN Coiled-coil domain-containing protein 149 OS=Homo sapiens OX=9606 GN=CCDC149 PE=1 SV=1	27.2166	22.3097	22.3097	1	1	1	1	2	2	2	60.467	0.051181	5.4663	155960000	0	540	540	1	1	1	1	2	A0A0U1RQD2	A0A0U1RQD2	1	1	TRUE
Fermitin family homolog 2	FERMT2	tr|A0A0U1RRM8|A0A0U1RRM8_HUMAN Fermitin family homolog 2 (Fragment) OS=Homo sapiens OX=9606 GN=FERMT2 PE=1 SV=1;tr|H0YJ34|H0YJ34_HUMAN Fermitin family homolog 2 (Fragment) OS=Homo sapiens OX=9606 GN=FERMT2 PE=1 SV=1;sp|Q96AC1|FERM2_HUMAN Fermitin family ho	27.2528	22.3948	22.3948	1	1	1	1	2.8	2.8	2.8	61.796	0.097179	5.2737	159920000	1		545	3				2.8	A0A0U1RRM8;H0YJ34;Q96AC1	A0A0U1RRM8;H0YJ34;Q96AC1	1	1	TRUE
Selenoprotein P	SEPP1	tr|A0A182DWH7|A0A182DWH7_HUMAN Selenoprotein P (Fragment) OS=Homo sapiens OX=9606 GN=SELENOP PE=1 SV=1;sp|P49908|SEPP1_HUMAN Selenoprotein P OS=Homo sapiens OX=9606 GN=SELENOP PE=1 SV=3	24.0832	20.3828	20.3828	2	2	2	2	6.8	6.8	6.8	35.116	0	11.256	17773000	2		310	2				6.8	A0A182DWH7;P49908	A0A182DWH7;P49908	2	2	True;True
Trinucleotide repeat-containing gene 6C protein	TNRC6C	tr|A0A1B0GU24|A0A1B0GU24_HUMAN Trinucleotide repeat-containing gene 6C protein OS=Homo sapiens OX=9606 GN=TNRC6C PE=1 SV=1;sp|Q9HCJ0|TNR6C_HUMAN Trinucleotide repeat-containing gene 6C protein OS=Homo sapiens OX=9606 GN=TNRC6C PE=1 SV=3	25.0522	18.9861	18.9861	1	1	1	1	1.3	1.3	1.3	202.72	0.10131	5.2852	34790000	0		1944	2				1.3	A0A1B0GU24;Q9HCJ0	A0A1B0GU24;Q9HCJ0	1	1	TRUE
Cilia- and flagella-associated protein 54	CFAP54	tr|H0YIB5|H0YIB5_HUMAN Cilia- and flagella-associated protein 54 (Fragment) OS=Homo sapiens OX=9606 GN=CFAP54 PE=1 SV=1;tr|A0A1B0GU80|A0A1B0GU80_HUMAN Cilia- and flagella-associated protein 54 (Fragment) OS=Homo sapiens OX=9606 GN=CFAP54 PE=1 SV=1;sp|Q96N2				1	1	1	1	5.3	5.3	5.3	31.177	0.069091	5.373	0	1		265	3				5.3	H0YIB5;A0A1B0GU80;Q96N23	H0YIB5;A0A1B0GU80;Q96N23	1	1	TRUE
Methyl-CpG-binding domain protein 3-like 2;Putative methyl-CpG-binding domain protein 3-like 5;Putative methyl-CpG-binding domain protein 3-like 3;Putative methyl-CpG-binding domain protein 3-like 4	MBD3L2;MBD3L5;MBD3L3;MBD3L4	sp|A0A1B0GVZ6|MB3LB_HUMAN Methyl-CpG-binding domain protein 3-like 2B OS=Homo sapiens OX=9606 GN=MBD3L2B PE=3 SV=1;sp|Q8NHZ7|MB3L2_HUMAN Methyl-CpG-binding domain protein 3-like 2 OS=Homo sapiens OX=9606 GN=MBD3L2 PE=2 SV=3;sp|A6NJ08|MB3L5_HUMAN Putative m	28.0497	25.4648	25.4648	1	1	1	1	4.4	4.4	4.4	22.665	0.066914	5.397	277850000	2		204	5				4.4	A0A1B0GVZ6;Q8NHZ7;A6NJ08;A6NE82;A6NDZ8	A0A1B0GVZ6;Q8NHZ7;A6NJ08;A6NE82;A6NDZ8	1	1	TRUE
		tr|A0A1W2PSD9|A0A1W2PSD9_HUMAN Adhesion G-protein-coupled receptor D2 (Fragment) OS=Homo sapiens OX=9606 GN=ADGRD2 PE=4 SV=1	25.1092	21.3019	21.3019	1	1	1	1	4.4	4.4	4.4	40.112	0.10098	5.285	36194000	2	367	367	1	1	1	1	4.4	A0A1W2PSD9	A0A1W2PSD9	1	1	TRUE
Ig gamma-3 chain C region	IGHG3	tr|A0A286YES1|A0A286YES1_HUMAN Immunoglobulin heavy constant gamma 3 (Fragment) OS=Homo sapiens OX=9606 GN=IGHG3 PE=1 SV=1;sp|P01860|IGHG3_HUMAN Immunoglobulin heavy constant gamma 3 OS=Homo sapiens OX=9606 GN=IGHG3 PE=1 SV=2	33.7167	29.4688	29.4688	7	19	11	7	47.5	35.9	26.5	49.021	0	323.31	14117000000	202		446	2				47.5	A0A286YES1;P01860	A0A286YES1;P01860	19	11	False;True;False;False;True;True;True;False;True;False;True;False;True;True;True;False;False;True;True
Ig gamma-2 chain C region	IGHG2	tr|A0A286YEY4|A0A286YEY4_HUMAN Immunoglobulin heavy constant gamma 2 (Fragment) OS=Homo sapiens OX=9606 GN=IGHG2 PE=1 SV=1;sp|P01859|IGHG2_HUMAN Immunoglobulin heavy constant gamma 2 OS=Homo sapiens OX=9606 GN=IGHG2 PE=1 SV=2	33.0186	29.2112	29.2112	7	18	8	7	52.2	33.4	29.9	43.805	0	285.03	8701400000	77		395	2				52.2	A0A286YEY4;P01859	A0A286YEY4;P01859	18	8	True;False;False;False;False;True;False;False;False;True;False;False;True;True;True;True;True;False
Ig gamma-4 chain C region	IGHG4	tr|A0A286YFJ8|A0A286YFJ8_HUMAN Immunoglobulin heavy constant gamma 4 (Fragment) OS=Homo sapiens OX=9606 GN=IGHG4 PE=1 SV=1;sp|P01861|IGHG4_HUMAN Immunoglobulin heavy constant gamma 4 OS=Homo sapiens OX=9606 GN=IGHG4 PE=1 SV=1	33.0886	29.1817	29.1817	6	13	6	6	46.5	25.3	25.3	43.831	0	73.232	9134000000	44		396	2				46.5	A0A286YFJ8;P01861	A0A286YFJ8;P01861	13	6	False;True;False;False;False;False;True;True;True;False;False;True;True
Ig kappa chain V-I region AU;Ig kappa chain V-I region AG		tr|A0A2Q2TTZ9|A0A2Q2TTZ9_HUMAN Immunoglobulin kappa variable 1-33 OS=Homo sapiens OX=9606 GN=IGKV1D-33 PE=1 SV=1;sp|P01594|KV133_HUMAN Immunoglobulin kappa variable 1-33 OS=Homo sapiens OX=9606 GN=IGKV1-33 PE=1 SV=2;sp|P01593|KVD33_HUMAN Immunoglobulin kap	33.3526	31.3526	31.3526	4	4	4	4	56.5	56.5	56.5	11.842	0	226.64	10968000000	58		108	3				56.5	A0A2Q2TTZ9;P01594;P01593	A0A2Q2TTZ9;P01594;P01593	4	4	True;True;True;True
Actin, aortic smooth muscle;POTE ankyrin domain family member F;POTE ankyrin domain family member I;Actin, alpha cardiac muscle 1;Actin, cytoplasmic 1;Actin, cytoplasmic 1, N-terminally processed;Actin, alpha skeletal muscle;Actin, gamma-enteric smooth muscle;Actin, cytoplasmic 2;Actin, cytoplasmic 2, N-terminally processed;POTE ankyrin domain family member E	ACTG2;ACTB;ACTA1;ACTG1;ACTA2;POTEF;POTEI;ACTC1;POTEE	tr|F8WCH0|F8WCH0_HUMAN Actin, gamma-enteric smooth muscle OS=Homo sapiens OX=9606 GN=ACTG2 PE=1 SV=1;tr|E7EVS6|E7EVS6_HUMAN Actin, cytoplasmic 1 (Fragment) OS=Homo sapiens OX=9606 GN=ACTB PE=1 SV=8;tr|A0A2R8Y793|A0A2R8Y793_HUMAN Actin, cytoplasmic 1 (Fragm	23.6593	21.6593	21.6593	1	1	1	1	21.2	21.2	21.2	5.5702	0.061538	5.4421	13248000	1		52	29				21.2	F8WCH0;E7EVS6;A0A2R8Y793;A6NL76;I3L4N8;I3L1U9;I3L3I0;C9JTX5;A0A2R8YGF8;I3L3R2;J3KT65;F6QUT6;C9JFL5;K7EM38;G5E9R0;B8ZZJ2;F8WB63;C9JZR7;C9JUM1;F6UVQ4;P62736;A5A3E0;P0CG38;P68032;P60709;P68133;P63267;P63261;Q6S8J3	F8WCH0;E7EVS6;A0A2R8Y793;A6NL76;I3L4N8;I3L1U9;I3L3I0;C9JTX5;A0A2R8YGF8;I3L3R2;J3KT65;F6QUT6;C9JFL5;K7EM38;G5E9R0;B8ZZJ2;F8WB63;C9JZR7;C9JUM1;F6UVQ4;P62736;A5A3E0;P0CG38;P68032;P60709;P68133;P63267;P63261;Q6S8J3	1	1	TRUE
Uncharacterized protein C4orf29	C4orf29	tr|B7WP89|B7WP89_HUMAN Protein ABHD18 OS=Homo sapiens OX=9606 GN=ABHD18 PE=1 SV=1;tr|A0A2R8YEZ0|A0A2R8YEZ0_HUMAN Protein ABHD18 OS=Homo sapiens OX=9606 GN=ABHD18 PE=1 SV=1;sp|Q0P651|ABD18_HUMAN Protein ABHD18 OS=Homo sapiens OX=9606 GN=ABHD18 PE=2 SV=1	25.4662	21.2183	21.2183	1	1	1	1	2.4	2.4	2.4	43.353	0.10366	5.263	46355000	1		382	3				2.4	B7WP89;A0A2R8YEZ0;Q0P651	B7WP89;A0A2R8YEZ0;Q0P651	1	1	TRUE
CD59 glycoprotein	CD59	tr|E9PNW4|E9PNW4_HUMAN Uncharacterized protein OS=Homo sapiens OX=9606 PE=1 SV=1;tr|A0A2U3TZL5|A0A2U3TZL5_HUMAN CD59 glycoprotein (Fragment) OS=Homo sapiens OX=9606 GN=CD59 PE=1 SV=1;sp|P13987|CD59_HUMAN CD59 glycoprotein OS=Homo sapiens OX=9606 GN=CD59 PE	23.0525	20.7306	20.7306	1	1	1	1	11.1	11.1	11.1	11.985	0.099678	5.2797	8699700	1		108	3				11.1	E9PNW4;A0A2U3TZL5;P13987	E9PNW4;A0A2U3TZL5;P13987	1	1	TRUE
Neuropathy target esterase	PNPLA6	tr|A0A384DVU0|A0A384DVU0_HUMAN Neuropathy target esterase OS=Homo sapiens OX=9606 GN=PNPLA6 PE=1 SV=1;sp|Q8IY17|PLPL6_HUMAN Neuropathy target esterase OS=Homo sapiens OX=9606 GN=PNPLA6 PE=1 SV=3	24.5875	18.6568	18.6568	1	1	1	1	0.6	0.6	0.6	149.92	0.054688	5.4596	25210000	2		1365	2				0.6	A0A384DVU0;Q8IY17	A0A384DVU0;Q8IY17	1	1	TRUE
Complement factor H-related protein 2	CFHR2	tr|A0A3B3IQ51|A0A3B3IQ51_HUMAN Complement factor H-related protein 2 OS=Homo sapiens OX=9606 GN=CFHR2 PE=1 SV=1;sp|P36980|FHR2_HUMAN Complement factor H-related protein 2 OS=Homo sapiens OX=9606 GN=CFHR2 PE=1 SV=1;tr|V9GYE7|V9GYE7_HUMAN Complement factor H	25.5835	21.5835	21.5835	2	5	2	2	29.9	6.2	6.2	39.415	0	36.508	50280000	5		355	7				29.9	A0A3B3IQ51;P36980;V9GYE7;A0A3B3ISW6;A0A3B3IS00;A0A3B3IRW0;A0A3B3IS28	A0A3B3IQ51;P36980;V9GYE7;A0A3B3ISW6;A0A3B3IS00	5	2	False;True;False;False;True
Dedicator of cytokinesis protein 2	DOCK2	tr|A0A3B3IRS9|A0A3B3IRS9_HUMAN Dedicator of cytokinesis protein 2 (Fragment) OS=Homo sapiens OX=9606 GN=DOCK2 PE=1 SV=1;tr|A0A3B3ISB1|A0A3B3ISB1_HUMAN Dedicator of cytokinesis protein 2 (Fragment) OS=Homo sapiens OX=9606 GN=DOCK2 PE=1 SV=1;tr|E5RFJ0|E5RFJ0	25.6813	23.6812	23.6812	1	1	1	1	35.4	35.4	35.4	8.9863	0.10299	5.2892	53806000	1		82	4				35.4	A0A3B3IRS9;A0A3B3ISB1;E5RFJ0;Q92608	A0A3B3IRS9;A0A3B3ISB1;E5RFJ0;Q92608	1	1	TRUE
Complement C1r subcomponent;Complement C1r subcomponent heavy chain;Complement C1r subcomponent light chain	C1R	tr|A0A3B3ISR2|A0A3B3ISR2_HUMAN Complement C1r subcomponent OS=Homo sapiens OX=9606 GN=C1R PE=1 SV=1;tr|B4DPQ0|B4DPQ0_HUMAN Complement C1r subcomponent OS=Homo sapiens OX=9606 GN=C1R PE=1 SV=1;tr|F5H2D0|F5H2D0_HUMAN Complement C1r subcomponent OS=Homo sapie	28.1236	23.0361	23.0361	8	8	8	8	15.9	15.9	15.9	80.173	0	55.046	292450000	16		705	9				15.9	A0A3B3ISR2;B4DPQ0;F5H2D0;P00736;A0A3B3ITU4;F5H1V0;F5H6Y3;H0YFL7;Q9NZP8	A0A3B3ISR2;B4DPQ0;F5H2D0;P00736;A0A3B3ITU4	8	8	True;True;True;True;True;True;True;True
Disks large homolog 2	DLG2	tr|Q6ZSU2|Q6ZSU2_HUMAN Disks large homolog 2 OS=Homo sapiens OX=9606 GN=DLG2 PE=1 SV=1;tr|F8VYC1|F8VYC1_HUMAN Disks large homolog 2 (Fragment) OS=Homo sapiens OX=9606 GN=DLG2 PE=1 SV=1;tr|E9PIW2|E9PIW2_HUMAN Disks large homolog 2 OS=Homo sapiens OX=9606 GN				1	1	1	1	3.1	3.1	3.1	59.317	0.073944	5.3502	0	1		552	8				3.1	Q6ZSU2;F8VYC1;E9PIW2;B7Z2T4;E9PN83;A0A3B3ISW2;A0A3B3ITF1;Q15700	Q6ZSU2;F8VYC1;E9PIW2;B7Z2T4;E9PN83;A0A3B3ISW2;A0A3B3ITF1;Q15700	1	1	TRUE
Long-chain-fatty-acid--CoA ligase 6	ACSL6	tr|A0A494C046|A0A494C046_HUMAN Long-chain-fatty-acid--CoA ligase 6 (Fragment) OS=Homo sapiens OX=9606 GN=ACSL6 PE=4 SV=1;tr|A0A494C1I9|A0A494C1I9_HUMAN Long-chain-fatty-acid--CoA ligase 6 OS=Homo sapiens OX=9606 GN=ACSL6 PE=4 SV=1;tr|A0A494C005|A0A494C005_				1	1	1	1	6.2	6.2	6.2	27.017	0.10542	5.2611	0	1		242	11				6.2	A0A494C046;A0A494C1I9;A0A494C005;A0A494C0A5;A0A494BZW8;A0A494C0J9;E7ERD7;C9J8C7;A0A494C116;A0A494C0B6;Q9UKU0	A0A494C046;A0A494C1I9;A0A494C005;A0A494C0A5;A0A494BZW8;A0A494C0J9;E7ERD7;C9J8C7;A0A494C116;A0A494C0B6;Q9UKU0	1	1	TRUE
Ig lambda-7 chain C region	IGLC7	sp|A0M8Q6|IGLC7_HUMAN Immunoglobulin lambda constant 7 OS=Homo sapiens OX=9606 GN=IGLC7 PE=1 SV=3	33.3342	30.5268	30.5268	4	9	5	4	66	31.1	31.1	11.253	0	48.771	10829000000	23	106	106	1	9	5	4	66	A0M8Q6	A0M8Q6	9	5	False;False;True;True;True;True;True;False;False
von Willebrand factor A domain-containing protein 3A	VWA3A	sp|A6NCI4|VWA3A_HUMAN von Willebrand factor A domain-containing protein 3A OS=Homo sapiens OX=9606 GN=VWA3A PE=2 SV=3	23.7558	17.8016	17.8016	1	1	1	1	1.8	1.8	1.8	134.02	0.064394	5.4274	14165000	0	1184	1184	1	1	1	1	1.8	A6NCI4	A6NCI4	1	1	TRUE
Apolipoprotein C-III	APOC3	tr|B0YIW2|B0YIW2_HUMAN Apolipoprotein C-III OS=Homo sapiens OX=9606 GN=APOC3 PE=1 SV=1;sp|P02656|APOC3_HUMAN Apolipoprotein C-III OS=Homo sapiens OX=9606 GN=APOC3 PE=1 SV=1	30.7119	27.9045	27.9045	7	7	7	7	33.3	33.3	33.3	12.815	0	181.01	1758700000	21		117	2				33.3	B0YIW2;P02656	B0YIW2;P02656	7	7	True;True;True;True;True;True;True
Fibulin-1	FBLN1	tr|B1AHL2|B1AHL2_HUMAN Fibulin-1 OS=Homo sapiens OX=9606 GN=FBLN1 PE=1 SV=1;sp|P23142|FBLN1_HUMAN Fibulin-1 OS=Homo sapiens OX=9606 GN=FBLN1 PE=1 SV=4	23.3596	18.4054	18.4054	2	2	2	2	4.2	4.2	4.2	78.329	0	12.321	10763000	2		721	2				4.2	B1AHL2;P23142	B1AHL2;P23142	2	2	True;True
Protein SMG7	SMG7	tr|E9PEK3|E9PEK3_HUMAN Protein SMG7 OS=Homo sapiens OX=9606 GN=SMG7 PE=1 SV=1;tr|B1ALB4|B1ALB4_HUMAN Protein SMG7 (Fragment) OS=Homo sapiens OX=9606 GN=SMG7 PE=1 SV=8;tr|E9PD50|E9PD50_HUMAN Protein SMG7 OS=Homo sapiens OX=9606 GN=SMG7 PE=1 SV=1;sp|Q92540|S	23.2973	20.1274	20.1274	1	1	1	1	5.4	5.4	5.4	20.583	0.064151	5.4231	10308000	0		184	4				5.4	E9PEK3;B1ALB4;E9PD50;Q92540	E9PEK3;B1ALB4;E9PD50;Q92540	1	1	TRUE
Solute carrier family 12 member 6	SLC12A6	tr|B3KXX3|B3KXX3_HUMAN Solute carrier family 12 member 6 OS=Homo sapiens OX=9606 GN=SLC12A6 PE=1 SV=1;sp|Q9UHW9|S12A6_HUMAN Solute carrier family 12 member 6 OS=Homo sapiens OX=9606 GN=SLC12A6 PE=1 SV=2				1	1	1	1	1	1	1	106.94	0.0046948	6.0548	0	2		962	2				1	B3KXX3;Q9UHW9	B3KXX3;Q9UHW9	1	1	TRUE
Fragile X mental retardation syndrome-related protein 1	FXR1	tr|C9JAJ4|C9JAJ4_HUMAN Fragile X mental retardation syndrome-related protein 1 (Fragment) OS=Homo sapiens OX=9606 GN=FXR1 PE=1 SV=1;tr|B4DXZ6|B4DXZ6_HUMAN Fragile X mental retardation syndrome-related protein 1 OS=Homo sapiens OX=9606 GN=FXR1 PE=1 SV=1;sp|	23.597	20.275	20.275	1	1	1	1	9.3	9.3	9.3	17.868	0.092466	5.3041	12688000	1		151	3				9.3	C9JAJ4;B4DXZ6;P51114	C9JAJ4;B4DXZ6;P51114	1	1	TRUE
Complement factor B;Complement factor B Ba fragment;Complement factor B Bb fragment	CFB	tr|B4E1Z4|B4E1Z4_HUMAN cDNA FLJ55673, highly similar to Complement factor B OS=Homo sapiens OX=9606 PE=1 SV=1;tr|E7ETN3|E7ETN3_HUMAN Uncharacterized protein OS=Homo sapiens OX=9606 PE=1 SV=1;sp|P00751|CFAB_HUMAN Complement factor B OS=Homo sapiens OX=9606	29.8229	23.8006	23.8006	17	26	26	17	25.9	25.9	17.9	140.94	0	248.36	949710000	53		1266	17				25.9	B4E1Z4;E7ETN3;P00751;H7C5H1;A0A0G2JH38;E9PDZ0;A0A0G2JK28;A0A0G2JJ82;H7C526;H0Y868;A0A0G2JHM4;C9JRT3;A0A0G2JI59;Q8N6L6;A2ABG0;C9JYQ5;F2Z3N2	B4E1Z4;E7ETN3;P00751	26	26	True;True;True;True;True;True;True;True;True;True;True;True;True;True;True;True;True;True;True;True;True;True;True;True;True;True
	ITIH4	tr|B7ZKJ8|B7ZKJ8_HUMAN ITIH4 protein OS=Homo sapiens OX=9606 GN=ITIH4 PE=1 SV=1;tr|H7C0L5|H7C0L5_HUMAN Inter-alpha-trypsin inhibitor heavy chain H4 (Fragment) OS=Homo sapiens OX=9606 GN=ITIH4 PE=1 SV=1	24.7634	19.304	19.304	1	11	1	1	13.4	1.7	1.7	103.88	0	7.2061	28479000	2		935	3				13.4	B7ZKJ8;H7C0L5;CON__Q3T052	B7ZKJ8;H7C0L5	11	1	False;False;True;False;False;False;False;False;False;False;False
Prothymosin alpha;Prothymosin alpha, N-terminally processed;Thymosin alpha-1	PTMA	tr|B8ZZQ6|B8ZZQ6_HUMAN Prothymosin alpha OS=Homo sapiens OX=9606 GN=PTMA PE=1 SV=1;sp|P06454|PTMA_HUMAN Prothymosin alpha OS=Homo sapiens OX=9606 GN=PTMA PE=1 SV=2;tr|B8ZZA1|B8ZZA1_HUMAN Prothymosin alpha OS=Homo sapiens OX=9606 GN=PTMA PE=1 SV=1;tr|B8ZZW7	25.0677	23.4827	23.4827	3	3	3	3	26.2	26.2	26.2	11.758	0	21.218	35167000	4		107	5				26.2	B8ZZQ6;P06454;B8ZZA1;B8ZZW7;H7C2N1	B8ZZQ6;P06454;B8ZZA1;B8ZZW7;H7C2N1	3	3	True;True;True
Metalloreductase STEAP3	STEAP3	tr|B8ZZX6|B8ZZX6_HUMAN Metalloreductase STEAP3 OS=Homo sapiens OX=9606 GN=STEAP3 PE=1 SV=1;sp|Q658P3|STEA3_HUMAN Metalloreductase STEAP3 OS=Homo sapiens OX=9606 GN=STEAP3 PE=1 SV=2	24.4966	20.2486	20.2486	1	1	1	1	2.4	2.4	2.4	50.628	0.008658	5.7271	23670000	1		457	2				2.4	B8ZZX6;Q658P3	B8ZZX6;Q658P3	1	1	TRUE
	RFTN2	tr|C9J6C2|C9J6C2_HUMAN Raftlin-2 (Fragment) OS=Homo sapiens OX=9606 GN=RFTN2 PE=1 SV=1	25.5622	22.7549	22.7549	1	1	1	1	8.6	8.6	8.6	12.992	0.04	5.4903	49544000	1	116	116	1	1	1	1	8.6	C9J6C2	C9J6C2	1	1	TRUE
Retinoic acid receptor responder protein 2	RARRES2	tr|C9J8S2|C9J8S2_HUMAN Retinoic acid receptor responder protein 2 (Fragment) OS=Homo sapiens OX=9606 GN=RARRES2 PE=1 SV=1;sp|Q99969|RARR2_HUMAN Retinoic acid receptor responder protein 2 OS=Homo sapiens OX=9606 GN=RARRES2 PE=1 SV=1	22.8947	19.8947	19.8947	1	1	1	1	6.3	6.3	6.3	17.813	0.06367	5.4035	7798100	0		159	2				6.3	C9J8S2;Q99969	C9J8S2;Q99969	1	1	TRUE
Fibrinogen gamma chain	FGG	tr|C9JEU5|C9JEU5_HUMAN Fibrinogen gamma chain OS=Homo sapiens OX=9606 GN=FGG PE=1 SV=1;tr|C9JC84|C9JC84_HUMAN Fibrinogen gamma chain OS=Homo sapiens OX=9606 GN=FGG PE=1 SV=1;sp|P02679|FIBG_HUMAN Fibrinogen gamma chain OS=Homo sapiens OX=9606 GN=FGG PE=1 SV	27.7915	23.091	23.091	6	6	6	6	22.2	22.2	22.2	50.322	0	44.383	232310000	10		445	5				22.2	C9JEU5;C9JC84;P02679;C9JPQ9;C9JU00	C9JEU5;C9JC84;P02679	6	6	True;True;True;True;True;True
	IGLL1	tr|C9JEE0|C9JEE0_HUMAN Immunoglobulin lambda-like polypeptide 1 (Fragment) OS=Homo sapiens OX=9606 GN=IGLL1 PE=1 SV=1	24.6831	21.5132	21.5132	1	1	1	1	3.9	3.9	3.9	19.227	0.0086207	5.7262	26938000	1	180	180	1	1	1	1	3.9	C9JEE0	C9JEE0	1	1	TRUE
Apolipoprotein D	APOD	tr|C9JF17|C9JF17_HUMAN Apolipoprotein D (Fragment) OS=Homo sapiens OX=9606 GN=APOD PE=1 SV=1;sp|P05090|APOD_HUMAN Apolipoprotein D OS=Homo sapiens OX=9606 GN=APOD PE=1 SV=1	27.8207	24.3613	24.3613	7	7	7	7	30.2	30.2	30.2	24.158	0	125.13	237070000	21		215	4				30.2	C9JF17;P05090;C9JX71;F8WBT9	C9JF17;P05090	7	7	True;True;True;True;True;True;True
Nucleobindin-1	NUCB1	tr|C9JKZ2|C9JKZ2_HUMAN Nucleobindin-1 (Fragment) OS=Homo sapiens OX=9606 GN=NUCB1 PE=1 SV=8;tr|H7BZI1|H7BZI1_HUMAN Nucleobindin-1 (Fragment) OS=Homo sapiens OX=9606 GN=NUCB1 PE=1 SV=1;sp|Q02818|NUCB1_HUMAN Nucleobindin-1 OS=Homo sapiens OX=9606 GN=NUCB1 PE	30.1872	26.1872	26.1872	2	2	2	2	4.5	4.5	4.5	31.066	0	11.564	1222500000	6		267	3				4.5	C9JKZ2;H7BZI1;Q02818	C9JKZ2;H7BZI1;Q02818	2	2	True;True
Interleukin-36 receptor antagonist protein	IL36RN	tr|C9JTH1|C9JTH1_HUMAN Interleukin-1 (Fragment) OS=Homo sapiens OX=9606 GN=IL36RN PE=1 SV=1;sp|Q9UBH0|I36RA_HUMAN Interleukin-36 receptor antagonist protein OS=Homo sapiens OX=9606 GN=IL36RN PE=1 SV=1				1	1	1	1	13.7	13.7	13.7	12.623	0.020661	5.5845	0	1		117	2				13.7	C9JTH1;Q9UBH0	C9JTH1;Q9UBH0	1	1	TRUE
Alpha-2-HS-glycoprotein;Alpha-2-HS-glycoprotein chain A;Alpha-2-HS-glycoprotein chain B	AHSG	tr|C9JV77|C9JV77_HUMAN Alpha-2-HS-glycoprotein OS=Homo sapiens OX=9606 GN=AHSG PE=1 SV=1;sp|P02765|FETUA_HUMAN Alpha-2-HS-glycoprotein OS=Homo sapiens OX=9606 GN=AHSG PE=1 SV=2	26.715	23.0146	23.0146	5	6	6	5	24.2	24.2	22.3	39.411	0	42.484	110160000	5		368	2				24.2	C9JV77;P02765	C9JV77;P02765	6	6	True;True;True;True;True;True
Vitamin D-binding protein	GC	tr|D6RF35|D6RF35_HUMAN Vitamin D-binding protein OS=Homo sapiens OX=9606 GN=GC PE=1 SV=1;sp|P02774|VTDB_HUMAN Vitamin D-binding protein OS=Homo sapiens OX=9606 GN=GC PE=1 SV=2;tr|D6RBJ7|D6RBJ7_HUMAN Vitamin D-binding protein OS=Homo sapiens OX=9606 GN=GC P	31.6412	26.7832	26.7832	27	27	27	27	62.4	62.4	62.4	53.02	0	323.31	3349300000	83		476	6				62.4	D6RF35;P02774;D6RBJ7;CON__Q3MHN5;CON__ENSEMBL:ENSBTAP00000018229;D6RF20	D6RF35;P02774;D6RBJ7	27	27	True;True;True;True;True;True;True;True;True;True;True;True;True;True;True;True;True;True;True;True;True;True;True;True;True;True;True
Elastin	ELN	tr|G3V0G6|G3V0G6_HUMAN Elastin OS=Homo sapiens OX=9606 GN=ELN PE=1 SV=1;tr|E7ENM0|E7ENM0_HUMAN Elastin OS=Homo sapiens OX=9606 GN=ELN PE=1 SV=1;tr|E7EN65|E7EN65_HUMAN Elastin OS=Homo sapiens OX=9606 GN=ELN PE=1 SV=1;tr|F8WAH6|F8WAH6_HUMAN Elastin OS=Homo s	26.1294	23.8075	23.8075	4	4	4	4	12.7	12.7	12.7	60.72	0	30.11	73409000	7		700	11				12.7	G3V0G6;E7ENM0;E7EN65;F8WAH6;P15502;E7ETP7;B3KRT8;G5E950;E7EWS8;E7EP82;E7ENW7	G3V0G6;E7ENM0;E7EN65;F8WAH6;P15502;E7ETP7;B3KRT8;G5E950	4	4	True;True;True;True
Nuclear receptor coactivator 2	NCOA2	tr|H0YBB6|H0YBB6_HUMAN Nuclear receptor coactivator 2 (Fragment) OS=Homo sapiens OX=9606 GN=NCOA2 PE=1 SV=2;tr|E7EWM1|E7EWM1_HUMAN Nuclear receptor coactivator 2 OS=Homo sapiens OX=9606 GN=NCOA2 PE=1 SV=2;sp|Q15596|NCOA2_HUMAN Nuclear receptor coactivator	24.9474	21.3624	21.3624	1	1	1	1	3.4	3.4	3.4	64.173	0.10417	5.2596	32354000	0		590	3				3.4	H0YBB6;E7EWM1;Q15596	H0YBB6;E7EWM1;Q15596	1	1	TRUE
Ceruloplasmin	CP	tr|E9PFZ2|E9PFZ2_HUMAN Ceruloplasmin OS=Homo sapiens OX=9606 GN=CP PE=1 SV=1;sp|P00450|CERU_HUMAN Ceruloplasmin OS=Homo sapiens OX=9606 GN=CP PE=1 SV=1	27.0188	21.5269	21.5269	5	5	5	5	8.8	8.8	8.8	108.82	0	36.492	135980000	6		946	5				8.8	E9PFZ2;P00450;D6RE86;H7C5R1;CON__ENSEMBL:ENSBTAP00000031900	E9PFZ2;P00450	5	5	True;True;True;True;True
HCLS1-associated protein X-1	HAX1	tr|E9PIQ7|E9PIQ7_HUMAN HCLS1-associated protein X-1 OS=Homo sapiens OX=9606 GN=HAX1 PE=1 SV=1;tr|Q5VYD6|Q5VYD6_HUMAN HCLS1-associated protein X-1 (Fragment) OS=Homo sapiens OX=9606 GN=HAX1 PE=1 SV=1;sp|O00165|HAX1_HUMAN HCLS1-associated protein X-1 OS=Homo	25.7319	22.4099	22.4099	1	1	1	1	7.3	7.3	7.3	17.167	0.089347	5.311	55727000	1		151	3				7.3	E9PIQ7;Q5VYD6;O00165	E9PIQ7;Q5VYD6;O00165	1	1	TRUE
Prothrombin;Activation peptide fragment 1;Activation peptide fragment 2;Thrombin light chain;Thrombin heavy chain	F2	tr|E9PIT3|E9PIT3_HUMAN Prothrombin OS=Homo sapiens OX=9606 GN=F2 PE=1 SV=1;sp|P00734|THRB_HUMAN Prothrombin OS=Homo sapiens OX=9606 GN=F2 PE=1 SV=2;tr|C9JV37|C9JV37_HUMAN Prothrombin (Fragment) OS=Homo sapiens OX=9606 GN=F2 PE=1 SV=1	27.2499	22.343	22.343	11	11	11	11	31.2	31.2	31.2	65.408	0	75.942	159600000	15		583	4				31.2	E9PIT3;P00734;C9JV37;CON__P00735	E9PIT3;P00734;C9JV37	11	11	True;True;True;True;True;True;True;True;True;True;True
BTB/POZ domain-containing protein KCTD21	KCTD21	tr|E9PK99|E9PK99_HUMAN BTB/POZ domain-containing protein KCTD21 OS=Homo sapiens OX=9606 GN=KCTD21 PE=1 SV=1;tr|E9PMS5|E9PMS5_HUMAN BTB/POZ domain-containing protein KCTD21 (Fragment) OS=Homo sapiens OX=9606 GN=KCTD21 PE=1 SV=8;tr|E9PRT1|E9PRT1_HUMAN BTB/PO	24.732	22.4101	22.4101	1	1	1	1	39.4	39.4	39.4	7.89	0.10197	5.2862	27866000	0		71	5				39.4	E9PK99;E9PMS5;E9PRT1;E9PJJ5;Q4G0X4	E9PK99;E9PMS5;E9PRT1;E9PJJ5;Q4G0X4	1	1	TRUE
Midkine	MDK	tr|E9PPJ5|E9PPJ5_HUMAN Midkine (Fragment) OS=Homo sapiens OX=9606 GN=MDK PE=1 SV=1;tr|E9PLM6|E9PLM6_HUMAN Midkine OS=Homo sapiens OX=9606 GN=MDK PE=1 SV=1;sp|P21741|MK_HUMAN Midkine OS=Homo sapiens OX=9606 GN=MDK PE=1 SV=1	23.7167	20.7167	20.7167	1	1	1	1	7.6	7.6	7.6	14.374	0	8.7667	13786000	2		131	3				7.6	E9PPJ5;E9PLM6;P21741	E9PPJ5;E9PLM6;P21741	1	1	TRUE
Uteroglobin	SCGB1A1	tr|E9PN95|E9PN95_HUMAN Uteroglobin OS=Homo sapiens OX=9606 GN=SCGB1A1 PE=1 SV=1;sp|P11684|UTER_HUMAN Uteroglobin OS=Homo sapiens OX=9606 GN=SCGB1A1 PE=1 SV=1	22.4883	20.4884	20.4884	1	1	1	1	17.9	17.9	17.9	6.2852	0.036437	5.5168	5883900	0		56	2				17.9	E9PN95;P11684	E9PN95;P11684	1	1	TRUE
Galactosylgalactosylxylosylprotein 3-beta-glucuronosyltransferase 3	B3GAT3	tr|E9PNA1|E9PNA1_HUMAN Galactosylgalactosylxylosylprotein 3-beta-glucuronosyltransferase (Fragment) OS=Homo sapiens OX=9606 GN=B3GAT3 PE=1 SV=1;tr|G3V150|G3V150_HUMAN Galactosylgalactosylxylosylprotein 3-beta-glucuronosyltransferase OS=Homo sapiens OX=9606	24.9904	21.6685	21.6685	1	1	1	1	3.1	3.1	3.1	24.482	0.039841	5.4882	33333000	1		223	4				3.1	E9PNA1;G3V150;REV__Q9BRK4;O94766	E9PNA1;G3V150;REV__Q9BRK4;O94766	1	1	TRUE
	AMPD3	tr|E9PPG2|E9PPG2_HUMAN AMP deaminase 3 (Fragment) OS=Homo sapiens OX=9606 GN=AMPD3 PE=1 SV=1	25.1771	23.1772	23.1772	1	1	1	1	26.1	26.1	26.1	12.579	0.099359	5.2795	37938000	2	111	111	1	1	1	1	26.1	E9PPG2	E9PPG2	1	1	TRUE
	RFX5	tr|F2Z2G0|F2Z2G0_HUMAN DNA-binding protein RFX5 OS=Homo sapiens OX=9606 GN=RFX5 PE=1 SV=1	23.8634	22.8634	22.8634	1	1	1	1	20	20	20	5.1437	0.073684	5.3481	15262000	0	50	50	1	1	1	1	20	F2Z2G0	F2Z2G0	1	1	TRUE
DNA ligase;DNA ligase 1	LIG1	tr|M0R0Q7|M0R0Q7_HUMAN DNA ligase OS=Homo sapiens OX=9606 GN=LIG1 PE=1 SV=1;tr|F5GZ28|F5GZ28_HUMAN DNA ligase OS=Homo sapiens OX=9606 GN=LIG1 PE=1 SV=1;sp|P18858|DNLI1_HUMAN DNA ligase 1 OS=Homo sapiens OX=9606 GN=LIG1 PE=1 SV=1	27.3493	21.9917	21.9917	1	1	1	1	1.4	1.4	1.4	88.386	0.0045872	5.9717	170980000	2		800	3				1.4	M0R0Q7;F5GZ28;P18858	M0R0Q7;F5GZ28;P18858	1	1	TRUE
Sodium-coupled neutral amino acid transporter 2	SLC38A2	tr|F8VQW8|F8VQW8_HUMAN Sodium-coupled neutral amino acid transporter 2 OS=Homo sapiens OX=9606 GN=SLC38A2 PE=1 SV=1;sp|Q96QD8|S38A2_HUMAN Sodium-coupled neutral amino acid transporter 2 OS=Homo sapiens OX=9606 GN=SLC38A2 PE=1 SV=2	25.0004	22.193	22.193	1	1	1	1	2.3	2.3	2.3	38.71	0.0086957	5.7374	33564000	1		344	2				2.3	F8VQW8;Q96QD8	F8VQW8;Q96QD8	1	1	TRUE
Transmembrane and TPR repeat-containing protein 1	TMTC1	tr|F8VTQ9|F8VTQ9_HUMAN Protein O-mannosyl-transferase TMTC1 OS=Homo sapiens OX=9606 GN=TMTC1 PE=1 SV=1;tr|F8VXU8|F8VXU8_HUMAN Protein O-mannosyl-transferase TMTC1 OS=Homo sapiens OX=9606 GN=TMTC1 PE=1 SV=1;sp|Q8IUR5|TMTC1_HUMAN Protein O-mannosyl-transfera	26.087	20.4723	20.4723	1	1	1	1	0.7	0.7	0.7	106.12	0.10231	5.2868	71280000	2		944	3				0.7	F8VTQ9;F8VXU8;Q8IUR5	F8VTQ9;F8VXU8;Q8IUR5	1	1	TRUE
Matrix metalloproteinase-14	MMP14	tr|F8W1B7|F8W1B7_HUMAN Matrix metalloproteinase-14 (Fragment) OS=Homo sapiens OX=9606 GN=MMP14 PE=1 SV=1;sp|P50281|MMP14_HUMAN Matrix metalloproteinase-14 OS=Homo sapiens OX=9606 GN=MMP14 PE=1 SV=3				1	1	1	1	6.2	6.2	6.2	22.326	0.065934	5.3874	0	1		194	2				6.2	F8W1B7;P50281	F8W1B7;P50281	1	1	TRUE
	HBA2	tr|G3V1N2|G3V1N2_HUMAN HCG1745306, isoform CRA_a OS=Homo sapiens OX=9606 GN=HBA2 PE=1 SV=1	25.8644	23.2794	23.2794	2	5	2	2	49.1	21.8	21.8	11.948	0	16.689	61089000	3	110	110	1	5	2	2	49.1	G3V1N2	G3V1N2	5	2	True;True;False;False;False
MAGUK p55 subfamily member 5	MPP5	tr|G3V2B0|G3V2B0_HUMAN MAGUK p55 subfamily member 5 OS=Homo sapiens OX=9606 GN=MPP5 PE=1 SV=1;sp|Q8N3R9|MPP5_HUMAN MAGUK p55 subfamily member 5 OS=Homo sapiens OX=9606 GN=MPP5 PE=1 SV=3	23.4018	20.5944	20.5944	1	1	1	1	16.1	16.1	16.1	14.279	0.066421	5.3927	11083000	1		124	2				16.1	G3V2B0;Q8N3R9	G3V2B0;Q8N3R9	1	1	TRUE
Ribonuclease pancreatic	RNASE1	tr|G3V357|G3V357_HUMAN Ribonuclease pancreatic OS=Homo sapiens OX=9606 GN=RNASE1 PE=1 SV=1;sp|P07998|RNAS1_HUMAN Ribonuclease pancreatic OS=Homo sapiens OX=9606 GN=RNASE1 PE=1 SV=4	25.9044	23.3195	23.3195	2	2	2	2	30.2	30.2	30.2	13.049	0	16.264	62807000	4		116	2				30.2	G3V357;P07998	G3V357;P07998	2	2	True;True
Latent-transforming growth factor beta-binding protein 2	LTBP2	tr|G3V511|G3V511_HUMAN Latent-transforming growth factor beta-binding protein 2 OS=Homo sapiens OX=9606 GN=LTBP2 PE=1 SV=1;tr|G3V3X5|G3V3X5_HUMAN Latent-transforming growth factor beta-binding protein 2 OS=Homo sapiens OX=9606 GN=LTBP2 PE=1 SV=1;sp|Q14767|				1	1	1	1	0.8	0.8	0.8	189.24	0	6.8754	0	1		1769	3				0.8	G3V511;G3V3X5;Q14767	G3V511;G3V3X5;Q14767	1	1	TRUE
Chromogranin-A;Vasostatin-1;Vasostatin-2;EA-92;ES-43;Pancreastatin;SS-18;WA-8;WE-14;LF-19;Catestatin;AL-11;GV-19;GR-44;ER-37;GE-25;Serpinin-RRG;Serpinin;p-Glu serpinin precursor	CHGA	tr|G5E968|G5E968_HUMAN Chromogranin A (Parathyroid secretory protein 1), isoform CRA_b OS=Homo sapiens OX=9606 GN=CHGA PE=1 SV=1;sp|P10645|CMGA_HUMAN Chromogranin-A OS=Homo sapiens OX=9606 GN=CHGA PE=1 SV=7	23.6213	19.6213	19.6213	1	1	1	1	2.9	2.9	2.9	34.269	0	6.3447	12904000	1		306	2				2.9	G5E968;P10645	G5E968;P10645	1	1	TRUE
Signal transducer and activator of transcription;Signal transducer and activator of transcription 3	STAT3	tr|G8JLH9|G8JLH9_HUMAN Signal transducer and activator of transcription OS=Homo sapiens OX=9606 GN=STAT3 PE=1 SV=1;sp|P40763|STAT3_HUMAN Signal transducer and activator of transcription 3 OS=Homo sapiens OX=9606 GN=STAT3 PE=1 SV=2	18.8635	13.8191	13.8191	1	1	1	1	1.6	1.6	1.6	76.138	0.099042	5.2789	476950	0		672	2				1.6	G8JLH9;P40763	G8JLH9;P40763	1	1	TRUE
Golgin subfamily A member 4	GOLGA4	tr|H0Y6I0|H0Y6I0_HUMAN Golgin subfamily A member 4 (Fragment) OS=Homo sapiens OX=9606 GN=GOLGA4 PE=1 SV=1;sp|Q13439|GOGA4_HUMAN Golgin subfamily A member 4 OS=Homo sapiens OX=9606 GN=GOLGA4 PE=1 SV=1	24.663	17.6296	17.6296	1	1	1	1	1	1	1	246.6	0.098101	5.2764	26565000	0		2099	2				1	H0Y6I0;Q13439	H0Y6I0;Q13439	1	1	TRUE
Low affinity immunoglobulin gamma Fc region receptor III-A	FCGR3A	tr|H0Y755|H0Y755_HUMAN Low affinity immunoglobulin gamma Fc region receptor III-A (Fragment) OS=Homo sapiens OX=9606 GN=FCGR3A PE=1 SV=2;tr|M9MML0|M9MML0_HUMAN Low affinity immunoglobulin gamma Fc region receptor III-A OS=Homo sapiens OX=9606 GN=FCGR3A PE=	25.2676	22.2676	22.2676	3	3	3	3	11.7	11.7	11.7	34.722	0	18.293	40392000	4		307	9				11.7	H0Y755;M9MML0;P08637;C9JC71;A0A087WZR4;H0Y4U3;A0A3B3ISU3;M9MML6;O75015	H0Y755;M9MML0;P08637	3	3	True;True;True
DNA transposase THAP9	THAP9	tr|H0Y9F3|H0Y9F3_HUMAN DNA transposase THAP9 (Fragment) OS=Homo sapiens OX=9606 GN=THAP9 PE=1 SV=1;sp|Q9H5L6|THAP9_HUMAN DNA transposase THAP9 OS=Homo sapiens OX=9606 GN=THAP9 PE=1 SV=2	26.0758	22.9059	22.9059	1	1	1	1	14.9	14.9	14.9	14.24	0.063433	5.4015	70729000	2		121	2				14.9	H0Y9F3;Q9H5L6	H0Y9F3;Q9H5L6	1	1	TRUE
Intraflagellar transport protein 81 homolog	IFT81	tr|H0YHE2|H0YHE2_HUMAN Intraflagellar transport protein 81 homolog (Fragment) OS=Homo sapiens OX=9606 GN=IFT81 PE=1 SV=1;sp|Q8WYA0|IFT81_HUMAN Intraflagellar transport protein 81 homolog OS=Homo sapiens OX=9606 GN=IFT81 PE=1 SV=1	24.3948	19.1469	19.1469	1	1	1	1	1.6	1.6	1.6	73.366	0.10448	5.2597	22058000	0		624	2				1.6	H0YHE2;Q8WYA0	H0YHE2;Q8WYA0	1	1	TRUE
	MARK3	tr|H0YKJ3|H0YKJ3_HUMAN MAP/microtubule affinity-regulating kinase 3 (Fragment) OS=Homo sapiens OX=9606 GN=MARK3 PE=1 SV=1	28.0475	25.4625	25.4625	1	1	1	1	17.1	17.1	17.1	14.519	0.10462	5.2656	277410000	1	129	129	1	1	1	1	17.1	H0YKJ3	H0YKJ3	1	1	TRUE
M-phase phosphoprotein 6	MPHOSPH6	tr|H3BNK8|H3BNK8_HUMAN M-phase phosphoprotein 6, isoform CRA_b OS=Homo sapiens OX=9606 GN=MPHOSPH6 PE=1 SV=1;tr|H3BU96|H3BU96_HUMAN M-phase phosphoprotein 6 OS=Homo sapiens OX=9606 GN=MPHOSPH6 PE=1 SV=1;sp|Q99547|MPH6_HUMAN M-phase phosphoprotein 6 OS=Homo	26.0197	24.4348	24.4348	1	1	1	1	18.2	18.2	18.2	6.7357	0.10403	5.2922	68033000	0		55	3				18.2	H3BNK8;H3BU96;Q99547	H3BNK8;H3BU96;Q99547	1	1	TRUE
S phase cyclin A-associated protein in the endoplasmic reticulum	SCAPER	tr|H3BPM0|H3BPM0_HUMAN S phase cyclin A-associated protein in the endoplasmic reticulum (Fragment) OS=Homo sapiens OX=9606 GN=SCAPER PE=1 SV=1;tr|H3BS25|H3BS25_HUMAN S phase cyclin A-associated protein in the endoplasmic reticulum (Fragment) OS=Homo sapien	23.8216	18.6517	18.6517	1	1	1	1	1.2	1.2	1.2	85.203	0.10429	5.2649	14826000	1		747	3				1.2	H3BPM0;H3BS25;Q9BY12	H3BPM0;H3BS25;Q9BY12	1	1	TRUE
Tetraspanin;Tetraspanin-14	TSPAN14	tr|H7BXY6|H7BXY6_HUMAN Tetraspanin OS=Homo sapiens OX=9606 GN=TSPAN14 PE=1 SV=1;sp|Q8NG11|TSN14_HUMAN Tetraspanin-14 OS=Homo sapiens OX=9606 GN=TSPAN14 PE=1 SV=1	29.4924	26.3225	26.3225	1	1	1	1	3.8	3.8	3.8	23.918	0.067616	5.3601	755280000	1		213	2				3.8	H7BXY6;Q8NG11	H7BXY6;Q8NG11	1	1	TRUE
Collagen alpha-1(I) chain	COL1A1	tr|I3L3H7|I3L3H7_HUMAN Collagen alpha-1(I) chain (Fragment) OS=Homo sapiens OX=9606 GN=COL1A1 PE=1 SV=1;sp|P02452|CO1A1_HUMAN Collagen alpha-1(I) chain OS=Homo sapiens OX=9606 GN=COL1A1 PE=1 SV=5	23.3148	20.7297	20.7297	1	1	1	1	5.2	5.2	5.2	16.36	0.012712	5.6737	10434000	2		154	2				5.2	I3L3H7;P02452	I3L3H7;P02452	1	1	TRUE
Cathelicidin antimicrobial peptide;Antibacterial protein FALL-39;Antibacterial protein LL-37	CAMP	tr|J3KNB4|J3KNB4_HUMAN Cathelicidin antimicrobial peptide OS=Homo sapiens OX=9606 GN=CAMP PE=1 SV=1;sp|P49913|CAMP_HUMAN Cathelicidin antimicrobial peptide OS=Homo sapiens OX=9606 GN=CAMP PE=1 SV=1				1	1	1	1	6.4	6.4	6.4	19.591	0.064639	5.4278	0	1		173	2				6.4	J3KNB4;P49913	J3KNB4;P49913	1	1	TRUE
TraB domain-containing protein	TRABD	tr|J3KPT4|J3KPT4_HUMAN TraB domain-containing protein OS=Homo sapiens OX=9606 GN=TRABD PE=1 SV=1;sp|Q9H4I3|TRABD_HUMAN TraB domain-containing protein OS=Homo sapiens OX=9606 GN=TRABD PE=1 SV=1	26.2088	21.8869	21.8869	1	1	1	1	6.9	6.9	6.9	42.692	0.10334	5.2628	77561000	0		379	2				6.9	J3KPT4;Q9H4I3	J3KPT4;Q9H4I3	1	1	TRUE
TBC1 domain family member 8	TBC1D8	tr|J3KQ40|J3KQ40_HUMAN TBC1 domain family member 8 OS=Homo sapiens OX=9606 GN=TBC1D8 PE=1 SV=1;sp|O95759|TBCD8_HUMAN TBC1 domain family member 8 OS=Homo sapiens OX=9606 GN=TBC1D8 PE=1 SV=3	26.3927	20.6379	20.6379	1	1	1	1	0.9	0.9	0.9	132.42	0.098976	5.3037	88106000	1		1155	2				0.9	J3KQ40;O95759	J3KQ40;O95759	1	1	TRUE
	NAT9	tr|J3QL33|J3QL33_HUMAN N-acetyltransferase 9 OS=Homo sapiens OX=9606 GN=NAT9 PE=1 SV=1	28.0037	25.6818	25.6818	1	1	1	1	14.1	14.1	14.1	15.217	0.068841	5.3713	269130000	1	135	135	1	1	1	1	14.1	J3QL33	J3QL33	1	1	TRUE
Integrin beta	ITGB4	tr|J3QQL2|J3QQL2_HUMAN Integrin beta (Fragment) OS=Homo sapiens OX=9606 GN=ITGB4 PE=1 SV=1	27.4032	24.5959	24.5959	1	1	1	1	11.4	11.4	11.4	12.68	0.0090909	5.9338	177500000	2	114	114	1	1	1	1	11.4	J3QQL2	J3QQL2	1	1	TRUE
Granulins;Acrogranin;Paragranulin;Granulin-1;Granulin-2;Granulin-3;Granulin-4;Granulin-5;Granulin-6;Granulin-7	GRN	tr|K7EMR1|K7EMR1_HUMAN Progranulin (Fragment) OS=Homo sapiens OX=9606 GN=GRN PE=1 SV=1;tr|K7EKL3|K7EKL3_HUMAN Progranulin (Fragment) OS=Homo sapiens OX=9606 GN=GRN PE=1 SV=1;sp|P28799|GRN_HUMAN Progranulin OS=Homo sapiens OX=9606 GN=GRN PE=1 SV=2	23.5609	20.5609	20.5609	1	1	1	1	9.3	9.3	9.3	18.07	0	7.3434	12375000	1		172	3				9.3	K7EMR1;K7EKL3;P28799	K7EMR1;K7EKL3;P28799	1	1	TRUE
Ankyrin repeat and SOCS box protein 16	ASB16	tr|K7ELE0|K7ELE0_HUMAN Ankyrin repeat and SOCS box protein 16 OS=Homo sapiens OX=9606 GN=ASB16 PE=1 SV=1;sp|Q96NS5|ASB16_HUMAN Ankyrin repeat and SOCS box protein 16 OS=Homo sapiens OX=9606 GN=ASB16 PE=1 SV=2	23.6193	19.812	19.812	1	1	1	1	6.2	6.2	6.2	29.627	0.020747	5.5991	12886000	1		273	2				6.2	K7ELE0;Q96NS5	K7ELE0;Q96NS5	1	1	TRUE
Complement factor D	CFD	tr|K7ERG9|K7ERG9_HUMAN Complement factor D OS=Homo sapiens OX=9606 GN=CFD PE=1 SV=1;sp|P00746|CFAD_HUMAN Complement factor D OS=Homo sapiens OX=9606 GN=CFD PE=1 SV=5	27.3106	23.8512	23.8512	6	6	6	6	46.2	46.2	46.2	27.862	0	37.095	166460000	7		260	2				46.2	K7ERG9;P00746	K7ERG9;P00746	6	6	True;True;True;True;True;True
Apolipoprotein C-I;Truncated apolipoprotein C-I	APOC1	tr|K7ERI9|K7ERI9_HUMAN Apolipoprotein C-I (Fragment) OS=Homo sapiens OX=9606 GN=APOC1 PE=1 SV=1;sp|P02654|APOC1_HUMAN Apolipoprotein C-I OS=Homo sapiens OX=9606 GN=APOC1 PE=1 SV=1;tr|K7EJI9|K7EJI9_HUMAN Apolipoprotein C-I OS=Homo sapiens OX=9606 GN=APOC1 P	31.9379	30.3529	30.3529	7	7	7	7	42.9	42.9	42.9	8.647	0	76.617	4113900000	34		77	6				42.9	K7ERI9;P02654;K7EJI9;K7ELM9;K7EPF9;K7EKP1	K7ERI9;P02654;K7EJI9;K7ELM9;K7EPF9;K7EKP1	7	7	True;True;True;True;True;True;True
Guanine nucleotide-binding protein subunit gamma;Guanine nucleotide-binding protein G(I)/G(S)/G(O) subunit gamma-7	GNG7	tr|K7ESC6|K7ESC6_HUMAN Guanine nucleotide-binding protein G(I)/G(S)/G(O) subunit gamma-7 OS=Homo sapiens OX=9606 GN=GNG7 PE=1 SV=1;sp|O60262|GBG7_HUMAN Guanine nucleotide-binding protein G(I)/G(S)/G(O) subunit gamma-7 OS=Homo sapiens OX=9606 GN=GNG7 PE=1 S	26.3844	25.3844	25.3844	1	1	1	1	36.1	36.1	36.1	4.1227	0.10819	5.2548	87599000	1		36	2				36.1	K7ESC6;O60262	K7ESC6;O60262	1	1	TRUE
Cell division cycle 7-related protein kinase	CDC7	sp|O00311|CDC7_HUMAN Cell division cycle 7-related protein kinase OS=Homo sapiens OX=9606 GN=CDC7 PE=1 SV=1	24.8149	19.7705	19.7705	1	1	1	1	3.8	3.8	3.8	63.887	0.10398	5.2638	29515000	0	574	574	1	1	1	1	3.8	O00311	O00311	1	1	TRUE
C-C motif chemokine 21	CCL21	tr|Q5VZ73|Q5VZ73_HUMAN C-C motif chemokine 21 OS=Homo sapiens OX=9606 GN=CCL21 PE=1 SV=1;sp|O00585|CCL21_HUMAN C-C motif chemokine 21 OS=Homo sapiens OX=9606 GN=CCL21 PE=1 SV=1	27.141	24.5561	24.5561	5	5	5	5	42.7	42.7	42.7	13.564	0	30.723	148000000	4		124	2				42.7	Q5VZ73;O00585	Q5VZ73;O00585	5	5	True;True;True;True;True
Chromodomain-helicase-DNA-binding protein 1	CHD1	sp|O14646|CHD1_HUMAN Chromodomain-helicase-DNA-binding protein 1 OS=Homo sapiens OX=9606 GN=CHD1 PE=1 SV=2				1	1	1	1	1.1	1.1	1.1	196.69	0.10438	5.2931	0	1	1710	1710	1	1	1	1	1.1	O14646	O14646	1	1	TRUE
Apolipoprotein L1	APOL1	sp|O14791|APOL1_HUMAN Apolipoprotein L1 OS=Homo sapiens OX=9606 GN=APOL1 PE=1 SV=5	26.6971	22.4492	22.4492	5	5	5	5	12.3	12.3	12.3	43.974	0	54.786	108800000	8		398	2				12.3	O14791;B1AH96	O14791	5	5	True;True;True;True;True
CD5 antigen-like	CD5L	sp|O43866|CD5L_HUMAN CD5 antigen-like OS=Homo sapiens OX=9606 GN=CD5L PE=1 SV=1	27.1477	22.9778	22.9778	8	8	8	8	38.3	38.3	38.3	38.087	0	98.014	148690000	12	347	347	1	8	8	8	38.3	O43866	O43866	8	8	True;True;True;True;True;True;True;True
Histone H2B type F-S;Histone H2B type 1-K;Histone H2B type 1-C/E/F/G/I;Histone H2B type 1-D;Histone H2B type 1-L;Histone H2B type 1-M;Histone H2B type 1-N;Histone H2B type 1-H;Histone H2B type 2-F;Histone H2B;Histone H2B type 2-E;Histone H2B type 1-J;Histone H2B type 3-B;Histone H2B type 1-O;Histone H2B type 1-B	H2BFS;HIST1H2BK;HIST1H2BC;HIST1H2BD;HIST1H2BL;HIST1H2BM;HIST1H2BN;HIST1H2BH;HIST2H2BF;HIST2H2BE;HIST1H2BJ;HIST3H2BB;HIST1H2BO;HIST1H2BB	sp|P57053|H2BFS_HUMAN Histone H2B type F-S OS=Homo sapiens OX=9606 GN=H2BFS PE=1 SV=2;sp|O60814|H2B1K_HUMAN Histone H2B type 1-K OS=Homo sapiens OX=9606 GN=HIST1H2BK PE=1 SV=3;sp|P62807|H2B1C_HUMAN Histone H2B type 1-C/E/F/G/I OS=Homo sapiens OX=9606 GN=HI	29.2265	26.4192	26.4192	6	6	6	6	44.4	44.4	44.4	13.944	0	80.754	628150000	14		126	17				44.4	P57053;O60814;P62807;P58876;Q99880;Q99879;Q99877;Q93079;Q5QNW6;U3KQK0;Q16778;P06899;Q8N257;P23527;P33778;Q96A08;A0A2R8Y619	P57053;O60814;P62807;P58876;Q99880;Q99879;Q99877;Q93079;Q5QNW6;U3KQK0;Q16778;P06899;Q8N257;P23527;P33778	6	6	True;True;True;True;True;True
Peptidoglycan recognition protein 1	PGLYRP1	sp|O75594|PGRP1_HUMAN Peptidoglycan recognition protein 1 OS=Homo sapiens OX=9606 GN=PGLYRP1 PE=1 SV=1	28.6413	25.3194	25.3194	5	5	5	5	41.3	41.3	41.3	21.731	0	127.32	418690000	16	196	196	1	5	5	5	41.3	O75594	O75594	5	5	True;True;True;True;True
Calpain-15	CAPN15	sp|O75808|CAN15_HUMAN Calpain-15 OS=Homo sapiens OX=9606 GN=CAPN15 PE=1 SV=1	25.6425	19.9421	19.9421	1	1	1	1	1	1	1	117.31	0.067857	5.3613	52379000	1	1086	1086	1	1	1	1	1	O75808	O75808	1	1	TRUE
Apolipoprotein M	APOM	tr|Q5SRP5|Q5SRP5_HUMAN Apolipoprotein M OS=Homo sapiens OX=9606 GN=APOM PE=1 SV=1;sp|O95445|APOM_HUMAN Apolipoprotein M OS=Homo sapiens OX=9606 GN=APOM PE=1 SV=2	24.3014	21.1315	21.1315	1	1	1	1	5.4	5.4	5.4	14.185	0.097792	5.2752	20676000	2		129	2				5.4	Q5SRP5;O95445	Q5SRP5;O95445	1	1	TRUE
Cerberus	CER1	sp|O95813|CER1_HUMAN Cerberus OS=Homo sapiens OX=9606 GN=CER1 PE=1 SV=1	25.6706	22.0857	22.0857	1	1	1	1	8.2	8.2	8.2	30.083	0.1028	5.2688	53411000	0	267	267	1	1	1	1	8.2	O95813	O95813	1	1	TRUE
Haptoglobin-related protein	HPR	sp|P00739|HPTR_HUMAN Haptoglobin-related protein OS=Homo sapiens OX=9606 GN=HPR PE=2 SV=2;tr|A0A0A0MRD9|A0A0A0MRD9_HUMAN Haptoglobin-related protein OS=Homo sapiens OX=9606 GN=HPR PE=1 SV=1	26.7514	22.4295	22.4295	5	5	5	5	19	19	19	39.029	0	28.972	112970000	6		348	8				19	P00739;A0A0A0MRD9;A0A0C4DGL8;J3QR68;H0Y300;P00738;J3KTC3;A0A087WU08	P00739;A0A0A0MRD9	5	5	True;True;True;True;True
Plasminogen;Plasmin heavy chain A;Activation peptide;Angiostatin;Plasmin heavy chain A, short form;Plasmin light chain B	PLG	sp|P00747|PLMN_HUMAN Plasminogen OS=Homo sapiens OX=9606 GN=PLG PE=1 SV=2;tr|Q5TEH5|Q5TEH5_HUMAN HCG2029799, isoform CRA_b OS=Homo sapiens OX=9606 GN=PLG PE=1 SV=1;tr|A6PVI2|A6PVI2_HUMAN Plasminogen (Fragment) OS=Homo sapiens OX=9606 GN=PLG PE=1 SV=1	24.0043	18.578	18.578	2	2	2	2	4.4	4.4	4.4	90.568	0	12.475	16827000	1		810	3				4.4	P00747;Q5TEH5;A6PVI2	P00747;Q5TEH5;A6PVI2	2	2	True;True
Antithrombin-III	SERPINC1	sp|P01008|ANT3_HUMAN Antithrombin-III OS=Homo sapiens OX=9606 GN=SERPINC1 PE=1 SV=1;tr|Q8TCE1|Q8TCE1_HUMAN Antithrombin-III OS=Homo sapiens OX=9606 GN=SERPINC1 PE=1 SV=1	29.0923	24.3374	24.3374	16	16	16	16	47.8	47.8	47.8	52.602	0	143.24	572330000	31		464	3				47.8	P01008;Q8TCE1;CON__P41361	P01008;Q8TCE1	16	16	True;True;True;True;True;True;True;True;True;True;True;True;True;True;True;True
Alpha-1-antitrypsin;Short peptide from AAT	SERPINA1	sp|P01009|A1AT_HUMAN Alpha-1-antitrypsin OS=Homo sapiens OX=9606 GN=SERPINA1 PE=1 SV=3	34.3147	29.7911	29.7911	3	34	34	3	67.7	67.7	6.2	46.736	0	323.31	21367000000	183	418	418	1	34	34	3	67.7	P01009	P01009	34	34	True;True;True;True;True;True;True;True;True;True;True;True;True;True;True;True;True;True;True;True;True;True;True;True;True;True;True;True;True;True;True;True;True;True
Alpha-1-antichymotrypsin;Alpha-1-antichymotrypsin His-Pro-less	SERPINA3	sp|P01011|AACT_HUMAN Alpha-1-antichymotrypsin OS=Homo sapiens OX=9606 GN=SERPINA3 PE=1 SV=2;tr|G3V3A0|G3V3A0_HUMAN Alpha-1-antichymotrypsin OS=Homo sapiens OX=9606 GN=SERPINA3 PE=1 SV=1	28.0578	23.7359	23.7359	9	9	9	9	21.3	21.3	21.3	47.65	0	93.761	279410000	11		423	4				21.3	P01011;G3V3A0;G3V595;A0A087WY93	P01011;G3V3A0	9	9	True;True;True;True;True;True;True;True;True
Angiotensinogen;Angiotensin-1;Angiotensin-2;Angiotensin-3;Angiotensin-4;Angiotensin 1-9;Angiotensin 1-7;Angiotensin 1-5;Angiotensin 1-4	AGT	sp|P01019|ANGT_HUMAN Angiotensinogen OS=Homo sapiens OX=9606 GN=AGT PE=1 SV=1	23.9959	19.826	19.826	3	3	3	3	10.9	10.9	10.9	53.154	0	23.216	16730000	3	485	485	1	3	3	3	10.9	P01019	P01019	3	3	True;True;True
Complement C3;Complement C3 beta chain;C3-beta-c;Complement C3 alpha chain;C3a anaphylatoxin;Acylation stimulating protein;Complement C3b alpha chain;Complement C3c alpha chain fragment 1;Complement C3dg fragment;Complement C3g fragment;Complement C3d fragment;Complement C3f fragment;Complement C3c alpha chain fragment 2	C3	sp|P01024|CO3_HUMAN Complement C3 OS=Homo sapiens OX=9606 GN=C3 PE=1 SV=2	31.9711	25.4013	25.4013	62	62	62	62	45.6	45.6	45.6	187.15	0	323.31	4209800000	129		1663	7				45.6	P01024;CON__Q2UVX4;M0QXZ3;M0QYC8;M0R1Q1;M0R0Q9;O95568	P01024	62	62	True;True;True;True;True;True;True;True;True;True;True;True;True;True;True;True;True;True;True;True;True;True;True;True;True;True;True;True;True;True;True;True;True;True;True;True;True;True;True;True;True;True;True;True;True;True;True;True;True;True;True;True;True;True;True;True;True;True;True;True;True;True
Metalloproteinase inhibitor 1	TIMP1	tr|Q5H9B5|Q5H9B5_HUMAN Metalloproteinase inhibitor 1 OS=Homo sapiens OX=9606 GN=TIMP1 PE=1 SV=1;tr|Q5H9A7|Q5H9A7_HUMAN Metalloproteinase inhibitor 1 OS=Homo sapiens OX=9606 GN=TIMP1 PE=1 SV=1;sp|P01033|TIMP1_HUMAN Metalloproteinase inhibitor 1 OS=Homo sapi	24.4219	22.1	22.1	1	1	1	1	11.8	11.8	11.8	15.096	0.0046729	6.0155	22477000	1		136	3				11.8	Q5H9B5;Q5H9A7;P01033	Q5H9B5;Q5H9A7;P01033	1	1	TRUE
Kininogen-1;Kininogen-1 heavy chain;T-kinin;Bradykinin;Lysyl-bradykinin;Kininogen-1 light chain;Low molecular weight growth-promoting factor	KNG1	sp|P01042|KNG1_HUMAN Kininogen-1 OS=Homo sapiens OX=9606 GN=KNG1 PE=1 SV=2	29.3688	24.2395	24.2395	7	7	7	7	14.3	14.3	14.3	71.957	0	81.371	693230000	15	644	644	1	7	7	7	14.3	P01042	P01042	7	7	True;True;True;True;True;True;True
Immunoglobulin J chain	IGJ;JCHAIN	sp|P01591|IGJ_HUMAN Immunoglobulin J chain OS=Homo sapiens OX=9606 GN=JCHAIN PE=1 SV=4;tr|D6RD17|D6RD17_HUMAN Immunoglobulin J chain (Fragment) OS=Homo sapiens OX=9606 GN=JCHAIN PE=1 SV=8;tr|D6RHJ6|D6RHJ6_HUMAN Immunoglobulin J chain (Fragment) OS=Homo sap	29.3572	26.3572	26.3572	8	8	8	8	60.4	60.4	60.4	18.098	0	91.919	687680000	18		159	4				60.4	P01591;D6RD17;D6RHJ6;C9JA05	P01591;D6RD17;D6RHJ6	8	8	True;True;True;True;True;True;True;True
Ig kappa chain V-I region Gal		sp|P01599|KV117_HUMAN Immunoglobulin kappa variable 1-17 OS=Homo sapiens OX=9606 GN=IGKV1-17 PE=1 SV=2	29.4844	27.4845	27.4845	1	3	3	1	25.6	25.6	12.8	12.778	0	106.31	751110000	11	117	117	1	3	3	1	25.6	P01599	P01599	3	3	True;True;True
Ig kappa chain V-I region HK101		sp|P01601|KVD16_HUMAN Immunoglobulin kappa variable 1D-16 OS=Homo sapiens OX=9606 GN=IGKV1D-16 PE=3 SV=2	26.7607	24.7606	24.7606	1	1	1	1	13.7	13.7	13.7	12.73	0	81.63	113700000	6	117	117	1	1	1	1	13.7	P01601	P01601	1	1	TRUE
Ig kappa chain V-I region HK102	IGKV1-5	sp|P01602|KV105_HUMAN Immunoglobulin kappa variable 1-5 OS=Homo sapiens OX=9606 GN=IGKV1-5 PE=1 SV=2	30.1229	28.1228	28.1228	2	2	2	2	24.8	24.8	24.8	12.781	0	27.046	1169200000	9	117	117	1	2	2	2	24.8	P01602	P01602	2	2	True;True
Ig kappa chain V-III region B6		sp|P01619|KV320_HUMAN Immunoglobulin kappa variable 3-20 OS=Homo sapiens OX=9606 GN=IGKV3-20 PE=1 SV=2	33.4141	31.0921	31.0921	2	5	5	2	46.6	46.6	26.7	12.557	0	129.07	11446000000	25	116	116	1	5	5	2	46.6	P01619	P01619	5	5	True;True;True;True;True
Ig kappa chain V-III region POM	IGKV3OR2-268;IGKV3-7;IGKV3D-7	sp|P01624|KV315_HUMAN Immunoglobulin kappa variable 3-15 OS=Homo sapiens OX=9606 GN=IGKV3-15 PE=1 SV=2;tr|A0A0C4DH90|A0A0C4DH90_HUMAN Immunoglobulin kappa variable 3/OR2-268 (non-functional) (Fragment) OS=Homo sapiens OX=9606 GN=IGKV3OR2-268 PE=4 SV=5;tr|A	31.4092	29.8242	29.8242	1	2	1	1	26.1	7.8	7.8	12.496	0.012766	5.6791	2851700000	3		115	4				26.1	P01624;A0A0C4DH90;A0A075B6H7;A0A0C4DH55	P01624;A0A0C4DH90;A0A075B6H7;A0A0C4DH55	2	1	False;True
Ig lambda chain V-I region VOR		sp|P01699|LV144_HUMAN Immunoglobulin lambda variable 1-44 OS=Homo sapiens OX=9606 GN=IGLV1-44 PE=1 SV=2	27.5561	26.5561	26.5561	1	2	1	1	38.5	24.8	24.8	12.201	0	32.543	197340000	6	117	117	1	2	1	1	38.5	P01699	P01699	2	1	False;True
Ig lambda chain V-I region HA		sp|P01700|LV147_HUMAN Immunoglobulin lambda variable 1-47 OS=Homo sapiens OX=9606 GN=IGLV1-47 PE=1 SV=2	31.217	29.217	29.217	2	3	3	2	49.6	49.6	35.9	12.283	0	36.823	2496100000	16	117	117	1	3	3	2	49.6	P01700	P01700	3	3	True;True;True
Ig lambda chain V-I region NEW		sp|P01701|LV151_HUMAN Immunoglobulin lambda variable 1-51 OS=Homo sapiens OX=9606 GN=IGLV1-51 PE=1 SV=2	26.4364	24.8514	24.8514	2	2	2	2	31.6	31.6	31.6	12.249	0	38.767	90814000	4	117	117	1	2	2	2	31.6	P01701	P01701	2	2	True;True
Ig lambda chain V-I region NEWM		sp|P01703|LV140_HUMAN Immunoglobulin lambda variable 1-40 OS=Homo sapiens OX=9606 GN=IGLV1-40 PE=1 SV=2	29.9829	28.983	28.983	2	2	2	2	39	39	39	12.301	0	52.531	1061100000	6	118	118	1	2	2	2	39	P01703	P01703	2	2	True;True
Ig lambda chain V-II region TOG		sp|P01704|LV214_HUMAN Immunoglobulin lambda variable 2-14 OS=Homo sapiens OX=9606 GN=IGLV2-14 PE=1 SV=2	27.0031	27.0031	27.0031	1	1	1	1	13.3	13.3	13.3	12.597	0	6.1739	134510000	2	120	120	1	1	1	1	13.3	P01704	P01704	1	1	TRUE
Ig lambda chain V-II region BOH		sp|P01706|LV211_HUMAN Immunoglobulin lambda variable 2-11 OS=Homo sapiens OX=9606 GN=IGLV2-11 PE=1 SV=2	28.7877	27.2028	27.2028	3	3	3	3	39.5	39.5	39.5	12.644	0	174.37	463410000	11	119	119	1	3	3	3	39.5	P01706	P01706	3	3	True;True;True
Ig lambda chain V-II region MGC		sp|P01709|LV208_HUMAN Immunoglobulin lambda variable 2-8 OS=Homo sapiens OX=9606 GN=IGLV2-8 PE=1 SV=2	26.5281	25.5281	25.5281	1	1	1	1	6.8	6.8	6.8	12.382	0.0046296	6.0046	96770000	2	118	118	1	1	1	1	6.8	P01709	P01709	1	1	TRUE
Ig lambda chain V-III region SH		sp|P01714|LV319_HUMAN Immunoglobulin lambda variable 3-19 OS=Homo sapiens OX=9606 GN=IGLV3-19 PE=1 SV=2	32.4599	30.4598	30.4598	4	4	4	4	63.4	63.4	63.4	12.042	0	139.5	5907300000	16	112	112	1	4	4	4	63.4	P01714	P01714	4	4	True;True;True;True
Ig lambda chain V-IV region Bau		sp|P01715|LV301_HUMAN Immunoglobulin lambda variable 3-1 OS=Homo sapiens OX=9606 GN=IGLV3-1 PE=1 SV=2	26.7021	25.7022	25.7022	1	2	1	1	26.1	19.1	19.1	12.296	0	21.675	109180000	3	115	115	1	2	1	1	26.1	P01715	P01715	2	1	False;True
Ig lambda chain V-IV region Hil		sp|P01717|LV325_HUMAN Immunoglobulin lambda variable 3-25 OS=Homo sapiens OX=9606 GN=IGLV3-25 PE=1 SV=2	29.2422	27.6573	27.6573	1	3	2	1	36.6	27.7	27.7	12.011	0	16.943	635030000	7		112	2				36.6	P01717;A0A075B6K0	P01717	3	2	True;False;True
Ig lambda chain V-IV region Kern		sp|P01718|LV327_HUMAN Immunoglobulin lambda variable 3-27 OS=Homo sapiens OX=9606 GN=IGLV3-27 PE=1 SV=2	26.814	25.2291	25.2291	1	2	1	1	18.6	8.8	8.8	12.165	0	7.507	117980000	3	113	113	1	2	1	1	18.6	P01718	P01718	2	1	False;True
Ig lambda chain V-VI region AR		sp|P01721|LV657_HUMAN Immunoglobulin lambda variable 6-57 OS=Homo sapiens OX=9606 GN=IGLV6-57 PE=1 SV=2	24.7549	23.7548	23.7548	1	1	1	1	17.1	17.1	17.1	12.566	0	54.75	28311000	2	117	117	1	1	1	1	17.1	P01721	P01721	1	1	TRUE
Ig heavy chain V-III region WEA		sp|P01763|HV348_HUMAN Immunoglobulin heavy variable 3-48 OS=Homo sapiens OX=9606 GN=IGHV3-48 PE=1 SV=2	24.1111	22.1111	22.1111	1	3	1	1	35	16.2	16.2	12.812	0.0087336	5.7389	18120000	1	117	117	1	3	1	1	35	P01763	P01763	3	1	False;True;False
Ig heavy chain V-III region 23	IGHV3-23	sp|P01764|HV323_HUMAN Immunoglobulin heavy variable 3-23 OS=Homo sapiens OX=9606 GN=IGHV3-23 PE=1 SV=2	31.5146	28.9296	28.9296	2	7	4	2	61.5	57.3	35	12.582	0	79.573	3067800000	24	117	117	1	7	4	2	61.5	P01764	P01764	7	4	True;False;True;False;True;True;False
Ig heavy chain V-III region BRO		sp|P01766|HV313_HUMAN Immunoglobulin heavy variable 3-13 OS=Homo sapiens OX=9606 GN=IGHV3-13 PE=1 SV=2	27.8454	25.8454	25.8454	1	2	1	1	19	9.5	9.5	12.506	0	22.929	241160000	3	116	116	1	2	1	1	19	P01766	P01766	2	1	True;False
Ig heavy chain V-III region BUT	IGHV3-66	sp|P01767|HV353_HUMAN Immunoglobulin heavy variable 3-53 OS=Homo sapiens OX=9606 GN=IGHV3-53 PE=1 SV=2;sp|A0A0C4DH42|HV366_HUMAN Immunoglobulin heavy variable 3-66 OS=Homo sapiens OX=9606 GN=IGHV3-66 PE=3 SV=1;sp|P0DP02|HVC33_HUMAN Immunoglobulin heavy var	34.1718	31.5868	31.5868	3	9	9	3	65.5	65.5	38.8	12.769	0	288.25	19352000000	72		116	3				65.5	P01767;A0A0C4DH42;P0DP02	P01767;A0A0C4DH42;P0DP02	9	9	True;True;True;True;True;True;True;True;True
Ig heavy chain V-III region KOL		sp|P01772|HV333_HUMAN Immunoglobulin heavy variable 3-33 OS=Homo sapiens OX=9606 GN=IGHV3-33 PE=1 SV=2	27.5249	24.7175	24.7175	0	7	1	0	42.7	16.2	0	13.074	0	24.993	193120000	5	117	117	1	7	1	0	42.7	P01772	P01772	7	1	False;False;False;False;True;False;False
Ig heavy chain V-III region JON		sp|P01780|HV307_HUMAN Immunoglobulin heavy variable 3-7 OS=Homo sapiens OX=9606 GN=IGHV3-7 PE=1 SV=2	27.4275	25.1055	25.1055	2	4	2	2	31.6	12.8	12.8	12.943	0	13.367	180510000	4	117	117	1	4	2	2	31.6	P01780	P01780	4	2	False;True;True;False
Polymeric immunoglobulin receptor;Secretory component	PIGR	sp|P01833|PIGR_HUMAN Polymeric immunoglobulin receptor OS=Homo sapiens OX=9606 GN=PIGR PE=1 SV=4	23.7617	18.4398	18.4398	2	2	2	2	4.2	4.2	4.2	83.283	0	12.281	14223000	2	764	764	1	2	2	2	4.2	P01833	P01833	2	2	True;True
Ig kappa chain C region	IGKC	sp|P01834|IGKC_HUMAN Immunoglobulin kappa constant OS=Homo sapiens OX=9606 GN=IGKC PE=1 SV=2	37.5754	35.2534	35.2534	16	16	16	16	97.2	97.2	97.2	11.765	0	323.31	204790000000	361	107	107	1	16	16	16	97.2	P01834	P01834	16	16	True;True;True;True;True;True;True;True;True;True;True;True;True;True;True;True
Ig mu chain C region	IGHM	sp|P01871|IGHM_HUMAN Immunoglobulin heavy constant mu OS=Homo sapiens OX=9606 GN=IGHM PE=1 SV=4;tr|A0A1B0GUU9|A0A1B0GUU9_HUMAN Immunoglobulin heavy constant mu (Fragment) OS=Homo sapiens OX=9606 GN=IGHM PE=1 SV=1	32.1983	27.5544	27.5544	21	21	21	21	55.6	55.6	55.6	49.439	0	323.31	4927700000	76		453	2				55.6	P01871;A0A1B0GUU9	P01871;A0A1B0GUU9	21	21	True;True;True;True;True;True;True;True;True;True;True;True;True;True;True;True;True;True;True;True;True
Ig alpha-1 chain C region	IGHA1	sp|P01876|IGHA1_HUMAN Immunoglobulin heavy constant alpha 1 OS=Homo sapiens OX=9606 GN=IGHA1 PE=1 SV=2;tr|A0A286YEY1|A0A286YEY1_HUMAN Immunoglobulin heavy constant alpha 1 (Fragment) OS=Homo sapiens OX=9606 GN=IGHA1 PE=1 SV=1	35.0434	31.1365	31.1365	7	20	20	7	66	66	27.8	37.654	0	323.31	35408000000	143		353	2				66	P01876;A0A286YEY1	P01876;A0A286YEY1	20	20	True;True;True;True;True;True;True;True;True;True;True;True;True;True;True;True;True;True;True;True
Spectrin alpha chain, erythrocytic 1	SPTA1	sp|P02549|SPTA1_HUMAN Spectrin alpha chain, erythrocytic 1 OS=Homo sapiens OX=9606 GN=SPTA1 PE=1 SV=5				1	1	1	1	0.6	0.6	0.6	280.01	0.083624	5.3262	0	1	2419	2419	1	1	1	1	0.6	P02549	P02549	1	1	TRUE
Apolipoprotein A-I;Proapolipoprotein A-I;Truncated apolipoprotein A-I	APOA1	sp|P02647|APOA1_HUMAN Apolipoprotein A-I OS=Homo sapiens OX=9606 GN=APOA1 PE=1 SV=1;tr|F8W696|F8W696_HUMAN Apolipoprotein A-I OS=Homo sapiens OX=9606 GN=APOA1 PE=1 SV=1	34.3137	30.1437	30.1437	34	34	34	34	79	79	79	30.777	0	323.31	21352000000	120		267	3				79	P02647;F8W696;CON__P15497	P02647;F8W696	34	34	True;True;True;True;True;True;True;True;True;True;True;True;True;True;True;True;True;True;True;True;True;True;True;True;True;True;True;True;True;True;True;True;True;True
Apolipoprotein E	APOE	sp|P02649|APOE_HUMAN Apolipoprotein E OS=Homo sapiens OX=9606 GN=APOE PE=1 SV=1	26.8466	22.3872	22.3872	7	7	7	7	26.5	26.5	26.5	36.154	0	93.893	120680000	10		317	5				26.5	P02649;H0Y7L5;E9PEV4;E7ERP7;CON__Q03247	P02649	7	7	True;True;True;True;True;True;True
Apolipoprotein A-II;Proapolipoprotein A-II;Truncated apolipoprotein A-II	APOA2	tr|V9GYM3|V9GYM3_HUMAN Apolipoprotein A-II OS=Homo sapiens OX=9606 GN=APOA2 PE=1 SV=1;sp|P02652|APOA2_HUMAN Apolipoprotein A-II OS=Homo sapiens OX=9606 GN=APOA2 PE=1 SV=1;tr|V9GYE3|V9GYE3_HUMAN Apolipoprotein A-II OS=Homo sapiens OX=9606 GN=APOA2 PE=1 SV=1	31.788	28.788	28.788	10	10	10	10	51.9	51.9	51.9	14.914	0	323.31	3708000000	28		133	6				51.9	V9GYM3;P02652;V9GYE3;V9GYG9;V9GYC1;V9GYS1	V9GYM3;P02652;V9GYE3;V9GYG9	10	10	True;True;True;True;True;True;True;True;True;True
Fibrinogen alpha chain;Fibrinopeptide A;Fibrinogen alpha chain	FGA	sp|P02671|FIBA_HUMAN Fibrinogen alpha chain OS=Homo sapiens OX=9606 GN=FGA PE=1 SV=2	31.6652	26.5359	26.5359	25	25	25	25	31.2	31.2	31.2	94.972	0	323.31	3405400000	92		866	2				31.2	P02671;A0A087WUA0	P02671	25	25	True;True;True;True;True;True;True;True;True;True;True;True;True;True;True;True;True;True;True;True;True;True;True;True;True
Fibrinogen beta chain;Fibrinopeptide B;Fibrinogen beta chain	FGB	sp|P02675|FIBB_HUMAN Fibrinogen beta chain OS=Homo sapiens OX=9606 GN=FGB PE=1 SV=2	28.1332	23.2753	23.2753	6	6	6	6	25.3	25.3	25.3	55.928	0	56.116	294400000	13		491	2				25.3	P02675;D6REL8	P02675	6	6	True;True;True;True;True;True
Serum amyloid P-component;Serum amyloid P-component(1-203)	APCS	sp|P02743|SAMP_HUMAN Serum amyloid P-component OS=Homo sapiens OX=9606 GN=APCS PE=1 SV=2	23.8964	20.5745	20.5745	2	2	2	2	10.3	10.3	10.3	25.387	0	11.244	15615000	3	223	223	1	2	2	2	10.3	P02743	P02743	2	2	True;True
Complement C1q subcomponent subunit A	C1QA	sp|P02745|C1QA_HUMAN Complement C1q subcomponent subunit A OS=Homo sapiens OX=9606 GN=C1QA PE=1 SV=2	27.5354	23.835	23.835	3	3	3	3	13.9	13.9	13.9	26.016	0	44.682	194530000	5		245	2				13.9	P02745;X6RLJ0	P02745	3	3	True;True;True
Complement C1q subcomponent subunit C	C1QC	sp|P02747|C1QC_HUMAN Complement C1q subcomponent subunit C OS=Homo sapiens OX=9606 GN=C1QC PE=1 SV=3	27.9271	24.2267	24.2267	4	4	4	4	21.2	21.2	21.2	25.773	0	69.048	255210000	9	245	245	1	4	4	4	21.2	P02747	P02747	4	4	True;True;True;True
Complement component C9;Complement component C9a;Complement component C9b	C9	sp|P02748|CO9_HUMAN Complement component C9 OS=Homo sapiens OX=9606 GN=C9 PE=1 SV=2	22.7072	18.0067	18.0067	1	1	1	1	2.1	2.1	2.1	63.173	0.051383	5.4792	6847700	1	559	559	1	1	1	1	2.1	P02748	P02748	1	1	TRUE
Beta-2-glycoprotein 1	APOH	sp|P02749|APOH_HUMAN Beta-2-glycoprotein 1 OS=Homo sapiens OX=9606 GN=APOH PE=1 SV=3;tr|J3QLI0|J3QLI0_HUMAN Beta-2-glycoprotein 1 (Fragment) OS=Homo sapiens OX=9606 GN=APOH PE=1 SV=1	31.7831	27.6956	27.6956	20	20	20	20	68.4	68.4	68.4	38.298	0	323.31	3695500000	57		345	5				68.4	P02749;J3QLI0;J3QRN2;J3KS17;CON__P17690	P02749;J3QLI0	20	20	True;True;True;True;True;True;True;True;True;True;True;True;True;True;True;True;True;True;True;True
Leucine-rich alpha-2-glycoprotein	LRG1	sp|P02750|A2GL_HUMAN Leucine-rich alpha-2-glycoprotein OS=Homo sapiens OX=9606 GN=LRG1 PE=1 SV=2	25.0093	20.9219	20.9219	2	2	2	2	10.4	10.4	10.4	38.177	0	11.707	33772000	3	347	347	1	2	2	2	10.4	P02750	P02750	2	2	True;True
Fibronectin;Anastellin;Ugl-Y1;Ugl-Y2;Ugl-Y3	FN1	sp|P02751|FINC_HUMAN Fibronectin OS=Homo sapiens OX=9606 GN=FN1 PE=1 SV=4	24.5993	18.0143	18.0143	3	3	3	3	1.8	1.8	1.8	262.62	0	24.165	25417000	6		2386	2				1.8	P02751;H0Y7Z1	P02751	3	3	True;True;True
Retinol-binding protein 4;Plasma retinol-binding protein(1-182);Plasma retinol-binding protein(1-181);Plasma retinol-binding protein(1-179);Plasma retinol-binding protein(1-176)	RBP4	tr|Q5VY30|Q5VY30_HUMAN Retinol-binding protein OS=Homo sapiens OX=9606 GN=RBP4 PE=1 SV=2;sp|P02753|RET4_HUMAN Retinol-binding protein 4 OS=Homo sapiens OX=9606 GN=RBP4 PE=1 SV=3	24.9827	21.6608	21.6608	3	3	3	3	15.6	15.6	15.6	22.974	0	17.894	33154000	3		199	2				15.6	Q5VY30;P02753	Q5VY30;P02753	3	3	True;True;True
Protein AMBP;Alpha-1-microglobulin;Inter-alpha-trypsin inhibitor light chain;Trypstatin	AMBP	sp|P02760|AMBP_HUMAN Protein AMBP OS=Homo sapiens OX=9606 GN=AMBP PE=1 SV=1;tr|S4R3Y4|S4R3Y4_HUMAN Protein AMBP OS=Homo sapiens OX=9606 GN=AMBP PE=1 SV=1	29.2811	25.2811	25.2811	13	13	13	13	34.4	34.4	34.4	38.999	0	108.72	652360000	27		352	3				34.4	P02760;S4R3Y4;S4R471	P02760;S4R3Y4	13	13	True;True;True;True;True;True;True;True;True;True;True;True;True
Alpha-1-acid glycoprotein 1	ORM1	sp|P02763|A1AG1_HUMAN Alpha-1-acid glycoprotein 1 OS=Homo sapiens OX=9606 GN=ORM1 PE=1 SV=1	32.7333	29.4113	29.4113	7	14	14	7	51.2	51.2	32.8	23.511	0	163.02	7140000000	54	201	201	1	14	14	7	51.2	P02763	P02763	14	14	True;True;True;True;True;True;True;True;True;True;True;True;True;True
Transthyretin	TTR	sp|P02766|TTHY_HUMAN Transthyretin OS=Homo sapiens OX=9606 GN=TTR PE=1 SV=1;tr|A0A087WV45|A0A087WV45_HUMAN Transthyretin OS=Homo sapiens OX=9606 GN=TTR PE=1 SV=1;tr|A0A087WT59|A0A087WT59_HUMAN Transthyretin OS=Homo sapiens OX=9606 GN=TTR PE=1 SV=1	30.6087	28.0237	28.0237	8	8	8	8	69.4	69.4	69.4	15.887	0	250.85	1637300000	25		147	3				69.4	P02766;A0A087WV45;A0A087WT59	P02766;A0A087WV45;A0A087WT59	8	8	True;True;True;True;True;True;True;True
Serotransferrin	TF	sp|P02787|TRFE_HUMAN Serotransferrin OS=Homo sapiens OX=9606 GN=TF PE=1 SV=3	32.7911	27.4692	27.4692	54	54	54	54	65.2	65.2	65.2	77.063	0	323.31	7431900000	155		698	10				65.2	P02787;C9JVG0;H7C5E8;F8WEK9;F8WCI6;C9JB55;CON__Q29443;CON__Q0IIK2;F8WC57;CON__Q2HJF0	P02787	54	54	True;True;True;True;True;True;True;True;True;True;True;True;True;True;True;True;True;True;True;True;True;True;True;True;True;True;True;True;True;True;True;True;True;True;True;True;True;True;True;True;True;True;True;True;True;True;True;True;True;True;True;True;True;True
Hemopexin	HPX	sp|P02790|HEMO_HUMAN Hemopexin OS=Homo sapiens OX=9606 GN=HPX PE=1 SV=2	32.1852	27.7258	27.7258	24	24	24	24	60.6	60.6	60.6	51.676	0	323.31	4883400000	86		462	2				60.6	P02790;Q9BS19	P02790	24	24	True;True;True;True;True;True;True;True;True;True;True;True;True;True;True;True;True;True;True;True;True;True;True;True
Angiogenin	ANG	sp|P03950|ANGI_HUMAN Angiogenin OS=Homo sapiens OX=9606 GN=ANG PE=1 SV=1	24.9418	21.9418	21.9418	3	3	3	3	27.9	27.9	27.9	16.55	0	17.358	32227000	2	147	147	1	3	3	3	27.9	P03950	P03950	3	3	True;True;True
Antileukoproteinase	SLPI	sp|P03973|SLPI_HUMAN Antileukoproteinase OS=Homo sapiens OX=9606 GN=SLPI PE=1 SV=2	23.8264	20.8264	20.8264	2	2	2	2	20.5	20.5	20.5	14.326	0	12.232	14875000	2	132	132	1	2	2	2	20.5	P03973	P03973	2	2	True;True
Vitronectin;Vitronectin V65 subunit;Vitronectin V10 subunit;Somatomedin-B	VTN	sp|P04004|VTNC_HUMAN Vitronectin OS=Homo sapiens OX=9606 GN=VTN PE=1 SV=1	28.6848	24.4368	24.4368	6	6	6	6	16.5	16.5	16.5	54.305	0	76.141	431490000	21		478	3				16.5	P04004;F5GX75;CON__Q3ZBS7	P04004	6	6	True;True;True;True;True;True
Histidine-rich glycoprotein	HRG	sp|P04196|HRG_HUMAN Histidine-rich glycoprotein OS=Homo sapiens OX=9606 GN=HRG PE=1 SV=1	27.0169	22.5574	22.5574	7	7	7	7	16.2	16.2	16.2	59.578	0	44.011	135800000	10	525	525	1	7	7	7	16.2	P04196	P04196	7	7	True;True;True;True;True;True;True
Alpha-1B-glycoprotein	A1BG	sp|P04217|A1BG_HUMAN Alpha-1B-glycoprotein OS=Homo sapiens OX=9606 GN=A1BG PE=1 SV=4	28.8517	24.9448	24.9448	11	11	11	11	40	40	40	54.253	0	144.14	484440000	23		495	2				40	P04217;M0R009	P04217	11	11	True;True;True;True;True;True;True;True;True;True;True
Ig kappa chain V-I region BAN		sp|P04430|KV116_HUMAN Immunoglobulin kappa variable 1-16 OS=Homo sapiens OX=9606 GN=IGKV1-16 PE=1 SV=2	28.4817	26.4817	26.4817	2	2	2	2	29.1	29.1	29.1	12.618	0	106.25	374840000	11	117	117	1	2	2	2	29.1	P04430	P04430	2	2	True;True
Ig kappa chain V-III region VG	IGKV3D-11	sp|P04433|KV311_HUMAN Immunoglobulin kappa variable 3-11 OS=Homo sapiens OX=9606 GN=IGKV3-11 PE=1 SV=1;sp|A0A0A0MRZ8|KVD11_HUMAN Immunoglobulin kappa variable 3D-11 OS=Homo sapiens OX=9606 GN=IGKV3D-11 PE=3 SV=6	31.8337	29.8337	29.8337	3	3	3	3	52.2	52.2	52.2	12.575	0	110.15	3827400000	10		115	2				52.2	P04433;A0A0A0MRZ8	P04433;A0A0A0MRZ8	3	3	True;True;True
Histone H2A type 1-B/E;Histone H2A type 3;Histone H2A type 1-C;Histone H2A type 2-A;Histone H2A type 1-J;Histone H2A type 1;Histone H2A type 1-D;Histone H2A type 1-H;Histone H2A type 2-C;Histone H2A.J	HIST1H2AB;HIST3H2A;HIST1H2AC;HIST2H2AA3;HIST1H2AJ;HIST1H2AG;HIST1H2AD;HIST1H2AH;HIST2H2AC;H2AFJ	sp|P04908|H2A1B_HUMAN Histone H2A type 1-B/E OS=Homo sapiens OX=9606 GN=HIST1H2AB PE=1 SV=2;sp|Q7L7L0|H2A3_HUMAN Histone H2A type 3 OS=Homo sapiens OX=9606 GN=HIST3H2A PE=1 SV=3;sp|Q93077|H2A1C_HUMAN Histone H2A type 1-C OS=Homo sapiens OX=9606 GN=HIST1H2A	27.8827	25.5607	25.5607	3	3	3	3	30	30	30	14.135	0	44.238	247470000	6		130	21				30	P04908;Q7L7L0;Q93077;Q6FI13;Q99878;A0A0U1RR32;A0A0U1RRH7;P0C0S8;P20671;Q96KK5;Q16777;Q9BTM1;A0A3B3IS11;A0A494C189;H0YFX9;Q71UI9;C9J0D1;Q96QV6;P0C0S5;P16104;Q8IUE6	P04908;Q7L7L0;Q93077;Q6FI13;Q99878;A0A0U1RR32;A0A0U1RRH7;P0C0S8;P20671;Q96KK5;Q16777;Q9BTM1	3	3	True;True;True
Protein S100-A8;Protein S100-A8, N-terminally processed	S100A8	sp|P05109|S10A8_HUMAN Protein S100-A8 OS=Homo sapiens OX=9606 GN=S100A8 PE=1 SV=1	24.6134	21.6134	21.6134	2	2	2	2	20.4	20.4	20.4	10.834	0	10.911	25667000	3	93	93	1	2	2	2	20.4	P05109	P05109	2	2	True;True
Cholecystokinin;Cholecystokinin-58;Cholecystokinin-58 desnonopeptide;Cholecystokinin-39;Cholecystokinin-33;Cholecystokinin-25;Cholecystokinin-18;Cholecystokinin-12;Cholecystokinin-8;Cholecystokinin-7;Cholecystokinin-5	CCK	sp|P06307|CCKN_HUMAN Cholecystokinin OS=Homo sapiens OX=9606 GN=CCK PE=1 SV=1	24.5391	22.5391	22.5391	1	1	1	1	8.7	8.7	8.7	12.669	0	6.1734	24379000	2	115	115	1	1	1	1	8.7	P06307	P06307	1	1	TRUE
Ig kappa chain V-II region RPMI 6410	IGKV2D-30	sp|P06310|KV230_HUMAN Immunoglobulin kappa variable 2-30 OS=Homo sapiens OX=9606 GN=IGKV2-30 PE=3 SV=2;sp|A0A075B6S6|KVD30_HUMAN Immunoglobulin kappa variable 2D-30 OS=Homo sapiens OX=9606 GN=IGKV2D-30 PE=3 SV=1	28.4376	26.4376	26.4376	2	3	2	2	38.3	38.3	38.3	13.185	0	24.207	363560000	8		120	2				38.3	P06310;A0A075B6S6	P06310;A0A075B6S6	3	2	True;False;True
Ig kappa chain V-IV region	IGKV4-1	sp|P06312|KV401_HUMAN Immunoglobulin kappa variable 4-1 OS=Homo sapiens OX=9606 GN=IGKV4-1 PE=1 SV=1	30.7857	28.7857	28.7857	3	3	3	3	29.8	29.8	29.8	13.38	0	156.34	1851100000	17	121	121	1	3	3	3	29.8	P06312	P06312	3	3	True;True;True
Ig heavy chain V-II region ARH-77;Ig heavy chain V-II region NEWM;Ig heavy chain V-II region WAH	IGHV4-61	sp|P06331|HV434_HUMAN Immunoglobulin heavy variable 4-34 OS=Homo sapiens OX=9606 GN=IGHV4-34 PE=1 SV=2;sp|P0DP08|HVD82_HUMAN Immunoglobulin heavy variable 4-38-2 OS=Homo sapiens OX=9606 GN=IGHV4-38-2 PE=3 SV=1;sp|P0DP06|HVD34_HUMAN Immunoglobulin heavy var	29.8892	27.8891	27.8891	4	4	4	4	39	39	39	13.815	0	114.8	994330000	12		123	11				39	P06331;P0DP08;P0DP06;A0A0C4DH41;P01825;P01824;A0A0J9YWU9;A0A087WW49;A0A075B6R2;P0DP07;A0A087WSY4	P06331;P0DP08;P0DP06;A0A0C4DH41;P01825;P01824;A0A0J9YWU9	4	4	True;True;True;True
Protein S100-A9	S100A9	sp|P06702|S10A9_HUMAN Protein S100-A9 OS=Homo sapiens OX=9606 GN=S100A9 PE=1 SV=1	27.8518	25.0445	25.0445	3	3	3	3	31.6	31.6	31.6	13.242	0	54.807	242230000	15	114	114	1	3	3	3	31.6	P06702	P06702	3	3	True;True;True
Apolipoprotein A-IV	APOA4	sp|P06727|APOA4_HUMAN Apolipoprotein A-IV OS=Homo sapiens OX=9606 GN=APOA4 PE=1 SV=3	30.404	25.7601	25.7601	21	21	21	21	57.8	57.8	57.8	45.398	0	284.68	1420700000	55		396	2				57.8	P06727;CON__Q32PJ2	P06727	21	21	True;True;True;True;True;True;True;True;True;True;True;True;True;True;True;True;True;True;True;True;True
Matrix Gla protein	MGP	sp|P08493|MGP_HUMAN Matrix Gla protein OS=Homo sapiens OX=9606 GN=MGP PE=1 SV=2	28.297	26.297	26.297	2	2	2	2	23.3	23.3	23.3	12.353	0	46.006	329790000	9	103	103	1	2	2	2	23.3	P08493	P08493	2	2	True;True
Complement factor H	CFH	sp|P08603|CFAH_HUMAN Complement factor H OS=Homo sapiens OX=9606 GN=CFH PE=1 SV=4;tr|A0A0D9SG88|A0A0D9SG88_HUMAN Complement factor H OS=Homo sapiens OX=9606 GN=CFH PE=1 SV=1;tr|Q5TFM2|Q5TFM2_HUMAN Complement factor H OS=Homo sapiens OX=9606 GN=CFH PE=1 SV=	26.3961	20.4654	20.4654	6	8	6	6	10.4	6.3	6.3	139.09	0	41.519	88315000	6		1231	6				10.4	P08603;A0A0D9SG88;Q5TFM2;A0A087WYK9;Q6NSD3;Q02985	P08603;A0A0D9SG88;Q5TFM2	8	6	False;False;True;True;True;True;True;True
Complement C4-B;Complement C4 beta chain;Complement C4-B alpha chain;C4a anaphylatoxin;C4b-B;C4d-B;Complement C4 gamma chain;Complement C4-A;Complement C4 beta chain;Complement C4-A alpha chain;C4a anaphylatoxin;C4b-A;C4d-A;Complement C4 gamma chain	C4B;C4A	sp|P0C0L5|CO4B_HUMAN Complement C4-B OS=Homo sapiens OX=9606 GN=C4B PE=1 SV=2;tr|F5GXS0|F5GXS0_HUMAN Complement C4-B OS=Homo sapiens OX=9606 GN=C4B PE=1 SV=1;tr|A0A140TA29|A0A140TA29_HUMAN Complement C4-B OS=Homo sapiens OX=9606 GN=C4B PE=1 SV=1;tr|A0A0G2J	31.5885	25.2665	25.2665	55	55	55	55	41.9	41.9	41.9	192.75	0	323.31	3229100000	96		1744	13				41.9	P0C0L5;F5GXS0;A0A140TA29;A0A0G2JL54;A0A140TA44;A0A140TA32;A0A0G2JPR0;P0C0L4;A0A140TA49;A0A3B3ISA6;CON__P01030;CON__ENSEMBL:ENSBTAP00000007350;A0A3B3ISD7	P0C0L5;F5GXS0;A0A140TA29;A0A0G2JL54;A0A140TA44;A0A140TA32;A0A0G2JPR0;P0C0L4;A0A140TA49;A0A3B3ISA6	55	55	True;True;True;True;True;True;True;True;True;True;True;True;True;True;True;True;True;True;True;True;True;True;True;True;True;True;True;True;True;True;True;True;True;True;True;True;True;True;True;True;True;True;True;True;True;True;True;True;True;True;True;True;True;True;True
Serum amyloid A-1 protein;Amyloid protein A;Serum amyloid protein A(2-104);Serum amyloid protein A(3-104);Serum amyloid protein A(2-103);Serum amyloid protein A(2-102);Serum amyloid protein A(4-101);Serum amyloid A protein	SAA1	sp|P0DJI8|SAA1_HUMAN Serum amyloid A-1 protein OS=Homo sapiens OX=9606 GN=SAA1 PE=1 SV=1;tr|E9PQD6|E9PQD6_HUMAN Serum amyloid A protein OS=Homo sapiens OX=9606 GN=SAA1 PE=1 SV=1	29.5373	26.73	26.73	3	6	3	3	70.5	47.5	47.5	13.532	0	56.18	779140000	10		122	2				70.5	P0DJI8;E9PQD6	P0DJI8;E9PQD6	6	3	False;False;True;True;False;True
Serum amyloid A-2 protein	SAA2	sp|P0DJI9|SAA2_HUMAN Serum amyloid A-2 protein OS=Homo sapiens OX=9606 GN=SAA2 PE=1 SV=1	29.1788	26.3714	26.3714	3	6	3	3	50	27	27	13.527	0	21.622	607690000	8	122	122	1	6	3	3	50	P0DJI9	P0DJI9	6	3	False;False;True;True;False;True
		sp|P0DOY2|IGLC2_HUMAN Immunoglobulin lambda constant 2 OS=Homo sapiens OX=9606 GN=IGLC2 PE=1 SV=1	27.7022	24.8949	24.8949	0	13	2	0	96.2	31.1	0	11.293	0	24.932	218370000	8	106	106	1	13	2	0	96.2	P0DOY2	P0DOY2	13	2	False;False;False;False;False;False;False;True;False;False;False;False;True
		sp|P0DOY3|IGLC3_HUMAN Immunoglobulin lambda constant 3 OS=Homo sapiens OX=9606 GN=IGLC3 PE=1 SV=1	37.1889	34.3815	34.3815	3	14	14	3	96.2	96.2	38.7	11.265	0	323.31	156660000000	165	106	106	1	14	14	3	96.2	P0DOY3	P0DOY3	14	14	True;True;True;True;True;True;True;True;True;True;True;True;True;True
Ig heavy chain V-III region DOB		sp|P0DP04|HV43D_HUMAN Immunoglobulin heavy variable 3-43D OS=Homo sapiens OX=9606 GN=IGHV3-43D PE=3 SV=1;sp|P01782|HV309_HUMAN Immunoglobulin heavy variable 3-9 OS=Homo sapiens OX=9606 GN=IGHV3-9 PE=1 SV=2	33.1501	30.5651	30.5651	3	6	5	3	42.4	38.1	34.7	13.017	0	83.354	9531600000	63		118	2				42.4	P0DP04;P01782	P0DP04;P01782	6	5	True;True;False;True;True;True
		P1_A2601	30.9664	26.6446	26.6446	7	23	7	7	61.6	20	20	41.061	0	139.21	2098100000	27	365	365	1	23	7	7	61.6	P1_A2601	P1_A2601	23	7	True;False;True;False;False;False;False;False;False;False;True;True;False;False;False;True;False;True;True;False;False;False;False
		P1_A6801	34.9619	30.714	30.714	11	27	27	11	69.3	69.3	27.1	40.908	0	323.31	33465000000	152	365	365	1	27	27	11	69.3	P1_A6801	P1_A6801	27	27	True;True;True;True;True;True;True;True;True;True;True;True;True;True;True;True;True;True;True;True;True;True;True;True;True;True;True
		P1_B3801	33.8712	29.7012	29.7012	8	26	19	8	69.6	57.7	25.1	40.416	0	322.46	15712000000	95	362	362	1	26	19	8	69.6	P1_B3801	P1_B3801	26	19	True;False;True;True;True;True;True;True;True;True;True;True;True;True;False;False;True;True;True;True;True;True;False;False;False;False
		P1_B5001	32.0693	27.9818	27.9818	9	22	9	9	67.4	31.8	31.8	40.541	0	128.67	4506200000	57	362	362	1	22	9	9	67.4	P1_B5001	P1_B5001	22	9	False;False;True;True;False;False;False;True;True;True;False;True;True;True;False;False;False;False;False;True;False;False
		P1_C0602	33.8734	29.8734	29.8734	3	25	15	3	65.8	40.7	6.8	40.968	0	323.31	15737000000	70	366	366	1	25	15	3	65.8	P1_C0602	P1_C0602	25	15	True;True;False;False;False;False;True;False;True;False;True;True;True;True;True;False;False;True;True;True;False;True;True;False;True
		P1_C1203	30.5045	26.5045	26.5045	3	25	3	3	63.1	10.4	10.4	40.915	0	28.877	1523200000	9	366	366	1	25	3	3	63.1	P1_C1203	P1_C1203	25	3	False;False;False;False;False;False;False;False;False;False;True;False;False;False;False;False;False;False;False;False;False;True;True;False;False
Clusterin;Clusterin beta chain;Clusterin alpha chain;Clusterin	CLU	sp|P10909|CLUS_HUMAN Clusterin OS=Homo sapiens OX=9606 GN=CLU PE=1 SV=1;tr|H0YC35|H0YC35_HUMAN Clusterin (Fragment) OS=Homo sapiens OX=9606 GN=CLU PE=1 SV=1;tr|H0YLK8|H0YLK8_HUMAN Clusterin (Fragment) OS=Homo sapiens OX=9606 GN=CLU PE=1 SV=1	30.6823	26.4343	26.4343	18	18	18	18	41	41	41	52.494	0	307.78	1723000000	37		449	10				41	P10909;H0YC35;H0YLK8;E7ERK6;E7ETB4;E5RJZ5;H0YAS8;E5RG36;E5RGB0;E5RH61	P10909;H0YC35;H0YLK8	18	18	True;True;True;True;True;True;True;True;True;True;True;True;True;True;True;True;True;True
Microtubule-associated protein 2	MAP2	sp|P11137|MTAP2_HUMAN Microtubule-associated protein 2 OS=Homo sapiens OX=9606 GN=MAP2 PE=1 SV=4	24.6296	18.0905	18.0905	1	1	1	1	1.2	1.2	1.2	199.52	0.06391	5.4104	25957000	0	1827	1827	1	1	1	1	1.2	P11137	P11137	1	1	TRUE
Prolactin-inducible protein	PIP	sp|P12273|PIP_HUMAN Prolactin-inducible protein OS=Homo sapiens OX=9606 GN=PIP PE=1 SV=1	25.4146	22.2447	22.2447	3	3	3	3	30.8	30.8	30.8	16.572	0	19.669	44727000	4	146	146	1	3	3	3	30.8	P12273	P12273	3	3	True;True;True
Low affinity immunoglobulin gamma Fc region receptor II-a	FCGR2A	sp|P12318|FCG2A_HUMAN Low affinity immunoglobulin gamma Fc region receptor II-a OS=Homo sapiens OX=9606 GN=FCGR2A PE=1 SV=4;tr|V9GY83|V9GY83_HUMAN Low affinity immunoglobulin gamma Fc region receptor II-a (Fragment) OS=Homo sapiens OX=9606 GN=FCGR2A PE=1 S	28.6704	25.3484	25.3484	5	5	5	5	21.5	21.5	21.5	35	0	94.533	427210000	11		317	9				21.5	P12318;V9GY83;F5GXY9;F5GX41;H0YGT0;P31995;V9GY55;A0A087WXE5;P31994	P12318;V9GY83;F5GXY9;F5GX41	5	5	True;True;True;True;True
Immunoglobulin lambda-like polypeptide 1	IGLL1	sp|P15814|IGLL1_HUMAN Immunoglobulin lambda-like polypeptide 1 OS=Homo sapiens OX=9606 GN=IGLL1 PE=1 SV=1	27.2286	23.7691	23.7691	1	2	1	1	10.8	7	7	22.963	0	65.792	157260000	6	213	213	1	2	1	1	10.8	P15814	P15814	2	1	False;True
Histone H1.5	HIST1H1B	sp|P16401|H15_HUMAN Histone H1.5 OS=Homo sapiens OX=9606 GN=HIST1H1B PE=1 SV=3	23.3489	20.027	20.027	1	1	1	1	7.1	7.1	7.1	22.58	0	6.8579	10684000	2	226	226	1	1	1	1	7.1	P16401	P16401	1	1	TRUE
Histone H1.3	HIST1H1D	sp|P16402|H13_HUMAN Histone H1.3 OS=Homo sapiens OX=9606 GN=HIST1H1D PE=1 SV=2	28.722	25.137	25.137	1	7	7	1	24.4	24.4	7.2	22.35	0	45.349	442770000	16	221	221	1	7	7	1	24.4	P16402	P16402	7	7	True;True;True;True;True;True;True
Histone H1.2;Histone H1.4	HIST1H1C;HIST1H1E	sp|P16403|H12_HUMAN Histone H1.2 OS=Homo sapiens OX=9606 GN=HIST1H1C PE=1 SV=2;sp|P10412|H14_HUMAN Histone H1.4 OS=Homo sapiens OX=9606 GN=HIST1H1E PE=1 SV=2	22.6147	19.1552	19.1552	1	7	1	1	27.7	9.9	9.9	21.364	0.054902	5.4598	6422400	1		213	4				27.7	P16403;P10412;P22492;Q02539	P16403;P10412	7	1	False;False;False;False;False;True;False
Alpha-1-acid glycoprotein 2	ORM2	sp|P19652|A1AG2_HUMAN Alpha-1-acid glycoprotein 2 OS=Homo sapiens OX=9606 GN=ORM2 PE=1 SV=2	30.4476	27.1256	27.1256	6	13	6	6	52.7	34.3	34.3	23.602	0	166.11	1464300000	30	201	201	1	13	6	6	52.7	P19652	P19652	13	6	False;False;False;False;True;True;True;True;False;True;False;False;True
Inter-alpha-trypsin inhibitor heavy chain H2	ITIH2	tr|Q5T985|Q5T985_HUMAN Inter-alpha-trypsin inhibitor heavy chain H2 OS=Homo sapiens OX=9606 GN=ITIH2 PE=1 SV=1;sp|P19823|ITIH2_HUMAN Inter-alpha-trypsin inhibitor heavy chain H2 OS=Homo sapiens OX=9606 GN=ITIH2 PE=1 SV=2	22.7912	17.2366	17.2366	1	1	1	1	1.4	1.4	1.4	105.21	0.03629	5.4958	7258300	1		935	2				1.4	Q5T985;P19823	Q5T985;P19823	1	1	TRUE
Ras-related protein Rab-5A	RAB5A	sp|P20339|RAB5A_HUMAN Ras-related protein Rab-5A OS=Homo sapiens OX=9606 GN=RAB5A PE=1 SV=2	30.5403	27.0809	27.0809	1	1	1	1	8.4	8.4	8.4	23.658	0.0088889	5.8793	1561500000	2	215	215	1	1	1	1	8.4	P20339	P20339	1	1	TRUE
Insulin-like growth factor-binding protein 4	IGFBP4	sp|P22692|IBP4_HUMAN Insulin-like growth factor-binding protein 4 OS=Homo sapiens OX=9606 GN=IGFBP4 PE=1 SV=2	22.2728	18.9509	18.9509	1	1	1	1	6.6	6.6	6.6	27.934	0	6.2792	5067500	1	258	258	1	1	1	1	6.6	P22692	P22692	1	1	TRUE
Ig heavy chain V-I region V35		sp|P23083|HV102_HUMAN Immunoglobulin heavy variable 1-2 OS=Homo sapiens OX=9606 GN=IGHV1-2 PE=1 SV=2	26.6568	23.8494	23.8494	3	3	3	3	22.2	22.2	22.2	13.085	0	31.165	105800000	6		117	2				22.2	P23083;A0A0C4DH31	P23083	3	3	True;True;True
Zinc-alpha-2-glycoprotein	AZGP1	sp|P25311|ZA2G_HUMAN Zinc-alpha-2-glycoprotein OS=Homo sapiens OX=9606 GN=AZGP1 PE=1 SV=2;tr|C9JEV0|C9JEV0_HUMAN Zinc-alpha-2-glycoprotein OS=Homo sapiens OX=9606 GN=AZGP1 PE=1 SV=1	29.6274	25.4575	25.4575	11	11	11	11	41.3	41.3	41.3	34.258	0	115.89	829340000	20		298	3				41.3	P25311;C9JEV0;H7BZJ8	P25311;C9JEV0	11	11	True;True;True;True;True;True;True;True;True;True;True
Serum paraoxonase/arylesterase 1	PON1	sp|P27169|PON1_HUMAN Serum paraoxonase/arylesterase 1 OS=Homo sapiens OX=9606 GN=PON1 PE=1 SV=3	28.1279	24.221	24.221	1	1	1	1	4.2	4.2	4.2	39.731	0.0681	5.364	293320000	1	355	355	1	1	1	1	4.2	P27169	P27169	1	1	TRUE
Properdin	CFP	sp|P27918|PROP_HUMAN Properdin OS=Homo sapiens OX=9606 GN=CFP PE=1 SV=2;tr|E9PAQ1|E9PAQ1_HUMAN Properdin OS=Homo sapiens OX=9606 GN=CFP PE=1 SV=1	26.2655	22.0176	22.0176	5	5	5	5	14.9	14.9	14.9	51.276	0	32.841	80668000	7		469	3				14.9	P27918;E9PAQ1;C9J7V5	P27918;E9PAQ1	5	5	True;True;True;True;True
Protein-lysine 6-oxidase	LOX	sp|P28300|LYOX_HUMAN Protein-lysine 6-oxidase OS=Homo sapiens OX=9606 GN=LOX PE=1 SV=2	25.4581	21.4581	21.4581	2	2	2	2	7.2	7.2	7.2	46.944	0	11.044	46094000	2	417	417	1	2	2	2	7.2	P28300	P28300	2	2	True;True
M-phase inducer phosphatase 1	CDC25A	sp|P30304|MPIP1_HUMAN M-phase inducer phosphatase 1 OS=Homo sapiens OX=9606 GN=CDC25A PE=1 SV=2	23.9692	18.9692	18.9692	1	1	1	1	1.7	1.7	1.7	59.086	0.10272	5.2613	16423000	1	524	524	1	1	1	1	1.7	P30304	P30304	1	1	TRUE
Putative lipocalin 1-like protein 1;Lipocalin-1	LCN1P1;LCN1	sp|Q5VSP4|LC1L1_HUMAN Putative lipocalin 1-like protein 1 OS=Homo sapiens OX=9606 GN=LCN1P1 PE=5 SV=1;sp|P31025|LCN1_HUMAN Lipocalin-1 OS=Homo sapiens OX=9606 GN=LCN1 PE=1 SV=1				1	1	1	1	6.8	6.8	6.8	17.918	0	8.1572	0	1		162	2				6.8	Q5VSP4;P31025	Q5VSP4;P31025	1	1	TRUE
Protein S100-A7;Protein S100-A7A	S100A7;S100A7A	sp|P31151|S10A7_HUMAN Protein S100-A7 OS=Homo sapiens OX=9606 GN=S100A7 PE=1 SV=4;sp|Q86SG5|S1A7A_HUMAN Protein S100-A7A OS=Homo sapiens OX=9606 GN=S100A7A PE=1 SV=3	26.072	23.2647	23.2647	5	5	5	5	67.3	67.3	67.3	11.471	0	92.074	70544000	11		101	2				67.3	P31151;Q86SG5	P31151;Q86SG5	5	5	True;True;True;True;True
Ribonuclease 4	RNASE4	sp|P34096|RNAS4_HUMAN Ribonuclease 4 OS=Homo sapiens OX=9606 GN=RNASE4 PE=1 SV=3	24.2631	21.263	21.263	2	2	2	2	16.3	16.3	16.3	16.84	0	12.384	20133000	3	147	147	1	2	2	2	16.3	P34096	P34096	2	2	True;True
Polycomb complex protein BMI-1	BMI1;COMMD3-BMI1	tr|Q5T8Z2|Q5T8Z2_HUMAN Polycomb complex protein BMI-1 (Fragment) OS=Homo sapiens OX=9606 GN=BMI1 PE=4 SV=1;tr|R4GMX3|R4GMX3_HUMAN COMMD3-BMI1 readthrough OS=Homo sapiens OX=9606 GN=COMMD3-BMI1 PE=4 SV=1;sp|P35226|BMI1_HUMAN Polycomb complex protein BMI-1 O	25.0697	21.8998	21.8998	1	1	1	1	5.4	5.4	5.4	21.261	0.10559	5.2677	35216000	0		184	3				5.4	Q5T8Z2;R4GMX3;P35226	Q5T8Z2;R4GMX3;P35226	1	1	TRUE
Prostaglandin-H2 D-isomerase	PTGDS	sp|P41222|PTGDS_HUMAN Prostaglandin-H2 D-isomerase OS=Homo sapiens OX=9606 GN=PTGDS PE=1 SV=1;tr|H0Y5A1|H0Y5A1_HUMAN Prostaglandin-H2 D-isomerase (Fragment) OS=Homo sapiens OX=9606 GN=PTGDS PE=1 SV=2;tr|Q5SQ11|Q5SQ11_HUMAN Prostaglandin-H2 D-isomerase (Fra	26.5691	23.5691	23.5691	2	2	2	2	17.4	17.4	17.4	21.029	0	19.718	99562000	7		190	3				17.4	P41222;H0Y5A1;Q5SQ11	P41222;H0Y5A1;Q5SQ11	2	2	True;True
Afamin	AFM	sp|P43652|AFAM_HUMAN Afamin OS=Homo sapiens OX=9606 GN=AFM PE=1 SV=1	25.2597	20.0503	20.0503	4	4	4	4	9	9	9	69.068	0	25.692	40173000	6	599	599	1	4	4	4	9	P43652	P43652	4	4	True;True;True;True
Melatonin receptor type 1A	MTNR1A	sp|P48039|MTR1A_HUMAN Melatonin receptor type 1A OS=Homo sapiens OX=9606 GN=MTNR1A PE=1 SV=1				1	1	1	1	2.6	2.6	2.6	39.374	0.10511	5.2605	0	1	350	350	1	1	1	1	2.6	P48039	P48039	1	1	TRUE
Stromal cell-derived factor 1;SDF-1-beta(3-72);SDF-1-alpha(3-67)	CXCL12	sp|P48061|SDF1_HUMAN Stromal cell-derived factor 1 OS=Homo sapiens OX=9606 GN=CXCL12 PE=1 SV=1	28.123	25.801	25.801	4	4	4	4	34.4	34.4	34.4	10.666	0	51.144	292320000	12	93	93	1	4	4	4	34.4	P48061	P48061	4	4	True;True;True;True
Iron-responsive element-binding protein 2	IREB2	sp|P48200|IREB2_HUMAN Iron-responsive element-binding protein 2 OS=Homo sapiens OX=9606 GN=IREB2 PE=1 SV=4	28.112	22.6526	22.6526	1	1	1	1	0.7	0.7	0.7	105.06	0.10265	5.2876	290110000	1	963	963	1	1	1	1	0.7	P48200	P48200	1	1	TRUE
Death-associated protein kinase 1	DAPK1	sp|P53355|DAPK1_HUMAN Death-associated protein kinase 1 OS=Homo sapiens OX=9606 GN=DAPK1 PE=1 SV=6	26.7046	20.5753	20.5753	1	1	1	1	2.2	2.2	2.2	160.04	0.012821	5.688	109370000	1	1430	1430	1	1	1	1	2.2	P53355	P53355	1	1	TRUE
C-C motif chemokine 18;CCL18(1-68);CCL18(3-69);CCL18(4-69)	CCL18	sp|P55774|CCL18_HUMAN C-C motif chemokine 18 OS=Homo sapiens OX=9606 GN=CCL18 PE=1 SV=1	26.016	24.016	24.016	1	1	1	1	24.7	24.7	24.7	9.8487	0	9.5806	67857000	2	89	89	1	1	1	1	24.7	P55774	P55774	1	1	TRUE
Neutrophil defensin 3;HP 3-56;Neutrophil defensin 2;Neutrophil defensin 1;HP 1-56;Neutrophil defensin 2	DEFA3;DEFA1	sp|P59666|DEF3_HUMAN Neutrophil defensin 3 OS=Homo sapiens OX=9606 GN=DEFA3 PE=1 SV=1;sp|P59665|DEF1_HUMAN Neutrophil defensin 1 OS=Homo sapiens OX=9606 GN=DEFA1 PE=1 SV=1	25.9117	23.9117	23.9117	2	2	2	2	19.1	19.1	19.1	10.245	0	12.558	63123000	4		94	2				19.1	P59666;P59665	P59666;P59665	2	2	True;True
Keratinocyte differentiation-associated protein	KRTDAP	sp|P60985|KTDAP_HUMAN Keratinocyte differentiation-associated protein OS=Homo sapiens OX=9606 GN=KRTDAP PE=1 SV=1	23.2893	21.7043	21.7043	1	1	1	1	12.1	12.1	12.1	11.05	0.0088496	5.8651	10251000	3	99	99	1	1	1	1	12.1	P60985	P60985	1	1	TRUE
Lysozyme C;Lysozyme	LYZ	sp|P61626|LYSC_HUMAN Lysozyme C OS=Homo sapiens OX=9606 GN=LYZ PE=1 SV=1;tr|F8VV32|F8VV32_HUMAN Lysozyme OS=Homo sapiens OX=9606 GN=LYZ PE=1 SV=1;tr|A0A0B4J259|A0A0B4J259_HUMAN Lysozyme OS=Homo sapiens OX=9606 GN=LYZ PE=1 SV=1	28.8661	25.6961	25.6961	6	6	6	6	52	52	52	16.537	0	109.45	489270000	11		148	3				52	P61626;F8VV32;A0A0B4J259	P61626;F8VV32;A0A0B4J259	6	6	True;True;True;True;True;True
Beta-2-microglobulin;Beta-2-microglobulin form pI 5.3	B2M	sp|P61769|B2MG_HUMAN Beta-2-microglobulin OS=Homo sapiens OX=9606 GN=B2M PE=1 SV=1;tr|H0YLF3|H0YLF3_HUMAN Beta-2-microglobulin (Fragment) OS=Homo sapiens OX=9606 GN=B2M PE=1 SV=1;tr|F5H6I0|F5H6I0_HUMAN Beta-2-microglobulin OS=Homo sapiens OX=9606 GN=B2M PE	35.0858	32.5009	32.5009	7	7	7	7	60.5	60.5	60.5	13.714	0	323.31	36466000000	44		119	3				60.5	P61769;H0YLF3;F5H6I0	P61769;H0YLF3;F5H6I0	7	7	True;True;True;True;True;True;True
Histone H4	HIST1H4A	sp|P62805|H4_HUMAN Histone H4 OS=Homo sapiens OX=9606 GN=HIST1H4A PE=1 SV=2	29.3446	26.7596	26.7596	6	6	6	6	52.4	52.4	52.4	11.367	0	43.058	681710000	15	103	103	1	6	6	6	52.4	P62805	P62805	6	6	True;True;True;True;True;True
Hemoglobin subunit beta;LVV-hemorphin-7;Spinorphin;Hemoglobin subunit delta	HBB;HBD	sp|P68871|HBB_HUMAN Hemoglobin subunit beta OS=Homo sapiens OX=9606 GN=HBB PE=1 SV=2;tr|F8W6P5|F8W6P5_HUMAN Hemoglobin subunit beta (Fragment) OS=Homo sapiens OX=9606 GN=HBB PE=1 SV=1;tr|A0A2R8Y7R2|A0A2R8Y7R2_HUMAN Hemoglobin subunit beta OS=Homo sapiens O	27.4261	23.9666	23.9666	7	7	7	7	58.5	58.5	58.5	15.998	0	51.729	180330000	11		147	8				58.5	P68871;F8W6P5;A0A2R8Y7R2;P02042;E9PEW8;E9PFT6;A0A0J9YWK4;C9JRG0	P68871;F8W6P5;A0A2R8Y7R2;P02042	7	7	True;True;True;True;True;True;True
Hemoglobin subunit alpha	HBA1	sp|P69905|HBA_HUMAN Hemoglobin subunit alpha OS=Homo sapiens OX=9606 GN=HBA1 PE=1 SV=2;tr|A0A2R8Y7C0|A0A2R8Y7C0_HUMAN Hemoglobin subunit alpha (Fragment) OS=Homo sapiens OX=9606 GN=HBA2 PE=1 SV=1	27.9354	24.9353	24.9353	2	5	5	2	56.3	56.3	18.3	15.257	0	32.924	256680000	11		142	3				56.3	P69905;A0A2R8Y7C0;CON__P01966	P69905;A0A2R8Y7C0	5	5	True;True;True;True;True
Dermcidin;Survival-promoting peptide;DCD-1	DCD	sp|P81605|DCD_HUMAN Dermcidin OS=Homo sapiens OX=9606 GN=DCD PE=1 SV=2	26.9739	24.652	24.652	2	2	2	2	22.7	22.7	22.7	11.284	0	14.234	131810000	4	110	110	1	2	2	2	22.7	P81605	P81605	2	2	True;True
Complement factor H-related protein 1	CFHR1	sp|Q03591|FHR1_HUMAN Complement factor H-related protein 1 OS=Homo sapiens OX=9606 GN=CFHR1 PE=1 SV=2;tr|B1AKG0|B1AKG0_HUMAN Complement factor H-related protein 1 OS=Homo sapiens OX=9606 GN=CFHR1 PE=1 SV=1	28.2071	24.3002	24.3002	3	8	8	3	53.6	53.6	13	37.65	0	131.58	309880000	20		330	3				53.6	Q03591;B1AKG0;Q9BXR6	Q03591;B1AKG0	8	8	True;True;True;True;True;True;True;True
Regenerating islet-derived protein 3-alpha;Regenerating islet-derived protein 3-alpha 16.5 kDa form;Regenerating islet-derived protein 3-alpha 15 kDa form	REG3A	sp|Q06141|REG3A_HUMAN Regenerating islet-derived protein 3-alpha OS=Homo sapiens OX=9606 GN=REG3A PE=1 SV=1	27.2437	24.9218	24.9218	1	1	1	1	8	8	8	19.395	0.10588	5.2572	158920000	1	175	175	1	1	1	1	8	Q06141	Q06141	1	1	TRUE
Galectin-3-binding protein	LGALS3BP	sp|Q08380|LG3BP_HUMAN Galectin-3-binding protein OS=Homo sapiens OX=9606 GN=LGALS3BP PE=1 SV=1;tr|K7EQT9|K7EQT9_HUMAN Galectin-3-binding protein OS=Homo sapiens OX=9606 GN=LGALS3BP PE=1 SV=1;tr|K7ES75|K7ES75_HUMAN Galectin-3-binding protein (Fragment) OS=H	23.7152	19.0148	19.0148	2	2	2	2	3.9	3.9	3.9	65.33	0	11.091	13772000	2		585	9				3.9	Q08380;K7EQT9;K7ES75;K7EN99;K7ERZ6;K7EJD3;K7ESM3;K7EKQ5;K7EP36	Q08380;K7EQT9;K7ES75;K7EN99;K7ERZ6;K7EJD3;K7ESM3;K7EKQ5;K7EP36	2	2	True;True
Transcription factor HES-1	HES1	sp|Q14469|HES1_HUMAN Transcription factor HES-1 OS=Homo sapiens OX=9606 GN=HES1 PE=1 SV=1	30.5941	27.2722	27.2722	1	1	1	1	4.6	4.6	4.6	29.54	0	6.3196	1620900000	4	280	280	1	1	1	1	4.6	Q14469	Q14469	1	1	TRUE
Hyaluronan-binding protein 2;Hyaluronan-binding protein 2 50 kDa heavy chain;Hyaluronan-binding protein 2 50 kDa heavy chain alternate form;Hyaluronan-binding protein 2 27 kDa light chain;Hyaluronan-binding protein 2 27 kDa light chain alternate form	HABP2	sp|Q14520|HABP2_HUMAN Hyaluronan-binding protein 2 OS=Homo sapiens OX=9606 GN=HABP2 PE=1 SV=1	22.0682	17.9808	17.9808	1	1	1	1	1.8	1.8	1.8	62.671	0.0089286	5.8894	4397400	1	560	560	1	1	1	1	1.8	Q14520	Q14520	1	1	TRUE
Inter-alpha-trypsin inhibitor heavy chain H4;70 kDa inter-alpha-trypsin inhibitor heavy chain H4;35 kDa inter-alpha-trypsin inhibitor heavy chain H4	ITIH4	sp|Q14624|ITIH4_HUMAN Inter-alpha-trypsin inhibitor heavy chain H4 OS=Homo sapiens OX=9606 GN=ITIH4 PE=1 SV=4	29.9366	24.4772	24.4772	1	11	11	1	12.9	12.9	1.2	103.36	0	73.081	1027600000	24	930	930	1	11	11	1	12.9	Q14624	Q14624	11	11	True;True;True;True;True;True;True;True;True;True;True
Extracellular matrix protein 1	ECM1	sp|Q16610|ECM1_HUMAN Extracellular matrix protein 1 OS=Homo sapiens OX=9606 GN=ECM1 PE=1 SV=2	21.7758	16.8689	16.8689	1	1	1	1	2.4	2.4	2.4	60.673	0.016736	5.6203	3590700	1	540	540	1	1	1	1	2.4	Q16610	Q16610	1	1	TRUE
	HLA-G2.2	tr|Q31611|Q31611_HUMAN B2 microglobulin OS=Homo sapiens OX=9606 GN=HLA-G PE=1 SV=1	22.8099	19.0026	19.0026	1	2	1	1	9.8	4.5	4.5	27.68	0.016807	5.6257	7353000	1	246	246	1	2	1	1	9.8	Q31611	Q31611	2	1	False;True
Ankyrin repeat domain-containing protein SOWAHC	SOWAHC	sp|Q53LP3|SWAHC_HUMAN Ankyrin repeat domain-containing protein SOWAHC OS=Homo sapiens OX=9606 GN=SOWAHC PE=1 SV=1	25.2379	20.331	20.331	1	1	1	1	1.3	1.3	1.3	55.671	0	7.2844	39571000	2	525	525	1	1	1	1	1.3	Q53LP3	Q53LP3	1	1	TRUE
Uncharacterized protein KIAA1614	KIAA1614	sp|Q5VZ46|K1614_HUMAN Uncharacterized protein KIAA1614 OS=Homo sapiens OX=9606 GN=KIAA1614 PE=2 SV=3				1	1	1	1	1.3	1.3	1.3	126.6	0.036585	5.5209	0	1	1190	1190	1	1	1	1	1.3	Q5VZ46	Q5VZ46	1	1	TRUE
Serine/threonine-protein kinase ULK3	ULK3	sp|Q6PHR2|ULK3_HUMAN Serine/threonine-protein kinase ULK3 OS=Homo sapiens OX=9606 GN=ULK3 PE=1 SV=2	29.4434	24.9198	24.9198	1	1	1	1	1.5	1.5	1.5	53.444	0.0090498	5.9154	730030000	2	472	472	1	1	1	1	1.5	Q6PHR2	Q6PHR2	1	1	TRUE
ATPase family AAA domain-containing protein 2	ATAD2	sp|Q6PL18|ATAD2_HUMAN ATPase family AAA domain-containing protein 2 OS=Homo sapiens OX=9606 GN=ATAD2 PE=1 SV=1	26.4913	20.447	20.447	1	1	1	1	1.2	1.2	1.2	158.55	0.0087719	5.7795	94337000	2	1390	1390	1	1	1	1	1.2	Q6PL18	Q6PL18	1	1	TRUE
Leucine-rich repeat-containing protein 31	LRRC31	sp|Q6UY01|LRC31_HUMAN Leucine-rich repeat-containing protein 31 OS=Homo sapiens OX=9606 GN=LRRC31 PE=2 SV=1	26.9781	22.3343	22.3343	1	1	1	1	4.3	4.3	4.3	61.488	0.10135	5.3001	132200000	1	552	552	1	1	1	1	4.3	Q6UY01	Q6UY01	1	1	TRUE
SPOC domain-containing protein 1	SPOCD1	sp|Q6ZMY3|SPOC1_HUMAN SPOC domain-containing protein 1 OS=Homo sapiens OX=9606 GN=SPOCD1 PE=2 SV=1	26.5805	20.9081	20.9081	1	1	1	1	0.6	0.6	0.6	130.03	0.097484	5.2752	100350000	1	1216	1216	1	1	1	1	0.6	Q6ZMY3	Q6ZMY3	1	1	TRUE
Inactive ubiquitin carboxyl-terminal hydrolase 54	USP54	tr|X6RH50|X6RH50_HUMAN Inactive ubiquitin carboxyl-terminal hydrolase 54 (Fragment) OS=Homo sapiens OX=9606 GN=USP54 PE=1 SV=1;sp|Q70EL1|UBP54_HUMAN Inactive ubiquitin carboxyl-terminal hydrolase 54 OS=Homo sapiens OX=9606 GN=USP54 PE=1 SV=4	25.5039	22.0445	22.0445	1	1	1	1	19	19	19	17.305	0.10065	5.284	47583000	0		153	2				19	X6RH50;Q70EL1	X6RH50;Q70EL1	1	1	TRUE
Ovochymase-1	OVCH1	sp|Q7RTY7|OVCH1_HUMAN Ovochymase-1 OS=Homo sapiens OX=9606 GN=OVCH1 PE=2 SV=2	24.0927	18.162	18.162	1	1	1	1	2.1	2.1	2.1	125.06	0.1085	5.256	17891000	1	1134	1134	1	1	1	1	2.1	Q7RTY7	Q7RTY7	1	1	TRUE
LysM and putative peptidoglycan-binding domain-containing protein 3	LYSMD3	sp|Q7Z3D4|LYSM3_HUMAN LysM and putative peptidoglycan-binding domain-containing protein 3 OS=Homo sapiens OX=9606 GN=LYSMD3 PE=1 SV=2	27.0741	23.6146	23.6146	1	1	1	1	7.5	7.5	7.5	34.537	0.10386	5.2595	141290000	0	306	306	1	1	1	1	7.5	Q7Z3D4	Q7Z3D4	1	1	TRUE
Mucin-19	MUC19	sp|Q7Z5P9|MUC19_HUMAN Mucin-19 OS=Homo sapiens OX=9606 GN=MUC19 PE=1 SV=3	24.5234	16.6841	16.6841	1	1	1	1	0.1	0.1	0.1	805.24	0.076923	5.3387	24115000	0	8384	8384	1	1	1	1	0.1	Q7Z5P9	Q7Z5P9	1	1	TRUE
Extracellular sulfatase Sulf-1	SULF1	sp|Q8IWU6|SULF1_HUMAN Extracellular sulfatase Sulf-1 OS=Homo sapiens OX=9606 GN=SULF1 PE=1 SV=1	26.7058	21.4964	21.4964	1	1	1	1	3.3	3.3	3.3	101.03	0.10479	5.2598	109460000	2	871	871	1	1	1	1	3.3	Q8IWU6	Q8IWU6	1	1	TRUE
Putative RNA polymerase II subunit B1 CTD phosphatase RPAP2	RPAP2	sp|Q8IXW5|RPAP2_HUMAN Putative RNA polymerase II subunit B1 CTD phosphatase RPAP2 OS=Homo sapiens OX=9606 GN=RPAP2 PE=1 SV=1	22.8436	17.9855	17.9855	1	1	1	1	4.4	4.4	4.4	69.508	0.10756	5.2543	7526500	0	612	612	1	1	1	1	4.4	Q8IXW5	Q8IXW5	1	1	TRUE
Activating signal cointegrator 1 complex subunit 3	ASCC3	sp|Q8N3C0|ASCC3_HUMAN Activating signal cointegrator 1 complex subunit 3 OS=Homo sapiens OX=9606 GN=ASCC3 PE=1 SV=3	27.5322	20.6619	20.6619	1	1	1	1	0.6	0.6	0.6	251.46	0.068345	5.3641	194100000	1	2202	2202	1	1	1	1	0.6	Q8N3C0	Q8N3C0	1	1	TRUE
Cell adhesion molecule 2	CADM2	sp|Q8N3J6|CADM2_HUMAN Cell adhesion molecule 2 OS=Homo sapiens OX=9606 GN=CADM2 PE=2 SV=1	28.9287	25.3437	25.3437	1	1	1	1	3.2	3.2	3.2	47.553	0.051587	5.4803	510990000	2	435	435	1	1	1	1	3.2	Q8N3J6	Q8N3J6	1	1	TRUE
PiggyBac transposable element-derived protein 5	PGBD5	sp|Q8N414|PGBD5_HUMAN PiggyBac transposable element-derived protein 5 OS=Homo sapiens OX=9606 GN=PGBD5 PE=1 SV=4	24.5586	19.8581	19.8581	1	1	1	1	5.9	5.9	5.9	58.463	0.10651	5.2579	24710000	1	524	524	1	1	1	1	5.9	Q8N414	Q8N414	1	1	TRUE
Coiled-coil domain-containing protein 185	CCDC185	sp|Q8N715|CC185_HUMAN Coiled-coil domain-containing protein 185 OS=Homo sapiens OX=9606 GN=CCDC185 PE=1 SV=2	17.5369	12.4925	12.4925	1	1	1	1	1.4	1.4	1.4	72.348	0	6.7638	190170	0	623	623	1	1	1	1	1.4	Q8N715	Q8N715	1	1	TRUE
Coiled-coil domain-containing protein 168	CCDC168	sp|Q8NDH2|CC168_HUMAN Coiled-coil domain-containing protein 168 OS=Homo sapiens OX=9606 GN=CCDC168 PE=2 SV=2	26.1595	19.0406	19.0406	1	1	1	1	1.1	1.1	1.1	277.95	0.036145	5.4948	74956000	4	2452	2452	1	1	1	1	1.1	Q8NDH2	Q8NDH2	1	1	TRUE
Phosphatidylinositol 3,4,5-trisphosphate-dependent Rac exchanger 1 protein	PREX1	sp|Q8TCU6|PREX1_HUMAN Phosphatidylinositol 3,4,5-trisphosphate-dependent Rac exchanger 1 protein OS=Homo sapiens OX=9606 GN=PREX1 PE=1 SV=3	24.5038	18.1288	18.1288	1	1	1	1	1	1	1	186.2	0.065693	5.3868	23789000	1	1659	1659	1	1	1	1	1	Q8TCU6	Q8TCU6	1	1	TRUE
Protein-methionine sulfoxide oxidase MICAL1	MICAL1	sp|Q8TDZ2|MICA1_HUMAN [F-actin]-monooxygenase MICAL1 OS=Homo sapiens OX=9606 GN=MICAL1 PE=1 SV=2	25.6377	20.1141	20.1141	1	1	1	1	0.9	0.9	0.9	117.87	0.083045	5.3243	52207000	0	1067	1067	1	1	1	1	0.9	Q8TDZ2	Q8TDZ2	1	1	TRUE
WASP homolog-associated protein with actin, membranes and microtubules	WHAMM	sp|Q8TF30|WHAMM_HUMAN WASP homolog-associated protein with actin, membranes and microtubules OS=Homo sapiens OX=9606 GN=WHAMM PE=1 SV=2	31.0687	25.7468	25.7468	1	1	1	1	2.1	2.1	2.1	90.923	0.061776	5.4467	2252200000	5	809	809	1	1	1	1	2.1	Q8TF30	Q8TF30	1	1	TRUE
Intelectin-1	ITLN1	sp|Q8WWA0|ITLN1_HUMAN Intelectin-1 OS=Homo sapiens OX=9606 GN=ITLN1 PE=1 SV=1				1	1	1	1	3.2	3.2	3.2	34.961	0.10312	5.2694	0	1	313	313	1	1	1	1	3.2	Q8WWA0	Q8WWA0	1	1	TRUE
Pre-mRNA-splicing factor ATP-dependent RNA helicase PRP16	DHX38	sp|Q92620|PRP16_HUMAN Pre-mRNA-splicing factor ATP-dependent RNA helicase PRP16 OS=Homo sapiens OX=9606 GN=DHX38 PE=1 SV=2	25.2368	19.3788	19.3788	1	1	1	1	2.3	2.3	2.3	140.5	0.10619	5.2578	39539000	1	1227	1227	1	1	1	1	2.3	Q92620	Q92620	1	1	TRUE
COP9 signalosome complex subunit 5	COPS5	sp|Q92905|CSN5_HUMAN COP9 signalosome complex subunit 5 OS=Homo sapiens OX=9606 GN=COPS5 PE=1 SV=4	24.6225	20.5351	20.5351	1	1	1	1	4.2	4.2	4.2	37.578	0.098639	5.3033	25829000	1	334	334	1	1	1	1	4.2	Q92905	Q92905	1	1	TRUE
SPRY domain-containing SOCS box protein 4	SPSB4	sp|Q96A44|SPSB4_HUMAN SPRY domain-containing SOCS box protein 4 OS=Homo sapiens OX=9606 GN=SPSB4 PE=1 SV=1	24.4435	20.8586	20.8586	1	1	1	1	6.2	6.2	6.2	30.178	0	6.9804	22816000	2	273	273	1	1	1	1	6.2	Q96A44	Q96A44	1	1	TRUE
Tuberoinfundibular peptide of 39 residues	PTH2	sp|Q96A98|TIP39_HUMAN Tuberoinfundibular peptide of 39 residues OS=Homo sapiens OX=9606 GN=PTH2 PE=1 SV=1	24.2109	21.4035	21.4035	1	1	1	1	21	21	21	11.202	0.10787	5.2544	19418000	0	100	100	1	1	1	1	21	Q96A98	Q96A98	1	1	TRUE
Methylthioribulose-1-phosphate dehydratase	APIP	tr|S4R3D6|S4R3D6_HUMAN Methylthioribulose-1-phosphate dehydratase OS=Homo sapiens OX=9606 GN=APIP PE=1 SV=1;sp|Q96GX9|MTNB_HUMAN Methylthioribulose-1-phosphate dehydratase OS=Homo sapiens OX=9606 GN=APIP PE=1 SV=1	25.2531	21.5527	21.5527	1	1	1	1	4.6	4.6	4.6	21.956	0.10164	5.2856	39990000	1		195	2				4.6	S4R3D6;Q96GX9	S4R3D6;Q96GX9	1	1	TRUE
Probable 2-oxoglutarate dehydrogenase E1 component DHKTD1, mitochondrial	DHTKD1	sp|Q96HY7|DHTK1_HUMAN Probable 2-oxoglutarate dehydrogenase E1 component DHKTD1, mitochondrial OS=Homo sapiens OX=9606 GN=DHTKD1 PE=1 SV=2	32.8438	27.7994	27.7994	1	1	1	1	1.6	1.6	1.6	103.08	0.032787	5.5293	7708400000	3	919	919	1	1	1	1	1.6	Q96HY7	Q96HY7	1	1	TRUE
Osteomodulin	OMD	sp|Q99983|OMD_HUMAN Osteomodulin OS=Homo sapiens OX=9606 GN=OMD PE=1 SV=1	30.591	26.6842	26.6842	1	1	1	1	2.4	2.4	2.4	49.492	0.0091324	5.9412	1617400000	3	421	421	1	1	1	1	2.4	Q99983	Q99983	1	1	TRUE
Transcription regulator protein BACH2	BACH2	sp|Q9BYV9|BACH2_HUMAN Transcription regulator protein BACH2 OS=Homo sapiens OX=9606 GN=BACH2 PE=1 SV=1	24.9832	19.6613	19.6613	1	1	1	1	1	1	1	92.536	0.058366	5.456	33166000	1	841	841	1	1	1	1	1	Q9BYV9	Q9BYV9	1	1	TRUE
39S ribosomal protein L44, mitochondrial	MRPL44	sp|Q9H9J2|RM44_HUMAN 39S ribosomal protein L44, mitochondrial OS=Homo sapiens OX=9606 GN=MRPL44 PE=1 SV=1				1	1	1	1	2.7	2.7	2.7	37.535	0.098413	5.2777	0	1	332	332	1	1	1	1	2.7	Q9H9J2	Q9H9J2	1	1	TRUE
Resistin	RETN	sp|Q9HD89|RETN_HUMAN Resistin OS=Homo sapiens OX=9606 GN=RETN PE=1 SV=1	27.6807	24.8734	24.8734	3	3	3	3	31.5	31.5	31.5	11.419	0	45.156	215140000	8	108	108	1	3	3	3	31.5	Q9HD89	Q9HD89	3	3	True;True;True
Calmodulin-like protein 5	CALML5	sp|Q9NZT1|CALL5_HUMAN Calmodulin-like protein 5 OS=Homo sapiens OX=9606 GN=CALML5 PE=1 SV=2	23.7404	20.5704	20.5704	1	1	1	1	9.6	9.6	9.6	15.892	0	7.905	14014000	2	146	146	1	1	1	1	9.6	Q9NZT1	Q9NZT1	1	1	TRUE
LIM domain-containing protein 1	LIMD1	sp|Q9UGP4|LIMD1_HUMAN LIM domain-containing protein 1 OS=Homo sapiens OX=9606 GN=LIMD1 PE=1 SV=1	23.144	18.2371	18.2371	1	1	1	1	4.3	4.3	4.3	72.189	0.098726	5.2782	9268900	1	676	676	1	1	1	1	4.3	Q9UGP4	Q9UGP4	1	1	TRUE
A disintegrin and metalloproteinase with thrombospondin motifs 5	ADAMTS5	sp|Q9UNA0|ATS5_HUMAN A disintegrin and metalloproteinase with thrombospondin motifs 5 OS=Homo sapiens OX=9606 GN=ADAMTS5 PE=1 SV=2	28.2877	22.4297	22.4297	7	7	7	7	10.9	10.9	10.9	101.72	0	56.331	327680000	11	930	930	1	7	7	7	10.9	Q9UNA0	Q9UNA0	7	7	True;True;True;True;True;True;True
Solute carrier family 22 member 14	SLC22A14	sp|Q9Y267|S22AE_HUMAN Solute carrier family 22 member 14 OS=Homo sapiens OX=9606 GN=SLC22A14 PE=2 SV=4				1	1	1	1	2	2	2	66.683	0.036735	5.5248	0	1	594	594	1	1	1	1	2	Q9Y267	Q9Y267	1	1	TRUE
Sodium/hydrogen exchanger 8	SLC9A8	sp|Q9Y2E8|SL9A8_HUMAN Sodium/hydrogen exchanger 8 OS=Homo sapiens OX=9606 GN=SLC9A8 PE=1 SV=4	28.1465	24.059	24.059	1	1	1	1	1.7	1.7	1.7	65.421	0.10368	5.2911	297120000	1	581	581	1	1	1	1	1.7	Q9Y2E8	Q9Y2E8	1	1	TRUE
Myosin-4	MYH4	sp|Q9Y623|MYH4_HUMAN Myosin-4 OS=Homo sapiens OX=9606 GN=MYH4 PE=2 SV=2	25.6645	18.978	18.978	1	1	1	1	0.6	0.6	0.6	223.07	0.10494	5.2668	53186000	0	1939	1939	1	1	1	1	0.6	Q9Y623	Q9Y623	1	1	TRUE
	MPP7	tr|U5GXS2|U5GXS2_HUMAN MAGUK p55 subfamily member 7 (Fragment) OS=Homo sapiens OX=9606 GN=MPP7 PE=1 SV=1	29.267	25.4597	25.4597	1	1	1	1	3.2	3.2	3.2	36.01	0.10333	5.2895	646030000	1	312	312	1	1	1	1	3.2	U5GXS2	U5GXS2	1	1	TRUE

## Sheet: Patient 2
Protein names	Gene names	Fasta headers	iBAQ P2_interactome	iBAQ	Intensity P2_interactome	Unique peptides P2_interactome	Peptides	Razor + unique peptides	Unique peptides	Sequence coverage [%]	Unique + razor sequence coverage [%]	Unique sequence coverage [%]	Mol. weight [kDa]	Q-value	Score	Intensity	MS/MS count	Sequence length	Sequence lengths	Sequence coverage P2_interactome [%]	Number of proteins	Protein IDs	Majority protein IDs	Peptide is razor	Razor + unique peptides P2_interactome	Peptide counts (all)	Peptide counts (razor+unique)	Peptide counts (unique)	Peptides P2_interactome
Prickle-like protein 2	PRICKLE2	tr|A0A024R368|A0A024R368_HUMAN Prickle-like 2 (Drosophila), isoform CRA_a OS=Homo sapiens OX=9606 GN=PRICKLE2 PE=1 SV=1;sp|Q7Z3G6|PRIC2_HUMAN Prickle-like protein 2 OS=Homo sapiens OX=9606 GN=PRICKLE2 PE=1 SV=2	15.5443	15.5443	20.8662	1	1	1	1	1.2	1.2	1.2	95.614	0.052632	5.4298	1911400	0	844		1.2	2	A0A024R368;Q7Z3G6	A0A024R368;Q7Z3G6	TRUE	1	1;1	1;1	1;1	1
	IGLV4-69	sp|A0A075B6H9|LV469_HUMAN Immunoglobulin lambda variable 4-69 OS=Homo sapiens OX=9606 GN=IGLV4-69 PE=1 SV=1	26.361	26.361	28.683	4	4	4	4	43.7	43.7	43.7	12.773	0	34.301	430950000	8	119	119	43.7	1	A0A075B6H9	A0A075B6H9	True;True;True;True	4	4	4	4	4
	IGLV8-61	sp|A0A075B6I0|LV861_HUMAN Immunoglobulin lambda variable 8-61 OS=Homo sapiens OX=9606 GN=IGLV8-61 PE=3 SV=7	23.6391	23.6391	25.6391	2	2	2	2	13.1	13.1	13.1	12.814	0	13.198	52257000	2	122	122	13.1	1	A0A075B6I0	A0A075B6I0	True;True	2	2	2	2	2
	IGLV10-54	tr|A0A1W2PQ80|A0A1W2PQ80_HUMAN Immunoglobulin lambda variable 10-54 OS=Homo sapiens OX=9606 GN=IGLV10-54 PE=1 SV=1;sp|A0A075B6I4|LVX54_HUMAN Immunoglobulin lambda variable 10-54 OS=Homo sapiens OX=9606 GN=IGLV10-54 PE=3 SV=1	28.5282	28.5282	29.5282	1	1	1	1	9.4	9.4	9.4	12.733	0	7.8934	774220000	3	117		9.4	2	A0A1W2PQ80;A0A075B6I4	A0A1W2PQ80;A0A075B6I4	TRUE	1	1;1	1;1	1;1	1
Ig lambda chain V region 4A	IGLV7-46	sp|A0A075B6I9|LV746_HUMAN Immunoglobulin lambda variable 7-46 OS=Homo sapiens OX=9606 GN=IGLV7-46 PE=3 SV=4;sp|P04211|LV743_HUMAN Immunoglobulin lambda variable 7-43 OS=Homo sapiens OX=9606 GN=IGLV7-43 PE=3 SV=2	25.7723	25.7723	27.7723	2	2	2	2	13.7	13.7	13.7	12.468	0	10.797	229240000	2	117		13.7	2	A0A075B6I9;P04211	A0A075B6I9;P04211	True;True	2	2;2	2;2	2;2	2
	IGLV5-37	sp|A0A075B6J1|LV537_HUMAN Immunoglobulin lambda variable 5-37 OS=Homo sapiens OX=9606 GN=IGLV5-37 PE=3 SV=1	22.7704	22.7704	24.3554	1	1	1	1	16.3	16.3	16.3	13.277	0	13.022	21463000	2	123	123	16.3	1	A0A075B6J1	A0A075B6J1	TRUE	1	1	1	1	1
	IGLV3-12	sp|A0A075B6K2|LV312_HUMAN Immunoglobulin lambda variable 3-12 OS=Homo sapiens OX=9606 GN=IGLV3-12 PE=3 SV=2	22.91	22.91	24.91	1	2	1	1	23.5	13.9	13.9	12.387	0	9.6883	31525000	1	115	115	23.5	1	A0A075B6K2	A0A075B6K2	True;False	1	2	1	1	2
	IGLV3-10	sp|A0A075B6K4|LV310_HUMAN Immunoglobulin lambda variable 3-10 OS=Homo sapiens OX=9606 GN=IGLV3-10 PE=3 SV=2	28.1189	28.1189	30.1188	4	6	6	4	35.7	35.7	35.7	12.441	0	37.967	1165900000	16	115	115	35.7	1	A0A075B6K4	A0A075B6K4	True;True;True;True;True;True	6	6	6	4	6
	IGLV3-9	sp|A0A075B6K5|LV39_HUMAN Immunoglobulin lambda variable 3-9 OS=Homo sapiens OX=9606 GN=IGLV3-9 PE=3 SV=1	29.691	29.691	32.0129	2	4	4	2	49.6	49.6	26.1	12.332	0	239.66	4333500000	16	115	115	49.6	1	A0A075B6K5	A0A075B6K5	True;True;True;True	4	4	4	2	4
Ig heavy chain V-II region NEWM;Ig heavy chain V-II region ARH-77;Ig heavy chain V-II region WAH	IGHV4-4;IGHV4-61;IGHV4-31	sp|P0DP08|HVD82_HUMAN Immunoglobulin heavy variable 4-38-2 OS=Homo sapiens OX=9606 GN=IGHV4-38-2 PE=3 SV=1;tr|A0A087WW49|A0A087WW49_HUMAN Uncharacterized protein (Fragment) OS=Homo sapiens OX=9606 PE=4 SV=1;sp|A0A075B6R2|HV404_HUMAN Immunoglobulin heavy va	24.499	24.499	26.499	1	1	1	1	13.7	13.7	13.7	13.016	0	125.56	94840000	5	117		13.7	10	P0DP08;A0A087WW49;A0A075B6R2;P0DP07;P0DP06;A0A0C4DH41;A0A087WSY4;P01825;P06331;P01824	P0DP08;A0A087WW49;A0A075B6R2;P0DP07;P0DP06;A0A0C4DH41;A0A087WSY4;P01825;P06331;P01824	TRUE	1	1;1;1;1;1;1;1;1;1;1	1;1;1;1;1;1;1;1;1;1	1;1;1;1;1;1;1;1;1;1	1
	IGKV2-24;IGKV2D-24	sp|A0A0C4DH68|KV224_HUMAN Immunoglobulin kappa variable 2-24 OS=Homo sapiens OX=9606 GN=IGKV2-24 PE=3 SV=1;tr|A0A075B6R9|A0A075B6R9_HUMAN Immunoglobulin kappa variable 2D-24 (non-functional) (Fragment) OS=Homo sapiens OX=9606 GN=IGKV2D-24 PE=1 SV=1	28.9609	28.9609	30.9609	3	4	4	3	38.3	38.3	38.3	13.079	0	204.05	2090100000	16	120		38.3	2	A0A0C4DH68;A0A075B6R9	A0A0C4DH68;A0A075B6R9	True;True;True;True	4	4;4	4;4	3;3	4
	IGKV2D-29;IGKV A18;IGKV2D-26	sp|A0A075B6S2|KVD29_HUMAN Immunoglobulin kappa variable 2D-29 OS=Homo sapiens OX=9606 GN=IGKV2D-29 PE=3 SV=1;sp|A2NJV5|KV229_HUMAN Immunoglobulin kappa variable 2-29 OS=Homo sapiens OX=9606 GN=IGKV2-29 PE=3 SV=2;sp|A0A0A0MRZ7|KVD26_HUMAN Immunoglobulin kap	25.4745	25.4745	27.7964	2	4	2	2	25.8	25.8	25.8	13.143	0	27.965	233110000	6	120		25.8	3	A0A075B6S2;A2NJV5;A0A0A0MRZ7	A0A075B6S2;A2NJV5;A0A0A0MRZ7	False;False;True;True	2	4;4;3	2;2;1	2;2;1	4
	IGKV1-27	sp|A0A075B6S5|KV127_HUMAN Immunoglobulin kappa variable 1-27 OS=Homo sapiens OX=9606 GN=IGKV1-27 PE=3 SV=1	24.1403	24.1403	26.4622	1	2	1	1	29.1	15.4	15.4	12.711	0	11.921	92454000	2	117	117	29.1	1	A0A075B6S5	A0A075B6S5	True;False	1	2	1	1	2
40S ribosomal protein S17	RPS17	tr|H0YN88|H0YN88_HUMAN 40S ribosomal protein S17 OS=Homo sapiens OX=9606 GN=RPS17 PE=1 SV=1;tr|A0A075B716|A0A075B716_HUMAN 40S ribosomal protein S17 OS=Homo sapiens OX=9606 GN=RPS17 PE=1 SV=1;tr|H3BNC9|H3BNC9_HUMAN Uncharacterized protein OS=Homo sapiens O	21.6527	21.6527	24.2377	2	2	2	2	13.2	13.2	13.2	15.919	0	10.707	19782000	1	136		13.2	4	H0YN88;A0A075B716;H3BNC9;P08708	H0YN88;A0A075B716;H3BNC9;P08708	True;True	2	2;2;2;2	2;2;2;2	2;2;2;2	2
	IGHV3OR16-12	tr|A0A075B7B8|A0A075B7B8_HUMAN Immunoglobulin heavy variable 3/OR16-12 (non-functional) (Fragment) OS=Homo sapiens OX=9606 GN=IGHV3OR16-12 PE=1 SV=1	26.1601	26.1601	28.9675	1	2	1	1	18.8	9.4	9.4	12.874	0	16.736	524900000	4	117	117	18.8	1	A0A075B7B8	A0A075B7B8	False;True	1	2	1	1	2
	IGHV1OR15-1	tr|A0A075B7D0|A0A075B7D0_HUMAN Immunoglobulin heavy variable 1/OR15-1 (non-functional) (Fragment) OS=Homo sapiens OX=9606 GN=IGHV1OR15-1 PE=1 SV=1	23.3359	23.3359	26.1433	1	1	1	1	10.3	10.3	10.3	13.012	0	6.9078	74117000	3	117	117	10.3	1	A0A075B7D0	A0A075B7D0	TRUE	1	1	1	1	1
	IGHV3OR15-7	tr|A0A075B7D8|A0A075B7D8_HUMAN Immunoglobulin heavy variable 3/OR15-7 (pseudogene) (Fragment) OS=Homo sapiens OX=9606 GN=IGHV3OR15-7 PE=1 SV=1	25.1069	25.1069	27.9143	1	2	1	1	20.2	9.2	9.2	13.08	0.0037736	6.0393	252950000	3	119	119	20.2	1	A0A075B7D8	A0A075B7D8	False;True	1	2	1	1	2
	IGHV3OR16-10	tr|A0A075B7F0|A0A075B7F0_HUMAN Immunoglobulin heavy variable 3/OR16-10 (non-functional) (Fragment) OS=Homo sapiens OX=9606 GN=IGHV3OR16-10 PE=1 SV=1				1	2	1	1	27.6	18.1	18.1	12.579	0.003861	6.319	0	1	116	116	27.6	1	A0A075B7F0	A0A075B7F0	True;False	1	2	1	1	2
	IGLV5-45	sp|A0A087WSX0|LV545_HUMAN Immunoglobulin lambda variable 5-45 OS=Homo sapiens OX=9606 GN=IGLV5-45 PE=3 SV=1;tr|A0A0G2JSC0|A0A0G2JSC0_HUMAN Immunoglobulin lambda variable 5-45 (Fragment) OS=Homo sapiens OX=9606 GN=IGLV5-45 PE=1 SV=1;sp|A0A0G2JS06|LV539_HUMA	23.0651	23.0651	24.0651	2	2	2	2	26.8	26.8	26.8	13.162	0	13.522	17552000	3	123		26.8	3	A0A087WSX0;A0A0G2JSC0;A0A0G2JS06	A0A087WSX0;A0A0G2JSC0;A0A0G2JS06	True;True	2	2;2;1	2;2;1	2;2;1	2
	IGKV3D-15	sp|A0A087WSY6|KVD15_HUMAN Immunoglobulin kappa variable 3D-15 OS=Homo sapiens OX=9606 GN=IGKV3D-15 PE=3 SV=6	25.3281	25.3281	26.9131	1	3	1	1	32.2	7.8	7.8	12.534	0.046296	5.4993	126370000	2	115	115	32.2	1	A0A087WSY6	A0A087WSY6	False;False;True	1	3	1	1	3
Vacuolar protein sorting-associated protein 45	VPS45	tr|A0A2R8YEX8|A0A2R8YEX8_HUMAN Vacuolar protein sorting-associated protein 45 (Fragment) OS=Homo sapiens OX=9606 GN=VPS45 PE=1 SV=1;tr|A0A2R8YF01|A0A2R8YF01_HUMAN Vacuolar protein sorting-associated protein 45 OS=Homo sapiens OX=9606 GN=VPS45 PE=1 SV=1;tr|	24.5925	24.5925	27.5924	1	1	1	1	4.4	4.4	4.4	18	0.090244	5.2693	202370000	0	158		4.4	7	A0A2R8YEX8;A0A2R8YF01;A0A087WU65;A0A1B0GXI6;A0A2R8YE10;A0A2R8YD95;Q9NRW7	A0A2R8YEX8;A0A2R8YF01;A0A087WU65;A0A1B0GXI6;A0A2R8YE10;A0A2R8YD95;Q9NRW7	TRUE	1	1;1;1;1;1;1;1	1;1;1;1;1;1;1	1;1;1;1;1;1;1	1
L-lactate dehydrogenase;L-lactate dehydrogenase A-like 6A	LDHAL6A	tr|A0A087WUM2|A0A087WUM2_HUMAN L-lactate dehydrogenase OS=Homo sapiens OX=9606 GN=LDHAL6A PE=1 SV=1;sp|Q6ZMR3|LDH6A_HUMAN L-lactate dehydrogenase A-like 6A OS=Homo sapiens OX=9606 GN=LDHAL6A PE=2 SV=1	22.0349	22.0349	25.4943	1	1	1	1	9	9	9	25.497	0.091584	5.2715	47265000	0	233		9	2	A0A087WUM2;Q6ZMR3	A0A087WUM2;Q6ZMR3	TRUE	1	1;1	1;1	1;1	1
Ig kappa chain V-II region Cum;Ig kappa chain V-II region FR	IGKV2-40;IGKV2D-28	tr|A0A087X0Q4|A0A087X0Q4_HUMAN Immunoglobulin kappa variable 2-40 OS=Homo sapiens OX=9606 GN=IGKV2-40 PE=1 SV=1;sp|A0A087WW87|KV240_HUMAN Immunoglobulin kappa variable 2-40 OS=Homo sapiens OX=9606 GN=IGKV2-40 PE=3 SV=2;sp|P01614|KVD40_HUMAN Immunoglobulin	30.8023	30.8023	32.8023	4	5	5	4	35.6	35.6	35.6	11.434	0	81.138	7490000000	18	104		35.6	5	A0A087X0Q4;A0A087WW87;P01614;A0A075B6P5;P01615	A0A087X0Q4;A0A087WW87;P01614;A0A075B6P5;P01615	True;True;True;True;True	5	5;5;5;3;3	5;5;5;3;3	4;4;4;2;2	5
60S ribosomal protein L17	RPL17;RPL17-C18orf32	tr|A0A087WY81|A0A087WY81_HUMAN 60S ribosomal protein L17 (Fragment) OS=Homo sapiens OX=9606 GN=RPL17 PE=1 SV=6;tr|J3KRB3|J3KRB3_HUMAN 60S ribosomal protein L17 (Fragment) OS=Homo sapiens OX=9606 GN=RPL17 PE=1 SV=3;tr|A0A087WWH0|A0A087WWH0_HUMAN 60S ribosom				1	1	1	1	8.2	8.2	8.2	11.293	0.05949	5.383	0	1	97		8.2	11	A0A087WY81;J3KRB3;A0A087WWH0;J3QS96;A0A087WXM6;J3QQT2;J3QLC8;J3KRX5;A0A0A0MRF8;A0A0A6YYL6;P18621	A0A087WY81;J3KRB3;A0A087WWH0;J3QS96;A0A087WXM6;J3QQT2;J3QLC8;J3KRX5;A0A0A0MRF8;A0A0A6YYL6;P18621	TRUE	1	1;1;1;1;1;1;1;1;1;1;1	1;1;1;1;1;1;1;1;1;1;1	1;1;1;1;1;1;1;1;1;1;1	1
Apolipoprotein(a)	LPA	tr|A0A087WWY0|A0A087WWY0_HUMAN Apolipoprotein(a) OS=Homo sapiens OX=9606 GN=LPA PE=1 SV=1;sp|P08519|APOA_HUMAN Apolipoprotein(a) OS=Homo sapiens OX=9606 GN=LPA PE=1 SV=1	21.605	21.605	25.9974	2	2	2	2	20.1	20.1	20.1	62.553	0	23.152	66986000	3	571		20.1	2	A0A087WWY0;P08519	A0A087WWY0;P08519	True;True	2	2;2	2;2	2;2	2
WASH complex subunit FAM21C;WASH complex subunit FAM21A	FAM21A;FAM21C	tr|B1AP61|B1AP61_HUMAN WASH complex subunit 2A (Fragment) OS=Homo sapiens OX=9606 GN=WASHC2A PE=1 SV=1;tr|A0A087WYF6|A0A087WYF6_HUMAN WASH complex subunit 2A OS=Homo sapiens OX=9606 GN=WASHC2A PE=1 SV=1;tr|F8W7U3|F8W7U3_HUMAN WASH complex subunit 2A OS=Hom	24.8067	24.8067	28.1286	1	1	1	1	7.7	7.7	7.7	17.637	0.01107	5.9074	293470000	1	156		7.7	9	B1AP61;A0A087WYF6;F8W7U3;J3KP36;E7ESD2;A0A0A0MR88;A0A096LPC5;Q9Y4E1;Q641Q2	B1AP61;A0A087WYF6;F8W7U3;J3KP36;E7ESD2;A0A0A0MR88;A0A096LPC5;Q9Y4E1;Q641Q2	TRUE	1	1;1;1;1;1;1;1;1;1	1;1;1;1;1;1;1;1;1	1;1;1;1;1;1;1;1;1	1
C-Jun-amino-terminal kinase-interacting protein 3	MAPK8IP3	tr|E9PFH7|E9PFH7_HUMAN C-Jun-amino-terminal kinase-interacting protein 3 OS=Homo sapiens OX=9606 GN=MAPK8IP3 PE=1 SV=1;tr|A0A087WYG2|A0A087WYG2_HUMAN C-Jun-amino-terminal kinase-interacting protein 3 OS=Homo sapiens OX=9606 GN=MAPK8IP3 PE=1 SV=1;sp|Q9UPT6|	20.27	20.27	26.0514	1	1	1	1	0.8	0.8	0.8	146.68	0	7.0109	69543000	2	1330		0.8	3	E9PFH7;A0A087WYG2;Q9UPT6	E9PFH7;A0A087WYG2;Q9UPT6	TRUE	1	1;1;1	1;1;1	1;1;1	1
Exophilin-5	EXPH5	tr|A0A087WZJ0|A0A087WZJ0_HUMAN Exophilin-5 (Fragment) OS=Homo sapiens OX=9606 GN=EXPH5 PE=1 SV=1;tr|F5GXG5|F5GXG5_HUMAN Exophilin-5 (Fragment) OS=Homo sapiens OX=9606 GN=EXPH5 PE=1 SV=1;tr|E9PPH6|E9PPH6_HUMAN Exophilin-5 (Fragment) OS=Homo sapiens OX=9606	18.545	18.545	23.403	1	1	1	1	1.3	1.3	1.3	61.776	0.090226	5.2751	11092000	1	544		1.3	4	A0A087WZJ0;F5GXG5;E9PPH6;Q8NEV8	A0A087WZJ0;F5GXG5;E9PPH6;Q8NEV8	TRUE	1	1;1;1;1	1;1;1;1	1;1;1;1	1
Low affinity immunoglobulin gamma Fc region receptor III-B	FCGR3B	tr|A0A087WZR4|A0A087WZR4_HUMAN Low affinity immunoglobulin gamma Fc region receptor III-B OS=Homo sapiens OX=9606 GN=FCGR3B PE=1 SV=1;tr|H0Y4U3|H0Y4U3_HUMAN Low affinity immunoglobulin gamma Fc region receptor III-B OS=Homo sapiens OX=9606 GN=FCGR3B PE=1 S	21.9549	21.9549	24.5398	1	4	1	1	16.7	3.7	3.7	24.421	0.071233	5.3448	24390000	1	216		16.7	7	A0A087WZR4;H0Y4U3;A0A3B3ISU3;M9MML6;O75015;E9PNY5;A0A087WU90	A0A087WZR4;H0Y4U3;A0A3B3ISU3;M9MML6;O75015	False;True;False;False	1	4;3;3;3;3;1;1	1;0;0;0;0;1;1	1;0;0;0;0;1;1	4
	TRBV17	tr|A0A087X0K7|A0A087X0K7_HUMAN T cell receptor beta variable 17 (non-functional) (Fragment) OS=Homo sapiens OX=9606 GN=TRBV17 PE=4 SV=6	20.0799	20.0799	22.8873	1	1	1	1	9.6	9.6	9.6	12.963	0.084433	5.3006	7758300	0	114	114	9.6	1	A0A087X0K7	A0A087X0K7	TRUE	1	1	1	1	1
Myosin-7B	MYH7B	tr|A0A087X0T3|A0A087X0T3_HUMAN Myosin-7B OS=Homo sapiens OX=9606 GN=MYH7B PE=1 SV=1;sp|A7E2Y1|MYH7B_HUMAN Myosin-7B OS=Homo sapiens OX=9606 GN=MYH7B PE=1 SV=4	16.9913	16.9913	23.7055	1	1	1	1	0.8	0.8	0.8	225.71	0.052147	5.486	13679000	1	1982		0.8	2	A0A087X0T3;A7E2Y1	A0A087X0T3;A7E2Y1	TRUE	1	1;1	1;1	1;1	1
Growth/differentiation factor 6	GDF6	tr|A0PK22|A0PK22_HUMAN GDF6 protein OS=Homo sapiens OX=9606 GN=GDF6 PE=1 SV=1;tr|A0A087X0X2|A0A087X0X2_HUMAN Growth/differentiation factor 6 OS=Homo sapiens OX=9606 GN=GDF6 PE=1 SV=1;sp|Q6KF10|GDF6_HUMAN Growth/differentiation factor 6 OS=Homo sapiens OX=9	21.3922	21.3922	24.9771	1	1	1	1	8.1	8.1	8.1	29.487	0.043344	5.5036	33026000	2	271		8.1	3	A0PK22;A0A087X0X2;Q6KF10	A0PK22;A0A087X0X2;Q6KF10	TRUE	1	1;1;1	1;1;1	1;1;1	1
Serum amyloid A-4 protein	SAA2-SAA4;SAA4	tr|A0A096LPE2|A0A096LPE2_HUMAN SAA2-SAA4 readthrough OS=Homo sapiens OX=9606 GN=SAA2-SAA4 PE=4 SV=1;sp|P35542|SAA4_HUMAN Serum amyloid A-4 protein OS=Homo sapiens OX=9606 GN=SAA4 PE=1 SV=2	26.3386	26.3386	29.9237	6	9	6	6	42.3	28.8	28.8	23.353	0	52.707	1018400000	18	208		42.3	5	A0A096LPE2;P35542;A0A3B3ISW8;E9PR14;G3V1D9	A0A096LPE2;P35542	True;True;False;False;True;True;False;True;True	6	9;6;3;3;3	6;6;0;0;0	6;6;0;0;0	9
G-protein coupled receptor 161	GPR161	tr|A0A0A0MQW8|A0A0A0MQW8_HUMAN G protein-coupled receptor 161, isoform CRA_b OS=Homo sapiens OX=9606 GN=GPR161 PE=1 SV=1;sp|Q8N6U8|GP161_HUMAN G-protein coupled receptor 161 OS=Homo sapiens OX=9606 GN=GPR161 PE=2 SV=1	20.5215	20.5215	24.7695	1	1	1	1	5.7	5.7	5.7	60.416	0.0925	5.2737	28600000	1	546		5.7	2	A0A0A0MQW8;Q8N6U8	A0A0A0MQW8;Q8N6U8	TRUE	1	1;1	1;1	1;1	1
Ig kappa chain V-III region VG	IGKV3D-11	sp|A0A0A0MRZ8|KVD11_HUMAN Immunoglobulin kappa variable 3D-11 OS=Homo sapiens OX=9606 GN=IGKV3D-11 PE=3 SV=6;sp|P04433|KV311_HUMAN Immunoglobulin kappa variable 3-11 OS=Homo sapiens OX=9606 GN=IGKV3-11 PE=1 SV=1	30.7287	30.7287	32.7286	2	3	2	2	32.2	26.1	26.1	12.625	0	57.425	7117000000	17	115		32.2	2	A0A0A0MRZ8;P04433	A0A0A0MRZ8;P04433	True;False;True	2	3;3	2;2	2;2	3
Ig delta chain C region	IGHD	tr|A0A0A0MS09|A0A0A0MS09_HUMAN Immunoglobulin heavy constant delta (Fragment) OS=Homo sapiens OX=9606 GN=IGHD PE=1 SV=1;sp|P01880|IGHD_HUMAN Immunoglobulin heavy constant delta OS=Homo sapiens OX=9606 GN=IGHD PE=1 SV=3	22.0493	22.0493	26.2192	4	4	4	4	16	16	16	47.428	0	53.614	78123000	8	430		16	2	A0A0A0MS09;P01880	A0A0A0MS09;P01880	True;True;True;True	4	4;4	4;4	4;4	4
	IGHV3-49	sp|A0A0A0MS15|HV349_HUMAN Immunoglobulin heavy variable 3-49 OS=Homo sapiens OX=9606 GN=IGHV3-49 PE=3 SV=1	25.0463	25.0463	27.8536	2	4	3	2	33.6	26.1	16.8	13.056	0	26.701	242540000	9	119	119	33.6	1	A0A0A0MS15	A0A0A0MS15	False;True;True;True	3	4	3	2	4
Complement C1q subcomponent subunit B	C1QB	tr|A0A0A0MSV6|A0A0A0MSV6_HUMAN Complement C1q subcomponent subunit B (Fragment) OS=Homo sapiens OX=9606 GN=C1QB PE=1 SV=6;tr|D6R934|D6R934_HUMAN Complement C1q subcomponent subunit B OS=Homo sapiens OX=9606 GN=C1QB PE=1 SV=1;sp|P02746|C1QB_HUMAN Complement	21.2154	21.2154	24.6749	3	3	3	3	18.9	18.9	18.9	24.03	0	21.899	26784000	6	228		18.9	3	A0A0A0MSV6;D6R934;P02746	A0A0A0MSV6;D6R934;P02746	True;True;True	3	3;3;3	3;3;3	3;3;3	3
Sodium/potassium-transporting ATPase subunit alpha-3;Sodium/potassium-transporting ATPase subunit alpha-2;Sodium/potassium-transporting ATPase subunit alpha-1;Sodium/potassium-transporting ATPase subunit alpha-4;Potassium-transporting ATPase alpha chain 2	ATP1A2;ATP1A3;ATP1A1;ATP1A4;ATP12A	tr|H0Y7C1|H0Y7C1_HUMAN Sodium/potassium-transporting ATPase subunit alpha (Fragment) OS=Homo sapiens OX=9606 GN=ATP1A2 PE=1 SV=1;tr|M0R116|M0R116_HUMAN Sodium/potassium-transporting ATPase subunit alpha OS=Homo sapiens OX=9606 GN=ATP1A3 PE=1 SV=1;tr|B1AKY9	20.6718	20.6718	25.801	1	1	1	1	1.3	1.3	1.3	78.796	0.043478	5.5092	58462000	1	714		1.3	10	H0Y7C1;M0R116;B1AKY9;A0A2R8YEY8;A0A0A0MT26;P13637;P50993;P05023;Q13733;P54707	H0Y7C1;M0R116;B1AKY9;A0A2R8YEY8;A0A0A0MT26;P13637;P50993;P05023;Q13733;P54707	TRUE	1	1;1;1;1;1;1;1;1;1;1	1;1;1;1;1;1;1;1;1;1	1;1;1;1;1;1;1;1;1;1	1
	IGKV6D-21	sp|A0A0A0MT36|KVD21_HUMAN Immunoglobulin kappa variable 6D-21 OS=Homo sapiens OX=9606 GN=IGKV6D-21 PE=3 SV=1	21.5192	21.5192	23.5192	1	3	1	1	36	10.5	10.5	12.34	0.014286	5.8012	12022000	1	114		36	2	A0A0A0MT36;A0A0C4DH26	A0A0A0MT36	False;False;True	1	3;1	1;1	1;1	3
Formin-2	FMN2	tr|A0A0A0MTF8|A0A0A0MTF8_HUMAN Formin-2 OS=Homo sapiens OX=9606 GN=FMN2 PE=1 SV=1;sp|Q9NZ56|FMN2_HUMAN Formin-2 OS=Homo sapiens OX=9606 GN=FMN2 PE=1 SV=4	23.4066	23.4066	26.8661	1	1	1	1	7.6	7.6	7.6	23.415	0.090686	5.2702	122320000	0	198		7.6	2	A0A0A0MTF8;Q9NZ56	A0A0A0MTF8;Q9NZ56	TRUE	1	1;1	1;1	1;1	1
Receptor protein-tyrosine kinase;Ephrin type-A receptor 6	EPHA6	tr|E7EU71|E7EU71_HUMAN Ephrin type-A receptor 6 OS=Homo sapiens OX=9606 GN=EPHA6 PE=1 SV=1;tr|A0A0B4J1T8|A0A0B4J1T8_HUMAN Ephrin type-A receptor 6 OS=Homo sapiens OX=9606 GN=EPHA6 PE=1 SV=1;sp|Q9UF33|EPHA6_HUMAN Ephrin type-A receptor 6 OS=Homo sapiens OX=	23.0959	23.0959	27.5553	1	1	1	1	1.3	1.3	1.3	60.982	0.084881	5.3028	197230000	0	547		1.3	3	E7EU71;A0A0B4J1T8;Q9UF33	E7EU71;A0A0B4J1T8;Q9UF33	TRUE	1	1;1;1	1;1;1	1;1;1	1
	IGLV1-36	sp|A0A0B4J1U3|LV136_HUMAN Immunoglobulin lambda variable 1-36 OS=Homo sapiens OX=9606 GN=IGLV1-36 PE=1 SV=5	21.7923	21.7923	22.7923	1	1	1	1	13.7	13.7	13.7	12.478	0.0037879	6.0795	7263900	1	117	117	13.7	1	A0A0B4J1U3	A0A0B4J1U3	TRUE	1	1	1	1	1
	IGHV6-1	sp|A0A0B4J1U7|HV601_HUMAN Immunoglobulin heavy variable 6-1 OS=Homo sapiens OX=9606 GN=IGHV6-1 PE=3 SV=1	23.8266	23.8266	25.8266	1	1	1	1	5.8	5.8	5.8	13.481	0.063889	5.3537	59508000	1	121	121	5.8	1	A0A0B4J1U7	A0A0B4J1U7	TRUE	1	1	1	1	1
	IGHV3-15	sp|A0A0B4J1V0|HV315_HUMAN Immunoglobulin heavy variable 3-15 OS=Homo sapiens OX=9606 GN=IGHV3-15 PE=3 SV=1	28.8286	28.8286	31.636	7	9	9	7	52.9	52.9	42.9	12.926	0	291.81	3337100000	43	119	119	52.9	1	A0A0B4J1V0	A0A0B4J1V0	True;True;True;True;True;True;True;True;True	9	9	9	7	9
Ig heavy chain V-III region TRO	IGHV3-21	sp|A0A0B4J1V1|HV321_HUMAN Immunoglobulin heavy variable 3-21 OS=Homo sapiens OX=9606 GN=IGHV3-21 PE=1 SV=1;sp|P01762|HV311_HUMAN Immunoglobulin heavy variable 3-11 OS=Homo sapiens OX=9606 GN=IGHV3-11 PE=1 SV=2	19.8306	19.8306	21.8307	1	3	1	1	35	16.2	16.2	12.839	0	13.468	3729800	2	117		35	2	A0A0B4J1V1;P01762	A0A0B4J1V1;P01762	False;True;False	1	3;2	1;0	1;0	3
	IGHV3-74;IGHV3OR16-13	sp|A0A0B4J1X5|HV374_HUMAN Immunoglobulin heavy variable 3-74 OS=Homo sapiens OX=9606 GN=IGHV3-74 PE=3 SV=1;tr|A0A075B7E8|A0A075B7E8_HUMAN Immunoglobulin heavy variable 3/OR16-13 (non-functional) (Fragment) OS=Homo sapiens OX=9606 GN=IGHV3OR16-13 PE=1 SV=1	28.6061	28.6061	31.4134	3	5	4	3	41	41	31.6	12.839	0	66.99	2860100000	19	117		41	3	A0A0B4J1X5;A0A075B7E8;A0A0J9YVY3	A0A0B4J1X5;A0A075B7E8	True;True;True;True;False	4	5;3;1	4;2;1	3;2;0	5
	IGHV3-43	sp|A0A0B4J1X8|HV343_HUMAN Immunoglobulin heavy variable 3-43 OS=Homo sapiens OX=9606 GN=IGHV3-43 PE=3 SV=1	24.5635	24.5635	27.1484	2	3	2	2	34.7	25.4	25.4	13.077	0	36.035	148760000	11	118	118	34.7	1	A0A0B4J1X8	A0A0B4J1X8	True;False;True	2	3	2	2	3
	IGLV9-49	sp|A0A0B4J1Y8|LV949_HUMAN Immunoglobulin lambda variable 9-49 OS=Homo sapiens OX=9606 GN=IGLV9-49 PE=1 SV=1	27.0502	27.0502	29.3722	4	4	4	4	30.1	30.1	30.1	13.024	0	27.409	694870000	12	123	123	30.1	1	A0A0B4J1Y8	A0A0B4J1Y8	True;True;True;True	4	4	4	4	4
	IGHV3-72	sp|A0A0B4J1Y9|HV372_HUMAN Immunoglobulin heavy variable 3-72 OS=Homo sapiens OX=9606 GN=IGHV3-72 PE=3 SV=1	25.4288	25.4288	27.7507	3	6	4	3	58.8	45.4	34.5	13.203	0	58.483	225840000	14	119	119	58.8	1	A0A0B4J1Y9	A0A0B4J1Y9	True;False;False;True;True;True	4	6	4	3	6
Immunoglobulin lambda-like polypeptide 5;Ig lambda-1 chain C regions	IGLL5;IGLC1	tr|A0A0B4J231|A0A0B4J231_HUMAN Immunoglobulin lambda-like polypeptide 5 OS=Homo sapiens OX=9606 GN=IGLL5 PE=1 SV=1;sp|B9A064|IGLL5_HUMAN Immunoglobulin lambda-like polypeptide 5 OS=Homo sapiens OX=9606 GN=IGLL5 PE=2 SV=2;sp|P0CG04|IGLC1_HUMAN Immunoglobuli	29.929	29.929	33.3884	6	15	6	6	51.2	22.8	22.8	23.15	0	53.975	11244000000	59	215		51.2	3	A0A0B4J231;B9A064;P0CG04	A0A0B4J231;B9A064;P0CG04	True;True;True;True;False;False;False;False;False;False;False;True;True;False;False	6	15;15;13	6;6;4	6;6;4	15
	IGHV3OR16-9	tr|A0A0B4J2B5|A0A0B4J2B5_HUMAN Immunoglobulin heavy variable 3/OR16-9 (non-functional) (Fragment) OS=Homo sapiens OX=9606 GN=IGHV3OR16-9 PE=1 SV=1;tr|S4R460|S4R460_HUMAN Immunoglobulin heavy variable 3/OR16-9 (non-functional) OS=Homo sapiens OX=9606 GN=IGH	30.2056	30.2056	32.5275	2	3	3	2	41.8	41.8	30.6	10.657	0	202.11	6190800000	47	98		41.8	3	A0A0B4J2B5;S4R460;A0A0J9YX35	A0A0B4J2B5;S4R460	True;True;True	3	3;2;1	3;2;1	2;1;1	3
	IGKV1D-13	sp|P0DP09|KV113_HUMAN Immunoglobulin kappa variable 1-13 OS=Homo sapiens OX=9606 GN=IGKV1-13 PE=3 SV=1;sp|A0A0B4J2D9|KVD13_HUMAN Immunoglobulin kappa variable 1D-13 OS=Homo sapiens OX=9606 GN=IGKV1D-13 PE=3 SV=1	25.6321	25.6321	27.6321	2	2	2	2	29.1	29.1	29.1	12.569	0	60.662	208010000	8	117		29.1	2	P0DP09;A0A0B4J2D9	P0DP09;A0A0B4J2D9	True;True	2	2;2	2;2	2;2	2
Nesprin-1	SYNE1	tr|F5GXQ8|F5GXQ8_HUMAN Nesprin-1 OS=Homo sapiens OX=9606 GN=SYNE1 PE=1 SV=1;tr|E7ENN3|E7ENN3_HUMAN Nesprin-1 OS=Homo sapiens OX=9606 GN=SYNE1 PE=1 SV=2;tr|A0A0C4DG40|A0A0C4DG40_HUMAN Nesprin-1 OS=Homo sapiens OX=9606 GN=SYNE1 PE=1 SV=1;sp|Q8NF91|SYNE1_HUMA	18.3754	18.3754	24.8348	1	1	1	1	1	1	1	166.12	0.053254	5.4475	29924000	1	1433		1	4	F5GXQ8;E7ENN3;A0A0C4DG40;Q8NF91	F5GXQ8;E7ENN3;A0A0C4DG40;Q8NF91	TRUE	1	1;1;1;1	1;1;1;1	1;1;1;1	1
Putative PDZ domain-containing protein 1P;Na(+)/H(+) exchange regulatory cofactor NHE-RF3	PDZK1;PDZK1P1	tr|A0A0C4DG67|A0A0C4DG67_HUMAN Na(+)/H(+) exchange regulatory cofactor NHE-RF3 (Fragment) OS=Homo sapiens OX=9606 GN=PDZK1 PE=1 SV=1;sp|A8MUH7|PDZ1P_HUMAN Putative PDZ domain-containing protein PDZK1P1 OS=Homo sapiens OX=9606 GN=PDZK1P1 PE=5 SV=2;sp|Q5T2W1	22.8947	22.8947	26.8016	1	1	1	1	6.1	6.1	6.1	29.56	0.032895	5.6068	116970000	1	264		6.1	3	A0A0C4DG67;A8MUH7;Q5T2W1	A0A0C4DG67;A8MUH7;Q5T2W1	TRUE	1	1;1;1	1;1;1	1;1;1	1
Actin-binding LIM protein 3	ABLIM3	tr|D6RHE7|D6RHE7_HUMAN Actin-binding LIM protein 3 OS=Homo sapiens OX=9606 GN=ABLIM3 PE=1 SV=1;tr|A0A0C4DGA7|A0A0C4DGA7_HUMAN Actin-binding LIM protein 3 OS=Homo sapiens OX=9606 GN=ABLIM3 PE=1 SV=1;sp|O94929|ABLM3_HUMAN Actin-binding LIM protein 3 OS=Homo	21.932	21.932	24.7393	1	1	1	1	9.9	9.9	9.9	16.907	0.052478	5.4249	28008000	1	151		9.9	3	D6RHE7;A0A0C4DGA7;O94929	D6RHE7;A0A0C4DGA7;O94929	TRUE	1	1;1;1	1;1;1	1;1;1	1
	IGKV6-21	sp|A0A0C4DH24|KV621_HUMAN Immunoglobulin kappa variable 6-21 OS=Homo sapiens OX=9606 GN=IGKV6-21 PE=3 SV=1	24.9118	24.9118	26.9118	1	3	3	1	36	36	10.5	12.43	0	29.252	126260000	5	114	114	36	1	A0A0C4DH24	A0A0C4DH24	True;True;True	3	3	3	1	3
	IGHV3-20	sp|A0A0C4DH32|HV320_HUMAN Immunoglobulin heavy variable 3-20 OS=Homo sapiens OX=9606 GN=IGHV3-20 PE=3 SV=2	26.0166	26.0166	28.6016	1	2	1	1	18.8	9.4	9.4	12.673	0	48.457	407330000	4	117	117	18.8	1	A0A0C4DH32	A0A0C4DH32	True;False	1	2	1	1	2
	IGHV4-28	sp|A0A0C4DH34|HV428_HUMAN Immunoglobulin heavy variable 4-28 OS=Homo sapiens OX=9606 GN=IGHV4-28 PE=3 SV=1	19.377	19.377	21.377	1	1	1	1	7.7	7.7	7.7	13.124	0.032051	5.5673	2723500	1	117	117	7.7	1	A0A0C4DH34	A0A0C4DH34	TRUE	1	1	1	1	1
	IGHV3-35	tr|A0A0C4DH35|A0A0C4DH35_HUMAN Immunoglobulin heavy variable 3-35 (non-functional) (Fragment) OS=Homo sapiens OX=9606 GN=IGHV3-35 PE=1 SV=1	26.9143	26.9143	29.7217	2	2	2	2	16.2	16.2	16.2	12.81	0	28.545	885360000	8	117	117	16.2	1	A0A0C4DH35	A0A0C4DH35	True;True	2	2	2	2	2
	IGHV3-38	tr|A0A0C4DH36|A0A0C4DH36_HUMAN Immunoglobulin heavy variable 3-38 (non-functional) (Fragment) OS=Homo sapiens OX=9606 GN=IGHV3-38 PE=1 SV=1	24.3523	24.3523	26.9373	2	2	2	2	19	19	19	12.758	0	45.83	128510000	6	116	116	19	1	A0A0C4DH36	A0A0C4DH36	True;True	2	2	2	2	2
	IGHV5-51	sp|A0A0C4DH38|HV551_HUMAN Immunoglobulin heavy variable 5-51 OS=Homo sapiens OX=9606 GN=IGHV5-51 PE=3 SV=1;sp|A0A0J9YXX1|HV5X1_HUMAN Immunoglobulin heavy variable 5-10-1 OS=Homo sapiens OX=9606 GN=IGHV5-10-1 PE=3 SV=1	23.7624	23.7624	26.3474	4	4	4	4	47	47	47	12.674	0	39.301	85380000	7	117		47	2	A0A0C4DH38;A0A0J9YXX1	A0A0C4DH38;A0A0J9YXX1	True;True;True;True	4	4;2	4;2	4;2	4
Ig heavy chain V-III region BUT;Ig heavy chain V-III region KOL	IGHV3-66	sp|A0A0C4DH42|HV366_HUMAN Immunoglobulin heavy variable 3-66 OS=Homo sapiens OX=9606 GN=IGHV3-66 PE=3 SV=1;sp|P01767|HV353_HUMAN Immunoglobulin heavy variable 3-53 OS=Homo sapiens OX=9606 GN=IGHV3-53 PE=1 SV=2;sp|P0DP02|HVC33_HUMAN Immunoglobulin heavy var	22.1218	22.1218	24.7067	1	4	1	1	38.8	16.4	16.4	12.698	0	15.309	27382000	4	116		38.8	4	A0A0C4DH42;P01767;P0DP02;P01772	A0A0C4DH42;P01767;P0DP02;P01772	False;False;True;False	1	4;4;3;3	1;1;0;0	1;1;0;0	4
		tr|A0A0J9YVU5|A0A0J9YVU5_HUMAN Immunoglobulin heavy variable 2-70 (Fragment) OS=Homo sapiens OX=9606 GN=IGHV2-70 PE=1 SV=1;sp|A0A0C4DH43|HV70D_HUMAN Immunoglobulin heavy variable 2-70D OS=Homo sapiens OX=9606 GN=IGHV2-70D PE=3 SV=1	24.1149	24.1149	26.6999	1	1	1	1	5.9	5.9	5.9	13.358	0.053571	5.4513	109010000	2	119		5.9	2	A0A0J9YVU5;A0A0C4DH43	A0A0J9YVU5;A0A0C4DH43	TRUE	1	1;1	1;1	1;1	1
	IGKV1-8;IGKV1-9	sp|A0A0C4DH67|KV108_HUMAN Immunoglobulin kappa variable 1-8 OS=Homo sapiens OX=9606 GN=IGKV1-8 PE=3 SV=1;sp|A0A0C4DH69|KV109_HUMAN Immunoglobulin kappa variable 1-9 OS=Homo sapiens OX=9606 GN=IGKV1-9 PE=3 SV=1	25.9537	25.9537	27.9537	2	3	3	2	42.6	42.6	28.7	12.537	0	54.668	259960000	13	115		42.6	2	A0A0C4DH67;A0A0C4DH69	A0A0C4DH67;A0A0C4DH69	True;True;True	3	3;2	3;2	2;1	3
	IGKV1-6	sp|A0A0C4DH72|KV106_HUMAN Immunoglobulin kappa variable 1-6 OS=Homo sapiens OX=9606 GN=IGKV1-6 PE=3 SV=1	25.7137	25.7137	27.7137	0	3	1	0	26.5	13.7	0	12.697	0	51.005	220120000	10	117	117	26.5	1	A0A0C4DH72	A0A0C4DH72	True;False;False	1	3	1	0	3
Ig kappa chain V-I region Wes	IGKV1-12	sp|A0A0C4DH73|KV112_HUMAN Immunoglobulin kappa variable 1-12 OS=Homo sapiens OX=9606 GN=IGKV1-12 PE=3 SV=1;sp|P01611|KVD12_HUMAN Immunoglobulin kappa variable 1D-12 OS=Homo sapiens OX=9606 GN=IGKV1D-12 PE=1 SV=2	23.8698	23.8698	25.8697	1	2	1	1	29.1	15.4	15.4	12.645	0	10.71	61315000	2	117		29.1	2	A0A0C4DH73;P01611	A0A0C4DH73;P01611	True;False	1	2;2	1;1	1;1	2
Solute carrier family 12 member 5	SLC12A5	tr|A0A0D9SF89|A0A0D9SF89_HUMAN Solute carrier family 12 member 5 OS=Homo sapiens OX=9606 GN=SLC12A5 PE=4 SV=1;tr|A0A0D9SGD0|A0A0D9SGD0_HUMAN HCG1821261 OS=Homo sapiens OX=9606 GN=SLC12A5 PE=4 SV=1;sp|Q9H2X9|S12A5_HUMAN Solute carrier family 12 member 5 OS=	24.1409	24.1409	26.4629	1	1	1	1	13.2	13.2	13.2	5.7874	0.053731	5.4513	92496000	1	53		13.2	3	A0A0D9SF89;A0A0D9SGD0;Q9H2X9	A0A0D9SF89;A0A0D9SGD0;Q9H2X9	TRUE	1	1;1;1	1;1;1	1;1;1	1
Complement C2;Complement C2b fragment;Complement C2a fragment	C2	tr|B4DQI1|B4DQI1_HUMAN Complement C2 OS=Homo sapiens OX=9606 GN=C2 PE=1 SV=1;tr|A0A0G2JIE7|A0A0G2JIE7_HUMAN Complement C2 OS=Homo sapiens OX=9606 GN=C2 PE=1 SV=1;tr|H0Y3H6|H0Y3H6_HUMAN Complement C2 (Fragment) OS=Homo sapiens OX=9606 GN=C2 PE=1 SV=1;tr|A0A	21.4254	21.4254	26.4698	2	2	2	2	4	4	4	56.466	0	40.582	92940000	4	506		4	5	B4DQI1;A0A0G2JIE7;H0Y3H6;A0A0G2JL69;P06681	B4DQI1;A0A0G2JIE7;H0Y3H6;A0A0G2JL69;P06681	True;True	2	2;2;2;2;2	2;2;2;2;2	2;2;2;2;2	2
Ig alpha-2 chain C region	IGHA2	tr|A0A0G2JMB2|A0A0G2JMB2_HUMAN Immunoglobulin heavy constant alpha 2 (Fragment) OS=Homo sapiens OX=9606 GN=IGHA2 PE=1 SV=1;tr|A0A286YEY5|A0A286YEY5_HUMAN Immunoglobulin heavy constant alpha 2 (Fragment) OS=Homo sapiens OX=9606 GN=IGHA2 PE=1 SV=1;sp|P01877|	25.793	25.793	29.6003	4	16	4	4	65.3	30.9	30.9	36.508	0	183.77	813920000	31	340		65.3	3	A0A0G2JMB2;A0A286YEY5;P01877	A0A0G2JMB2;A0A286YEY5;P01877	True;True;False;False;False;True;False;True;False;False;False;False;False;False;False;False	4	16;12;12	4;3;3	4;3;3	16
Alpha-2-antiplasmin	SERPINF2	tr|A0A0G2JPA8|A0A0G2JPA8_HUMAN Alpha-2-antiplasmin OS=Homo sapiens OX=9606 GN=SERPINF2 PE=1 SV=1;sp|P08697|A2AP_HUMAN Alpha-2-antiplasmin OS=Homo sapiens OX=9606 GN=SERPINF2 PE=1 SV=3	22.4368	22.4368	26.3437	3	3	3	3	6.3	6.3	6.3	47.936	0	17.489	85160000	5	427		6.3	2	A0A0G2JPA8;P08697	A0A0G2JPA8;P08697	True;True;True	3	3;3	3;3	3;3	3
Complement C4-A;Complement C4 beta chain;Complement C4-A alpha chain;C4a anaphylatoxin;C4b-A;C4d-A;Complement C4 gamma chain;Complement C4-B;Complement C4 beta chain;Complement C4-B alpha chain;C4a anaphylatoxin;C4b-B;C4d-B;Complement C4 gamma chain	C4A;C4B	tr|A0A140TA49|A0A140TA49_HUMAN Complement C4-A OS=Homo sapiens OX=9606 GN=C4A PE=1 SV=1;tr|A0A140TA44|A0A140TA44_HUMAN Complement C4-A OS=Homo sapiens OX=9606 GN=C4A PE=1 SV=1;tr|A0A140TA32|A0A140TA32_HUMAN Complement C4-A OS=Homo sapiens OX=9606 GN=C4A PE	21.1409	21.1409	27.4077	14	14	14	14	11.9	11.9	11.9	187.79	0	139.01	178050000	18	1698		11.9	13	A0A140TA49;A0A140TA44;A0A140TA32;A0A0G2JPR0;P0C0L4;F5GXS0;A0A140TA29;A0A0G2JL54;P0C0L5;A0A3B3ISA6;A0A3B3ISD7;CON__P01030;CON__ENSEMBL:ENSBTAP00000007350	A0A140TA49;A0A140TA44;A0A140TA32;A0A0G2JPR0;P0C0L4;F5GXS0;A0A140TA29;A0A0G2JL54;P0C0L5;A0A3B3ISA6	True;True;True;True;True;True;True;True;True;True;True;True;True;True	14	14;14;14;14;14;13;13;13;13;9;2;1;1	14;14;14;14;14;13;13;13;13;9;2;1;1	14;14;14;14;14;13;13;13;13;9;2;1;1	14
		tr|A0A0G2JRQ6|A0A0G2JRQ6_HUMAN Uncharacterized protein (Fragment) OS=Homo sapiens OX=9606 PE=1 SV=4	26.9195	26.9195	29.2414	3	3	3	3	29.1	29.1	29.1	12.748	0	18.914	634650000	6	117	117	29.1	1	A0A0G2JRQ6	A0A0G2JRQ6	True;True;True	3	3	3	3	3
Histone H2A type 1;Histone H2A type 1-H;Histone H2A type 1-J;Histone H2A type 2-C;Histone H2A.J;Histone H2A type 2-A;Histone H2A type 1-D;Histone H2A;Histone H2AX;Histone H2A type 1-A	HIST1H2AG;HIST1H2AH;HIST1H2AJ;HIST2H2AC;H2AFJ;HIST2H2AA3;HIST1H2AD;H2AFX;HIST1H2AA	sp|P0C0S8|H2A1_HUMAN Histone H2A type 1 OS=Homo sapiens OX=9606 GN=HIST1H2AG PE=1 SV=2;tr|A0A0U1RRH7|A0A0U1RRH7_HUMAN Histone H2A OS=Homo sapiens OX=9606 PE=3 SV=1;sp|Q96KK5|H2A1H_HUMAN Histone H2A type 1-H OS=Homo sapiens OX=9606 GN=HIST1H2AH PE=1 SV=3;tr	27.1916	27.1916	29.5135	1	6	6	1	35.4	35.4	8.5	14.091	0	65.736	766390000	11	130		35.4	25	P0C0S8;A0A0U1RRH7;Q96KK5;A0A0U1RR32;Q99878;Q16777;Q9BTM1;Q6FI13;P20671;H0YFX9;P16104;Q96QV6;A0A3B3IS11;A0A494C189;C9J0D1;Q8IUE6;Q71UI9;P0C0S5;REV__Q8NB25;REV__H0Y672;REV__E7EQ67;REV__H7BY63;REV__H0YBA5;REV__A0A087X2A7;C9J386	P0C0S8;A0A0U1RRH7;Q96KK5;A0A0U1RR32;Q99878;Q16777;Q9BTM1;Q6FI13;P20671;H0YFX9;P16104;Q96QV6;A0A3B3IS11	True;True;True;True;True;True	6	6;6;6;6;6;6;6;6;6;5;4;4;4;2;2;2;2;2;1;1;1;1;1;1;1	6;6;6;6;6;6;6;6;6;5;4;4;4;2;2;2;2;2;1;1;1;1;1;1;1	1;1;1;1;1;1;1;1;1;1;0;0;0;0;0;0;0;0;0;0;0;0;0;0;0	6
FACT complex subunit SSRP1	SSRP1	tr|A0A0U1RRK2|A0A0U1RRK2_HUMAN FACT complex subunit SSRP1 (Fragment) OS=Homo sapiens OX=9606 GN=SSRP1 PE=1 SV=1;sp|Q08945|SSRP1_HUMAN FACT complex subunit SSRP1 OS=Homo sapiens OX=9606 GN=SSRP1 PE=1 SV=1	21.4387	21.4387	23.4386	1	1	1	1	4.4	4.4	4.4	25.778	0.053892	5.4535	11369000	0	225		4.4	2	A0A0U1RRK2;Q08945	A0A0U1RRK2;Q08945	TRUE	1	1;1	1;1	1;1	1
Cathepsin D;Cathepsin D light chain;Cathepsin D heavy chain	CTSD	tr|A0A1B0GV01|A0A1B0GV01_HUMAN Cathepsin D (Fragment) OS=Homo sapiens OX=9606 GN=CTSD PE=1 SV=1;tr|F8W787|F8W787_HUMAN Cathepsin D (Fragment) OS=Homo sapiens OX=9606 GN=CTSD PE=1 SV=1;tr|F8WD96|F8WD96_HUMAN Cathepsin D OS=Homo sapiens OX=9606 GN=CTSD PE=1	19.2207	19.2207	20.8057	1	1	1	1	11.7	11.7	11.7	10.217	0.091371	5.278	1832900	0	94		11.7	12	A0A1B0GV01;F8W787;F8WD96;C9JH19;A0A1B0GW44;A0A1B0GVP3;A0A1B0GV23;A0A1B0GVD5;A0A1B0GWE8;A0A1B0GU92;A0A1B0GU03;P07339	A0A1B0GV01;F8W787;F8WD96;C9JH19;A0A1B0GW44;A0A1B0GVP3;A0A1B0GV23;A0A1B0GVD5;A0A1B0GWE8;A0A1B0GU92;A0A1B0GU03;P07339	TRUE	1	1;1;1;1;1;1;1;1;1;1;1;1	1;1;1;1;1;1;1;1;1;1;1;1	1;1;1;1;1;1;1;1;1;1;1;1	1
Ig mu chain C region	IGHM	tr|A0A1B0GUU9|A0A1B0GUU9_HUMAN Immunoglobulin heavy constant mu (Fragment) OS=Homo sapiens OX=9606 GN=IGHM PE=1 SV=1;sp|P01871|IGHM_HUMAN Immunoglobulin heavy constant mu OS=Homo sapiens OX=9606 GN=IGHM PE=1 SV=4	25.6684	25.6684	30.2534	15	15	15	15	33.3	33.3	33.3	51.923	0	268.05	1279900000	40	474		33.3	2	A0A1B0GUU9;P01871	A0A1B0GUU9;P01871	True;True;True;True;True;True;True;True;True;True;True;True;True;True;True	15	15;15	15;15	15;15	15
Ig alpha-1 chain C region	IGHA1	tr|A0A286YEY1|A0A286YEY1_HUMAN Immunoglobulin heavy constant alpha 1 (Fragment) OS=Homo sapiens OX=9606 GN=IGHA1 PE=1 SV=1;sp|P01876|IGHA1_HUMAN Immunoglobulin heavy constant alpha 1 OS=Homo sapiens OX=9606 GN=IGHA1 PE=1 SV=2	30.8498	30.8498	34.6572	6	18	18	6	51.8	51.8	22.4	42.848	0	323.31	27093000000	143	398		51.8	2	A0A286YEY1;P01876	A0A286YEY1;P01876	True;True;True;True;True;True;True;True;True;True;True;True;True;True;True;True;True;True	18	18;18	18;18	6;6	18
Ig gamma-4 chain C region	IGHG4	tr|A0A286YFJ8|A0A286YFJ8_HUMAN Immunoglobulin heavy constant gamma 4 (Fragment) OS=Homo sapiens OX=9606 GN=IGHG4 PE=1 SV=1;sp|P01861|IGHG4_HUMAN Immunoglobulin heavy constant gamma 4 OS=Homo sapiens OX=9606 GN=IGHG4 PE=1 SV=1	27.668	27.668	31.5749	7	14	7	7	47.5	26.3	26.3	43.831	0	104.44	3198900000	40	396		47.5	2	A0A286YFJ8;P01861	A0A286YFJ8;P01861	False;True;False;False;True;False;False;True;True;True;False;False;True;True	7	14;14	7;7	7;7	14
Ig kappa chain V-I region AU;Ig kappa chain V-I region AG		tr|A0A2Q2TTZ9|A0A2Q2TTZ9_HUMAN Immunoglobulin kappa variable 1-33 OS=Homo sapiens OX=9606 GN=IGKV1D-33 PE=1 SV=1;sp|P01594|KV133_HUMAN Immunoglobulin kappa variable 1-33 OS=Homo sapiens OX=9606 GN=IGKV1-33 PE=1 SV=2;sp|P01593|KVD33_HUMAN Immunoglobulin kap	29.9755	29.9755	31.9756	4	4	4	4	56.5	56.5	56.5	11.842	0	292.77	4222900000	35	108		56.5	3	A0A2Q2TTZ9;P01594;P01593	A0A2Q2TTZ9;P01594;P01593	True;True;True;True	4	4;3;3	4;3;3	4;3;3	4
40S ribosomal protein S7	RPS7	tr|A0A2R8Y623|A0A2R8Y623_HUMAN 40S ribosomal protein S7 (Fragment) OS=Homo sapiens OX=9606 GN=RPS7 PE=1 SV=1;tr|B5MCP9|B5MCP9_HUMAN 40S ribosomal protein S7 OS=Homo sapiens OX=9606 GN=RPS7 PE=1 SV=1;sp|P62081|RS7_HUMAN 40S ribosomal protein S7 OS=Homo sapi	20.1807	20.1807	23.3507	1	1	1	1	13	13	13	19.405	0.014545	5.8426	10697000	1	169		13	3	A0A2R8Y623;B5MCP9;P62081	A0A2R8Y623;B5MCP9;P62081	TRUE	1	1;1;1	1;1;1	1;1;1	1
40S ribosomal protein S14	RPS14	tr|E5RH77|E5RH77_HUMAN 40S ribosomal protein S14 OS=Homo sapiens OX=9606 GN=RPS14 PE=1 SV=1;tr|A0A2R8Y811|A0A2R8Y811_HUMAN 40S ribosomal protein S14 (Fragment) OS=Homo sapiens OX=9606 GN=RPS14 PE=1 SV=1;sp|P62263|RS14_HUMAN 40S ribosomal protein S14 OS=Hom	21.3699	21.3699	22.9548	1	1	1	1	8.2	8.2	8.2	14.295	0.059322	5.383	8130100	1	134		8.2	3	E5RH77;A0A2R8Y811;P62263	E5RH77;A0A2R8Y811;P62263	TRUE	1	1;1;1	1;1;1	1;1;1	1
Chromodomain-helicase-DNA-binding protein 8	CHD8	tr|H0YJG4|H0YJG4_HUMAN Chromodomain-helicase-DNA-binding protein 8 (Fragment) OS=Homo sapiens OX=9606 GN=CHD8 PE=1 SV=2;tr|A0A2R8Y840|A0A2R8Y840_HUMAN Chromodomain-helicase-DNA-binding protein 8 (Fragment) OS=Homo sapiens OX=9606 GN=CHD8 PE=1 SV=1;sp|Q9HCK	19.2433	19.2433	25.5831	1	1	1	1	2.3	2.3	2.3	207.68	0.088083	5.2925	50268000	1	1815		2.3	3	H0YJG4;A0A2R8Y840;Q9HCK8	H0YJG4;A0A2R8Y840;Q9HCK8	TRUE	1	1;1;1	1;1;1	1;1;1	1
Glutamine synthetase	GLUL	tr|A0A2R8YDT1|A0A2R8YDT1_HUMAN Glutamine synthetase OS=Homo sapiens OX=9606 GN=GLUL PE=1 SV=1;sp|P15104|GLNA_HUMAN Glutamine synthetase OS=Homo sapiens OX=9606 GN=GLUL PE=1 SV=4	17.3173	17.3173	21.5652	2	2	2	2	3.2	3.2	3.2	57.174	0	10.765	3102900	3	507		3.2	2	A0A2R8YDT1;P15104	A0A2R8YDT1;P15104	True;True	2	2;2	2;2	2;2	2
		tr|A0A2R8YET8|A0A2R8YET8_HUMAN DnaJ homolog subfamily C member 21 OS=Homo sapiens OX=9606 GN=DNAJC21 PE=4 SV=1	21.5854	21.5854	21.5854	1	1	1	1	7.9	7.9	7.9	10.253	0.088773	5.295	3146700	1	89	89	7.9	1	A0A2R8YET8	A0A2R8YET8	TRUE	1	1	1	1	1
Complement factor H-related protein 2	CFHR2	tr|V9GYE7|V9GYE7_HUMAN Complement factor H-related protein 2 OS=Homo sapiens OX=9606 GN=CFHR2 PE=1 SV=1;tr|A0A3B3IQ51|A0A3B3IQ51_HUMAN Complement factor H-related protein 2 OS=Homo sapiens OX=9606 GN=CFHR2 PE=1 SV=1;sp|P36980|FHR2_HUMAN Complement factor H	20.7035	20.7035	24.6104	2	3	2	2	14.2	9.1	9.1	28.912	0	16.029	25614000	4	254		14.2	7	V9GYE7;A0A3B3IQ51;P36980;A0A3B3IRW0;A0A3B3ISW6;A0A3B3IS00;A0A3B3IS28	V9GYE7;A0A3B3IQ51;P36980;A0A3B3IRW0;A0A3B3ISW6;A0A3B3IS00	True;False;True	2	3;3;3;2;2;2;1	2;2;2;1;2;1;1	2;2;2;1;2;1;1	3
		tr|A0A3B3ISW0|A0A3B3ISW0_HUMAN Calsyntenin-3 OS=Homo sapiens OX=9606 GN=CLSTN3 PE=1 SV=1;tr|A0A3B3IRF8|A0A3B3IRF8_HUMAN Calsyntenin-3 OS=Homo sapiens OX=9606 GN=CLSTN3 PE=1 SV=1	21.5181	21.5181	25.6055	1	1	1	1	5.1	5.1	5.1	38.309	0.051988	5.4822	51054000	1	355		5.1	2	A0A3B3ISW0;A0A3B3IRF8	A0A3B3ISW0;A0A3B3IRF8	TRUE	1	1;1	1;1	1;1	1
Complement C1r subcomponent;Complement C1r subcomponent heavy chain;Complement C1r subcomponent light chain	C1R	tr|A0A3B3ITU4|A0A3B3ITU4_HUMAN Complement C1r subcomponent (Fragment) OS=Homo sapiens OX=9606 GN=C1R PE=1 SV=1;tr|F5H2D0|F5H2D0_HUMAN Complement C1r subcomponent OS=Homo sapiens OX=9606 GN=C1R PE=1 SV=3;tr|A0A3B3ISR2|A0A3B3ISR2_HUMAN Complement C1r subcomp	24.1159	24.1159	28.2034	4	4	4	4	12.5	12.5	12.5	39.779	0	32.127	309070000	12	351		12.5	7	A0A3B3ITU4;F5H2D0;A0A3B3ISR2;B4DPQ0;P00736;H0YFL7;Q9NZP8	A0A3B3ITU4;F5H2D0;A0A3B3ISR2;B4DPQ0;P00736	True;True;True;True	4	4;4;4;4;4;1;1	4;4;4;4;4;1;1	4;4;4;4;4;1;1	4
Thyroid hormone receptor-associated protein 3	THRAP3	tr|A0A3B3ITZ9|A0A3B3ITZ9_HUMAN Thyroid hormone receptor-associated protein 3 OS=Homo sapiens OX=9606 GN=THRAP3 PE=1 SV=1;sp|Q9Y2W1|TR150_HUMAN Thyroid hormone receptor-associated protein 3 OS=Homo sapiens OX=9606 GN=THRAP3 PE=1 SV=2	22.8639	22.8639	28.2215	1	1	1	1	1.2	1.2	1.2	103.52	0.020202	5.6512	312970000	2	910		1.2	2	A0A3B3ITZ9;Q9Y2W1	A0A3B3ITZ9;Q9Y2W1	TRUE	1	1;1	1;1	1;1	1
Ig lambda-7 chain C region	IGLC7	sp|A0M8Q6|IGLC7_HUMAN Immunoglobulin lambda constant 7 OS=Homo sapiens OX=9606 GN=IGLC7 PE=1 SV=3	26.2401	26.2401	29.0475	2	7	2	2	66	18.9	18.9	11.253	0	28.555	554840000	8	106	106	66	1	A0M8Q6	A0M8Q6	False;False;False;True;True;False;False	2	7	2	2	7
Myosin-14	MYH14	tr|A1L2Z2|A1L2Z2_HUMAN MYH14 protein OS=Homo sapiens OX=9606 GN=MYH14 PE=1 SV=1;sp|Q7Z406|MYH14_HUMAN Myosin-14 OS=Homo sapiens OX=9606 GN=MYH14 PE=1 SV=2	19.7399	19.7399	24.74	1	1	1	1	2.5	2.5	2.5	73.404	0.08377	5.2963	28020000	1	638		2.5	2	A1L2Z2;Q7Z406	A1L2Z2;Q7Z406	TRUE	1	1;1	1;1	1;1	1
40S ribosomal protein S6	RPS6	tr|A2A3R7|A2A3R7_HUMAN 40S ribosomal protein S6 OS=Homo sapiens OX=9606 GN=RPS6 PE=1 SV=1;sp|P62753|RS6_HUMAN 40S ribosomal protein S6 OS=Homo sapiens OX=9606 GN=RPS6 PE=1 SV=1				1	1	1	1	8.8	8.8	8.8	10.415	0.029703	5.6223	0	1	91		8.8	2	A2A3R7;P62753	A2A3R7;P62753	TRUE	1	1;1	1;1	1;1	1
Pleckstrin homology domain-containing family D member 1	PLEKHD1	sp|A6NEE1|PLHD1_HUMAN Pleckstrin homology domain-containing family D member 1 OS=Homo sapiens OX=9606 GN=PLEKHD1 PE=2 SV=3	20.7794	20.7794	25.4232	1	1	1	1	1.4	1.4	1.4	59.203	0.084211	5.3005	44994000	0	506	506	1.4	1	A6NEE1	A6NEE1	TRUE	1	1	1	1	1
Ankyrin repeat domain-containing protein 61	ANKRD61	sp|A6NGH8|ANR61_HUMAN Ankyrin repeat domain-containing protein 61 OS=Homo sapiens OX=9606 GN=ANKRD61 PE=4 SV=2				1	1	1	1	3.6	3.6	3.6	46.14	0.092269	5.2734	0	1	418	418	3.6	1	A6NGH8	A6NGH8	TRUE	1	1	1	1	1
Putative methyl-CpG-binding domain protein 3-like 5	MBD3L5	sp|A6NJ08|MB3L5_HUMAN Putative methyl-CpG-binding domain protein 3-like 5 OS=Homo sapiens OX=9606 GN=MBD3L5 PE=5 SV=1	23.852	23.852	26.6593	1	1	1	1	8.2	8.2	8.2	22.976	0.0037594	5.9949	105990000	1	208	208	8.2	1	A6NJ08	A6NJ08	TRUE	1	1	1	1	1
Annexin;Annexin A2;Putative annexin A2-like protein	ANXA2;ANXA2P2	tr|H0YLE2|H0YLE2_HUMAN Annexin A2 (Fragment) OS=Homo sapiens OX=9606 GN=ANXA2 PE=1 SV=1;tr|H0YN52|H0YN52_HUMAN Annexin (Fragment) OS=Homo sapiens OX=9606 GN=ANXA2 PE=1 SV=1;tr|H0YNA0|H0YNA0_HUMAN Annexin (Fragment) OS=Homo sapiens OX=9606 GN=ANXA2 PE=1 SV=	21.7435	21.7435	22.7435	1	1	1	1	22.2	22.2	22.2	5.2789	0.026667	5.6292	7022500	1	45		22.2	14	H0YLE2;H0YN52;H0YNA0;H0YN28;H0YL33;H0YMM1;H0YNP5;H0YKS4;H0YMD0;H0YMU9;H0YM50;H0YN42;P07355;A6NMY6	H0YLE2;H0YN52;H0YNA0;H0YN28;H0YL33;H0YMM1;H0YNP5;H0YKS4;H0YMD0;H0YMU9;H0YM50;H0YN42;P07355;A6NMY6	TRUE	1	1;1;1;1;1;1;1;1;1;1;1;1;1;1	1;1;1;1;1;1;1;1;1;1;1;1;1;1	1;1;1;1;1;1;1;1;1;1;1;1;1;1	1
Gap junction epsilon-1 protein	GJE1	sp|A6NN92|CXE1_HUMAN Putative gap junction epsilon-1 protein OS=Homo sapiens OX=9606 GN=GJE1 PE=5 SV=1	22.0552	22.0552	25.2251	1	1	1	1	17.1	17.1	17.1	23.755	0.091358	5.2707	39221000	1	205	205	17.1	1	A6NN92	A6NN92	TRUE	1	1	1	1	1
Insulin-like growth factor-binding protein 3	IGFBP3	tr|A6XND1|A6XND1_HUMAN Insulin-like growth factor binding protein 3 isoform b OS=Homo sapiens OX=9606 GN=IGFBP3 PE=1 SV=1;tr|A6XND0|A6XND0_HUMAN Insulin-like growth factor-binding protein 3 OS=Homo sapiens OX=9606 GN=IGFBP3 PE=1 SV=1;sp|P17936|IBP3_HUMAN I	19.1718	19.1718	23.1718	2	2	2	2	9.9	9.9	9.9	28.98	0	11.245	9449500	2	263		9.9	7	A6XND1;A6XND0;P17936;C9JMX4;H0Y485;H0Y5K2;B3KWK7	A6XND1;A6XND0;P17936;C9JMX4;H0Y485;H0Y5K2;B3KWK7	True;True	2	2;2;2;1;1;1;1	2;2;2;1;1;1;1	2;2;2;1;1;1;1	2
Apolipoprotein B-100;Apolipoprotein B-48	APOB	tr|A8MUN2|A8MUN2_HUMAN Apolipoprotein B-100 OS=Homo sapiens OX=9606 GN=APOB PE=1 SV=2;sp|P04114|APOB_HUMAN Apolipoprotein B-100 OS=Homo sapiens OX=9606 GN=APOB PE=1 SV=2	19.0223	19.0223	24.5459	4	4	4	4	7.2	7.2	7.2	92.618	0	22.031	24494000	3	828		7.2	2	A8MUN2;P04114	A8MUN2;P04114	True;True;True;True	4	4;4	4;4	4;4	4
60S ribosomal protein L23a	RPL23A	tr|H7BY10|H7BY10_HUMAN 60S ribosomal protein L23a (Fragment) OS=Homo sapiens OX=9606 GN=RPL23A PE=1 SV=1;tr|K7EJV9|K7EJV9_HUMAN 60S ribosomal protein L23a (Fragment) OS=Homo sapiens OX=9606 GN=RPL23A PE=1 SV=1;tr|K7ERT8|K7ERT8_HUMAN 60S ribosomal protein L	20.5399	20.5399	23.3473	1	1	1	1	6.3	6.3	6.3	17.692	0.02027	5.6583	10672000	2	158		6.3	5	H7BY10;K7EJV9;K7ERT8;A8MUS3;P62750	H7BY10;K7EJV9;K7ERT8;A8MUS3;P62750	TRUE	1	1;1;1;1;1	1;1;1;1;1	1;1;1;1;1	1
Apolipoprotein C-III	APOC3	tr|B0YIW2|B0YIW2_HUMAN Apolipoprotein C-III OS=Homo sapiens OX=9606 GN=APOC3 PE=1 SV=1;sp|P02656|APOC3_HUMAN Apolipoprotein C-III OS=Homo sapiens OX=9606 GN=APOC3 PE=1 SV=1	28.5174	28.5174	31.3248	7	7	7	7	49.6	49.6	49.6	12.815	0	218.22	2689600000	23	117		49.6	2	B0YIW2;P02656	B0YIW2;P02656	True;True;True;True;True;True;True	7	7;7	7;7	7;7	7
Fibulin-1	FBLN1	tr|B1AHL2|B1AHL2_HUMAN Fibulin-1 OS=Homo sapiens OX=9606 GN=FBLN1 PE=1 SV=1	20.3408	20.3408	25.295	2	9	2	2	20.1	6.8	6.8	78.329	0	11.997	41167000	4	721		20.1	3	B1AHL2;H7C1M6;CON__ENSEMBL:ENSBTAP00000016046	B1AHL2	False;False;False;False;True;False;True;False;False	2	9;2;2	2;0;0	2;0;0	9
Microfibrillar-associated protein 5	MFAP5	tr|H0YGS3|H0YGS3_HUMAN Microfibrillar-associated protein 5 (Fragment) OS=Homo sapiens OX=9606 GN=MFAP5 PE=1 SV=1;tr|F5H7Z2|F5H7Z2_HUMAN Microfibrillar-associated protein 5 OS=Homo sapiens OX=9606 GN=MFAP5 PE=1 SV=1;tr|F5H2W4|F5H2W4_HUMAN Microfibrillar-ass	21.1492	21.1492	23.1492	1	1	1	1	15.2	15.2	15.2	9.4431	0.082667	5.3053	9302500	0	79		15.2	7	H0YGS3;F5H7Z2;F5H2W4;B3KW70;F5GYX4;H0YG03;Q13361	H0YGS3;F5H7Z2;F5H2W4;B3KW70;F5GYX4;H0YG03;Q13361	TRUE	1	1;1;1;1;1;1;1	1;1;1;1;1;1;1	1;1;1;1;1;1;1	1
Histone H3;Histone H3.3C;Histone H3.2;Histone H3.1t;Histone H3.3;Histone H3.1	H3F3B;H3F3A;HIST2H3PS2;H3F3C;HIST2H3A;HIST3H3;HIST1H3A	tr|K7EMV3|K7EMV3_HUMAN Histone H3 OS=Homo sapiens OX=9606 GN=H3F3B PE=1 SV=1;tr|K7EP01|K7EP01_HUMAN Histone H3.3 OS=Homo sapiens OX=9606 GN=H3F3B PE=1 SV=1;tr|B4DEB1|B4DEB1_HUMAN Histone H3 OS=Homo sapiens OX=9606 GN=H3F3A PE=1 SV=1;tr|K7EK07|K7EK07_HUMAN	24.2961	24.2961	26.6179	2	2	2	2	17.4	17.4	17.4	10.334	0	11.292	102990000	5	92		17.4	11	K7EMV3;K7EP01;B4DEB1;K7EK07;Q5TEC6;K7ES00;Q6NXT2;Q71DI3;Q16695;P84243;P68431	K7EMV3;K7EP01;B4DEB1;K7EK07;Q5TEC6;K7ES00;Q6NXT2;Q71DI3;Q16695;P84243;P68431	True;True	2	2;2;2;2;2;2;2;2;2;2;2	2;2;2;2;2;2;2;2;2;2;2	2;2;2;2;2;2;2;2;2;2;2	2
Multidrug resistance-associated protein 9	ABCC12	tr|E9PHY2|E9PHY2_HUMAN Multidrug resistance-associated protein 9 (Fragment) OS=Homo sapiens OX=9606 GN=ABCC12 PE=4 SV=1;tr|B4DYN2|B4DYN2_HUMAN Multidrug resistance-associated protein 9 OS=Homo sapiens OX=9606 GN=ABCC12 PE=2 SV=1;sp|Q96J65|MRP9_HUMAN Multid	27.4323	27.4323	29.7542	1	1	1	1	13.2	13.2	13.2	12.003	0.075472	5.3202	905550000	2	106		13.2	3	E9PHY2;B4DYN2;Q96J65	E9PHY2;B4DYN2;Q96J65	TRUE	1	1;1;1	1;1;1	1;1;1	1
Complement factor B;Complement factor B Ba fragment;Complement factor B Bb fragment	CFB	tr|B4E1Z4|B4E1Z4_HUMAN cDNA FLJ55673, highly similar to Complement factor B OS=Homo sapiens OX=9606 PE=1 SV=1;sp|P00751|CFAB_HUMAN Complement factor B OS=Homo sapiens OX=9606 GN=CFB PE=1 SV=2;tr|E7ETN3|E7ETN3_HUMAN Uncharacterized protein OS=Homo sapiens O	23.2398	23.2398	29.2622	21	21	21	21	19	19	19	140.94	0	255.1	643870000	40	1266		19	7	B4E1Z4;P00751;E7ETN3;H7C5H1;A0A0G2JH38;C9JRT3;H7C526	B4E1Z4;P00751;E7ETN3;H7C5H1;A0A0G2JH38	True;True;True;True;True;True;True;True;True;True;True;True;True;True;True;True;True;True;True;True;True	21	21;21;18;11;11;3;1	21;21;18;11;11;3;1	21;21;18;11;11;3;1	21
60S ribosomal protein L31	RPL31	tr|B8ZZK4|B8ZZK4_HUMAN 60S ribosomal protein L31 OS=Homo sapiens OX=9606 GN=RPL31 PE=1 SV=1;tr|H7C2W9|H7C2W9_HUMAN 60S ribosomal protein L31 (Fragment) OS=Homo sapiens OX=9606 GN=RPL31 PE=1 SV=1;tr|C9JU56|C9JU56_HUMAN 60S ribosomal protein L31 (Fragment) O				1	1	1	1	11.4	11.4	11.4	8.9876	0	6.9018	0	1	79		11.4	6	B8ZZK4;H7C2W9;C9JU56;B7Z4E3;B7Z4C8;P62899	B8ZZK4;H7C2W9;C9JU56;B7Z4E3;B7Z4C8;P62899	TRUE	1	1;1;1;1;1;1	1;1;1;1;1;1	1;1;1;1;1;1	1
Probable ATP-dependent RNA helicase DDX59	DDX59	tr|H0Y6Y1|H0Y6Y1_HUMAN Probable ATP-dependent RNA helicase DDX59 (Fragment) OS=Homo sapiens OX=9606 GN=DDX59 PE=1 SV=1;tr|Q5T1W1|Q5T1W1_HUMAN Probable ATP-dependent RNA helicase DDX59 (Fragment) OS=Homo sapiens OX=9606 GN=DDX59 PE=1 SV=1;tr|B7ZBU3|B7ZBU3_H	22.6682	22.6682	25.9901	1	1	1	1	6.1	6.1	6.1	22.116	0.0038911	6.3677	66649000	1	197		6.1	4	H0Y6Y1;Q5T1W1;B7ZBU3;Q5T1V6	H0Y6Y1;Q5T1W1;B7ZBU3;Q5T1V6	TRUE	1	1;1;1;1	1;1;1;1	1;1;1;1	1
	ITIH4	tr|B7ZKJ8|B7ZKJ8_HUMAN ITIH4 protein OS=Homo sapiens OX=9606 GN=ITIH4 PE=1 SV=1;tr|H7C0L5|H7C0L5_HUMAN Inter-alpha-trypsin inhibitor heavy chain H4 (Fragment) OS=Homo sapiens OX=9606 GN=ITIH4 PE=1 SV=1	23.9453	23.9453	29.4047	1	9	9	1	11.4	11.4	1.7	103.88	0	68.401	710730000	19	935		11.4	2	B7ZKJ8;H7C0L5	B7ZKJ8;H7C0L5	True;True;True;True;True;True;True;True;True	9	9;6	9;6	1;0	9
Prothymosin alpha;Prothymosin alpha, N-terminally processed;Thymosin alpha-1	PTMA	tr|B8ZZQ6|B8ZZQ6_HUMAN Prothymosin alpha OS=Homo sapiens OX=9606 GN=PTMA PE=1 SV=1;sp|P06454|PTMA_HUMAN Prothymosin alpha OS=Homo sapiens OX=9606 GN=PTMA PE=1 SV=2;tr|B8ZZA1|B8ZZA1_HUMAN Prothymosin alpha OS=Homo sapiens OX=9606 GN=PTMA PE=1 SV=1;tr|B8ZZW7	24.2136	24.2136	25.7986	3	3	3	3	26.2	26.2	26.2	11.758	0	20.855	58364000	6	107		26.2	5	B8ZZQ6;P06454;B8ZZA1;B8ZZW7;H7C2N1	B8ZZQ6;P06454;B8ZZA1;B8ZZW7;H7C2N1	True;True;True	3	3;3;2;2;2	3;3;2;2;2	3;3;2;2;2	3
60S ribosomal protein L23	RPL23	tr|C9JD32|C9JD32_HUMAN 60S ribosomal protein L23 (Fragment) OS=Homo sapiens OX=9606 GN=RPL23 PE=1 SV=1;tr|B9ZVP7|B9ZVP7_HUMAN 60S ribosomal protein L23 OS=Homo sapiens OX=9606 GN=RPL23 PE=1 SV=1;tr|J3KT29|J3KT29_HUMAN 60S ribosomal protein L23 OS=Homo sapi	20.9386	20.9386	23.2605	1	1	1	1	22	22	22	9.6694	0	6.8976	10049000	1	91		22	4	C9JD32;B9ZVP7;J3KT29;P62829	C9JD32;B9ZVP7;J3KT29;P62829	TRUE	1	1;1;1;1	1;1;1;1	1;1;1;1	1
	RFTN2	tr|C9J6C2|C9J6C2_HUMAN Raftlin-2 (Fragment) OS=Homo sapiens OX=9606 GN=RFTN2 PE=1 SV=1	21.8862	21.8862	24.6936	1	1	1	1	8.6	8.6	8.6	12.992	0.091811	5.2723	27134000	0	116	116	8.6	1	C9J6C2	C9J6C2	TRUE	1	1	1	1	1
Retinoic acid receptor responder protein 2	RARRES2	tr|C9J8S2|C9J8S2_HUMAN Retinoic acid receptor responder protein 2 (Fragment) OS=Homo sapiens OX=9606 GN=RARRES2 PE=1 SV=1;sp|Q99969|RARR2_HUMAN Retinoic acid receptor responder protein 2 OS=Homo sapiens OX=9606 GN=RARRES2 PE=1 SV=1				1	1	1	1	7.5	7.5	7.5	17.813	0	6.9656	0	1	159		7.5	2	C9J8S2;Q99969	C9J8S2;Q99969	TRUE	1	1;1	1;1	1;1	1
Apolipoprotein D	APOD	tr|C9JF17|C9JF17_HUMAN Apolipoprotein D (Fragment) OS=Homo sapiens OX=9606 GN=APOD PE=1 SV=1;sp|P05090|APOD_HUMAN Apolipoprotein D OS=Homo sapiens OX=9606 GN=APOD PE=1 SV=1;tr|C9JX71|C9JX71_HUMAN Apolipoprotein D (Fragment) OS=Homo sapiens OX=9606 GN=APOD	23.6413	23.6413	27.1007	6	6	6	6	30.2	30.2	30.2	24.158	0	146.58	143920000	13	215		30.2	4	C9JF17;P05090;C9JX71;F8WBT9	C9JF17;P05090;C9JX71	True;True;True;True;True;True	6	6;6;3;1	6;6;3;1	6;6;3;1	6
Nucleobindin-1	NUCB1	tr|C9JKZ2|C9JKZ2_HUMAN Nucleobindin-1 (Fragment) OS=Homo sapiens OX=9606 GN=NUCB1 PE=1 SV=8;tr|H7BZI1|H7BZI1_HUMAN Nucleobindin-1 (Fragment) OS=Homo sapiens OX=9606 GN=NUCB1 PE=1 SV=1;sp|Q02818|NUCB1_HUMAN Nucleobindin-1 OS=Homo sapiens OX=9606 GN=NUCB1 PE	21.9969	21.9969	25.9969	1	1	1	1	4.5	4.5	4.5	31.066	0.032573	5.5823	66964000	3	267		4.5	3	C9JKZ2;H7BZI1;Q02818	C9JKZ2;H7BZI1;Q02818	TRUE	1	1;1;1	1;1;1	1;1;1	1
Interleukin-36 receptor antagonist protein	IL36RN	tr|C9JTH1|C9JTH1_HUMAN Interleukin-1 (Fragment) OS=Homo sapiens OX=9606 GN=IL36RN PE=1 SV=1;sp|Q9UBH0|I36RA_HUMAN Interleukin-36 receptor antagonist protein OS=Homo sapiens OX=9606 GN=IL36RN PE=1 SV=1	21.8861	21.8861	23.886	1	1	1	1	13.7	13.7	13.7	12.623	0.071625	5.3473	15503000	1	117		13.7	2	C9JTH1;Q9UBH0	C9JTH1;Q9UBH0	TRUE	1	1;1	1;1	1;1	1
Alpha-2-HS-glycoprotein;Alpha-2-HS-glycoprotein chain A;Alpha-2-HS-glycoprotein chain B	AHSG	tr|C9JV77|C9JV77_HUMAN Alpha-2-HS-glycoprotein OS=Homo sapiens OX=9606 GN=AHSG PE=1 SV=1;sp|P02765|FETUA_HUMAN Alpha-2-HS-glycoprotein OS=Homo sapiens OX=9606 GN=AHSG PE=1 SV=2	18.8383	18.8383	22.5388	1	1	1	1	3.8	3.8	3.8	39.411	0.0074627	5.9317	6093100	1	368		3.8	2	C9JV77;P02765	C9JV77;P02765	TRUE	1	1;1	1;1	1;1	1
	SSUH2	tr|F8WED9|F8WED9_HUMAN Protein SSUH2 homolog OS=Homo sapiens OX=9606 GN=SSUH2 PE=4 SV=1;tr|C9JZA7|C9JZA7_HUMAN Protein SSUH2 homolog (Fragment) OS=Homo sapiens OX=9606 GN=SSUH2 PE=4 SV=1	20.1407	20.1407	22.7257	1	1	1	1	11.5	11.5	11.5	17.449	0.090465	5.2698	6935900	0	156		11.5	2	F8WED9;C9JZA7	F8WED9;C9JZA7	TRUE	1	1;1	1;1	1;1	1
Regulating synaptic membrane exocytosis protein 2	RIMS2	tr|E5RI36|E5RI36_HUMAN Regulating synaptic membrane exocytosis protein 2 (Fragment) OS=Homo sapiens OX=9606 GN=RIMS2 PE=1 SV=1;tr|F8W6W8|F8W6W8_HUMAN Regulating synaptic membrane exocytosis protein 2 (Fragment) OS=Homo sapiens OX=9606 GN=RIMS2 PE=1 SV=1;tr				1	1	1	1	7.4	7.4	7.4	28.138	0.043887	5.5166	0	1	258		7.4	4	E5RI36;F8W6W8;D6RA03;Q9UQ26	E5RI36;F8W6W8;D6RA03;Q9UQ26	TRUE	1	1;1;1;1	1;1;1;1	1;1;1;1	1
	TBC1D19	tr|D6RA74|D6RA74_HUMAN TBC1 domain family member 19 (Fragment) OS=Homo sapiens OX=9606 GN=TBC1D19 PE=1 SV=1				1	1	1	1	3.1	3.1	3.1	25.438	0.054598	5.402	0	1	223	223	3.1	1	D6RA74	D6RA74	TRUE	1	1	1	1	1
Vitamin D-binding protein	GC	tr|D6RF35|D6RF35_HUMAN Vitamin D-binding protein OS=Homo sapiens OX=9606 GN=GC PE=1 SV=1;sp|P02774|VTDB_HUMAN Vitamin D-binding protein OS=Homo sapiens OX=9606 GN=GC PE=1 SV=2;tr|D6RBJ7|D6RBJ7_HUMAN Vitamin D-binding protein OS=Homo sapiens OX=9606 GN=GC P	23.6908	23.6908	28.5489	23	23	23	23	53.4	53.4	53.4	53.02	0	240.48	392700000	36	476		53.4	6	D6RF35;P02774;D6RBJ7;CON__Q3MHN5;CON__ENSEMBL:ENSBTAP00000018229;D6RF20	D6RF35;P02774;D6RBJ7	True;True;True;True;True;True;True;True;True;True;True;True;True;True;True;True;True;True;True;True;True;True;True	23	23;23;16;6;6;4	23;23;16;6;6;4	23;23;16;6;6;4	23
	ETNPPL	tr|D6RGG2|D6RGG2_HUMAN Ethanolamine-phosphate phospho-lyase (Fragment) OS=Homo sapiens OX=9606 GN=ETNPPL PE=1 SV=1				1	1	1	1	33.3	33.3	33.3	6.8677	0.061625	5.3656	0	1	60	60	33.3	1	D6RGG2	D6RGG2	TRUE	1	1	1	1	1
Pulmonary surfactant-associated protein B	SFTPB	tr|H0Y7V6|H0Y7V6_HUMAN Pulmonary surfactant-associated protein B (Fragment) OS=Homo sapiens OX=9606 GN=SFTPB PE=1 SV=1;tr|D6W5L6|D6W5L6_HUMAN Pulmonary surfactant-associated protein B OS=Homo sapiens OX=9606 GN=SFTPB PE=1 SV=1;sp|P07988|PSPB_HUMAN Pulmonar	20.9768	20.9768	24.5617	2	2	2	2	6.4	6.4	6.4	41.356	0	24.5	24764000	3	374		6.4	3	H0Y7V6;D6W5L6;P07988	H0Y7V6;D6W5L6;P07988	True;True	2	2;2;2	2;2;2	2;2;2	2
CUB and sushi domain-containing protein 1	CSMD1	tr|H7BXU2|H7BXU2_HUMAN CUB and sushi domain-containing protein 1 (Fragment) OS=Homo sapiens OX=9606 GN=CSMD1 PE=1 SV=1;tr|F8W9C3|F8W9C3_HUMAN CUB and sushi domain-containing protein 1 OS=Homo sapiens OX=9606 GN=CSMD1 PE=1 SV=1;tr|F5GZ18|F5GZ18_HUMAN CUB an				1	1	1	1	0.3	0.3	0.3	323.46	0.017182	5.701	0	2	2967		0.3	5	H7BXU2;F8W9C3;F5GZ18;E5RIG2;Q96PZ7	H7BXU2;F8W9C3;F5GZ18;E5RIG2;Q96PZ7	TRUE	1	1;1;1;1;1	1;1;1;1;1	1;1;1;1;1	1
	CALM2;CALM3;CALM1	tr|F8WBR5|F8WBR5_HUMAN Calmodulin-2 OS=Homo sapiens OX=9606 GN=CALM2 PE=1 SV=1;tr|M0QZ52|M0QZ52_HUMAN Calmodulin 3 (Phosphorylase kinase, delta), isoform CRA_d OS=Homo sapiens OX=9606 GN=CALM1 PE=1 SV=1;tr|G3V479|G3V479_HUMAN Calmodulin-1 OS=Homo sapiens O	20.9029	20.9029	23.2248	1	1	1	1	26.2	26.2	26.2	7.372	0.054381	5.4605	9803100	1	65		26.2	9	F8WBR5;M0QZ52;G3V479;P0DP25;P0DP24;P0DP23;E7ETZ0;H0Y7A7;E7EMB3	F8WBR5;M0QZ52;G3V479;P0DP25;P0DP24;P0DP23;E7ETZ0;H0Y7A7;E7EMB3	TRUE	1	1;1;1;1;1;1;1;1;1	1;1;1;1;1;1;1;1;1	1;1;1;1;1;1;1;1;1	1
Elastin	ELN	tr|E7ETP7|E7ETP7_HUMAN Elastin (Fragment) OS=Homo sapiens OX=9606 GN=ELN PE=1 SV=1;tr|G3V0G6|G3V0G6_HUMAN Elastin OS=Homo sapiens OX=9606 GN=ELN PE=1 SV=1;tr|E7ENM0|E7ENM0_HUMAN Elastin OS=Homo sapiens OX=9606 GN=ELN PE=1 SV=1;tr|E7EN65|E7EN65_HUMAN Elasti	22.7547	22.7547	25.3396	3	3	3	3	17.7	17.7	17.7	26.176	0	22.859	42461000	4	294		17.7	11	E7ETP7;G3V0G6;E7ENM0;E7EN65;F8WAH6;P15502;B3KRT8;G5E950;E7EWS8;E7EP82;E7ENW7	E7ETP7;G3V0G6;E7ENM0;E7EN65;F8WAH6;P15502;B3KRT8;G5E950	True;True;True	3	3;3;3;3;3;3;2;2;1;1;1	3;3;3;3;3;3;2;2;1;1;1	3;3;3;3;3;3;2;2;1;1;1	3
60S ribosomal protein L14	RPL14	tr|E7EPB3|E7EPB3_HUMAN 60S ribosomal protein L14 OS=Homo sapiens OX=9606 GN=RPL14 PE=1 SV=1;sp|P50914|RL14_HUMAN 60S ribosomal protein L14 OS=Homo sapiens OX=9606 GN=RPL14 PE=1 SV=4	19.9406	19.9406	22.5257	1	1	1	1	8.9	8.9	8.9	14.558	0.014388	5.8273	6038100	1	124		8.9	2	E7EPB3;P50914	E7EPB3;P50914	TRUE	1	1;1	1;1	1;1	1
Tripartite motif-containing protein 5	TRIM5	tr|E7EQQ5|E7EQQ5_HUMAN Tripartite motif-containing protein 5 (Fragment) OS=Homo sapiens OX=9606 GN=TRIM5 PE=1 SV=1;sp|Q9C035|TRIM5_HUMAN Tripartite motif-containing protein 5 OS=Homo sapiens OX=9606 GN=TRIM5 PE=1 SV=1				1	1	1	1	3.8	3.8	3.8	24.204	0.043614	5.5126	0	2	209		3.8	2	E7EQQ5;Q9C035	E7EQQ5;Q9C035	TRUE	1	1;1	1;1	1;1	1
Glyceraldehyde-3-phosphate dehydrogenase	GAPDH	tr|E7EUT5|E7EUT5_HUMAN Glyceraldehyde-3-phosphate dehydrogenase OS=Homo sapiens OX=9606 GN=GAPDH PE=1 SV=1;sp|P04406|G3P_HUMAN Glyceraldehyde-3-phosphate dehydrogenase OS=Homo sapiens OX=9606 GN=GAPDH PE=1 SV=3				1	1	1	1	5.8	5.8	5.8	27.87	0.0038168	6.2708	0	1	260		5.8	2	E7EUT5;P04406	E7EUT5;P04406	TRUE	1	1;1	1;1	1;1	1
UPF0577 protein KIAA1324	KIAA1324	tr|E9PB18|E9PB18_HUMAN UPF0577 protein KIAA1324 (Fragment) OS=Homo sapiens OX=9606 GN=KIAA1324 PE=1 SV=1;sp|Q6UXG2|K1324_HUMAN UPF0577 protein KIAA1324 OS=Homo sapiens OX=9606 GN=KIAA1324 PE=2 SV=2	19.0217	19.0217	24.3437	1	1	1	1	3.8	3.8	3.8	99.365	0.073171	5.3252	21290000	1	901		3.8	2	E9PB18;Q6UXG2	E9PB18;Q6UXG2	TRUE	1	1;1	1;1	1;1	1
THO complex subunit 4	ALYREF	tr|E9PB61|E9PB61_HUMAN THO complex subunit 4 OS=Homo sapiens OX=9606 GN=ALYREF PE=1 SV=1;sp|Q86V81|THOC4_HUMAN THO complex subunit 4 OS=Homo sapiens OX=9606 GN=ALYREF PE=1 SV=3	22.0844	22.0844	25.9913	3	3	3	3	20.8	20.8	20.8	27.557	0	29.467	66705000	7	264		20.8	2	E9PB61;Q86V81	E9PB61;Q86V81	True;True;True	3	3;3	3;3	3;3	3
Poly [ADP-ribose] polymerase 8	PARP8	tr|F5H3X8|F5H3X8_HUMAN Poly [ADP-ribose] polymerase OS=Homo sapiens OX=9606 GN=PARP8 PE=1 SV=1;tr|E9PFI7|E9PFI7_HUMAN Poly [ADP-ribose] polymerase OS=Homo sapiens OX=9606 GN=PARP8 PE=1 SV=1;sp|Q8N3A8|PARP8_HUMAN Protein mono-ADP-ribosyltransferase PARP8 OS	21.2988	21.2988	26.2529	1	1	1	1	2.6	2.6	2.6	55.147	0.092545	5.2857	79969000	1	494		2.6	3	F5H3X8;E9PFI7;Q8N3A8	F5H3X8;E9PFI7;Q8N3A8	TRUE	1	1;1;1	1;1;1	1;1;1	1
Prothrombin;Activation peptide fragment 1;Activation peptide fragment 2;Thrombin light chain;Thrombin heavy chain	F2	sp|P00734|THRB_HUMAN Prothrombin OS=Homo sapiens OX=9606 GN=F2 PE=1 SV=2;tr|E9PIT3|E9PIT3_HUMAN Prothrombin OS=Homo sapiens OX=9606 GN=F2 PE=1 SV=1;tr|C9JV37|C9JV37_HUMAN Prothrombin (Fragment) OS=Homo sapiens OX=9606 GN=F2 PE=1 SV=1	20.5153	20.5153	25.4695	7	7	7	7	17.4	17.4	17.4	70.036	0	51.443	46460000	7	622		17.4	3	P00734;E9PIT3;C9JV37	P00734;E9PIT3;C9JV37	True;True;True;True;True;True;True	7	7;7;5	7;7;5	7;7;5	7
60S ribosomal protein L27a	RPL27A	tr|E9PJD9|E9PJD9_HUMAN 60S ribosomal protein L27a OS=Homo sapiens OX=9606 GN=RPL27A PE=1 SV=1;tr|E9PLL6|E9PLL6_HUMAN 60S ribosomal protein L27a OS=Homo sapiens OX=9606 GN=RPL27A PE=1 SV=1;tr|E9PLX7|E9PLX7_HUMAN 60S ribosomal protein L27a OS=Homo sapiens OX	23.0405	23.0405	25.0405	1	1	1	1	12.1	12.1	12.1	10.127	0.058989	5.3763	34511000	0	91		12.1	4	E9PJD9;E9PLL6;E9PLX7;P46776	E9PJD9;E9PLL6;E9PLX7;P46776	TRUE	1	1;1;1;1	1;1;1;1	1;1;1;1	1
60S ribosomal protein L8	RPL8	tr|E9PP36|E9PP36_HUMAN 60S ribosomal protein L8 OS=Homo sapiens OX=9606 GN=RPL8 PE=1 SV=1;tr|E9PKZ0|E9PKZ0_HUMAN 60S ribosomal protein L8 (Fragment) OS=Homo sapiens OX=9606 GN=RPL8 PE=1 SV=1;tr|E9PKU4|E9PKU4_HUMAN 60S ribosomal protein L8 (Fragment) OS=Hom	20.0092	20.0092	22.8165	1	1	1	1	7.4	7.4	7.4	16.18	0.03268	5.5971	7386800	2	148		7.4	4	E9PP36;E9PKZ0;E9PKU4;P62917	E9PP36;E9PKZ0;E9PKU4;P62917	TRUE	1	1;1;1;1	1;1;1;1	1;1;1;1	1
Midkine	MDK	tr|E9PPJ5|E9PPJ5_HUMAN Midkine (Fragment) OS=Homo sapiens OX=9606 GN=MDK PE=1 SV=1;tr|E9PLM6|E9PLM6_HUMAN Midkine OS=Homo sapiens OX=9606 GN=MDK PE=1 SV=1;sp|P21741|MK_HUMAN Midkine OS=Homo sapiens OX=9606 GN=MDK PE=1 SV=1	20.7854	20.7854	23.7854	1	1	1	1	7.6	7.6	7.6	14.374	0	20.986	14458000	2	131		7.6	3	E9PPJ5;E9PLM6;P21741	E9PPJ5;E9PLM6;P21741	TRUE	1	1;1;1	1;1;1	1;1;1	1
Galactosylgalactosylxylosylprotein 3-beta-glucuronosyltransferase 3	B3GAT3	tr|E9PNA1|E9PNA1_HUMAN Galactosylgalactosylxylosylprotein 3-beta-glucuronosyltransferase (Fragment) OS=Homo sapiens OX=9606 GN=B3GAT3 PE=1 SV=1;tr|G3V150|G3V150_HUMAN Galactosylgalactosylxylosylprotein 3-beta-glucuronosyltransferase OS=Homo sapiens OX=9606	22.741	22.741	26.0629	1	1	1	1	3.1	3.1	3.1	24.482	0.017241	5.7083	70100000	2	223		3.1	4	E9PNA1;G3V150;REV__Q9BRK4;O94766	E9PNA1;G3V150;REV__Q9BRK4;O94766	TRUE	1	1;1;1;1	1;1;1;1	1;1;1;1	1
Collagen alpha-2(VIII) chain	COL8A2	tr|E9PP49|E9PP49_HUMAN Collagen alpha-2(VIII) chain OS=Homo sapiens OX=9606 GN=COL8A2 PE=1 SV=1;sp|P25067|CO8A2_HUMAN Collagen alpha-2(VIII) chain OS=Homo sapiens OX=9606 GN=COL8A2 PE=1 SV=2	17.3422	17.3422	21.5121	1	1	1	1	7.7	7.7	7.7	60.707	0.054913	5.411	2990800	0	638		7.7	2	E9PP49;P25067	E9PP49;P25067	TRUE	1	1;1	1;1	1;1	1
Cofilin-1	CFL1	tr|E9PS23|E9PS23_HUMAN Cofilin-1 (Fragment) OS=Homo sapiens OX=9606 GN=CFL1 PE=1 SV=8;tr|E9PP50|E9PP50_HUMAN Cofilin-1 (Fragment) OS=Homo sapiens OX=9606 GN=CFL1 PE=1 SV=8;sp|P23528|COF1_HUMAN Cofilin-1 OS=Homo sapiens OX=9606 GN=CFL1 PE=1 SV=3				1	1	1	1	13.3	13.3	13.3	10.08	0.011152	5.9234	0	1	90		13.3	3	E9PS23;E9PP50;P23528	E9PS23;E9PP50;P23528	TRUE	1	1;1;1	1;1;1	1;1;1	1
	AP2A2	tr|E9PPZ3|E9PPZ3_HUMAN AP-2 complex subunit alpha-2 (Fragment) OS=Homo sapiens OX=9606 GN=AP2A2 PE=4 SV=1;tr|E9PS94|E9PS94_HUMAN AP-2 complex subunit alpha-2 (Fragment) OS=Homo sapiens OX=9606 GN=AP2A2 PE=4 SV=1;tr|E9PQP4|E9PQP4_HUMAN AP-2 complex subunit	22.1574	22.1574	24.1574	1	1	1	1	25	25	25	6.6957	0.05698	5.3953	18711000	1	60		25	3	E9PPZ3;E9PS94;E9PQP4	E9PPZ3;E9PS94;E9PQP4	TRUE	1	1;1;1	1;1;1	1;1;1	1
	TLX2	tr|F1T0F2|F1T0F2_HUMAN T-cell leukemia homeobox protein 2 OS=Homo sapiens OX=9606 GN=TLX2 PE=2 SV=1	21.551	21.551	24.7209	1	1	1	1	13.6	13.6	13.6	23.587	0.090909	5.2704	27653000	2	235	235	13.6	1	F1T0F2	F1T0F2	TRUE	1	1	1	1	1
Centrosome and spindle pole-associated protein 1	CSPP1	tr|F2Z2M5|F2Z2M5_HUMAN Centrosome and spindle pole-associated protein 1 OS=Homo sapiens OX=9606 GN=CSPP1 PE=1 SV=1;sp|Q1MSJ5|CSPP1_HUMAN Centrosome and spindle pole-associated protein 1 OS=Homo sapiens OX=9606 GN=CSPP1 PE=1 SV=4	20.0931	20.0931	24.341	1	1	1	1	3.7	3.7	3.7	47.52	0.052308	5.4926	21251000	1	404		3.7	2	F2Z2M5;Q1MSJ5	F2Z2M5;Q1MSJ5	TRUE	1	1;1	1;1	1;1	1
DNA ligase;DNA ligase 1	LIG1	tr|M0R0Q7|M0R0Q7_HUMAN DNA ligase OS=Homo sapiens OX=9606 GN=LIG1 PE=1 SV=1;tr|F5GZ28|F5GZ28_HUMAN DNA ligase OS=Homo sapiens OX=9606 GN=LIG1 PE=1 SV=1;sp|P18858|DNLI1_HUMAN DNA ligase 1 OS=Homo sapiens OX=9606 GN=LIG1 PE=1 SV=1	19.0193	19.0193	24.3768	1	1	1	1	1.4	1.4	1.4	88.386	0.084656	5.302	21785000	1	800		1.4	3	M0R0Q7;F5GZ28;P18858	M0R0Q7;F5GZ28;P18858	TRUE	1	1;1;1	1;1;1	1;1;1	1
	HDAC4	tr|F5H0B1|F5H0B1_HUMAN Histone deacetylase 4 (Fragment) OS=Homo sapiens OX=9606 GN=HDAC4 PE=1 SV=1	24.9536	24.9536	25.9536	1	1	1	1	96.6	96.6	96.6	3.1705	0	7.6775	64985000	1	29	29	96.6	1	F5H0B1	F5H0B1	TRUE	1	1	1	1	1
60S ribosomal protein L6	RPL6	tr|F8VR69|F8VR69_HUMAN 60S ribosomal protein L6 (Fragment) OS=Homo sapiens OX=9606 GN=RPL6 PE=1 SV=8;tr|F8VZ45|F8VZ45_HUMAN 60S ribosomal protein L6 (Fragment) OS=Homo sapiens OX=9606 GN=RPL6 PE=1 SV=1;tr|U3KQR5|U3KQR5_HUMAN 60S ribosomal protein L6 (Fragm				1	1	1	1	14.3	14.3	14.3	7.1906	0.032258	5.569	0	1	63		14.3	4	F8VR69;F8VZ45;U3KQR5;Q02878	F8VR69;F8VZ45;U3KQR5;Q02878	TRUE	1	1;1;1;1	1;1;1;1	1;1;1;1	1
60S ribosomal protein L18	RPL18	tr|F8VUA6|F8VUA6_HUMAN 60S ribosomal protein L18 (Fragment) OS=Homo sapiens OX=9606 GN=RPL18 PE=1 SV=1;tr|G3V203|G3V203_HUMAN 60S ribosomal protein L18 OS=Homo sapiens OX=9606 GN=RPL18 PE=1 SV=1;tr|H0YHA7|H0YHA7_HUMAN 60S ribosomal protein L18 (Fragment) O	17.9419	17.9419	20.2639	1	1	1	1	10	10	10	14.529	0.092308	5.2852	1259000	1	130		10	5	F8VUA6;G3V203;H0YHA7;J3QQ67;Q07020	F8VUA6;G3V203;H0YHA7;J3QQ67;Q07020	TRUE	1	1;1;1;1;1	1;1;1;1;1	1;1;1;1;1	1
Ankyrin repeat and sterile alpha motif domain-containing protein 1B	ANKS1B	tr|J3QSU0|J3QSU0_HUMAN Ankyrin repeat and sterile alpha motif domain-containing protein 1B OS=Homo sapiens OX=9606 GN=ANKS1B PE=1 SV=2;tr|F8VVQ4|F8VVQ4_HUMAN Ankyrin repeat and sterile alpha motif domain-containing protein 1B (Fragment) OS=Homo sapiens OX=	22.6519	22.6519	26.7393	1	1	1	1	3.3	3.3	3.3	36.523	0.014706	5.9021	112030000	5	332		3.3	3	J3QSU0;F8VVQ4;Q7Z6G8	J3QSU0;F8VVQ4;Q7Z6G8	TRUE	1	1;1;1	1;1;1	1;1;1	1
Matrix metalloproteinase-14	MMP14	tr|F8W1B7|F8W1B7_HUMAN Matrix metalloproteinase-14 (Fragment) OS=Homo sapiens OX=9606 GN=MMP14 PE=1 SV=1;sp|P50281|MMP14_HUMAN Matrix metalloproteinase-14 OS=Homo sapiens OX=9606 GN=MMP14 PE=1 SV=3	18.3711	18.3711	22.1784	1	1	1	1	6.2	6.2	6.2	22.326	0.071429	5.3463	4746500	1	194		6.2	2	F8W1B7;P50281	F8W1B7;P50281	TRUE	1	1;1	1;1	1;1	1
Heterogeneous nuclear ribonucleoprotein A1;Heterogeneous nuclear ribonucleoprotein A1, N-terminally processed	HNRNPA1	tr|H0YH80|H0YH80_HUMAN Heterogeneous nuclear ribonucleoprotein A1 (Fragment) OS=Homo sapiens OX=9606 GN=HNRNPA1 PE=1 SV=1;tr|F8W6I7|F8W6I7_HUMAN Heterogeneous nuclear ribonucleoprotein A1 OS=Homo sapiens OX=9606 GN=HNRNPA1 PE=1 SV=2;sp|P09651|ROA1_HUMAN He	19.3521	19.3521	22.8116	1	1	1	1	8.4	8.4	8.4	19.471	0.071038	5.3412	7361500	1	191		8.4	3	H0YH80;F8W6I7;P09651	H0YH80;F8W6I7;P09651	TRUE	1	1;1;1	1;1;1	1;1;1	1
Mannan-binding lectin serine protease 1;Mannan-binding lectin serine protease 1 heavy chain;Mannan-binding lectin serine protease 1 light chain	MASP1	sp|P48740|MASP1_HUMAN Mannan-binding lectin serine protease 1 OS=Homo sapiens OX=9606 GN=MASP1 PE=1 SV=3;tr|F8W876|F8W876_HUMAN Mannan-binding lectin serine protease 1 OS=Homo sapiens OX=9606 GN=MASP1 PE=1 SV=1;tr|C9JMA2|C9JMA2_HUMAN Mannan-binding lectin	19.0487	19.0487	23.9556	2	2	2	2	3.7	3.7	3.7	79.246	0	11.084	16269000	2	699		3.7	3	P48740;F8W876;C9JMA2	P48740;F8W876;C9JMA2	True;True	2	2;2;1	2;2;1	2;2;1	2
Heat shock protein beta-1	HSPB1	tr|F8WE04|F8WE04_HUMAN Heat shock protein beta-1 OS=Homo sapiens OX=9606 GN=HSPB1 PE=1 SV=1;sp|P04792|HSPB1_HUMAN Heat shock protein beta-1 OS=Homo sapiens OX=9606 GN=HSPB1 PE=1 SV=2	20.1877	20.1877	23.6472	1	1	1	1	5.4	5.4	5.4	20.406	0	7.9703	13138000	2	186		5.4	2	F8WE04;P04792	F8WE04;P04792	TRUE	1	1;1	1;1	1;1	1
	HBA2	tr|G3V1N2|G3V1N2_HUMAN HCG1745306, isoform CRA_a OS=Homo sapiens OX=9606 GN=HBA2 PE=1 SV=1	22.1352	22.1352	24.7202	1	4	1	1	49.1	21.8	21.8	11.948	0	9.2919	27638000	2	110	110	49.1	1	G3V1N2	G3V1N2	True;False;False;False	1	4	1	1	4
MAGUK p55 subfamily member 5	MPP5	tr|G3V2B0|G3V2B0_HUMAN MAGUK p55 subfamily member 5 OS=Homo sapiens OX=9606 GN=MPP5 PE=1 SV=1;sp|Q8N3R9|MPP5_HUMAN MAGUK p55 subfamily member 5 OS=Homo sapiens OX=9606 GN=MPP5 PE=1 SV=3	19.5583	19.5583	22.3656	1	1	1	1	16.1	16.1	16.1	14.279	0.031949	5.5672	5404200	1	124		16.1	2	G3V2B0;Q8N3R9	G3V2B0;Q8N3R9	TRUE	1	1;1	1;1	1;1	1
	TTC6	tr|G3V3A5|G3V3A5_HUMAN Tetratricopeptide repeat protein 6 OS=Homo sapiens OX=9606 GN=TTC6 PE=1 SV=1				1	1	1	1	0.4	0.4	0.4	216.44	0.059659	5.3845	0	1	1886	1886	0.4	1	G3V3A5	G3V3A5	TRUE	1	1	1	1	1
Fibulin-5	FBLN5	tr|G3V4U0|G3V4U0_HUMAN Fibulin-5 OS=Homo sapiens OX=9606 GN=FBLN5 PE=1 SV=1;sp|Q9UBX5|FBLN5_HUMAN Fibulin-5 OS=Homo sapiens OX=9606 GN=FBLN5 PE=1 SV=1;tr|G3V3Y2|G3V3Y2_HUMAN Fibulin-5 (Fragment) OS=Homo sapiens OX=9606 GN=FBLN5 PE=1 SV=1;tr|G3XA98|G3XA98_H	19.4571	19.4571	23.4571	2	2	2	2	5.5	5.5	5.5	50.881	0	14.097	11516000	2	453		5.5	4	G3V4U0;Q9UBX5;G3V3Y2;G3XA98	G3V4U0;Q9UBX5;G3V3Y2;G3XA98	True;True	2	2;2;1;1	2;2;1;1	2;2;1;1	2
Serpin B4;Serpin B3	SERPINB4;SERPINB3	tr|H0Y5H9|H0Y5H9_HUMAN Serpin B4 (Fragment) OS=Homo sapiens OX=9606 GN=SERPINB4 PE=1 SV=1;sp|P48594|SPB4_HUMAN Serpin B4 OS=Homo sapiens OX=9606 GN=SERPINB4 PE=1 SV=2;sp|P29508|SPB3_HUMAN Serpin B3 OS=Homo sapiens OX=9606 GN=SERPINB3 PE=1 SV=2				1	1	1	1	2.4	2.4	2.4	42.388	0.014493	5.8367	0	1	371		2.4	3	H0Y5H9;P48594;P29508	H0Y5H9;P48594;P29508	TRUE	1	1;1;1	1;1;1	1;1;1	1
RNA-binding motif protein, X chromosome;RNA-binding motif protein, X chromosome, N-terminally processed;RNA binding motif protein, X-linked-like-1	RBMX;RBMXL1	tr|H0Y6E7|H0Y6E7_HUMAN RNA-binding motif protein, X chromosome (Fragment) OS=Homo sapiens OX=9606 GN=RBMX PE=1 SV=2;tr|H3BT71|H3BT71_HUMAN RNA-binding motif protein, X chromosome OS=Homo sapiens OX=9606 GN=RBMX PE=1 SV=1;sp|P38159|RBMX_HUMAN RNA-binding mo	19.148	19.148	23.318	2	2	2	2	8.9	8.9	8.9	31.745	0	11.691	10457000	2	292		8.9	7	H0Y6E7;H3BT71;P38159;H3BNC1;H3BR27;A0A1B0GUK8;Q96E39	H0Y6E7;H3BT71;P38159;H3BNC1;H3BR27;A0A1B0GUK8;Q96E39	True;True	2	2;2;2;1;1;1;1	2;2;2;1;1;1;1	2;2;2;1;1;1;1	2
Trinucleotide repeat-containing gene 6B protein	TNRC6B	tr|H0Y720|H0Y720_HUMAN Trinucleotide repeat-containing gene 6B protein (Fragment) OS=Homo sapiens OX=9606 GN=TNRC6B PE=1 SV=1;sp|Q9UPQ9|TNR6B_HUMAN Trinucleotide repeat-containing gene 6B protein OS=Homo sapiens OX=9606 GN=TNRC6B PE=1 SV=4	14.6029	14.6029	20.5571	1	1	1	1	1.2	1.2	1.2	148.57	0.083333	5.3101	1542800	0	1391		1.2	2	H0Y720;Q9UPQ9	H0Y720;Q9UPQ9	TRUE	1	1;1	1;1	1;1	1
Low affinity immunoglobulin gamma Fc region receptor III-A	FCGR3A	tr|H0Y755|H0Y755_HUMAN Low affinity immunoglobulin gamma Fc region receptor III-A (Fragment) OS=Homo sapiens OX=9606 GN=FCGR3A PE=1 SV=2;tr|M9MML0|M9MML0_HUMAN Low affinity immunoglobulin gamma Fc region receptor III-A OS=Homo sapiens OX=9606 GN=FCGR3A PE=	25.9359	25.9359	28.9359	4	7	7	4	20.2	20.2	11.1	34.722	0	64.71	513540000	21	307		20.2	4	H0Y755;M9MML0;P08637;C9JC71	H0Y755;M9MML0;P08637	True;True;True;True;True;True;True	7	7;7;7;2	7;7;7;2	4;4;4;2	7
Probable ATP-dependent RNA helicase DDX60	DDX60	tr|H0Y9B2|H0Y9B2_HUMAN Probable ATP-dependent RNA helicase DDX60 (Fragment) OS=Homo sapiens OX=9606 GN=DDX60 PE=1 SV=1;sp|Q8IY21|DDX60_HUMAN Probable ATP-dependent RNA helicase DDX60 OS=Homo sapiens OX=9606 GN=DDX60 PE=1 SV=3	21.9912	21.9912	23.9912	1	1	1	1	18.3	18.3	18.3	12.135	0.013986	5.7652	16675000	2	104		18.3	2	H0Y9B2;Q8IY21	H0Y9B2;Q8IY21	TRUE	1	1;1	1;1	1;1	1
	AHRR	tr|H0YA43|H0YA43_HUMAN Aryl hydrocarbon receptor repressor (Fragment) OS=Homo sapiens OX=9606 GN=AHRR PE=1 SV=1				1	1	1	1	5.6	5.6	5.6	23.312	0.088542	5.2946	0	1	215	215	5.6	1	H0YA43	H0YA43	TRUE	1	1	1	1	1
Transient receptor potential cation channel subfamily M member 7	TRPM7	tr|H0YLN8|H0YLN8_HUMAN Transient receptor potential cation channel subfamily M member 7 OS=Homo sapiens OX=9606 GN=TRPM7 PE=1 SV=1;sp|Q96QT4|TRPM7_HUMAN Transient receptor potential cation channel subfamily M member 7 OS=Homo sapiens OX=9606 GN=TRPM7 PE=1	11.9543	11.9543	18.4621	1	1	1	1	1	1	1	212.62	0.089157	5.2658	361120	0	1864		1	2	H0YLN8;Q96QT4	H0YLN8;Q96QT4	TRUE	1	1;1	1;1	1;1	1
RNA-binding protein FUS	FUS	tr|H3BPE7|H3BPE7_HUMAN RNA-binding protein FUS OS=Homo sapiens OX=9606 GN=FUS PE=1 SV=1;sp|P35637|FUS_HUMAN RNA-binding protein FUS OS=Homo sapiens OX=9606 GN=FUS PE=1 SV=1	21.5558	21.5558	25.2562	3	3	3	3	7.6	7.6	7.6	53.496	0	18.999	40075000	3	527		7.6	4	H3BPE7;P35637;A0A075B7D9;Q92804	H3BPE7;P35637	True;True;True	3	3;3;1;1	3;3;1;1	3;3;1;1	3
Sorting nexin-33	SNX33	tr|H3BPR3|H3BPR3_HUMAN Sorting nexin-33 (Fragment) OS=Homo sapiens OX=9606 GN=SNX33 PE=1 SV=1;sp|Q8WV41|SNX33_HUMAN Sorting nexin-33 OS=Homo sapiens OX=9606 GN=SNX33 PE=1 SV=1	21.8136	21.8136	25.5141	1	1	1	1	4.2	4.2	4.2	33.472	0.014599	5.853	47918000	1	283		4.2	2	H3BPR3;Q8WV41	H3BPR3;Q8WV41	TRUE	1	1;1	1;1	1;1	1
Tetraspanin;Tetraspanin-14	TSPAN14	tr|H7BXY6|H7BXY6_HUMAN Tetraspanin OS=Homo sapiens OX=9606 GN=TSPAN14 PE=1 SV=1;sp|Q8NG11|TSN14_HUMAN Tetraspanin-14 OS=Homo sapiens OX=9606 GN=TSPAN14 PE=1 SV=1	22.7156	22.7156	25.8856	1	1	1	1	3.8	3.8	3.8	23.918	0.017123	5.6988	61991000	0	213		3.8	2	H7BXY6;Q8NG11	H7BXY6;Q8NG11	TRUE	1	1;1	1;1	1;1	1
Proline-rich acidic protein 1	PRAP1	tr|H7BY64|H7BY64_HUMAN ZNF511-PRAP1 readthrough (Fragment) OS=Homo sapiens OX=9606 GN=ZNF511-PRAP1 PE=4 SV=2;sp|Q96NZ9|PRAP1_HUMAN Proline-rich acidic protein 1 OS=Homo sapiens OX=9606 GN=PRAP1 PE=1 SV=2	19.2688	19.2688	22.8538	1	1	1	1	2.8	2.8	2.8	36.012	0.063712	5.3536	7580100	0	318		2.8	2	H7BY64;Q96NZ9	H7BY64;Q96NZ9	TRUE	1	1;1	1;1	1;1	1
40S ribosomal protein S13	RPS13	sp|P62277|RS13_HUMAN 40S ribosomal protein S13 OS=Homo sapiens OX=9606 GN=RPS13 PE=1 SV=2;tr|J3KMX5|J3KMX5_HUMAN 40S ribosomal protein S13 OS=Homo sapiens OX=9606 GN=RPS13 PE=1 SV=1;tr|E9PS50|E9PS50_HUMAN 40S ribosomal protein S13 (Fragment) OS=Homo sapien	22.5942	22.5942	25.7642	3	3	3	3	23.8	23.8	23.8	17.222	0	18.614	56988000	4	151		23.8	3	P62277;J3KMX5;E9PS50	P62277;J3KMX5;E9PS50	True;True;True	3	3;3;2	3;3;2	3;3;2	3
Centrosomal protein of 290 kDa	CEP290	tr|J3KNF5|J3KNF5_HUMAN Centrosomal protein of 290 kDa OS=Homo sapiens OX=9606 GN=CEP290 PE=1 SV=1;sp|O15078|CE290_HUMAN Centrosomal protein of 290 kDa OS=Homo sapiens OX=9606 GN=CEP290 PE=1 SV=2				1	1	1	1	0.6	0.6	0.6	290.54	0.082888	5.3069	0	1	2481		0.6	2	J3KNF5;O15078	J3KNF5;O15078	TRUE	1	1;1	1;1	1;1	1
	NAT9	tr|J3QL33|J3QL33_HUMAN N-acetyltransferase 9 OS=Homo sapiens OX=9606 GN=NAT9 PE=1 SV=1	24.0147	24.0147	26.3367	1	1	1	1	14.1	14.1	14.1	15.217	0.091139	5.277	84747000	1	135	135	14.1	1	J3QL33	J3QL33	TRUE	1	1	1	1	1
Small nuclear ribonucleoprotein-associated protein N;Small nuclear ribonucleoprotein-associated proteins B and B	SNRPN;SNRPB	tr|J3QLE5|J3QLE5_HUMAN Small nuclear ribonucleoprotein-associated protein N (Fragment) OS=Homo sapiens OX=9606 GN=SNRPN PE=1 SV=1;sp|P63162|RSMN_HUMAN Small nuclear ribonucleoprotein-associated protein N OS=Homo sapiens OX=9606 GN=SNRPN PE=1 SV=1;sp|P14678				1	1	1	1	4.7	4.7	4.7	17.546	0.054217	5.4602	0	1	169		4.7	3	J3QLE5;P63162;P14678	J3QLE5;P63162;P14678	TRUE	1	1;1;1	1;1;1	1;1;1	1
	RFX2	tr|K7ENC9|K7ENC9_HUMAN DNA-binding protein RFX2 (Fragment) OS=Homo sapiens OX=9606 GN=RFX2 PE=1 SV=8;tr|K7EQY9|K7EQY9_HUMAN DNA-binding protein RFX2 (Fragment) OS=Homo sapiens OX=9606 GN=RFX2 PE=1 SV=8	25.2709	25.2709	25.2709	1	1	1	1	7.5	7.5	7.5	9.909	0.061453	5.3653	40485000	3	93		7.5	2	K7ENC9;K7EQY9	K7ENC9;K7EQY9	TRUE	1	1;1	1;1	1;1	1
Apolipoprotein C-II;Proapolipoprotein C-II	APOC4-APOC2;APOC2	tr|K7ER74|K7ER74_HUMAN APOC4-APOC2 readthrough (NMD candidate) OS=Homo sapiens OX=9606 GN=APOC4-APOC2 PE=1 SV=1;tr|A0A024R0T9|A0A024R0T9_HUMAN Apolipoprotein C-II isoform 1 OS=Homo sapiens OX=9606 GN=APOC4-APOC2 PE=1 SV=1;sp|P02655|APOC2_HUMAN Apolipoprote	26.5779	26.5779	29.1629	5	6	6	5	29.8	29.8	24.7	20.049	0	166.32	601040000	14	178		29.8	6	K7ER74;A0A024R0T9;P02655;Q6P163;V9GYJ8;K7EMC3	K7ER74;A0A024R0T9;P02655;Q6P163	True;True;True;True;True;True	6	6;5;5;3;2;1	6;5;5;3;2;1	5;5;5;3;2;0	6
Small nuclear ribonucleoprotein Sm D2	SNRPD2	tr|K7ERG4|K7ERG4_HUMAN Small nuclear ribonucleoprotein Sm D2 OS=Homo sapiens OX=9606 GN=SNRPD2 PE=1 SV=1;sp|P62316|SMD2_HUMAN Small nuclear ribonucleoprotein Sm D2 OS=Homo sapiens OX=9606 GN=SNRPD2 PE=1 SV=1	23.6394	23.6394	25.9614	3	3	3	3	34.6	34.6	34.6	8.7769	0	27.739	65337000	5	78		34.6	2	K7ERG4;P62316	K7ERG4;P62316	True;True;True	3	3;3	3;3	3;3	3
Complement factor D	CFD	tr|K7ERG9|K7ERG9_HUMAN Complement factor D OS=Homo sapiens OX=9606 GN=CFD PE=1 SV=1;sp|P00746|CFAD_HUMAN Complement factor D OS=Homo sapiens OX=9606 GN=CFD PE=1 SV=5	21.5547	21.5547	25.0141	5	5	5	5	35.4	35.4	35.4	27.862	0	32.726	33885000	2	260		35.4	2	K7ERG9;P00746	K7ERG9;P00746	True;True;True;True;True	5	5;5	5;5	5;5	5
Apolipoprotein C-I;Truncated apolipoprotein C-I	APOC1	tr|K7ERI9|K7ERI9_HUMAN Apolipoprotein C-I (Fragment) OS=Homo sapiens OX=9606 GN=APOC1 PE=1 SV=1;sp|P02654|APOC1_HUMAN Apolipoprotein C-I OS=Homo sapiens OX=9606 GN=APOC1 PE=1 SV=1;tr|K7EJI9|K7EJI9_HUMAN Apolipoprotein C-I OS=Homo sapiens OX=9606 GN=APOC1 P	29.2965	29.2965	30.8815	7	7	7	7	42.9	42.9	42.9	8.647	0	55.159	1978100000	30	77		42.9	6	K7ERI9;P02654;K7EJI9;K7ELM9;K7EPF9;K7EKP1	K7ERI9;P02654;K7EJI9;K7ELM9;K7EPF9;K7EKP1	True;True;True;True;True;True;True	7	7;7;5;5;5;4	7;7;5;5;5;4	7;7;5;5;5;4	7
40S ribosomal protein S16	RPS16	tr|M0QX76|M0QX76_HUMAN 40S ribosomal protein S16 (Fragment) OS=Homo sapiens OX=9606 GN=RPS16 PE=1 SV=1;tr|M0R1M5|M0R1M5_HUMAN 40S ribosomal protein S16 (Fragment) OS=Homo sapiens OX=9606 GN=RPS16 PE=1 SV=1;tr|M0R3H0|M0R3H0_HUMAN 40S ribosomal protein S16 O				1	1	1	1	20	20	20	5.5575	0.017007	5.6875	0	1	50		20	6	M0QX76;M0R1M5;M0R3H0;M0R210;Q6IPX4;P62249	M0QX76;M0R1M5;M0R3H0;M0R210;Q6IPX4;P62249	TRUE	1	1;1;1;1;1;1	1;1;1;1;1;1	1;1;1;1;1;1	1
60S ribosomal protein L13a	RPL13a;RPL13A	tr|Q8J015|Q8J015_HUMAN 60S ribosomal protein L13a OS=Homo sapiens OX=9606 GN=RPL13A PE=1 SV=1;tr|M0QYS1|M0QYS1_HUMAN 60S ribosomal protein L13a (Fragment) OS=Homo sapiens OX=9606 GN=RPL13A PE=1 SV=2;sp|P40429|RL13A_HUMAN 60S ribosomal protein L13a OS=Homo				1	1	1	1	5.6	5.6	5.6	16.731	0.08311	5.3084	0	1	142		5.6	3	Q8J015;M0QYS1;P40429	Q8J015;M0QYS1;P40429	TRUE	1	1;1;1	1;1;1	1;1;1	1
Alpha-1B-glycoprotein	A1BG	tr|M0R009|M0R009_HUMAN Alpha-1B-glycoprotein (Fragment) OS=Homo sapiens OX=9606 GN=A1BG PE=1 SV=8;sp|P04217|A1BG_HUMAN Alpha-1B-glycoprotein OS=Homo sapiens OX=9606 GN=A1BG PE=1 SV=4				1	1	1	1	3.9	3.9	3.9	33.341	0.014035	5.7793	0	1	305		3.9	2	M0R009;P04217	M0R009;P04217	TRUE	1	1;1	1;1	1;1	1
C-C motif chemokine 21	CCL21	tr|Q5VZ73|Q5VZ73_HUMAN C-C motif chemokine 21 OS=Homo sapiens OX=9606 GN=CCL21 PE=1 SV=1;sp|O00585|CCL21_HUMAN C-C motif chemokine 21 OS=Homo sapiens OX=9606 GN=CCL21 PE=1 SV=1	22.9341	22.9341	25.5191	2	2	2	2	24.2	24.2	24.2	13.564	0	12.511	48085000	2	124		24.2	2	Q5VZ73;O00585	Q5VZ73;O00585	True;True	2	2;2	2;2	2;2	2
Apolipoprotein L1	APOL1	sp|O14791|APOL1_HUMAN Apolipoprotein L1 OS=Homo sapiens OX=9606 GN=APOL1 PE=1 SV=5	24.4597	24.4597	28.7076	10	10	10	10	26.6	26.6	26.6	43.974	0	169.97	438380000	21	398		26.6	2	O14791;B1AH96	O14791	True;True;True;True;True;True;True;True;True;True	10	10;3	10;3	10;3	10
CD5 antigen-like	CD5L	sp|O43866|CD5L_HUMAN CD5 antigen-like OS=Homo sapiens OX=9606 GN=CD5L PE=1 SV=1	22.553	22.553	26.7229	8	8	8	8	32	32	32	38.087	0	75.214	110760000	12	347	347	32	1	O43866	O43866	True;True;True;True;True;True;True;True	8	8	8	8	8
Histone H2B type 1-C/E/F/G/I;Histone H2B type 1-K;Histone H2B type 1-D;Histone H2B type 2-F;Histone H2B type F-S;Histone H2B;Histone H2B type 1-H;Histone H2B type 1-N;Histone H2B type 1-M;Histone H2B type 1-L;Histone H2B type 1-J;Histone H2B type 2-E;Histone H2B type 1-O;Histone H2B type 1-B;Histone H2B type 3-B	HIST1H2BC;HIST1H2BK;HIST1H2BD;HIST2H2BF;H2BFS;HIST1H2BN;HIST1H2BH;HIST1H2BM;HIST1H2BL;HIST1H2BJ;HIST2H2BE;HIST1H2BO;HIST1H2BB;HIST3H2BB	sp|P62807|H2B1C_HUMAN Histone H2B type 1-C/E/F/G/I OS=Homo sapiens OX=9606 GN=HIST1H2BC PE=1 SV=4;sp|O60814|H2B1K_HUMAN Histone H2B type 1-K OS=Homo sapiens OX=9606 GN=HIST1H2BK PE=1 SV=3;sp|P58876|H2B1D_HUMAN Histone H2B type 1-D OS=Homo sapiens OX=9606 G	27.9035	27.9035	30.7108	8	8	8	8	56.3	56.3	56.3	13.906	0	106.18	1757400000	24	126		56.3	19	P62807;O60814;P58876;Q5QNW6;P57053;U3KQK0;Q93079;Q99877;Q99879;Q99880;P06899;Q16778;P23527;P33778;Q8N257;Q96A08;A0A2R8Y619;Q6DRA6;Q6DN03	P62807;O60814;P58876;Q5QNW6;P57053;U3KQK0;Q93079;Q99877;Q99879;Q99880;P06899;Q16778;P23527;P33778;Q8N257	True;True;True;True;True;True;True;True	8	8;8;7;7;7;7;7;7;7;7;6;6;5;5;5;3;2;1;1	8;8;7;7;7;7;7;7;7;7;6;6;5;5;5;3;2;1;1	8;8;7;7;7;7;7;7;7;7;6;6;5;5;5;3;2;1;1	8
Peptidoglycan recognition protein 1	PGLYRP1	sp|O75594|PGRP1_HUMAN Peptidoglycan recognition protein 1 OS=Homo sapiens OX=9606 GN=PGLYRP1 PE=1 SV=1	25.5358	25.5358	28.8577	4	4	4	4	37.2	37.2	37.2	21.731	0	114.83	486450000	11	196	196	37.2	1	O75594	O75594	True;True;True;True	4	4	4	4	4
Kelch repeat and BTB domain-containing protein 11	KBTBD11	sp|O94819|KBTBB_HUMAN Kelch repeat and BTB domain-containing protein 11 OS=Homo sapiens OX=9606 GN=KBTBD11 PE=1 SV=1				1	1	1	1	1.6	1.6	1.6	65.719	0	7.5053	0	1	623	623	1.6	1	O94819	O94819	TRUE	1	1	1	1	1
Apolipoprotein M	APOM	sp|O95445|APOM_HUMAN Apolipoprotein M OS=Homo sapiens OX=9606 GN=APOM PE=1 SV=2;tr|Q5SRP5|Q5SRP5_HUMAN Apolipoprotein M OS=Homo sapiens OX=9606 GN=APOM PE=1 SV=1	24.8191	24.8191	28.141	6	6	6	6	31.9	31.9	31.9	21.253	0	51.878	296000000	13	188		31.9	2	O95445;Q5SRP5	O95445;Q5SRP5	True;True;True;True;True;True	6	6;4	6;4	6;4	6
GDH/6PGL endoplasmic bifunctional protein;Glucose 1-dehydrogenase;6-phosphogluconolactonase	H6PD	tr|R4GMU1|R4GMU1_HUMAN GDH/6PGL endoplasmic bifunctional protein OS=Homo sapiens OX=9606 GN=H6PD PE=1 SV=1;sp|O95479|G6PE_HUMAN GDH/6PGL endoplasmic bifunctional protein OS=Homo sapiens OX=9606 GN=H6PD PE=1 SV=2	21.426	21.426	26.7479	1	1	1	1	2.5	2.5	2.5	90.172	0.052174	5.4198	112700000	0	802		2.5	2	R4GMU1;O95479	R4GMU1;O95479	TRUE	1	1;1	1;1	1;1	1
Haptoglobin-related protein	HPR	sp|P00739|HPTR_HUMAN Haptoglobin-related protein OS=Homo sapiens OX=9606 GN=HPR PE=2 SV=2;tr|A0A0A0MRD9|A0A0A0MRD9_HUMAN Haptoglobin-related protein OS=Homo sapiens OX=9606 GN=HPR PE=1 SV=1	23.0882	23.0882	27.4101	8	8	8	8	34.8	34.8	34.8	39.029	0	56.308	178350000	10	348		34.8	9	P00739;A0A0A0MRD9;A0A0C4DGL8;J3QR68;H0Y300;P00738;A0A087WU08;J3KTC3;J3QLC9	P00739;A0A0A0MRD9	True;True;True;True;True;True;True;True	8	8;7;3;3;3;3;2;1;1	8;7;3;3;3;3;2;1;1	8;7;3;3;3;3;2;1;1	8
Plasminogen;Plasmin heavy chain A;Activation peptide;Angiostatin;Plasmin heavy chain A, short form;Plasmin light chain B	PLG	sp|P00747|PLMN_HUMAN Plasminogen OS=Homo sapiens OX=9606 GN=PLG PE=1 SV=2	21.2077	21.2077	26.6339	12	12	12	12	24.2	24.2	24.2	90.568	0	82.992	104140000	15	810		24.2	3	P00747;Q5TEH5;A6PVI2	P00747	True;True;True;True;True;True;True;True;True;True;True;True	12	12;2;2	12;2;2	12;2;2	12
Antithrombin-III	SERPINC1	sp|P01008|ANT3_HUMAN Antithrombin-III OS=Homo sapiens OX=9606 GN=SERPINC1 PE=1 SV=1;tr|Q8TCE1|Q8TCE1_HUMAN Antithrombin-III OS=Homo sapiens OX=9606 GN=SERPINC1 PE=1 SV=1	21.3141	21.3141	26.069	8	8	8	8	22	22	22	52.602	0	47.946	70397000	12	464		22	3	P01008;Q8TCE1;CON__P41361	P01008;Q8TCE1	True;True;True;True;True;True;True;True	8	8;5;2	8;5;2	8;5;2	8
Alpha-1-antitrypsin;Short peptide from AAT	SERPINA1	sp|P01009|A1AT_HUMAN Alpha-1-antitrypsin OS=Homo sapiens OX=9606 GN=SERPINA1 PE=1 SV=3;tr|A0A024R6I7|A0A024R6I7_HUMAN Alpha-1-antitrypsin OS=Homo sapiens OX=9606 GN=SERPINA1 PE=1 SV=1;tr|A0A0G2JRN3|A0A0G2JRN3_HUMAN Alpha-1-antitrypsin OS=Homo sapiens OX=96	26.9098	26.9098	31.4333	25	25	25	25	60.3	60.3	60.3	46.736	0	323.31	2899800000	66	418		60.3	10	P01009;A0A024R6I7;A0A0G2JRN3;G3V2B9;G3V544;G3V5R8;G3V387;A0A0B4J278;A0A0G2JPK4;P20848	P01009;A0A024R6I7;A0A0G2JRN3	True;True;True;True;True;True;True;True;True;True;True;True;True;True;True;True;True;True;True;True;True;True;True;True;True	25	25;22;19;5;3;2;2;2;1;1	25;22;19;5;3;2;2;2;1;1	25;22;19;5;3;2;2;2;1;1	25
Complement C3;Complement C3 beta chain;C3-beta-c;Complement C3 alpha chain;C3a anaphylatoxin;Acylation stimulating protein;Complement C3b alpha chain;Complement C3c alpha chain fragment 1;Complement C3dg fragment;Complement C3g fragment;Complement C3d fragment;Complement C3f fragment;Complement C3c alpha chain fragment 2	C3	sp|P01024|CO3_HUMAN Complement C3 OS=Homo sapiens OX=9606 GN=C3 PE=1 SV=2	21.5848	21.5848	28.1546	18	18	18	18	14.9	14.9	14.9	187.15	0	147.76	298800000	24	1663		14.9	4	P01024;M0QYC8;M0QXZ3;M0R1Q1	P01024	True;True;True;True;True;True;True;True;True;True;True;True;True;True;True;True;True;True	18	18;3;1;1	18;3;1;1	18;3;1;1	18
Cystatin-C	CST3	sp|P01034|CYTC_HUMAN Cystatin-C OS=Homo sapiens OX=9606 GN=CST3 PE=1 SV=1	20.4409	20.4409	23.2483	1	1	1	1	7.5	7.5	7.5	15.799	0.017065	5.6882	9964000	1	146	146	7.5	1	P01034	P01034	TRUE	1	1	1	1	1
Kininogen-1;Kininogen-1 heavy chain;T-kinin;Bradykinin;Lysyl-bradykinin;Kininogen-1 light chain;Low molecular weight growth-promoting factor	KNG1	sp|P01042|KNG1_HUMAN Kininogen-1 OS=Homo sapiens OX=9606 GN=KNG1 PE=1 SV=2	23.9704	23.9704	29.0997	3	3	3	3	7.5	7.5	7.5	71.957	0	74.523	575280000	14	644	644	7.5	1	P01042	P01042	True;True;True	3	3	3	3	3
Proenkephalin-A;Synenkephalin;Met-enkephalin;PENK(114-133);PENK(143-183);Met-enkephalin-Arg-Gly-Leu;Leu-enkephalin;PENK(237-258);Met-enkephalin-Arg-Phe	PENK	sp|P01210|PENK_HUMAN Proenkephalin-A OS=Homo sapiens OX=9606 GN=PENK PE=1 SV=1	18.927	18.927	22.6275	1	1	1	1	6	6	6	30.787	0.026578	5.6281	6479600	1	267	267	6	1	P01210	P01210	TRUE	1	1	1	1	1
Insulin-like growth factor II;Insulin-like growth factor II;Insulin-like growth factor II Ala-25 Del;Preptin	IGF2	sp|P01344|IGF2_HUMAN Insulin-like growth factor II OS=Homo sapiens OX=9606 GN=IGF2 PE=1 SV=1				1	1	1	1	4.4	4.4	4.4	20.14	0.0038314	6.2841	0	1	180	180	4.4	1	P01344	P01344	TRUE	1	1	1	1	1
Immunoglobulin J chain	IGJ;JCHAIN	sp|P01591|IGJ_HUMAN Immunoglobulin J chain OS=Homo sapiens OX=9606 GN=JCHAIN PE=1 SV=4;tr|D6RD17|D6RD17_HUMAN Immunoglobulin J chain (Fragment) OS=Homo sapiens OX=9606 GN=JCHAIN PE=1 SV=8;tr|D6RHJ6|D6RHJ6_HUMAN Immunoglobulin J chain (Fragment) OS=Homo sap	26.4261	26.4261	29.4261	7	7	7	7	42.1	42.1	42.1	18.098	0	101.85	721340000	22	159		42.1	4	P01591;D6RD17;D6RHJ6;C9JA05	P01591;D6RD17;D6RHJ6	True;True;True;True;True;True;True	7	7;6;5;3	7;6;5;3	7;6;5;3	7
Ig kappa chain V-I region Daudi;Ig kappa chain V-I region DEE		sp|P04432|KVD39_HUMAN Immunoglobulin kappa variable 1D-39 OS=Homo sapiens OX=9606 GN=IGKV1D-39 PE=3 SV=2;sp|P01597|KV139_HUMAN Immunoglobulin kappa variable 1-39 OS=Homo sapiens OX=9606 GN=IGKV1-39 PE=1 SV=2	24.2363	24.2363	26.2363	1	2	1	1	29.1	15.4	15.4	12.737	0	21.294	79052000	1	117		29.1	2	P04432;P01597	P04432;P01597	True;False	1	2;2	1;1	1;1	2
Ig kappa chain V-I region Gal		sp|P01599|KV117_HUMAN Immunoglobulin kappa variable 1-17 OS=Homo sapiens OX=9606 GN=IGKV1-17 PE=1 SV=2	27.683	27.683	29.683	2	4	4	2	26.5	26.5	13.7	12.778	0	102.62	861920000	16	117	117	26.5	1	P01599	P01599	True;True;True;True	4	4	4	2	4
Ig kappa chain V-I region HK101		sp|P01601|KVD16_HUMAN Immunoglobulin kappa variable 1D-16 OS=Homo sapiens OX=9606 GN=IGKV1D-16 PE=3 SV=2	24.3277	24.3277	26.3278	1	1	1	1	13.7	13.7	13.7	12.73	0	106.77	84226000	5	117	117	13.7	1	P01601	P01601	TRUE	1	1	1	1	1
Ig kappa chain V-I region HK102	IGKV1-5	sp|P01602|KV105_HUMAN Immunoglobulin kappa variable 1-5 OS=Homo sapiens OX=9606 GN=IGKV1-5 PE=1 SV=2	27.3022	27.3022	29.3021	2	2	2	2	24.8	24.8	24.8	12.781	0	35.38	661940000	7	117	117	24.8	1	P01602	P01602	True;True	2	2	2	2	2
Ig kappa chain V-III region B6	IGKV3D-20	sp|P01619|KV320_HUMAN Immunoglobulin kappa variable 3-20 OS=Homo sapiens OX=9606 GN=IGKV3-20 PE=1 SV=2;sp|A0A0C4DH25|KVD20_HUMAN Immunoglobulin kappa variable 3D-20 OS=Homo sapiens OX=9606 GN=IGKV3D-20 PE=3 SV=1	29.7904	29.7904	32.1123	4	4	4	4	46.6	46.6	46.6	12.557	0	162.42	4642700000	22	116		46.6	2	P01619;A0A0C4DH25	P01619;A0A0C4DH25	True;True;True;True	4	4;2	4;2	4;2	4
Ig kappa chain V-III region POM	IGKV3OR2-268;IGKV3D-7	sp|P01624|KV315_HUMAN Immunoglobulin kappa variable 3-15 OS=Homo sapiens OX=9606 GN=IGKV3-15 PE=1 SV=2;tr|A0A0C4DH90|A0A0C4DH90_HUMAN Immunoglobulin kappa variable 3/OR2-268 (non-functional) (Fragment) OS=Homo sapiens OX=9606 GN=IGKV3OR2-268 PE=4 SV=5;sp|A	31.3401	31.3401	32.925	1	3	3	1	32.2	32.2	7.8	12.496	0	76.673	8154800000	9	115		32.2	4	P01624;A0A0C4DH90;A0A0C4DH55;A0A075B6H7	P01624;A0A0C4DH90;A0A0C4DH55	True;True;True	3	3;2;2;1	3;2;2;1	1;1;1;1	3
Ig lambda chain V-I region VOR		sp|P01699|LV144_HUMAN Immunoglobulin lambda variable 1-44 OS=Homo sapiens OX=9606 GN=IGLV1-44 PE=1 SV=2	24.6419	24.6419	25.6419	1	3	1	1	42.7	24.8	24.8	12.201	0	78.488	52356000	2	117	117	42.7	1	P01699	P01699	False;False;True	1	3	1	1	3
Ig lambda chain V-I region HA		sp|P01700|LV147_HUMAN Immunoglobulin lambda variable 1-47 OS=Homo sapiens OX=9606 GN=IGLV1-47 PE=1 SV=2	27.9611	27.9611	29.9611	2	4	4	2	53.8	53.8	35.9	12.283	0	43.747	1045200000	13	117	117	53.8	1	P01700	P01700	True;True;True;True	4	4	4	2	4
Ig lambda chain V-I region NEW		sp|P01701|LV151_HUMAN Immunoglobulin lambda variable 1-51 OS=Homo sapiens OX=9606 GN=IGLV1-51 PE=1 SV=2	27.4443	27.4443	29.0292	3	3	3	3	38.5	38.5	38.5	12.249	0	35.504	547860000	11	117	117	38.5	1	P01701	P01701	True;True;True	3	3	3	3	3
Ig lambda chain V-I region NEWM		sp|P01703|LV140_HUMAN Immunoglobulin lambda variable 1-40 OS=Homo sapiens OX=9606 GN=IGLV1-40 PE=1 SV=2	26.8957	26.8957	27.8957	1	1	1	1	13.6	13.6	13.6	12.301	0	7.5762	249710000	3	118	118	13.6	1	P01703	P01703	TRUE	1	1	1	1	1
Ig lambda chain V-II region TOG		sp|P01704|LV214_HUMAN Immunoglobulin lambda variable 2-14 OS=Homo sapiens OX=9606 GN=IGLV2-14 PE=1 SV=2	26.7364	26.7364	26.7364	1	1	1	1	13.3	13.3	13.3	12.597	0	7.7847	111800000	4	120	120	13.3	1	P01704	P01704	TRUE	1	1	1	1	1
Ig lambda chain V-II region BOH		sp|P01706|LV211_HUMAN Immunoglobulin lambda variable 2-11 OS=Homo sapiens OX=9606 GN=IGLV2-11 PE=1 SV=2	23.357	23.357	24.942	2	2	2	2	32.8	32.8	32.8	12.644	0	29.397	32232000	7	119	119	32.8	1	P01706	P01706	True;True	2	2	2	2	2
Ig lambda chain V-III region SH		sp|P01714|LV319_HUMAN Immunoglobulin lambda variable 3-19 OS=Homo sapiens OX=9606 GN=IGLV3-19 PE=1 SV=2	27.5948	27.5948	29.5949	5	5	5	5	63.4	63.4	63.4	12.042	0	102.54	810850000	11	112	112	63.4	1	P01714	P01714	True;True;True;True;True	5	5	5	5	5
Ig lambda chain V-IV region Bau		sp|P01715|LV301_HUMAN Immunoglobulin lambda variable 3-1 OS=Homo sapiens OX=9606 GN=IGLV3-1 PE=1 SV=2	23.5957	23.5957	24.5956	1	2	1	1	26.1	19.1	19.1	12.296	0	16.535	25353000	2	115	115	26.1	1	P01715	P01715	False;True	1	2	1	1	2
Ig lambda chain V-IV region Hil	IGLV3-16	sp|P01717|LV325_HUMAN Immunoglobulin lambda variable 3-25 OS=Homo sapiens OX=9606 GN=IGLV3-25 PE=1 SV=2;sp|A0A075B6K0|LV316_HUMAN Immunoglobulin lambda variable 3-16 OS=Homo sapiens OX=9606 GN=IGLV3-16 PE=3 SV=2	28.193	28.193	29.778	0	2	1	0	18.8	9.8	0	12.011	0	7.7603	920580000	5	112		18.8	2	P01717;A0A075B6K0	P01717;A0A075B6K0	True;False	1	2;1	1;1	0;0	2
Ig lambda chain V-IV region Kern		sp|P01718|LV327_HUMAN Immunoglobulin lambda variable 3-27 OS=Homo sapiens OX=9606 GN=IGLV3-27 PE=1 SV=2	24.2028	24.2028	25.7877	1	2	1	1	18.6	8.8	8.8	12.165	0	7.1965	57927000	2	113	113	18.6	1	P01718	P01718	False;True	1	2	1	1	2
Ig heavy chain V-I region EU;Ig heavy chain V-I region HG3	IGHV1-3;IGHV1-69-2	sp|P01742|HV169_HUMAN Immunoglobulin heavy variable 1-69 OS=Homo sapiens OX=9606 GN=IGHV1-69 PE=1 SV=2;sp|P0DP01|HV108_HUMAN Immunoglobulin heavy variable 1-8 OS=Homo sapiens OX=9606 GN=IGHV1-8 PE=3 SV=1;sp|A0A0C4DH29|HV103_HUMAN Immunoglobulin heavy varia	24.1426	24.1426	26.9499	2	2	2	2	20.5	20.5	20.5	12.659	0	27.622	129640000	4	117		20.5	5	P01742;P0DP01;A0A0C4DH29;A0A0B4J2H0;P01743	P01742;P0DP01;A0A0C4DH29;A0A0B4J2H0;P01743	True;True	2	2;1;1;1;1	2;1;1;1;1	2;1;1;1;1	2
Ig heavy chain V-III region WEA		sp|P01763|HV348_HUMAN Immunoglobulin heavy variable 3-48 OS=Homo sapiens OX=9606 GN=IGHV3-48 PE=1 SV=2	22.277	22.277	24.277	1	3	1	1	35	16.2	16.2	12.812	0.014184	5.7951	20329000	2	117	117	35	1	P01763	P01763	False;True;False	1	3	1	1	3
Ig heavy chain V-III region 23;Ig heavy chain V-III region CAM	IGHV3-23	sp|P01764|HV323_HUMAN Immunoglobulin heavy variable 3-23 OS=Homo sapiens OX=9606 GN=IGHV3-23 PE=1 SV=2;sp|P0DP03|HV335_HUMAN Immunoglobulin heavy variable 3-30-5 OS=Homo sapiens OX=9606 GN=IGHV3-30-5 PE=3 SV=1;tr|A0A0J9YY99|A0A0J9YY99_HUMAN Uncharacterized	29.7448	29.7448	32.3298	3	5	5	3	57.3	57.3	44.4	12.582	0	111.18	5398100000	54	117		57.3	4	P01764;P0DP03;A0A0J9YY99;P01768	P01764;P0DP03;A0A0J9YY99;P01768	True;True;True;True;True	5	5;3;3;3	5;3;3;3	3;1;1;1	5
Ig heavy chain V-III region BRO		sp|P01766|HV313_HUMAN Immunoglobulin heavy variable 3-13 OS=Homo sapiens OX=9606 GN=IGHV3-13 PE=1 SV=2	26.2292	26.2292	28.2292	2	3	2	2	35.3	25.9	25.9	12.506	0	23.413	314660000	5	116	116	35.3	1	P01766	P01766	True;True;False	2	3	2	2	3
Ig heavy chain V-III region JON		sp|P01780|HV307_HUMAN Immunoglobulin heavy variable 3-7 OS=Homo sapiens OX=9606 GN=IGHV3-7 PE=1 SV=2	23.3239	23.3239	25.6458	1	3	1	1	26.5	7.7	7.7	12.943	0	6.7106	52498000	3	117	117	26.5	1	P01780	P01780	False;True;False	1	3	1	1	3
Ig heavy chain V-III region DOB		sp|P0DP04|HV43D_HUMAN Immunoglobulin heavy variable 3-43D OS=Homo sapiens OX=9606 GN=IGHV3-43D PE=3 SV=1;sp|P01782|HV309_HUMAN Immunoglobulin heavy variable 3-9 OS=Homo sapiens OX=9606 GN=IGHV3-9 PE=1 SV=2	27.5946	27.5946	30.1796	2	3	2	2	34.7	25.4	25.4	13.017	0	31.687	1216100000	13	118		34.7	2	P0DP04;P01782	P0DP04;P01782	True;True;False	2	3;3	2;2	2;2	3
Polymeric immunoglobulin receptor;Secretory component	PIGR	sp|P01833|PIGR_HUMAN Polymeric immunoglobulin receptor OS=Homo sapiens OX=9606 GN=PIGR PE=1 SV=4	18.2594	18.2594	23.5814	3	3	3	3	6.7	6.7	6.7	83.283	0	18.769	12552000	2	764	764	6.7	1	P01833	P01833	True;True;True	3	3	3	3	3
Ig kappa chain C region	IGKC	sp|P01834|IGKC_HUMAN Immunoglobulin kappa constant OS=Homo sapiens OX=9606 GN=IGKC PE=1 SV=2	35.0496	35.0496	37.3715	13	13	13	13	100	100	100	11.765	0	323.31	177810000000	318	107	107	100	1	P01834	P01834	True;True;True;True;True;True;True;True;True;True;True;True;True	13	13	13	13	13
Ig gamma-1 chain C region	IGHG1	sp|P01857|IGHG1_HUMAN Immunoglobulin heavy constant gamma 1 OS=Homo sapiens OX=9606 GN=IGHG1 PE=1 SV=1;tr|A0A0A0MS08|A0A0A0MS08_HUMAN Immunoglobulin heavy constant gamma 1 (Fragment) OS=Homo sapiens OX=9606 GN=IGHG1 PE=1 SV=1;tr|A0A0A0MS07|A0A0A0MS07_HUMAN	33.5785	33.5785	37.4853	14	27	27	14	75.8	75.8	47.6	36.105	0	323.31	192400000000	507	330		75.8	3	P01857;A0A0A0MS08;A0A0A0MS07	P01857;A0A0A0MS08;A0A0A0MS07	True;True;True;True;True;True;True;True;True;True;True;True;True;True;True;True;True;True;True;True;True;True;True;True;True;True;True	27	27;26;22	27;26;22	14;14;11	27
Ig gamma-2 chain C region	IGHG2	sp|P01859|IGHG2_HUMAN Immunoglobulin heavy constant gamma 2 OS=Homo sapiens OX=9606 GN=IGHG2 PE=1 SV=2;tr|A0A286YEY4|A0A286YEY4_HUMAN Immunoglobulin heavy constant gamma 2 (Fragment) OS=Homo sapiens OX=9606 GN=IGHG2 PE=1 SV=1	28.305	28.305	32.0054	6	17	7	6	57.1	31.9	27.6	35.9	0	184.67	4311000000	62	326		57.1	2	P01859;A0A286YEY4	P01859;A0A286YEY4	True;False;False;False;True;True;False;False;False;True;False;False;False;True;True;True;False	7	17;16	7;7	6;6	17
Ig gamma-3 chain C region	IGHG3	sp|P01860|IGHG3_HUMAN Immunoglobulin heavy constant gamma 3 OS=Homo sapiens OX=9606 GN=IGHG3 PE=1 SV=2;tr|A0A286YES1|A0A286YES1_HUMAN Immunoglobulin heavy constant gamma 3 (Fragment) OS=Homo sapiens OX=9606 GN=IGHG3 PE=1 SV=1	28.1783	28.1783	32.2657	7	20	10	7	57.3	38.7	30.2	41.287	0	234.31	5163600000	158	377		57.3	2	P01860;A0A286YES1	P01860;A0A286YES1	False;False;True;False;False;True;True;False;True;False;True;True;False;False;True;True;False;False;True;True	10	20;19	10;10	7;7	20
Apolipoprotein A-I;Proapolipoprotein A-I;Truncated apolipoprotein A-I	APOA1	sp|P02647|APOA1_HUMAN Apolipoprotein A-I OS=Homo sapiens OX=9606 GN=APOA1 PE=1 SV=1;tr|F8W696|F8W696_HUMAN Apolipoprotein A-I OS=Homo sapiens OX=9606 GN=APOA1 PE=1 SV=1	30.3666	30.3666	34.5365	31	31	31	31	79	79	79	30.777	0	323.31	24918000000	115	267		79	3	P02647;F8W696;CON__P15497	P02647;F8W696	True;True;True;True;True;True;True;True;True;True;True;True;True;True;True;True;True;True;True;True;True;True;True;True;True;True;True;True;True;True;True	31	31;25;1	31;25;1	31;25;1	31
Apolipoprotein E	APOE	sp|P02649|APOE_HUMAN Apolipoprotein E OS=Homo sapiens OX=9606 GN=APOE PE=1 SV=1;tr|H0Y7L5|H0Y7L5_HUMAN Apolipoprotein E (Fragment) OS=Homo sapiens OX=9606 GN=APOE PE=1 SV=2;tr|E9PEV4|E9PEV4_HUMAN Apolipoprotein E (Fragment) OS=Homo sapiens OX=9606 GN=APOE	23.991	23.991	28.4504	16	16	16	16	48.3	48.3	48.3	36.154	0	170.93	366800000	24	317		48.3	5	P02649;H0Y7L5;E9PEV4;E7ERP7;CON__Q03247	P02649;H0Y7L5;E9PEV4;E7ERP7	True;True;True;True;True;True;True;True;True;True;True;True;True;True;True;True	16	16;9;8;8;3	16;9;8;8;3	16;9;8;8;3	16
Apolipoprotein A-II;Proapolipoprotein A-II;Truncated apolipoprotein A-II	APOA2	tr|V9GYM3|V9GYM3_HUMAN Apolipoprotein A-II OS=Homo sapiens OX=9606 GN=APOA2 PE=1 SV=1;sp|P02652|APOA2_HUMAN Apolipoprotein A-II OS=Homo sapiens OX=9606 GN=APOA2 PE=1 SV=1;tr|V9GYE3|V9GYE3_HUMAN Apolipoprotein A-II OS=Homo sapiens OX=9606 GN=APOA2 PE=1 SV=1	28.7451	28.7451	31.7451	9	9	9	9	51.9	51.9	51.9	14.914	0	323.31	3599500000	29	133		51.9	6	V9GYM3;P02652;V9GYE3;V9GYG9;V9GYC1;V9GYS1	V9GYM3;P02652;V9GYE3;V9GYG9	True;True;True;True;True;True;True;True;True	9	9;9;7;7;4;4	9;9;7;7;4;4	9;9;7;7;4;4	9
Fibrinogen alpha chain;Fibrinopeptide A;Fibrinogen alpha chain	FGA	sp|P02671|FIBA_HUMAN Fibrinogen alpha chain OS=Homo sapiens OX=9606 GN=FGA PE=1 SV=2	26.6642	26.6642	31.7935	26	26	26	26	32.2	32.2	32.2	94.972	0	323.31	3722300000	89	866		32.2	2	P02671;A0A087WUA0	P02671	True;True;True;True;True;True;True;True;True;True;True;True;True;True;True;True;True;True;True;True;True;True;True;True;True;True	26	26;5	26;5	26;5	26
Fibrinogen beta chain;Fibrinopeptide B;Fibrinogen beta chain	FGB	sp|P02675|FIBB_HUMAN Fibrinogen beta chain OS=Homo sapiens OX=9606 GN=FGB PE=1 SV=2;tr|D6REL8|D6REL8_HUMAN Fibrinogen beta chain OS=Homo sapiens OX=9606 GN=FGB PE=1 SV=1	21.4317	21.4317	26.2897	6	6	6	6	19.6	19.6	19.6	55.928	0	39.168	82033000	5	491		19.6	3	P02675;D6REL8;CON__P02676	P02675;D6REL8	True;True;True;True;True;True	6	6;4;1	6;4;1	6;4;1	6
Fibrinogen gamma chain	FGG	sp|P02679|FIBG_HUMAN Fibrinogen gamma chain OS=Homo sapiens OX=9606 GN=FGG PE=1 SV=3;tr|C9JEU5|C9JEU5_HUMAN Fibrinogen gamma chain OS=Homo sapiens OX=9606 GN=FGG PE=1 SV=1;tr|C9JC84|C9JC84_HUMAN Fibrinogen gamma chain OS=Homo sapiens OX=9606 GN=FGG PE=1 SV	22.1783	22.1783	26.9332	5	5	5	5	18.8	18.8	18.8	51.511	0	31.42	128140000	8	453		18.8	5	P02679;C9JEU5;C9JC84;C9JPQ9;C9JU00	P02679;C9JEU5;C9JC84;C9JPQ9;C9JU00	True;True;True;True;True	5	5;4;4;3;3	5;4;4;3;3	5;4;4;3;3	5
Serum amyloid P-component;Serum amyloid P-component(1-203)	APCS	sp|P02743|SAMP_HUMAN Serum amyloid P-component OS=Homo sapiens OX=9606 GN=APCS PE=1 SV=2	21.1471	21.1471	24.469	1	1	1	1	7.2	7.2	7.2	25.387	0	6.9403	23223000	1	223	223	7.2	1	P02743	P02743	TRUE	1	1	1	1	1
Complement C1q subcomponent subunit A	C1QA	sp|P02745|C1QA_HUMAN Complement C1q subcomponent subunit A OS=Homo sapiens OX=9606 GN=C1QA PE=1 SV=2;tr|X6RLJ0|X6RLJ0_HUMAN Complement C1q subcomponent subunit A (Fragment) OS=Homo sapiens OX=9606 GN=C1QA PE=1 SV=7	21.398	21.398	25.0984	2	2	2	2	13.9	13.9	13.9	26.016	0	20.075	35923000	4	245		13.9	2	P02745;X6RLJ0	P02745;X6RLJ0	True;True	2	2;1	2;1	2;1	2
Complement C1q subcomponent subunit C	C1QC	sp|P02747|C1QC_HUMAN Complement C1q subcomponent subunit C OS=Homo sapiens OX=9606 GN=C1QC PE=1 SV=3	22.062	22.062	25.7625	4	4	4	4	21.2	21.2	21.2	25.773	0	66.297	56921000	6	245	245	21.2	1	P02747	P02747	True;True;True;True	4	4	4	4	4
Beta-2-glycoprotein 1	APOH	sp|P02749|APOH_HUMAN Beta-2-glycoprotein 1 OS=Homo sapiens OX=9606 GN=APOH PE=1 SV=3	26.405	26.405	30.4925	16	16	16	16	49.9	49.9	49.9	38.298	0	323.31	1510600000	42	345		49.9	5	P02749;J3QLI0;J3KS17;J3QRN2;CON__P17690	P02749	True;True;True;True;True;True;True;True;True;True;True;True;True;True;True;True	16	16;7;6;5;3	16;7;6;5;3	16;7;6;5;3	16
Fibronectin;Anastellin;Ugl-Y1;Ugl-Y2;Ugl-Y3	FN1	sp|P02751|FINC_HUMAN Fibronectin OS=Homo sapiens OX=9606 GN=FN1 PE=1 SV=4;tr|H0Y7Z1|H0Y7Z1_HUMAN Fibronectin (Fragment) OS=Homo sapiens OX=9606 GN=FN1 PE=1 SV=1	21.474	21.474	28.0589	11	11	11	11	6.5	6.5	6.5	262.62	0	122.15	279630000	22	2386		6.5	2	P02751;H0Y7Z1	P02751;H0Y7Z1	True;True;True;True;True;True;True;True;True;True;True	11	11;6	11;6	11;6	11
Protein AMBP;Alpha-1-microglobulin;Inter-alpha-trypsin inhibitor light chain;Trypstatin	AMBP	sp|P02760|AMBP_HUMAN Protein AMBP OS=Homo sapiens OX=9606 GN=AMBP PE=1 SV=1;tr|S4R3Y4|S4R3Y4_HUMAN Protein AMBP OS=Homo sapiens OX=9606 GN=AMBP PE=1 SV=1	24.1986	24.1986	28.1986	8	8	8	8	20.5	20.5	20.5	38.999	0	67.044	308050000	14	352		20.5	3	P02760;S4R3Y4;S4R471	P02760;S4R3Y4	True;True;True;True;True;True;True;True	8	8;7;3	8;7;3	8;7;3	8
Alpha-1-acid glycoprotein 1	ORM1	sp|P02763|A1AG1_HUMAN Alpha-1-acid glycoprotein 1 OS=Homo sapiens OX=9606 GN=ORM1 PE=1 SV=1	25.0295	25.0295	28.3514	4	6	6	4	27.9	27.9	19.4	23.511	0	44.384	342470000	19	201	201	27.9	1	P02763	P02763	True;True;True;True;True;True	6	6	6	4	6
Transthyretin	TTR	sp|P02766|TTHY_HUMAN Transthyretin OS=Homo sapiens OX=9606 GN=TTR PE=1 SV=1;tr|A0A087WT59|A0A087WT59_HUMAN Transthyretin OS=Homo sapiens OX=9606 GN=TTR PE=1 SV=1;tr|A0A087WV45|A0A087WV45_HUMAN Transthyretin OS=Homo sapiens OX=9606 GN=TTR PE=1 SV=1	26.8588	26.8588	29.4437	10	10	10	10	69.4	69.4	69.4	15.887	0	250.01	730170000	25	147		69.4	3	P02766;A0A087WT59;A0A087WV45	P02766;A0A087WT59;A0A087WV45	True;True;True;True;True;True;True;True;True;True	10	10;8;7	10;8;7	10;8;7	10
Serotransferrin	TF	sp|P02787|TRFE_HUMAN Serotransferrin OS=Homo sapiens OX=9606 GN=TF PE=1 SV=3	21.6127	21.6127	26.9346	9	9	9	9	18.1	18.1	18.1	77.063	0	56.657	128270000	7	698		18.1	9	P02787;H7C5E8;C9JB55;F8WEK9;F8WCI6;C9JVG0;CON__Q2HJF0;CON__Q29443;CON__Q0IIK2	P02787	True;True;True;True;True;True;True;True;True	9	9;2;1;1;1;1;1;1;1	9;2;1;1;1;1;1;1;1	9;2;1;1;1;1;1;1;1	9
Hemopexin	HPX	sp|P02790|HEMO_HUMAN Hemopexin OS=Homo sapiens OX=9606 GN=HPX PE=1 SV=2;tr|Q9BS19|Q9BS19_HUMAN Epididymis secretory sperm binding protein OS=Homo sapiens OX=9606 GN=HPX PE=1 SV=1	22.3331	22.3331	26.7925	7	7	7	7	22.9	22.9	22.9	51.676	0	55.568	116240000	13	462		22.9	2	P02790;Q9BS19	P02790;Q9BS19	True;True;True;True;True;True;True	7	7;4	7;4	7;4	7
Vitronectin;Vitronectin V65 subunit;Vitronectin V10 subunit;Somatomedin-B	VTN	sp|P04004|VTNC_HUMAN Vitronectin OS=Homo sapiens OX=9606 GN=VTN PE=1 SV=1	24.1155	24.1155	28.3635	7	7	7	7	18.6	18.6	18.6	54.305	0	96.786	345350000	21	478		18.6	3	P04004;F5GX75;CON__Q3ZBS7	P04004	True;True;True;True;True;True;True	7	7;1;1	7;1;1	7;1;1	7
Histidine-rich glycoprotein	HRG	sp|P04196|HRG_HUMAN Histidine-rich glycoprotein OS=Homo sapiens OX=9606 GN=HRG PE=1 SV=1	22.5372	22.5372	26.9966	9	9	9	9	21	21	21	59.578	0	72.836	133900000	9	525	525	21	1	P04196	P04196	True;True;True;True;True;True;True;True;True	9	9	9	9	9
Keratin, type II cytoskeletal 6B	KRT6B	sp|P04259|K2C6B_HUMAN Keratin, type II cytoskeletal 6B OS=Homo sapiens OX=9606 GN=KRT6B PE=1 SV=5	19.3151	19.3151	24.222	0	29	2	0	43.3	4.8	0	60.066	0	36.843	19568000	3	564	564	43.3	1	P04259	P04259	False;False;False;True;False;False;False;False;False;False;False;False;False;False;False;False;False;False;False;False;False;False;True;False;False;False;False;False;False	2	29	2	0	29
Ig kappa chain V-I region BAN		sp|P04430|KV116_HUMAN Immunoglobulin kappa variable 1-16 OS=Homo sapiens OX=9606 GN=IGKV1-16 PE=1 SV=2	25.9646	25.9646	27.9646	2	2	2	2	29.1	29.1	29.1	12.618	0	77.277	261930000	9	117	117	29.1	1	P04430	P04430	True;True	2	2	2	2	2
Histone H2A type 1-C;Histone H2A type 3;Histone H2A type 1-B/E	HIST1H2AC;HIST3H2A;HIST1H2AB	sp|Q93077|H2A1C_HUMAN Histone H2A type 1-C OS=Homo sapiens OX=9606 GN=HIST1H2AC PE=1 SV=3;sp|Q7L7L0|H2A3_HUMAN Histone H2A type 3 OS=Homo sapiens OX=9606 GN=HIST3H2A PE=1 SV=3;sp|P04908|H2A1B_HUMAN Histone H2A type 1-B/E OS=Homo sapiens OX=9606 GN=HIST1H2A	21.0527	21.0527	23.3746	1	6	1	1	35.4	8.5	8.5	14.105	0	6.5019	10876000	2	130		35.4	3	Q93077;Q7L7L0;P04908	Q93077;Q7L7L0;P04908	False;False;False;False;True;False	1	6;6;6	1;1;1	1;1;1	6
Protein S100-A8;Protein S100-A8, N-terminally processed	S100A8	sp|P05109|S10A8_HUMAN Protein S100-A8 OS=Homo sapiens OX=9606 GN=S100A8 PE=1 SV=1	21.7793	21.7793	24.7793	2	2	2	2	20.4	20.4	20.4	10.834	0	10.842	28795000	3	93	93	20.4	1	P05109	P05109	True;True	2	2	2	2	2
Ig kappa chain V-II region RPMI 6410	IGKV2D-30	sp|P06310|KV230_HUMAN Immunoglobulin kappa variable 2-30 OS=Homo sapiens OX=9606 GN=IGKV2-30 PE=3 SV=2;sp|A0A075B6S6|KVD30_HUMAN Immunoglobulin kappa variable 2D-30 OS=Homo sapiens OX=9606 GN=IGKV2D-30 PE=3 SV=1	25.3923	25.3923	27.3923	2	3	2	2	38.3	38.3	38.3	13.185	0	31.543	176160000	6	120		38.3	2	P06310;A0A075B6S6	P06310;A0A075B6S6	True;False;True	2	3;2	2;1	2;1	3
Ig kappa chain V-IV region	IGKV4-1	sp|P06312|KV401_HUMAN Immunoglobulin kappa variable 4-1 OS=Homo sapiens OX=9606 GN=IGKV4-1 PE=1 SV=1	29.3482	29.3482	31.3482	3	3	3	3	29.8	29.8	29.8	13.38	0	228.78	2733700000	20	121	121	29.8	1	P06312	P06312	True;True;True	3	3	3	3	3
Protein S100-A9	S100A9	sp|P06702|S10A9_HUMAN Protein S100-A9 OS=Homo sapiens OX=9606 GN=S100A9 PE=1 SV=1	23.9188	23.9188	26.7261	4	4	4	4	38.6	38.6	38.6	13.242	0	30.226	111010000	11	114	114	38.6	1	P06702	P06702	True;True;True;True	4	4	4	4	4
Apolipoprotein A-IV	APOA4	sp|P06727|APOA4_HUMAN Apolipoprotein A-IV OS=Homo sapiens OX=9606 GN=APOA4 PE=1 SV=3	22.5092	22.5092	27.1531	8	8	8	8	25.5	25.5	25.5	45.398	0	79.274	149240000	11	396		25.5	2	P06727;CON__Q32PJ2	P06727	True;True;True;True;True;True;True;True	8	8;1	8;1	8;1	8
Histone H1.0;Histone H1.0, N-terminally processed	H1F0	sp|P07305|H10_HUMAN Histone H1.0 OS=Homo sapiens OX=9606 GN=H1F0 PE=1 SV=3	18.65	18.65	21.235	1	1	1	1	6.7	6.7	6.7	20.863	0.032787	5.6062	2468100	1	194	194	6.7	1	P07305	P07305	TRUE	1	1	1	1	1
Asialoglycoprotein receptor 2	ASGR2	sp|P07307|ASGR2_HUMAN Asialoglycoprotein receptor 2 OS=Homo sapiens OX=9606 GN=ASGR2 PE=1 SV=2	24.0803	24.0803	27.9872	4	4	4	4	23.5	23.5	23.5	35.092	0	69.996	266060000	13	311	311	23.5	1	P07307	P07307	True;True;True;True	4	4	4	4	4
Matrix Gla protein	MGP	sp|P08493|MGP_HUMAN Matrix Gla protein OS=Homo sapiens OX=9606 GN=MGP PE=1 SV=2	25.1804	25.1804	27.1804	2	2	2	2	23.3	23.3	23.3	12.353	0	28.496	152090000	10	103	103	23.3	1	P08493	P08493	True;True	2	2	2	2	2
Complement factor H	CFH	sp|P08603|CFAH_HUMAN Complement factor H OS=Homo sapiens OX=9606 GN=CFH PE=1 SV=4;tr|Q5TFM2|Q5TFM2_HUMAN Complement factor H OS=Homo sapiens OX=9606 GN=CFH PE=1 SV=1;tr|A0A0D9SG88|A0A0D9SG88_HUMAN Complement factor H OS=Homo sapiens OX=9606 GN=CFH PE=1 SV=	16.8809	16.8809	22.8117	1	2	1	1	1.8	1.1	1.1	139.09	0.0038462	6.2927	7362000	1	1231		1.8	3	P08603;Q5TFM2;A0A0D9SG88	P08603;Q5TFM2;A0A0D9SG88	False;True	1	2;1;1	1;1;1	1;1;1	2
Ig lambda-6 chain C region	IGLC6	sp|P0CF74|IGLC6_HUMAN Immunoglobulin lambda constant 6 OS=Homo sapiens OX=9606 GN=IGLC6 PE=1 SV=1	21.5863	21.5863	24.1712	0	7	1	0	61.3	7.5	0	11.276	0.040881	5.5234	18891000	0	106	106	61.3	1	P0CF74	P0CF74	False;False;False;False;True;False;False	1	7	1	0	7
Serum amyloid A-1 protein;Amyloid protein A;Serum amyloid protein A(2-104);Serum amyloid protein A(3-104);Serum amyloid protein A(2-103);Serum amyloid protein A(2-102);Serum amyloid protein A(4-101);Serum amyloid A protein	SAA1	sp|P0DJI8|SAA1_HUMAN Serum amyloid A-1 protein OS=Homo sapiens OX=9606 GN=SAA1 PE=1 SV=1;tr|E9PQD6|E9PQD6_HUMAN Serum amyloid A protein OS=Homo sapiens OX=9606 GN=SAA1 PE=1 SV=1	28.6132	28.6132	31.4205	6	10	10	6	70.5	70.5	47.5	13.532	0	149.68	2874200000	37	122		70.5	2	P0DJI8;E9PQD6	P0DJI8;E9PQD6	True;True;True;True;True;True;True;True;True;True	10	10;7	10;7	6;3	10
Serum amyloid A-2 protein	SAA2	sp|P0DJI9|SAA2_HUMAN Serum amyloid A-2 protein OS=Homo sapiens OX=9606 GN=SAA2 PE=1 SV=1	26.029	26.029	28.8363	3	7	3	3	50	27	27	13.527	0	22.428	479290000	10	122	122	50	1	P0DJI9	P0DJI9	False;False;False;True;True;False;True	3	7	3	3	7
		sp|P0DOY2|IGLC2_HUMAN Immunoglobulin lambda constant 2 OS=Homo sapiens OX=9606 GN=IGLC2 PE=1 SV=1	33.6604	33.6604	36.4678	0	15	15	0	96.2	96.2	0	11.293	0	323.31	95040000000	158	106	106	96.2	1	P0DOY2	P0DOY2	True;True;True;True;True;True;True;True;True;True;True;True;True;True;True	15	15	15	0	15
		sp|P0DOY3|IGLC3_HUMAN Immunoglobulin lambda constant 3 OS=Homo sapiens OX=9606 GN=IGLC3 PE=1 SV=1	23.5987	23.5987	26.406	2	14	2	2	96.2	24.5	24.5	11.265	0	33.088	88922000	5	106	106	96.2	1	P0DOY3	P0DOY3	False;False;False;False;False;False;False;False;True;True;False;False;False;False	2	14	2	2	14
Histone H1.4	HIST1H1E	sp|P10412|H14_HUMAN Histone H1.4 OS=Homo sapiens OX=9606 GN=HIST1H1E PE=1 SV=2	21.7629	21.7629	25.0848	2	12	2	2	38.8	9.6	9.6	21.865	0	14.726	35586000	5	219	219	38.8	1	P10412	P10412	False;False;False;False;False;False;False;False;True;True;False;False	2	12	2	2	12
Clusterin;Clusterin beta chain;Clusterin alpha chain;Clusterin	CLU	sp|P10909|CLUS_HUMAN Clusterin OS=Homo sapiens OX=9606 GN=CLU PE=1 SV=1;tr|H0YLK8|H0YLK8_HUMAN Clusterin (Fragment) OS=Homo sapiens OX=9606 GN=CLU PE=1 SV=1;tr|H0YC35|H0YC35_HUMAN Clusterin (Fragment) OS=Homo sapiens OX=9606 GN=CLU PE=1 SV=1	26.8122	26.8122	31.0602	17	17	17	17	39	39	39	52.494	0	258.7	2239000000	44	449		39	10	P10909;H0YLK8;H0YC35;E7ERK6;E7ETB4;E5RJZ5;E5RG36;E5RGB0;E5RH61;H0YAS8	P10909;H0YLK8;H0YC35	True;True;True;True;True;True;True;True;True;True;True;True;True;True;True;True;True	17	17;11;10;8;7;5;4;4;4;4	17;11;10;8;7;5;4;4;4;4	17;11;10;8;7;5;4;4;4;4	17
Mannose-binding protein C	MBL2	sp|P11226|MBL2_HUMAN Mannose-binding protein C OS=Homo sapiens OX=9606 GN=MBL2 PE=1 SV=2	18.9959	18.9959	22.9028	2	2	2	2	15.3	15.3	15.3	26.143	0	12.118	7842000	2	248	248	15.3	1	P11226	P11226	True;True	2	2	2	2	2
Prolactin-inducible protein	PIP	sp|P12273|PIP_HUMAN Prolactin-inducible protein OS=Homo sapiens OX=9606 GN=PIP PE=1 SV=1	19.4468	19.4468	22.6167	1	1	1	1	7.5	7.5	7.5	16.572	0.016949	5.6855	6431500	1	146	146	7.5	1	P12273	P12273	TRUE	1	1	1	1	1
Low affinity immunoglobulin gamma Fc region receptor II-a;Low affinity immunoglobulin gamma Fc region receptor II-c	FCGR2A;FCGR2C	sp|P12318|FCG2A_HUMAN Low affinity immunoglobulin gamma Fc region receptor II-a OS=Homo sapiens OX=9606 GN=FCGR2A PE=1 SV=4;tr|V9GY83|V9GY83_HUMAN Low affinity immunoglobulin gamma Fc region receptor II-a (Fragment) OS=Homo sapiens OX=9606 GN=FCGR2A PE=1 S	22.9548	22.9548	26.2767	3	3	3	3	13.2	13.2	13.2	35	0	59.279	81297000	7	317		13.2	9	P12318;V9GY83;H0YGT0;P31995;V9GY55;F5GXY9;F5GX41;A0A087WXE5;P31994	P12318;V9GY83;H0YGT0;P31995	True;True;True	3	3;2;2;2;1;1;1;1;1	3;2;2;2;1;1;1;1;1	3;2;2;2;1;1;1;1;1	3
Complement component C6	C6	sp|P13671|CO6_HUMAN Complement component C6 OS=Homo sapiens OX=9606 GN=C6 PE=1 SV=3	14.9056	14.9056	20.4291	3	3	3	3	4.6	4.6	4.6	104.79	0	16.633	1411800	2	934	934	4.6	1	P13671	P13671	True;True;True	3	3	3	3	3
Delta-aminolevulinic acid dehydratase	ALAD	sp|P13716|HEM2_HUMAN Delta-aminolevulinic acid dehydratase OS=Homo sapiens OX=9606 GN=ALAD PE=1 SV=1	21.5505	21.5505	25.4574	1	1	1	1	4.8	4.8	4.8	36.294	0.070652	5.3331	46073000	1	330	330	4.8	1	P13716	P13716	TRUE	1	1	1	1	1
Junction plakoglobin	JUP	sp|P14923|PLAK_HUMAN Junction plakoglobin OS=Homo sapiens OX=9606 GN=JUP PE=1 SV=3	19.0326	19.0326	24.4589	4	4	4	4	9	9	9	81.744	0	28.535	23060000	4	745		9	5	P14923;C9JTX4;C9J826;C9JK18;C9JKY1	P14923	True;True;True;True	4	4;1;1;1;1	4;1;1;1;1	4;1;1;1;1	4
Immunoglobulin lambda-like polypeptide 1	IGLL1	sp|P15814|IGLL1_HUMAN Immunoglobulin lambda-like polypeptide 1 OS=Homo sapiens OX=9606 GN=IGLL1 PE=1 SV=1	18.9631	18.9631	22.4226	1	2	1	1	10.8	7	7	22.963	0	8.7834	5621600	2	213	213	10.8	1	P15814	P15814	False;True	1	2	1	1	2
Desmoplakin	DSP	sp|P15924|DESP_HUMAN Desmoplakin OS=Homo sapiens OX=9606 GN=DSP PE=1 SV=3	18.0088	18.0088	25.3663	6	6	6	6	1.9	1.9	1.9	331.77	0	34.868	43253000	7	2871	2871	1.9	1	P15924	P15924	True;True;True;True;True;True	6	6	6	6	6
Histone H1.5	HIST1H1B	sp|P16401|H15_HUMAN Histone H1.5 OS=Homo sapiens OX=9606 GN=HIST1H1B PE=1 SV=3	20.3869	20.3869	23.7088	1	4	1	1	18.6	7.1	7.1	22.58	0	7.7469	13711000	3	226	226	18.6	1	P16401	P16401	False;False;False;True	1	4	1	1	4
Histone H1.3	HIST1H1D	sp|P16402|H13_HUMAN Histone H1.3 OS=Homo sapiens OX=9606 GN=HIST1H1D PE=1 SV=2	20.9989	20.9989	24.5839	1	10	1	1	31.7	7.2	7.2	22.35	0	8.8373	25147000	3	221	221	31.7	1	P16402	P16402	False;False;False;False;False;False;False;True;False;False	1	10	1	1	10
Histone H1.2	HIST1H1C	sp|P16403|H12_HUMAN Histone H1.2 OS=Homo sapiens OX=9606 GN=HIST1H1C PE=1 SV=2	27.5419	27.5419	31.0013	4	14	14	4	46.9	46.9	16.9	21.364	0	112.31	2149500000	40	213		46.9	3	P16403;Q02539;P22492	P16403	True;True;True;True;True;True;True;True;True;True;True;True;True;True	14	14;5;4	14;5;4	4;0;0	14
Alpha-1-acid glycoprotein 2	ORM2	sp|P19652|A1AG2_HUMAN Alpha-1-acid glycoprotein 2 OS=Homo sapiens OX=9606 GN=ORM2 PE=1 SV=2	20.475	20.475	23.7969	1	3	1	1	13.4	5	5	23.602	0	7.2233	14574000	2	201	201	13.4	1	P19652	P19652	False;True;False	1	3	1	1	3
Inter-alpha-trypsin inhibitor heavy chain H2	ITIH2	tr|Q5T985|Q5T985_HUMAN Inter-alpha-trypsin inhibitor heavy chain H2 OS=Homo sapiens OX=9606 GN=ITIH2 PE=1 SV=1;sp|P19823|ITIH2_HUMAN Inter-alpha-trypsin inhibitor heavy chain H2 OS=Homo sapiens OX=9606 GN=ITIH2 PE=1 SV=2	19.731	19.731	25.2856	2	2	2	2	2.6	2.6	2.6	105.21	0	11.583	40901000	1	935		2.6	2	Q5T985;P19823	Q5T985;P19823	True;True	2	2;2	2;2	2;2	2
		P2_A0101	31.095	31.095	35.3429	20	29	29	20	66.3	66.3	37.8	40.845	0	323.31	43578000000	234	365	365	66.3	1	P2_A0101	P2_A0101	True;True;True;True;True;True;True;True;True;True;True;True;True;True;True;True;True;True;True;True;True;True;True;True;True;True;True;True;True	29	29	29	20	29
		P2_A2601	27.7938	27.7938	32.1157	10	21	10	10	60	28.8	28.8	41.061	0	323.31	4653600000	66	365	365	60	1	P2_A2601	P2_A2601	False;False;True;False;False;True;True;False;True;True;True;False;False;True;True;True;True;False;False;False;False	10	21	10	10	21
		P2_B3801	28.5703	28.5703	32.7403	11	26	14	11	70.7	39.2	35.1	40.416	0	253.5	7174600000	54	362	362	70.7	1	P2_B3801	P2_B3801	False;False;True;False;False;False;True;True;True;True;True;True;True;True;False;False;False;False;True;True;True;False;True;True;False;False	14	26	14	11	26
		P2_B4101	30.5023	30.5023	34.6722	13	28	24	13	71.5	58.6	37	40.539	0	323.31	27377000000	161	362	362	71.5	1	P2_B4101	P2_B4101	True;True;True;True;True;False;True;True;False;True;True;True;True;True;True;True;True;True;True;True;True;True;True;False;True;True;True;False	24	28	24	13	28
		P2_C1203	29.6831	29.6831	33.683	4	24	12	4	64.5	35.2	15.8	40.915	0	323.31	13791000000	66	366	366	64.5	1	P2_C1203	P2_C1203	True;True;True;False;False;False;False;False;False;True;False;True;True;True;True;False;False;False;True;False;True;True;False;True	12	24	12	4	24
		P2_C1701	26.093	26.093	30.2629	8	21	8	8	64.8	26.6	26.6	41.238	0	194.76	1288400000	36	372	372	64.8	1	P2_C1701	P2_C1701	False;False;True;False;False;False;False;False;False;False;False;True;True;True;True;True;False;True;False;False;True	8	21	8	8	21
Serine/threonine-protein kinase MAK	MAK	sp|P20794|MAK_HUMAN Serine/threonine-protein kinase MAK OS=Homo sapiens OX=9606 GN=MAK PE=1 SV=2	22.1793	22.1793	27.3888	1	1	1	1	1.4	1.4	1.4	70.58	0.08399	5.2975	175730000	1	623	623	1.4	1	P20794	P20794	TRUE	1	1	1	1	1
Small proline-rich protein 2F;Small proline-rich protein 2A;Small proline-rich protein 2B;Small proline-rich protein 2D;Small proline-rich protein 2E;Small proline-rich protein 2G	SPRR2F;SPRR2A;SPRR2B;SPRR2D;SPRR2E;SPRR2G	sp|Q96RM1|SPR2F_HUMAN Small proline-rich protein 2F OS=Homo sapiens OX=9606 GN=SPRR2F PE=3 SV=1;sp|P35326|SPR2A_HUMAN Small proline-rich protein 2A OS=Homo sapiens OX=9606 GN=SPRR2A PE=1 SV=1;sp|P35325|SPR2B_HUMAN Small proline-rich protein 2B OS=Homo sapi				1	1	1	1	12.5	12.5	12.5	7.8052	0	7.0102	0	2	72		12.5	6	Q96RM1;P35326;P35325;P22532;P22531;Q9BYE4	Q96RM1;P35326;P35325;P22532;P22531;Q9BYE4	TRUE	1	1;1;1;1;1;1	1;1;1;1;1;1	1;1;1;1;1;1	1
Cholesterol 7-alpha-monooxygenase	CYP7A1	sp|P22680|CP7A1_HUMAN Cholesterol 7-alpha-monooxygenase OS=Homo sapiens OX=9606 GN=CYP7A1 PE=1 SV=2	19.3074	19.3074	24.1147	1	1	1	1	4.8	4.8	4.8	57.66	0.059155	5.3823	18166000	0	504	504	4.8	1	P22680	P22680	TRUE	1	1	1	1	1
Ig heavy chain V-I region V35		sp|P23083|HV102_HUMAN Immunoglobulin heavy variable 1-2 OS=Homo sapiens OX=9606 GN=IGHV1-2 PE=1 SV=2	25.2774	25.2774	28.0847	3	3	3	3	23.9	23.9	23.9	13.085	0	33.782	284670000	5	117		23.9	2	P23083;A0A0C4DH31	P23083	True;True;True	3	3;1	3;1	3;1	3
Fibulin-1	FBLN1	sp|P23142|FBLN1_HUMAN Fibulin-1 OS=Homo sapiens OX=9606 GN=FBLN1 PE=1 SV=4;tr|B1AHM7|B1AHM7_HUMAN Fibulin-1 (Fragment) OS=Homo sapiens OX=9606 GN=FBLN1 PE=1 SV=1;tr|B1AHM9|B1AHM9_HUMAN Fibulin-1 (Fragment) OS=Homo sapiens OX=9606 GN=FBLN1 PE=1 SV=1	24.6502	24.6502	29.6044	3	10	10	3	22.2	22.2	8.5	77.213	0	279.18	816230000	26	703		22.2	6	P23142;B1AHM7;B1AHM9;B1AHN3;B1AHM6;B1AHM8	P23142;B1AHM7;B1AHM9	True;True;True;True;True;True;True;True;True;True	10	10;5;5;4;3;2	10;5;5;4;3;2	3;1;1;1;1;1	10
Zinc-alpha-2-glycoprotein	AZGP1	sp|P25311|ZA2G_HUMAN Zinc-alpha-2-glycoprotein OS=Homo sapiens OX=9606 GN=AZGP1 PE=1 SV=2;tr|C9JEV0|C9JEV0_HUMAN Zinc-alpha-2-glycoprotein OS=Homo sapiens OX=9606 GN=AZGP1 PE=1 SV=1	18.9793	18.9793	23.1492	3	3	3	3	14.4	14.4	14.4	34.258	0	17.142	9302600	2	298		14.4	3	P25311;C9JEV0;H7BZJ8	P25311;C9JEV0	True;True;True	3	3;2;1	3;2;1	3;2;1	3
60S ribosomal protein L13	RPL13	sp|P26373|RL13_HUMAN 60S ribosomal protein L13 OS=Homo sapiens OX=9606 GN=RPL13 PE=1 SV=4;tr|H3BUK8|H3BUK8_HUMAN 60S ribosomal protein L13 (Fragment) OS=Homo sapiens OX=9606 GN=RPL13 PE=1 SV=1;tr|J3KS98|J3KS98_HUMAN 60S ribosomal protein L13 (Fragment) OS=	20.2407	20.2407	23.5627	2	2	2	2	10	10	10	24.261	0	11.53	12390000	2	211		10	4	P26373;H3BUK8;J3KS98;J3QSB4	P26373;H3BUK8;J3KS98;J3QSB4	True;True	2	2;1;1;1	2;1;1;1	2;1;1;1	2
Serum paraoxonase/arylesterase 1	PON1	sp|P27169|PON1_HUMAN Serum paraoxonase/arylesterase 1 OS=Homo sapiens OX=9606 GN=PON1 PE=1 SV=3	16.7762	16.7762	20.683	1	1	1	1	3.1	3.1	3.1	39.731	0.052786	5.4352	1683500	1	355	355	3.1	1	P27169	P27169	TRUE	1	1	1	1	1
Properdin	CFP	sp|P27918|PROP_HUMAN Properdin OS=Homo sapiens OX=9606 GN=CFP PE=1 SV=2;tr|E9PAQ1|E9PAQ1_HUMAN Properdin OS=Homo sapiens OX=9606 GN=CFP PE=1 SV=1	25.0163	25.0163	29.2642	11	11	11	11	26.4	26.4	26.4	51.276	0	105.4	644760000	27	469		26.4	3	P27918;E9PAQ1;C9J7V5	P27918;E9PAQ1	True;True;True;True;True;True;True;True;True;True;True	11	11;10;3	11;10;3	11;10;3	11
Protein-lysine 6-oxidase	LOX	sp|P28300|LYOX_HUMAN Protein-lysine 6-oxidase OS=Homo sapiens OX=9606 GN=LOX PE=1 SV=2	22.1377	22.1377	26.1377	4	4	4	4	11.3	11.3	11.3	46.944	0	23.277	73831000	6	417	417	11.3	1	P28300	P28300	True;True;True;True	4	4	4	4	4
Granulins;Acrogranin;Paragranulin;Granulin-1;Granulin-2;Granulin-3;Granulin-4;Granulin-5;Granulin-6;Granulin-7	GRN	sp|P28799|GRN_HUMAN Progranulin OS=Homo sapiens OX=9606 GN=GRN PE=1 SV=2;tr|K7EMR1|K7EMR1_HUMAN Progranulin (Fragment) OS=Homo sapiens OX=9606 GN=GRN PE=1 SV=1;tr|K7EKL3|K7EKL3_HUMAN Progranulin (Fragment) OS=Homo sapiens OX=9606 GN=GRN PE=1 SV=1	20.1563	20.1563	24.6158	3	3	3	3	4	4	4	63.544	0	19.083	25710000	5	593		4	4	P28799;K7EMR1;K7EKL3;K7EQ05	P28799;K7EMR1;K7EKL3	True;True;True	3	3;2;2;1	3;2;2;1	3;2;2;1	3
Putative lipocalin 1-like protein 1;Lipocalin-1	LCN1P1;LCN1	sp|Q5VSP4|LC1L1_HUMAN Putative lipocalin 1-like protein 1 OS=Homo sapiens OX=9606 GN=LCN1P1 PE=5 SV=1;sp|P31025|LCN1_HUMAN Lipocalin-1 OS=Homo sapiens OX=9606 GN=LCN1 PE=1 SV=1	20.4168	20.4168	23.2241	1	1	1	1	6.8	6.8	6.8	17.918	0.090909	5.2762	9798500	1	162		6.8	2	Q5VSP4;P31025	Q5VSP4;P31025	TRUE	1	1;1	1;1	1;1	1
Protein S100-A7;Protein S100-A7A	S100A7;S100A7A	sp|P31151|S10A7_HUMAN Protein S100-A7 OS=Homo sapiens OX=9606 GN=S100A7 PE=1 SV=4;sp|Q86SG5|S1A7A_HUMAN Protein S100-A7A OS=Homo sapiens OX=9606 GN=S100A7A PE=1 SV=3	22.0144	22.0144	24.8218	2	2	2	2	24.8	24.8	24.8	11.471	0	39.848	29655000	3	101		24.8	2	P31151;Q86SG5	P31151;Q86SG5	True;True	2	2;1	2;1	2;1	2
Protein S100-A11;Protein S100-A11, N-terminally processed	S100A11	sp|P31949|S10AB_HUMAN Protein S100-A11 OS=Homo sapiens OX=9606 GN=S100A11 PE=1 SV=2	21.6977	21.6977	24.0196	1	1	1	1	8.6	8.6	8.6	11.74	0.051672	5.4776	17007000	0	105	105	8.6	1	P31949	P31949	TRUE	1	1	1	1	1
Ribonuclease 4	RNASE4	sp|P34096|RNAS4_HUMAN Ribonuclease 4 OS=Homo sapiens OX=9606 GN=RNASE4 PE=1 SV=3	20.1621	20.1621	23.1622	1	1	1	1	8.8	8.8	8.8	16.84	0.011111	5.917	9386700	1	147	147	8.8	1	P34096	P34096	TRUE	1	1	1	1	1
Myosin-10	MYH10	sp|P35580|MYH10_HUMAN Myosin-10 OS=Homo sapiens OX=9606 GN=MYH10 PE=1 SV=3	14.7208	14.7208	21.3647	1	1	1	1	1.4	1.4	1.4	229	0.09204	5.2733	2700300	0	1976	1976	1.4	1	P35580	P35580	TRUE	1	1	1	1	1
40S ribosomal protein S19	RPS19	sp|P39019|RS19_HUMAN 40S ribosomal protein S19 OS=Homo sapiens OX=9606 GN=RPS19 PE=1 SV=2;tr|A0A075B6E2|A0A075B6E2_HUMAN 40S ribosomal protein S19 OS=Homo sapiens OX=9606 GN=RPS19 PE=1 SV=1;tr|M0R2L9|M0R2L9_HUMAN 40S ribosomal protein S19 (Fragment) OS=Hom	22.0964	22.0964	25.4183	4	4	4	4	29.7	29.7	29.7	16.06	0	22.625	44840000	2	145		29.7	6	P39019;A0A075B6E2;M0R2L9;M0QXK4;M0QYF7;M0R140	P39019;A0A075B6E2;M0R2L9;M0QXK4;M0QYF7;M0R140	True;True;True;True	4	4;2;2;2;2;2	4;2;2;2;2;2	4;2;2;2;2;2	4
Prostaglandin-H2 D-isomerase	PTGDS	sp|P41222|PTGDS_HUMAN Prostaglandin-H2 D-isomerase OS=Homo sapiens OX=9606 GN=PTGDS PE=1 SV=1;tr|H0Y5A1|H0Y5A1_HUMAN Prostaglandin-H2 D-isomerase (Fragment) OS=Homo sapiens OX=9606 GN=PTGDS PE=1 SV=2;tr|Q5SQ11|Q5SQ11_HUMAN Prostaglandin-H2 D-isomerase (Fra	21.9953	21.9953	24.9953	2	2	2	2	17.4	17.4	17.4	21.029	0	24.441	33446000	5	190		17.4	3	P41222;H0Y5A1;Q5SQ11	P41222;H0Y5A1;Q5SQ11	True;True	2	2;1;1	2;1;1	2;1;1	2
Tyrosine-protein kinase Tec	TEC	sp|P42680|TEC_HUMAN Tyrosine-protein kinase Tec OS=Homo sapiens OX=9606 GN=TEC PE=1 SV=2	16.9959	16.9959	22.2054	1	1	1	1	1.1	1.1	1.1	73.58	0.053412	5.4485	4836000	1	631	631	1.1	1	P42680	P42680	TRUE	1	1	1	1	1
60S ribosomal protein L35	RPL35	sp|P42766|RL35_HUMAN 60S ribosomal protein L35 OS=Homo sapiens OX=9606 GN=RPL35 PE=1 SV=2;tr|F2Z388|F2Z388_HUMAN 60S ribosomal protein L35 OS=Homo sapiens OX=9606 GN=RPL35 PE=1 SV=1	22.4352	22.4352	24.4352	2	2	2	2	15.4	15.4	15.4	14.551	0	14.326	22685000	3	123		15.4	2	P42766;F2Z388	P42766;F2Z388	True;True	2	2;1	2;1	2;1	2
Stromal cell-derived factor 1;SDF-1-beta(3-72);SDF-1-alpha(3-67)	CXCL12	sp|P48061|SDF1_HUMAN Stromal cell-derived factor 1 OS=Homo sapiens OX=9606 GN=CXCL12 PE=1 SV=1	24.5279	24.5279	26.8498	3	3	3	3	34.4	34.4	34.4	10.666	0	54.299	120950000	9	93	93	34.4	1	P48061	P48061	True;True;True	3	3	3	3	3
Apolipoprotein C-IV	APOC4	sp|P55056|APOC4_HUMAN Apolipoprotein C-IV OS=Homo sapiens OX=9606 GN=APOC4 PE=1 SV=1	21.6774	21.6774	24.2623	1	2	1	1	16.5	9.4	9.4	14.553	0	7.3984	20123000	1	127	127	16.5	1	P55056	P55056	False;True	1	2	1	1	2
C-C motif chemokine 18;CCL18(1-68);CCL18(3-69);CCL18(4-69)	CCL18	sp|P55774|CCL18_HUMAN C-C motif chemokine 18 OS=Homo sapiens OX=9606 GN=CCL18 PE=1 SV=1	24.1045	24.1045	26.1045	2	2	2	2	41.6	41.6	41.6	9.8487	0	19.264	72150000	3	89	89	41.6	1	P55774	P55774	True;True	2	2	2	2	2
Inhibin beta E chain	INHBE	sp|P58166|INHBE_HUMAN Inhibin beta E chain OS=Homo sapiens OX=9606 GN=INHBE PE=1 SV=1	19.2091	19.2091	23.2966	1	1	1	1	4.6	4.6	4.6	38.561	0.014337	5.803	10303000	1	350	350	4.6	1	P58166	P58166	TRUE	1	1	1	1	1
Neutrophil defensin 3;HP 3-56;Neutrophil defensin 2;Neutrophil defensin 1;HP 1-56;Neutrophil defensin 2	DEFA3;DEFA1	sp|P59666|DEF3_HUMAN Neutrophil defensin 3 OS=Homo sapiens OX=9606 GN=DEFA3 PE=1 SV=1;sp|P59665|DEF1_HUMAN Neutrophil defensin 1 OS=Homo sapiens OX=9606 GN=DEFA1 PE=1 SV=1	23.4768	23.4768	25.4768	2	2	2	2	19.1	19.1	19.1	10.245	0	11.608	46697000	3	94		19.1	2	P59666;P59665	P59666;P59665	True;True	2	2;2	2;2	2;2	2
Actin, cytoplasmic 2;Actin, cytoplasmic 2, N-terminally processed;Actin, cytoplasmic 1;Actin, cytoplasmic 1, N-terminally processed;Actin, alpha cardiac muscle 1;Actin, alpha skeletal muscle;Actin, aortic smooth muscle;Actin, gamma-enteric smooth muscle	ACTG1;ACTB;ACTC1;ACTA1;ACTA2;ACTG2	sp|P63261|ACTG_HUMAN Actin, cytoplasmic 2 OS=Homo sapiens OX=9606 GN=ACTG1 PE=1 SV=1;sp|P60709|ACTB_HUMAN Actin, cytoplasmic 1 OS=Homo sapiens OX=9606 GN=ACTB PE=1 SV=1;tr|A0A2R8Y793|A0A2R8Y793_HUMAN Actin, cytoplasmic 1 (Fragment) OS=Homo sapiens OX=9606	22.0295	22.0295	26.3514	7	7	7	7	22.1	22.1	22.1	41.792	0	48.709	85616000	7	375		22.1	34	P63261;P60709;A0A2R8Y793;P68032;P68133;P62736;P63267;A6NL76;I3L4N8;I3L1U9;I3L3I0;A5A3E0;G5E9R0;E7EVS6;I3L3R2;J3KT65;A0A2R8YGF8;Q6S8J3;K7EM38;F6QUT6;A0A2R8YFE2;F8WCH0;C9JFL5;B8ZZJ2;C9JZR7;Q562R1;A0A2R8YEA7;P0CG38;F6UVQ4;C9JTX5;C9JUM1;F8WB63;P0CG39;Q9BYX7	P63261;P60709;A0A2R8Y793;P68032;P68133;P62736;P63267;A6NL76;I3L4N8;I3L1U9;I3L3I0	True;True;True;True;True;True;True	7	7;7;5;5;5;5;5;4;4;4;4;3;3;3;3;3;3;3;3;2;2;2;2;2;2;2;2;2;2;2;2;2;1;1	7;7;5;5;5;5;5;4;4;4;4;3;3;3;3;3;3;3;3;2;2;2;2;2;2;2;2;2;2;2;2;2;1;1	7;7;5;5;5;5;5;4;4;4;4;3;3;3;3;3;3;3;3;2;2;2;2;2;2;2;2;2;2;2;2;2;1;1	7
Somatostatin;Somatostatin-28;Somatostatin-14	SST	sp|P61278|SMS_HUMAN Somatostatin OS=Homo sapiens OX=9606 GN=SST PE=1 SV=1	21.5307	21.5307	23.1157	1	1	1	1	11.2	11.2	11.2	12.735	0	8.5558	9089100	2	116	116	11.2	1	P61278	P61278	TRUE	1	1	1	1	1
Lysozyme C	LYZ	sp|P61626|LYSC_HUMAN Lysozyme C OS=Homo sapiens OX=9606 GN=LYZ PE=1 SV=1	24.8525	24.8525	28.0224	7	7	7	7	53.4	53.4	53.4	16.537	0	61.788	272640000	12	148		53.4	3	P61626;F8VV32;A0A0B4J259	P61626	True;True;True;True;True;True;True	7	7;3;3	7;3;3	7;3;3	7
Beta-2-microglobulin;Beta-2-microglobulin form pI 5.3	B2M	sp|P61769|B2MG_HUMAN Beta-2-microglobulin OS=Homo sapiens OX=9606 GN=B2M PE=1 SV=1;tr|H0YLF3|H0YLF3_HUMAN Beta-2-microglobulin (Fragment) OS=Homo sapiens OX=9606 GN=B2M PE=1 SV=1;tr|F5H6I0|F5H6I0_HUMAN Beta-2-microglobulin OS=Homo sapiens OX=9606 GN=B2M PE	33.0004	33.0004	35.5854	8	8	8	8	67.2	67.2	67.2	13.714	0	314.37	51555000000	55	119		67.2	3	P61769;H0YLF3;F5H6I0	P61769;H0YLF3;F5H6I0	True;True;True;True;True;True;True;True	8	8;6;6	8;6;6	8;6;6	8
40S ribosomal protein S18	RPS18	sp|P62269|RS18_HUMAN 40S ribosomal protein S18 OS=Homo sapiens OX=9606 GN=RPS18 PE=1 SV=3	21.0911	21.0911	24.2611	3	3	3	3	20.4	20.4	20.4	17.718	0	17.682	20105000	4	152		20.4	4	P62269;A0A0G2JQH2;Q5GGW2;J3JS69	P62269	True;True;True	3	3;1;1;1	3;1;1;1	3;1;1;1	3
Small nuclear ribonucleoprotein Sm D1	SNRPD1	sp|P62314|SMD1_HUMAN Small nuclear ribonucleoprotein Sm D1 OS=Homo sapiens OX=9606 GN=SNRPD1 PE=1 SV=1;tr|J3QLR7|J3QLR7_HUMAN Small nuclear ribonucleoprotein Sm D1 OS=Homo sapiens OX=9606 GN=SNRPD1 PE=1 SV=1;tr|J3QLI9|J3QLI9_HUMAN Small nuclear ribonucleop	23.1958	23.1958	25.1958	2	2	2	2	20.2	20.2	20.2	13.281	0	12.983	38432000	4	119		20.2	3	P62314;J3QLR7;J3QLI9	P62314;J3QLR7;J3QLI9	True;True	2	2;1;1	2;1;1	2;1;1	2
Small nuclear ribonucleoprotein Sm D3	SNRPD3	sp|P62318|SMD3_HUMAN Small nuclear ribonucleoprotein Sm D3 OS=Homo sapiens OX=9606 GN=SNRPD3 PE=1 SV=1;tr|H3BT13|H3BT13_HUMAN Small nuclear ribonucleoprotein Sm D3 OS=Homo sapiens OX=9606 GN=SNRPD3 PE=1 SV=1	22.4928	22.4928	25.0778	2	2	2	2	24.6	24.6	24.6	13.916	0	40.293	35413000	3	126		24.6	2	P62318;H3BT13	P62318;H3BT13	True;True	2	2;1	2;1	2;1	2
40S ribosomal protein S4, X isoform	RPS4X	sp|P62701|RS4X_HUMAN 40S ribosomal protein S4, X isoform OS=Homo sapiens OX=9606 GN=RPS4X PE=1 SV=2				1	1	1	1	3.4	3.4	3.4	29.597	0.032154	5.569	0	1	263	263	3.4	1	P62701	P62701	TRUE	1	1	1	1	1
Histone H4	HIST1H4A	sp|P62805|H4_HUMAN Histone H4 OS=Homo sapiens OX=9606 GN=HIST1H4A PE=1 SV=2	28.0657	28.0657	30.6507	9	9	9	9	57.3	57.3	57.3	11.367	0	70.165	1685700000	31	103	103	57.3	1	P62805	P62805	True;True;True;True;True;True;True;True;True	9	9	9	9	9
40S ribosomal protein S25	RPS25	sp|P62851|RS25_HUMAN 40S ribosomal protein S25 OS=Homo sapiens OX=9606 GN=RPS25 PE=1 SV=1	21.8907	21.8907	24.2126	1	1	1	1	7.2	7.2	7.2	13.742	0	7.112	19441000	3	125	125	7.2	1	P62851	P62851	TRUE	1	1	1	1	1
40S ribosomal protein S26	RPS26	sp|P62854|RS26_HUMAN 40S ribosomal protein S26 OS=Homo sapiens OX=9606 GN=RPS26 PE=1 SV=3	18.2522	18.2522	20.5741	1	1	1	1	13	13	13	13.015	0.054054	5.4584	1561100	1	115	115	13	1	P62854	P62854	TRUE	1	1	1	1	1
Nuclease-sensitive element-binding protein 1;Y-box-binding protein 3	YBX1;YBX3	sp|P67809|YBOX1_HUMAN Nuclease-sensitive element-binding protein 1 OS=Homo sapiens OX=9606 GN=YBX1 PE=1 SV=3;tr|H0Y449|H0Y449_HUMAN Nuclease-sensitive element-binding protein 1 (Fragment) OS=Homo sapiens OX=9606 GN=YBX1 PE=1 SV=1;sp|P16989|YBOX3_HUMAN Y-bo	21.5926	21.5926	25.1776	4	4	4	4	25	25	25	35.924	0	35.431	37949000	7	324		25	6	P67809;H0Y449;P16989;A0A0D9SEI8;C9J5V9;Q9Y2T7	P67809;H0Y449;P16989	True;True;True;True	4	4;3;2;1;1;1	4;3;2;1;1;1	4;3;2;1;1;1	4
Hemoglobin subunit beta;LVV-hemorphin-7;Spinorphin;Hemoglobin subunit delta	HBB;HBD	sp|P68871|HBB_HUMAN Hemoglobin subunit beta OS=Homo sapiens OX=9606 GN=HBB PE=1 SV=2;tr|A0A2R8Y7R2|A0A2R8Y7R2_HUMAN Hemoglobin subunit beta OS=Homo sapiens OX=9606 GN=HBB PE=1 SV=1;tr|F8W6P5|F8W6P5_HUMAN Hemoglobin subunit beta (Fragment) OS=Homo sapiens O	25.4884	25.4884	28.9478	12	12	12	12	94.6	94.6	94.6	15.998	0	127.8	517790000	31	147		94.6	15	P68871;A0A2R8Y7R2;F8W6P5;P02042;E9PFT6;E9PEW8;A0A0J9YWK4;CON__Q3SX09;C9JRG0;A8MUF7;CON__P02070;A0A2R8Y7X9;P69892;P69891;P02100	P68871;A0A2R8Y7R2;F8W6P5;P02042	True;True;True;True;True;True;True;True;True;True;True;True	12	12;8;6;6;4;3;2;2;1;1;1;1;1;1;1	12;8;6;6;4;3;2;2;1;1;1;1;1;1;1	12;8;6;6;4;3;2;2;1;1;1;1;1;1;1	12
Hemoglobin subunit alpha	HBA1	sp|P69905|HBA_HUMAN Hemoglobin subunit alpha OS=Homo sapiens OX=9606 GN=HBA1 PE=1 SV=2;tr|A0A2R8Y7C0|A0A2R8Y7C0_HUMAN Hemoglobin subunit alpha (Fragment) OS=Homo sapiens OX=9606 GN=HBA2 PE=1 SV=1	26.3032	26.3032	29.3032	2	5	5	2	56.3	56.3	18.3	15.257	0	55.467	662450000	18	142		56.3	2	P69905;A0A2R8Y7C0	P69905;A0A2R8Y7C0	True;True;True;True;True	5	5;4	5;4	2;1	5
Ig lambda chain V-III region LOI		sp|P80748|LV321_HUMAN Immunoglobulin lambda variable 3-21 OS=Homo sapiens OX=9606 GN=IGLV3-21 PE=1 SV=2	26.4621	26.4621	28.4621	1	3	1	1	48.7	25.6	25.6	12.446	0	65.881	369780000	7	117	117	48.7	1	P80748	P80748	False;False;True	1	3	1	1	3
Dermcidin;Survival-promoting peptide;DCD-1	DCD	sp|P81605|DCD_HUMAN Dermcidin OS=Homo sapiens OX=9606 GN=DCD PE=1 SV=2	24.7076	24.7076	27.0295	2	2	2	2	22.7	22.7	22.7	11.284	0	11.861	136990000	2	110	110	22.7	1	P81605	P81605	True;True	2	2	2	2	2
Desmoglein-1	DSG1	sp|Q02413|DSG1_HUMAN Desmoglein-1 OS=Homo sapiens OX=9606 GN=DSG1 PE=1 SV=2	19.13	19.13	24.3395	4	4	4	4	5.8	5.8	5.8	113.75	0	29.771	21228000	3	1049	1049	5.8	1	Q02413	Q02413	True;True;True;True	4	4	4	4	4
Complement factor H-related protein 1	CFHR1	sp|Q03591|FHR1_HUMAN Complement factor H-related protein 1 OS=Homo sapiens OX=9606 GN=CFHR1 PE=1 SV=2;tr|B1AKG0|B1AKG0_HUMAN Complement factor H-related protein 1 OS=Homo sapiens OX=9606 GN=CFHR1 PE=1 SV=1	23.5344	23.5344	27.4413	4	6	6	4	20	20	13.3	37.65	0	142.76	182240000	12	330		20	3	Q03591;B1AKG0;Q9BXR6	Q03591;B1AKG0	True;True;True;True;True;True	6	6;5;1	6;5;1	4;3;1	6
Regenerating islet-derived protein 3-alpha;Regenerating islet-derived protein 3-alpha 16.5 kDa form;Regenerating islet-derived protein 3-alpha 15 kDa form	REG3A	sp|Q06141|REG3A_HUMAN Regenerating islet-derived protein 3-alpha OS=Homo sapiens OX=9606 GN=REG3A PE=1 SV=1	26.1133	26.1133	28.4352	1	1	1	1	8	8	8	19.395	0.003876	6.3672	362960000	1	175	175	8	1	Q06141	Q06141	TRUE	1	1	1	1	1
Glutamine--fructose-6-phosphate aminotransferase [isomerizing] 1	GFPT1	sp|Q06210|GFPT1_HUMAN Glutamine--fructose-6-phosphate aminotransferase [isomerizing] 1 OS=Homo sapiens OX=9606 GN=GFPT1 PE=1 SV=3	19.369	19.369	24.7953	1	1	1	1	2.4	2.4	2.4	78.806	0.031847	5.5611	29116000	1	699	699	2.4	1	Q06210	Q06210	TRUE	1	1	1	1	1
Desmocollin-1	DSC1	sp|Q08554|DSC1_HUMAN Desmocollin-1 OS=Homo sapiens OX=9606 GN=DSC1 PE=1 SV=2	19.1159	19.1159	24.5753	2	2	2	2	2.8	2.8	2.8	99.986	0	10.973	24998000	1	894	894	2.8	1	Q08554	Q08554	True;True	2	2	2	2	2
Neuroblast differentiation-associated protein AHNAK	AHNAK	sp|Q09666|AHNK_HUMAN Neuroblast differentiation-associated protein AHNAK OS=Homo sapiens OX=9606 GN=AHNAK PE=1 SV=2	19.229	19.229	27.7874	12	12	12	12	8	8	8	629.09	0	84.906	231660000	22	5890	5890	8	1	Q09666	Q09666	True;True;True;True;True;True;True;True;True;True;True;True	12	12	12	12	12
Plakophilin-1	PKP1	sp|Q13835|PKP1_HUMAN Plakophilin-1 OS=Homo sapiens OX=9606 GN=PKP1 PE=1 SV=2				1	1	1	1	2	2	2	82.86	0	8.0875	0	1	747	747	2	1	Q13835	Q13835	TRUE	1	1	1	1	1
SPARC-like protein 1	SPARCL1	sp|Q14515|SPRL1_HUMAN SPARC-like protein 1 OS=Homo sapiens OX=9606 GN=SPARCL1 PE=1 SV=2	19.7354	19.7354	24.7798	4	4	4	4	8.4	8.4	8.4	75.207	0	26.126	28804000	3	664	664	8.4	1	Q14515	Q14515	True;True;True;True	4	4	4	4	4
Inter-alpha-trypsin inhibitor heavy chain H4;70 kDa inter-alpha-trypsin inhibitor heavy chain H4;35 kDa inter-alpha-trypsin inhibitor heavy chain H4	ITIH4	sp|Q14624|ITIH4_HUMAN Inter-alpha-trypsin inhibitor heavy chain H4 OS=Homo sapiens OX=9606 GN=ITIH4 PE=1 SV=4	22.3021	22.3021	27.7615	1	9	1	1	11	1.2	1.2	103.36	0.0039062	6.4114	227530000	4	930	930	11	1	Q14624	Q14624	False;False;True;False;False;False;False;False;False	1	9	1	1	9
Cyclin-G2	CCNG2	sp|Q16589|CCNG2_HUMAN Cyclin-G2 OS=Homo sapiens OX=9606 GN=CCNG2 PE=2 SV=1	13.8523	13.8523	17.6597	1	1	1	1	3.8	3.8	3.8	38.865	0.089588	5.2664	207060	0	344	344	3.8	1	Q16589	Q16589	TRUE	1	1	1	1	1
Extracellular matrix protein 1	ECM1	sp|Q16610|ECM1_HUMAN Extracellular matrix protein 1 OS=Homo sapiens OX=9606 GN=ECM1 PE=1 SV=2				1	1	1	1	2.4	2.4	2.4	60.673	0.0074906	5.9603	0	1	540	540	2.4	1	Q16610	Q16610	TRUE	1	1	1	1	1
	HLA-G2.2	tr|Q31611|Q31611_HUMAN B2 microglobulin OS=Homo sapiens OX=9606 GN=HLA-G PE=1 SV=1	22.082	22.082	25.8894	5	6	5	5	38.6	33.3	33.3	27.68	0	58.674	62156000	5	246	246	38.6	1	Q31611	Q31611	True;True;True;True;False;True	5	6	5	5	6
SH3 domain-containing kinase-binding protein 1	SH3KBP1	tr|Q5VSN0|Q5VSN0_HUMAN SH3 domain-containing kinase-binding protein 1 OS=Homo sapiens OX=9606 GN=SH3KBP1 PE=1 SV=1;tr|Q5JPT2|Q5JPT2_HUMAN SH3 domain-containing kinase-binding protein 1 (Fragment) OS=Homo sapiens OX=9606 GN=SH3KBP1 PE=1 SV=1;sp|Q96B97|SH3K1				1	1	1	1	1.4	1.4	1.4	61.433	0.020134	5.6494	0	1	553		1.4	3	Q5VSN0;Q5JPT2;Q96B97	Q5VSN0;Q5JPT2;Q96B97	TRUE	1	1;1;1	1;1;1	1;1;1	1
Protein dopey-1	DOPEY1	tr|Q5TA12|Q5TA12_HUMAN Protein dopey-1 OS=Homo sapiens OX=9606 GN=DOP1A PE=1 SV=2;sp|Q5JWR5|DOP1_HUMAN Protein dopey-1 OS=Homo sapiens OX=9606 GN=DOP1A PE=2 SV=1				1	1	1	1	0.4	0.4	0.4	278.79	0.070845	5.3356	0	1	2476		0.4	2	Q5TA12;Q5JWR5	Q5TA12;Q5JWR5	TRUE	1	1;1	1;1	1;1	1
F-box only protein 47	FBXO47	sp|Q5MNV8|FBX47_HUMAN F-box only protein 47 OS=Homo sapiens OX=9606 GN=FBXO47 PE=2 SV=2				1	1	1	1	3.1	3.1	3.1	51.967	0.026756	5.63	0	1	452	452	3.1	1	Q5MNV8	Q5MNV8	TRUE	1	1	1	1	1
Keratinocyte proline-rich protein	KPRP	sp|Q5T749|KPRP_HUMAN Keratinocyte proline-rich protein OS=Homo sapiens OX=9606 GN=KPRP PE=1 SV=1	20.4533	20.4533	24.5408	2	2	2	2	6	6	6	64.135	0	14.134	24407000	3	579	579	6	1	Q5T749	Q5T749	True;True	2	2	2	2	2
Carboxypeptidase Z	CPZ	sp|Q66K79|CBPZ_HUMAN Carboxypeptidase Z OS=Homo sapiens OX=9606 GN=CPZ PE=1 SV=2				1	1	1	1	3.5	3.5	3.5	73.655	0	7.1866	0	1	652	652	3.5	1	Q66K79	Q66K79	TRUE	1	1	1	1	1
Very large A-kinase anchor protein	CRYBG3	sp|Q68DQ2|CRBG3_HUMAN Very large A-kinase anchor protein OS=Homo sapiens OX=9606 GN=CRYBG3 PE=1 SV=3	16.8724	16.8724	24.2033	1	1	1	1	0.5	0.5	0.5	330.63	0.04375	5.5158	19316000	1	2970	2970	0.5	1	Q68DQ2	Q68DQ2	TRUE	1	1	1	1	1
Uncharacterized protein C16orf46	C16orf46	sp|Q6P387|CP046_HUMAN Uncharacterized protein C16orf46 OS=Homo sapiens OX=9606 GN=C16orf46 PE=2 SV=2	20.7099	20.7099	25.1023	1	1	1	1	2.5	2.5	2.5	43.417	0.071823	5.3475	36020000	1	395	395	2.5	1	Q6P387	Q6P387	TRUE	1	1	1	1	1
Serine/threonine-protein kinase ULK3	ULK3	sp|Q6PHR2|ULK3_HUMAN Serine/threonine-protein kinase ULK3 OS=Homo sapiens OX=9606 GN=ULK3 PE=1 SV=2	25.5447	25.5447	30.0683	1	1	1	1	1.5	1.5	1.5	53.444	0.017301	5.7125	1125800000	3	472	472	1.5	1	Q6PHR2	Q6PHR2	TRUE	1	1	1	1	1
ATPase family AAA domain-containing protein 2	ATAD2	sp|Q6PL18|ATAD2_HUMAN ATPase family AAA domain-containing protein 2 OS=Homo sapiens OX=9606 GN=ATAD2 PE=1 SV=1	19.9699	19.9699	26.0143	1	1	1	1	1.2	1.2	1.2	158.55	0.052326	5.4217	67777000	1	1390	1390	1.2	1	Q6PL18	Q6PL18	TRUE	1	1	1	1	1
Suprabasin	SBSN	sp|Q6UWP8|SBSN_HUMAN Suprabasin OS=Homo sapiens OX=9606 GN=SBSN PE=1 SV=2	19.2083	19.2083	24.2083	2	2	2	2	15.3	15.3	15.3	60.54	0	11.552	19383000	2	590	590	15.3	1	Q6UWP8	Q6UWP8	True;True	2	2	2	2	2
Bis(5-adenosyl)-triphosphatase ENPP4;Ectonucleotide pyrophosphatase/phosphodiesterase family member 7	ENPP4;ENPP7	sp|Q9Y6X5|ENPP4_HUMAN Bis(5-adenosyl)-triphosphatase ENPP4 OS=Homo sapiens OX=9606 GN=ENPP4 PE=1 SV=3;sp|Q6UWV6|ENPP7_HUMAN Ectonucleotide pyrophosphatase/phosphodiesterase family member 7 OS=Homo sapiens OX=9606 GN=ENPP7 PE=1 SV=3	16.6958	16.6958	20.7832	1	1	1	1	2.2	2.2	2.2	51.641	0.089806	5.2666	1804600	0	453		2.2	2	Q9Y6X5;Q6UWV6	Q9Y6X5;Q6UWV6	TRUE	1	1;1	1;1	1;1	1
SPOC domain-containing protein 1	SPOCD1	sp|Q6ZMY3|SPOC1_HUMAN SPOC domain-containing protein 1 OS=Homo sapiens OX=9606 GN=SPOCD1 PE=2 SV=1	19.9625	19.9625	25.635	1	1	1	1	0.6	0.6	0.6	130.03	0.088312	5.2932	52107000	0	1216	1216	0.6	1	Q6ZMY3	Q6ZMY3	TRUE	1	1	1	1	1
WD repeat-containing protein 88	WDR88	sp|Q6ZMY6|WDR88_HUMAN WD repeat-containing protein 88 OS=Homo sapiens OX=9606 GN=WDR88 PE=2 SV=2	24.9135	24.9135	29.8204	2	2	2	2	5.9	5.9	5.9	52.62	0	10.717	948050000	2	472	472	5.9	1	Q6ZMY6	Q6ZMY6	True;True	2	2	2	2	2
Xin actin-binding repeat-containing protein 1	XIRP1	sp|Q702N8|XIRP1_HUMAN Xin actin-binding repeat-containing protein 1 OS=Homo sapiens OX=9606 GN=XIRP1 PE=1 SV=1	20.0122	20.0122	26.582	1	1	1	1	0.4	0.4	0.4	198.56	0.032362	5.5712	100460000	1	1843	1843	0.4	1	Q702N8	Q702N8	TRUE	1	1	1	1	1
Putative chemokine-related protein FP248	FP248	sp|Q71RG6|YH006_HUMAN Putative chemokine-related protein FP248 OS=Homo sapiens OX=9606 GN=FP248 PE=5 SV=1	24.0781	24.0781	26.4001	1	1	1	1	13.9	13.9	13.9	21.376	0.052941	5.4356	88554000	1	208	208	13.9	1	Q71RG6	Q71RG6	TRUE	1	1	1	1	1
Speriolin	SPATC1	sp|Q76KD6|SPERI_HUMAN Speriolin OS=Homo sapiens OX=9606 GN=SPATC1 PE=2 SV=2	20.5196	20.5196	24.5196	1	1	1	1	1.9	1.9	1.9	62.398	0.014085	5.7836	24052000	1	591	591	1.9	1	Q76KD6	Q76KD6	TRUE	1	1	1	1	1
Protein RD3	RD3	sp|Q7Z3Z2|RD3_HUMAN Protein RD3 OS=Homo sapiens OX=9606 GN=RD3 PE=1 SV=1				1	1	1	1	3.6	3.6	3.6	22.704	0.03481	5.5538	0	1	195	195	3.6	1	Q7Z3Z2	Q7Z3Z2	TRUE	1	1	1	1	1
	HOMER1	tr|Q86YM6|Q86YM6_HUMAN HOMER1F OS=Homo sapiens OX=9606 GN=HOMER1 PE=1 SV=1	22.4482	22.4482	26.0331	1	1	1	1	9.4	9.4	9.4	20.819	0.029801	5.6235	68667000	1	180	180	9.4	1	Q86YM6	Q86YM6	TRUE	1	1	1	1	1
Protein AHNAK2	AHNAK2	sp|Q8IVF2|AHNK2_HUMAN Protein AHNAK2 OS=Homo sapiens OX=9606 GN=AHNAK2 PE=1 SV=2	16.4969	16.4969	24.7353	1	1	1	1	0.1	0.1	0.1	616.62	0.092784	5.2861	27930000	1	5795	5795	0.1	1	Q8IVF2	Q8IVF2	TRUE	1	1	1	1	1
E3 ubiquitin-protein ligase UBR2	UBR2	sp|Q8IWV8|UBR2_HUMAN E3 ubiquitin-protein ligase UBR2 OS=Homo sapiens OX=9606 GN=UBR2 PE=1 SV=1	22.1727	22.1727	28.565	1	1	1	1	0.9	0.9	0.9	200.54	0.091603	5.2797	397110000	1	1755	1755	0.9	1	Q8IWV8	Q8IWV8	TRUE	1	1	1	1	1
Spindle and kinetochore-associated protein 3	SKA3	sp|Q8IX90|SKA3_HUMAN Spindle and kinetochore-associated protein 3 OS=Homo sapiens OX=9606 GN=SKA3 PE=1 SV=2	20.3059	20.3059	24.7653	1	1	1	1	6.6	6.6	6.6	46.359	0.091133	5.2706	28516000	0	412	412	6.6	1	Q8IX90	Q8IX90	TRUE	1	1	1	1	1
Integrator complex subunit 1	INTS1	sp|Q8N201|INT1_HUMAN Integrator complex subunit 1 OS=Homo sapiens OX=9606 GN=INTS1 PE=1 SV=2	16.444	16.444	23.2253	1	1	1	1	0.9	0.9	0.9	244.29	0.091837	5.2831	9806500	0	2190	2190	0.9	1	Q8N201	Q8N201	TRUE	1	1	1	1	1
E3 SUMO-protein ligase PIAS4	PIAS4	sp|Q8N2W9|PIAS4_HUMAN E3 SUMO-protein ligase PIAS4 OS=Homo sapiens OX=9606 GN=PIAS4 PE=1 SV=1	20.7095	20.7095	25.2331	1	1	1	1	3.1	3.1	3.1	56.503	0.054755	5.4101	39438000	0	510	510	3.1	1	Q8N2W9	Q8N2W9	TRUE	1	1	1	1	1
Secreted frizzled-related protein 1	SFRP1	sp|Q8N474|SFRP1_HUMAN Secreted frizzled-related protein 1 OS=Homo sapiens OX=9606 GN=SFRP1 PE=1 SV=1;tr|Q6ZSL4|Q6ZSL4_HUMAN Secreted frizzled-related protein 1, isoform CRA_a OS=Homo sapiens OX=9606 GN=SFRP1 PE=1 SV=1	20.7546	20.7546	24.214	2	2	2	2	5.7	5.7	5.7	35.385	0	11.12	19460000	2	314		5.7	2	Q8N474;Q6ZSL4	Q8N474;Q6ZSL4	True;True	2	2;1	2;1	2;1	2
Uncharacterized protein KIAA1958	KIAA1958	sp|Q8N8K9|K1958_HUMAN Uncharacterized protein KIAA1958 OS=Homo sapiens OX=9606 GN=KIAA1958 PE=1 SV=1	20.3959	20.3959	25.1508	1	1	1	1	1.8	1.8	1.8	79.211	0	6.5828	37251000	3	716	716	1.8	1	Q8N8K9	Q8N8K9	TRUE	1	1	1	1	1
Spermatid-associated protein	SPERT	sp|Q8NA61|SPERT_HUMAN Spermatid-associated protein OS=Homo sapiens OX=9606 GN=SPERT PE=1 SV=1	19.5433	19.5433	24.2437	1	1	1	1	3.3	3.3	3.3	51.57	0.090439	5.2862	19865000	0	448	448	3.3	1	Q8NA61	Q8NA61	TRUE	1	1	1	1	1
Ubiquitin carboxyl-terminal hydrolase 38	USP38	sp|Q8NB14|UBP38_HUMAN Ubiquitin carboxyl-terminal hydrolase 38 OS=Homo sapiens OX=9606 GN=USP38 PE=1 SV=2	19.3711	19.3711	24.7974	1	1	1	1	0.9	0.9	0.9	116.54	0.085106	5.3034	29158000	1	1042	1042	0.9	1	Q8NB14	Q8NB14	TRUE	1	1	1	1	1
Plasminogen activator inhibitor 1 RNA-binding protein	SERBP1	sp|Q8NC51|PAIRB_HUMAN Plasminogen activator inhibitor 1 RNA-binding protein OS=Homo sapiens OX=9606 GN=SERBP1 PE=1 SV=2	18.0694	18.0694	22.3173	2	2	2	2	6.6	6.6	6.6	44.965	0	13.458	5226100	2	408	408	6.6	1	Q8NC51	Q8NC51	True;True	2	2	2	2	2
Olfactory receptor 4X1	OR4X1	sp|Q8NH49|OR4X1_HUMAN Olfactory receptor 4X1 OS=Homo sapiens OX=9606 GN=OR4X1 PE=3 SV=1	23.4301	23.4301	26.5999	1	1	1	1	8.9	8.9	8.9	34.222	0.017361	5.7204	101710000	1	305	305	8.9	1	Q8NH49	Q8NH49	TRUE	1	1	1	1	1
Dynein heavy chain 3, axonemal	DNAH3	sp|Q8TD57|DYH3_HUMAN Dynein heavy chain 3, axonemal OS=Homo sapiens OX=9606 GN=DNAH3 PE=2 SV=1	21.7604	21.7604	29.5613	1	1	1	1	0.5	0.5	0.5	470.77	0.051829	5.4795	792210000	1	4116	4116	0.5	1	Q8TD57	Q8TD57	TRUE	1	1	1	1	1
Protein-methionine sulfoxide oxidase MICAL1	MICAL1	sp|Q8TDZ2|MICA1_HUMAN [F-actin]-monooxygenase MICAL1 OS=Homo sapiens OX=9606 GN=MICAL1 PE=1 SV=2				1	1	1	1	0.9	0.9	0.9	117.87	0.014652	5.866	0	1	1067	1067	0.9	1	Q8TDZ2	Q8TDZ2	TRUE	1	1	1	1	1
WASP homolog-associated protein with actin, membranes and microtubules	WHAMM	sp|Q8TF30|WHAMM_HUMAN WASP homolog-associated protein with actin, membranes and microtubules OS=Homo sapiens OX=9606 GN=WHAMM PE=1 SV=2	24.5489	24.5489	29.8708	1	1	1	1	2.1	2.1	2.1	90.923	0.064067	5.3598	981790000	2	809	809	2.1	1	Q8TF30	Q8TF30	TRUE	1	1	1	1	1
Intelectin-1	ITLN1	sp|Q8WWA0|ITLN1_HUMAN Intelectin-1 OS=Homo sapiens OX=9606 GN=ITLN1 PE=1 SV=1	24.5353	24.5353	28.4422	8	11	11	8	41.9	41.9	32.6	34.961	0	140.86	364720000	22	313	313	41.9	1	Q8WWA0	Q8WWA0	True;True;True;True;True;True;True;True;True;True;True	11	11	11	8	11
Intelectin-2	ITLN2	sp|Q8WWU7|ITLN2_HUMAN Intelectin-2 OS=Homo sapiens OX=9606 GN=ITLN2 PE=2 SV=1	19.1581	19.1581	23.328	1	4	1	1	20.6	11.7	11.7	36.211	0	9.277	10530000	3	325	325	20.6	1	Q8WWU7	Q8WWU7	True;False;False;False	1	4	1	1	4
Peroxidasin homolog	PXDN	sp|Q92626|PXDN_HUMAN Peroxidasin homolog OS=Homo sapiens OX=9606 GN=PXDN PE=1 SV=2				1	1	1	1	1.3	1.3	1.3	165.27	0.092072	5.2838	0	1	1479	1479	1.3	1	Q92626	Q92626	TRUE	1	1	1	1	1
COP9 signalosome complex subunit 5	COPS5	sp|Q92905|CSN5_HUMAN COP9 signalosome complex subunit 5 OS=Homo sapiens OX=9606 GN=COPS5 PE=1 SV=4	20.9017	20.9017	24.9891	1	1	1	1	4.2	4.2	4.2	37.578	0.01444	5.8305	33303000	2	334	334	4.2	1	Q92905	Q92905	TRUE	1	1	1	1	1
Caspase recruitment domain-containing protein 9	CARD9	sp|Q9H257|CARD9_HUMAN Caspase recruitment domain-containing protein 9 OS=Homo sapiens OX=9606 GN=CARD9 PE=1 SV=2				1	1	1	1	2.2	2.2	2.2	62.24	0.014134	5.7864	0	1	536	536	2.2	1	Q9H257	Q9H257	TRUE	1	1	1	1	1
Resistin	RETN	sp|Q9HD89|RETN_HUMAN Resistin OS=Homo sapiens OX=9606 GN=RETN PE=1 SV=1	23.0464	23.0464	25.8537	2	2	2	2	24.1	24.1	24.1	11.419	0	60.139	60638000	4	108	108	24.1	1	Q9HD89	Q9HD89	True;True	2	2	2	2	2
PR domain zinc finger protein 5	PRDM5	sp|Q9NQX1|PRDM5_HUMAN PR domain zinc finger protein 5 OS=Homo sapiens OX=9606 GN=PRDM5 PE=1 SV=2	21.3245	21.3245	26.2314	1	1	1	1	1.9	1.9	1.9	73.09	0.032468	5.5727	78787000	1	630	630	1.9	1	Q9NQX1	Q9NQX1	TRUE	1	1	1	1	1
Histone-lysine N-methyltransferase ASH1L	ASH1L	sp|Q9NR48|ASH1L_HUMAN Histone-lysine N-methyltransferase ASH1L OS=Homo sapiens OX=9606 GN=ASH1L PE=1 SV=2	18.5511	18.5511	25.5735	1	1	1	1	0.7	0.7	0.7	332.79	0.057307	5.3993	49934000	1	2969	2969	0.7	1	Q9NR48	Q9NR48	TRUE	1	1	1	1	1
Centlein	CNTLN	sp|Q9NXG0|CNTLN_HUMAN Centlein OS=Homo sapiens OX=9606 GN=CNTLN PE=1 SV=6	14.0138	14.0138	20.4567	1	1	1	1	1.1	1.1	1.1	161.57	0.089372	5.2662	1439100	0	1405	1405	1.1	1	Q9NXG0	Q9NXG0	TRUE	1	1	1	1	1
Ral guanine nucleotide dissociation stimulator-like 1	RGL1	sp|Q9NZL6|RGL1_HUMAN Ral guanine nucleotide dissociation stimulator-like 1 OS=Homo sapiens OX=9606 GN=RGL1 PE=1 SV=1	16.861	16.861	21.9485	1	1	1	1	5.5	5.5	5.5	86.7	0.090024	5.2668	4047200	1	768	768	5.5	1	Q9NZL6	Q9NZL6	TRUE	1	1	1	1	1
Calmodulin-like protein 5	CALML5	sp|Q9NZT1|CALL5_HUMAN Calmodulin-like protein 5 OS=Homo sapiens OX=9606 GN=CALML5 PE=1 SV=2	20.6871	20.6871	23.857	2	2	2	2	9.6	9.6	9.6	15.892	0	13.063	15194000	3	146	146	9.6	1	Q9NZT1	Q9NZT1	True;True	2	2	2	2	2
Protein FAM8A1	FAM8A1	sp|Q9UBU6|FA8A1_HUMAN Protein FAM8A1 OS=Homo sapiens OX=9606 GN=FAM8A1 PE=1 SV=1	17.3477	17.3477	21.5956	1	1	1	1	1.9	1.9	1.9	44.123	0.090452	5.2752	3169000	0	413	413	1.9	1	Q9UBU6	Q9UBU6	TRUE	1	1	1	1	1
RNA-binding protein Raly	RALY	sp|Q9UKM9|RALY_HUMAN RNA-binding protein Raly OS=Homo sapiens OX=9606 GN=RALY PE=1 SV=1;tr|Q5QPM0|Q5QPM0_HUMAN RNA-binding protein Raly (Fragment) OS=Homo sapiens OX=9606 GN=RALY PE=1 SV=8;tr|Q5QPL9|Q5QPL9_HUMAN RNA-binding protein Raly (Fragment) OS=Homo	19.9929	19.9929	23.9929	2	2	2	2	19.3	19.3	19.3	32.463	0	10.875	16695000	2	306		19.3	3	Q9UKM9;Q5QPM0;Q5QPL9	Q9UKM9;Q5QPM0;Q5QPL9	True;True	2	2;1;1	2;1;1	2;1;1	2
Group IID secretory phospholipase A2	PLA2G2D	sp|Q9UNK4|PA2GD_HUMAN Group IID secretory phospholipase A2 OS=Homo sapiens OX=9606 GN=PLA2G2D PE=1 SV=2	22.7834	22.7834	25.9533	4	4	4	4	38.6	38.6	38.6	16.546	0	29.849	64971000	9	145		38.6	2	Q9UNK4;A0A087WZT4	Q9UNK4	True;True;True;True	4	4;1	4;1	4;1	4
Sodium/hydrogen exchanger 8	SLC9A8	sp|Q9Y2E8|SL9A8_HUMAN Sodium/hydrogen exchanger 8 OS=Homo sapiens OX=9606 GN=SLC9A8 PE=1 SV=4	23.1253	23.1253	27.2127	1	1	1	1	1.7	1.7	1.7	65.421	0.057143	5.3959	155540000	1	581	581	1.7	1	Q9Y2E8	Q9Y2E8	TRUE	1	1	1	1	1
Chromatin target of PRMT1 protein	CHTOP	tr|X6R700|X6R700_HUMAN Chromatin target of PRMT1 protein OS=Homo sapiens OX=9606 GN=CHTOP PE=1 SV=1;sp|Q9Y3Y2|CHTOP_HUMAN Chromatin target of PRMT1 protein OS=Homo sapiens OX=9606 GN=CHTOP PE=1 SV=2	19.811	19.811	22.811	1	1	1	1	5.8	5.8	5.8	23.661	0.017422	5.7294	7358500	0	223		5.8	2	X6R700;Q9Y3Y2	X6R700;Q9Y3Y2	TRUE	1	1;1	1;1	1;1	1
	CSAD	tr|Q9Y602|Q9Y602_HUMAN Cysteine sulfinic acid decarboxylase OS=Homo sapiens OX=9606 GN=CSAD PE=1 SV=1	22.7206	22.7206	26.3056	1	1	1	1	2.6	2.6	2.6	30.264	0.09068	5.2757	82941000	1	267	267	2.6	1	Q9Y602	Q9Y602	TRUE	1	1	1	1	1

## Sheet: Patient 3
Protein names	Gene names	Fasta headers	iBAQ P3_interactome	iBAQ	Intensity P3_interactome	Peptides	Razor + unique peptides	Unique peptides	Sequence coverage [%]	Unique + razor sequence coverage [%]	Unique sequence coverage [%]	Mol. weight [kDa]	Q-value	Score	Intensity	MS/MS count	Sequence coverage P3_interactome [%]	Sequence lengths	Sequence length	Number of proteins	Protein IDs	Majority protein IDs	Unique peptides P3_interactome	Razor + unique peptides P3_interactome	Peptides P3_interactome	Peptide counts (unique)	Peptide counts (razor+unique)	Peptide counts (all)	Peptide is razor
Apolipoprotein C-II;Proapolipoprotein C-II	APOC2;APOC4-APOC2	tr|Q6P163|Q6P163_HUMAN APOC2 protein OS=Homo sapiens OX=9606 GN=APOC2 PE=1 SV=1;tr|A0A024R0T9|A0A024R0T9_HUMAN Apolipoprotein C-II isoform 1 OS=Homo sapiens OX=9606 GN=APOC4-APOC2 PE=1 SV=1;tr|K7ER74|K7ER74_HUMAN APOC4-APOC2 readthrough (NMD candidate) OS=	25.5371	25.5371	27.122	3	3	3	27.8	27.8	27.8	8.1463	0	3.9546	146060000	4	27.8		72	4	Q6P163;A0A024R0T9;K7ER74;P02655	Q6P163;A0A024R0T9;K7ER74;P02655	3	3	3	3;3;3;3	3;3;3;3	3;3;3;3	True;True;True
Solute carrier organic anion transporter family member 2B1	SLCO2B1	tr|A0A0A0MTF1|A0A0A0MTF1_HUMAN Solute carrier organic anion transporter family member OS=Homo sapiens OX=9606 GN=SLCO2B1 PE=1 SV=1;tr|E9PRW4|E9PRW4_HUMAN Solute carrier organic anion transporter family member OS=Homo sapiens OX=9606 GN=SLCO2B1 PE=1 SV=2;tr	19.2316	19.2316	23.0389	1	1	1	1.4	1.4	1.4	61.164	0.035714	1.0716	8618000	1	1.4		565	4	A0A0A0MTF1;E9PRW4;A0A024R5I4;O94956	A0A0A0MTF1;E9PRW4;A0A024R5I4;O94956	1	1	1	1;1;1;1	1;1;1;1	1;1;1;1	TRUE
	SERPINA1	tr|A0A024R6I7|A0A024R6I7_HUMAN Alpha-1-antitrypsin OS=Homo sapiens OX=9606 GN=SERPINA1 PE=1 SV=1;tr|A0A0G2JRN3|A0A0G2JRN3_HUMAN Alpha-1-antitrypsin OS=Homo sapiens OX=9606 GN=SERPINA1 PE=1 SV=1	28.5088	28.5088	33.0324	32	32	3	67.7	67.7	6.2	46.708	0	323.31	8785200000	126	67.7		418	9	A0A024R6I7;A0A0G2JRN3;G3V2B9;G3V544;G3V5R8;G3V387;A0A0B4J278;A0A0G2JPK4;P20848	A0A024R6I7;A0A0G2JRN3	3	32	32	3;3;0;0;0;0;0;0;0	32;27;7;3;2;2;2;1;1	32;27;7;3;2;2;2;1;1	True;True;True;True;True;True;True;True;True;True;True;True;True;True;True;True;True;True;True;True;True;True;True;True;True;True;True;True;True;True;True;True
	IGLV4-69	sp|A0A075B6H9|LV469_HUMAN Immunoglobulin lambda variable 4-69 OS=Homo sapiens OX=9606 GN=IGLV4-69 PE=1 SV=1	26.4165	26.4165	28.7384	5	5	5	43.7	43.7	43.7	12.773	0	22.35	447840000	15	43.7	119	119	1	A0A075B6H9	A0A075B6H9	5	5	5	5	5	5	True;True;True;True;True
	IGLV8-61	sp|A0A075B6I0|LV861_HUMAN Immunoglobulin lambda variable 8-61 OS=Homo sapiens OX=9606 GN=IGLV8-61 PE=3 SV=7	26.5751	26.5751	28.5751	2	2	2	13.1	13.1	13.1	12.814	0	5.497	399900000	6	13.1	122	122	1	A0A075B6I0	A0A075B6I0	2	2	2	2	2	2	True;True
	IGLV4-60	sp|A0A075B6I1|LV460_HUMAN Immunoglobulin lambda variable 4-60 OS=Homo sapiens OX=9606 GN=IGLV4-60 PE=3 SV=1	24.0051	24.0051	26.3271	3	3	3	21.7	21.7	21.7	12.987	0	5.1548	84187000	5	21.7	120	120	1	A0A075B6I1	A0A075B6I1	3	3	3	3	3	3	True;True;True
	IGLV10-54	tr|A0A1W2PQ80|A0A1W2PQ80_HUMAN Immunoglobulin lambda variable 10-54 OS=Homo sapiens OX=9606 GN=IGLV10-54 PE=1 SV=1;sp|A0A075B6I4|LVX54_HUMAN Immunoglobulin lambda variable 10-54 OS=Homo sapiens OX=9606 GN=IGLV10-54 PE=3 SV=1	24.6282	24.6282	25.6282	1	1	1	9.4	9.4	9.4	12.733	0	2.2931	51863000	2	9.4		117	2	A0A1W2PQ80;A0A075B6I4	A0A1W2PQ80;A0A075B6I4	1	1	1	1;1	1;1	1;1	TRUE
	IGLV5-48	tr|A0A075B6I7|A0A075B6I7_HUMAN Immunoglobulin lambda variable 5-48 (non-functional) OS=Homo sapiens OX=9606 GN=IGLV5-48 PE=1 SV=2	21.3627	21.3627	23.6846	1	1	1	12.4	12.4	12.4	11.247	0	2.0217	13483000	2	12.4	105	105	1	A0A075B6I7	A0A075B6I7	1	1	1	1	1	1	TRUE
	IGLV7-46	sp|A0A075B6I9|LV746_HUMAN Immunoglobulin lambda variable 7-46 OS=Homo sapiens OX=9606 GN=IGLV7-46 PE=3 SV=4	26.7032	26.7032	28.7031	4	4	2	21.4	21.4	13.7	12.468	0	6.1712	437020000	6	21.4	117	117	1	A0A075B6I9	A0A075B6I9	2	4	4	2	4	4	True;True;True;True
	IGLV2-18	sp|A0A075B6J9|LV218_HUMAN Immunoglobulin lambda variable 2-18 OS=Homo sapiens OX=9606 GN=IGLV2-18 PE=3 SV=2	25.7924	25.7924	26.7924	2	2	2	24.6	24.6	24.6	12.412	0	16.377	116230000	4	24.6	118	118	1	A0A075B6J9	A0A075B6J9	2	2	2	2	2	2	True;True
	IGLV3-16	sp|A0A075B6K0|LV316_HUMAN Immunoglobulin lambda variable 3-16 OS=Homo sapiens OX=9606 GN=IGLV3-16 PE=3 SV=2	27.4756	27.4756	29.0605	2	1	1	18.3	8.7	8.7	12.466	0	2.155	559880000	5	18.3	115	115	1	A0A075B6K0	A0A075B6K0	1	1	2	1	1	2	False;True
	IGLV3-10	sp|A0A075B6K4|LV310_HUMAN Immunoglobulin lambda variable 3-10 OS=Homo sapiens OX=9606 GN=IGLV3-10 PE=3 SV=2	26.5372	26.5372	28.5372	5	5	3	35.7	35.7	35.7	12.441	0	6.5987	389550000	9	35.7	115	115	1	A0A075B6K4	A0A075B6K4	3	5	5	3	5	5	True;True;True;True;True
	IGLV3-9	sp|A0A075B6K5|LV39_HUMAN Immunoglobulin lambda variable 3-9 OS=Homo sapiens OX=9606 GN=IGLV3-9 PE=3 SV=1	28.1196	28.1196	30.4415	4	4	2	49.6	49.6	26.1	12.332	0	161.22	1458200000	13	49.6		115	2	A0A075B6K5;A0A075B6K2	A0A075B6K5	2	4	4	2;0	4;1	4;1	True;True;True;True
Ig kappa chain V-II region FR	IGKV2D-28	sp|A0A075B6P5|KV228_HUMAN Immunoglobulin kappa variable 2-28 OS=Homo sapiens OX=9606 GN=IGKV2-28 PE=3 SV=1;sp|P01615|KVD28_HUMAN Immunoglobulin kappa variable 2D-28 OS=Homo sapiens OX=9606 GN=IGKV2D-28 PE=1 SV=2	26.0526	26.0526	27.6376	5	1	1	48.3	29.2	29.2	12.957	0	6.3818	208810000	2	48.3		120	2	A0A075B6P5;P01615	A0A075B6P5;P01615	1	1	5	1;1	1;1	5;5	False;False;False;False;True
	IGKV2-24;IGKV2D-24	sp|A0A0C4DH68|KV224_HUMAN Immunoglobulin kappa variable 2-24 OS=Homo sapiens OX=9606 GN=IGKV2-24 PE=3 SV=1;tr|A0A075B6R9|A0A075B6R9_HUMAN Immunoglobulin kappa variable 2D-24 (non-functional) (Fragment) OS=Homo sapiens OX=9606 GN=IGKV2D-24 PE=1 SV=1	27.9024	27.9024	29.9024	4	3	3	38.3	38.3	38.3	13.079	0	124.51	1003500000	13	38.3		120	2	A0A0C4DH68;A0A075B6R9	A0A0C4DH68;A0A075B6R9	3	3	4	3;3	3;3	4;4	True;False;True;True
	IGKV2D-29;IGKV A18;IGKV2D-26	sp|A0A075B6S2|KVD29_HUMAN Immunoglobulin kappa variable 2D-29 OS=Homo sapiens OX=9606 GN=IGKV2D-29 PE=3 SV=1;sp|A2NJV5|KV229_HUMAN Immunoglobulin kappa variable 2-29 OS=Homo sapiens OX=9606 GN=IGKV2-29 PE=3 SV=2;sp|A0A0A0MRZ7|KVD26_HUMAN Immunoglobulin kap	27.8472	27.8472	30.1691	5	3	2	39.2	36.7	36.7	13.143	0	43.733	1207300000	7	39.2		120	3	A0A075B6S2;A2NJV5;A0A0A0MRZ7	A0A075B6S2;A2NJV5;A0A0A0MRZ7	2	3	5	2;1;1	3;2;2	5;4;4	False;False;True;True;True
	IGKV1-27	sp|A0A075B6S5|KV127_HUMAN Immunoglobulin kappa variable 1-27 OS=Homo sapiens OX=9606 GN=IGKV1-27 PE=3 SV=1	24.67	24.67	26.9919	3	2	2	53.8	40.2	40.2	12.711	0	26.452	133470000	5	53.8	117	117	1	A0A075B6S5	A0A075B6S5	2	2	3	2	2	3	True;True;False
	IGKV1D-37	tr|A0A075B6S9|A0A075B6S9_HUMAN Immunoglobulin kappa variable 1-37 (non-functional) (Fragment) OS=Homo sapiens OX=9606 GN=IGKV1-37 PE=1 SV=7				1	1	1	13.7	13.7	13.7	12.688	0	2.7229	0	1	13.7	117	117	1	A0A075B6S9	A0A075B6S9	1	1	1	1	1	1	TRUE
GRIP1-associated protein 1	GRIPAP1	tr|A0A087WXA6|A0A087WXA6_HUMAN GRIP1-associated protein 1 (Fragment) OS=Homo sapiens OX=9606 GN=GRIPAP1 PE=1 SV=1;tr|A0A087WT45|A0A087WT45_HUMAN GRIP1-associated protein 1 OS=Homo sapiens OX=9606 GN=GRIPAP1 PE=1 SV=1;tr|A0A075B793|A0A075B793_HUMAN GRIP1-as	20.6796	20.6796	24.487	1	1	1	2.3	2.3	2.3	35.029	0.097179	0.63629	23513000	1	2.3		302	4	A0A087WXA6;A0A087WT45;A0A075B793;Q4V328	A0A087WXA6;A0A087WT45;A0A075B793;Q4V328	1	1	1	1;1;1;1	1;1;1;1	1;1;1;1	TRUE
	IGHV3OR16-12	tr|A0A075B7B8|A0A075B7B8_HUMAN Immunoglobulin heavy variable 3/OR16-12 (non-functional) (Fragment) OS=Homo sapiens OX=9606 GN=IGHV3OR16-12 PE=1 SV=1	26.4967	26.4967	29.304	3	2	2	26.5	17.1	17.1	12.874	0	24.119	662810000	11	26.5	117	117	1	A0A075B7B8	A0A075B7B8	2	2	3	2	2	3	True;False;True
	IGHV1OR15-1	tr|A0A075B7D0|A0A075B7D0_HUMAN Immunoglobulin heavy variable 1/OR15-1 (non-functional) (Fragment) OS=Homo sapiens OX=9606 GN=IGHV1OR15-1 PE=1 SV=1				1	1	1	9.4	9.4	9.4	13.012	0.050388	0.79196	0	1	9.4	117	117	1	A0A075B7D0	A0A075B7D0	1	1	1	1	1	1	TRUE
	IGHV3OR15-7	tr|A0A075B7D8|A0A075B7D8_HUMAN Immunoglobulin heavy variable 3/OR15-7 (pseudogene) (Fragment) OS=Homo sapiens OX=9606 GN=IGHV3OR15-7 PE=1 SV=1	26.3278	26.3278	29.1351	4	2	2	31.1	18.5	18.5	13.08	0	4.3653	589580000	5	31.1	119	119	1	A0A075B7D8	A0A075B7D8	2	2	4	2	2	4	False;False;True;True
	IGKV3D-15	sp|A0A087WSY6|KVD15_HUMAN Immunoglobulin kappa variable 3D-15 OS=Homo sapiens OX=9606 GN=IGKV3D-15 PE=3 SV=6	27.6731	27.6731	29.2581	3	2	1	32.2	26.1	7.8	12.534	0	25.159	642040000	8	32.2	115	115	1	A0A087WSY6	A0A087WSY6	1	2	3	1	2	3	True;False;True
Keratin-associated protein 10-9	KRTAP10-9	tr|A0A087WT19|A0A087WT19_HUMAN Keratin-associated protein 10-9 OS=Homo sapiens OX=9606 GN=KRTAP10-9 PE=4 SV=1;sp|P60411|KR109_HUMAN Keratin-associated protein 10-9 OS=Homo sapiens OX=9606 GN=KRTAP10-9 PE=1 SV=2	32.0993	32.0993	32.0993	1	1	1	4.2	4.2	4.2	19.72	0.050193	0.78794	4600900000	2	4.2		192	2	A0A087WT19;P60411	A0A087WT19;P60411	1	1	1	1;1	1;1	1;1	TRUE
IQ motif and SEC7 domain-containing protein 1	IQSEC1	tr|A0A2R8Y695|A0A2R8Y695_HUMAN IQ motif and SEC7 domain-containing protein 1 (Fragment) OS=Homo sapiens OX=9606 GN=IQSEC1 PE=1 SV=1;tr|A0A3B3IU98|A0A3B3IU98_HUMAN IQ motif and SEC7 domain-containing protein 1 (Fragment) OS=Homo sapiens OX=9606 GN=IQSEC1 PE	19.5863	19.5863	24.7958	1	1	1	4.6	4.6	4.6	87.806	0.093851	0.64529	29125000	0	4.6		779	7	A0A2R8Y695;A0A3B3IU98;A0A0C4DGT3;A0A2R8Y7T6;A0A087WWK8;A0A3B3IRZ4;Q6DN90	A0A2R8Y695;A0A3B3IU98;A0A0C4DGT3;A0A2R8Y7T6;A0A087WWK8;A0A3B3IRZ4;Q6DN90	1	1	1	1;1;1;1;1;1;1	1;1;1;1;1;1;1	1;1;1;1;1;1;1	TRUE
Apolipoprotein(a)	LPA	tr|A0A087WWY0|A0A087WWY0_HUMAN Apolipoprotein(a) OS=Homo sapiens OX=9606 GN=LPA PE=1 SV=1;sp|P08519|APOA_HUMAN Apolipoprotein(a) OS=Homo sapiens OX=9606 GN=LPA PE=1 SV=1	18.0799	18.0799	22.4722	2	2	2	22.6	22.6	22.6	62.553	0	5.0158	5818600	2	22.6		571	2	A0A087WWY0;P08519	A0A087WWY0;P08519	2	2	2	2;2	2;2	2;2	True;True
WASH complex subunit FAM21C;WASH complex subunit FAM21A	FAM21A;FAM21C	tr|B1AP61|B1AP61_HUMAN WASH complex subunit 2A (Fragment) OS=Homo sapiens OX=9606 GN=WASHC2A PE=1 SV=1;tr|A0A087WYF6|A0A087WYF6_HUMAN WASH complex subunit 2A OS=Homo sapiens OX=9606 GN=WASHC2A PE=1 SV=1;tr|F8W7U3|F8W7U3_HUMAN WASH complex subunit 2A OS=Hom	23.2244	23.2244	26.5463	1	1	1	7.7	7.7	7.7	17.637	0.0093897	1.3484	98000000	1	7.7		156	9	B1AP61;A0A087WYF6;F8W7U3;J3KP36;E7ESD2;A0A0A0MR88;A0A096LPC5;Q9Y4E1;Q641Q2	B1AP61;A0A087WYF6;F8W7U3;J3KP36;E7ESD2;A0A0A0MR88;A0A096LPC5;Q9Y4E1;Q641Q2	1	1	1	1;1;1;1;1;1;1;1;1	1;1;1;1;1;1;1;1;1	1;1;1;1;1;1;1;1;1	TRUE
Histo-blood group ABO system transferase;Fucosylglycoprotein alpha-N-acetylgalactosaminyltransferase soluble form	ABO	tr|A0A087X0C2|A0A087X0C2_HUMAN Histo-blood group ABO system transferase OS=Homo sapiens OX=9606 GN=ABO PE=1 SV=1;tr|A0A087X009|A0A087X009_HUMAN Histo-blood group ABO system transferase OS=Homo sapiens OX=9606 GN=ABO PE=1 SV=1;sp|P16442|BGAT_HUMAN Histo-blo	18.5995	18.5995	23.0589	1	1	1	2	2	2	40.834	0.1018	0.62849	8738200	1	2		353	3	A0A087X0C2;A0A087X009;P16442	A0A087X0C2;A0A087X009;P16442	1	1	1	1;1;1	1;1;1	1;1;1	TRUE
Ig kappa chain V-II region Cum	IGKV2-40	tr|A0A087X0Q4|A0A087X0Q4_HUMAN Immunoglobulin kappa variable 2-40 OS=Homo sapiens OX=9606 GN=IGKV2-40 PE=1 SV=1;sp|A0A087WW87|KV240_HUMAN Immunoglobulin kappa variable 2-40 OS=Homo sapiens OX=9606 GN=IGKV2-40 PE=3 SV=2;sp|P01614|KVD40_HUMAN Immunoglobulin	32.3218	32.3218	34.3217	8	8	4	94.2	94.2	75	11.434	0	323.31	21472000000	74	94.2		104	3	A0A087X0Q4;A0A087WW87;P01614	A0A087X0Q4;A0A087WW87;P01614	4	8	8	4;3;3	8;7;7	8;7;7	True;True;True;True;True;True;True;True
Monocarboxylate transporter 10	SLC16A10	tr|A0A087X138|A0A087X138_HUMAN Monocarboxylate transporter 10 OS=Homo sapiens OX=9606 GN=SLC16A10 PE=1 SV=1;sp|Q8TF71|MOT10_HUMAN Monocarboxylate transporter 10 OS=Homo sapiens OX=9606 GN=SLC16A10 PE=1 SV=1	24.3464	24.3464	26.9313	1	1	1	10.4	10.4	10.4	34.779	0.10123	0.63065	127980000	0	10.4		326	2	A0A087X138;Q8TF71	A0A087X138;Q8TF71	1	1	1	1;1	1;1	1;1	TRUE
Zinc finger protein 117	ZNF117	tr|A0A087X2A5|A0A087X2A5_HUMAN Zinc finger protein 117 OS=Homo sapiens OX=9606 GN=ZNF117 PE=4 SV=1;sp|Q03924|ZN117_HUMAN Zinc finger protein 117 OS=Homo sapiens OX=9606 GN=ZNF117 PE=2 SV=5	19.8656	19.8656	24.1875	1	1	1	2.9	2.9	2.9	45.084	0.092357	0.64084	19106000	0	2.9		383	2	A0A087X2A5;Q03924	A0A087X2A5;Q03924	1	1	1	1;1	1;1	1;1	TRUE
WD repeat-containing protein 20	WDR20	tr|A0A088AWN2|A0A088AWN2_HUMAN WD repeat-containing protein 20 OS=Homo sapiens OX=9606 GN=WDR20 PE=1 SV=1;sp|Q8TBZ3|WDR20_HUMAN WD repeat-containing protein 20 OS=Homo sapiens OX=9606 GN=WDR20 PE=1 SV=2				1	1	1	1.8	1.8	1.8	67.475	0.083624	0.6873	0	1	1.8		612	2	A0A088AWN2;Q8TBZ3	A0A088AWN2;Q8TBZ3	1	1	1	1;1	1;1	1;1	TRUE
Serum amyloid A-4 protein	SAA2-SAA4;SAA4	tr|A0A096LPE2|A0A096LPE2_HUMAN SAA2-SAA4 readthrough OS=Homo sapiens OX=9606 GN=SAA2-SAA4 PE=4 SV=1;sp|P35542|SAA4_HUMAN Serum amyloid A-4 protein OS=Homo sapiens OX=9606 GN=SAA4 PE=1 SV=2	24.9477	24.9477	28.5327	7	7	4	38	38	24.5	23.353	0	33.063	388330000	17	38		208	5	A0A096LPE2;P35542;A0A3B3ISW8;E9PR14;G3V1D9	A0A096LPE2;P35542	4	7	7	4;4;0;0;0	7;4;3;3;3	7;4;3;3;3	True;True;True;True;True;True;True
MAP kinase-activating death domain protein	MADD	tr|A0A0A0MRB5|A0A0A0MRB5_HUMAN MAP kinase-activating death domain protein OS=Homo sapiens OX=9606 GN=MADD PE=1 SV=1;sp|Q8WXG6|MADD_HUMAN MAP kinase-activating death domain protein OS=Homo sapiens OX=9606 GN=MADD PE=1 SV=2	17.1041	17.1041	23.2538	1	1	1	0.5	0.5	0.5	176.55	0.047619	0.84509	10002000	1	0.5		1588	2	A0A0A0MRB5;Q8WXG6	A0A0A0MRB5;Q8WXG6	1	1	1	1;1	1;1	1;1	TRUE
WD repeat-containing protein 47	WDR47	tr|A0A0A0MRE6|A0A0A0MRE6_HUMAN WD repeat-containing protein 47 OS=Homo sapiens OX=9606 GN=WDR47 PE=1 SV=1;sp|O94967|WDR47_HUMAN WD repeat-containing protein 47 OS=Homo sapiens OX=9606 GN=WDR47 PE=1 SV=1	16.6082	16.6082	21.8936	1	1	1	2.1	2.1	2.1	98.701	0.081272	0.69439	3896100	0	2.1		893	2	A0A0A0MRE6;O94967	A0A0A0MRE6;O94967	1	1	1	1;1	1;1	1;1	TRUE
Caspase-7;Caspase-7 subunit p20;Caspase-7 subunit p11	CASP7	tr|Q5SVL2|Q5SVL2_HUMAN Caspase-7 (Fragment) OS=Homo sapiens OX=9606 GN=CASP7 PE=1 SV=1;tr|A0A0A0MRL7|A0A0A0MRL7_HUMAN Caspase-7 OS=Homo sapiens OX=9606 GN=CASP7 PE=1 SV=1;sp|P55210|CASP7_HUMAN Caspase-7 OS=Homo sapiens OX=9606 GN=CASP7 PE=1 SV=1	25.0131	25.0131	28.8204	1	1	1	3.2	3.2	3.2	24.79	0.080986	0.6943	474040000	1	3.2		222	3	Q5SVL2;A0A0A0MRL7;P55210	Q5SVL2;A0A0A0MRL7;P55210	1	1	1	1;1;1	1;1;1	1;1;1	TRUE
Ig kappa chain V-III region VG	IGKV3D-11	sp|A0A0A0MRZ8|KVD11_HUMAN Immunoglobulin kappa variable 3D-11 OS=Homo sapiens OX=9606 GN=IGKV3D-11 PE=3 SV=6;sp|P04433|KV311_HUMAN Immunoglobulin kappa variable 3-11 OS=Homo sapiens OX=9606 GN=IGKV3-11 PE=1 SV=1	30.1854	30.1854	32.1854	3	3	2	32.2	32.2	26.1	12.625	0	35.121	4884100000	13	32.2		115	2	A0A0A0MRZ8;P04433	A0A0A0MRZ8;P04433	2	3	3	2;2	3;3	3;3	True;True;True
Ig gamma-1 chain C region	IGHG1	sp|P01857|IGHG1_HUMAN Immunoglobulin heavy constant gamma 1 OS=Homo sapiens OX=9606 GN=IGHG1 PE=1 SV=1;tr|A0A0A0MS08|A0A0A0MS08_HUMAN Immunoglobulin heavy constant gamma 1 (Fragment) OS=Homo sapiens OX=9606 GN=IGHG1 PE=1 SV=1;tr|A0A0A0MS07|A0A0A0MS07_HUMAN	34.2044	34.2044	38.1113	22	16	10	70	60.3	41.2	36.105	0	323.31	296920000000	314	70		330	3	P01857;A0A0A0MS08;A0A0A0MS07	P01857;A0A0A0MS08;A0A0A0MS07	10	16	22	10;10;7	16;16;11	22;22;17	True;True;False;True;False;True;True;True;True;False;False;True;True;False;True;True;True;True;True;True;True;False
	IGHV3-49	sp|A0A0A0MS15|HV349_HUMAN Immunoglobulin heavy variable 3-49 OS=Homo sapiens OX=9606 GN=IGHV3-49 PE=3 SV=1	25.0781	25.0781	27.8855	6	5	4	46.2	38.7	38.7	13.056	0	10.377	247950000	10	46.2	119	119	1	A0A0A0MS15	A0A0A0MS15	4	5	6	4	5	6	False;True;True;True;True;True
	IGKV6D-21;IGKV6D-41	sp|A0A0A0MT36|KVD21_HUMAN Immunoglobulin kappa variable 6D-21 OS=Homo sapiens OX=9606 GN=IGKV6D-21 PE=3 SV=1;tr|A0A0C4DH26|A0A0C4DH26_HUMAN Immunoglobulin kappa variable 6D-41 (non-functional) (Fragment) OS=Homo sapiens OX=9606 GN=IGKV6D-41 PE=4 SV=1	22.0844	22.0844	24.0844	1	1	1	10.5	10.5	10.5	12.34	0.018605	1.285	17788000	3	10.5		114	2	A0A0A0MT36;A0A0C4DH26	A0A0A0MT36;A0A0C4DH26	1	1	1	1;1	1;1	1;1	TRUE
	IGLV1-36	sp|A0A0B4J1U3|LV136_HUMAN Immunoglobulin lambda variable 1-36 OS=Homo sapiens OX=9606 GN=IGLV1-36 PE=1 SV=5	23.8761	23.8761	24.8761	1	1	1	13.7	13.7	13.7	12.478	0	8.1489	30793000	1	13.7	117	117	1	A0A0B4J1U3	A0A0B4J1U3	1	1	1	1	1	1	TRUE
	IGHV6-1	sp|A0A0B4J1U7|HV601_HUMAN Immunoglobulin heavy variable 6-1 OS=Homo sapiens OX=9606 GN=IGHV6-1 PE=3 SV=1	26.9469	26.9469	28.9469	1	1	1	5.8	5.8	5.8	13.481	0.044898	0.88774	517470000	2	5.8	121	121	1	A0A0B4J1U7	A0A0B4J1U7	1	1	1	1	1	1	TRUE
	IGHV3-15	sp|A0A0B4J1V0|HV315_HUMAN Immunoglobulin heavy variable 3-15 OS=Homo sapiens OX=9606 GN=IGHV3-15 PE=3 SV=1	29.0237	29.0237	31.831	10	10	7	57.1	57.1	42.9	12.926	0	323.31	3820300000	42	57.1	119	119	1	A0A0B4J1V0	A0A0B4J1V0	7	10	10	7	10	10	True;True;True;True;True;True;True;True;True;True
Ig heavy chain V-III region WEA	IGHV3-21;IGHV3OR16-10	sp|A0A0B4J1V1|HV321_HUMAN Immunoglobulin heavy variable 3-21 OS=Homo sapiens OX=9606 GN=IGHV3-21 PE=1 SV=1;sp|P01763|HV348_HUMAN Immunoglobulin heavy variable 3-48 OS=Homo sapiens OX=9606 GN=IGHV3-48 PE=1 SV=2;tr|A0A075B7F0|A0A075B7F0_HUMAN Immunoglobulin	25.7382	25.7382	27.7382	5	1	1	42.7	16.2	16.2	12.839	0	89.945	223880000	18	42.7		117	4	A0A0B4J1V1;P01763;A0A075B7F0;A0A0J9YVY3	A0A0B4J1V1;P01763;A0A075B7F0	1	1	5	1;0;0;0	1;0;0;0	5;4;3;1	False;False;False;True;False
	IGHV3-73	sp|A0A0B4J1V6|HV373_HUMAN Immunoglobulin heavy variable 3-73 OS=Homo sapiens OX=9606 GN=IGHV3-73 PE=3 SV=1	22.2676	22.2676	25.0749	5	2	2	47.9	25.2	25.2	12.858	0	5.0317	35343000	4	47.9	119	119	1	A0A0B4J1V6	A0A0B4J1V6	2	2	5	2	2	5	False;False;True;True;False
	IGHV3-74;IGHV3OR16-13	sp|A0A0B4J1X5|HV374_HUMAN Immunoglobulin heavy variable 3-74 OS=Homo sapiens OX=9606 GN=IGHV3-74 PE=3 SV=1;tr|A0A075B7E8|A0A075B7E8_HUMAN Immunoglobulin heavy variable 3/OR16-13 (non-functional) (Fragment) OS=Homo sapiens OX=9606 GN=IGHV3OR16-13 PE=1 SV=1	28.0147	28.0147	30.8221	9	6	5	65.8	56.4	52.1	12.839	0	104.2	1898300000	20	65.8		117	2	A0A0B4J1X5;A0A075B7E8	A0A0B4J1X5;A0A075B7E8	5	6	9	5;4	6;4	9;5	False;True;True;True;True;True;False;False;True
	IGHV3-43	sp|A0A0B4J1X8|HV343_HUMAN Immunoglobulin heavy variable 3-43 OS=Homo sapiens OX=9606 GN=IGHV3-43 PE=3 SV=1	24.3903	24.3903	26.9753	4	2	2	38.1	25.4	25.4	13.077	0	20.437	131940000	6	38.1	118	118	1	A0A0B4J1X8	A0A0B4J1X8	2	2	4	2	2	4	False;True;False;True
	IGLV9-49	sp|A0A0B4J1Y8|LV949_HUMAN Immunoglobulin lambda variable 9-49 OS=Homo sapiens OX=9606 GN=IGLV9-49 PE=1 SV=1	23.4769	23.4769	25.7989	2	2	2	16.3	16.3	16.3	13.024	0	4.185	58375000	4	16.3	123	123	1	A0A0B4J1Y8	A0A0B4J1Y8	2	2	2	2	2	2	True;True
	IGHV3-72	sp|A0A0B4J1Y9|HV372_HUMAN Immunoglobulin heavy variable 3-72 OS=Homo sapiens OX=9606 GN=IGHV3-72 PE=3 SV=1	27.3646	27.3646	29.6866	9	6	4	64.7	50.4	37.8	13.203	0	82.371	864060000	28	64.7	119	119	1	A0A0B4J1Y9	A0A0B4J1Y9	4	6	9	4	6	9	True;True;False;False;True;True;True;False;True
Immunoglobulin lambda-like polypeptide 5;Ig lambda-1 chain C regions	IGLL5;IGLC1	tr|A0A0B4J231|A0A0B4J231_HUMAN Immunoglobulin lambda-like polypeptide 5 OS=Homo sapiens OX=9606 GN=IGLL5 PE=1 SV=1;sp|B9A064|IGLL5_HUMAN Immunoglobulin lambda-like polypeptide 5 OS=Homo sapiens OX=9606 GN=IGLL5 PE=2 SV=2;sp|P0CG04|IGLC1_HUMAN Immunoglobuli	29.4215	29.4215	32.881	16	7	6	51.2	22.8	22.8	23.15	0	74.282	7909700000	81	51.2		215	3	A0A0B4J231;B9A064;P0CG04	A0A0B4J231;B9A064;P0CG04	6	7	16	6;6;4	7;7;5	16;16;14	True;True;True;True;True;False;False;False;False;False;False;False;True;True;False;False
	IGHV3OR16-9	tr|A0A0B4J2B5|A0A0B4J2B5_HUMAN Immunoglobulin heavy variable 3/OR16-9 (non-functional) (Fragment) OS=Homo sapiens OX=9606 GN=IGHV3OR16-9 PE=1 SV=1;tr|S4R460|S4R460_HUMAN Immunoglobulin heavy variable 3/OR16-9 (non-functional) OS=Homo sapiens OX=9606 GN=IGH	30.8077	30.8077	33.1296	5	2	1	51	30.6	19.4	10.657	0	98.594	9397500000	41	51		98	2	A0A0B4J2B5;S4R460	A0A0B4J2B5;S4R460	1	2	5	1;1	2;1	5;4	True;False;True;False;False
Ig heavy chain V-I region HG3;Ig heavy chain V-I region EU	IGHV1-3;IGHV1-69-2	sp|P0DP01|HV108_HUMAN Immunoglobulin heavy variable 1-8 OS=Homo sapiens OX=9606 GN=IGHV1-8 PE=3 SV=1;sp|A0A0C4DH29|HV103_HUMAN Immunoglobulin heavy variable 1-3 OS=Homo sapiens OX=9606 GN=IGHV1-3 PE=3 SV=1;sp|A0A0B4J2H0|HV69D_HUMAN Immunoglobulin heavy var	24.3608	24.3608	26.9458	1	1	1	9.4	9.4	9.4	12.992	0	32.079	129270000	4	9.4		117	5	P0DP01;A0A0C4DH29;A0A0B4J2H0;P01743;P01742	P0DP01;A0A0C4DH29;A0A0B4J2H0;P01743;P01742	1	1	1	1;1;1;1;1	1;1;1;1;1	1;1;1;1;1	TRUE
Regulating synaptic membrane exocytosis protein 1	RIMS1	tr|H0YBE7|H0YBE7_HUMAN Regulating synaptic membrane exocytosis protein 1 (Fragment) OS=Homo sapiens OX=9606 GN=RIMS1 PE=1 SV=1;tr|A0A0C4DFV1|A0A0C4DFV1_HUMAN Regulating synaptic membrane exocytosis protein 1 (Fragment) OS=Homo sapiens OX=9606 GN=RIMS1 PE=1	18.2914	18.2914	23.2456	1	1	1	2.5	2.5	2.5	67.582	0.095082	0.65601	9945200	0	2.5		610	5	H0YBE7;A0A0C4DFV1;E5RGM0;H0YBU6;Q86UR5	H0YBE7;A0A0C4DFV1;E5RGM0;H0YBU6;Q86UR5	1	1	1	1;1;1;1;1	1;1;1;1;1	1;1;1;1;1	TRUE
Transmembrane protein 211	TMEM211	tr|A0A0C4DG04|A0A0C4DG04_HUMAN Transmembrane protein 211 OS=Homo sapiens OX=9606 GN=TMEM211 PE=4 SV=1;sp|Q6ICI0|TM211_HUMAN Transmembrane protein 211 OS=Homo sapiens OX=9606 GN=TMEM211 PE=2 SV=2	23.6795	23.6795	26.0014	1	1	1	26.4	26.4	26.4	13.941	0.095975	0.63352	67173000	0	26.4		129	2	A0A0C4DG04;Q6ICI0	A0A0C4DG04;Q6ICI0	1	1	1	1;1	1;1	1;1	TRUE
Actin-binding LIM protein 3	ABLIM3	tr|D6RHE7|D6RHE7_HUMAN Actin-binding LIM protein 3 OS=Homo sapiens OX=9606 GN=ABLIM3 PE=1 SV=1;tr|A0A0C4DGA7|A0A0C4DGA7_HUMAN Actin-binding LIM protein 3 OS=Homo sapiens OX=9606 GN=ABLIM3 PE=1 SV=1;sp|O94929|ABLM3_HUMAN Actin-binding LIM protein 3 OS=Homo	24.5751	24.5751	27.3825	1	1	1	9.9	9.9	9.9	16.907	0.090909	0.66679	174970000	1	9.9		151	3	D6RHE7;A0A0C4DGA7;O94929	D6RHE7;A0A0C4DGA7;O94929	1	1	1	1;1;1	1;1;1	1;1;1	TRUE
	IGKV6-21	sp|A0A0C4DH24|KV621_HUMAN Immunoglobulin kappa variable 6-21 OS=Homo sapiens OX=9606 GN=IGKV6-21 PE=3 SV=1	22.428	22.428	24.428	1	1	1	10.5	10.5	10.5	12.43	0	2.409	22572000	1	10.5	114	114	1	A0A0C4DH24	A0A0C4DH24	1	1	1	1	1	1	TRUE
	IGKV3D-20	sp|A0A0C4DH25|KVD20_HUMAN Immunoglobulin kappa variable 3D-20 OS=Homo sapiens OX=9606 GN=IGKV3D-20 PE=3 SV=1	26.4608	26.4608	28.7827	4	1	1	27.6	7.8	7.8	12.515	0.088136	0.66958	461800000	1	27.6	116	116	1	A0A0C4DH25	A0A0C4DH25	1	1	4	1	1	4	False;False;False;True
	IGHV3-16	tr|A0A0C4DH30|A0A0C4DH30_HUMAN Immunoglobulin heavy variable 3-16 (non-functional) (Fragment) OS=Homo sapiens OX=9606 GN=IGHV3-16 PE=1 SV=1	22.162	22.162	24.9694	1	1	1	17.1	17.1	17.1	13.07	0	1.9835	32850000	3	17.1	117	117	1	A0A0C4DH30	A0A0C4DH30	1	1	1	1	1	1	TRUE
Ig heavy chain V-I region V35	IGHV1-18	sp|A0A0C4DH31|HV118_HUMAN Immunoglobulin heavy variable 1-18 OS=Homo sapiens OX=9606 GN=IGHV1-18 PE=3 SV=1;sp|P23083|HV102_HUMAN Immunoglobulin heavy variable 1-2 OS=Homo sapiens OX=9606 GN=IGHV1-2 PE=1 SV=2	21.6297	21.6297	23.9516	2	2	2	23.9	23.9	23.9	12.82	0	22.819	16224000	5	23.9		117	2	A0A0C4DH31;P23083	A0A0C4DH31;P23083	2	2	2	2;1	2;1	2;1	True;True
	IGHV3-20	sp|A0A0C4DH32|HV320_HUMAN Immunoglobulin heavy variable 3-20 OS=Homo sapiens OX=9606 GN=IGHV3-20 PE=3 SV=2	25.843	25.843	28.4279	6	3	3	61.5	44.4	44.4	12.673	0	138.41	361130000	14	61.5	117	117	1	A0A0C4DH32	A0A0C4DH32	3	3	6	3	3	6	True;False;False;True;True;False
	IGHV3-35	tr|A0A0C4DH35|A0A0C4DH35_HUMAN Immunoglobulin heavy variable 3-35 (non-functional) (Fragment) OS=Homo sapiens OX=9606 GN=IGHV3-35 PE=1 SV=1	25.2191	25.2191	28.0264	2	2	2	16.2	16.2	16.2	12.81	0	17.739	273400000	7	16.2	117	117	1	A0A0C4DH35	A0A0C4DH35	2	2	2	2	2	2	True;True
	IGHV3-38	tr|A0A0C4DH36|A0A0C4DH36_HUMAN Immunoglobulin heavy variable 3-38 (non-functional) (Fragment) OS=Homo sapiens OX=9606 GN=IGHV3-38 PE=1 SV=1	27.1568	27.1568	29.7418	3	3	3	22.4	22.4	22.4	12.758	0	47.13	897790000	8	22.4	116	116	1	A0A0C4DH36	A0A0C4DH36	3	3	3	3	3	3	True;True;True
	IGHV5-51	sp|A0A0C4DH38|HV551_HUMAN Immunoglobulin heavy variable 5-51 OS=Homo sapiens OX=9606 GN=IGHV5-51 PE=3 SV=1;sp|A0A0J9YXX1|HV5X1_HUMAN Immunoglobulin heavy variable 5-10-1 OS=Homo sapiens OX=9606 GN=IGHV5-10-1 PE=3 SV=1	24.5136	24.5136	27.0986	4	4	4	47	47	47	12.674	0	31.977	143710000	11	47		117	2	A0A0C4DH38;A0A0J9YXX1	A0A0C4DH38;A0A0J9YXX1	4	4	4	4;2	4;2	4;2	True;True;True;True
Ig heavy chain V-II region NEWM;Ig heavy chain V-II region ARH-77;Ig heavy chain V-II region WAH	IGHV4-61	sp|P0DP08|HVD82_HUMAN Immunoglobulin heavy variable 4-38-2 OS=Homo sapiens OX=9606 GN=IGHV4-38-2 PE=3 SV=1;sp|P0DP06|HVD34_HUMAN Immunoglobulin heavy variable 4-30-4 OS=Homo sapiens OX=9606 GN=IGHV4-30-4 PE=3 SV=1;sp|A0A0C4DH41|HV461_HUMAN Immunoglobulin h	26.0724	26.0724	28.0724	3	3	3	26.5	26.5	26.5	13.016	0	100.53	282260000	12	26.5		117	11	P0DP08;P0DP06;A0A0C4DH41;P01825;P06331;P01824;A0A0J9YWU9;A0A087WW49;A0A075B6R2;P0DP07;A0A087WSY4	P0DP08;P0DP06;A0A0C4DH41;P01825;P06331;P01824;A0A0J9YWU9	3	3	3	3;3;3;3;3;3;2;1;1;1;1	3;3;3;3;3;3;2;1;1;1;1	3;3;3;3;3;3;2;1;1;1;1	True;True;True
	IGKV1-8;IGKV1-9	sp|A0A0C4DH67|KV108_HUMAN Immunoglobulin kappa variable 1-8 OS=Homo sapiens OX=9606 GN=IGKV1-8 PE=3 SV=1;sp|A0A0C4DH69|KV109_HUMAN Immunoglobulin kappa variable 1-9 OS=Homo sapiens OX=9606 GN=IGKV1-9 PE=3 SV=1	27.3663	27.3663	29.3663	3	3	2	42.6	42.6	28.7	12.537	0	82.742	692050000	22	42.6		115	2	A0A0C4DH67;A0A0C4DH69	A0A0C4DH67;A0A0C4DH69	2	3	3	2;1	3;2	3;2	True;True;True
	IGKV1-6	sp|A0A0C4DH72|KV106_HUMAN Immunoglobulin kappa variable 1-6 OS=Homo sapiens OX=9606 GN=IGKV1-6 PE=3 SV=1	27.7163	27.7163	29.7163	3	1	0	26.5	13.7	0	12.697	0	43.997	882060000	15	26.5	117	117	1	A0A0C4DH72	A0A0C4DH72	0	1	3	0	1	3	True;False;False
Ig kappa chain V-I region Wes	IGKV1-12	sp|A0A0C4DH73|KV112_HUMAN Immunoglobulin kappa variable 1-12 OS=Homo sapiens OX=9606 GN=IGKV1-12 PE=3 SV=1;sp|P01611|KVD12_HUMAN Immunoglobulin kappa variable 1D-12 OS=Homo sapiens OX=9606 GN=IGKV1D-12 PE=1 SV=2	24.0618	24.0618	26.0618	2	1	1	29.1	15.4	15.4	12.645	0	14.65	70047000	4	29.1		117	2	A0A0C4DH73;P01611	A0A0C4DH73;P01611	1	1	2	1;1	1;1	2;2	True;False
Solute carrier family 12 member 5	SLC12A5	tr|A0A0D9SF89|A0A0D9SF89_HUMAN Solute carrier family 12 member 5 OS=Homo sapiens OX=9606 GN=SLC12A5 PE=4 SV=1;tr|A0A0D9SGD0|A0A0D9SGD0_HUMAN HCG1821261 OS=Homo sapiens OX=9606 GN=SLC12A5 PE=4 SV=1;sp|Q9H2X9|S12A5_HUMAN Solute carrier family 12 member 5 OS=	24.1089	24.1089	26.4308	1	1	1	13.2	13.2	13.2	5.7874	0.043668	0.99218	90464000	1	13.2		53	3	A0A0D9SF89;A0A0D9SGD0;Q9H2X9	A0A0D9SF89;A0A0D9SGD0;Q9H2X9	1	1	1	1;1;1	1;1;1	1;1;1	TRUE
Ig alpha-2 chain C region	IGHA2	tr|A0A0G2JMB2|A0A0G2JMB2_HUMAN Immunoglobulin heavy constant alpha 2 (Fragment) OS=Homo sapiens OX=9606 GN=IGHA2 PE=1 SV=1;tr|A0A286YEY5|A0A286YEY5_HUMAN Immunoglobulin heavy constant alpha 2 (Fragment) OS=Homo sapiens OX=9606 GN=IGHA2 PE=1 SV=1;sp|P01877|	26.0369	26.0369	29.8443	19	4	4	73.2	30.9	30.9	36.508	0	165.42	963890000	30	73.2		340	3	A0A0G2JMB2;A0A286YEY5;P01877	A0A0G2JMB2;A0A286YEY5;P01877	4	4	19	4;3;3	4;3;3	19;13;13	True;True;False;False;False;True;False;False;True;False;False;False;False;False;False;False;False;False;False
		sp|A0A0G2JMI3|HV692_HUMAN Immunoglobulin heavy variable 1-69-2 OS=Homo sapiens OX=9606 GN=IGHV1-69-2 PE=3 SV=2	20.4948	20.4948	23.0798	1	1	1	17.1	17.1	17.1	12.87	0	2.1114	8865600	2	17.1	117	117	1	A0A0G2JMI3	A0A0G2JMI3	1	1	1	1	1	1	TRUE
Alpha-2-antiplasmin	SERPINF2	tr|A0A0G2JPA8|A0A0G2JPA8_HUMAN Alpha-2-antiplasmin OS=Homo sapiens OX=9606 GN=SERPINF2 PE=1 SV=1;sp|P08697|A2AP_HUMAN Alpha-2-antiplasmin OS=Homo sapiens OX=9606 GN=SERPINF2 PE=1 SV=3	21.2341	21.2341	25.1411	1	1	1	1.9	1.9	1.9	47.936	0	1.764	37001000	1	1.9		427	2	A0A0G2JPA8;P08697	A0A0G2JPA8;P08697	1	1	1	1;1	1;1	1;1	TRUE
Complement C4-A;Complement C4 beta chain;Complement C4-A alpha chain;C4a anaphylatoxin;C4b-A;C4d-A;Complement C4 gamma chain;Complement C4-B;Complement C4 beta chain;Complement C4-B alpha chain;C4a anaphylatoxin;C4b-B;C4d-B;Complement C4 gamma chain	C4A;C4B	tr|A0A140TA49|A0A140TA49_HUMAN Complement C4-A OS=Homo sapiens OX=9606 GN=C4A PE=1 SV=1;tr|A0A140TA44|A0A140TA44_HUMAN Complement C4-A OS=Homo sapiens OX=9606 GN=C4A PE=1 SV=1;tr|A0A140TA32|A0A140TA32_HUMAN Complement C4-A OS=Homo sapiens OX=9606 GN=C4A PE	20.0258	20.0258	26.2925	5	5	5	4.1	4.1	4.1	187.79	0	55.393	82195000	9	4.1		1698	12	A0A140TA49;A0A140TA44;A0A140TA32;A0A0G2JPR0;P0C0L4;A0A3B3ISA6;F5GXS0;A0A140TA29;A0A0G2JL54;P0C0L5;CON__P01030;CON__ENSEMBL:ENSBTAP00000007350	A0A140TA49;A0A140TA44;A0A140TA32;A0A0G2JPR0;P0C0L4;A0A3B3ISA6;F5GXS0;A0A140TA29;A0A0G2JL54;P0C0L5	5	5	5	5;5;5;5;5;4;4;4;4;4;1;1	5;5;5;5;5;4;4;4;4;4;1;1	5;5;5;5;5;4;4;4;4;4;1;1	True;True;True;True;True
		tr|A0A0G2JRQ6|A0A0G2JRQ6_HUMAN Uncharacterized protein (Fragment) OS=Homo sapiens OX=9606 PE=1 SV=4	25.783	25.783	28.1049	2	2	2	22.2	22.2	22.2	12.748	0	4.0848	288690000	3	22.2	117	117	1	A0A0G2JRQ6	A0A0G2JRQ6	2	2	2	2	2	2	True;True
	IGLV5-45	tr|A0A0G2JSC0|A0A0G2JSC0_HUMAN Immunoglobulin lambda variable 5-45 (Fragment) OS=Homo sapiens OX=9606 GN=IGLV5-45 PE=1 SV=1;sp|A0A087WSX0|LV545_HUMAN Immunoglobulin lambda variable 5-45 OS=Homo sapiens OX=9606 GN=IGLV5-45 PE=3 SV=1;sp|A0A0G2JS06|LV539_HUMA	25.3207	25.3207	26.9056	3	3	3	34.1	34.1	34.1	13.215	0	11.735	125720000	7	34.1		123	3	A0A0G2JSC0;A0A087WSX0;A0A0G2JS06	A0A0G2JSC0;A0A087WSX0;A0A0G2JS06	3	3	3	3;2;2	3;2;2	3;2;2	True;True;True
Stathmin-3	STMN3	tr|A0A0J9YXY4|A0A0J9YXY4_HUMAN Stathmin (Fragment) OS=Homo sapiens OX=9606 GN=STMN3 PE=1 SV=1;tr|A0A0J9YW36|A0A0J9YW36_HUMAN Stathmin-3 (Fragment) OS=Homo sapiens OX=9606 GN=STMN3 PE=1 SV=1;sp|Q9NZ72|STMN3_HUMAN Stathmin-3 OS=Homo sapiens OX=9606 GN=STMN3	20.9835	20.9835	23.3054	1	1	1	20.9	20.9	20.9	9.8041	0.048	0.86666	10366000	1	20.9		86	3	A0A0J9YXY4;A0A0J9YW36;Q9NZ72	A0A0J9YXY4;A0A0J9YW36;Q9NZ72	1	1	1	1;1;1	1;1;1	1;1;1	TRUE
		sp|A0A0J9YX35|HV64D_HUMAN Immunoglobulin heavy variable 3-64D OS=Homo sapiens OX=9606 GN=IGHV3-64D PE=3 SV=1	20.0987	20.0987	22.6837	2	1	1	25.6	16.2	16.2	12.822	0.05618	0.75454	6737100	0	25.6	117	117	1	A0A0J9YX35	A0A0J9YX35	1	1	2	1	1	2	False;True
Vitamin K-dependent protein S	PROS1	tr|G5E9F8|G5E9F8_HUMAN Vitamin K-dependent protein S OS=Homo sapiens OX=9606 GN=PROS1 PE=1 SV=2;tr|A0A3B3ISJ1|A0A3B3ISJ1_HUMAN Vitamin K-dependent protein S OS=Homo sapiens OX=9606 GN=PROS1 PE=1 SV=1;tr|A0A0S2Z4L3|A0A0S2Z4L3_HUMAN Protein S isoform 2 (Frag	21.5088	21.5088	26.2637	4	4	4	10	10	10	73.473	0	24.248	80567000	4	10		661	6	G5E9F8;A0A3B3ISJ1;A0A0S2Z4L3;P07225;A0A3B3IRK9;A0A3B3IUA6	G5E9F8;A0A3B3ISJ1;A0A0S2Z4L3;P07225;A0A3B3IRK9	4	4	4	4;4;4;4;3;1	4;4;4;4;3;1	4;4;4;4;3;1	True;True;True;True
RNA-binding motif protein, X-linked 2	RBMX2	tr|Q5JY83|Q5JY83_HUMAN RNA-binding motif protein, X-linked 2 OS=Homo sapiens OX=9606 GN=RBMX2 PE=1 SV=1;tr|A0A1W2PP04|A0A1W2PP04_HUMAN RNA-binding motif protein, X-linked 2 OS=Homo sapiens OX=9606 GN=RBMX2 PE=1 SV=1;sp|Q9Y388|RBMX2_HUMAN RNA-binding motif				1	1	1	29.3	29.3	29.3	6.6255	0.072727	0.71765	0	1	29.3		58	3	Q5JY83;A0A1W2PP04;Q9Y388	Q5JY83;A0A1W2PP04;Q9Y388	1	1	1	1;1;1	1;1;1	1;1;1	TRUE
40S ribosomal protein S10	RPS10	tr|A0A2R8Y6L3|A0A2R8Y6L3_HUMAN RPS10-NUDT3 readthrough (Fragment) OS=Homo sapiens OX=9606 GN=RPS10-NUDT3 PE=4 SV=1;tr|F6U211|F6U211_HUMAN 40S ribosomal protein S10 OS=Homo sapiens OX=9606 GN=RPS10 PE=4 SV=1;tr|A0A2R8Y7H1|A0A2R8Y7H1_HUMAN 40S ribosomal prot	19.8555	19.8555	22.8555	1	1	1	7.4	7.4	7.4	14.294	0	2.1189	7588900	1	7.4		121	6	A0A2R8Y6L3;F6U211;A0A2R8Y7H1;A0A2R8YFH6;A0A1W2PQS6;P46783	A0A2R8Y6L3;F6U211;A0A2R8Y7H1;A0A2R8YFH6;A0A1W2PQS6;P46783	1	1	1	1;1;1;1;1;1	1;1;1;1;1;1	1;1;1;1;1;1	TRUE
Ig gamma-3 chain C region	IGHG3	tr|A0A286YES1|A0A286YES1_HUMAN Immunoglobulin heavy constant gamma 3 (Fragment) OS=Homo sapiens OX=9606 GN=IGHG3 PE=1 SV=1;sp|P01860|IGHG3_HUMAN Immunoglobulin heavy constant gamma 3 OS=Homo sapiens OX=9606 GN=IGHG3 PE=1 SV=2	28.5509	28.5509	32.7989	22	8	8	48	26.5	26.5	49.021	0	280.65	7472000000	62	48		446	2	A0A286YES1;P01860	A0A286YES1;P01860	8	8	22	8;8	8;8	22;22	False;True;False;False;False;False;False;False;False;False;False;True;True;False;False;True;True;True;False;False;True;True
Ig gamma-2 chain C region	IGHG2	tr|A0A286YEY4|A0A286YEY4_HUMAN Immunoglobulin heavy constant gamma 2 (Fragment) OS=Homo sapiens OX=9606 GN=IGHG2 PE=1 SV=1;sp|P01859|IGHG2_HUMAN Immunoglobulin heavy constant gamma 2 OS=Homo sapiens OX=9606 GN=IGHG2 PE=1 SV=2	33.4471	33.4471	37.2545	23	23	10	52.4	52.4	33.4	43.805	0	323.31	163950000000	609	52.4		395	2	A0A286YEY4;P01859	A0A286YEY4;P01859	10	23	23	10;10	23;23	23;23	True;True;True;True;True;True;True;True;True;True;True;True;True;True;True;True;True;True;True;True;True;True;True
Ig gamma-4 chain C region	IGHG4	tr|A0A286YFJ8|A0A286YFJ8_HUMAN Immunoglobulin heavy constant gamma 4 (Fragment) OS=Homo sapiens OX=9606 GN=IGHG4 PE=1 SV=1;sp|P01861|IGHG4_HUMAN Immunoglobulin heavy constant gamma 4 OS=Homo sapiens OX=9606 GN=IGHG4 PE=1 SV=1	26.0437	26.0437	29.9506	14	6	6	42.9	21.7	21.7	43.831	0	64.511	1037600000	23	42.9		396	2	A0A286YFJ8;P01861	A0A286YFJ8;P01861	6	6	14	6;6	6;6	14;14	False;False;False;False;False;True;False;True;True;True;False;False;True;True
Ig kappa chain V-I region AU;Ig kappa chain V-I region AG		tr|A0A2Q2TTZ9|A0A2Q2TTZ9_HUMAN Immunoglobulin kappa variable 1-33 OS=Homo sapiens OX=9606 GN=IGKV1D-33 PE=1 SV=1;sp|P01594|KV133_HUMAN Immunoglobulin kappa variable 1-33 OS=Homo sapiens OX=9606 GN=IGKV1-33 PE=1 SV=2;sp|P01593|KVD33_HUMAN Immunoglobulin kap	29.3611	29.3611	31.3611	4	4	4	56.5	56.5	56.5	11.842	0	246.81	2758300000	36	56.5		108	3	A0A2Q2TTZ9;P01594;P01593	A0A2Q2TTZ9;P01594;P01593	4	4	4	4;3;3	4;3;3	4;3;3	True;True;True;True
DNA-binding protein RFX8	RFX8	tr|A0A2R8YED2|A0A2R8YED2_HUMAN DNA-binding protein RFX8 OS=Homo sapiens OX=9606 GN=RFX8 PE=4 SV=1;tr|A0A2R8Y560|A0A2R8Y560_HUMAN DNA-binding protein RFX8 OS=Homo sapiens OX=9606 GN=RFX8 PE=4 SV=1;sp|Q6ZV50|RFX8_HUMAN DNA-binding protein RFX8 OS=Homo sapien	19.2332	19.2332	23.9881	1	1	1	2.1	2.1	2.1	58.094	0.042918	0.96112	16639000	0	2.1		515	3	A0A2R8YED2;A0A2R8Y560;Q6ZV50	A0A2R8YED2;A0A2R8Y560;Q6ZV50	1	1	1	1;1;1	1;1;1	1;1;1	TRUE
Brain-specific angiogenesis inhibitor 1	ADGRB1;BAI1	tr|E5RG74|E5RG74_HUMAN Adhesion G protein-coupled receptor B1 OS=Homo sapiens OX=9606 GN=ADGRB1 PE=1 SV=1;tr|A0A2R8Y5M7|A0A2R8Y5M7_HUMAN Adhesion G protein-coupled receptor B1 OS=Homo sapiens OX=9606 GN=ADGRB1 PE=1 SV=1;sp|O14514|AGRB1_HUMAN Adhesion G pro	22.6594	22.6594	28.3318	1	1	1	0.9	0.9	0.9	126.69	0.042194	0.94241	337860000	1	0.9		1159	3	E5RG74;A0A2R8Y5M7;O14514	E5RG74;A0A2R8Y5M7;O14514	1	1	1	1;1;1	1;1;1	1;1;1	TRUE
Actin, aortic smooth muscle;POTE ankyrin domain family member F;POTE ankyrin domain family member I;Actin, alpha cardiac muscle 1;Actin, cytoplasmic 1;Actin, cytoplasmic 1, N-terminally processed;Actin, alpha skeletal muscle;Actin, gamma-enteric smooth muscle;Actin, cytoplasmic 2;Actin, cytoplasmic 2, N-terminally processed;POTE ankyrin domain family member E	ACTG2;ACTB;ACTA1;ACTG1;ACTA2;POTEF;POTEI;ACTC1;POTEE	tr|F8WCH0|F8WCH0_HUMAN Actin, gamma-enteric smooth muscle OS=Homo sapiens OX=9606 GN=ACTG2 PE=1 SV=1;tr|E7EVS6|E7EVS6_HUMAN Actin, cytoplasmic 1 (Fragment) OS=Homo sapiens OX=9606 GN=ACTB PE=1 SV=8;tr|A0A2R8Y793|A0A2R8Y793_HUMAN Actin, cytoplasmic 1 (Fragm	21.1181	21.1181	23.1181	1	1	1	21.2	21.2	21.2	5.5702	0.0093458	1.3455	9104300	2	21.2		52	29	F8WCH0;E7EVS6;A0A2R8Y793;A6NL76;I3L4N8;I3L1U9;I3L3I0;C9JTX5;A0A2R8YGF8;I3L3R2;J3KT65;F6QUT6;C9JFL5;K7EM38;G5E9R0;B8ZZJ2;F8WB63;C9JZR7;C9JUM1;F6UVQ4;P62736;A5A3E0;P0CG38;P68032;P60709;P68133;P63267;P63261;Q6S8J3	F8WCH0;E7EVS6;A0A2R8Y793;A6NL76;I3L4N8;I3L1U9;I3L3I0;C9JTX5;A0A2R8YGF8;I3L3R2;J3KT65;F6QUT6;C9JFL5;K7EM38;G5E9R0;B8ZZJ2;F8WB63;C9JZR7;C9JUM1;F6UVQ4;P62736;A5A3E0;P0CG38;P68032;P60709;P68133;P63267;P63261;Q6S8J3	1	1	1	1;1;1;1;1;1;1;1;1;1;1;1;1;1;1;1;1;1;1;1;1;1;1;1;1;1;1;1;1	1;1;1;1;1;1;1;1;1;1;1;1;1;1;1;1;1;1;1;1;1;1;1;1;1;1;1;1;1	1;1;1;1;1;1;1;1;1;1;1;1;1;1;1;1;1;1;1;1;1;1;1;1;1;1;1;1;1	TRUE
Homeobox protein cut-like 1	CUX1	tr|A0A2R8Y852|A0A2R8Y852_HUMAN Homeobox protein cut-like OS=Homo sapiens OX=9606 GN=CUX1 PE=1 SV=1;sp|P39880|CUX1_HUMAN Homeobox protein cut-like 1 OS=Homo sapiens OX=9606 GN=CUX1 PE=1 SV=3	20.9795	20.9795	27.0239	1	1	1	0.8	0.8	0.8	159.39	0.042017	0.94173	136460000	1	0.8		1460	2	A0A2R8Y852;P39880	A0A2R8Y852;P39880	1	1	1	1;1	1;1	1;1	TRUE
Uncharacterized protein C4orf29	C4orf29	tr|B7WP89|B7WP89_HUMAN Protein ABHD18 OS=Homo sapiens OX=9606 GN=ABHD18 PE=1 SV=1;tr|A0A2R8YEZ0|A0A2R8YEZ0_HUMAN Protein ABHD18 OS=Homo sapiens OX=9606 GN=ABHD18 PE=1 SV=1;sp|Q0P651|ABD18_HUMAN Protein ABHD18 OS=Homo sapiens OX=9606 GN=ABHD18 PE=2 SV=1	22.6393	22.6393	26.8873	1	1	1	2.4	2.4	2.4	43.353	0.093548	0.64488	124130000	2	2.4		382	3	B7WP89;A0A2R8YEZ0;Q0P651	B7WP89;A0A2R8YEZ0;Q0P651	1	1	1	1;1;1	1;1;1	1;1;1	TRUE
		tr|A0A2R8YG47|A0A2R8YG47_HUMAN Collagen alpha-1(IX) chain OS=Homo sapiens OX=9606 GN=COL9A1 PE=4 SV=1				1	1	1	42	42	42	11.03	0.083045	0.68635	0	1	42	112	112	1	A0A2R8YG47	A0A2R8YG47	1	1	1	1	1	1	TRUE
Complement factor H-related protein 2	CFHR2	tr|V9GYE7|V9GYE7_HUMAN Complement factor H-related protein 2 OS=Homo sapiens OX=9606 GN=CFHR2 PE=1 SV=1;tr|A0A3B3IQ51|A0A3B3IQ51_HUMAN Complement factor H-related protein 2 OS=Homo sapiens OX=9606 GN=CFHR2 PE=1 SV=1;sp|P36980|FHR2_HUMAN Complement factor H	20.2634	20.2634	24.1703	4	2	2	24.4	9.1	9.1	28.912	0	2.9834	18879000	2	24.4		254	7	V9GYE7;A0A3B3IQ51;P36980;A0A3B3ISW6;A0A3B3IRW0;A0A3B3IS00;A0A3B3IS28	V9GYE7;A0A3B3IQ51;P36980;A0A3B3ISW6;A0A3B3IRW0;A0A3B3IS00	2	2	4	2;2;2;2;1;1;1	2;2;2;2;1;1;1	4;4;4;3;2;2;1	True;False;True;False
		tr|A0A3B3ISW0|A0A3B3ISW0_HUMAN Calsyntenin-3 OS=Homo sapiens OX=9606 GN=CLSTN3 PE=1 SV=1;tr|A0A3B3IRF8|A0A3B3IRF8_HUMAN Calsyntenin-3 OS=Homo sapiens OX=9606 GN=CLSTN3 PE=1 SV=1	23.0785	23.0785	27.166	1	1	1	5.1	5.1	5.1	38.309	0.045267	0.89483	150590000	0	5.1		355	2	A0A3B3ISW0;A0A3B3IRF8	A0A3B3ISW0;A0A3B3IRF8	1	1	1	1;1	1;1	1;1	TRUE
Coiled-coil domain-containing protein 13	CCDC13	tr|A0A3B3IRZ5|A0A3B3IRZ5_HUMAN Uncharacterized protein OS=Homo sapiens OX=9606 PE=4 SV=1;sp|Q8IYE1|CCD13_HUMAN Coiled-coil domain-containing protein 13 OS=Homo sapiens OX=9606 GN=CCDC13 PE=1 SV=2	18.9732	18.9732	24.3307	1	1	1	1.6	1.6	1.6	83.762	0	2.891	21100000	1	1.6		738	2	A0A3B3IRZ5;Q8IYE1	A0A3B3IRZ5;Q8IYE1	1	1	1	1;1	1;1	1;1	TRUE
Complement C1r subcomponent;Complement C1r subcomponent heavy chain;Complement C1r subcomponent light chain	C1R	tr|A0A3B3ITU4|A0A3B3ITU4_HUMAN Complement C1r subcomponent (Fragment) OS=Homo sapiens OX=9606 GN=C1R PE=1 SV=1;tr|F5H2D0|F5H2D0_HUMAN Complement C1r subcomponent OS=Homo sapiens OX=9606 GN=C1R PE=1 SV=3;tr|A0A3B3ISR2|A0A3B3ISR2_HUMAN Complement C1r subcomp	22.2097	22.2097	26.2972	3	3	3	10	10	10	39.779	0	24.392	82460000	10	10		351	5	A0A3B3ITU4;F5H2D0;A0A3B3ISR2;B4DPQ0;P00736	A0A3B3ITU4;F5H2D0;A0A3B3ISR2;B4DPQ0;P00736	3	3	3	3;3;3;3;3	3;3;3;3;3	3;3;3;3;3	True;True;True
Programmed cell death 6-interacting protein	PDCD6IP	tr|A0A3B3IT07|A0A3B3IT07_HUMAN Programmed cell death 6-interacting protein OS=Homo sapiens OX=9606 GN=PDCD6IP PE=1 SV=1;sp|Q8WUM4|PDC6I_HUMAN Programmed cell death 6-interacting protein OS=Homo sapiens OX=9606 GN=PDCD6IP PE=1 SV=1	17.7466	17.7466	21.9946	1	1	1	6.7	6.7	6.7	32.916	0.095238	0.6396	4178600	0	6.7		300	2	A0A3B3IT07;Q8WUM4	A0A3B3IT07;Q8WUM4	1	1	1	1;1	1;1	1;1	TRUE
Protein FAM27E3	FAM27E3	tr|A0A494C193|A0A494C193_HUMAN Uncharacterized protein OS=Homo sapiens OX=9606 PE=4 SV=1;sp|Q08E93|F27E3_HUMAN Protein FAM27E3 OS=Homo sapiens OX=9606 GN=FAM27E3 PE=1 SV=1	22.2092	22.2092	24.7942	1	1	1	8.8	8.8	8.8	13.511	0.045833	0.91904	29093000	1	8.8		113	2	A0A494C193;Q08E93	A0A494C193;Q08E93	1	1	1	1;1	1;1	1;1	TRUE
Ig lambda-7 chain C region	IGLC7	sp|A0M8Q6|IGLC7_HUMAN Immunoglobulin lambda constant 7 OS=Homo sapiens OX=9606 GN=IGLC7 PE=1 SV=3	23.112	23.112	25.9194	8	3	2	72.6	26.4	18.9	11.253	0	7.6012	63461000	4	72.6	106	106	1	A0M8Q6	A0M8Q6	2	3	8	2	3	8	False;False;False;True;True;True;False;False
Putative prolyl-tRNA synthetase associated domain-containing protein 1	PRORSD1P	sp|A6NEY8|PRXD1_HUMAN Putative prolyl-tRNA synthetase associated domain-containing protein 1 OS=Homo sapiens OX=9606 GN=PRORSD1P PE=5 SV=3	20.6361	20.6361	23.958	1	1	1	7.1	7.1	7.1	18.657	0.043103	0.972	16296000	2	7.1	169	169	1	A6NEY8	A6NEY8	1	1	1	1	1	1	TRUE
RanBP-type and C3HC4-type zinc finger-containing protein 1	RBCK1	tr|A6PVK0|A6PVK0_HUMAN HCG2019817, isoform CRA_b OS=Homo sapiens OX=9606 GN=RBCK1 PE=1 SV=1;sp|Q9BYM8|HOIL1_HUMAN RanBP-type and C3HC4-type zinc finger-containing protein 1 OS=Homo sapiens OX=9606 GN=RBCK1 PE=1 SV=2	17.3491	17.3491	21.8085	1	1	1	9.1	9.1	9.1	37.428	0.097484	0.63736	3672800	0	9.1		340	2	A6PVK0;Q9BYM8	A6PVK0;Q9BYM8	1	1	1	1;1	1;1	1;1	TRUE
Insulin-like growth factor-binding protein 3	IGFBP3	tr|C9JMX4|C9JMX4_HUMAN Insulin-like growth factor-binding protein 3 (Fragment) OS=Homo sapiens OX=9606 GN=IGFBP3 PE=1 SV=1;tr|H0Y485|H0Y485_HUMAN Insulin-like growth factor-binding protein 3 (Fragment) OS=Homo sapiens OX=9606 GN=IGFBP3 PE=1 SV=1;tr|H0Y5K2|	21.9396	21.9396	25.2615	3	3	3	20.5	20.5	20.5	14.9	0	4.2407	40222000	6	20.5		132	7	C9JMX4;H0Y485;H0Y5K2;B3KWK7;A6XND1;A6XND0;P17936	C9JMX4;H0Y485;H0Y5K2;B3KWK7;A6XND1;A6XND0;P17936	3	3	3	3;3;3;3;3;3;3	3;3;3;3;3;3;3	3;3;3;3;3;3;3	True;True;True
Uncharacterized protein KIAA0930	KIAA0930	tr|B0QY16|B0QY16_HUMAN Uncharacterized protein KIAA0930 (Fragment) OS=Homo sapiens OX=9606 GN=KIAA0930 PE=1 SV=1;sp|Q6ICG6|K0930_HUMAN Uncharacterized protein KIAA0930 OS=Homo sapiens OX=9606 GN=KIAA0930 PE=1 SV=1	21.8462	21.8462	25.8462	1	1	1	4.8	4.8	4.8	32.451	0.083333	0.68691	60323000	1	4.8		289	2	B0QY16;Q6ICG6	B0QY16;Q6ICG6	1	1	1	1;1	1;1	1;1	TRUE
Apolipoprotein C-III	APOC3	tr|B0YIW2|B0YIW2_HUMAN Apolipoprotein C-III OS=Homo sapiens OX=9606 GN=APOC3 PE=1 SV=1;sp|P02656|APOC3_HUMAN Apolipoprotein C-III OS=Homo sapiens OX=9606 GN=APOC3 PE=1 SV=1	26.4719	26.4719	29.2793	5	5	5	30.8	30.8	30.8	12.815	0	125.67	651550000	12	30.8		117	2	B0YIW2;P02656	B0YIW2;P02656	5	5	5	5;5	5;5	5;5	True;True;True;True;True
Histone H3;Histone H3.2;Histone H3.1t;Histone H3.3;Histone H3.1	H3F3B;H3F3A;HIST2H3A;HIST3H3;HIST1H3A	tr|K7EMV3|K7EMV3_HUMAN Histone H3 OS=Homo sapiens OX=9606 GN=H3F3B PE=1 SV=1;tr|B4DEB1|B4DEB1_HUMAN Histone H3 OS=Homo sapiens OX=9606 GN=H3F3A PE=1 SV=1;tr|K7EK07|K7EK07_HUMAN Histone H3 (Fragment) OS=Homo sapiens OX=9606 GN=H3F3B PE=1 SV=1;tr|K7ES00|K7ES	20.2123	20.2123	22.5342	1	1	1	12	12	12	10.334	0.056818	0.75828	6074000	0	12		92	8	K7EMV3;B4DEB1;K7EK07;K7ES00;Q71DI3;Q16695;P84243;P68431	K7EMV3;B4DEB1;K7EK07;K7ES00;Q71DI3;Q16695;P84243;P68431	1	1	1	1;1;1;1;1;1;1;1	1;1;1;1;1;1;1;1	1;1;1;1;1;1;1;1	TRUE
Multidrug resistance-associated protein 9	ABCC12	tr|E9PHY2|E9PHY2_HUMAN Multidrug resistance-associated protein 9 (Fragment) OS=Homo sapiens OX=9606 GN=ABCC12 PE=4 SV=1;tr|B4DYN2|B4DYN2_HUMAN Multidrug resistance-associated protein 9 OS=Homo sapiens OX=9606 GN=ABCC12 PE=2 SV=1;sp|Q96J65|MRP9_HUMAN Multid	26.2963	26.2963	28.6182	1	1	1	13.2	13.2	13.2	12.003	0.10272	0.62956	412030000	1	13.2		106	3	E9PHY2;B4DYN2;Q96J65	E9PHY2;B4DYN2;Q96J65	1	1	1	1;1;1	1;1;1	1;1;1	TRUE
Complement factor B;Complement factor B Ba fragment;Complement factor B Bb fragment	CFB	tr|B4E1Z4|B4E1Z4_HUMAN cDNA FLJ55673, highly similar to Complement factor B OS=Homo sapiens OX=9606 PE=1 SV=1;sp|P00751|CFAB_HUMAN Complement factor B OS=Homo sapiens OX=9606 GN=CFB PE=1 SV=2;tr|E7ETN3|E7ETN3_HUMAN Uncharacterized protein OS=Homo sapiens O	21.0589	21.0589	27.0813	9	9	9	10.4	10.4	10.4	140.94	0	23.631	142000000	16	10.4		1266	7	B4E1Z4;P00751;E7ETN3;A0A0G2JH38;H7C5H1;H7C526;C9JRT3	B4E1Z4;P00751;E7ETN3;A0A0G2JH38	9	9	9	9;9;8;6;3;1;1	9;9;8;6;3;1;1	9;9;8;6;3;1;1	True;True;True;True;True;True;True;True;True
Interleukin-6	IL6	tr|C9J5B0|C9J5B0_HUMAN Interleukin-6 (Fragment) OS=Homo sapiens OX=9606 GN=IL6 PE=1 SV=1;tr|B5MCZ3|B5MCZ3_HUMAN Interleukin-6 OS=Homo sapiens OX=9606 GN=IL6 PE=1 SV=1;tr|B5MC14|B5MC14_HUMAN Interleukin-6 OS=Homo sapiens OX=9606 GN=IL6 PE=1 SV=1;sp|P05231|I				1	1	1	7.2	7.2	7.2	16.791	0.094156	0.64633	0	1	7.2		152	4	C9J5B0;B5MCZ3;B5MC14;P05231	C9J5B0;B5MCZ3;B5MC14;P05231	1	1	1	1;1;1;1	1;1;1;1	1;1;1;1	TRUE
	ITIH4	tr|B7ZKJ8|B7ZKJ8_HUMAN ITIH4 protein OS=Homo sapiens OX=9606 GN=ITIH4 PE=1 SV=1;tr|H7C0L5|H7C0L5_HUMAN Inter-alpha-trypsin inhibitor heavy chain H4 (Fragment) OS=Homo sapiens OX=9606 GN=ITIH4 PE=1 SV=1	24.2905	24.2905	29.7499	14	14	1	20.3	20.3	1.7	103.88	0	59.605	902850000	30	20.3		935	3	B7ZKJ8;H7C0L5;CON__Q3T052	B7ZKJ8;H7C0L5	1	14	14	1;0;0	14;10;1	14;10;1	True;True;True;True;True;True;True;True;True;True;True;True;True;True
Prothymosin alpha;Prothymosin alpha, N-terminally processed;Thymosin alpha-1	PTMA	tr|B8ZZQ6|B8ZZQ6_HUMAN Prothymosin alpha OS=Homo sapiens OX=9606 GN=PTMA PE=1 SV=1;sp|P06454|PTMA_HUMAN Prothymosin alpha OS=Homo sapiens OX=9606 GN=PTMA PE=1 SV=2	21.5677	21.5677	23.1527	1	1	1	13.1	13.1	13.1	11.758	0	5.4335	9325300	3	13.1		107	2	B8ZZQ6;P06454	B8ZZQ6;P06454	1	1	1	1;1	1;1	1;1	TRUE
Structural maintenance of chromosomes protein;Structural maintenance of chromosomes protein 4	SMC4	tr|F8WCB7|F8WCB7_HUMAN Structural maintenance of chromosomes protein 4 OS=Homo sapiens OX=9606 GN=SMC4 PE=1 SV=1;tr|C9JWF0|C9JWF0_HUMAN Structural maintenance of chromosomes protein 4 (Fragment) OS=Homo sapiens OX=9606 GN=SMC4 PE=1 SV=1;tr|C9IYK2|C9IYK2_HU	25.1779	25.1779	26.7629	1	1	1	18	18	18	5.1695	0.10092	0.63056	113880000	0	18		50	7	F8WCB7;C9JWF0;C9IYK2;C9JJ64;C9JR83;E9PD53;Q9NTJ3	F8WCB7;C9JWF0;C9IYK2;C9JJ64;C9JR83;E9PD53;Q9NTJ3	1	1	1	1;1;1;1;1;1;1	1;1;1;1;1;1;1	1;1;1;1;1;1;1	TRUE
Tyrosine-protein kinase receptor;Insulin-like growth factor 1 receptor;Insulin-like growth factor 1 receptor alpha chain;Insulin-like growth factor 1 receptor beta chain	IGF1R	tr|C9J5X1|C9J5X1_HUMAN Tyrosine-protein kinase receptor OS=Homo sapiens OX=9606 GN=IGF1R PE=1 SV=1;sp|P08069|IGF1R_HUMAN Insulin-like growth factor 1 receptor OS=Homo sapiens OX=9606 GN=IGF1R PE=1 SV=1	19.7553	19.7553	25.7553	1	1	1	1	1	1	154.79	0.085616	0.67387	56641000	2	1		1366	2	C9J5X1;P08069	C9J5X1;P08069	1	1	1	1;1	1;1	1;1	TRUE
Fibrinogen gamma chain	FGG	tr|C9JEU5|C9JEU5_HUMAN Fibrinogen gamma chain OS=Homo sapiens OX=9606 GN=FGG PE=1 SV=1;tr|C9JC84|C9JC84_HUMAN Fibrinogen gamma chain OS=Homo sapiens OX=9606 GN=FGG PE=1 SV=1;sp|P02679|FIBG_HUMAN Fibrinogen gamma chain OS=Homo sapiens OX=9606 GN=FGG PE=1 SV	23.8728	23.8728	28.5733	6	6	6	19.1	19.1	19.1	50.322	0	50.6	399400000	11	19.1		445	5	C9JEU5;C9JC84;P02679;C9JPQ9;C9JU00	C9JEU5;C9JC84;P02679	6	6	6	6;6;6;2;2	6;6;6;2;2	6;6;6;2;2	True;True;True;True;True;True
Apolipoprotein D	APOD	tr|C9JF17|C9JF17_HUMAN Apolipoprotein D (Fragment) OS=Homo sapiens OX=9606 GN=APOD PE=1 SV=1;sp|P05090|APOD_HUMAN Apolipoprotein D OS=Homo sapiens OX=9606 GN=APOD PE=1 SV=1	22.7837	22.7837	26.2431	4	4	4	16.7	16.7	16.7	24.158	0	37.113	79425000	4	16.7		215	2	C9JF17;P05090	C9JF17;P05090	4	4	4	4;4	4;4	4;4	True;True;True;True
Nucleobindin-1	NUCB1	tr|C9JKZ2|C9JKZ2_HUMAN Nucleobindin-1 (Fragment) OS=Homo sapiens OX=9606 GN=NUCB1 PE=1 SV=8;tr|H7BZI1|H7BZI1_HUMAN Nucleobindin-1 (Fragment) OS=Homo sapiens OX=9606 GN=NUCB1 PE=1 SV=1;sp|Q02818|NUCB1_HUMAN Nucleobindin-1 OS=Homo sapiens OX=9606 GN=NUCB1 PE	24.9054	24.9054	28.9054	2	2	2	4.5	4.5	4.5	31.066	0	1.6688	502800000	7	4.5		267	3	C9JKZ2;H7BZI1;Q02818	C9JKZ2;H7BZI1;Q02818	2	2	2	2;2;2	2;2;2	2;2;2	True;True
Insulin-like growth factor-binding protein 2	IGFBP2	tr|C9JMY1|C9JMY1_HUMAN Insulin-like growth factor-binding protein 2 OS=Homo sapiens OX=9606 GN=IGFBP2 PE=1 SV=1;sp|P18065|IBP2_HUMAN Insulin-like growth factor-binding protein 2 OS=Homo sapiens OX=9606 GN=IGFBP2 PE=1 SV=2				1	1	1	5	5	5	20.281	0.042735	0.95876	0	1	5		181	2	C9JMY1;P18065	C9JMY1;P18065	1	1	1	1;1	1;1	1;1	TRUE
Heat shock factor 2-binding protein	HSF2BP	tr|C9JSF2|C9JSF2_HUMAN Heat shock factor 2-binding protein (Fragment) OS=Homo sapiens OX=9606 GN=HSF2BP PE=1 SV=8;sp|O75031|HSF2B_HUMAN Heat shock factor 2-binding protein OS=Homo sapiens OX=9606 GN=HSF2BP PE=1 SV=1	25.7988	25.7988	29.2583	1	1	1	4.4	4.4	4.4	25.387	0.10119	0.62755	642110000	1	4.4		226	2	C9JSF2;O75031	C9JSF2;O75031	1	1	1	1;1	1;1	1;1	TRUE
Alpha-2-HS-glycoprotein;Alpha-2-HS-glycoprotein chain A;Alpha-2-HS-glycoprotein chain B	AHSG	tr|C9JV77|C9JV77_HUMAN Alpha-2-HS-glycoprotein OS=Homo sapiens OX=9606 GN=AHSG PE=1 SV=1;sp|P02765|FETUA_HUMAN Alpha-2-HS-glycoprotein OS=Homo sapiens OX=9606 GN=AHSG PE=1 SV=2	21.5321	21.5321	25.2326	4	4	3	9.2	9.2	7.3	39.411	0	9.8365	39424000	5	9.2		368	2	C9JV77;P02765	C9JV77;P02765	3	4	4	3;3	4;4	4;4	True;True;True;True
Protein-tyrosine-phosphatase;Tyrosine-protein phosphatase non-receptor type;Tyrosine-protein phosphatase non-receptor type 2	PTPN2	tr|D3DUJ3|D3DUJ3_HUMAN Protein tyrosine phosphatase, non-receptor type 2, isoform CRA_d OS=Homo sapiens OX=9606 GN=PTPN2 PE=1 SV=1;tr|K7EQG9|K7EQG9_HUMAN Tyrosine-protein phosphatase non-receptor type OS=Homo sapiens OX=9606 GN=PTPN2 PE=1 SV=1;sp|P17706|PT	22.1307	22.1307	26.3786	1	1	1	5.1	5.1	5.1	36.455	0.087838	0.66829	87249000	0	5.1		316	3	D3DUJ3;K7EQG9;P17706	D3DUJ3;K7EQG9;P17706	1	1	1	1;1;1	1;1;1	1;1;1	TRUE
Complement C1q subcomponent subunit B	C1QB	tr|D6R934|D6R934_HUMAN Complement C1q subcomponent subunit B OS=Homo sapiens OX=9606 GN=C1QB PE=1 SV=1;sp|P02746|C1QB_HUMAN Complement C1q subcomponent subunit B OS=Homo sapiens OX=9606 GN=C1QB PE=1 SV=3;tr|A0A0A0MSV6|A0A0A0MSV6_HUMAN Complement C1q subcom	24.2307	24.2307	27.8157	6	6	6	35.5	35.5	35.5	26.459	0	28.872	236250000	9	35.5		251	4	D6R934;P02746;A0A0A0MSV6;D6RGJ1	D6R934;P02746;A0A0A0MSV6	6	6	6	6;6;5;1	6;6;5;1	6;6;5;1	True;True;True;True;True;True
Vitamin D-binding protein	GC	tr|D6RF35|D6RF35_HUMAN Vitamin D-binding protein OS=Homo sapiens OX=9606 GN=GC PE=1 SV=1;sp|P02774|VTDB_HUMAN Vitamin D-binding protein OS=Homo sapiens OX=9606 GN=GC PE=1 SV=2;tr|D6RBJ7|D6RBJ7_HUMAN Vitamin D-binding protein OS=Homo sapiens OX=9606 GN=GC P	25.1894	25.1894	30.0474	21	21	21	52.5	52.5	52.5	53.02	0	323.31	1109600000	43	52.5		476	6	D6RF35;P02774;D6RBJ7;D6RF20;CON__Q3MHN5;CON__ENSEMBL:ENSBTAP00000018229	D6RF35;P02774;D6RBJ7	21	21	21	21;21;13;3;3;3	21;21;13;3;3;3	21;21;13;3;3;3	True;True;True;True;True;True;True;True;True;True;True;True;True;True;True;True;True;True;True;True;True
Pulmonary surfactant-associated protein B	SFTPB	tr|D6W5L6|D6W5L6_HUMAN Pulmonary surfactant-associated protein B OS=Homo sapiens OX=9606 GN=SFTPB PE=1 SV=1;sp|P07988|PSPB_HUMAN Pulmonary surfactant-associated protein B OS=Homo sapiens OX=9606 GN=SFTPB PE=1 SV=3;tr|H0Y7V6|H0Y7V6_HUMAN Pulmonary surfactan	24.8183	24.8183	28.6257	11	11	11	31.6	31.6	31.6	43.346	0	106.56	414180000	15	31.6		393	4	D6W5L6;P07988;H0Y7V6;U3KQT2	D6W5L6;P07988;H0Y7V6	11	11	11	11;11;10;1	11;11;10;1	11;11;10;1	True;True;True;True;True;True;True;True;True;True;True
Ceruloplasmin	CP	tr|E9PFZ2|E9PFZ2_HUMAN Ceruloplasmin OS=Homo sapiens OX=9606 GN=CP PE=1 SV=1;sp|P00450|CERU_HUMAN Ceruloplasmin OS=Homo sapiens OX=9606 GN=CP PE=1 SV=1	20.3854	20.3854	25.8773	7	7	7	11.4	11.4	11.4	108.82	0	18.472	61636000	6	11.4		946	6	E9PFZ2;P00450;D6RE86;H7C5R1;H7C5N5;CON__ENSEMBL:ENSBTAP00000031900	E9PFZ2;P00450	7	7	7	7;7;3;3;1;1	7;7;3;3;1;1	7;7;3;3;1;1	True;True;True;True;True;True;True
Prothrombin;Activation peptide fragment 1;Activation peptide fragment 2;Thrombin light chain;Thrombin heavy chain	F2	tr|E9PIT3|E9PIT3_HUMAN Prothrombin OS=Homo sapiens OX=9606 GN=F2 PE=1 SV=1;sp|P00734|THRB_HUMAN Prothrombin OS=Homo sapiens OX=9606 GN=F2 PE=1 SV=2;tr|C9JV37|C9JV37_HUMAN Prothrombin (Fragment) OS=Homo sapiens OX=9606 GN=F2 PE=1 SV=1	20.9923	20.9923	25.8992	7	7	7	22.5	22.5	22.5	65.408	0	31.925	62580000	10	22.5		583	4	E9PIT3;P00734;C9JV37;CON__P00735	E9PIT3;P00734;C9JV37	7	7	7	7;7;5;1	7;7;5;1	7;7;5;1	True;True;True;True;True;True;True
Ferritin;Ferritin heavy chain;Ferritin heavy chain, N-terminally processed	FTH1	tr|E9PQR3|E9PQR3_HUMAN Ferritin OS=Homo sapiens OX=9606 GN=FTH1 PE=1 SV=1;tr|E9PKM5|E9PKM5_HUMAN Ferritin heavy chain OS=Homo sapiens OX=9606 GN=FTH1 PE=1 SV=1;tr|E9PRK8|E9PRK8_HUMAN Ferritin OS=Homo sapiens OX=9606 GN=FTH1 PE=1 SV=1;tr|E9PK45|E9PK45_HUMAN	20.574	20.574	22.159	1	1	1	18	18	18	5.6423	0.031532	1.1018	4683000	1	18		50	6	E9PQR3;E9PKM5;E9PRK8;E9PK45;E9PKY7;P02794	E9PQR3;E9PKM5;E9PRK8;E9PK45;E9PKY7;P02794	1	1	1	1;1;1;1;1;1	1;1;1;1;1;1	1;1;1;1;1;1	TRUE
Midkine	MDK	tr|E9PPJ5|E9PPJ5_HUMAN Midkine (Fragment) OS=Homo sapiens OX=9606 GN=MDK PE=1 SV=1;tr|E9PLM6|E9PLM6_HUMAN Midkine OS=Homo sapiens OX=9606 GN=MDK PE=1 SV=1;sp|P21741|MK_HUMAN Midkine OS=Homo sapiens OX=9606 GN=MDK PE=1 SV=1	21.0083	21.0083	24.0084	1	1	1	7.6	7.6	7.6	14.374	0	22.905	16875000	2	7.6		131	3	E9PPJ5;E9PLM6;P21741	E9PPJ5;E9PLM6;P21741	1	1	1	1;1;1	1;1;1	1;1;1	TRUE
Galactosylgalactosylxylosylprotein 3-beta-glucuronosyltransferase 3	B3GAT3	tr|E9PNA1|E9PNA1_HUMAN Galactosylgalactosylxylosylprotein 3-beta-glucuronosyltransferase (Fragment) OS=Homo sapiens OX=9606 GN=B3GAT3 PE=1 SV=1;tr|G3V150|G3V150_HUMAN Galactosylgalactosylxylosylprotein 3-beta-glucuronosyltransferase OS=Homo sapiens OX=9606	24.8323	24.8323	28.1543	1	1	1	3.1	3.1	3.1	24.482	0.0048077	1.4415	298730000	4	3.1		223	4	E9PNA1;G3V150;REV__Q9BRK4;O94766	E9PNA1;G3V150;REV__Q9BRK4;O94766	1	1	1	1;1;1;1	1;1;1;1	1;1;1;1	TRUE
	AP2A2	tr|E9PPZ3|E9PPZ3_HUMAN AP-2 complex subunit alpha-2 (Fragment) OS=Homo sapiens OX=9606 GN=AP2A2 PE=4 SV=1;tr|E9PS94|E9PS94_HUMAN AP-2 complex subunit alpha-2 (Fragment) OS=Homo sapiens OX=9606 GN=AP2A2 PE=4 SV=1;tr|E9PQP4|E9PQP4_HUMAN AP-2 complex subunit	22.7086	22.7086	24.7086	1	1	1	25	25	25	6.6957	0.031674	1.113	27418000	1	25		60	3	E9PPZ3;E9PS94;E9PQP4	E9PPZ3;E9PS94;E9PQP4	1	1	1	1;1;1	1;1;1	1;1;1	TRUE
40S ribosomal protein S13	RPS13	tr|E9PS50|E9PS50_HUMAN 40S ribosomal protein S13 (Fragment) OS=Homo sapiens OX=9606 GN=RPS13 PE=1 SV=1;tr|J3KMX5|J3KMX5_HUMAN 40S ribosomal protein S13 OS=Homo sapiens OX=9606 GN=RPS13 PE=1 SV=1;sp|P62277|RS13_HUMAN 40S ribosomal protein S13 OS=Homo sapien	20.7515	20.7515	22.7515	1	1	1	10.3	10.3	10.3	12.459	0	1.7257	7061200	1	10.3		116	3	E9PS50;J3KMX5;P62277	E9PS50;J3KMX5;P62277	1	1	1	1;1;1	1;1;1	1;1;1	TRUE
Complement component C8 beta chain	C8B	tr|F5GY80|F5GY80_HUMAN Complement component C8 beta chain OS=Homo sapiens OX=9606 GN=C8B PE=1 SV=1;tr|F5H7G1|F5H7G1_HUMAN Complement component C8 beta chain OS=Homo sapiens OX=9606 GN=C8B PE=1 SV=1;sp|P07358|CO8B_HUMAN Complement component C8 beta chain OS	17.3415	17.3415	22.0965	1	1	1	2.1	2.1	2.1	60.04	0.076087	0.71116	4484300	1	2.1		529	3	F5GY80;F5H7G1;P07358	F5GY80;F5H7G1;P07358	1	1	1	1;1;1	1;1;1	1;1;1	TRUE
DNA ligase;DNA ligase 1	LIG1	tr|M0R0Q7|M0R0Q7_HUMAN DNA ligase OS=Homo sapiens OX=9606 GN=LIG1 PE=1 SV=1;tr|F5GZ28|F5GZ28_HUMAN DNA ligase OS=Homo sapiens OX=9606 GN=LIG1 PE=1 SV=1;sp|P18858|DNLI1_HUMAN DNA ligase 1 OS=Homo sapiens OX=9606 GN=LIG1 PE=1 SV=1	19.9268	19.9268	25.2844	1	1	1	1.4	1.4	1.4	88.386	0.027397	1.1419	40865000	2	1.4		800	3	M0R0Q7;F5GZ28;P18858	M0R0Q7;F5GZ28;P18858	1	1	1	1;1;1	1;1;1	1;1;1	TRUE
	CCDC74A	tr|F5GZA4|F5GZA4_HUMAN Coiled-coil domain-containing protein 74A OS=Homo sapiens OX=9606 GN=CCDC74A PE=1 SV=2	17.4983	17.4983	21.4983	1	1	1	12.5	12.5	12.5	29.506	0.095395	0.65657	2962400	1	12.5	272	272	1	F5GZA4	F5GZA4	1	1	1	1	1	1	TRUE
PCTP-like protein	STARD10	tr|F5H5A8|F5H5A8_HUMAN START domain-containing protein 10 (Fragment) OS=Homo sapiens OX=9606 GN=STARD10 PE=1 SV=1;tr|F5H3G8|F5H3G8_HUMAN START domain-containing protein 10 (Fragment) OS=Homo sapiens OX=9606 GN=STARD10 PE=1 SV=1;tr|F5H0V7|F5H0V7_HUMAN START	23.7448	23.7448	26.0668	1	1	1	15.7	15.7	15.7	10.127	0.078853	0.70699	70287000	1	15.7		89	6	F5H5A8;F5H3G8;F5H0V7;F5H8G1;F5H1Z6;Q9Y365	F5H5A8;F5H3G8;F5H0V7;F5H8G1;F5H1Z6;Q9Y365	1	1	1	1;1;1;1;1;1	1;1;1;1;1;1	1;1;1;1;1;1	TRUE
Low-density lipoprotein receptor-related protein 6	LRP6	tr|H0YGW5|H0YGW5_HUMAN Low-density lipoprotein receptor-related protein 6 (Fragment) OS=Homo sapiens OX=9606 GN=LRP6 PE=1 SV=1;tr|F5H7J9|F5H7J9_HUMAN Low-density lipoprotein receptor-related protein OS=Homo sapiens OX=9606 GN=LRP6 PE=1 SV=1;sp|O75581|LRP6_	17.3494	17.3494	23.4154	1	1	1	0.7	0.7	0.7	165.38	0.079137	0.70805	11188000	0	0.7		1478	3	H0YGW5;F5H7J9;O75581	H0YGW5;F5H7J9;O75581	1	1	1	1;1;1	1;1;1	1;1;1	TRUE
	SHISA5	tr|F8WCE2|F8WCE2_HUMAN Protein shisa-5 OS=Homo sapiens OX=9606 GN=SHISA5 PE=4 SV=1	22.1152	22.1152	23.1152	1	1	1	70.5	70.5	70.5	6.2856	0.096667	0.66133	9085900	0	70.5	61	61	1	F8WCE2	F8WCE2	1	1	1	1	1	1	TRUE
	HBA2	tr|G3V1N2|G3V1N2_HUMAN HCG1745306, isoform CRA_a OS=Homo sapiens OX=9606 GN=HBA2 PE=1 SV=1	20.513	20.513	23.0979	1	1	1	7.3	7.3	7.3	11.948	0.045082	0.89243	8977800	1	7.3	110	110	1	G3V1N2	G3V1N2	1	1	1	1	1	1	TRUE
Serine/threonine-protein kinase TAO3	TAOK3	tr|G3V1Q8|G3V1Q8_HUMAN Serine/threonine-protein kinase TAO3 OS=Homo sapiens OX=9606 GN=TAOK3 PE=1 SV=1;sp|Q9H2K8|TAOK3_HUMAN Serine/threonine-protein kinase TAO3 OS=Homo sapiens OX=9606 GN=TAOK3 PE=1 SV=2				1	1	1	2.3	2.3	2.3	53.103	0.056604	0.75758	0	1	2.3		438	2	G3V1Q8;Q9H2K8	G3V1Q8;Q9H2K8	1	1	1	1;1	1;1	1;1	TRUE
Ribonuclease pancreatic	RNASE1	tr|G3V357|G3V357_HUMAN Ribonuclease pancreatic OS=Homo sapiens OX=9606 GN=RNASE1 PE=1 SV=1;sp|P07998|RNAS1_HUMAN Ribonuclease pancreatic OS=Homo sapiens OX=9606 GN=RNASE1 PE=1 SV=4	20.1144	20.1144	22.6994	1	1	1	19.8	19.8	19.8	13.049	0.047809	0.86583	6810700	0	19.8		116	2	G3V357;P07998	G3V357;P07998	1	1	1	1;1	1;1	1;1	TRUE
Protein FAM214A	FAM214A	tr|H0Y3Q9|H0Y3Q9_HUMAN Protein FAM214A (Fragment) OS=Homo sapiens OX=9606 GN=FAM214A PE=1 SV=2;sp|Q32MH5|F214A_HUMAN Protein FAM214A OS=Homo sapiens OX=9606 GN=FAM214A PE=1 SV=2	17.2129	17.2129	22.6393	1	1	1	2.5	2.5	2.5	105.8	0.1021	0.62942	6532700	0	2.5		938	2	H0Y3Q9;Q32MH5	H0Y3Q9;Q32MH5	1	1	1	1;1	1;1	1;1	TRUE
Low affinity immunoglobulin gamma Fc region receptor III-A;Low affinity immunoglobulin gamma Fc region receptor III-B	FCGR3A;FCGR3B	tr|H0Y755|H0Y755_HUMAN Low affinity immunoglobulin gamma Fc region receptor III-A (Fragment) OS=Homo sapiens OX=9606 GN=FCGR3A PE=1 SV=2;tr|M9MML0|M9MML0_HUMAN Low affinity immunoglobulin gamma Fc region receptor III-A OS=Homo sapiens OX=9606 GN=FCGR3A PE=	24.0561	24.0561	27.0562	7	7	7	21.2	21.2	21.2	34.722	0	17.052	139550000	13	21.2		307	9	H0Y755;M9MML0;P08637;A0A087WZR4;H0Y4U3;A0A3B3ISU3;M9MML6;O75015;C9JC71	H0Y755;M9MML0;P08637;A0A087WZR4;H0Y4U3;A0A3B3ISU3;M9MML6;O75015	7	7	7	7;7;7;4;4;4;4;4;2	7;7;7;4;4;4;4;4;2	7;7;7;4;4;4;4;4;2	True;True;True;True;True;True;True
Dedicator of cytokinesis protein 5	DOCK5	tr|H0Y7N4|H0Y7N4_HUMAN Dedicator of cytokinesis protein 5 (Fragment) OS=Homo sapiens OX=9606 GN=DOCK5 PE=1 SV=1;sp|Q9H7D0|DOCK5_HUMAN Dedicator of cytokinesis protein 5 OS=Homo sapiens OX=9606 GN=DOCK5 PE=1 SV=3	19.7922	19.7922	25.4361	1	1	1	3	3	3	126.01	0.095385	0.63196	45398000	0	3		1090	2	H0Y7N4;Q9H7D0	H0Y7N4;Q9H7D0	1	1	1	1;1	1;1	1;1	TRUE
	ACSF2	tr|H0Y8Y5|H0Y8Y5_HUMAN Acyl-CoA synthetase family member 2, mitochondrial (Fragment) OS=Homo sapiens OX=9606 GN=ACSF2 PE=4 SV=1;tr|H0Y8N1|H0Y8N1_HUMAN Acyl-CoA synthetase family member 2, mitochondrial (Fragment) OS=Homo sapiens OX=9606 GN=ACSF2 PE=1 SV=1				1	1	1	8.2	8.2	8.2	9.4918	0.084211	0.69297	0	1	8.2		85	2	H0Y8Y5;H0Y8N1	H0Y8Y5;H0Y8N1	1	1	1	1;1	1;1	1;1	TRUE
60S acidic ribosomal protein P2	RPLP2	tr|H0YDD8|H0YDD8_HUMAN 60S acidic ribosomal protein P2 (Fragment) OS=Homo sapiens OX=9606 GN=RPLP2 PE=1 SV=1;sp|P05387|RLA2_HUMAN 60S acidic ribosomal protein P2 OS=Homo sapiens OX=9606 GN=RPLP2 PE=1 SV=1	20.5654	20.5654	22.1503	1	1	1	13	13	13	8.9857	0.051181	0.8186	4655000	1	13		92	2	H0YDD8;P05387	H0YDD8;P05387	1	1	1	1;1	1;1	1;1	TRUE
Transmembrane protein 179B	TMEM179B	tr|H0YEV1|H0YEV1_HUMAN Transmembrane protein 179B (Fragment) OS=Homo sapiens OX=9606 GN=TMEM179B PE=1 SV=1;sp|Q7Z7N9|T179B_HUMAN Transmembrane protein 179B OS=Homo sapiens OX=9606 GN=TMEM179B PE=1 SV=1	25.8509	25.8509	27.4359	1	1	1	21.1	21.1	21.1	10.407	0.096875	0.63628	181560000	1	21.1		95	2	H0YEV1;Q7Z7N9	H0YEV1;Q7Z7N9	1	1	1	1;1	1;1	1;1	TRUE
	SLC38A6	tr|H0YJG2|H0YJG2_HUMAN Probable sodium-coupled neutral amino acid transporter 6 (Fragment) OS=Homo sapiens OX=9606 GN=SLC38A6 PE=4 SV=1	29.523	29.523	29.523	1	1	1	18	18	18	9.5482	0.093248	0.64416	771440000	2	18	89	89	1	H0YJG2	H0YJG2	1	1	1	1	1	1	TRUE
Electron transfer flavoprotein subunit alpha, mitochondrial	ETFA	tr|H0YK49|H0YK49_HUMAN Electron transfer flavoprotein subunit alpha, mitochondrial OS=Homo sapiens OX=9606 GN=ETFA PE=1 SV=1;tr|H0YL12|H0YL12_HUMAN Electron transfer flavoprotein subunit alpha, mitochondrial (Fragment) OS=Homo sapiens OX=9606 GN=ETFA PE=1	23.1532	23.1532	26.9606	1	1	1	7.4	7.4	7.4	24.16	0.044534	0.88693	130600000	2	7.4		229	4	H0YK49;H0YL12;H0YNX6;P13804	H0YK49;H0YL12;H0YNX6;P13804	1	1	1	1;1;1;1	1;1;1;1	1;1;1;1	TRUE
Enhancer of mRNA-decapping protein 3	EDC3	tr|H3BSQ0|H3BSQ0_HUMAN Enhancer of mRNA-decapping protein 3 (Fragment) OS=Homo sapiens OX=9606 GN=EDC3 PE=1 SV=1;tr|H3BPN4|H3BPN4_HUMAN Enhancer of mRNA-decapping protein 3 (Fragment) OS=Homo sapiens OX=9606 GN=EDC3 PE=1 SV=1;sp|Q96F86|EDC3_HUMAN Enhancer	20.8779	20.8779	24.1999	1	1	1	5.5	5.5	5.5	18.52	0.069343	0.72341	19270000	1	5.5		163	3	H3BSQ0;H3BPN4;Q96F86	H3BSQ0;H3BPN4;Q96F86	1	1	1	1;1;1	1;1;1	1;1;1	TRUE
Fructose-bisphosphate aldolase;Fructose-bisphosphate aldolase A	ALDOA	tr|H3BR68|H3BR68_HUMAN Fructose-bisphosphate aldolase A (Fragment) OS=Homo sapiens OX=9606 GN=ALDOA PE=1 SV=1;tr|H3BQN4|H3BQN4_HUMAN Fructose-bisphosphate aldolase OS=Homo sapiens OX=9606 GN=ALDOA PE=1 SV=1;tr|J3KPS3|J3KPS3_HUMAN Fructose-bisphosphate aldo				1	1	1	6.9	6.9	6.9	13.667	0.045643	0.90283	0	1	6.9		130	4	H3BR68;H3BQN4;J3KPS3;P04075	H3BR68;H3BQN4;J3KPS3;P04075	1	1	1	1;1;1;1	1;1;1;1	1;1;1;1	TRUE
Tetraspanin;Tetraspanin-14	TSPAN14	tr|H7BXY6|H7BXY6_HUMAN Tetraspanin OS=Homo sapiens OX=9606 GN=TSPAN14 PE=1 SV=1;sp|Q8NG11|TSN14_HUMAN Tetraspanin-14 OS=Homo sapiens OX=9606 GN=TSPAN14 PE=1 SV=1	24.9718	24.9718	28.1417	1	1	1	3.8	3.8	3.8	23.918	0	1.884	296140000	1	3.8		213	2	H7BXY6;Q8NG11	H7BXY6;Q8NG11	1	1	1	1;1	1;1	1;1	TRUE
Nucleolin	NCL	tr|H7BY16|H7BY16_HUMAN Nucleolin (Fragment) OS=Homo sapiens OX=9606 GN=NCL PE=1 SV=8;sp|P19338|NUCL_HUMAN Nucleolin OS=Homo sapiens OX=9606 GN=NCL PE=1 SV=3	17.8173	17.8173	22.2096	2	2	2	7.1	7.1	7.1	32.389	0.0047393	1.3888	4850100	1	7.1		296	2	H7BY16;P19338	H7BY16;P19338	2	2	2	2;2	2;2	2;2	True;True
Histone-lysine N-methyltransferase 2C	KMT2C	tr|H7BY37|H7BY37_HUMAN Histone-lysine N-methyltransferase 2C (Fragment) OS=Homo sapiens OX=9606 GN=KMT2C PE=1 SV=1;sp|Q8NEZ4|KMT2C_HUMAN Histone-lysine N-methyltransferase 2C OS=Homo sapiens OX=9606 GN=KMT2C PE=1 SV=3	17.0529	17.0529	23.6528	1	1	1	0.3	0.3	0.3	269.5	0.078014	0.69827	13189000	1	0.3		2441	2	H7BY37;Q8NEZ4	H7BY37;Q8NEZ4	1	1	1	1;1	1;1	1;1	TRUE
Uncharacterized protein KIAA1109	KIAA1109	tr|H7C070|H7C070_HUMAN Transmembrane protein KIAA1109 (Fragment) OS=Homo sapiens OX=9606 GN=KIAA1109 PE=1 SV=1;sp|Q2LD37|K1109_HUMAN Transmembrane protein KIAA1109 OS=Homo sapiens OX=9606 GN=KIAA1109 PE=1 SV=2	27.6013	27.6013	33.6457	1	1	1	1.3	1.3	1.3	180.5	0.057034	0.76041	13439000000	1	1.3		1638	2	H7C070;Q2LD37	H7C070;Q2LD37	1	1	1	1;1	1;1	1;1	TRUE
	FNDC3A	tr|H7C507|H7C507_HUMAN Fibronectin type-III domain-containing protein 3A (Fragment) OS=Homo sapiens OX=9606 GN=FNDC3A PE=1 SV=1				1	1	1	6.5	6.5	6.5	15.881	0.078292	0.70495	0	1	6.5	139	139	1	H7C507	H7C507	1	1	1	1	1	1	TRUE
	RFC2	tr|H7C5G4|H7C5G4_HUMAN Replication factor C subunit 2 (Fragment) OS=Homo sapiens OX=9606 GN=RFC2 PE=1 SV=1	23.4201	23.4201	25.0051	1	1	1	42.6	42.6	42.6	10.835	0.095679	0.6322	33672000	0	42.6	101	101	1	H7C5G4	H7C5G4	1	1	1	1	1	1	TRUE
Metalloendopeptidase;Meprin A subunit beta	MEP1B	tr|J3KRK1|J3KRK1_HUMAN Meprin A subunit beta (Fragment) OS=Homo sapiens OX=9606 GN=MEP1B PE=1 SV=1;tr|J3QKX5|J3QKX5_HUMAN Meprin A subunit OS=Homo sapiens OX=9606 GN=MEP1B PE=1 SV=1;sp|Q16820|MEP1B_HUMAN Meprin A subunit beta OS=Homo sapiens OX=9606 GN=MEP				1	1	1	7.9	7.9	7.9	13.047	0.004902	1.5628	0	1	7.9		114	3	J3KRK1;J3QKX5;Q16820	J3KRK1;J3QKX5;Q16820	1	1	1	1;1;1	1;1;1	1;1;1	TRUE
	NAT9	tr|J3QL33|J3QL33_HUMAN N-acetyltransferase 9 OS=Homo sapiens OX=9606 GN=NAT9 PE=1 SV=1	24.7408	24.7408	27.0627	1	1	1	14.1	14.1	14.1	15.217	0.042553	0.95289	140180000	2	14.1	135	135	1	J3QL33	J3QL33	1	1	1	1	1	1	TRUE
	PSMD11	tr|J3QRY4|J3QRY4_HUMAN 26S proteasome non-ATPase regulatory subunit 11 (Fragment) OS=Homo sapiens OX=9606 GN=PSMD11 PE=1 SV=8	21.369	21.369	24.5389	1	1	1	9.6	9.6	9.6	21.109	0.05597	0.74941	24375000	1	9.6	187	187	1	J3QRY4	J3QRY4	1	1	1	1	1	1	TRUE
Zinc finger protein 285	ZNF285	tr|K7EIK6|K7EIK6_HUMAN Zinc finger protein 285 OS=Homo sapiens OX=9606 GN=ZNF285 PE=1 SV=2;sp|Q96NJ3|ZN285_HUMAN Zinc finger protein 285 OS=Homo sapiens OX=9606 GN=ZNF285 PE=2 SV=2	19.1775	19.1775	24.1317	1	1	1	3.9	3.9	3.9	68.91	0.069597	0.72597	18381000	1	3.9		597	2	K7EIK6;Q96NJ3	K7EIK6;Q96NJ3	1	1	1	1;1	1;1	1;1	TRUE
Protein KIAA0100	KIAA0100	tr|K7EQR3|K7EQR3_HUMAN Protein KIAA0100 (Fragment) OS=Homo sapiens OX=9606 GN=KIAA0100 PE=1 SV=1;tr|Q08E86|Q08E86_HUMAN KIAA0100 protein OS=Homo sapiens OX=9606 GN=KIAA0100 PE=1 SV=1;tr|K7EQ86|K7EQ86_HUMAN KIAA0100, isoform CRA_a OS=Homo sapiens OX=9606 GN	21.1703	21.1703	24.8707	1	1	1	3.1	3.1	3.1	33.183	0	1.7097	30678000	2	3.1		287	4	K7EQR3;Q08E86;K7EQ86;Q14667	K7EQR3;Q08E86;K7EQ86;Q14667	1	1	1	1;1;1;1	1;1;1;1	1;1;1;1	TRUE
Apolipoprotein C-I;Truncated apolipoprotein C-I	APOC1	tr|K7ERI9|K7ERI9_HUMAN Apolipoprotein C-I (Fragment) OS=Homo sapiens OX=9606 GN=APOC1 PE=1 SV=1;sp|P02654|APOC1_HUMAN Apolipoprotein C-I OS=Homo sapiens OX=9606 GN=APOC1 PE=1 SV=1;tr|K7EJI9|K7EJI9_HUMAN Apolipoprotein C-I OS=Homo sapiens OX=9606 GN=APOC1 P	28.3989	28.3989	29.9839	7	7	7	42.9	42.9	42.9	8.647	0	18.045	1061800000	23	42.9		77	6	K7ERI9;P02654;K7EJI9;K7ELM9;K7EPF9;K7EKP1	K7ERI9;P02654;K7EJI9;K7ELM9;K7EPF9	7	7	7	7;7;5;5;5;3	7;7;5;5;5;3	7;7;5;5;5;3	True;True;True;True;True;True;True
	CLPTM1	tr|K7ERL5|K7ERL5_HUMAN Cleft lip and palate transmembrane protein 1 (Fragment) OS=Homo sapiens OX=9606 GN=CLPTM1 PE=1 SV=1				1	1	1	3.3	3.3	3.3	23.097	0.10149	0.62848	0	1	3.3	209	209	1	K7ERL5	K7ERL5	1	1	1	1	1	1	TRUE
Dipeptidyl peptidase 9	DPP9	tr|M0R2A8|M0R2A8_HUMAN Dipeptidyl peptidase 9 OS=Homo sapiens OX=9606 GN=DPP9 PE=1 SV=1;sp|Q86TI2|DPP9_HUMAN Dipeptidyl peptidase 9 OS=Homo sapiens OX=9606 GN=DPP9 PE=1 SV=3	21.1897	21.1897	25.8901	1	1	1	3.7	3.7	3.7	59.069	0.096026	0.65976	62188000	2	3.7		518	2	M0R2A8;Q86TI2	M0R2A8;Q86TI2	1	1	1	1;1	1;1	1;1	TRUE
Apolipoprotein L1	APOL1	sp|O14791|APOL1_HUMAN Apolipoprotein L1 OS=Homo sapiens OX=9606 GN=APOL1 PE=1 SV=5	29.4153	29.4153	33.6632	29	29	29	61.6	61.6	61.6	43.974	0	323.31	13603000000	86	61.6		398	3	O14791;B1AH96;B1AH94	O14791	29	29	29	29;14;1	29;14;1	29;14;1	True;True;True;True;True;True;True;True;True;True;True;True;True;True;True;True;True;True;True;True;True;True;True;True;True;True;True;True;True
Beta-defensin 4A	DEFB4A	sp|O15263|DFB4A_HUMAN Beta-defensin 4A OS=Homo sapiens OX=9606 GN=DEFB4A PE=1 SV=1	22.2822	22.2822	23.2822	1	1	1	18.8	18.8	18.8	7.0376	0.056391	0.75747	10201000	0	18.8	64	64	1	O15263	O15263	1	1	1	1	1	1	TRUE
CD5 antigen-like	CD5L	sp|O43866|CD5L_HUMAN CD5 antigen-like OS=Homo sapiens OX=9606 GN=CD5L PE=1 SV=1	28.3424	28.3424	32.5124	19	19	19	66	66	66	38.087	0	323.31	6126300000	81	66	347	347	1	O43866	O43866	19	19	19	19	19	19	True;True;True;True;True;True;True;True;True;True;True;True;True;True;True;True;True;True;True
Protein phosphatase 1 regulatory subunit 12B	PPP1R12B	sp|O60237|MYPT2_HUMAN Protein phosphatase 1 regulatory subunit 12B OS=Homo sapiens OX=9606 GN=PPP1R12B PE=1 SV=2	18.9657	18.9657	24.5506	1	1	1	3.5	3.5	3.5	110.4	0.10061	0.62967	24574000	0	3.5	982	982	1	O60237	O60237	1	1	1	1	1	1	TRUE
Histone H2B type F-S;Histone H2B type 1-K;Histone H2B type 1-C/E/F/G/I;Histone H2B type 1-D;Histone H2B type 1-L;Histone H2B type 1-M;Histone H2B type 1-N;Histone H2B type 1-H;Histone H2B type 2-F;Histone H2B;Histone H2B type 2-E;Histone H2B type 1-J;Histone H2B type 3-B;Histone H2B type 1-O;Histone H2B type 1-B	H2BFS;HIST1H2BK;HIST1H2BC;HIST1H2BD;HIST1H2BL;HIST1H2BM;HIST1H2BN;HIST1H2BH;HIST2H2BF;HIST2H2BE;HIST1H2BJ;HIST3H2BB;HIST1H2BO;HIST1H2BB	sp|P57053|H2BFS_HUMAN Histone H2B type F-S OS=Homo sapiens OX=9606 GN=H2BFS PE=1 SV=2;sp|O60814|H2B1K_HUMAN Histone H2B type 1-K OS=Homo sapiens OX=9606 GN=HIST1H2BK PE=1 SV=3;sp|P62807|H2B1C_HUMAN Histone H2B type 1-C/E/F/G/I OS=Homo sapiens OX=9606 GN=HI	26.864	26.864	29.6713	6	6	6	44.4	44.4	44.4	13.944	0	75.146	854970000	15	44.4		126	17	P57053;O60814;P62807;P58876;Q99880;Q99879;Q99877;Q93079;Q5QNW6;U3KQK0;Q16778;P06899;Q8N257;P23527;P33778;Q96A08;A0A2R8Y619	P57053;O60814;P62807;P58876;Q99880;Q99879;Q99877;Q93079;Q5QNW6;U3KQK0;Q16778;P06899;Q8N257;P23527;P33778	6	6	6	6;6;6;5;5;5;5;5;5;5;4;4;3;3;3;2;1	6;6;6;5;5;5;5;5;5;5;4;4;3;3;3;2;1	6;6;6;5;5;5;5;5;5;5;4;4;3;3;3;2;1	True;True;True;True;True;True
Peptidoglycan recognition protein 1	PGLYRP1	sp|O75594|PGRP1_HUMAN Peptidoglycan recognition protein 1 OS=Homo sapiens OX=9606 GN=PGLYRP1 PE=1 SV=1	24.7679	24.7679	28.0899	4	4	4	37.2	37.2	37.2	21.731	0	87.568	285690000	9	37.2	196	196	1	O75594	O75594	4	4	4	4	4	4	True;True;True;True
Chorion-specific transcription factor GCMb	GCM2	sp|O75603|GCM2_HUMAN Chorion-specific transcription factor GCMb OS=Homo sapiens OX=9606 GN=GCM2 PE=1 SV=1	24.9375	24.9375	29.5225	1	1	1	2.2	2.2	2.2	56.609	0.045455	0.89754	771160000	1	2.2	506	506	1	O75603	O75603	1	1	1	1	1	1	TRUE
Calcium-binding mitochondrial carrier protein Aralar2;Calcium-binding mitochondrial carrier protein Aralar1	SLC25A13;SLC25A12	sp|Q9UJS0|CMC2_HUMAN Calcium-binding mitochondrial carrier protein Aralar2 OS=Homo sapiens OX=9606 GN=SLC25A13 PE=1 SV=2;sp|O75746|CMC1_HUMAN Calcium-binding mitochondrial carrier protein Aralar1 OS=Homo sapiens OX=9606 GN=SLC25A12 PE=1 SV=2	16.32	16.32	21.2269	1	1	1	1	1	1	74.175	0.062731	0.73049	2454300	1	1		675	2	Q9UJS0;O75746	Q9UJS0;O75746	1	1	1	1;1	1;1	1;1	TRUE
Kelch repeat and BTB domain-containing protein 11	KBTBD11	sp|O94819|KBTBB_HUMAN Kelch repeat and BTB domain-containing protein 11 OS=Homo sapiens OX=9606 GN=KBTBD11 PE=1 SV=1	21.5036	21.5036	26.2585	1	1	1	1.6	1.6	1.6	65.719	0.027273	1.1231	80280000	1	1.6	623	623	1	O94819	O94819	1	1	1	1	1	1	TRUE
Apolipoprotein M	APOM	sp|O95445|APOM_HUMAN Apolipoprotein M OS=Homo sapiens OX=9606 GN=APOM PE=1 SV=2;tr|Q5SRP5|Q5SRP5_HUMAN Apolipoprotein M OS=Homo sapiens OX=9606 GN=APOM PE=1 SV=1	24.4511	24.4511	27.773	5	5	5	36.7	36.7	36.7	21.253	0	60.555	229360000	8	36.7		188	2	O95445;Q5SRP5	O95445;Q5SRP5	5	5	5	5;3	5;3	5;3	True;True;True;True;True
Adenylate cyclase type 5	ADCY5	sp|O95622|ADCY5_HUMAN Adenylate cyclase type 5 OS=Homo sapiens OX=9606 GN=ADCY5 PE=1 SV=3	18.2528	18.2528	23.8073	1	1	1	0.7	0.7	0.7	138.91	0.082759	0.68182	14680000	1	0.7	1261	1261	1	O95622	O95622	1	1	1	1	1	1	TRUE
Haptoglobin;Haptoglobin alpha chain;Haptoglobin beta chain	HP	sp|P00738|HPT_HUMAN Haptoglobin OS=Homo sapiens OX=9606 GN=HP PE=1 SV=1;tr|A0A0C4DGL8|A0A0C4DGL8_HUMAN Haptoglobin OS=Homo sapiens OX=9606 GN=HP PE=1 SV=1;tr|J3QR68|J3QR68_HUMAN Haptoglobin (Fragment) OS=Homo sapiens OX=9606 GN=HP PE=1 SV=1;tr|H0Y300|H0Y30	24.0804	24.0804	28.4023	18	8	8	42.4	21.2	21.2	45.205	0	63.351	354780000	21	42.4		406	11	P00738;A0A0C4DGL8;J3QR68;H0Y300;J3QLC9;A0A087WU08;H3BS21;J3KRH2;J3KSV1;J3QQI8;H3BMJ7	P00738;A0A0C4DGL8;J3QR68;H0Y300;J3QLC9;A0A087WU08	8	8	18	8;6;6;6;8;6;5;2;2;2;2	8;6;6;6;8;6;5;2;2;2;2	18;16;16;16;15;11;7;6;2;2;2	False;False;False;True;True;False;False;True;False;False;True;False;False;False;True;True;True;True
Haptoglobin-related protein	HPR	sp|P00739|HPTR_HUMAN Haptoglobin-related protein OS=Homo sapiens OX=9606 GN=HPR PE=2 SV=2;tr|A0A0A0MRD9|A0A0A0MRD9_HUMAN Haptoglobin-related protein OS=Homo sapiens OX=9606 GN=HPR PE=1 SV=1	27.598	27.598	31.9199	21	21	11	78.7	78.7	54	39.029	0	323.31	4063000000	60	78.7		348	3	P00739;A0A0A0MRD9;J3KTC3	P00739;A0A0A0MRD9	11	21	21	11;9;2	21;14;7	21;14;7	True;True;True;True;True;True;True;True;True;True;True;True;True;True;True;True;True;True;True;True;True
Plasminogen;Plasmin heavy chain A;Activation peptide;Angiostatin;Plasmin heavy chain A, short form;Plasmin light chain B	PLG	sp|P00747|PLMN_HUMAN Plasminogen OS=Homo sapiens OX=9606 GN=PLG PE=1 SV=2	20.6305	20.6305	26.0567	8	8	8	14.8	14.8	14.8	90.568	0	10.401	69800000	10	14.8		810	4	P00747;Q5TEH5;A6PVI2;CON__P06868	P00747	8	8	8	8;1;1;1	8;1;1;1	8;1;1;1	True;True;True;True;True;True;True;True
Antithrombin-III	SERPINC1	sp|P01008|ANT3_HUMAN Antithrombin-III OS=Homo sapiens OX=9606 GN=SERPINC1 PE=1 SV=1;tr|Q8TCE1|Q8TCE1_HUMAN Antithrombin-III OS=Homo sapiens OX=9606 GN=SERPINC1 PE=1 SV=1	21.0499	21.0499	25.8048	7	7	7	19.6	19.6	19.6	52.602	0	12.982	58617000	10	19.6		464	3	P01008;Q8TCE1;CON__P41361	P01008;Q8TCE1	7	7	7	7;4;1	7;4;1	7;4;1	True;True;True;True;True;True;True
Alpha-1-antitrypsin;Short peptide from AAT	SERPINA1	sp|P01009|A1AT_HUMAN Alpha-1-antitrypsin OS=Homo sapiens OX=9606 GN=SERPINA1 PE=1 SV=3	22.72	22.72	27.2436	32	3	3	67.7	6.2	6.2	46.736	0	31.558	158910000	10	67.7	418	418	1	P01009	P01009	3	3	32	3	3	32	False;True;False;False;False;False;False;True;False;False;False;False;False;False;False;False;False;False;False;False;False;False;False;False;False;False;False;False;False;False;False;True
Alpha-1-antichymotrypsin;Alpha-1-antichymotrypsin His-Pro-less	SERPINA3	sp|P01011|AACT_HUMAN Alpha-1-antichymotrypsin OS=Homo sapiens OX=9606 GN=SERPINA3 PE=1 SV=2;tr|G3V3A0|G3V3A0_HUMAN Alpha-1-antichymotrypsin OS=Homo sapiens OX=9606 GN=SERPINA3 PE=1 SV=1	23.8195	23.8195	28.1414	9	9	9	28.8	28.8	28.8	47.65	0	27.602	296080000	13	28.8		423	3	P01011;G3V3A0;G3V595	P01011;G3V3A0	9	9	9	9;6;4	9;6;4	9;6;4	True;True;True;True;True;True;True;True;True
Angiotensinogen;Angiotensin-1;Angiotensin-2;Angiotensin-3;Angiotensin-4;Angiotensin 1-9;Angiotensin 1-7;Angiotensin 1-5;Angiotensin 1-4	AGT	sp|P01019|ANGT_HUMAN Angiotensinogen OS=Homo sapiens OX=9606 GN=AGT PE=1 SV=1	22.4713	22.4713	26.6411	3	3	3	11.8	11.8	11.8	53.154	0	49.499	104660000	4	11.8	485	485	1	P01019	P01019	3	3	3	3	3	3	True;True;True
Complement C3;Complement C3 beta chain;C3-beta-c;Complement C3 alpha chain;C3a anaphylatoxin;Acylation stimulating protein;Complement C3b alpha chain;Complement C3c alpha chain fragment 1;Complement C3dg fragment;Complement C3g fragment;Complement C3d fragment;Complement C3f fragment;Complement C3c alpha chain fragment 2	C3	sp|P01024|CO3_HUMAN Complement C3 OS=Homo sapiens OX=9606 GN=C3 PE=1 SV=2	20.0455	20.0455	26.6154	7	7	7	5.2	5.2	5.2	187.15	0	14.076	102810000	8	5.2		1663	3	P01024;M0R0Q9;CON__Q2UVX4	P01024	7	7	7	7;2;1	7;2;1	7;2;1	True;True;True;True;True;True;True
Metalloproteinase inhibitor 1	TIMP1	tr|Q5H9A7|Q5H9A7_HUMAN Metalloproteinase inhibitor 1 OS=Homo sapiens OX=9606 GN=TIMP1 PE=1 SV=1;sp|P01033|TIMP1_HUMAN Metalloproteinase inhibitor 1 OS=Homo sapiens OX=9606 GN=TIMP1 PE=1 SV=1;tr|Q5H9B4|Q5H9B4_HUMAN Metalloproteinase inhibitor 1 (Fragment) O	20.9034	20.9034	23.9034	2	2	2	21.7	21.7	21.7	16.057	0	4.8228	15691000	3	21.7		143	5	Q5H9A7;P01033;Q5H9B4;Q5H9B5;H0Y789	Q5H9A7;P01033;Q5H9B4;Q5H9B5;H0Y789	2	2	2	2;2;1;1;1	2;2;1;1;1	2;2;1;1;1	True;True
Kininogen-1;Kininogen-1 heavy chain;T-kinin;Bradykinin;Lysyl-bradykinin;Kininogen-1 light chain;Low molecular weight growth-promoting factor	KNG1	sp|P01042|KNG1_HUMAN Kininogen-1 OS=Homo sapiens OX=9606 GN=KNG1 PE=1 SV=2	19.2996	19.2996	24.4289	4	4	4	9.5	9.5	9.5	71.957	0	5.4643	22585000	3	9.5	644	644	1	P01042	P01042	4	4	4	4	4	4	True;True;True;True
Immunoglobulin J chain	IGJ;JCHAIN	sp|P01591|IGJ_HUMAN Immunoglobulin J chain OS=Homo sapiens OX=9606 GN=JCHAIN PE=1 SV=4;tr|D6RD17|D6RD17_HUMAN Immunoglobulin J chain (Fragment) OS=Homo sapiens OX=9606 GN=JCHAIN PE=1 SV=8;tr|D6RHJ6|D6RHJ6_HUMAN Immunoglobulin J chain (Fragment) OS=Homo sap	29.5067	29.5067	32.5067	11	11	11	65.4	65.4	65.4	18.098	0	181.04	6102100000	62	65.4		159	4	P01591;D6RD17;D6RHJ6;C9JA05	P01591;D6RD17;D6RHJ6	11	11	11	11;10;9;3	11;10;9;3	11;10;9;3	True;True;True;True;True;True;True;True;True;True;True
Ig kappa chain V-I region Daudi;Ig kappa chain V-I region DEE		sp|P04432|KVD39_HUMAN Immunoglobulin kappa variable 1D-39 OS=Homo sapiens OX=9606 GN=IGKV1D-39 PE=3 SV=2;sp|P01597|KV139_HUMAN Immunoglobulin kappa variable 1-39 OS=Homo sapiens OX=9606 GN=IGKV1-39 PE=1 SV=2	27.1665	27.1665	29.1666	2	1	1	29.1	15.4	15.4	12.737	0	41.847	602580000	6	29.1		117	2	P04432;P01597	P04432;P01597	1	1	2	1;1	1;1	2;2	True;False
Ig kappa chain V-I region Gal		sp|P01599|KV117_HUMAN Immunoglobulin kappa variable 1-17 OS=Homo sapiens OX=9606 GN=IGKV1-17 PE=1 SV=2	28.2836	28.2836	30.2836	4	4	2	26.5	26.5	13.7	12.778	0	119.92	1307000000	24	26.5	117	117	1	P01599	P01599	2	4	4	2	4	4	True;True;True;True
Ig kappa chain V-I region HK101		sp|P01601|KVD16_HUMAN Immunoglobulin kappa variable 1D-16 OS=Homo sapiens OX=9606 GN=IGKV1D-16 PE=3 SV=2	23.6444	23.6444	25.6444	2	2	2	29.1	29.1	29.1	12.73	0	47.429	52449000	4	29.1	117	117	1	P01601	P01601	2	2	2	2	2	2	True;True
Ig kappa chain V-I region HK102	IGKV1-5	sp|P01602|KV105_HUMAN Immunoglobulin kappa variable 1-5 OS=Homo sapiens OX=9606 GN=IGKV1-5 PE=1 SV=2	28.3661	28.3661	30.3661	2	2	2	24.8	24.8	24.8	12.781	0	26.941	1383900000	13	24.8	117	117	1	P01602	P01602	2	2	2	2	2	2	True;True
Ig kappa chain V-III region B6		sp|P01619|KV320_HUMAN Immunoglobulin kappa variable 3-20 OS=Homo sapiens OX=9606 GN=IGKV3-20 PE=1 SV=2	30.0116	30.0116	32.3335	5	5	2	46.6	46.6	26.7	12.557	0	212.52	5411900000	31	46.6	116	116	1	P01619	P01619	2	5	5	2	5	5	True;True;True;True;True
Ig kappa chain V-III region POM	IGKV3OR2-268;IGKV3D-7	sp|P01624|KV315_HUMAN Immunoglobulin kappa variable 3-15 OS=Homo sapiens OX=9606 GN=IGKV3-15 PE=1 SV=2;tr|A0A0C4DH90|A0A0C4DH90_HUMAN Immunoglobulin kappa variable 3/OR2-268 (non-functional) (Fragment) OS=Homo sapiens OX=9606 GN=IGKV3OR2-268 PE=4 SV=5;sp|A	29.5574	29.5574	31.1424	3	1	1	32.2	7.8	7.8	12.496	0.004717	1.3738	2370200000	3	32.2		115	4	P01624;A0A0C4DH90;A0A0C4DH55;A0A075B6H7	P01624;A0A0C4DH90;A0A0C4DH55	1	1	3	1;1;1;1	1;1;1;1	3;2;2;1	False;False;True
Ig lambda chain V-I region VOR		sp|P01699|LV144_HUMAN Immunoglobulin lambda variable 1-44 OS=Homo sapiens OX=9606 GN=IGLV1-44 PE=1 SV=2	25.0405	25.0405	26.0405	3	1	1	42.7	24.8	24.8	12.201	0	79.686	69020000	3	42.7	117	117	1	P01699	P01699	1	1	3	1	1	3	False;False;True
Ig lambda chain V-I region HA		sp|P01700|LV147_HUMAN Immunoglobulin lambda variable 1-47 OS=Homo sapiens OX=9606 GN=IGLV1-47 PE=1 SV=2	28.5767	28.5767	30.5767	4	4	2	53.8	53.8	35.9	12.283	0	45.128	1601400000	22	53.8	117	117	1	P01700	P01700	2	4	4	2	4	4	True;True;True;True
Ig lambda chain V-I region NEW		sp|P01701|LV151_HUMAN Immunoglobulin lambda variable 1-51 OS=Homo sapiens OX=9606 GN=IGLV1-51 PE=1 SV=2	26.8021	26.8021	28.3871	4	4	4	42.7	42.7	42.7	12.249	0	99.211	351040000	10	42.7	117	117	1	P01701	P01701	4	4	4	4	4	4	True;True;True;True
Ig lambda chain V-I region NEWM		sp|P01703|LV140_HUMAN Immunoglobulin lambda variable 1-40 OS=Homo sapiens OX=9606 GN=IGLV1-40 PE=1 SV=2	26.5776	26.5776	27.5775	2	2	2	43.2	43.2	43.2	12.301	0	53.782	200290000	4	43.2	118	118	1	P01703	P01703	2	2	2	2	2	2	True;True
Ig lambda chain V-II region TOG		sp|P01704|LV214_HUMAN Immunoglobulin lambda variable 2-14 OS=Homo sapiens OX=9606 GN=IGLV2-14 PE=1 SV=2	27.7486	27.7486	27.7486	1	1	1	13.3	13.3	13.3	12.597	0	2.6548	225500000	8	13.3	120	120	1	P01704	P01704	1	1	1	1	1	1	TRUE
Ig lambda chain V-II region BOH		sp|P01706|LV211_HUMAN Immunoglobulin lambda variable 2-11 OS=Homo sapiens OX=9606 GN=IGLV2-11 PE=1 SV=2	27.403	27.403	28.9879	5	5	4	50.4	50.4	46.2	12.644	0	155.17	532400000	15	50.4	119	119	1	P01706	P01706	4	5	5	4	5	5	True;True;True;True;True
Ig lambda chain V-II region MGC		sp|P01709|LV208_HUMAN Immunoglobulin lambda variable 2-8 OS=Homo sapiens OX=9606 GN=IGLV2-8 PE=1 SV=2	26.3091	26.3091	27.3091	3	2	2	17.8	13.6	13.6	12.382	0	2.0958	166290000	3	17.8	118	118	1	P01709	P01709	2	2	3	2	2	3	True;True;False
Ig lambda chain V-III region SH		sp|P01714|LV319_HUMAN Immunoglobulin lambda variable 3-19 OS=Homo sapiens OX=9606 GN=IGLV3-19 PE=1 SV=2	27.3896	27.3896	29.3896	5	5	5	63.4	63.4	63.4	12.042	0	151.09	703330000	15	63.4	112	112	1	P01714	P01714	5	5	5	5	5	5	True;True;True;True;True
Ig lambda chain V-IV region Bau		sp|P01715|LV301_HUMAN Immunoglobulin lambda variable 3-1 OS=Homo sapiens OX=9606 GN=IGLV3-1 PE=1 SV=2	24.9565	24.9565	25.9565	4	3	3	29.6	29.6	29.6	12.296	0	46.498	65114000	4	29.6	115	115	1	P01715	P01715	3	3	4	3	3	4	True;False;True;True
Ig lambda chain V-IV region Hil		sp|P01717|LV325_HUMAN Immunoglobulin lambda variable 3-25 OS=Homo sapiens OX=9606 GN=IGLV3-25 PE=1 SV=2	28.5616	28.5616	30.1465	4	3	2	36.6	27.7	27.7	12.011	0	121.4	1188500000	12	36.6	112	112	1	P01717	P01717	2	3	4	2	3	4	True;False;True;True
Ig lambda chain V-IV region Kern		sp|P01718|LV327_HUMAN Immunoglobulin lambda variable 3-27 OS=Homo sapiens OX=9606 GN=IGLV3-27 PE=1 SV=2	26.8845	26.8845	28.4695	4	3	3	32.7	32.7	32.7	12.165	0	18.605	371680000	5	32.7	113	113	1	P01718	P01718	3	3	4	3	3	4	False;True;True;True
Ig heavy chain V-III region TRO		sp|P01762|HV311_HUMAN Immunoglobulin heavy variable 3-11 OS=Homo sapiens OX=9606 GN=IGHV3-11 PE=1 SV=2	24.2549	24.2549	26.8399	5	1	1	42.7	16.2	16.2	12.909	0	104.68	120120000	2	42.7	117	117	1	P01762	P01762	1	1	5	1	1	5	False;False;False;True;False
Ig heavy chain V-III region 23	IGHV3-23	sp|P01764|HV323_HUMAN Immunoglobulin heavy variable 3-23 OS=Homo sapiens OX=9606 GN=IGHV3-23 PE=1 SV=2	30.3434	30.3434	32.9283	8	6	3	59	59	36.8	12.582	0	323.31	8173500000	124	59	117	117	1	P01764	P01764	3	6	8	3	6	8	True;False;True;True;True;True;False;True
Ig heavy chain V-III region BRO		sp|P01766|HV313_HUMAN Immunoglobulin heavy variable 3-13 OS=Homo sapiens OX=9606 GN=IGHV3-13 PE=1 SV=2	27.7825	27.7825	29.7825	4	3	3	38.8	38.8	38.8	12.506	0	56.667	923470000	18	38.8	116	116	1	P01766	P01766	3	3	4	3	3	4	True;True;True;False
Ig heavy chain V-III region BUT	IGHV3-66	sp|P01767|HV353_HUMAN Immunoglobulin heavy variable 3-53 OS=Homo sapiens OX=9606 GN=IGHV3-53 PE=1 SV=2;sp|A0A0C4DH42|HV366_HUMAN Immunoglobulin heavy variable 3-66 OS=Homo sapiens OX=9606 GN=IGHV3-66 PE=3 SV=1	31.356	31.356	33.941	9	9	4	62.9	62.9	40.5	12.769	0	323.31	16492000000	104	62.9		116	2	P01767;A0A0C4DH42	P01767;A0A0C4DH42	4	9	9	4;1	9;6	9;6	True;True;True;True;True;True;True;True;True
Ig heavy chain V-III region KOL		sp|P01772|HV333_HUMAN Immunoglobulin heavy variable 3-33 OS=Homo sapiens OX=9606 GN=IGHV3-33 PE=1 SV=2	23.1656	23.1656	25.973	6	1	0	38.5	16.2	0	13.074	0	22.666	65864000	4	38.5	117	117	1	P01772	P01772	0	1	6	0	1	6	False;False;False;True;False;False
Ig heavy chain V-III region JON		sp|P01780|HV307_HUMAN Immunoglobulin heavy variable 3-7 OS=Homo sapiens OX=9606 GN=IGHV3-7 PE=1 SV=2	29.6747	29.6747	31.9966	8	6	4	61.5	47.9	35	12.943	0	55.687	4285000000	38	61.5	117	117	1	P01780	P01780	4	6	8	4	6	8	False;True;False;True;True;True;True;True
Ig heavy chain V-III region DOB		sp|P01782|HV309_HUMAN Immunoglobulin heavy variable 3-9 OS=Homo sapiens OX=9606 GN=IGHV3-9 PE=1 SV=2	28.5121	28.5121	31.097	5	2	0	42.4	25.4	0	12.945	0	47.491	2296900000	27	42.4	118	118	1	P01782	P01782	0	2	5	0	2	5	True;False;False;True;False
Polymeric immunoglobulin receptor;Secretory component	PIGR	sp|P01833|PIGR_HUMAN Polymeric immunoglobulin receptor OS=Homo sapiens OX=9606 GN=PIGR PE=1 SV=4	23.7998	23.7998	29.1217	19	19	19	32.1	32.1	32.1	83.283	0	322.83	584120000	37	32.1	764	764	1	P01833	P01833	19	19	19	19	19	19	True;True;True;True;True;True;True;True;True;True;True;True;True;True;True;True;True;True;True
Ig kappa chain C region	IGKC	sp|P01834|IGKC_HUMAN Immunoglobulin kappa constant OS=Homo sapiens OX=9606 GN=IGKC PE=1 SV=2	34.5243	34.5243	36.8462	15	15	15	100	100	100	11.765	0	323.31	123540000000	332	100	107	107	1	P01834	P01834	15	15	15	15	15	15	True;True;True;True;True;True;True;True;True;True;True;True;True;True;True
Ig mu chain C region	IGHM	sp|P01871|IGHM_HUMAN Immunoglobulin heavy constant mu OS=Homo sapiens OX=9606 GN=IGHM PE=1 SV=4;tr|A0A1B0GUU9|A0A1B0GUU9_HUMAN Immunoglobulin heavy constant mu (Fragment) OS=Homo sapiens OX=9606 GN=IGHM PE=1 SV=1	32.6851	32.6851	37.329	39	39	39	69.8	69.8	69.8	49.439	0	323.31	172640000000	395	69.8		453	2	P01871;A0A1B0GUU9	P01871;A0A1B0GUU9	39	39	39	39;37	39;37	39;37	True;True;True;True;True;True;True;True;True;True;True;True;True;True;True;True;True;True;True;True;True;True;True;True;True;True;True;True;True;True;True;True;True;True;True;True;True;True;True
Ig alpha-1 chain C region	IGHA1	sp|P01876|IGHA1_HUMAN Immunoglobulin heavy constant alpha 1 OS=Homo sapiens OX=9606 GN=IGHA1 PE=1 SV=2;tr|A0A286YEY1|A0A286YEY1_HUMAN Immunoglobulin heavy constant alpha 1 (Fragment) OS=Homo sapiens OX=9606 GN=IGHA1 PE=1 SV=1	31.8515	31.8515	35.7584	24	24	9	66	66	36.8	37.654	0	323.31	58124000000	201	66		353	2	P01876;A0A286YEY1	P01876;A0A286YEY1	9	24	24	9;9	24;23	24;23	True;True;True;True;True;True;True;True;True;True;True;True;True;True;True;True;True;True;True;True;True;True;True;True
Apolipoprotein A-I;Proapolipoprotein A-I;Truncated apolipoprotein A-I	APOA1	sp|P02647|APOA1_HUMAN Apolipoprotein A-I OS=Homo sapiens OX=9606 GN=APOA1 PE=1 SV=1;tr|F8W696|F8W696_HUMAN Apolipoprotein A-I OS=Homo sapiens OX=9606 GN=APOA1 PE=1 SV=1	31.1154	31.1154	35.2853	42	42	42	79.8	79.8	79.8	30.777	0	323.31	41873000000	183	79.8		267	3	P02647;F8W696;CON__P15497	P02647;F8W696	42	42	42	42;35;1	42;35;1	42;35;1	True;True;True;True;True;True;True;True;True;True;True;True;True;True;True;True;True;True;True;True;True;True;True;True;True;True;True;True;True;True;True;True;True;True;True;True;True;True;True;True;True;True
Apolipoprotein E	APOE	sp|P02649|APOE_HUMAN Apolipoprotein E OS=Homo sapiens OX=9606 GN=APOE PE=1 SV=1;tr|H0Y7L5|H0Y7L5_HUMAN Apolipoprotein E (Fragment) OS=Homo sapiens OX=9606 GN=APOE PE=1 SV=2;tr|E9PEV4|E9PEV4_HUMAN Apolipoprotein E (Fragment) OS=Homo sapiens OX=9606 GN=APOE	21.1586	21.1586	25.618	5	5	5	18.6	18.6	18.6	36.154	0	10.561	51498000	5	18.6		317	5	P02649;H0Y7L5;E9PEV4;E7ERP7;CON__Q03247	P02649;H0Y7L5;E9PEV4;E7ERP7	5	5	5	5;4;3;3;1	5;4;3;3;1	5;4;3;3;1	True;True;True;True;True
Apolipoprotein A-II;Proapolipoprotein A-II;Truncated apolipoprotein A-II	APOA2	tr|V9GYM3|V9GYM3_HUMAN Apolipoprotein A-II OS=Homo sapiens OX=9606 GN=APOA2 PE=1 SV=1;sp|P02652|APOA2_HUMAN Apolipoprotein A-II OS=Homo sapiens OX=9606 GN=APOA2 PE=1 SV=1;tr|V9GYE3|V9GYE3_HUMAN Apolipoprotein A-II OS=Homo sapiens OX=9606 GN=APOA2 PE=1 SV=1	30.7705	30.7705	33.7705	10	10	10	51.9	51.9	51.9	14.914	0	323.31	14653000000	39	51.9		133	6	V9GYM3;P02652;V9GYE3;V9GYG9;V9GYC1;V9GYS1	V9GYM3;P02652;V9GYE3;V9GYG9	10	10	10	10;10;8;8;4;4	10;10;8;8;4;4	10;10;8;8;4;4	True;True;True;True;True;True;True;True;True;True
Fibrinogen alpha chain;Fibrinopeptide A;Fibrinogen alpha chain	FGA	sp|P02671|FIBA_HUMAN Fibrinogen alpha chain OS=Homo sapiens OX=9606 GN=FGA PE=1 SV=2	26.0323	26.0323	31.1616	28	28	28	34.6	34.6	34.6	94.972	0	323.31	2402000000	68	34.6		866	2	P02671;A0A087WUA0	P02671	28	28	28	28;8	28;8	28;8	True;True;True;True;True;True;True;True;True;True;True;True;True;True;True;True;True;True;True;True;True;True;True;True;True;True;True;True
Fibrinogen beta chain;Fibrinopeptide B;Fibrinogen beta chain	FGB	sp|P02675|FIBB_HUMAN Fibrinogen beta chain OS=Homo sapiens OX=9606 GN=FGB PE=1 SV=2;tr|D6REL8|D6REL8_HUMAN Fibrinogen beta chain OS=Homo sapiens OX=9606 GN=FGB PE=1 SV=1	22.0009	22.0009	26.8589	10	10	10	33.4	33.4	33.4	55.928	0	23.1	121710000	12	33.4		491	3	P02675;D6REL8;CON__P02676	P02675;D6REL8	10	10	10	10;6;1	10;6;1	10;6;1	True;True;True;True;True;True;True;True;True;True
Serum amyloid P-component;Serum amyloid P-component(1-203)	APCS	sp|P02743|SAMP_HUMAN Serum amyloid P-component OS=Homo sapiens OX=9606 GN=APCS PE=1 SV=2	21.5584	21.5584	24.8803	2	2	2	11.7	11.7	11.7	25.387	0	2.5698	30883000	2	11.7	223	223	1	P02743	P02743	2	2	2	2	2	2	True;True
Complement C1q subcomponent subunit A	C1QA	sp|P02745|C1QA_HUMAN Complement C1q subcomponent subunit A OS=Homo sapiens OX=9606 GN=C1QA PE=1 SV=2;tr|X6RLJ0|X6RLJ0_HUMAN Complement C1q subcomponent subunit A (Fragment) OS=Homo sapiens OX=9606 GN=C1QA PE=1 SV=7	23.5609	23.5609	27.2614	4	4	4	18.4	18.4	18.4	26.016	0	21.571	160880000	8	18.4		245	2	P02745;X6RLJ0	P02745;X6RLJ0	4	4	4	4;3	4;3	4;3	True;True;True;True
Complement C1q subcomponent subunit C	C1QC	sp|P02747|C1QC_HUMAN Complement C1q subcomponent subunit C OS=Homo sapiens OX=9606 GN=C1QC PE=1 SV=3	24.8956	24.8956	28.596	7	7	7	36.3	36.3	36.3	25.773	0	82.181	405750000	16	36.3	245	245	1	P02747	P02747	7	7	7	7	7	7	True;True;True;True;True;True;True
Beta-2-glycoprotein 1	APOH	sp|P02749|APOH_HUMAN Beta-2-glycoprotein 1 OS=Homo sapiens OX=9606 GN=APOH PE=1 SV=3;tr|J3QLI0|J3QLI0_HUMAN Beta-2-glycoprotein 1 (Fragment) OS=Homo sapiens OX=9606 GN=APOH PE=1 SV=1	26.0613	26.0613	30.1487	17	17	17	67.5	67.5	67.5	38.298	0	298.23	1190300000	39	67.5		345	5	P02749;J3QLI0;J3QRN2;J3KS17;CON__P17690	P02749;J3QLI0	17	17	17	17;9;8;5;3	17;9;8;5;3	17;9;8;5;3	True;True;True;True;True;True;True;True;True;True;True;True;True;True;True;True;True
Leucine-rich alpha-2-glycoprotein	LRG1	sp|P02750|A2GL_HUMAN Leucine-rich alpha-2-glycoprotein OS=Homo sapiens OX=9606 GN=LRG1 PE=1 SV=2	17.9671	17.9671	22.0545	2	2	2	4.9	4.9	4.9	38.177	0	2.4034	4355900	2	4.9	347	347	1	P02750	P02750	2	2	2	2	2	2	True;True
Fibronectin;Anastellin;Ugl-Y1;Ugl-Y2;Ugl-Y3	FN1	sp|P02751|FINC_HUMAN Fibronectin OS=Homo sapiens OX=9606 GN=FN1 PE=1 SV=4;tr|H0Y7Z1|H0Y7Z1_HUMAN Fibronectin (Fragment) OS=Homo sapiens OX=9606 GN=FN1 PE=1 SV=1	19.3464	19.3464	25.9314	7	7	7	4.3	4.3	4.3	262.62	0	8.8627	63993000	8	4.3		2386	2	P02751;H0Y7Z1	P02751;H0Y7Z1	7	7	7	7;5	7;5	7;5	True;True;True;True;True;True;True
Protein AMBP;Alpha-1-microglobulin;Inter-alpha-trypsin inhibitor light chain;Trypstatin	AMBP	sp|P02760|AMBP_HUMAN Protein AMBP OS=Homo sapiens OX=9606 GN=AMBP PE=1 SV=1;tr|S4R471|S4R471_HUMAN Protein AMBP (Fragment) OS=Homo sapiens OX=9606 GN=AMBP PE=1 SV=1;tr|S4R3Y4|S4R3Y4_HUMAN Protein AMBP OS=Homo sapiens OX=9606 GN=AMBP PE=1 SV=1	23.4248	23.4248	27.4249	6	6	6	20.2	20.2	20.2	38.999	0	18.932	180180000	9	20.2		352	3	P02760;S4R471;S4R3Y4	P02760;S4R471;S4R3Y4	6	6	6	6;4;4	6;4;4	6;4;4	True;True;True;True;True;True
Alpha-1-acid glycoprotein 1	ORM1	sp|P02763|A1AG1_HUMAN Alpha-1-acid glycoprotein 1 OS=Homo sapiens OX=9606 GN=ORM1 PE=1 SV=1	27.5231	27.5231	30.8451	10	10	6	43.3	43.3	32.8	23.511	0	50.503	1928800000	35	43.3	201	201	1	P02763	P02763	6	10	10	6	10	10	True;True;True;True;True;True;True;True;True;True
Transthyretin	TTR	sp|P02766|TTHY_HUMAN Transthyretin OS=Homo sapiens OX=9606 GN=TTR PE=1 SV=1;tr|A0A087WV45|A0A087WV45_HUMAN Transthyretin OS=Homo sapiens OX=9606 GN=TTR PE=1 SV=1;tr|A0A087WT59|A0A087WT59_HUMAN Transthyretin OS=Homo sapiens OX=9606 GN=TTR PE=1 SV=1	25.5294	25.5294	28.1144	8	8	8	69.4	69.4	69.4	15.887	0	117.29	290590000	13	69.4		147	3	P02766;A0A087WV45;A0A087WT59	P02766;A0A087WV45;A0A087WT59	8	8	8	8;6;6	8;6;6	8;6;6	True;True;True;True;True;True;True;True
Serotransferrin	TF	sp|P02787|TRFE_HUMAN Serotransferrin OS=Homo sapiens OX=9606 GN=TF PE=1 SV=3	25.5821	25.5821	30.904	40	40	40	63.2	63.2	63.2	77.063	0	323.31	2009200000	75	63.2		698	7	P02787;F8WCI6;C9JVG0;F8WEK9;H7C5E8;C9JB55;F8WC57	P02787	40	40	40	40;6;6;5;5;4;2	40;6;6;5;5;4;2	40;6;6;5;5;4;2	True;True;True;True;True;True;True;True;True;True;True;True;True;True;True;True;True;True;True;True;True;True;True;True;True;True;True;True;True;True;True;True;True;True;True;True;True;True;True;True
Hemopexin	HPX	sp|P02790|HEMO_HUMAN Hemopexin OS=Homo sapiens OX=9606 GN=HPX PE=1 SV=2	25.7338	25.7338	30.1933	19	19	19	56.1	56.1	56.1	51.676	0	157.65	1227700000	41	56.1		462	2	P02790;Q9BS19	P02790	19	19	19	19;7	19;7	19;7	True;True;True;True;True;True;True;True;True;True;True;True;True;True;True;True;True;True;True
C4b-binding protein alpha chain	C4BPA	sp|P04003|C4BPA_HUMAN C4b-binding protein alpha chain OS=Homo sapiens OX=9606 GN=C4BPA PE=1 SV=2;tr|A6PVY5|A6PVY5_HUMAN C4b-binding protein alpha chain (Fragment) OS=Homo sapiens OX=9606 GN=C4BPA PE=1 SV=1	18.7625	18.7625	23.6694	2	2	2	4	4	4	67.033	0.0047619	1.4	13341000	2	4		597	2	P04003;A6PVY5	P04003;A6PVY5	2	2	2	2;1	2;1	2;1	True;True
Vitronectin;Vitronectin V65 subunit;Vitronectin V10 subunit;Somatomedin-B	VTN	sp|P04004|VTNC_HUMAN Vitronectin OS=Homo sapiens OX=9606 GN=VTN PE=1 SV=1	24.0344	24.0344	28.2823	8	8	8	21.5	21.5	21.5	54.305	0	52.905	326460000	17	21.5		478	4	P04004;F5GX75;H0YJW9;CON__Q3ZBS7	P04004	8	8	8	8;1;1;1	8;1;1;1	8;1;1;1	True;True;True;True;True;True;True;True
Histidine-rich glycoprotein	HRG	sp|P04196|HRG_HUMAN Histidine-rich glycoprotein OS=Homo sapiens OX=9606 GN=HRG PE=1 SV=1	21.1438	21.1438	25.6032	3	3	3	7	7	7	59.578	0	4.3528	50973000	3	7	525	525	1	P04196	P04196	3	3	3	3	3	3	True;True;True
Ig lambda chain V region 4A		sp|P04211|LV743_HUMAN Immunoglobulin lambda variable 7-43 OS=Homo sapiens OX=9606 GN=IGLV7-43 PE=3 SV=2	21.2321	21.2321	23.2321	3	1	1	21.4	7.7	7.7	12.451	0.048193	0.86698	9852700	1	21.4	117	117	1	P04211	P04211	1	1	3	1	1	3	True;False;False
Alpha-1B-glycoprotein	A1BG	sp|P04217|A1BG_HUMAN Alpha-1B-glycoprotein OS=Homo sapiens OX=9606 GN=A1BG PE=1 SV=4	24.2399	24.2399	28.1467	9	9	9	27.1	27.1	27.1	54.253	0	51.967	297170000	14	27.1		495	3	P04217;M0R009;CON__Q2KJF1	P04217	9	9	9	9;4;1	9;4;1	9;4;1	True;True;True;True;True;True;True;True;True
Ig kappa chain V-I region BAN		sp|P04430|KV116_HUMAN Immunoglobulin kappa variable 1-16 OS=Homo sapiens OX=9606 GN=IGKV1-16 PE=1 SV=2	26.7087	26.7087	28.7088	2	2	2	29.1	29.1	29.1	12.618	0	121.9	438740000	12	29.1	117	117	1	P04430	P04430	2	2	2	2	2	2	True;True
Protein S100-A8;Protein S100-A8, N-terminally processed	S100A8	sp|P05109|S10A8_HUMAN Protein S100-A8 OS=Homo sapiens OX=9606 GN=S100A8 PE=1 SV=1	23.7718	23.7718	26.7718	2	2	2	23.7	23.7	23.7	10.834	0	44.744	114580000	6	23.7	93	93	1	P05109	P05109	2	2	2	2	2	2	True;True
Ig kappa chain V-II region RPMI 6410	IGKV2D-30	sp|P06310|KV230_HUMAN Immunoglobulin kappa variable 2-30 OS=Homo sapiens OX=9606 GN=IGKV2-30 PE=3 SV=2;sp|A0A075B6S6|KVD30_HUMAN Immunoglobulin kappa variable 2D-30 OS=Homo sapiens OX=9606 GN=IGKV2D-30 PE=3 SV=1	28.1036	28.1036	30.1036	6	4	4	44.2	41.7	41.7	13.185	0	45.156	1153700000	19	44.2		120	2	P06310;A0A075B6S6	P06310;A0A075B6S6	4	4	6	4;1	4;1	6;3	True;False;False;True;True;True
Ig kappa chain V-IV region	IGKV4-1	sp|P06312|KV401_HUMAN Immunoglobulin kappa variable 4-1 OS=Homo sapiens OX=9606 GN=IGKV4-1 PE=1 SV=1	29.8622	29.8622	31.8622	4	4	4	29.8	29.8	29.8	13.38	0	85.785	3903600000	20	29.8	121	121	1	P06312	P06312	4	4	4	4	4	4	True;True;True;True
Protein S100-A9	S100A9	sp|P06702|S10A9_HUMAN Protein S100-A9 OS=Homo sapiens OX=9606 GN=S100A9 PE=1 SV=1	24.7828	24.7828	27.5901	4	4	4	38.6	38.6	38.6	13.242	0	13.959	202050000	10	38.6	114	114	1	P06702	P06702	4	4	4	4	4	4	True;True;True;True
Protein S100;Protein S100-A6	S100A6	tr|R4GN98|R4GN98_HUMAN Protein S100 (Fragment) OS=Homo sapiens OX=9606 GN=S100A6 PE=1 SV=1;sp|P06703|S10A6_HUMAN Protein S100-A6 OS=Homo sapiens OX=9606 GN=S100A6 PE=1 SV=1	22.7088	22.7088	25.0307	1	1	1	20	20	20	9.681	0	9.1378	34276000	2	20		85	2	R4GN98;P06703	R4GN98;P06703	1	1	1	1;1	1;1	1;1	TRUE
Apolipoprotein A-IV	APOA4	sp|P06727|APOA4_HUMAN Apolipoprotein A-IV OS=Homo sapiens OX=9606 GN=APOA4 PE=1 SV=3	18.387	18.387	23.0309	1	1	1	3.5	3.5	3.5	45.398	0	4.5811	8569900	1	3.5	396	396	1	P06727	P06727	1	1	1	1	1	1	TRUE
Histone H1.0;Histone H1.0, N-terminally processed	H1F0	sp|P07305|H10_HUMAN Histone H1.0 OS=Homo sapiens OX=9606 GN=H1F0 PE=1 SV=3	18.9172	18.9172	21.5021	1	1	1	6.7	6.7	6.7	20.863	0.05	0.77516	2970200	1	6.7	194	194	1	P07305	P07305	1	1	1	1	1	1	TRUE
Complement factor H	CFH	sp|P08603|CFAH_HUMAN Complement factor H OS=Homo sapiens OX=9606 GN=CFH PE=1 SV=4;tr|Q5TFM2|Q5TFM2_HUMAN Complement factor H OS=Homo sapiens OX=9606 GN=CFH PE=1 SV=1;tr|A0A0D9SG88|A0A0D9SG88_HUMAN Complement factor H OS=Homo sapiens OX=9606 GN=CFH PE=1 SV=	17.6137	17.6137	23.5444	3	2	2	2.8	2	2	139.09	0	2.9169	12234000	3	2.8		1231	3	P08603;Q5TFM2;A0A0D9SG88	P08603;Q5TFM2;A0A0D9SG88	2	2	3	2;2;2	2;2;2	3;2;2	False;True;True
Vimentin	VIM	sp|P08670|VIME_HUMAN Vimentin OS=Homo sapiens OX=9606 GN=VIM PE=1 SV=4	16.9229	16.9229	21.9229	1	1	1	4.5	4.5	4.5	53.651	0.092652	0.64169	3976000	1	4.5	466	466	1	P08670	P08670	1	1	1	1	1	1	TRUE
Serum amyloid A-1 protein;Amyloid protein A;Serum amyloid protein A(2-104);Serum amyloid protein A(3-104);Serum amyloid protein A(2-103);Serum amyloid protein A(2-102);Serum amyloid protein A(4-101);Serum amyloid A protein	SAA1	sp|P0DJI8|SAA1_HUMAN Serum amyloid A-1 protein OS=Homo sapiens OX=9606 GN=SAA1 PE=1 SV=1;tr|E9PQD6|E9PQD6_HUMAN Serum amyloid A protein OS=Homo sapiens OX=9606 GN=SAA1 PE=1 SV=1	24.2238	24.2238	27.0312	6	3	3	66.4	43.4	43.4	13.532	0	49.368	137150000	7	66.4		122	2	P0DJI8;E9PQD6	P0DJI8;E9PQD6	3	3	6	3;2	3;2	6;5	False;False;True;True;False;True
Serum amyloid A-2 protein	SAA2	sp|P0DJI9|SAA2_HUMAN Serum amyloid A-2 protein OS=Homo sapiens OX=9606 GN=SAA2 PE=1 SV=1				4	1	1	36.1	13.1	13.1	13.527	0	3.7958	0	1	36.1	122	122	1	P0DJI9	P0DJI9	1	1	4	1	1	4	False;False;True;False
		sp|P0DOY2|IGLC2_HUMAN Immunoglobulin lambda constant 2 OS=Homo sapiens OX=9606 GN=IGLC2 PE=1 SV=1	33.5553	33.5553	36.3627	17	17	0	96.2	96.2	0	11.293	0	323.31	88363000000	167	96.2	106	106	1	P0DOY2	P0DOY2	0	17	17	0	17	17	True;True;True;True;True;True;True;True;True;True;True;True;True;True;True;True;True
		sp|P0DOY3|IGLC3_HUMAN Immunoglobulin lambda constant 3 OS=Homo sapiens OX=9606 GN=IGLC3 PE=1 SV=1	20.1021	20.1021	22.9094	15	1	1	96.2	17	17	11.265	0.096273	0.63453	7878200	1	96.2	106	106	1	P0DOY3	P0DOY3	1	1	15	1	1	15	False;False;False;False;False;False;False;False;False;False;True;False;False;False;False
		sp|P0DP02|HVC33_HUMAN Immunoglobulin heavy variable 3-30-3 OS=Homo sapiens OX=9606 GN=IGHV3-30-3 PE=3 SV=1	22.4058	22.4058	25.2132	6	1	1	38.5	16.2	16.2	12.989	0	9.867	38897000	3	38.5		117	2	P0DP02;A0A075B6Q5	P0DP02	1	1	6	1;1	1;1	6;1	False;False;False;True;False;False
		sp|P0DP04|HV43D_HUMAN Immunoglobulin heavy variable 3-43D OS=Homo sapiens OX=9606 GN=IGHV3-43D PE=3 SV=1	22.4641	22.4641	25.0491	4	1	0	38.1	12.7	0	13.017	0	3.8006	34715000	2	38.1	118	118	1	P0DP04	P0DP04	0	1	4	0	1	4	False;True;False;False
Clusterin;Clusterin beta chain;Clusterin alpha chain;Clusterin	CLU	sp|P10909|CLUS_HUMAN Clusterin OS=Homo sapiens OX=9606 GN=CLU PE=1 SV=1;tr|H0YC35|H0YC35_HUMAN Clusterin (Fragment) OS=Homo sapiens OX=9606 GN=CLU PE=1 SV=1;tr|H0YLK8|H0YLK8_HUMAN Clusterin (Fragment) OS=Homo sapiens OX=9606 GN=CLU PE=1 SV=1	23.1223	23.1223	27.3702	7	7	7	23.8	23.8	23.8	52.494	0	61.106	173480000	12	23.8		449	10	P10909;H0YC35;H0YLK8;H0YAS8;E7ERK6;E5RG36;E5RGB0;E5RH61;E5RJZ5;E7ETB4	P10909;H0YC35;H0YLK8	7	7	7	7;5;4;2;2;1;1;1;1;1	7;5;4;2;2;1;1;1;1;1	7;5;4;2;2;1;1;1;1;1	True;True;True;True;True;True;True
Low affinity immunoglobulin gamma Fc region receptor II-a	FCGR2A	tr|V9GY83|V9GY83_HUMAN Low affinity immunoglobulin gamma Fc region receptor II-a (Fragment) OS=Homo sapiens OX=9606 GN=FCGR2A PE=1 SV=1;sp|P12318|FCG2A_HUMAN Low affinity immunoglobulin gamma Fc region receptor II-a OS=Homo sapiens OX=9606 GN=FCGR2A PE=1 S	24.7045	24.7045	26.2895	3	3	3	31.1	31.1	31.1	21.467	0	10.79	82020000	4	31.1		190	8	V9GY83;P12318;F5GXY9;F5GX41;A0A087WXE5;H0YGT0;P31994;P31995	V9GY83;P12318;F5GXY9;F5GX41	3	3	3	3;3;2;2;1;1;1;1	3;3;2;2;1;1;1;1	3;3;2;2;1;1;1;1	True;True;True
Delta-aminolevulinic acid dehydratase	ALAD	sp|P13716|HEM2_HUMAN Delta-aminolevulinic acid dehydratase OS=Homo sapiens OX=9606 GN=ALAD PE=1 SV=1	22.2594	22.2594	26.1663	1	1	1	4.8	4.8	4.8	36.294	0.09396	0.66465	75307000	2	4.8	330	330	1	P13716	P13716	1	1	1	1	1	1	TRUE
Immunoglobulin lambda-like polypeptide 1	IGLL1	sp|P15814|IGLL1_HUMAN Immunoglobulin lambda-like polypeptide 1 OS=Homo sapiens OX=9606 GN=IGLL1 PE=1 SV=1	22.205	22.205	25.6644	2	1	1	10.8	7	7	22.963	0	67.456	53182000	4	10.8	213	213	1	P15814	P15814	1	1	2	1	1	2	False;True
Histone H1.5	HIST1H1B	sp|P16401|H15_HUMAN Histone H1.5 OS=Homo sapiens OX=9606 GN=HIST1H1B PE=1 SV=3	21.0488	21.0488	24.3707	2	2	2	13.7	13.7	13.7	22.58	0	2.1283	21693000	2	13.7	226	226	1	P16401	P16401	2	2	2	2	2	2	True;True
Histone H1.2;Histone H1.4;Histone H1.3	HIST1H1C;HIST1H1E;HIST1H1D	sp|P16403|H12_HUMAN Histone H1.2 OS=Homo sapiens OX=9606 GN=HIST1H1C PE=1 SV=2;sp|P10412|H14_HUMAN Histone H1.4 OS=Homo sapiens OX=9606 GN=HIST1H1E PE=1 SV=2;sp|P16402|H13_HUMAN Histone H1.3 OS=Homo sapiens OX=9606 GN=HIST1H1D PE=1 SV=2	24.5791	24.5791	28.0385	6	6	6	24.9	24.9	24.9	21.364	0	12.38	275690000	13	24.9		213	5	P16403;P10412;P16402;P22492;Q02539	P16403;P10412;P16402	6	6	6	6;5;5;2;2	6;5;5;2;2	6;5;5;2;2	True;True;True;True;True;True
Alpha-1-acid glycoprotein 2	ORM2	sp|P19652|A1AG2_HUMAN Alpha-1-acid glycoprotein 2 OS=Homo sapiens OX=9606 GN=ORM2 PE=1 SV=2	25.4868	25.4868	28.8088	8	4	4	31.3	20.9	20.9	23.602	0	54.282	470220000	10	31.3	201	201	1	P19652	P19652	4	4	8	4	4	8	False;False;False;True;True;True;False;True
Zinc-alpha-2-glycoprotein	AZGP1	sp|P25311|ZA2G_HUMAN Zinc-alpha-2-glycoprotein OS=Homo sapiens OX=9606 GN=AZGP1 PE=1 SV=2	23.0495	23.0495	27.2194	5	5	5	25.5	25.5	25.5	34.258	0	29.92	156260000	6	25.5		298	3	P25311;C9JEV0;H7BZJ8	P25311	5	5	5	5;2;1	5;2;1	5;2;1	True;True;True;True;True
Protein-lysine 6-oxidase	LOX	sp|P28300|LYOX_HUMAN Protein-lysine 6-oxidase OS=Homo sapiens OX=9606 GN=LOX PE=1 SV=2	20.051	20.051	24.051	1	1	1	4.1	4.1	4.1	46.944	0	1.6253	17381000	1	4.1	417	417	1	P28300	P28300	1	1	1	1	1	1	TRUE
		P3_A0301	30.0946	30.0946	34.4166	28	28	18	70.4	70.4	41.6	40.84	0	323.31	22931000000	190	70.4	365	365	1	P3_A0301	P3_A0301	18	28	28	18	28	28	True;True;True;True;True;True;True;True;True;True;True;True;True;True;True;True;True;True;True;True;True;True;True;True;True;True;True;True
		P3_A3301	27.3471	27.3471	31.595	20	10	10	64.9	37	37	40.919	0	291.71	3243600000	50	64.9	365	365	1	P3_A3301	P3_A3301	10	10	20	10	10	20	True;False;False;False;True;False;False;False;True;True;False;True;False;True;True;False;True;True;True;False
		P3_B1801	28.8362	28.8362	32.9236	23	11	7	68.5	29	22.4	40.274	0	173.14	8147000000	90	68.5	362	362	1	P3_B1801	P3_B1801	7	11	23	7	11	23	True;False;True;True;True;False;False;False;False;False;True;False;False;True;True;True;True;False;False;False;True;True;False
		P3_B5301	29.0628	29.0628	33.1503	24	17	6	69.6	53.3	21.8	40.495	0	323.31	9533100000	73	69.6	362	362	1	P3_B5301	P3_B5301	6	17	24	6	17	24	True;True;True;True;False;True;True;True;True;False;True;True;True;True;False;True;True;True;False;False;True;True;False;False
		P3_C0401	25.8182	25.8182	29.7251	21	12	8	54.9	37.4	16.9	40.994	0	191.02	887440000	34	54.9	366	366	1	P3_C0401	P3_C0401	8	12	21	8	12	21	False;False;True;True;False;False;False;True;True;True;True;True;True;False;True;False;False;True;True;False;True
		P3_C0501	23.6697	23.6697	27.7571	17	6	6	55.7	12.8	12.8	40.912	0	99.184	226840000	12	55.7	366	366	1	P3_C0501	P3_C0501	6	6	17	6	6	17	True;True;True;False;False;False;False;False;False;False;False;True;False;False;True;True;False
Protein S100-A7;Protein S100-A7A	S100A7;S100A7A	sp|P31151|S10A7_HUMAN Protein S100-A7 OS=Homo sapiens OX=9606 GN=S100A7 PE=1 SV=4;sp|Q86SG5|S1A7A_HUMAN Protein S100-A7A OS=Homo sapiens OX=9606 GN=S100A7A PE=1 SV=3	20.2876	20.2876	23.0949	2	2	2	29.7	29.7	29.7	11.471	0	10.734	8959000	2	29.7		101	2	P31151;Q86SG5	P31151;Q86SG5	2	2	2	2;1	2;1	2;1	True;True
Protein S100-A11;Protein S100-A11, N-terminally processed	S100A11	sp|P31949|S10AB_HUMAN Protein S100-A11 OS=Homo sapiens OX=9606 GN=S100A11 PE=1 SV=2	22.7659	22.7659	25.0878	3	3	3	28.6	28.6	28.6	11.74	0	3.4388	35661000	4	28.6	105	105	1	P31949	P31949	3	3	3	3	3	3	True;True;True
Merlin	NF2	sp|P35240|MERL_HUMAN Merlin OS=Homo sapiens OX=9606 GN=NF2 PE=1 SV=1				1	1	1	2.5	2.5	2.5	69.689	0.05098	0.80547	0	1	2.5	595	595	1	P35240	P35240	1	1	1	1	1	1	TRUE
40S ribosomal protein S19	RPS19	sp|P39019|RS19_HUMAN 40S ribosomal protein S19 OS=Homo sapiens OX=9606 GN=RPS19 PE=1 SV=2;tr|M0R2L9|M0R2L9_HUMAN 40S ribosomal protein S19 (Fragment) OS=Homo sapiens OX=9606 GN=RPS19 PE=1 SV=1;tr|M0QXK4|M0QXK4_HUMAN 40S ribosomal protein S19 (Fragment) OS=	21.0622	21.0622	24.3841	3	3	3	22.8	22.8	22.8	16.06	0	2.8553	21895000	4	22.8		145	6	P39019;M0R2L9;M0QXK4;M0QYF7;M0R140;A0A075B6E2	P39019;M0R2L9;M0QXK4;M0QYF7;M0R140	3	3	3	3;2;2;2;2;1	3;2;2;2;2;1	3;2;2;2;2;1	True;True;True
Afamin	AFM	sp|P43652|AFAM_HUMAN Afamin OS=Homo sapiens OX=9606 GN=AFM PE=1 SV=1	16.5031	16.5031	21.7126	1	1	1	1.8	1.8	1.8	69.068	0.096346	0.66014	3436600	1	1.8	599	599	1	P43652	P43652	1	1	1	1	1	1	TRUE
Inward rectifier potassium channel 4	KCNJ4	sp|P48050|KCNJ4_HUMAN Inward rectifier potassium channel 4 OS=Homo sapiens OX=9606 GN=KCNJ4 PE=1 SV=1	18.1948	18.1948	22.1017	1	1	1	7.6	7.6	7.6	49.5	0.1003	0.62962	4500800	0	7.6	445	445	1	P48050	P48050	1	1	1	1	1	1	TRUE
Stromal cell-derived factor 1;SDF-1-beta(3-72);SDF-1-alpha(3-67)	CXCL12	sp|P48061|SDF1_HUMAN Stromal cell-derived factor 1 OS=Homo sapiens OX=9606 GN=CXCL12 PE=1 SV=1	21.9169	21.9169	24.2388	3	3	3	34.4	34.4	34.4	10.666	0	12.529	19798000	2	34.4	93	93	1	P48061	P48061	3	3	3	3	3	3	True;True;True
Iron-responsive element-binding protein 2	IREB2	sp|P48200|IREB2_HUMAN Iron-responsive element-binding protein 2 OS=Homo sapiens OX=9606 GN=IREB2 PE=1 SV=4	24.7199	24.7199	30.1794	1	1	1	0.7	0.7	0.7	105.06	0.03139	1.0889	1215900000	2	0.7	963	963	1	P48200	P48200	1	1	1	1	1	1	TRUE
60S ribosomal protein L34	RPL34	sp|P49207|RL34_HUMAN 60S ribosomal protein L34 OS=Homo sapiens OX=9606 GN=RPL34 PE=1 SV=3	21.1007	21.1007	23.6857	1	1	1	9.4	9.4	9.4	13.293	0.088435	0.66966	13493000	1	9.4	117	117	1	P49207	P49207	1	1	1	1	1	1	TRUE
Protein-glutamine gamma-glutamyltransferase 4	TGM4	sp|P49221|TGM4_HUMAN Protein-glutamine gamma-glutamyltransferase 4 OS=Homo sapiens OX=9606 GN=TGM4 PE=1 SV=2	18.7303	18.7303	23.9782	1	1	1	1	1	1	77.144	0.078571	0.70676	16526000	1	1	684	684	1	P49221	P49221	1	1	1	1	1	1	TRUE
Very long-chain specific acyl-CoA dehydrogenase, mitochondrial	ACADVL	sp|P49748|ACADV_HUMAN Very long-chain specific acyl-CoA dehydrogenase, mitochondrial OS=Homo sapiens OX=9606 GN=ACADVL PE=1 SV=1	18.6538	18.6538	24.0114	1	1	1	5.6	5.6	5.6	70.389	0.1	0.62957	16910000	1	5.6	655	655	1	P49748	P49748	1	1	1	1	1	1	TRUE
Chloride channel protein ClC-Ka	CLCNKA	sp|P51800|CLCKA_HUMAN Chloride channel protein ClC-Ka OS=Homo sapiens OX=9606 GN=CLCNKA PE=1 SV=1	23.0248	23.0248	27.6097	1	1	1	2.6	2.6	2.6	75.284	0.05948	0.73866	204810000	1	2.6	687	687	1	P51800	P51800	1	1	1	1	1	1	TRUE
C-C motif chemokine 18;CCL18(1-68);CCL18(3-69);CCL18(4-69)	CCL18	sp|P55774|CCL18_HUMAN C-C motif chemokine 18 OS=Homo sapiens OX=9606 GN=CCL18 PE=1 SV=1	22.4304	22.4304	24.4303	1	1	1	24.7	24.7	24.7	9.8487	0.004878	1.5283	22608000	1	24.7	89	89	1	P55774	P55774	1	1	1	1	1	1	TRUE
Lysozyme C;Lysozyme	LYZ	sp|P61626|LYSC_HUMAN Lysozyme C OS=Homo sapiens OX=9606 GN=LYZ PE=1 SV=1;tr|F8VV32|F8VV32_HUMAN Lysozyme OS=Homo sapiens OX=9606 GN=LYZ PE=1 SV=1;tr|A0A0B4J259|A0A0B4J259_HUMAN Lysozyme OS=Homo sapiens OX=9606 GN=LYZ PE=1 SV=1	23.7679	23.7679	26.9378	5	5	5	47.3	47.3	47.3	16.537	0	24.795	128550000	5	47.3		148	3	P61626;F8VV32;A0A0B4J259	P61626;F8VV32;A0A0B4J259	5	5	5	5;3;3	5;3;3	5;3;3	True;True;True;True;True
Beta-2-microglobulin;Beta-2-microglobulin form pI 5.3	B2M	sp|P61769|B2MG_HUMAN Beta-2-microglobulin OS=Homo sapiens OX=9606 GN=B2M PE=1 SV=1;tr|H0YLF3|H0YLF3_HUMAN Beta-2-microglobulin (Fragment) OS=Homo sapiens OX=9606 GN=B2M PE=1 SV=1;tr|F5H6I0|F5H6I0_HUMAN Beta-2-microglobulin OS=Homo sapiens OX=9606 GN=B2M PE	32.6448	32.6448	35.2297	11	11	11	78.2	78.2	78.2	13.714	0	323.31	40291000000	70	78.2		119	3	P61769;H0YLF3;F5H6I0	P61769;H0YLF3;F5H6I0	11	11	11	11;7;7	11;7;7	11;7;7	True;True;True;True;True;True;True;True;True;True;True
Histone H4	HIST1H4A	sp|P62805|H4_HUMAN Histone H4 OS=Homo sapiens OX=9606 GN=HIST1H4A PE=1 SV=2	25.3199	25.3199	27.9049	4	4	4	39.8	39.8	39.8	11.367	0	11.816	251310000	12	39.8	103	103	1	P62805	P62805	4	4	4	4	4	4	True;True;True;True
40S ribosomal protein S25	RPS25	sp|P62851|RS25_HUMAN 40S ribosomal protein S25 OS=Homo sapiens OX=9606 GN=RPS25 PE=1 SV=1	22.1496	22.1496	24.4715	2	2	2	16	16	16	13.742	0	2.9317	23262000	3	16	125	125	1	P62851	P62851	2	2	2	2	2	2	True;True
Peptidyl-prolyl cis-trans isomerase A;Peptidyl-prolyl cis-trans isomerase A, N-terminally processed;Peptidyl-prolyl cis-trans isomerase	PPIA	sp|P62937|PPIA_HUMAN Peptidyl-prolyl cis-trans isomerase A OS=Homo sapiens OX=9606 GN=PPIA PE=1 SV=2;tr|F8WE65|F8WE65_HUMAN Peptidyl-prolyl cis-trans isomerase OS=Homo sapiens OX=9606 GN=PPIA PE=1 SV=1;tr|C9J5S7|C9J5S7_HUMAN Peptidyl-prolyl cis-trans isome				2	2	2	15.8	15.8	15.8	18.012	0	2.6031	0	2	15.8		165	3	P62937;F8WE65;C9J5S7	P62937;F8WE65;C9J5S7	2	2	2	2;1;1	2;1;1	2;1;1	True;True
Hemoglobin subunit beta;LVV-hemorphin-7;Spinorphin;Hemoglobin subunit delta	HBB;HBD	sp|P68871|HBB_HUMAN Hemoglobin subunit beta OS=Homo sapiens OX=9606 GN=HBB PE=1 SV=2;tr|F8W6P5|F8W6P5_HUMAN Hemoglobin subunit beta (Fragment) OS=Homo sapiens OX=9606 GN=HBB PE=1 SV=1;tr|A0A2R8Y7R2|A0A2R8Y7R2_HUMAN Hemoglobin subunit beta OS=Homo sapiens O	21.0502	21.0502	24.5097	2	2	2	17	17	17	15.998	0	2.1247	23886000	2	17		147	4	P68871;F8W6P5;A0A2R8Y7R2;P02042	P68871;F8W6P5;A0A2R8Y7R2;P02042	2	2	2	2;1;1;1	2;1;1;1	2;1;1;1	True;True
Hemoglobin subunit alpha	HBA1	sp|P69905|HBA_HUMAN Hemoglobin subunit alpha OS=Homo sapiens OX=9606 GN=HBA1 PE=1 SV=2;tr|A0A2R8Y7C0|A0A2R8Y7C0_HUMAN Hemoglobin subunit alpha (Fragment) OS=Homo sapiens OX=9606 GN=HBA2 PE=1 SV=1	23.2399	23.2399	26.2399	2	2	2	18.3	18.3	18.3	15.257	0	2.8253	79251000	3	18.3		142	2	P69905;A0A2R8Y7C0	P69905;A0A2R8Y7C0	2	2	2	2;1	2;1	2;1	True;True
Ig lambda chain V-III region LOI		sp|P80748|LV321_HUMAN Immunoglobulin lambda variable 3-21 OS=Homo sapiens OX=9606 GN=IGLV3-21 PE=1 SV=2	26.5029	26.5029	28.5029	3	1	1	48.7	25.6	25.6	12.446	0	52.053	380390000	10	48.7	117	117	1	P80748	P80748	1	1	3	1	1	3	False;False;True
Dermcidin;Survival-promoting peptide;DCD-1	DCD	sp|P81605|DCD_HUMAN Dermcidin OS=Homo sapiens OX=9606 GN=DCD PE=1 SV=2	20.7009	20.7009	23.0228	1	1	1	10	10	10	11.284	0.094771	0.65599	8522400	0	10	110	110	1	P81605	P81605	1	1	1	1	1	1	TRUE
Complement factor H-related protein 1	CFHR1	sp|Q03591|FHR1_HUMAN Complement factor H-related protein 1 OS=Homo sapiens OX=9606 GN=CFHR1 PE=1 SV=2;tr|B1AKG0|B1AKG0_HUMAN Complement factor H-related protein 1 OS=Homo sapiens OX=9606 GN=CFHR1 PE=1 SV=1	23.2319	23.2319	27.1388	7	7	4	27.9	27.9	13.3	37.65	0	73.464	147770000	15	27.9		330	3	Q03591;B1AKG0;Q9BXR6	Q03591;B1AKG0	4	7	7	4;3;1	7;6;1	7;6;1	True;True;True;True;True;True;True
Regenerating islet-derived protein 3-alpha;Regenerating islet-derived protein 3-alpha 16.5 kDa form;Regenerating islet-derived protein 3-alpha 15 kDa form	REG3A	sp|Q06141|REG3A_HUMAN Regenerating islet-derived protein 3-alpha OS=Homo sapiens OX=9606 GN=REG3A PE=1 SV=1	23.7158	23.7158	26.0377	1	1	1	8	8	8	19.395	0.023148	1.2483	68887000	1	8	175	175	1	Q06141	Q06141	1	1	1	1	1	1	TRUE
ATP-dependent RNA helicase A	DHX9	sp|Q08211|DHX9_HUMAN ATP-dependent RNA helicase A OS=Homo sapiens OX=9606 GN=DHX9 PE=1 SV=4	17.9752	17.9752	23.9059	1	1	1	0.7	0.7	0.7	140.96	0	1.9431	15718000	1	0.7	1270	1270	1	Q08211	Q08211	1	1	1	1	1	1	TRUE
Malectin	MLEC	sp|Q14165|MLEC_HUMAN Malectin OS=Homo sapiens OX=9606 GN=MLEC PE=1 SV=1	20.2518	20.2518	24.2518	1	1	1	11.3	11.3	11.3	32.233	0.097792	0.63824	19977000	0	11.3	292	292	1	Q14165	Q14165	1	1	1	1	1	1	TRUE
Inter-alpha-trypsin inhibitor heavy chain H4;70 kDa inter-alpha-trypsin inhibitor heavy chain H4;35 kDa inter-alpha-trypsin inhibitor heavy chain H4	ITIH4	sp|Q14624|ITIH4_HUMAN Inter-alpha-trypsin inhibitor heavy chain H4 OS=Homo sapiens OX=9606 GN=ITIH4 PE=1 SV=4	21.4222	21.4222	26.8817	14	1	1	19.9	1.2	1.2	103.36	0	1.9229	123650000	4	19.9	930	930	1	Q14624	Q14624	1	1	14	1	1	14	False;False;True;False;False;False;False;False;False;False;False;False;False;False
Nuclear factor of activated T-cells, cytoplasmic 4	NFATC4	sp|Q14934|NFAC4_HUMAN Nuclear factor of activated T-cells, cytoplasmic 4 OS=Homo sapiens OX=9606 GN=NFATC4 PE=1 SV=2	19.2334	19.2334	24.6257	1	1	1	2	2	2	95.448	0.057471	0.76688	25887000	2	2	902	902	1	Q14934	Q14934	1	1	1	1	1	1	TRUE
Histone H2A type 2-A;Histone H2A type 2-C;Histone H2A type 1-J;Histone H2A.J;Histone H2A type 1-H;Histone H2A type 1;Histone H2A type 1-D;Histone H2A;Histone H2A type 3;Histone H2A type 1-C;Histone H2A type 1-B/E	HIST2H2AA3;HIST2H2AC;HIST1H2AJ;H2AFJ;HIST1H2AH;HIST1H2AG;HIST1H2AD;HIST3H2A;HIST1H2AC;HIST1H2AB	sp|Q6FI13|H2A2A_HUMAN Histone H2A type 2-A OS=Homo sapiens OX=9606 GN=HIST2H2AA3 PE=1 SV=3;sp|Q16777|H2A2C_HUMAN Histone H2A type 2-C OS=Homo sapiens OX=9606 GN=HIST2H2AC PE=1 SV=4;tr|A0A0U1RR32|A0A0U1RR32_HUMAN Histone H2A OS=Homo sapiens OX=9606 GN=hCG_2	25.6598	25.6598	27.9817	5	5	5	57.7	57.7	57.7	14.095	0	25.618	265060000	8	57.7		130	22	Q6FI13;Q16777;A0A0U1RR32;Q99878;Q9BTM1;A0A0U1RRH7;Q96KK5;P0C0S8;P20671;H0YFX9;Q7L7L0;Q93077;P04908;P0C0S5;Q96QV6;P16104;Q71UI9;A0A494C189;C9J0D1;A0A3B3IS11;C9J386;Q8IUE6	Q6FI13;Q16777;A0A0U1RR32;Q99878;Q9BTM1;A0A0U1RRH7;Q96KK5;P0C0S8;P20671;H0YFX9;Q7L7L0;Q93077;P04908	5	5	5	5;5;4;4;4;4;4;4;4;3;3;3;3;2;2;2;2;2;2;2;1;1	5;5;4;4;4;4;4;4;4;3;3;3;3;2;2;2;2;2;2;2;1;1	5;5;4;4;4;4;4;4;4;3;3;3;3;2;2;2;2;2;2;2;1;1	True;True;True;True;True
	HLA-G2.2	tr|Q31611|Q31611_HUMAN B2 microglobulin OS=Homo sapiens OX=9606 GN=HLA-G PE=1 SV=1	18.856	18.856	22.6634	2	1	1	15	9.8	9.8	27.68	0	4.1428	6643000	1	15	246	246	1	Q31611	Q31611	1	1	2	1	1	2	True;False
Uncharacterized protein C6orf132	C6orf132	sp|Q5T0Z8|CF132_HUMAN Uncharacterized protein C6orf132 OS=Homo sapiens OX=9606 GN=C6orf132 PE=1 SV=4	21.7997	21.7997	27.7066	1	1	1	3.4	3.4	3.4	124.03	0.096573	0.63622	219030000	1	3.4	1188	1188	1	Q5T0Z8	Q5T0Z8	1	1	1	1	1	1	TRUE
Protein argonaute;Protein argonaute-1;Protein argonaute-4	AGO1;AGO4	tr|Q5TA58|Q5TA58_HUMAN Protein argonaute-1 OS=Homo sapiens OX=9606 GN=AGO1 PE=1 SV=1;sp|Q9UL18|AGO1_HUMAN Protein argonaute-1 OS=Homo sapiens OX=9606 GN=AGO1 PE=1 SV=3;sp|Q9HCK5|AGO4_HUMAN Protein argonaute-4 OS=Homo sapiens OX=9606 GN=AGO4 PE=1 SV=2	18.8886	18.8886	24.2462	1	1	1	1.4	1.4	1.4	88.878	0.050781	0.80494	19899000	0	1.4		782	3	Q5TA58;Q9UL18;Q9HCK5	Q5TA58;Q9UL18;Q9HCK5	1	1	1	1;1;1	1;1;1	1;1;1	TRUE
Uncharacterized protein C9orf131	C9orf131	sp|Q5VYM1|CI131_HUMAN Uncharacterized protein C9orf131 OS=Homo sapiens OX=9606 GN=C9orf131 PE=2 SV=3	17.351	17.351	22.8104	1	1	1	3.2	3.2	3.2	117.72	0.10241	0.62954	7355700	0	3.2	1079	1079	1	Q5VYM1	Q5VYM1	1	1	1	1	1	1	TRUE
Uncharacterized protein C18orf63	C18orf63	sp|Q68DL7|CR063_HUMAN Uncharacterized protein C18orf63 OS=Homo sapiens OX=9606 GN=C18orf63 PE=2 SV=2	19.3523	19.3523	24.8117	1	1	1	1	1	1	77.23	0.04329	0.97509	29448000	1	1	685	685	1	Q68DL7	Q68DL7	1	1	1	1	1	1	TRUE
Metal transporter CNNM4;Metal transporter CNNM2	CNNM4;CNNM2	sp|Q6P4Q7|CNNM4_HUMAN Metal transporter CNNM4 OS=Homo sapiens OX=9606 GN=CNNM4 PE=1 SV=3;sp|Q9H8M5|CNNM2_HUMAN Metal transporter CNNM2 OS=Homo sapiens OX=9606 GN=CNNM2 PE=1 SV=2	20.0576	20.0576	25.3795	1	1	1	0.9	0.9	0.9	86.606	0.085324	0.67347	43651000	1	0.9		775	2	Q6P4Q7;Q9H8M5	Q6P4Q7;Q9H8M5	1	1	1	1;1	1;1	1;1	TRUE
Serine/threonine-protein kinase ULK3	ULK3	sp|Q6PHR2|ULK3_HUMAN Serine/threonine-protein kinase ULK3 OS=Homo sapiens OX=9606 GN=ULK3 PE=1 SV=2	25.4354	25.4354	29.9589	1	1	1	1.5	1.5	1.5	53.444	0.035556	1.0706	1043600000	4	1.5	472	472	1	Q6PHR2	Q6PHR2	1	1	1	1	1	1	TRUE
Coiled-coil domain-containing protein 73	CCDC73	sp|Q6ZRK6|CCD73_HUMAN Coiled-coil domain-containing protein 73 OS=Homo sapiens OX=9606 GN=CCDC73 PE=2 SV=2	19.6925	19.6925	25.7799	1	1	1	1.4	1.4	1.4	124.15	0	2.3301	57613000	2	1.4	1079	1079	1	Q6ZRK6	Q6ZRK6	1	1	1	1	1	1	TRUE
Uncharacterized protein KIAA0408	KIAA0408	sp|Q6ZU52|K0408_HUMAN Uncharacterized protein KIAA0408 OS=Homo sapiens OX=9606 GN=KIAA0408 PE=1 SV=1	17.8228	17.8228	23.1804	1	1	1	5	5	5	79.162	0.10089	0.62714	9505800	1	5	694	694	1	Q6ZU52	Q6ZU52	1	1	1	1	1	1	TRUE
Putative chemokine-related protein FP248	FP248	sp|Q71RG6|YH006_HUMAN Putative chemokine-related protein FP248 OS=Homo sapiens OX=9606 GN=FP248 PE=5 SV=1	25.0134	25.0134	27.3353	1	1	1	13.9	13.9	13.9	21.376	0.069853	0.72788	169340000	4	13.9	208	208	1	Q71RG6	Q71RG6	1	1	1	1	1	1	TRUE
Transcription elongation factor SPT6	SUPT6H	sp|Q7KZ85|SPT6H_HUMAN Transcription elongation factor SPT6 OS=Homo sapiens OX=9606 GN=SUPT6H PE=1 SV=2	17.7846	17.7846	24.07	1	1	1	1.1	1.1	1.1	199.07	0.094937	0.63942	17611000	0	1.1	1726	1726	1	Q7KZ85	Q7KZ85	1	1	1	1	1	1	TRUE
SH3 domain-binding protein 5-like	SH3BP5L	sp|Q7L8J4|3BP5L_HUMAN SH3 domain-binding protein 5-like OS=Homo sapiens OX=9606 GN=SH3BP5L PE=1 SV=1	19.5842	19.5842	24.0437	1	1	1	3.1	3.1	3.1	43.499	0.1	0.62663	17293000	0	3.1	393	393	1	Q7L8J4	Q7L8J4	1	1	1	1	1	1	TRUE
NXPE family member 1	NXPE1	sp|Q8N323|NXPE1_HUMAN NXPE family member 1 OS=Homo sapiens OX=9606 GN=NXPE1 PE=2 SV=2				1	1	1	1.8	1.8	1.8	63.177	0.022936	1.1809	0	1	1.8	547	547	1	Q8N323	Q8N323	1	1	1	1	1	1	TRUE
Transmembrane protein 251	TMEM251	sp|Q8N6I4|TM251_HUMAN Transmembrane protein 251 OS=Homo sapiens OX=9606 GN=TMEM251 PE=2 SV=4				1	1	1	4.3	4.3	4.3	18.747	0.043478	0.98848	0	2	4.3	163	163	1	Q8N6I4	Q8N6I4	1	1	1	1	1	1	TRUE
Uncharacterized protein KIAA1958	KIAA1958	sp|Q8N8K9|K1958_HUMAN Uncharacterized protein KIAA1958 OS=Homo sapiens OX=9606 GN=KIAA1958 PE=1 SV=1	18.976	18.976	23.7309	1	1	1	1.8	1.8	1.8	79.211	0.023041	1.1813	13922000	1	1.8	716	716	1	Q8N8K9	Q8N8K9	1	1	1	1	1	1	TRUE
Interleukin-17 receptor C	IL17RC	sp|Q8NAC3|I17RC_HUMAN Interleukin-17 receptor C OS=Homo sapiens OX=9606 GN=IL17RC PE=1 SV=2				1	1	1	1	1	1	86.239	0.079422	0.70946	0	1	1	791	791	1	Q8NAC3	Q8NAC3	1	1	1	1	1	1	TRUE
Pre-mRNA-splicing factor 38A	PRPF38A	sp|Q8NAV1|PR38A_HUMAN Pre-mRNA-splicing factor 38A OS=Homo sapiens OX=9606 GN=PRPF38A PE=1 SV=1	25.901	25.901	29.6014	1	1	1	2.2	2.2	2.2	37.476	0.092949	0.64186	814550000	1	2.2	312	312	1	Q8NAV1	Q8NAV1	1	1	1	1	1	1	TRUE
WASP homolog-associated protein with actin, membranes and microtubules	WHAMM	sp|Q8TF30|WHAMM_HUMAN WASP homolog-associated protein with actin, membranes and microtubules OS=Homo sapiens OX=9606 GN=WHAMM PE=1 SV=2	24.7023	24.7023	30.0242	1	1	1	2.1	2.1	2.1	90.923	0.057252	0.7636	1091900000	3	2.1	809	809	1	Q8TF30	Q8TF30	1	1	1	1	1	1	TRUE
Charged multivesicular body protein 7	CHMP7	sp|Q8WUX9|CHMP7_HUMAN Charged multivesicular body protein 7 OS=Homo sapiens OX=9606 GN=CHMP7 PE=1 SV=1	22.7866	22.7866	27.3102	1	1	1	3.8	3.8	3.8	50.91	0.050584	0.79332	166410000	4	3.8	453	453	1	Q8WUX9	Q8WUX9	1	1	1	1	1	1	TRUE
Prospero homeobox protein 1	PROX1	sp|Q92786|PROX1_HUMAN Prospero homeobox protein 1 OS=Homo sapiens OX=9606 GN=PROX1 PE=1 SV=2				1	1	1	0.9	0.9	0.9	83.202	0.042373	0.95207	0	1	0.9	737	737	1	Q92786	Q92786	1	1	1	1	1	1	TRUE
COP9 signalosome complex subunit 5	COPS5	sp|Q92905|CSN5_HUMAN COP9 signalosome complex subunit 5 OS=Homo sapiens OX=9606 GN=COPS5 PE=1 SV=4	21.4495	21.4495	25.5369	1	1	1	4.2	4.2	4.2	37.578	0.044355	0.87429	48684000	2	4.2	334	334	1	Q92905	Q92905	1	1	1	1	1	1	TRUE
39S ribosomal protein L24, mitochondrial	MRPL24	tr|X6RIR5|X6RIR5_HUMAN 39S ribosomal protein L24, mitochondrial (Fragment) OS=Homo sapiens OX=9606 GN=MRPL24 PE=1 SV=1;tr|X6RHI2|X6RHI2_HUMAN 39S ribosomal protein L24, mitochondrial (Fragment) OS=Homo sapiens OX=9606 GN=MRPL24 PE=1 SV=7;tr|X6RJ73|X6RJ73_H				1	1	1	10.3	10.3	10.3	7.7239	0.10059	0.62694	0	1	10.3		68	4	X6RIR5;X6RHI2;X6RJ73;Q96A35	X6RIR5;X6RHI2;X6RJ73;Q96A35	1	1	1	1;1;1;1	1;1;1;1	1;1;1;1	TRUE
SPRY domain-containing SOCS box protein 4	SPSB4	sp|Q96A44|SPSB4_HUMAN SPRY domain-containing SOCS box protein 4 OS=Homo sapiens OX=9606 GN=SPSB4 PE=1 SV=1	22.7176	22.7176	26.3025	1	1	1	6.2	6.2	6.2	30.178	0.044053	1.028	82765000	3	6.2	273	273	1	Q96A44	Q96A44	1	1	1	1	1	1	TRUE
POM121-like protein 2	POM121L2	sp|Q96KW2|P12L2_HUMAN POM121-like protein 2 OS=Homo sapiens OX=9606 GN=POM121L2 PE=3 SV=2	18.6588	18.6588	23.5657	1	1	1	1.9	1.9	1.9	109.91	0.082474	0.67589	12416000	0	1.9	1035	1035	1	Q96KW2	Q96KW2	1	1	1	1	1	1	TRUE
Cell division cycle 5-like protein	CDC5L	sp|Q99459|CDC5L_HUMAN Cell division cycle 5-like protein OS=Homo sapiens OX=9606 GN=CDC5L PE=1 SV=2	24.0397	24.0397	29.169	1	1	1	1.1	1.1	1.1	92.25	0.09571	0.65841	603590000	1	1.1	802	802	1	Q99459	Q99459	1	1	1	1	1	1	TRUE
FYVE and coiled-coil domain-containing protein 1	FYCO1	sp|Q9BQS8|FYCO1_HUMAN FYVE and coiled-coil domain-containing protein 1 OS=Homo sapiens OX=9606 GN=FYCO1 PE=1 SV=3	18.292	18.292	24.667	1	1	1	0.5	0.5	0.5	166.98	0.093645	0.66199	26639000	1	0.5	1478	1478	1	Q9BQS8	Q9BQS8	1	1	1	1	1	1	TRUE
Testis-expressed sequence 12 protein	TEX12	sp|Q9BXU0|TEX12_HUMAN Testis-expressed protein 12 OS=Homo sapiens OX=9606 GN=TEX12 PE=2 SV=1				1	1	1	13	13	13	14.107	0.041841	0.93859	0	2	13	123	123	1	Q9BXU0	Q9BXU0	1	1	1	1	1	1	TRUE
Ribosome production factor 1	RPF1	tr|X6R7Q1|X6R7Q1_HUMAN Ribosome production factor 1 OS=Homo sapiens OX=9606 GN=RPF1 PE=1 SV=1;sp|Q9H9Y2|RPF1_HUMAN Ribosome production factor 1 OS=Homo sapiens OX=9606 GN=RPF1 PE=1 SV=2	22.3257	22.3257	24.3257	1	1	1	9.3	9.3	9.3	14.241	0.10029	0.62674	21027000	0	9.3		129	2	X6R7Q1;Q9H9Y2	X6R7Q1;Q9H9Y2	1	1	1	1;1	1;1	1;1	TRUE
Pre-mRNA-splicing factor SYF1	XAB2	sp|Q9HCS7|SYF1_HUMAN Pre-mRNA-splicing factor SYF1 OS=Homo sapiens OX=9606 GN=XAB2 PE=1 SV=2	19.5113	19.5113	25.1551	1	1	1	0.8	0.8	0.8	100.01	0.044715	0.88774	37363000	1	0.8	855	855	1	Q9HCS7	Q9HCS7	1	1	1	1	1	1	TRUE
Resistin	RETN	sp|Q9HD89|RETN_HUMAN Resistin OS=Homo sapiens OX=9606 GN=RETN PE=1 SV=1	22.0673	22.0673	24.8747	2	2	2	24.1	24.1	24.1	11.419	0	29.096	30763000	3	24.1	108	108	1	Q9HD89	Q9HD89	2	2	2	2	2	2	True;True
PR domain zinc finger protein 5	PRDM5	sp|Q9NQX1|PRDM5_HUMAN PR domain zinc finger protein 5 OS=Homo sapiens OX=9606 GN=PRDM5 PE=1 SV=2	22.6228	22.6228	27.5297	1	1	1	1.9	1.9	1.9	73.09	0.047431	0.8321	193760000	1	1.9	630	630	1	Q9NQX1	Q9NQX1	1	1	1	1	1	1	TRUE
Transmembrane protein 260	TMEM260	sp|Q9NX78|TM260_HUMAN Transmembrane protein 260 OS=Homo sapiens OX=9606 GN=TMEM260 PE=1 SV=3	20.9068	20.9068	25.861	1	1	1	2.1	2.1	2.1	79.535	0.094463	0.6551	60944000	1	2.1	707	707	1	Q9NX78	Q9NX78	1	1	1	1	1	1	TRUE

## Sheet: Patient 4
Protein names	Gene names	Fasta headers	iBAQ P4_intercatome	iBAQ	Intensity P4_intercatome	Unique peptides P4_intercatome	Peptides	Razor + unique peptides	Unique peptides	Sequence coverage [%]	Unique + razor sequence coverage [%]	Unique sequence coverage [%]	Mol. weight [kDa]	Q-value	Score	Intensity	MS/MS count	Peptide counts (all)	Peptide counts (razor+unique)	Peptide counts (unique)	Sequence length	Sequence lengths	Number of proteins	Sequence coverage P4_intercatome [%]	Protein IDs	Majority protein IDs	Peptides P4_intercatome	Razor + unique peptides P4_intercatome	Peptide is razor
Apolipoprotein C-II;Proapolipoprotein C-II	APOC2;APOC4-APOC2	tr|A0A024R0T9|A0A024R0T9_HUMAN Apolipoprotein C-II isoform 1 OS=Homo sapiens OX=9606 GN=APOC4-APOC2 PE=1 SV=1;tr|K7ER74|K7ER74_HUMAN APOC4-APOC2 readthrough (NMD candidate) OS=Homo sapiens OX=9606 GN=APOC4-APOC2 PE=1 SV=1;sp|P02655|APOC2_HUMAN Apolipoprote	27.9668	27.9668	29.9668	5	5	5	5	48.5	48.5	48.5	11.284	0	143.78	1049300000	9				101		5	48.5	A0A024R0T9;K7ER74;P02655;Q6P163;V9GYJ8	A0A024R0T9;K7ER74;P02655	5	5	True;True;True;True;True
	SERPINA1	tr|A0A024R6I7|A0A024R6I7_HUMAN Alpha-1-antitrypsin OS=Homo sapiens OX=9606 GN=SERPINA1 PE=1 SV=1;tr|A0A0G2JRN3|A0A0G2JRN3_HUMAN Alpha-1-antitrypsin OS=Homo sapiens OX=9606 GN=SERPINA1 PE=1 SV=1	29.3608	29.3608	33.8844	3	33	33	3	67.7	67.7	6.2	46.708	0	323.31	15857000000	127				418		9	67.7	A0A024R6I7;A0A0G2JRN3;G3V2B9;G3V544;G3V5R8;G3V387;A0A0B4J278;A0A0G2JPK4;P20848	A0A024R6I7;A0A0G2JRN3	33	33	True;True;True;True;True;True;True;True;True;True;True;True;True;True;True;True;True;True;True;True;True;True;True;True;True;True;True;True;True;True;True;True;True
	IGLV4-69	sp|A0A075B6H9|LV469_HUMAN Immunoglobulin lambda variable 4-69 OS=Homo sapiens OX=9606 GN=IGLV4-69 PE=1 SV=1	29.8632	29.8632	32.1852	6	6	6	6	43.7	43.7	43.7	12.773	0	141.49	4883100000	35	6	6	6	119	119	1	43.7	A0A075B6H9	A0A075B6H9	6	6	True;True;True;True;True;True
	IGLV8-61	sp|A0A075B6I0|LV861_HUMAN Immunoglobulin lambda variable 8-61 OS=Homo sapiens OX=9606 GN=IGLV8-61 PE=3 SV=7	27.0709	27.0709	29.0709	3	3	3	3	13.1	13.1	13.1	12.814	0	20.284	563910000	7	3	3	3	122	122	1	13.1	A0A075B6I0	A0A075B6I0	3	3	True;True;True
	IGLV4-60	sp|A0A075B6I1|LV460_HUMAN Immunoglobulin lambda variable 4-60 OS=Homo sapiens OX=9606 GN=IGLV4-60 PE=3 SV=1	23.3756	23.3756	25.6975	1	1	1	1	8.3	8.3	8.3	12.987	0	8.4597	54415000	2	1	1	1	120	120	1	8.3	A0A075B6I1	A0A075B6I1	1	1	TRUE
	IGLV10-54	tr|A0A1W2PQ80|A0A1W2PQ80_HUMAN Immunoglobulin lambda variable 10-54 OS=Homo sapiens OX=9606 GN=IGLV10-54 PE=1 SV=1;sp|A0A075B6I4|LVX54_HUMAN Immunoglobulin lambda variable 10-54 OS=Homo sapiens OX=9606 GN=IGLV10-54 PE=3 SV=1	26.6313	26.6313	27.6312	1	1	1	1	9.4	9.4	9.4	12.733	0	7.4146	207890000	2				117		2	9.4	A0A1W2PQ80;A0A075B6I4	A0A1W2PQ80;A0A075B6I4	1	1	TRUE
	IGLV1-50	tr|A0A075B6I6|A0A075B6I6_HUMAN Immunoglobulin lambda variable 1-50 (non-functional) (Fragment) OS=Homo sapiens OX=9606 GN=IGLV1-50 PE=1 SV=1	23.5206	23.5206	25.5206	1	1	1	1	25.4	25.4	25.4	12.339	0	15.977	48136000	3	1	1	1	118	118	1	25.4	A0A075B6I6	A0A075B6I6	1	1	TRUE
	IGLV7-46	sp|A0A075B6I9|LV746_HUMAN Immunoglobulin lambda variable 7-46 OS=Homo sapiens OX=9606 GN=IGLV7-46 PE=3 SV=4	27.7477	27.7477	29.7477	2	4	4	2	21.4	21.4	13.7	12.468	0	25.023	901490000	7	4	4	2	117	117	1	21.4	A0A075B6I9	A0A075B6I9	4	4	True;True;True;True
	IGLV5-37	sp|A0A075B6J1|LV537_HUMAN Immunoglobulin lambda variable 5-37 OS=Homo sapiens OX=9606 GN=IGLV5-37 PE=3 SV=1	23.5882	23.5882	25.1731	1	1	1	1	16.3	16.3	16.3	13.277	0	7.1942	37832000	1	1	1	1	123	123	1	16.3	A0A075B6J1	A0A075B6J1	1	1	TRUE
	IGLV2-18	sp|A0A075B6J9|LV218_HUMAN Immunoglobulin lambda variable 2-18 OS=Homo sapiens OX=9606 GN=IGLV2-18 PE=3 SV=2	30.8193	30.8193	31.8192	3	3	3	3	28.8	28.8	28.8	12.412	0	49.476	3789100000	26	3	3	3	118	118	1	28.8	A0A075B6J9	A0A075B6J9	3	3	True;True;True
	IGLV3-16	sp|A0A075B6K0|LV316_HUMAN Immunoglobulin lambda variable 3-16 OS=Homo sapiens OX=9606 GN=IGLV3-16 PE=3 SV=2	25.1478	25.1478	26.7327	1	2	1	1	18.3	8.7	8.7	12.466	0.0131	6.5142	111520000	2	2	1	1	115	115	1	18.3	A0A075B6K0	A0A075B6K0	2	1	False;True
	IGLV3-10	sp|A0A075B6K4|LV310_HUMAN Immunoglobulin lambda variable 3-10 OS=Homo sapiens OX=9606 GN=IGLV3-10 PE=3 SV=2	29.5184	29.5184	31.5184	5	7	7	5	35.7	35.7	35.7	12.441	0	58.281	3076000000	30	7	7	5	115	115	1	35.7	A0A075B6K4	A0A075B6K4	7	7	True;True;True;True;True;True;True
	IGLV3-9	sp|A0A075B6K5|LV39_HUMAN Immunoglobulin lambda variable 3-9 OS=Homo sapiens OX=9606 GN=IGLV3-9 PE=3 SV=1	30.645	30.645	32.9669	2	4	4	2	49.6	49.6	26.1	12.332	0	184.46	8395200000	27				115		2	49.6	A0A075B6K5;A0A075B6K2	A0A075B6K5	4	4	True;True;True;True
Ig kappa chain V-II region FR	IGKV2D-28	sp|A0A075B6P5|KV228_HUMAN Immunoglobulin kappa variable 2-28 OS=Homo sapiens OX=9606 GN=IGKV2-28 PE=3 SV=1;sp|P01615|KVD28_HUMAN Immunoglobulin kappa variable 2D-28 OS=Homo sapiens OX=9606 GN=IGKV2D-28 PE=1 SV=2	26.4238	26.4238	28.0088	1	4	1	1	45.8	29.2	29.2	12.957	0	69.843	270070000	2				120		2	45.8	A0A075B6P5;P01615	A0A075B6P5;P01615	4	1	False;False;False;True
	IGHV4-4;IGHV4-31	sp|A0A075B6R2|HV404_HUMAN Immunoglobulin heavy variable 4-4 OS=Homo sapiens OX=9606 GN=IGHV4-4 PE=3 SV=2;tr|A0A087WW49|A0A087WW49_HUMAN Uncharacterized protein (Fragment) OS=Homo sapiens OX=9606 PE=4 SV=1;sp|A0A087WSY4|HV432_HUMAN Immunoglobulin heavy vari	23.4224	23.4224	25.4224	2	3	2	2	38.5	24.8	24.8	12.848	0	15.144	44967000	4				117		5	38.5	A0A075B6R2;A0A087WW49;A0A087WSY4;A0A075B7B6;P0DP07	A0A075B6R2;A0A087WW49;A0A087WSY4	3	2	True;False;True
	IGKV2-24;IGKV2D-24	sp|A0A0C4DH68|KV224_HUMAN Immunoglobulin kappa variable 2-24 OS=Homo sapiens OX=9606 GN=IGKV2-24 PE=3 SV=1;tr|A0A075B6R9|A0A075B6R9_HUMAN Immunoglobulin kappa variable 2D-24 (non-functional) (Fragment) OS=Homo sapiens OX=9606 GN=IGKV2D-24 PE=1 SV=1	29.4615	29.4615	31.4615	3	4	4	3	38.3	38.3	38.3	13.079	0	146.91	2957100000	20				120		2	38.3	A0A0C4DH68;A0A075B6R9	A0A0C4DH68;A0A075B6R9	4	4	True;True;True;True
	IGKV2D-29;IGKV A18;IGKV2D-26	sp|A0A075B6S2|KVD29_HUMAN Immunoglobulin kappa variable 2D-29 OS=Homo sapiens OX=9606 GN=IGKV2D-29 PE=3 SV=1;sp|A2NJV5|KV229_HUMAN Immunoglobulin kappa variable 2-29 OS=Homo sapiens OX=9606 GN=IGKV2-29 PE=3 SV=2;sp|A0A0A0MRZ7|KVD26_HUMAN Immunoglobulin kap	26.7851	26.7851	29.107	2	4	2	2	25.8	25.8	25.8	13.143	0	21.1	578200000	4				120		3	25.8	A0A075B6S2;A2NJV5;A0A0A0MRZ7	A0A075B6S2;A2NJV5;A0A0A0MRZ7	4	2	False;False;True;True
	IGKV1-27	sp|A0A075B6S5|KV127_HUMAN Immunoglobulin kappa variable 1-27 OS=Homo sapiens OX=9606 GN=IGKV1-27 PE=3 SV=1	26.1826	26.1826	28.5045	2	3	2	2	53.8	40.2	40.2	12.711	0	21.474	380820000	4	3	2	2	117	117	1	53.8	A0A075B6S5	A0A075B6S5	3	2	True;True;False
	IGKV1D-37	tr|A0A075B6S9|A0A075B6S9_HUMAN Immunoglobulin kappa variable 1-37 (non-functional) (Fragment) OS=Homo sapiens OX=9606 GN=IGKV1-37 PE=1 SV=7	24.4969	24.4969	26.8187	1	1	1	1	13.7	13.7	13.7	12.688	0	7.6564	118370000	1	1	1	1	117	117	1	13.7	A0A075B6S9	A0A075B6S9	1	1	TRUE
Tetratricopeptide repeat protein 17	TTC17	tr|A0A075B7B2|A0A075B7B2_HUMAN Tetratricopeptide repeat protein 17 (Fragment) OS=Homo sapiens OX=9606 GN=TTC17 PE=1 SV=1;sp|Q96AE7|TTC17_HUMAN Tetratricopeptide repeat protein 17 OS=Homo sapiens OX=9606 GN=TTC17 PE=1 SV=1	21.7605	21.7605	24.7606	1	1	1	1	11.4	11.4	11.4	16.985	0.0875	5.3331	28423000	1				140		2	11.4	A0A075B7B2;Q96AE7	A0A075B7B2;Q96AE7	1	1	TRUE
	IGHV3OR16-12	tr|A0A075B7B8|A0A075B7B8_HUMAN Immunoglobulin heavy variable 3/OR16-12 (non-functional) (Fragment) OS=Homo sapiens OX=9606 GN=IGHV3OR16-12 PE=1 SV=1	28.3476	28.3476	31.1549	2	3	2	2	26.5	17.1	17.1	12.874	0	29.764	2390900000	9	3	2	2	117	117	1	26.5	A0A075B7B8	A0A075B7B8	3	2	True;False;True
	IGHV1OR15-1	tr|A0A075B7D0|A0A075B7D0_HUMAN Immunoglobulin heavy variable 1/OR15-1 (non-functional) (Fragment) OS=Homo sapiens OX=9606 GN=IGHV1OR15-1 PE=1 SV=1	24.5682	24.5682	27.3756	2	2	2	2	19.7	19.7	19.7	13.012	0	38.227	174130000	5	2	2	2	117	117	1	19.7	A0A075B7D0	A0A075B7D0	2	2	True;True
	IGHV3OR15-7	tr|A0A075B7D8|A0A075B7D8_HUMAN Immunoglobulin heavy variable 3/OR15-7 (pseudogene) (Fragment) OS=Homo sapiens OX=9606 GN=IGHV3OR15-7 PE=1 SV=1	25.6345	25.6345	28.4418	1	3	1	1	21.8	9.2	9.2	13.08	0.013158	6.5238	364620000	4	3	1	1	119	119	1	21.8	A0A075B7D8	A0A075B7D8	3	1	False;False;True
	IGLV5-45	sp|A0A087WSX0|LV545_HUMAN Immunoglobulin lambda variable 5-45 OS=Homo sapiens OX=9606 GN=IGLV5-45 PE=3 SV=1;tr|A0A0G2JSC0|A0A0G2JSC0_HUMAN Immunoglobulin lambda variable 5-45 (Fragment) OS=Homo sapiens OX=9606 GN=IGLV5-45 PE=1 SV=1;sp|A0A0G2JS06|LV539_HUMA	26.3121	26.3121	27.3121	2	2	2	2	26.8	26.8	26.8	13.162	0	14.402	166630000	5				123		3	26.8	A0A087WSX0;A0A0G2JSC0;A0A0G2JS06	A0A087WSX0;A0A0G2JSC0;A0A0G2JS06	2	2	True;True
	IGKV3D-15	sp|A0A087WSY6|KVD15_HUMAN Immunoglobulin kappa variable 3D-15 OS=Homo sapiens OX=9606 GN=IGKV3D-15 PE=3 SV=6	29.8748	29.8748	31.4597	1	3	2	1	32.2	26.1	7.8	12.534	0	209.94	2953400000	12	3	2	1	115	115	1	32.2	A0A087WSY6	A0A087WSY6	3	2	True;False;True
Keratin-associated protein 10-9	KRTAP10-9	tr|A0A087WT19|A0A087WT19_HUMAN Keratin-associated protein 10-9 OS=Homo sapiens OX=9606 GN=KRTAP10-9 PE=4 SV=1;sp|P60411|KR109_HUMAN Keratin-associated protein 10-9 OS=Homo sapiens OX=9606 GN=KRTAP10-9 PE=1 SV=2	31.9964	31.9964	31.9964	1	1	1	1	4.2	4.2	4.2	19.72	0.088889	5.3542	4284300000	2				192		2	4.2	A0A087WT19;P60411	A0A087WT19;P60411	1	1	TRUE
Ankyrin-3	ANK3	tr|H0Y951|H0Y951_HUMAN Ankyrin-3 (Fragment) OS=Homo sapiens OX=9606 GN=ANK3 PE=1 SV=1;tr|A0A087WX55|A0A087WX55_HUMAN Ankyrin-3 (Fragment) OS=Homo sapiens OX=9606 GN=ANK3 PE=1 SV=1;tr|A0A087WY90|A0A087WY90_HUMAN Ankyrin-3 (Fragment) OS=Homo sapiens OX=9606	21.7063	21.7063	25.0282	1	1	1	1	11.4	11.4	11.4	18.148	0.036496	5.6302	34217000	1				166		7	11.4	H0Y951;A0A087WX55;A0A087WY90;H0Y3A4;A0A087WZ65;A0A087WTF3;Q12955	H0Y951;A0A087WX55;A0A087WY90;H0Y3A4;A0A087WZ65;A0A087WTF3;Q12955	1	1	TRUE
Dynein heavy chain 11, axonemal	DNAH11	tr|U3KQN2|U3KQN2_HUMAN Dynein heavy chain 11, axonemal (Fragment) OS=Homo sapiens OX=9606 GN=DNAH11 PE=4 SV=1;tr|A0A0C4DFR0|A0A0C4DFR0_HUMAN Dynein heavy chain 11, axonemal OS=Homo sapiens OX=9606 GN=DNAH11 PE=1 SV=1;tr|A0A087WYC6|A0A087WYC6_HUMAN Dynein h				1	1	1	1	6.9	6.9	6.9	19.891	0.045936	5.5773	0	2				174		4	6.9	U3KQN2;A0A0C4DFR0;A0A087WYC6;Q96DT5	U3KQN2;A0A0C4DFR0;A0A087WYC6;Q96DT5	1	1	TRUE
WASH complex subunit FAM21C;WASH complex subunit FAM21A	FAM21A;FAM21C	tr|B1AP61|B1AP61_HUMAN WASH complex subunit 2A (Fragment) OS=Homo sapiens OX=9606 GN=WASHC2A PE=1 SV=1;tr|A0A087WYF6|A0A087WYF6_HUMAN WASH complex subunit 2A OS=Homo sapiens OX=9606 GN=WASHC2A PE=1 SV=1;tr|F8W7U3|F8W7U3_HUMAN WASH complex subunit 2A OS=Hom	26.4066	26.4066	29.7285	1	1	1	1	7.7	7.7	7.7	17.637	0	6.6284	889540000	2				156		9	7.7	B1AP61;A0A087WYF6;F8W7U3;J3KP36;E7ESD2;A0A0A0MR88;A0A096LPC5;Q9Y4E1;Q641Q2	B1AP61;A0A087WYF6;F8W7U3;J3KP36;E7ESD2;A0A0A0MR88;A0A096LPC5;Q9Y4E1;Q641Q2	1	1	TRUE
Collagen alpha-2(V) chain	COL5A2	tr|A0A087WYX9|A0A087WYX9_HUMAN Collagen alpha-2(V) chain OS=Homo sapiens OX=9606 GN=COL5A2 PE=1 SV=1;sp|P05997|CO5A2_HUMAN Collagen alpha-2(V) chain OS=Homo sapiens OX=9606 GN=COL5A2 PE=1 SV=3				1	1	1	1	4.3	4.3	4.3	106.98	0.18473	5.2358	0	1				1112		2	4.3	A0A087WYX9;P05997	A0A087WYX9;P05997	1	1	TRUE
Beta-1,3-galactosyl-O-glycosyl-glycoprotein beta-1,6-N-acetylglucosaminyltransferase 7	GCNT7	tr|A0A087WZE6|A0A087WZE6_HUMAN Beta-1,3-galactosyl-O-glycosyl-glycoprotein beta-1,6-N-acetylglucosaminyltransferase 7 OS=Homo sapiens OX=9606 GN=GCNT7 PE=4 SV=1;sp|Q6ZNI0|GCNT7_HUMAN Beta-1,3-galactosyl-O-glycosyl-glycoprotein beta-1,6-N-acetylglucosaminyl	20.3503	20.3503	24.8739	1	1	1	1	6.1	6.1	6.1	49.19	0.1224	5.241	30746000	0				429		2	6.1	A0A087WZE6;Q6ZNI0	A0A087WZE6;Q6ZNI0	1	1	TRUE
Ig kappa chain V-II region Cum	IGKV2-40	tr|A0A087X0Q4|A0A087X0Q4_HUMAN Immunoglobulin kappa variable 2-40 OS=Homo sapiens OX=9606 GN=IGKV2-40 PE=1 SV=1;sp|A0A087WW87|KV240_HUMAN Immunoglobulin kappa variable 2-40 OS=Homo sapiens OX=9606 GN=IGKV2-40 PE=3 SV=2;sp|P01614|KVD40_HUMAN Immunoglobulin	31.4351	31.4351	33.435	3	6	6	3	59.6	59.6	40.4	11.434	0	118.99	11613000000	25				104		3	59.6	A0A087X0Q4;A0A087WW87;P01614	A0A087X0Q4;A0A087WW87;P01614	6	6	True;True;True;True;True;True
Serum amyloid A-4 protein	SAA2-SAA4;SAA4	tr|A0A096LPE2|A0A096LPE2_HUMAN SAA2-SAA4 readthrough OS=Homo sapiens OX=9606 GN=SAA2-SAA4 PE=4 SV=1;sp|P35542|SAA4_HUMAN Serum amyloid A-4 protein OS=Homo sapiens OX=9606 GN=SAA4 PE=1 SV=2	26.666	26.666	30.251	6	9	6	6	44.2	30.8	30.8	23.353	0	46.268	1277800000	15				208		5	44.2	A0A096LPE2;P35542;A0A3B3ISW8;E9PR14;G3V1D9	A0A096LPE2;P35542	9	6	True;True;False;False;True;True;False;True;True
Golgi resident protein GCP60;Unconventional myosin-X	MYO10;ACBD3	tr|E9PEW5|E9PEW5_HUMAN Unconventional myosin-X OS=Homo sapiens OX=9606 GN=MYO10 PE=1 SV=1;tr|A0A0A0MQX1|A0A0A0MQX1_HUMAN Unconventional myosin-X OS=Homo sapiens OX=9606 GN=MYO10 PE=1 SV=1;sp|Q9H3P7|GCP60_HUMAN Golgi resident protein GCP60 OS=Homo sapiens O	18.839	18.839	24.7459	1	1	1	1	0.6	0.6	0.6	161.49	0.10452	5.2631	28135000	3				1397		4	0.6	E9PEW5;A0A0A0MQX1;Q9H3P7;Q9HD67	E9PEW5;A0A0A0MQX1;Q9H3P7;Q9HD67	1	1	TRUE
Neurotrophin receptor-interacting factor homolog	ZNF274	tr|A0A0A0MR47|A0A0A0MR47_HUMAN Neurotrophin receptor-interacting factor homolog OS=Homo sapiens OX=9606 GN=ZNF274 PE=1 SV=1;sp|Q96GC6|ZN274_HUMAN Neurotrophin receptor-interacting factor homolog OS=Homo sapiens OX=9606 GN=ZNF274 PE=1 SV=2	20.5127	20.5127	25.0976	1	1	1	1	1.1	1.1	1.1	69.35	0.08805	5.3443	35904000	1				611		2	1.1	A0A0A0MR47;Q96GC6	A0A0A0MR47;Q96GC6	1	1	TRUE
MAP kinase-activating death domain protein	MADD	tr|A0A0A0MRB5|A0A0A0MRB5_HUMAN MAP kinase-activating death domain protein OS=Homo sapiens OX=9606 GN=MADD PE=1 SV=1;sp|Q8WXG6|MADD_HUMAN MAP kinase-activating death domain protein OS=Homo sapiens OX=9606 GN=MADD PE=1 SV=2	18.1954	18.1954	24.3452	1	1	1	1	0.5	0.5	0.5	176.55	0.026616	5.8225	21312000	2				1588		2	0.5	A0A0A0MRB5;Q8WXG6	A0A0A0MRB5;Q8WXG6	1	1	TRUE
Troponin T, cardiac muscle	TNNT2;HNTN1	tr|E7EPN8|E7EPN8_HUMAN Troponin T, cardiac muscle (Fragment) OS=Homo sapiens OX=9606 GN=TNNT2 PE=1 SV=1;tr|Q7Z554|Q7Z554_HUMAN Troponin T cardiac isoform OS=Homo sapiens OX=9606 GN=TNNT2 PE=1 SV=1;tr|E7EPW4|E7EPW4_HUMAN Troponin T, cardiac muscle OS=Homo s	20.4524	20.4524	23.4524	1	1	1	1	4.4	4.4	4.4	21.755	0.1186	5.2496	11478000	1				180		6	4.4	E7EPN8;Q7Z554;E7EPW4;A0A0A0MRJ5;A0A0A0MRJ4;P45379	E7EPN8;Q7Z554;E7EPW4;A0A0A0MRJ5;A0A0A0MRJ4;P45379	1	1	TRUE
Ig kappa chain V-III region VG	IGKV3D-11	sp|A0A0A0MRZ8|KVD11_HUMAN Immunoglobulin kappa variable 3D-11 OS=Homo sapiens OX=9606 GN=IGKV3D-11 PE=3 SV=6;sp|P04433|KV311_HUMAN Immunoglobulin kappa variable 3-11 OS=Homo sapiens OX=9606 GN=IGKV3-11 PE=1 SV=1	32.1583	32.1583	34.1583	2	3	3	2	32.2	32.2	26.1	12.625	0	323.31	19172000000	28				115		2	32.2	A0A0A0MRZ8;P04433	A0A0A0MRZ8;P04433	3	3	True;True;True
[truncated: 343 more rows]

## Sheet: Patient 5
Protein names	Gene names	Fasta headers	iBAQ P5_interactome	iBAQ	Intensity P5_interactome	Unique peptides P5_interactome	Peptides	Razor + unique peptides	Unique peptides	Sequence coverage [%]	Unique + razor sequence coverage [%]	Unique sequence coverage [%]	Mol. weight [kDa]	Q-value	Score	Intensity	MS/MS count	Peptide counts (all)	Peptide counts (razor+unique)	Peptide counts (unique)	Number of proteins	Sequence length	Sequence lengths	Sequence coverage P5_interactome [%]	Protein IDs	Majority protein IDs	Peptides P5_interactome	Razor + unique peptides P5_interactome	Peptide is razor
[truncated: 387 more rows]

[truncated: 9 more sheets: Patient 6, Patient 7, Patient 8, Patient 9, Patient 10, Patient 11, Patient 12, Patient 13, Patient 14]
