# Supplementary material
Source: HighWire-hosted journal article supplement (https://jitc.bmj.com/content/10/5/e003733)
Supplement: inline-supplementary-material-9 [file inline-supplementary-material-9.xlsx]

## Sheet: Sheet1
Supplementary Table S9. Summary of all peptides that belong to the same protein group.
Gene name	Peptide (Unique to group)	Protein name	Uniprot accession	Total no. of identified peptides	No. of benign patients	No. of cancer patients	Type of identified patient/sample	Pathways in cancer (KEGG)	P1	P5	P7	P8	P9	P2	P3	P4	P6	P10	P11	P12	P13	P14
C2orf72	AAAAAARAI	Uncharacterized protein C2orf72	A6NCS6	1	1	0	Benign		1
ZBTB22	AAADIVNFL	Zinc finger and BTB domain-containing protein 22;Zinc finger and BTB domain-containing protein 22 (Fragment)	A2AB93;O15209	1	1	1	Both		1										1
NAXD	AAAPVIKAY	ATP-dependent (S)-NAD(P)H-hydrate dehydratase	Q8IW45	1	1	3	Both		1					1			1		1
ELN	AAGLGGVLGGA	Elastin;Elastin (Supravalvular aortic stenosis, Williams-Beuren syndrome), isoform CRA_h	G5E950;G3V0G6;E7EN65;F8WAH6;P15502	1	1	0	Benign		1
FAM222A	AARELAGPPA	Protein FAM222A	Q5U5X8	1	1	2	Both		1								1		1
RUNDC1	AEARPGATA	RUN domain-containing protein 1;RUN domain-containing protein 1 (Fragment)	K7EQS2;Q96C34	1	1	2	Both		1					1					1
YWHAB;YWHAG;YWHAZ	AERYDDMAA;IVDQSQQAY;KAYSEAHEI;MDKNELVQKA;RYDDMAACM;SDTQGDEAEAGEGGEN	14-3-3 protein beta/alpha;14-3-3 protein beta/alpha (Fragment);14-3-3 protein gamma;14-3-3 protein zeta/delta;14-3-3 protein zeta/delta (Fragment)	A0A0J9YWE8;B0AZS6;B7Z2E6;E5RGE1;E5RIR4;E7ESK7;E7EVZ2;E7EX29;E9PD24;H0YB80;P31946;P61981;P63104;Q4VY19;Q4VY20	6	2	5	Both		1			1		2					1	1	3	2
MAP1A	AEYDSVVAA	Microtubule-associated protein 1A	E9PGC8;P78559	1	1	0	Benign		1
FUBP1;KHSRP	AEYYRQQAA;GTPESVQSAK;HSVGVVIGR;NPPPNADPNM;QESGCKIQI	Far upstream element-binding protein 1;Far upstream element-binding protein 1 (Fragment);Far upstream element-binding protein 2;Far upstream element-binding protein 2 (Fragment)	A0A087WTP3;C9JSZ1;E9PEB5;M0R0C6;M0R0I5;M0R251;M0R263;M0R3J3;Q92945;Q96AE4	5	2	5	Both		2				1	1	1				1		1	1
ZNF703	AHDPAGPSL	Zinc finger protein 703	Q9H7S9	1	2	3	Both		1	1				1					1		1
DCAF5	AHEDAVYGL	DDB1- and CUL4-associated factor 5;DDB1- and CUL4-associated factor 5 (Fragment)	G3V3S1;Q8TBB7;Q96JK2	1	1	2	Both		1					1					1
FADS1	AQGPTPRYF	Acyl-CoA (8-3)-desaturase;Acyl-CoA (8-3)-desaturase (Fragment)	H0YB97;H7C2V0;A0A0A0MR51;O60427	1	1	4	Both		1					1			1	1	1
3;ARF1;ARF3;ARF4;ARF5;ARF6	AEDELRDAVLL;AGKTTILYKLKLGQSV;DAAGKTTILYK;EIVTTIPTI;GEIVTTIPTI;SEMTDKLGLQSL	ADP-ribosylation factor 1;ADP-ribosylation factor 3;ADP-ribosylation factor 3 (Fragment);ADP-ribosylation factor 4;ADP-ribosylation factor 4 (Fragment);ADP-ribosylation factor 5;ADP-ribosylation factor 5 (Fragment);ADP-ribosylation factor 6;Uncharacterized protein	C9J1Z8;C9JAK5;C9JPM4;F5H0C7;F5H1V1;F5H423;F5H6T5;F8WDB3;P18085;P61204;P62330;P84077;P84085;U3KQF2	6	2	4	Both		1				1	1		2		1	1
RIMS1	DAAPPSAPP	Regulating synaptic membrane exocytosis protein 1	Q86UR5	1	1	3	Both		1					1			1		1
STYX	DAFAYVQER	Serine/threonine/tyrosine-interacting protein	Q8WUJ0	1	1	0	Benign		1
TMPRSS11B	DFHISGVTY	Transmembrane protease serine 11B	Q86T26	1	1	2	Both		1					1					1
TRMO	DIKPYIAEY	tRNA (adenine(37)-N6)-methyltransferase;Chromosome 9 open reading frame 156, isoform CRA_b;LP4790 protein	Q6Y2L2;Q5T114;Q9BU70	1	1	2	Both		1					1					1
TIMP2	DIYGNPIKR	Metalloproteinase inhibitor 2	P16035	1	1	0	Benign		1
CST6	DLSPDDPQVQ	Cystatin-M	Q15828	1	1	0	Benign		1
ARL2;ARL2-SNX15	ATLLIFANK;DTISPTLGF	ADP-ribosylation factor-like protein 2;ARL2-SNX15 readthrough (NMD candidate)	P36404;V9GYD0	2	1	6	Both		1					1		1		1	1		1	1
HADH	DTPGFIVNR	Hydroxyacyl-coenzyme A dehydrogenase, mitochondrial;Hydroxyacyl-coenzyme A dehydrogenase, mitochondrial (Fragment)	A0A1W2PQ78;A0A1W2PQV5;A0A1W2PNM1;A0A0A0MSE2;A0A0D9SFP2;E9PF18;Q16836	1	1	0	Benign		1
GARNL3	DTTGIHSVY	GTPase-activating Rap/Ran-GAP domain-like protein 3	A0A0C4DFW0;Q5VVW2	1	1	2	Both		1					1					1
RPLP2	DVIAQGIGKL	60S acidic ribosomal protein P2;60S acidic ribosomal protein P2 (Fragment)	H0YDD8;P05387	1	1	3	Both		1					1				1	1
4;TOMM5	DVISSIRNF;LEVTGLETV;LPSPIVQDVL;LTAAPPSSK;RLTAAPPSSK;RVTPFILKK;SSPTVPSE;VALLRVTPF	Mitochondrial import receptor subunit TOM5 homolog;Mitochondrial import receptor subunit TOM5 homolog (Fragment);Putative ubiquitin-like protein FUBI-like protein ENSP00000310146;Uncharacterized protein;Uncharacterized protein (Fragment)	A0A0A0MRY4;A0A494C071;A6NDN8;F8W8Z9;H0YFG9;H3BUX3;K7EQZ3;Q8N4H5	8	1	8	Both		1					1	3	1		1	3	1	2	2
CTH	DVYGGTNRY	Cystathionine gamma-lyase	P32929	1	1	2	Both		1					1					1
UBE2M	EAAEVLQNNR	NEDD8-conjugating enzyme Ubc12;NEDD8-conjugating enzyme Ubc12 (Fragment)	M0QX69;P61081	1	1	0	Benign		1
DUSP1;DUSP4	EAFEFVKQR;EHIVPNAEL;ERSPRAESL;RAAQVFFLK;SAEAGSPAM	Dual specificity protein phosphatase 1;Dual specificity protein phosphatase 4	P28562;Q13115	5	1	5	Both		1					1	2				1		1	1
TRIM24	EAVGVTSQR	Transcription intermediary factor 1-alpha	O15164	1	1	0	Benign		1
HNRNPM;MYEF2	AAGVEAAAEVAATEIK;AAGVEAAAEVAATEIKM;AEVAATEI;AEVAATEIKM;AEVLNKHSL;ASFDRAIEM;ATGLERMGAN;EAVQAISMF;EVAATEIKM;EVFSMAGVVVR;IFVRNLPFDF;IPNEIIHAL;KSRGIGTVTF;LLFDRPMHV;TNIPFDVKW;VEFKMEESM	Heterogeneous nuclear ribonucleoprotein M;Heterogeneous nuclear ribonucleoprotein M (Fragment);Myelin expression factor 2;Myelin expression factor 2 (Fragment)	A0A087WUT0;A0A087X0X3;A0A0A0MQW0;A0A0A0MR39;H0YN19;M0QY96;M0QYL3;M0QYQ7;M0QZM1;M0R019;M0R0N3;M0R0Y6;M0R2I7;M0R2T0;P52272;Q9P2K5	16	3	8	Both		4	3			4	3	3	4	1	1	6		5	2
SPSB2	EGLEELLSA	SPRY domain-containing SOCS box protein 2;SPRY domain-containing SOCS box protein 2 (Fragment)	E5RIC2;Q99619	1	1	0	Benign		1
PPP2R5A;PPP2R5B;PPP2R5E	ALFHAQLAY;DPSLTEPVI;EHFNGVAEL;IEEPLFKQI;NPAIVALVY;NPTIVALVY;RYVDQKFVL;SLFHAQLAY;VPSSEQPEL;YQSNQQELT	Serine/threonine-protein phosphatase 2A 56 kDa regulatory subunit alpha isoform;Serine/threonine-protein phosphatase 2A 56 kDa regulatory subunit beta isoform;Serine/threonine-protein phosphatase 2A 56 kDa regulatory subunit beta isoform (Fragment);Serine/threonine-protein phosphatase 2A 56 kDa regulatory subunit epsilon isoform	E9PNY3;E9PQN5;Q15172;Q15173;Q16537	10	3	5	Both		1	1			1	1	2				2		3	3
TINF2	EHFPRVLEF	TERF1-interacting nuclear factor 2;TERF1-interacting nuclear factor 2 (Fragment);TERF1 (TRF1)-interacting nuclear factor 2, isoform CRA_b	H0YMN3;H0YL20;H0YKG7;H0YLC9;B4DFJ1;Q9BSI4	1	1	2	Both		1					1					1
PER1	EHITSEYTL	Period circadian protein homolog 1	J3QSH9;J3KTM2;J3KRL7;O15534	1	1	2	Both		1					1					1
TRAPPC12	EHMMESVLI	Trafficking protein particle complex subunit 12	Q8WVT3	1	1	2	Both		1					1					1
STK3;STK4	EHDDTLPSQL;EIIKEISIM;IPQDGDYEFL;KETGQIVAI;QEIEEIRQKY;SAKGVSILR;SYGSVFKAI;TVQLRNPPR	Serine/threonine-protein kinase 3;Serine/threonine-protein kinase 3 (Fragment);Serine/threonine-protein kinase 4	A0A087WYT4;A0A087WZ06;E5RFQ9;E5RIM6;F5H5B4;Q13043;Q13188;Q8NBU1	8	2	5	Both	+	1				2	2				1	3		2	1
AP3M1;AP3M2	ELIKPPTILR;GSYTFDPVTK;VYVKHNISF;VYVKHSISF	AP-3 complex subunit mu-1;AP-3 complex subunit mu-2;AP-3 complex subunit mu-2 (Fragment)	E5RJ52;E7ER80;H0YBA0;P53677;Q9Y2T2	4	1	3	Both		1							1			2		2
GALNT18	ELKEKLTEY	Polypeptide N-acetylgalactosaminyltransferase 18	Q6P9A2	1	1	2	Both		1					1					1
ANHX	ELVTLAGRLCRDFQD	Anomalous homeobox protein	E9PGG2	1	1	0	Benign		1
FMR1;FXR1;FXR2	AAFHEEFVV;DEDTGTFRIY;DPDSNPYSL;EDSITVAFE;EHGPSEKAI;ERLQIDEQL;NEIVTLERL;NSSSISSVL;RIYGESADAVK;VHEDSVTIF;VLLDYHLNYL	FMR1 protein;Fragile X mental retardation 1;Fragile X mental retardation 1, isoform CRA_e;Fragile X mental retardation syndrome-related protein 1;Fragile X mental retardation syndrome-related protein 1 (Fragment);Fragile X mental retardation syndrome-related protein 2;Fragile X mental retardation syndrome-related protein 2 (Fragment);Synaptic functional regulator FMR1;Synaptic functional regulato…	A0A087WWU4;A0A087WXI3;A0A087WY29;A8MQB8;B4DXZ6;E7EU85;E9PFF5;G3V0J0;H7C4S4;I3L1Z2;P51114;P51116;Q06787;Q8IXW7;R9WNI0	11	3	5	Both		1	1			1	4	2	1			5		1
PROSER2	ERMAGNEAL	Proline and serine-rich protein 2;Chromosome 10 open reading frame 47, isoform CRA_b	D3DRR9;Q86WR7	1	1	1	Both		1					1
RPS19BP1	ESVSQQILR	Active regulator of SIRT1	Q86WX3	1	1	0	Benign		1
F2	ETGDGLDEDSDRAIEGRTA	Prothrombin;Prothrombin (Fragment)	C9JV37;E9PIT3;P00734	1	1	0	Benign		1
MSRB1	ETIHADSVAKR	Methionine-R-sulfoxide reductase B1	A0A087WXE3;H3BS64;A8MYR2;Q9NZV6	1	1	0	Benign		1
4;CYP2B6;CYP2C18;CYP2C19;CYP2C8;CYP2C9;CYP2E1	DYKDEFSGR;ETTSTTLRY;EVKEYVSER;FHYQDQEFL;IYGPVFTL;KVIKNVAEV;KYPEIEEKL;PYMDAVVHEIQRF;QEFPDPEKF;RFLNLMEKF;RYIDLLPTSL;SILQNFNLK;VVFQKRFDY;VYGPVFTL;VYGPVFTLY;VYGPVFTV;YTDAVVHEIQRY	Cytochrome P450 2B6;Cytochrome P450 2B6 (Fragment);Cytochrome P450 2C18;Cytochrome P450 2C19;Cytochrome P450 2C8;Cytochrome P450 2C9;Cytochrome P450 2E1;Cytochrome P450 2E1 (Fragment);Uncharacterized protein (Fragment)	A0A087X0B3;A0A087X125;A0A0D9SG51;A0A2R8YF67;A0A2R8YFA4;B7Z1F5;G3V188;H0Y593;H0Y7H4;P05181;P10632;P11712;P20813;P33260;P33261	17	2	7	Both		1				2	2	2		2	2	9		7	4
PPARD	ETVRELTEF	Peroxisome proliferator-activated receptor delta	Q03181	1	1	3	Both	+	1					1				1	1
CYP2A13;CYP2A6;CYP2A7	ETVSTTLRY;FSIATLRDF;RYGPVFTI;TVMQNFRLK	Cytochrome P450 2A13;Cytochrome P450 2A6;Cytochrome P450 2A7	F8W816;P11509;P20853;Q16696	4	2	4	Both		1				1	1					3		1	2
CD63	EVAAAIAGY	CD63 antigen;Tetraspanin (Fragment);CD63 antigen (Fragment)	F8VNT9;F8VV56;F8W022;F8VWK8;P08962	1	1	3	Both		1					1				1	1
PPM1H	EVAEAITQF	Protein phosphatase 1H	Q9ULR3	1	1	3	Both		1					1				1	1
PHGDH	EVATRMQSF	D-3-phosphoglycerate dehydrogenase;D-3-phosphoglycerate dehydrogenase (Fragment)	A0A286YFE1;A0A286YFM8;A0A286YF78;A0A286YFL2;A0A286YFA2;A0A286YF22;A0A2C9F2M7;O43175	1	1	3	Both		1					1				1	1
ADAT2	EVFEHTVLY	tRNA-specific adenosine deaminase 2	Q7Z6V5	1	1	2	Both		1					1					1
ROR1	EVIEMVRKR	Inactive tyrosine-protein kinase transmembrane receptor ROR1	A0A0A0MTJ5;Q01973	1	1	0	Benign		1
ZW10	EVIGKITAL	Centromere/kinetochore protein zw10 homolog	O43264	1	1	3	Both		1					1				1	1
CAMLG	EVINRSMDTY	Calcium signal-modulating cyclophilin ligand	P49069	1	1	3	Both		1					1				1	1
MAF;MAFA;MAFB	AGPHYHHHHH;ALISNSHQL;DVKKEPLGR;EVIRLKQKR;EYVNDFDLLKF;FSDEQLVTM;HHAAGGLHF;HHAYPGAGV;HHLENEKTQL;HPHPHHAY;HPVPQPLQSF;KAHLEDYYW;KTHLEDLYW;LENEKTQLI;MEYVNDFDLL;PTSPLAMEY;SPSSPEFFL;YQQMNPEAL	Transcription factor Maf;Transcription factor MafA;Transcription factor MafB	H3BP11;O75444;Q8NHW3;Q9Y5Q3	18	5	6	Both		1	3	1	1	2	3	3	3			5		4	3
MMUT	EVIVGVNKY	Methylmalonyl-CoA mutase, mitochondrial	P22033	1	1	3	Both		1					1				1	1
RNF34	EVMGTGAVR	E3 ubiquitin-protein ligase RNF34;E3 ubiquitin-protein ligase RNF34 (Fragment)	G3V4D1;G3V5F1;G3V504;H7BYJ1;Q969K3	1	1	0	Benign		1
1;IGHV3-13;IGHV3-16;IGHV3-23;IGHV3-35;IGHV3-48;IGHV3-49;IGHV3-64D;IGHV3-7;IGHV3-72;IGHV3-73;IGHV3-74;IGHV3-9;IGHV3OR15-7;IGHV3OR16-13;IGHV3OR16-8;IGHV3OR16-9	EVQLVESGGGLVQPG;EVQLVESGGGLVQPGG;EVQLVESGGGLVQPGGS;EVQLVESGGGLVQPGGSL;EVQLVESGGGLVQPGGSLR;EVQLVESGGGLVQPGGSLRL;EVQLVESGGGLVQPGGSLRLS;EVQLVESGGGLVQPGR;KAYGGTTEY;KGLEWVSAISGSGG;LVESGGGLVQPGGSLR;PITGSEIVAI;SGYKINVQK	Immunoglobulin heavy variable 3/OR15-7 (pseudogene) (Fragment);Immunoglobulin heavy variable 3/OR16-13 (non-functional) (Fragment);Immunoglobulin heavy variable 3/OR16-8 (non-functional) (Fragment);Immunoglobulin heavy variable 3/OR16-9 (non-functional);Immunoglobulin heavy variable 3/OR16-9 (non-functional) (Fragment);Immunoglobulin heavy variable 3-13;Immunoglobulin heavy variable 3-16 (non-fun…	A0A075B7D8;A0A075B7E8;A0A075B7F1;A0A0A0MS15;A0A0B4J1V6;A0A0B4J1X5;A0A0B4J1Y9;A0A0B4J2B5;A0A0C4DH30;A0A0C4DH35;A0A0J9YX35;O00370;P01763;P01764;P01766;P01780;P01782;S4R3C0;S4R460	13	5	9	Both		7	6	7	6	8	6	5	4	4	7	6	6	9	4
IGHV3-20	EVQLVESGGGVVRPG;EVQLVESGGGVVRPGG	Immunoglobulin heavy variable 3-20	A0A0C4DH32	2	5	7	Both		2	2	2	1	2	2	2	2		2	2	2	2
LRRC8D	EVTTNIPKM	Volume-regulated anion channel subunit LRRC8D;Volume-regulated anion channel subunit LRRC8D (Fragment)	Q5VWA0;E9PJS7;E9PL08;E9PMF9;Q7L1W4	1	1	2	Both		1					1					1
FBXL4	EVVDFSSHY	F-box/LRR-repeat protein 4	Q9UKA2	1	1	3	Both		1					1				1	1
FBXO22	EVVERVLTF	F-box only protein 22;F-box only protein 22 (Fragment)	H3BRE0;H3BTH6;Q8NEZ5	1	1	3	Both		1					1				1	1
TAX1BP3	EVVRLLVTR	Tax1-binding protein 3	A0A087X282;O14907	1	1	2	Both		1						1		1
ARL1	EVVTTIPTI	ADP-ribosylation factor-like protein 1	F8VYN9;P40616	1	1	3	Both		1					1				1	1
SARDH	FAIDKTIAY	Sarcosine dehydrogenase, mitochondrial	Q5SYV2;Q9UL12	1	1	4	Both		1					1			1	1	1
BLOC1S6	FEREKQLTA	Biogenesis of lysosome-related organelles complex 1 subunit 6	H3BMT8;H3BRA4;H3BR42;H3BST1;Q9UL45	1	1	0	Benign		1
SH3GL1	FHEGDVITL	Endophilin-A2	Q99961	1	1	2	Both		1					1					1
ITGB1;ITGB2	AEDYPIDLY;AEDYPIDLYYL;AENNIQPIF;ATDDGFHFA;ATTTVMNPK;AVTTVVNPK;DHNALPDTL;DVPGKLIYGQY;EITESGRIGF;EVFNELVGKQR;FHFAGDGKL;FQTEVGKQL;HTSDVPGKLIY;LPDTLKVTY;LSEGVTISY;NEFDYPSV;NEFDYPSVGQL;NEITESGRIGF;QEQSFVIRA;QEQSFVIRALGF;RECVAGPNI;SAACPGLQL;SEDSSNVVHL;SEGVTISY;SENNIQTIF;SEVILENGKL;SMLDDLRNV;SQWNNDNPLFK;SSNVIQLII;SSNVVHLIK;TEIIPKSAV;TEIIPKSAVGEL;TSDVPGKLIY;TTTVMNPKF;TVMPYISTTPAK;VAGPNIAAI;VQINVPITF;VTEE…	Integrin beta;Integrin beta (Fragment);Integrin beta-1;Integrin beta-1 (Fragment);Integrin beta-2	A0A494C0X7;C9JPK5;D3DSM0;E5RK25;E7EQW5;E7EUI6;E7EVZ9;J3KNI6;P05107;P05556	43	4	9	Both	+	1	4	1	9		6	6	15	1	4	8	3	4	5
CR1;CR1L	DEFEFPIGTY;FEFPVGTSL;FHYGSVVTY;HENPKEVAI;HYGSVVTYR;IPYGKEISY;KELEMKKV;NTDTQFGSTVNY;TPFGDIPYGKEISY;VLFPVNLQL;YHYGDYVTL	Complement component receptor 1-like protein;Complement component receptor 1-like protein (Fragment);Complement receptor type 1;Complement receptor type 1 (Fragment)	A0A0C4DGF5;E9PDY4;E9PQN4;H0YE06;P17927;Q2VPA4;Q5SR44	11	3	6	Both		2	1		1			2		2	1	4		2	3
MEX3C	FHYNGTDVSF	RNA-binding E3 ubiquitin-protein ligase MEX3C;MEX3C variant 2	M9T4I7;Q5U5Q3	1	1	2	Both		1					1					1
ASPN	GAFEGVTVF	Asporin	Q5TBF2;Q9BXN1	1	1	2	Both		1					1					1
ABCA5;ABCA6	GEILGLLGP	ATP-binding cassette sub-family A member 5;ATP-binding cassette sub-family A member 6;ATP-binding cassette sub-family A member 5 (Fragment)	K7EJW6;Q8N139;Q8WWZ7	1	1	0	Benign		1
GPR27	GGEAAALGL	Probable G-protein coupled receptor 27	Q9NS67	1	1	0	Benign		1
TNKS;TNKS2	AESPEAAGV;ALAEYVIYR;DIAALLIKY;DVAALLIKY;EVAELLVKH;EVAELLVRH;EVAEYLLQH;EVTELLVKH;FGHAEVVSL;GHAEVVNLL;GHYEVAELL;HPQTHETAL;KEFLTPLHV;LAHGADPTL;LAHGADPTM;NHANERMLF;NHHNERMLF;QPQSHETAL;SADDVSALL	Poly [ADP-ribose] polymerase;Poly [ADP-ribose] polymerase tankyrase-1;Poly [ADP-ribose] polymerase tankyrase-2	E5RHD2;E7EQ52;E7EWY6;O95271;Q9H2K2	19	2	5	Both		2				2	5	2				12		5	3
NAA38	HIVSIEVQR	N-alpha-acetyltransferase 38, NatC auxiliary subunit	A0A0B4J297;I3L310;I3L4V0;I3L3Z2;Q9BRA0	1	1	0	Benign		1
INPP4B	HTVGLIVQY	Type II inositol 3,4-bisphosphate 4-phosphatase;Type II inositol 3,4-bisphosphate 4-phosphatase (Fragment)	E9PHC0;E9PCZ3;D6RJC3;E7EQN9;O15327	1	1	1	Both		1					1
SNURF;hCG_2042738	HVPEVEVQVKR	SNRPN upstream reading frame protein;HCG2042738, isoform CRA_a	G3V4N2;Q9Y675	1	1	0	Benign		1
UNC45B	IAFPGERVY	Protein unc-45 homolog B	Q8IWX7	1	1	1	Both		1									1
RANBP6	IAQAVPHIL	Ran-binding protein 6	O60518	1	1	2	Both		1					1			1
CHRNA5	IDVTFFPFDL	Neuronal acetylcholine receptor subunit alpha-5;Neuronal acetylcholine receptor subunit alpha-5 (Fragment)	H7BYM0;P30532	1	1	0	Benign		1
ZRANB3	IEALFPQKFG	DNA annealing helicase and endonuclease ZRANB3	F8WCT9;Q5FWF4	1	1	1	Both		1						1
RPS6KB1	IHDGTVTHTF	Ribosomal protein S6 kinase beta-1	P23443	1	1	2	Both		1					1					1
CFP	ITEGAQAPR	Properdin	E9PAQ1;P27918	1	1	0	Benign		1
BZW1;BZW2	AETLFDILV;DASGAKLDY;DPFKDIILY;EVLSEEPIL;EYVRNQQTI;FLDASGAKLDY;FLDSTGSRLDY;FSETEQTKL;FTDAGLKEL;FTEAGLKEL;FTEAGLKELSEY;GQSELTLLL;GVSAAFAVK;KAFQKIVVL;LPETAVIGL;NYAQVFNKL;QAFAQVFNK;QALKHLKQY;QYAPLLAVF;QYSPLLAAF;SAAFAVKLF;SELTLLLKI;SVMSTVEWNK	Basic leucine zipper and W2 domain-containing protein 1;Basic leucine zipper and W2 domain-containing protein 1 (Fragment);Basic leucine zipper and W2 domain-containing protein 2;Basic leucine zipper and W2 domain-containing protein 2 (Fragment);BZW2 protein	B5MCE7;B5MCH7;C9IZ80;C9J188;C9JF98;C9JFN4;C9JV57;C9JWF5;E7EMS9;E7ETZ4;E9PFD4;E9PFE3;F8WDX8;H0Y503;Q75MG1;Q7L1Q6;Q9Y6E2	23	3	9	Both		1			3	2	5	3	3	1	1	5	2	10	8
ENTPD6	KATPLVLKA	Ectonucleoside triphosphate diphosphohydrolase 6;Ectonucleoside triphosphate diphosphohydrolase 6 (Fragment)	Q5QPJ4;Q5QPJ6;H0Y6Q1;H0Y473;Q5QPI9;O75354	1	1	1	Both		1					1
2021-03-01	KAYNRVIFV	E3 ubiquitin-protein ligase MARCH1	D6RGC4;Q8TCQ1	1	1	4	Both		1					1			1	1	1
1;4;HNRNPL	GEGRGFPSV;GLIDGVVEA;GPISYVVVM;HPSNVLHFF;IEYAKPTRL;ITTDVLYTI;IYIAGHPAF;KRPSSVKVF;NAGDQHGGGGGGGGGAGAA;QEFGPISYV;QYGHPPPPP;RSVNSVLLF;VEFDSVQSA;YAVDRAITH;YHDEGYGPPPP	Heterogeneous nuclear ribonucleoprotein L;Heterogeneous nuclear ribonucleoprotein L (Fragment);Uncharacterized protein (Fragment)	A0A3B3ITJ4;B4DVF8;M0QXS5;M0QYL7;M0QYT0;M0R076;M0R1W6;P14866	15	5	9	Both		3	1	1	2	4	3	1	1	2	1	6	1	5	3
PHRF1;SCAF11	AEAPSSPDV;ESEKHTANY;FPESCNHVF;GEAHVSPEV;GESSFTYRA;GESSFTYRAY;GEVNSTKVA;GSSDVIIHR;KTLPADVQNY;KTLPADVQNYY;KVANLVKAY;LIRQKRHEL;LPADVQNYY;NEEKITESSL;NTISTGLLY;RTIFPTSTI;TEFIEASEI;THVENQSANCL;VEITEHKDFTL	PHD and RING finger domain-containing protein 1;Protein SCAF11;Protein SCAF11 (Fragment)	A0A0A0MTP7;A0A0J9YWD5;A0A0J9YX88;A0A0J9YYB5;A8MTP4;A8MUK0;B7ZM65;E9PJ24;F8VXG7;F8W6K1;F8WEF5;Q99590;Q9P1Y6	19	4	8	Both		2	1		4	2	2	1	4		1	5	2	6	2
BBS1	LANGEVRIY	Bardet-Biedl syndrome 1 protein	E7EQH1;Q8NFJ9	1	1	2	Both		1								1		1
LRRC4C	LDELDLSGN	Leucine-rich repeat-containing protein 4C	Q9HCJ2	1	4	6	Both		1		1	1	1	1		1		1	1	1	1
SPINDOC	LDLQVIRVRMEEPPAVSL	Spindlin interactor and repressor of chromatin-binding protein	Q9BUA3	1	1	0	Benign		1
ZNF571	LENYSNLISLEPARTREEQHNLPVP	Zinc finger protein 571	K7ERB9	1	1	1	Both		1								1
INKA2	LEQLEISGG	PAK4-inhibitor INKA2;PAK4-inhibitor INKA2 (Fragment)	E9PR53;E9PND8;A0A2R8YG70;Q9NTI7	1	1	3	Both		1						1				1	1
HPS6	LEQTGAQGWLSGP	Hermansky-Pudlak syndrome 6 protein	Q86YV9	1	1	0	Benign		1
MTNR1B	LGGSSAVRG	Melatonin receptor type 1B (Fragment)	H0YDG4	1	1	0	Benign		1
CERS2;CERS4	HHVATIILI;LHDSSDYLL	Ceramide synthase 2;Ceramide synthase 2 (Fragment);Ceramide synthase 4	H0YKC9;H0YKH6;H0YLQ6;H0YN04;H0YNU7;Q5SZE1;Q5SZE4;Q96G23;Q9HA82	2	1	2	Both		1					2					2
OR6T1;OR9A2;OR9A4	GTTDFFLL;LNPFIFTL	Olfactory receptor 6T1;Olfactory receptor 9A2;Olfactory receptor 9A4	Q8NGN1;Q8NGT5;Q8NGU2	2	1	1	Both		1												1
STRCP1;STRC	LQLSPHQIQA	Putative stereocilin-like protein;Stereocilin;Stereocilin (Fragment)	H7C0F7;E9PBT5;F5GXA4;A6NGW2;Q7RTU9	1	1	0	Benign		1
ZCWPW1	LSLELSVMK	Zinc finger CW-type PWWP domain protein 1	Q9H0M4	1	1	0	Benign		1
STXBP5;STXBP5L	DEGKLLIGF;LVSPTEIQR;TEVIPMLEV	STXBP5 protein;Syntaxin-binding protein 5;Syntaxin-binding protein 5-like;Syntaxin-binding protein 5-like (Fragment)	C9JQS3;E9PFI2;Q3B794;Q5T5C0;Q9Y2K9	3	1	3	Both		1					1	2						1
DNASE1	LVSYIVQGCTRHLSLR	Deoxyribonuclease-1	I3L530	1	1	0	Benign		1
CBLN2	LVVCDSSPSA	Cerebellin-2	Q8IUK8	1	1	0	Benign		1
NRM	MAAERVKAW	Nurim;Nurim (Fragment)	H0Y6T6;Q8IXM6	1	1	2	Both		1					1					1
IFI16;NOC3L	DTISKMNDF;EEGLVSQY;EVPNKIINR;FVYEPKEQK;GVIKVISGF;HATVATENEVF;KIFEDIPTL;KRPVIVKVL;KVKGPALSR;LEVNEESTV;LEVYPFTLV;LPYPSEASTTF;MSKLISEM;QTFEVPNKIINR;SEAGPNQTF;TTFPESHLR;VLNTSLKEK	Gamma-interferon-inducible protein 16;Gamma-interferon-inducible protein 16 (Fragment);Nucleolar complex protein 3 homolog	A0A0A0MRB1;H3BM18;H3BR65;H3BR88;H3BVE6;Q16666;Q8WTT2;X6RHM1	17	3	8	Both		5			1	4	2	4		2	2	6	1	2	2
PHF14	NHDQHLLLL	PHD finger protein 14	B4DG57;A0A0U1RRH6;O94880	1	1	2	Both		1					1					1
CHAMP1	NHVAAHGQSL	Chromosome alignment-maintaining phosphoprotein 1	Q96JM3	1	1	2	Both		1					1					1
EDNRA	NHVDDFTTF	Endothelin-1 receptor	P25101	1	1	2	Both		1					1					1
NEURL4	PGPPSAALGEP	Neuralized-like protein 4	I3L2W2;Q96JN8	1	1	0	Benign		1
ASPRV1	PVGGSLEDE	Retroviral-like aspartic protease 1	Q53RT3	1	1	0	Benign		1
MMP23B	QGPGAPGVLLP	Matrix metalloproteinase-23 (Fragment);MIFR-2	H0Y6I4;H0YAE5;H0YA69;O75086	1	1	0	Benign		1
USP31	QHDAQEFLL	Ubiquitin carboxyl-terminal hydrolase 31	Q70CQ4	1	1	0	Benign		1
TIFAB	QHDTSPLLL	TRAF-interacting protein with FHA domain-containing protein B	Q6ZNK6	1	1	2	Both		1					1					1
TAF7	QHQENEGTNQL	Transcription initiation factor TFIID subunit 7	Q15545	1	1	2	Both		1					1					1
HMBOX1	QIDLLQRLRRTGMTKHE	Homeobox-containing protein 1;Homeobox-containing protein 1 (Fragment)	E5RHH9;H0YLF2;E5RGZ2;H0YKJ1;Q6NT76	1	2	3	Both		1	1							1		1			1
ZNF22	QSSNLIQHR	Zinc finger protein 22	P17026	1	1	0	Benign		1
SHPK;1	RAFPLPMSF	Sedoheptulokinase;Uncharacterized protein	A0A0B4J2A0;Q9UHJ6	1	2	2	Both		1			1		1					1
SREK1	REAQSFISA	Splicing regulatory glutamine/lysine-rich protein 1;Splicing regulatory glutamine/lysine-rich protein 1 (Fragment)	H0YC47;Q8WXA9	1	1	1	Both		1					1
HSPA13	REMTILGSA	Heat shock 70 kDa protein 13	P48723	1	1	0	Benign		1
MRPL19	REYDTSKIEA	39S ribosomal protein L19, mitochondrial;39S ribosomal protein L19, mitochondrial (Fragment)	H7C2J0;P49406	1	1	0	Benign		1
STOX2	SAEPPTNEA	Storkhead-box protein 2	Q9P2F5	1	1	1	Both		1								1
LEPROT	SAFGFPVIL	Leptin receptor gene-related protein	A0A3B3ISI8;A0A087X0N2;A0A3B3ISI6;O15243	1	1	4	Both		1					1			1	1	1
SELENOV	SAIGLADPP	Selenoprotein V;Selenoprotein V (Fragment)	M0QZN9;C9IZ47;A0A087WYK0;P59797	1	1	0	Benign		1
SIVA1	SEADPSGVA	Apoptosis regulatory protein Siva;Apoptosis regulatory protein Siva (Fragment)	H0YJN1;B4DTY2;G3V439;G3V3U1;O15304	1	1	4	Both		1					1			1		1	1
ECM1	SEGGFTATGQR	Extracellular matrix protein 1	Q16610	1	1	1	Both		1												1
RSF1	SEKPGSPEA	Remodeling and spacing factor 1;Remodeling and spacing factor 1 (Fragment)	H0YER1;H0YCN2;Q96T23	1	1	2	Both		1					1			1
SMARCB1	SHDHGYTTL	SWI/SNF-related matrix-associated actin-dependent regulator of chromatin subfamily B member 1 (Fragment);SWI/SNF-related matrix-associated actin-dependent regulator of chromatin subfamily B member 1	A0A0U1RQQ2;B5MCL5;A0A2R8YEE8;G5E975	1	1	2	Both		1					1					1
EEPD1	SHDLTLVNL	Endonuclease/exonuclease/phosphatase family domain-containing protein 1	Q7L9B9	1	1	2	Both		1					1					1
TRIM32	SHFFSENEDF	E3 ubiquitin-protein ligase TRIM32	Q13049	1	1	2	Both		1					1					1
USP53	SHIDQREKI	Inactive ubiquitin carboxyl-terminal hydrolase 53	Q70EK8	1	1	1	Both		1										1
CBS;CBSL	SHILEMDHF	Cystathionine beta-synthase;Cystathionine beta-synthase-like protein;Cystathionine beta-synthase (Fragment)	H7C1W6;H7C2W0;H7C2H4;P0DN79;P35520	1	1	1	Both		1										1
DEPP1	SHLPVIHEL	Protein DEPP1	Q9NTK1	1	2	1	Both		1	1									1
SOCS2	SHSDYLLTI	Suppressor of cytokine signaling 2;Suppressor of cytokine-signaling 2 (Fragment)	F8VU91;F8VRV3;O14508	1	1	2	Both		1					1					1
LCORL	SLTTESEIL	Ligand-dependent nuclear receptor corepressor-like protein	A0A1B0GVP4	1	1	1	Both		1										1
CCN2	SMGPVRVAF	CCN family member 2	P29279	1	1	4	Both		1					1			1	1	1
KCNH4	SPSLSPALA	Potassium voltage-gated channel subfamily H member 4	Q9UQ05	1	1	0	Benign		1
FOXK1	SSAPVVVTR	Forkhead box protein K1	P85037	1	1	0	Benign		1
PLN	STIEMPQQAR	Cardiac phospholamban	P26678	1	1	0	Benign		1
GNG12	EHARSDPLL;STNNIAQAR	Guanine nucleotide-binding protein G(I)/G(S)/G(O) subunit gamma-12	Q9UBI6	2	1	1	Both		2										1
LIX1L	SVFNEHPSRR	LIX1-like protein	Q8IVB5	1	1	0	Benign		1
SLC25A4;SLC25A5;SLC25A6	SVQGIIIYR	ADP/ATP translocase 1;ADP/ATP translocase 2;ADP/ATP translocase 3	V9GYG0;P12236;P12235;P05141	1	1	2	Both		1							1						1
POLRMT	SVSEVVVNR	DNA-directed RNA polymerase, mitochondrial;DNA-directed RNA polymerase, mitochondrial (Fragment)	K7EMH3;O00411	1	1	2	Both		1							1						1
GRM2	SVSLSGSVVL	Metabotropic glutamate receptor 2	C9JL63;Q14416	1	1	0	Benign		1
IGHV4-34;IGHV4-39;IGHV4-59;IGHV4-61;IGHV4-30-4;IGHV4-4;IGHV4-31;IGHV4-30-2;IGHV4-38-2;1;4	TAADTAVYY	Immunoglobulin heavy variable 4-34;Immunoglobulin heavy variable 4-39;Immunoglobulin heavy variable 4-59;Immunoglobulin heavy variable 4-61;Immunoglobulin heavy variable 4-30-4;Immunoglobulin heavy variable 4-4;Immunoglobulin heavy variable 4-31;Immunoglobulin heavy variable 4-30-2;Immunoglobulin heavy variable 4-38-2;Uncharacterized protein (Fragment)	A0A0J9YWU9;P0DP08;A0A087WW49;A0A075B6R2;P0DP07;P0DP06;A0A0C4DH41;A0A087WSY4;P01825;P06331;P01824	1	1	3	Both		1					1					1			1
TMEM37	TAVGVQAQR	Voltage-dependent calcium channel gamma-like subunit	Q8WXS4	1	1	0	Benign		1
ST3GAL3	TEVSASLPSA	CMP-N-acetylneuraminate-beta-1,4-galactoside alpha-2,3-sialyltransferase	A0A2R8Y7B2	1	1	3	Both		1					1					1	1
NALCN	TFTLDTLLMF	Sodium leak channel non-selective protein	A0A3B3ISV8;Q8IZF0	1	1	0	Benign		1
SCARA3	THAEELYYL	Scavenger receptor class A member 3	Q6AZY7	1	1	2	Both		1					1					1
SNTA1	THDEAVQVL	Alpha-1-syntrophin	Q13424	1	1	3	Both		1					1					1		1
LDB3;PDLIM5	FPIEAGDMF;FVEEKGALY;KFIEALGHTW;SADQSPSAL;STNNMAYNK;TEFYHVPTH;THLEAQNKI	LIM domain-binding protein 3;LIM domain-binding protein 3 (Fragment);PDZ and LIM domain protein 5;PDZ and LIM domain protein 5 (Fragment)	A0A096LPD7;A0A0A0MSP3;A0A0C4DGG7;A0A0D9SFR4;H0Y8Y3;H0Y929;H0YBI4;O75112;Q96HC4	7	2	5	Both		1			1		1	1				4		3	3
PDLIM1;PDLIM4	EVLHIGSAHNR;KESEVYKML;SEATLPAQM;THLEAQNRI	PDZ and LIM domain protein 1;PDZ and LIM domain protein 4;PDZ and LIM domain protein 4 (Fragment)	C9J542;O00151;P50479	4	1	4	Both		1					1	2			1	1
PAAF1	TQDGNIYQL	Proteasomal ATPase-associated factor 1	F5H0C4;Q9BRP4	1	2	2	Both		1	1				1					1
ERVK3-1	TTQEAEKLLER	Endogenous retrovirus group K3 member 1 (Fragment);Endogenous retrovirus group K3 member 1	Q96A10;A0A0U1RQS5;B3KNS4;A0A0U1RQV1	1	1	0	Benign		1
C19orf24	TVFESRNLR	Uncharacterized membrane protein C19orf24	Q9BVV8	1	1	0	Benign		1
TIMMDC1	SQAEIYHNR;TVNTSLNVYR	Chromosome 3 open reading frame 1, isoform CRA_b;Complex I assembly factor TIMMDC1, mitochondrial;Complex I assembly factor TIMMDC1, mitochondrial (Fragment)	C9JR82;G3XA94;Q9NPL8	2	1	1	Both		2						1
SSTR3	TVSAAVWVA	Somatostatin receptor type 3	P32745	1	1	0	Benign		1
HEPACAM2	VASEKVAQKTM	HEPACAM family member 2	C9JN07;A8MVW5	1	1	0	Benign		1
IMMP2L	VAVPVAVTF	Mitochondrial inner membrane protease subunit 2;Mitochondrial inner membrane protease subunit 2 (Fragment)	C9JVB0;A0A0C4DG32;Q96T52	1	1	2	Both		1					1					1
A1CF;RBM46;RBM47	AAAAVIPTV;FAAPATATI;FPAAPAPKM;IEDGKIHTV;IHTVEHMI;RLFIGGIPK;TAEDSTAAM;TEDTIKKSF;VEYESHRAA;VPIPDVYQTY;VYDPTTTYL;YEIRPGRLL	APOBEC1 complementation factor;APOBEC1 complementation factor (Fragment);Probable RNA-binding protein 46;RNA-binding protein 47;RNA-binding protein 47 (Fragment)	A0AV96;B7Z8Z7;D6R9D6;D6R9M7;D6RA49;D6RBP6;D6RBS9;D6RCT1;D6REZ6;D6RFL5;F8W9F8;Q5T0W7;Q8TBY0;Q9NQ94	12	1	8	Both		1					2	2	1	1	1	5		3	3
TDRD5	VLRTEGHAI	Tudor domain-containing protein 5;Tudor domain-containing protein 5 (Fragment)	A0A0C4DG74;Q8NAT2	1	1	0	Benign		1
CR2	VSYGSIVTY	Complement receptor type 2	Q5SR47;P20023	1	1	2	Both		1					1					1
DGLUCY	WMSSRPEVP	D-glutamate cyclase, mitochondrial (Fragment)	H0YB62	1	1	0	Benign		1
TMEM127	YAFAHILTV	Transmembrane protein 127	C9J4H2;O75204	1	2	4	Both		1		1			1			1	1	1
ITIH5	YAFTTVSCR	Inter-alpha-trypsin inhibitor heavy chain H5;Inter-alpha (Globulin) inhibitor H5, isoform CRA_e	G5E9D8;C9J2H1;Q86UX2	1	1	2	Both		1					1			1
ATP8B1	YANNAIKTY	Phospholipid-transporting ATPase IC;Phospholipid-transporting ATPase	A0A2R8Y5C5;O43520	1	1	4	Both		1					1			1	1	1
MTHFR	YAVDLVKHI	Methylenetetrahydrofolate reductase;Methylenetetrahydrofolate reductase (Fragment)	F8W9T8;A0A286YF17;A0A286YFD0;Q5SNW7;P42898	1	1	3	Both		1					1			1		1
RTN1	YETAENPRP	Reticulon-1;Reticulon	Q2NKQ5;Q16799	1	1	2	Both		1					1			1
IKZF1;IKZF4	AEDLRMLDA;HRDQGSSAL;KSDRVVVTY;NEMMKSHVM;SHVMDQAINNAI;TPYDSSASY;YHSQDRYEF	DNA-binding protein Ikaros;DNA-binding protein Ikaros (Fragment);Zinc finger protein Eos	A0A087WU46;A0A0A0MRA0;A0A0A0MST1;A0A2R8Y4D3;A0A2R8Y4T7;A0A2R8YFR0;C9JTB0;F8VPL6;Q13422;Q3T907;Q9H2S9;R9R4D9	7	2	5	Both		1	1				3	1				1		1	1
P3H3;GPR162	AAAAHTFFV	Prolyl 3-hydroxylase 3;Probable G-protein-coupled receptor 162 (Fragment)	U3KQI6;Q8IVL6	1	0	1	Cancer							1
FAM9A	AAAEAAAAA	Protein FAM9A	Q8IZU1	1	0	1	Cancer							1
RASGRF1	AAANIIRTL	Ras-specific guanine nucleotide-releasing factor 1	Q13972	1	0	1	Cancer							1
EIF3F;RPL29	AAAPASVPA;AEDVLSGKVSA;ALNEKLVNL;APALPGPAL;AQAAAPASVPAQAPK;AQAAAPASVPAQAPKRTQAPTKASE;ASVPAQAPK;DALSTVLQY;GLRLCRPKAK;HPVILASIVDSY;LAYIAHPKLGK;RLAYIAHPK;TTHNQSRKW;VPDDFETML	60S ribosomal protein L29;Eukaryotic translation initiation factor 3 subunit F;Eukaryotic translation initiation factor 3 subunit F (Fragment)	A0A1W2PP79;A0A3B3ITT5;C9IYI4;E9PQV8;F8WF43;H0YDT6;O00303;P47914	14	3	5	Both			2		1	2	2	5	2					3	5
ATP11C	AAFEGTVFF	Phospholipid-transporting ATPase IG;Phospholipid-transporting ATPase;Phospholipid-transporting ATPase IG (Fragment)	A0A067XG57;A0A067XG54;Q8NB49	1	0	2	Cancer							1					1
SLC16A3;SLC16A8	AAAGSPVFL;AAGSPVFL;AEVLTSSLILL;GEVVHTPET;REVEHFLKA;SAIGLVLLM;VFFKELIQEF;VPPVFVVSY;YAFPKAVSV;YAFPKAVSVF;YAFPKAVSVFF	Monocarboxylate transporter 3;Monocarboxylate transporter 4;Monocarboxylate transporter 4 (Fragment)	J3KT83;J3KTI8;J3KTM6;J3QLE3;J3QQS9;J3QQV2;J3QRA0;J3QRU2;J3QSC3;O15427;O95907	11	2	7	Both		2				1	5		2	2	2	7		2	1
ZBTB47	AANVHEVL	Zinc finger and BTB domain-containing protein 47	Q9UFB7	1	0	2	Cancer							1					1
CYP26A1	AATSLITYL	Cytochrome P450 26A1	O43174	1	0	1	Cancer							1
SHROOM2	AEAETRAAD	Protein Shroom2	Q13796	1	0	2	Cancer							1					1
DNAAF1	AEAPPPPPP	Dynein assembly factor 1, axonemal	Q8NEP3	1	0	1	Cancer							1
MPND	AEDPERPNA	MPN domain-containing protein;MPN domain-containing protein (Fragment)	M0R044;M0R0F2;W4VSR2;M0R189;Q8N594	1	0	1	Cancer							1
TIMM17A	AEDPSQLP;EGAGILLTR	Mitochondrial import inner membrane translocase subunit Tim17-A	Q99595	2	1	1	Both		1					1
C1orf21	AEEEQKIAA	Uncharacterized protein C1orf21	A0A3B3ITU3;Q9H246	1	0	1	Cancer							1
ATP5ME	AEEERRIAA	ATP synthase subunit e, mitochondrial	P56385	1	0	1	Cancer							1
TVP23B;TVP23C;TVP23C-CDRT4	AEEETTNRP	Golgi apparatus membrane protein TVP23 homolog B;Golgi apparatus membrane protein TVP23 homolog C;Golgi apparatus membrane protein TVP23 homolog	E5RIS5;I3L376;E5RGC5;A0A0A6YYB9;J3KS67;C9JYS5;Q9NYZ1;Q96ET8	1	0	1	Cancer							1
UFM1	AEEFKVPAA	Ubiquitin-fold modifier 1;Ubiquitin-fold modifier 1 (Fragment)	H0Y614;P61960	1	0	1	Cancer							1
FAM110A	AAADLERFF;AEGAGRPPP	Protein FAM110A;Protein FAM110A (Fragment)	Q9BQ89;V9GZ26	2	0	2	Cancer							2					1
IGSF10	AEGRPSPTV	Immunoglobulin superfamily member 10	Q6WRI0	1	0	2	Cancer							1					1
MICAL1	AAFDAAWMV;AENELGITP	[F-actin]-monooxygenase MICAL1;[F-actin]-monooxygenase MICAL1 (Fragment)	H0Y6Z4;Q8TDZ2	2	0	1	Cancer							2
WRB;WRB-SH3BGR	AEQESQMRA	Tail-anchored protein insertion receptor WRB;Uncharacterized protein;Tail-anchored protein insertion receptor WRB (Fragment)	A0A3B3ITX9;C9JLV3;A0A096LNT6;A0A3B3IUG4;B4DLW3;H7BYE5;A0A3B3ISA8;H7C384;B7Z1T1;A0A3B3ISE9;O00258	1	0	1	Cancer							1
PSPH	AEQPPHLTP	Phosphoserine phosphatase;Phosphoserine phosphatase (Fragment)	C9JBI3;P78330	1	0	1	Cancer							1
TRNP1	AEQRSPPPP	TMF-regulated nuclear protein 1	Q6NT89	1	0	1	Cancer							1
OSBPL10;OSBPL11;OSBPL5;OSBPL8;OSBPL9	AEQVSHHPP;DEHYILTF;EEAFLRRRF;ELDPLTGEWHY;EYFVNEQSR;FLDKLSDYY;GEASQTETV;GEASQVETV;GHSPPSSSL;HLDPITQEW;ITDPSVIVM;KIRDIDAATEAK;LHSGDNFQL;LPSGTTIEW;NEAGLLEYF;NEYESRSLW;PYNPILGETF;QEAVARQTTF;QPSPLEPVI;QTEATQEKY;SSNSPISQR;TEATQEKYVL	Oxysterol-binding protein (Fragment);Oxysterol-binding protein-related protein 10;Oxysterol-binding protein-related protein 11;Oxysterol-binding protein-related protein 5;Oxysterol-binding protein-related protein 5 (Fragment);Oxysterol-binding protein-related protein 8;Oxysterol-binding protein-related protein 8 (Fragment);Oxysterol-binding protein-related protein 9;Oxysterol-binding protein-rela…	A0A096LPC8;E9PIJ6;E9PJE6;E9PLH0;E9PLN3;E9PNH0;E9PNR1;E9PPQ2;E9PQB4;E9PRA9;F8VQX7;F8VUA7;F8VVE7;F8VZ43;H0YCD7;H0YDB5;H7C487;Q96SU4;Q9BXB4;Q9BXB5;Q9BZF1;Q9H0X9	22	1	8	Both					3		4	9	3		1	4	2	6	1
FAM45BP;FAM45A	AESEITIAP	Putative protein FAM45B;Protein FAM45A	A0A3B3IRE4;Q8TCE6;Q6NSW5	1	0	1	Cancer							1
VTA1	AEVPHSTGV	Vacuolar protein sorting-associated protein VTA1 homolog	Q5TGM0;Q9NP79	1	1	3	Both						1	1					1	1
FFAR4	AGDAPLRSL	Free fatty acid receptor 4	S4R3L2;Q5NUL3	1	0	1	Cancer							1
3;H2AFJ;H2AFV;H2AFX;H2AFZ;hCG_2039566;HIST1H2AA;HIST1H2AB;HIST1H2AC;HIST1H2AD;HIST1H2AG;HIST1H2AH;HIST1H2AJ;HIST2H2AA3;HIST2H2AB;HIST2H2AC;HIST3H2A	AGLQFPVGR;AQGGVLPNI;AQGGVLPNIQAV;ASKDLKVKR;FPVGRVHRL;GAGAPVYL;GGVLPNIQ;HIHKSLIGK;IPHIHKSL;LLPKKTESHHK;LLPKKTESHK;LPNIQAVLL;LQFPVGRVHR;QGGVLPNIQ;RIIPRHLQL;SLIGKKGQQK;TIAQGGVLPNIQAV;VGAGAPVYL;VLLPKKTESHHKAKGK;VYSAAILEYL	Histone H2A;Histone H2A (Fragment);Histone H2A type 1;Histone H2A type 1-A;Histone H2A type 1-B/E;Histone H2A type 1-C;Histone H2A type 1-D;Histone H2A type 1-H;Histone H2A type 1-J;Histone H2A type 2-A;Histone H2A type 2-B;Histone H2A type 2-C;Histone H2A type 3;Histone H2A.J;Histone H2A.V;Histone H2A.Z;Histone H2AX	A0A0U1RR32;A0A0U1RRH7;A0A3B3IS11;A0A494C189;C9J0D1;C9J386;E5RJU1;H0YFX9;P04908;P0C0S5;P0C0S8;P16104;P20671;Q16777;Q6FI13;Q71UI9;Q7L7L0;Q8IUE6;Q93077;Q96KK5;Q96QV6;Q99878;Q9BTM1	20	3	7	Both		2	2			2	4	5			1	5	1	6	5
MCEMP1	AHDPDYENI	Mast cell-expressed membrane protein 1	Q8IX19	1	0	1	Cancer							1
ACPP	AHDTTVSGL	Prostatic acid phosphatase	P15309	1	0	2	Cancer							1					1
ICAM3	AHEGSTVTV	Intercellular adhesion molecule 3;Intercellular adhesion molecule 3 (Fragment)	K7EP52;K7ERN2;P32942	1	0	1	Cancer							1
MLST8	AHIDPDASYM	Target of rapamycin complex subunit LST8;Target of rapamycin complex subunit LST8 (Fragment)	H3BPT1;H3BN58;H3BSZ4;A0A0A0MR05;Q9BVC4	1	0	2	Cancer							1					1
USHBP1	AHSALVLAF	Usher syndrome type-1C protein-binding protein 1	G8JLM4;Q8N6Y0	1	0	1	Cancer							1
CDC42SE2	AHVGSGDLF;AHVGSGDLFSGMNSV	CDC42 small effector protein 2	D6REL0;Q9NRR3	2	1	2	Both		1					2					1
HCRT	APAAASVAP	Orexin	O43612	1	0	1	Cancer							1
CDC42EP5	APSPADPLL	Cdc42 effector protein 5	Q6NZY7	1	1	4	Both						1	1					1		1	1
PDE7A	ATDISRQNEY	High affinity cAMP-specific 3',5'-cyclic phosphodiesterase 7A	Q13946	1	1	3	Both					1		1						1	1
CCDC141	ATDLAQHLY	Coiled-coil domain-containing protein 141;Coiled-coil domain-containing protein 141 (Fragment)	A0A0A6YYF7;Q6ZP82	1	0	2	Cancer							1							1
GEMIN7	ATDLDVANFY	Gem-associated protein 7	Q9H840	1	1	3	Both					1		1						1	1
EVI5L	ATDMPVKNQY	EVI5-like protein	Q96CN4	1	1	3	Both					1		1						1	1
CDHR2	ATDPGFQAY	Cadherin-related family member 2	Q9BYE9	1	0	2	Cancer							1							1
TENM3	ATDPVTGDLY	Teneurin-3	Q9P273	1	0	2	Cancer							1						1
CHPT1	ATEEAPYWTY	Cholinephosphotransferase 1;Cholinephosphotransferase 1 (Fragment)	H0YI84;F8W1B3;Q8WUD6	1	0	2	Cancer							1							1
SUPT3H	ATELQSMMY	Transcription initiation protein SPT3 homolog	O75486	1	1	3	Both					1		1						1	1
EXO5	ATVLGTEIVA	Exonuclease V	Q9H790	1	0	1	Cancer							1
STARD5	AVAEKMLQY	StAR-related lipid transfer protein 5	H0YLW4;Q9NSY2	1	0	4	Cancer							1	1				1			1
KLHL2;KLHL3	AVNGLLYVV;EVYDPTTNAW	cDNA FLJ60241, highly similar to Kelch-like protein 2;Kelch-like protein 2;Kelch-like protein 3	B4DFZ5;E9PEX9;O95198;Q9UH77	2	0	3	Cancer							1				1	1
VNN2;VNN3	AVYEHAVIL;VANTHHVSL	Vascular non-inflammatory molecule 2;Vascular non-inflammatory molecule 2 (Fragment);Vascular non-inflammatory molecule 3	B4DQB2;E9PK31;E9PL76;E9PLK5;F5GYI1;J3KQ55;J3KQQ7;J3QT03;O95498;Q9NY84	2	0	2	Cancer							1		1
BSND	DAPTLEDEP	Barttin	Q8WZ55	1	0	1	Cancer							1
ZNF276	DAVGPRSGF	Zinc finger protein 276;Zinc finger protein 276 (Fragment)	H3BPJ6;H3BPT7;H3BTT0;Q8N554	1	0	2	Cancer							1					1
MCTP1	DHDLGIILL	Multiple C2 and transmembrane domain-containing protein 1;Multiple C2 and transmembrane domain-containing protein 1 (Fragment)	H0Y8M9;H0Y9S8;H0Y9Y6;H0YA70;E5RJR1;D6RA42;Q6DN14	1	0	2	Cancer							1					1
RCBTB2	DHDLLKNFI;QSYPTPVTV;REFDNPDTA	cDNA FLJ54251, highly similar to RCC1 and BTB domain-containing protein 2;cDNA FLJ58545, highly similar to RCC1 and BTB domain-containing protein 2;RCC1 and BTB domain-containing protein 2	B4DWG0;B4E372;O95199	3	1	3	Both		2					1			1		2
OR10J5	DHFFCDIYP	Olfactory receptor 10J5	Q8NHC4	1	0	1	Cancer							1
NDUFAF4	DHHFDMINI	NADH dehydrogenase [ubiquinone] 1 alpha subcomplex assembly factor 4	Q9P032	1	0	2	Cancer							1					1
NMNAT1	DHQQNSPTL	Nicotinamide/nicotinic acid mononucleotide adenylyltransferase 1;Nicotinamide/nicotinic acid mononucleotide adenylyltransferase 1 (Fragment)	K7EPD7;B1AN62;Q9HAN9	1	1	1	Both			1				1
EAF1;EAF2	DLQLSESG;NHDTGECRL;NHDTGEYVL	ELL-associated factor 1;ELL-associated factor 2	B4DWJ3;Q96CJ1;Q96JC9	3	3	4	Both		1	1		1		2				1	3		1
GRIN2C	DPPPEPSPTG	Glutamate receptor ionotropic, NMDA 2C	Q14957	1	0	1	Cancer							1
MSANTD1	DQQHILQI	Myb/SANT-like DNA-binding domain-containing protein 1	D6RDG6	1	0	2	Cancer							1					1
MGAT4B	DRLLLQGSG	Alpha-1,3-mannosyl-glycoprotein 4-beta-N-acetylglucosaminyltransferase B (Fragment)	H0YC79;H0YC11	1	0	1	Cancer							1
GBP1;GBP2;GBP3	AEEILQTYL;AEQEKTLAL;AQIENSAAVEK;AQIENSAAVQK;DSADFVSFF;FVFDRPVHR;KEKSYQEHV;KNKYYQVPR;KYLAHLEQL;MENDRVQLL;QPLTPDEYLTY;SFKDVDQMFQR;SPDENENEV;YEQQMGQKV	Guanylate binding protein 3, isoform CRA_c;Guanylate-binding protein 1;Guanylate-binding protein 2;Guanylate-binding protein 3;Guanylate-binding protein 3 (Fragment)	F6X827;H3BNS1;H3BPH2;P32455;P32456;Q5T8M0;Q9H0R5	14	1	7	Both						2	1	2	5			5	1	2	4
EFHC1	DTDEYVLKY	EF-hand domain-containing protein 1;EF-hand domain-containing protein 1 (Fragment)	A0A1B0GU13;A0A1B0GUP6;A0A1B0GTM7;A0A1B0GVR3;A0A1B0GTH2;A0A1C7CYY1;A0A1B0GTF7;A0A1B0GTB1;A0A1B0GTV6;A0A1B0GUV2;A0A1B0GVB0;Q5JVL4	1	0	2	Cancer							1						1
SCO1	DTKEAIANY	Protein SCO1 homolog, mitochondrial	J3QL56;O75880	1	0	2	Cancer							1					1
PRKRIP1	DVMGSSAGAGSGEFHVY	PRKR-interacting protein 1	Q9H875	1	0	1	Cancer							1
NUP43	DVPEKSSLF	Nucleoporin Nup43	Q8NFH3	1	0	2	Cancer							1					1
2020-03-07	DVQDRVPSY;YVQDRVPSY	E3 ubiquitin-protein ligase MARCH7	F5H6W4;Q9H992	2	1	3	Both		1					2				1	2
P4HA3	DVRPPYAEY	Prolyl 4-hydroxylase subunit alpha-3	Q7Z4N8	1	0	1	Cancer							1
TAF1C	DVTEQISRF	TATA box-binding protein-associated factor RNA polymerase I subunit C;TATA box-binding protein-associated factor RNA polymerase I subunit C (Fragment)	H3BUZ7;H3BNH3;H3BR91;Q15572	1	0	2	Cancer							1					1
USP36	DVVQELLKY	Ubiquitin carboxyl-terminal hydrolase 36;Ubiquitin carboxyl-terminal hydrolase 36 (Fragment)	K7EIH0;Q9P275	1	0	2	Cancer							1					1
HIRIP3	EAAPPGELY	HIRA-interacting protein 3	Q9BW71	1	0	2	Cancer							1					1
RNF112	EALEAELQA	RING finger protein 112	Q9ULX5	1	0	1	Cancer							1
RAD52	EAPAEAAAA	DNA repair protein RAD52 homolog	F5GX32	1	0	1	Cancer							1
PLEKHB1	EATYVRSYY	Pleckstrin homology domain-containing family B member 1;Pleckstrin homology domain-containing family B member 1 (Fragment)	F5GYU9;F5H1B8;F5GZH3;F5H866;F5GZ38;Q9UF11	1	0	2	Cancer							1					1
RC3H2	EHDAQIVHI	Roquin-2	A6NHN2;Q9HBD1	1	0	2	Cancer							1					1
RRP36	EHEKLQQLL;EVFDKTYQF	Ribosomal RNA processing protein 36 homolog;Ribosomal RNA-processing protein 36 homolog (Fragment)	Q96EU6;U3KPZ9	2	1	2	Both		1					1					2
KANSL1L	EHNSESYLL	KAT8 regulatory NSL complex subunit 1-like protein;KAT8 regulatory NSL complex subunit 1-like protein (Fragment)	H7C1T2;A0AUZ9	1	0	1	Cancer							1
RIC8A	EHSQSFTF	Synembryn-A;Synembryn-A (Fragment)	E9PI04;Q9NPQ8	1	0	1	Cancer							1
CD151	EIIAGILAY	CD151 antigen;Tetraspanin (Fragment);Tetraspanin	E9PJC8;E9PLZ6;K4DIB7;K4DIA7;E9PMR4;P48509	1	0	2	Cancer							1					1
FAM135B	EIIQHIQLY	Protein FAM135B	Q49AJ0	1	0	1	Cancer							1
LSM5	EIVGTLLGF	U6 snRNA-associated Sm-like protein LSm5	B8ZZF8;Q9Y4Y9	1	0	3	Cancer							1				1	1
CCDC58	EKNLDDLTL	Coiled-coil domain-containing protein 58;Coiled-coil domain-containing protein 58 (Fragment)	C9JQ41;H7C525;Q4VC31	1	0	1	Cancer							1
ANKRD40	ELDRQELTY	Ankyrin repeat domain-containing protein 40	Q6AI12	1	0	3	Cancer							1						1	1
LCK;LYN	DVMTALSQGY;EEANLMKTL;EPIYIITEY;FLIRESETL;IPYPGRTNADVM;KVLEEHGEW;KVLEEHGEWW;SETLKGSFSL;YPYDGIHPDDL;YPYDGIHPDDLSF	Tyrosine-protein kinase;Tyrosine-protein kinase (Fragment);Tyrosine-protein kinase Lck;Tyrosine-protein kinase Lyn;Tyrosine-protein kinase Lyn (Fragment)	E5RJ37;E9PJ92;P06239;P07948;Q573B4	10	2	8	Both			1			1	2	1	3	1	1	2		3	4
FGD1;FGD2;FGD4	AEFPHSFLV;DQIEKRNET;EPVQRIPRY;FPAEMVNKI;FPEDVVRVIF;IYQFHSQFF;RSADLPHSF;RYLFLFNNM;YAFLTGNVL	FYVE, RhoGEF and PH domain-containing protein 1;FYVE, RhoGEF and PH domain-containing protein 2;FYVE, RhoGEF and PH domain-containing protein 4	B7Z493;E9PJX4;F8VWL3;F8W1R0;P98174;Q7Z6J4;Q96M96	9	2	5	Both					1	1	2	2				4		3	2
APOH	ERVKIQEKF	Beta-2-glycoprotein 1	P02749	1	0	2	Cancer							1					1
ZNF543	ESADLIQHY	Zinc finger protein 543	Q08ER8	1	0	2	Cancer							1					1
MRPS18B	ESEEYQERY	28S ribosomal protein S18b, mitochondrial	A0A0G2JIC6;Q9Y676	1	1	3	Both					1		1						1	1
ZFAND1	ETAAKVALM	AN1-type zinc finger protein 1;AN1-type zinc finger protein 1 (Fragment)	E5RIH7;E5RHR9;E5RG60;E5RFE5;H0YBX7;E5RFU1;E5RK75;E5RJ74;E5RGE5;E5RI74;E5RIS3;Q8TCF1	1	0	1	Cancer							1
NMRK1	ETDKNGFLQY	Nicotinamide riboside kinase 1	B3KN26;Q5W125;Q9NWW6	1	1	4	Both					1		1						1	1	1
PTS	ETDNNIVVY	6-pyruvoyl tetrahydrobiopterin synthase	E9PNN3;Q03393	1	0	2	Cancer							1						1
ARMC4	ETIANVAKF	Armadillo repeat-containing protein 4	Q5T2S8	1	0	1	Cancer							1
SLX4IP	ETIDSRVQEY	Protein SLX4IP	Q5VYV7	1	0	2	Cancer							1					1
MMP25	ETVRVLMSY	Matrix metalloproteinase-25	O43923;Q9NPA2	1	0	2	Cancer							1				1
APOBEC3C;APOBEC3D;APOBEC3F	EANDRNETW;EVAEFLARH;FLAEHPNVTL;IFTARLYYF	BK150C2.9 protein;DNA dC->dU-editing enzyme APOBEC-3C;DNA dC->dU-editing enzyme APOBEC-3D;DNA dC->dU-editing enzyme APOBEC-3F	A0A087WX48;Q6ICH2;Q8IUX4;Q96AK3;Q9NRW3	4	1	5	Both			1				1	1	1			1		1
FREM1	EVDLNLLRY	FRAS1-related extracellular matrix protein 1	Q5H8C1	1	0	1	Cancer							1
POLR2D	EVFMKTLNY	DNA-directed RNA polymerase II subunit RPB4	E9PB93;E9PHV4;O15514	1	0	2	Cancer							1					1
LINGO1;LINGO2	EVGDNDLVY;LELNENIVSAVEPG	Leucine-rich repeat and immunoglobulin-like domain-containing nogo receptor-interacting protein 1;Leucine-rich repeat and immunoglobulin-like domain-containing nogo receptor-interacting protein 1 (Fragment);Leucine-rich repeat and immunoglobulin-like domain-containing nogo receptor-interacting protein 2	H0YMX3;H3BMN3;H3BQ49;Q7L985;Q96FE5	2	1	3	Both			1				1						1	1
RHBDF1;RHBDF2	EVGPAGSQF;ISSTVQRQL;LPSQDNVSL;QHVTTQLVL;VADDTAEGL	Inactive rhomboid protein 1;Inactive rhomboid protein 1 (Fragment);Inactive rhomboid protein 2	A0A1B0GXG1;F8WBS4;H0Y6L9;Q6PJF5;Q96CC6	5	0	4	Cancer							1					2		2	1
ABHD17A;ABHD17B;ABHD17C	EVIDFSHGL;EVIDFSHGLALY;EVIDFSHGLAMY;LSERADWQY	Alpha/beta hydrolase domain-containing protein 17A;Alpha/beta hydrolase domain-containing protein 17B;Alpha/beta hydrolase domain-containing protein 17C	H0YN98;Q5VST6;Q6PCB6;Q96GS6	4	1	3	Both		1					3					2		1
RANBP17;XPO7	ETSKMITMY;ETTDTTTRL;EVIRLIANF;IVNSQPPEK;IYPSYMPIL;KIYIGDQVQK;SEHFSFLGI;VFIGKIITNL;YETTDTTTRL	Exportin-7;Exportin-7 (Fragment);RAN binding protein 17, isoform CRA_f;Ran-binding protein 17;Ran-binding protein 17 (Fragment)	E5RIW1;E7ESC6;H0YBE1;H0YBM6;Q8IVM9;Q9H2T7;Q9UIA9	9	1	6	Both						2	1	2	1			5	1	1
FRA10AC1	EVISGKGQFF	Protein FRA10AC1	Q70Z53	1	0	2	Cancer							1					1
COASY	EVLDFITHLY	Bifunctional coenzyme A synthase;Bifunctional coenzyme A synthase (Fragment)	K7EP09;K7ESK6;K7ES73;K7EN91;Q13057	1	0	2	Cancer							1					1
IRAK2	EVLTGIPAM	Interleukin-1 receptor-associated kinase-like 2	O43187	1	0	2	Cancer							1					1
POLH	EVMEIMSRF	DNA polymerase eta;DNA polymerase eta (Fragment)	Q5JTF2;Q9Y253	1	0	2	Cancer							1					1
WDR41	EVNPGNLLY	WD repeat-containing protein 41	D6RGW4	1	0	1	Cancer							1
ORMDL1;ORMDL2;ORMDL3	ATYVFLHTV;EVNPNTRVM;GMYIFLHTV;KFLTITPIVL;KYDAAHFLI;NVIHNLATY;VLIPKLPQL;VLLPKLPQF	ORM1-like protein 1;ORM1-like protein 1 (Fragment);ORM1-like protein 2;ORM1-like protein 3;ORM1-like protein 3 (Fragment)	A0A1B0GXE7;F6WST4;F8VWV8;F8VXD5;J3KTF9;J3QRM9;Q53FV1;Q8N138;Q9P0S3	8	2	5	Both			3			2	1		3			3		1	2
IGHV3-38	EVQLVESGGGLVQPR;EVQLVESGGGLVQPRG;EVQLVESGGGLVQPRGS;EVQLVESGGGLVQPRGSLRL	Immunoglobulin heavy variable 3-38 (non-functional) (Fragment)	A0A0C4DH36	4	5	9	Both		3	1	2	2	2	2	1	1	1	2	1	2	2	1
IGHV3-53	EVQLVETG;EVQLVETGG;EVQLVETGGG;EVQLVETGGGL;EVQLVETGGGLIQPG;EVQLVETGGGLIQPGG	Immunoglobulin heavy variable 3-53	P01767	6	5	8	Both		1	5	3	6	6	6	4	3	2	6	5	5	5
DGKE	EVVGVYGSF	Diacylglycerol kinase epsilon;Diacylglycerol kinase (Fragment)	I3L112;P52429	1	0	1	Cancer							1
MELTF	EVYDQEVGTSY	Melanotransferrin;Melanotransferrin (Fragment)	C9JVN1;P08582	1	0	1	Cancer							1
RERGL	FAFAKALIY	Ras-related and estrogen-regulated growth inhibitor-like protein	F5H686;Q9H628	1	0	1	Cancer							1
SLC47A2	FALSGPLFL	Multidrug and toxin extrusion protein 2;Multidrug and toxin extrusion protein 2 (Fragment)	C9JAE6;Q86VL8	1	0	1	Cancer							1
PLK3	FASYMEQHL	Serine/threonine-protein kinase PLK3	Q9H4B4	1	0	1	Cancer							1
ISCA2	FEQGGARVV	Iron-sulfur cluster assembly 2 homolog, mitochondrial	Q86U28	1	1	2	Both						1	1					1
F11	FFGVQEIII	Coagulation factor XI;Coagulation factor XI (Fragment)	X6R3B1;P03951	1	0	1	Cancer							1
MTFR1L	FGSSFHSTT	Mitochondrial fission regulator 1-like;Mitochondrial fission regulator 1-like (Fragment)	E9PPF9;E9PLD2;Q9H019	1	0	1	Cancer							1
IFNGR1	FGYDKPHVL	Interferon gamma receptor 1	A0A2R8YFL3;A0A2R8Y7R1;A0A2R8Y4U4;P15260	1	0	1	Cancer							1
DCAF4L1;DCAF4	FHDSAVTSV	DDB1- and CUL4-associated factor 4-like protein 1;DDB1- and CUL4-associated factor 4	Q86SY2;G3V3D6;Q3SXM0;Q8WV16	1	0	1	Cancer							1
PIK3CA;PIK3CD	DEYFLEKY;DYKDQLKTGER;EVAPHPVYY;FHIDFGHFL;HFLGNFKTKF;HRAQYEPLF;HYCVTIPEI;KSKNPGEAL;LPTGVYLNF;LTDDELFQY;LTDDKLSQY;QSNPAPQVQK;QYEPLFHML;VEQPEDYTL	Phosphatidylinositol 4,5-bisphosphate 3-kinase catalytic subunit;Phosphatidylinositol 4,5-bisphosphate 3-kinase catalytic subunit alpha isoform;Phosphatidylinositol 4,5-bisphosphate 3-kinase catalytic subunit delta isoform	A0A2R8Y2F6;F8W9P4;O00329;P42336;Q5SR50;sp|P42336_P13_PIK3CA|PK3CA_HUMANPhosphatidylinositol4,5-bisphosphate3-kinasecatalyticsubunitalphaisoformOS=HomosapiensOX=9606GN=PIK3CAPE=1SV=2	14	4	7	Both	+	1	1		2	1	4	2	3			3	1	4	2
PIK3CB;PIK3CG	AVLDKVKTK;FHIDFGHIL;FPDELEEML;FSDENVRAI;GETPIKNFQW;HPPSEESQAF;SEQDFVLRV;VEANIQHGQQVL;VRAEMPNQL;VRAIAVQKL	Phosphatidylinositol 4,5-bisphosphate 3-kinase catalytic subunit beta isoform;Phosphatidylinositol 4,5-bisphosphate 3-kinase catalytic subunit beta isoform (Fragment);Phosphatidylinositol 4,5-bisphosphate 3-kinase catalytic subunit gamma isoform	H0Y871;H7C565;P42338;P48736;Q68DL0	10	2	7	Both	+		1			2	2		2		1	2	1	3	2
GTF2A1	FHSEEQQLL	Transcription initiation factor IIA subunit 1	P52655	1	0	2	Cancer							1					1
EHD1;EHD2;EHD3;EHD4	ALANHLIKV;ALASHLIEA;ALKELYRTK;DEFSEAIKAF;DEMLTHDI;DLFKDIQSL;EEFALANHL;FHEFHSPAL;FHSPALEDADF;FPDCQKMQEL;IETQQLMRV;KEPELFQTV;KLPNSVLGR;KVHAYIISY;KYDEIFYNL;LPLEEAYRF;LPLEEHYRF;MPLLRQEEL;MPSQVVKGGAF;NHEDKIRVVL;QEETSTPTQL;QELLMAHDF;QELLQTQDF;RVHAYIISY;TEVGVQGGAF;TYDEIFYTL;VHAYIISSL;VHAYIISYL;VIDSPGIL;VYDELFYTL	EH domain-containing protein 1;EH domain-containing protein 1 (Fragment);EH domain-containing protein 2;EH domain-containing protein 3;EH domain-containing protein 4	A0A024R571;C9IZH1;C9J2Z4;C9JC03;C9JDQ8;C9JIJ3;Q9H223;Q9H4M9;Q9NZN3;Q9NZN4	30	3	8	Both			5	1		3	3	11	2		5	1	1	6	6
NPY4R2;NPY4R	FSDFLMCLL	Neuropeptide Y receptor type 4-2;Neuropeptide Y receptor type 4	P0DQD5;P50391	1	0	2	Cancer							1					1
CHL1	FSEDGSFIGAY	Neural cell adhesion molecule L1-like protein;Neural cell adhesion molecule L1-like protein (Fragment)	H7C0J0;A0A087X0M8;O00533	1	0	1	Cancer							1
SLC1A3;SLC1A6	FSFPGELLM;GVIGGQLAMY;IFIAQVNNF	Amino acid transporter;Amino acid transporter (Fragment);Excitatory amino acid transporter 1;Excitatory amino acid transporter 4;Excitatory amino acid transporter 4 (Fragment)	A0A087WT87;A0A087X0U3;E7EUS7;E7EUV6;M0QY32;M0R063;M0R106;P43003;P48664	3	0	2	Cancer							1					3
SCAMP3	FSNPAVRTA	Secretory carrier-associated membrane protein 3	O14828	1	0	1	Cancer							1
PMM2	FTDPRTMGY	Phosphomannomutase 2;Phosphomannomutase	H3BRM0;H3BV55;O15305	1	1	2	Both					1		1							1
RAMAC;RAMACL	FTENDKEYQEY	RNA guanine-N7 methyltransferase activating subunit;RNA guanine-7 methyltransferase-activating subunit-like (pseudogene)	A0A3B3IU46;Q9BTL3	1	1	3	Both					1		1						1	1
C5AR1	DTMAQKTQAV;FTRSTVDTM	C5a anaphylatoxin chemotactic receptor 1	P21730	2	0	1	Cancer							2
TRIT1	FVDPLVTNY	tRNA dimethylallyltransferase;tRNA dimethylallyltransferase (Fragment);cDNA FLJ60623, highly similar to tRNA isopentenyltransferase, mitochondrial	S4R2X1;B4DK89;S4R3U8;S4R2Z0;Q9H3H1	1	1	3	Both					1		1						1	1
PTPRD;PTPRF;PTPRS	ENSNLEVN;FVVDPMAEY;GEDRGRHVV;MPHVQDPSL;NIPLLPMEQ;RLEEKSRVK;SAVPFKILY	PTPRD protein;Receptor-type tyrosine-protein phosphatase delta;Receptor-type tyrosine-protein phosphatase F;Receptor-type tyrosine-protein phosphatase F (Fragment);Receptor-type tyrosine-protein phosphatase S	A0A0A0MR60;F5GWR7;G8JL96;H0Y380;H0Y4H1;H0Y6Z7;H0Y7Z9;P10586;P23468;Q13332;Q3KPI9	7	1	6	Both						1	3	1		1		2		1	1
RPS6KA4;RPS6KA5	EVFHDQLHTF;FTEHEVQIY;GAYGKVFLV;HHDQLHTYL;KEHLFFQKI;LFDHNNAVM;SVENAPLAKR;VERPGVTNV;YAFQTETKL;YELDLREPAL	Ribosomal protein S6 kinase;Ribosomal protein S6 kinase alpha-4;Ribosomal protein S6 kinase alpha-4 (Fragment);Ribosomal protein S6 kinase alpha-5;Ribosomal protein S6 kinase alpha-5 (Fragment)	A0A0A6YYC0;A0A3B3ISL8;E9PJN1;G3V2D1;H0YJE1;O75582;O75676	10	2	3	Both		1				3	4		1			2
PHKA2	GAYGTMTYL	Phosphorylase b kinase regulatory subunit alpha, liver isoform	P46019	1	0	1	Cancer							1
BCL2L12	GEAAGSPVP	Bcl-2-like protein 12;BCL2L12 protein isoform 9;BCL2L12 protein isoform 8;BCL-2-like protein 12 isoform 10;BCL2L12 protein isoform 5;BCL-2-like protein 12 isoform 19	M0R1Z8;M0R1K0;I6LK00;M0QZM6;I6LJZ9;A0A087WSV0;I6LJZ7;Q9HB09	1	0	1	Cancer							1
TNFRSF13C	GEDPGTTPP	Tumor necrosis factor receptor superfamily member 13C	Q96RJ3	1	0	1	Cancer							1
TMEM94	GEEEPSKTQP	Transmembrane protein 94;Transmembrane protein 94 (Fragment)	J3QSG7;J3QQW3;Q12767	1	0	1	Cancer							1
LDHA;LDHAL6A;LDHAL6B;LDHC	ATLKDQLIYNL;ATLKDQLIYNLLK;EVIKLKGYTSW;GEHGDSSVP;GSLFLRTPK;ISDLVKVTL;VADLAESI	L-lactate dehydrogenase;L-lactate dehydrogenase A chain;L-lactate dehydrogenase A chain (Fragment);L-lactate dehydrogenase A-like 6A;L-lactate dehydrogenase A-like 6B;L-lactate dehydrogenase C chain	A0A087WUM2;F5GWW2;F5GXC7;F5GXH2;F5GXU1;F5GXY2;F5GYU2;F5GZQ4;F5H245;F5H5G7;F5H5J4;F5H6W8;F5H8H6;G3XAP5;P00338;P07864;Q6ZMR3;Q9BYZ2	7	0	5	Cancer							2		2		1	1			3
SLC1A1	FAFPGEILM;GEIARTGST	Excitatory amino acid transporter 3	P43005	2	0	3	Cancer							2			1		1
TELO2	GEMEPPALP	Telomere length regulation protein TEL2 homolog	H3BRS3;Q9Y4R8	1	0	1	Cancer							1
FAM131A	GEQEARFAA	Protein FAM131A;Protein FAM131A (Fragment)	C9JY59;C9JP51;C9JPT9;A0A1W2PQP7;Q6UXB0	1	0	1	Cancer							1
DPH3	GETVPAPSA	DPH3 homolog	Q96FX2	1	0	1	Cancer							1
CD247	GHDGLYQGL	T-cell surface glycoprotein CD3 zeta chain	P20963	1	0	2	Cancer							1					1
PNPLA6;PNPLA7	AEIQSRLAY;ARDSTVLRL;ELYEKVFSR;GHFEKPLFL;IEDPSLLNSRVLL;KLPEGTLGH;NYLGLTNEL;SEMEEEKSIL	Neuropathy target esterase;Neuropathy target esterase (Fragment);Patatin-like phospholipase domain-containing protein 7	A0A384DVU0;F2Z2D4;M0QXH7;M0QYT1;M0R2C2;M0R2K2;Q6ZV29;Q8IY17	8	0	4	Cancer							1	2	3			3
PADI3;PADI4	DQKVQISYY;EVSPPVTVR;FPDTDFPGLITL;GHVDEFLSF;KEFSKAEAF;VVVDIAHGPPAK;YPSNDSRQM	Protein-arginine deiminase type-3;Protein-arginine deiminase type-4	B1AQ67;Q9ULW8;Q9UM07	7	1	6	Both						1	2	1		1	1			1	1
PSD2	GLSLGLSLT	PH and SEC7 domain-containing protein 2	Q9BQI7	1	0	2	Cancer							1		1
ZBTB12	GLVEAAAVA	Zinc finger and BTB domain-containing protein 12	Q9Y330	1	0	1	Cancer							1
CTSF	GTDWGEKGYY	Cathepsin F	Q9UBX1	1	0	1	Cancer							1
DOCK6;DOCK7;DOCK8	ADYKRSSSL;AEGEGISKV;AEIPADPKLY;DELEKLSLL;DEYEMKDRVTY;DMKKKTLQL;DYKRSSSL;EALQPLINR;EAMASIINR;EVTDVDSVVGR;FAFESVVAI;FESVVAIANSL;FPDQVQDLVF;GEDASNAMP;HAFPYIKTR;HSLESQVTF;HYLNLNLFF;IADLPSTQL;IASDIVSRF;ISVIQKEEF;KAVSAIHSL;KVSTQVLQK;KYLPVGCVTF;LEFPTREVY;LLDPRSYHTY;LPEEGVEL;NADETVLQKW;NHLEKFFTL;NYGLRTFLF;PYLDKFFAL;PYLDKFFTL;QEVYTAVTY;RAFDSIVNK;REFQEDPEM;REFQEDPEML;RPRGELHEQY;RSAVFSVTY;SYLPVGSVSF;SYVHYVF…	Dedicator of cytokinesis protein 6;Dedicator of cytokinesis protein 6 (Fragment);Dedicator of cytokinesis protein 7;Dedicator of cytokinesis protein 7 (Fragment);Dedicator of cytokinesis protein 8;Dedicator of cytokinesis protein 8 (Fragment)	A0A0U1RQJ5;A0A0U1RRC1;A0A1B0GWE0;A2A369;A2A370;C9J613;C9J7A3;E9PDJ4;K7EP20;K7ERK2;K7ESB7;Q8NF50;Q96HP0;Q96N67	43	4	7	Both		2	3		4	5	3	8	8		1	13		11	6
TRAP1	ETDIVVDHY;HEEFYRYVA	Heat shock protein 75 kDa, mitochondrial;Heat shock protein 75 kDa, mitochondrial (Fragment)	I3L0K7;I3L239;Q12931	2	0	3	Cancer							2						1	1
PAFAH2	HEQSRIITV	Platelet-activating factor acetylhydrolase 2, cytoplasmic	Q99487	1	1	1	Both						1	1
PIEZO2	HHANPILLL	Piezo-type mechanosensitive ion channel component 2;Piezo-type mechanosensitive ion channel component 2 (Fragment);Piezo-type mechanosensitive ion channel component	J3QLJ9;J3KRQ5;E7EVM7;Q9H5I5	1	0	1	Cancer							1
NDUFV3	HHDYSTYTF	NADH dehydrogenase [ubiquinone] flavoprotein 3, mitochondrial	P56181	1	0	2	Cancer							1					1
RFTN2	HHESGQYQM	Raftlin-2	Q52LD8	1	0	2	Cancer							1					1
ALPL	HHNPGEETRL	Alkaline phosphatase, tissue-nonspecific isozyme	P05186	1	0	1	Cancer							1
KCTD15;KCTD1	HIDVGGHMY	BTB/POZ domain-containing protein KCTD15;BTB/POZ domain-containing protein KCTD1;BTB/POZ domain-containing protein KCTD1 (Fragment);BTB/POZ domain-containing protein KCTD15 (Fragment)	K7EPF0;K7EQS3;J3QLL6;K7EM48;K7EN63;J3KSG1;J3QRK1;A0A2U3U043;Q719H9;Q96SI1	1	1	3	Both					1		1						1	1
ZNF547;ZNF548;4	HLDEAQRLLY	Zinc finger protein 547;Zinc finger protein 548;Uncharacterized protein (Fragment);Zinc finger protein 548 (Fragment);Zinc finger protein 547 (Fragment)	M0QX63;M0R354;M0QX17;M0R3F2;M0QY53;M0QXE2;M0R2Z0;M0R1H3;M0R041;M0QYW2;Q8IVP9;Q8NEK5	1	1	3	Both					1		1						1	1
PRSS56	HNDLALVQL	Serine protease 56	R4GMZ0;P0CW18	1	0	2	Cancer							1					1
LIPH	HSDTDALGY	Lipase member H	Q8WWY8	1	0	2	Cancer							1							1
KCNK3	HSSPGGGGRY	Potassium channel subfamily K member 3;KCNK3 protein	B9EIJ4;O14649	1	0	1	Cancer							1
MAPK14	HTDDEMTGY	Mitogen-activated protein kinase 14;Mitogen-activated protein kinase 14 (Fragment);Mitogen-activated protein kinase	E7EX54;B4E0K5;Q16539	1	1	2	Both					1		1							1
DTWD1	HTDILKEKY	DTW domain-containing protein 1	Q8N5C7	1	1	4	Both					1		1						1	1	1
ID2;ID4	AFSPVRSVR;EAAADEPAL;HVIDYILDL;KTPVDDPMSLLY;NTDPAGAVNK;TPVDDPMSL;TPVDDPMSLLY	DNA-binding protein inhibitor ID-2;DNA-binding protein inhibitor ID-4	P47928;Q02363	7	2	6	Both					2	1	1	2		1		1		2	2
SCRN2	HVITGLLEHY	Secernin-2;Secernin-2 (Fragment)	J3QR84;J3QRJ1;J3QL71;Q96FV2	1	0	2	Cancer							1					1
ELANE	IAPNFVMSA	Neutrophil elastase	P08246	1	0	1	Cancer							1
HACD2	IAVGLVRAY	Very-long-chain (3R)-3-hydroxyacyl-CoA dehydratase 2	Q6Y1H2	1	0	1	Cancer							1
CAMK2B;CAMK2D;CAMK2G	DEYQLFEEL;IAYIRLTQY;SAAKSLLNK	Calcium/calmodulin-dependent protein kinase (CaM kinase) II delta, isoform CRA_e;Calcium/calmodulin-dependent protein kinase (CaM kinase) II gamma, isoform CRA_d;Calcium/calmodulin-dependent protein kinase (CaM kinase) II gamma, isoform CRA_n;Calcium/calmodulin-dependent protein kinase type II subunit beta;Calcium/calmodulin-dependent protein kinase type II subunit beta (Fragment);Calcium/calmodu…	A0A2Q3DQE3;D6R938;E9PBG7;E9PF82;H0Y6G2;H0Y9J2;H7C394;Q13554;Q13555;Q13557;Q5SWX3;Q8WU40	3	0	3	Cancer							1	2							1
LINC00526	IDAGLFSQG	Putative uncharacterized protein encoded by LINC00526	Q96FQ7	1	0	1	Cancer							1
CLSTN3	ALDKDAPLRY;IELQTSHVA	Calsyntenin-3;Calsyntenin-3 (Fragment)	F5H172;F5H5C6;F5H5D7;F5H746;F5H7C7;Q9BQT9	2	0	2	Cancer							2							1
RAB32;RAB38	EAVGAFVVF;IGVDFALKV	Ras-related protein Rab-32;Ras-related protein Rab-38;Ras-related protein Rab-38 (Fragment)	H0YEA4;P57729;Q13637	2	0	2	Cancer							1								1
PRIM1	IHDELQQSF	DNA primase small subunit;DNA primase (Fragment)	F8VNY2;P49642	1	0	2	Cancer							1					1
SNCAIP	IHDENGNNL;IHDENGNNLL	Synphilin-1	Q9Y6H5	2	1	2	Both		1					1					1
CALCRL	IHDIENVLL	Calcitonin gene-related peptide type 1 receptor	Q16602	1	0	2	Cancer							1					1
TAF3	IHNIEPVTF	Transcription initiation factor TFIID subunit 3	Q5VWG9	1	0	2	Cancer							1					1
TLR9;4	IHSQVSQQL	Toll-like receptor 9;Uncharacterized protein (Fragment)	H0Y858;Q9NR96	1	1	2	Both			1				1					1
ATAD2;ATAD2B	AYAIIKEEL;IHSSIVSTL;ITVEKALAI;KYLTVKDYL;LYPEIFEKF;LYPEVFEKF;VYTLDIPVL;VYVPHIHVW	ATPase family AAA domain-containing protein 2;ATPase family AAA domain-containing protein 2B	A0A0B4J211;Q6PL18;Q9ULI0	8	1	5	Both			1				1					5	1	6	1
MAPK7	IHSSQPLTL	Mitogen-activated protein kinase 7;Mitogen-activated protein kinase (Fragment);Mitogen-activated protein kinase 7 (Fragment)	J3KT61;I3L0J8;C9JUK9;Q13164	1	0	2	Cancer							1					1
ATP8A1	IIDGKTLKY	Phospholipid-transporting ATPase IA	Q9Y2Q0	1	0	2	Cancer							1							1
C3orf70	ISDLFIDNY	UPF0524 protein C3orf70	A6NLC5	1	0	2	Cancer							1						1
SAMD9;SAMD9L	AEGKLISVEY;DEFSNPYRY;GSSSVILEK;ISDTLGQVY;ITHGPAIQI;ITIPITPAF;LVNSTILKL;NYIPYLTKL;QHDVQTLLL;SEEVTGLVL;SVNSHIYQR;TATEVDIKM;TEVDIKMKF;VESPGDPLI;VEVLLPNSTL	Sterile alpha motif domain-containing protein 9;Sterile alpha motif domain-containing protein 9 (Fragment);Sterile alpha motif domain-containing protein 9-like;Sterile alpha motif domain-containing protein 9-like (Fragment)	A0A0B4J1Y6;C9JKF1;Q5K651;Q8IVG5	15	2	7	Both					2	1	2	3	5			3	2	2	2
ZNF440	KAFHSPRSY	Zinc finger protein 440	Q8IYI8	1	0	2	Cancer							1					1
ZNF778	KASPVSSSL	Zinc finger protein 778	A0A0A0MSW5;Q96MU6	1	0	2	Cancer							1					1
FOXA2	GELKGTPAA;KAYEQVMHY	Hepatocyte nuclear factor 3-beta	Q9Y261	2	0	2	Cancer							2					1
PACSIN1;PACSIN2	HAACKEEKL;HHAACKEEKL;IYHDLEQSI;KEAEDGFRKA;YHDLEQSI	Protein kinase C and casein kinase substrate in neurons protein 1;Protein kinase C and casein kinase substrate in neurons protein 2;Protein kinase C and casein kinase substrate in neurons protein 2 (Fragment)	A0A0U1RR22;B0QYG7;B0QYG8;F6U236;Q9BY11;Q9UNF0	5	0	3	Cancer							2					1		2
SF3A2	KEAPAQPAP	Splicing factor 3A subunit 2;Splicing factor 3A subunit 2 (Fragment)	K7EMT0;Q15428	1	0	1	Cancer							1
IFT27	AHFQKSYTL;KEMENFEAP	Intraflagellar transport protein 27 homolog;Intraflagellar transport protein 27 homolog (Fragment)	B1AH58;F5GZ09;H0Y6C7;Q9BW83	2	0	2	Cancer							2					1
NEUROD4	KHEDKSPI	Neurogenic differentiation factor 4	Q9HD90	1	0	1	Cancer							1
SH3BGR;WRB-SH3BGR	KPQNGIPLP	SH3 domain-binding glutamic acid-rich protein;Uncharacterized protein;SH3 domain-binding glutamic acid-rich protein (Fragment)	A0A3B3ITX9;C9JJT2;C9JX40;H7C2G0;P55822	1	0	1	Cancer							1
NUDT19	KQFHRIVTY	Nucleoside diphosphate-linked moiety X motif 19	A8MXV4	1	0	4	Cancer							1			1	1	1
SIPA1;SIPA1L1;SIPA1L2;SIPA1L3	EEPQNRTSAY;FSEQQLDLY;HEEASRPAA;HYDVQSLLF;IYNSQREHF;KTDSTGTHSLY;KVINAENAAHK;REYGSTSSI;SLNSNDSAMLK	Signal-induced proliferation-associated 1-like protein 1;Signal-induced proliferation-associated 1-like protein 1 (Fragment);Signal-induced proliferation-associated 1-like protein 2;Signal-induced proliferation-associated 1-like protein 3;Signal-induced proliferation-associated protein 1;Signal-induced proliferation-associated protein 1 (Fragment)	E9PIB3;F5GYF8;F6RY50;H0YJY2;O43166;O60292;Q96FS4;Q9P2F8	9	2	7	Both					2	1	2	2	2			1	1	2	4
C15orf41	KTPDFILQV	Uncharacterized protein C15orf41;Uncharacterized protein C15orf41 (Fragment)	H3BMD3;H3BNF9;A0A2R8Y7J6;A0A2R8YEZ2;A0A2R8YD89;H3BS01;Q9Y2V0	1	0	2	Cancer							1					1
FBXL12	LDAGLQELSYLQ	F-box/LRR-repeat protein 12	Q9NXK8	1	0	1	Cancer							1
ANKS3	LDLNKKNGGG	Ankyrin repeat and SAM domain-containing protein 3;Ankyrin repeat and SAM domain-containing protein 3 (Fragment)	K7EJX3;K7EPY5;K7EKD2;K7ERR7;Q6ZW76	1	0	1	Cancer							1
HIPK4	LDQIETVNG	Homeodomain-interacting protein kinase 4	Q8NE63	1	0	1	Cancer							1
DKK4	LERQLDEQD	Dickkopf-related protein 4	Q9UBT3	1	0	1	Cancer							1
CD4	LESPPGSSP	T-cell surface glycoprotein CD4	F5H480;P01730	1	0	1	Cancer							1
FFAR2	EQVRSGNEI;LGVAFPVQY	Free fatty acid receptor 2	O15552	2	0	1	Cancer							2
SELENOS	LHTTVGSLL	Selenoprotein S	Q9BQE4	1	0	1	Cancer							1
ZNF773;ZNF419;ZNF671;4	LLDDAQRLLY	Zinc finger protein 773;Zinc finger protein 419;Zinc finger protein 671;Uncharacterized protein;Zinc finger protein 419 (Fragment)	M0R2W2;M0R143;E5RI89;E5RIA3;M0QYZ8;E5RGL3;E5RHZ9;E5RJT6;M0QX16;E5RHS2;E5RHW2;A6NNZ3;Q6PK81;Q96HQ0;Q8TAW3	1	1	3	Both					1		1						1	1
4;ZNF124;ZNF136;ZNF20;ZNF625;ZNF625-ZNF20;ZNF627;ZNF670;ZNF788P;ZNF84;ZNF844;ZNF878	KAFGSPNSL;LLDPSQKNLY	Putative KRAB domain-containing protein ZNF788;Uncharacterized protein;Uncharacterized protein (Fragment);Zinc finger protein 124;Zinc finger protein 136;Zinc finger protein 20;Zinc finger protein 20 (Fragment);Zinc finger protein 625 (Fragment);Zinc finger protein 627;Zinc finger protein 670;Zinc finger protein 84;Zinc finger protein 84 (Fragment);Zinc finger protein 844;Zinc finger protein 878;…	A0A494BZV4;A0A494C069;C9JIP4;C9JN71;F2Z3I2;F5H0T0;F5H1B1;F5H1R3;F5H3F5;F5H630;F5H6X5;F8WDT6;F8WE48;H3BVH4;H7C2C9;J3KQ53;J3QKQ6;K7EKY8;M0QYR3;P17024;P51523;P52737;Q08AG5;Q15973;Q6ZQV5;Q7L945;Q9BS34	2	1	4	Both					1		1					1	1	1
CRBN	LPIDDVLRI	Protein cereblon;Protein cereblon (Fragment)	J3QT87;A0A1W2PPJ5;Q96SW2	1	1	1	Both				1			1
SEC22A	LQKEFITTY	Vesicle-trafficking protein SEC22a;Vesicle-trafficking protein SEC22a (Fragment)	C9J463;C9JZ27;C9JDJ8;C9JRY4;C9JNZ0;Q96IW7	1	0	2	Cancer							1					1
MFSD3	LSAFPVLY	Major facilitator superfamily domain-containing protein 3	Q96ES6	1	0	1	Cancer							1
WDR27;4	LSDIVIEKY	WD repeat-containing protein 27;Uncharacterized protein;WD repeat-containing protein 27 (Fragment)	F8VUY7;A0A3B3IRT0;A0A3B3ISN9;A0A3B3IT90;B4DDD4;A0A3B3ITY5;A0A3B3IS64;A0A3B3ITF5;A2RRH5	1	1	3	Both					1		1						1	1
OSGEP	LSDSGVTQRY	Probable tRNA N6-adenosine threonylcarbamoyltransferase	Q9NPF4	1	1	4	Both					1		1						1	1	1
LMBR1L	LSLRALLAP	Protein LMBR1L	E7ESX7	1	0	1	Cancer							1
ATP5F1A	ASDAAPLQY;ILGADTSVDLEETGRVL;LTDADAMKY;SIGDGIARVH;TSVDLEETGRVL	ATP synthase subunit alpha, mitochondrial;ATP synthase subunit alpha, mitochondrial (Fragment)	K7EJP1;K7EK77;K7ENJ4;K7EQH4;K7ERX7;K7ESA0;P25705	5	3	4	Both		3	1		1		2			1			2	1
TARSL2	LTDFIREEY	Threonine--tRNA ligase 2, cytoplasmic;TARSL2 protein	B7ZLP8;A2RTX5	1	1	4	Both					1		1						1	1	1
CLIP3;CLIP4	AEVGDQVLV;KVNTGLMTSK;LTDMTLLHY;NEMGTVRY;SLEHRQSYPK	CAP-Gly domain-containing linker protein 3;CAP-Gly domain-containing linker protein 3 (Fragment);CAP-Gly domain-containing linker protein 4;CAP-Gly domain-containing linker protein 4 (Fragment)	B5MCH3;E7EW06;G3XAK3;K7ESF3;Q8N3C7;Q96DZ5	5	1	6	Both					1		1	3				1	2	1	1
MALT1	EHTEVLQLL;LTDPIQGTEY	Mucosa-associated lymphoid tissue lymphoma translocation protein 1;Mucosa-associated lymphoid tissue lymphoma translocation protein 1 (Fragment)	A0A3B3IS32;A0A3B3IS82;K7EP42;Q9UDY8	2	1	2	Both			1				2					1
MRPL52	LTELPDWSY	39S ribosomal protein L52, mitochondrial;39S ribosomal protein L52, mitochondrial (Fragment)	G3V4J1;G5E9P5;Q86TS9	1	1	4	Both					1		1						1	1	1
SMIM11A	EHVPLLLYI;LTFAGVKMY	Small integral membrane protein 11A	P58511	2	0	2	Cancer							2					1
PCDHA13;PCDHA4;PCDHA5;PCDHA7;PCDHA9	LNGDIVYSF;LTGTVQLLI;VPDLEFKSL	Protocadherin alpha-13;Protocadherin alpha-4;Protocadherin alpha-5;Protocadherin alpha-7;Protocadherin alpha-9	A0A087WSW8;C9JA99;D6RA20;Q9UN72;Q9UN74;Q9Y5H5;Q9Y5H7;Q9Y5I0	3	1	2	Both					1		1							1
HARS;HARS2	LTVPFARYL;VFDVIIRCF	Histidine--tRNA ligase, cytoplasmic;Histidine--tRNA ligase, cytoplasmic (Fragment);Probable histidine--tRNA ligase, mitochondrial;Probable histidine--tRNA ligase, mitochondrial (Fragment)	A0A2R8Y3N3;A0A2R8Y4X6;A0A2R8Y5E8;A0A2R8Y5P7;A0A2R8Y6I1;B3KWE1;B4DDD8;D6RJE6;E7ETE2;P12081;P49590	2	0	2	Cancer							1								1
OTOP2	LVSLSGSIIY	Proton channel OTOP2	Q7RTS6	1	0	1	Cancer							1
PCNP	MEGKVPVAA	PEST proteolytic signal containing nuclear protein, isoform CRA_c	A0A0B4J1Z9	1	0	1	Cancer							1
LDB1	MHAQDPQML	LIM domain-binding protein 1	Q86U70	1	0	2	Cancer							1					1
R3HDM4	MLDNSFERL	R3H domain-containing protein 4	K7EIG9;Q96D70	1	0	1	Cancer							1
RGS19	MQEPSAHTF	Regulator of G-protein signaling 19	P49795	1	0	2	Cancer							1					1
C11orf52	MSEDSNLHY	Uncharacterized protein C11orf52	Q96A22	1	0	2	Cancer							1							1
FBLN2	NAYTGVVYL	Fibulin-2	P98095	1	0	1	Cancer							1
CACNA2D1	NHDDYTNQI	Voltage-dependent calcium channel subunit alpha-2/delta-1	P54289	1	0	2	Cancer							1					1
COX15	NHDMTLTEF	Cytochrome c oxidase assembly protein COX15 homolog	Q7KZN9	1	0	2	Cancer							1					1
LMAN2L	NHDVISLKL	VIP36-like protein	Q9H0V9	1	0	2	Cancer							1					1
EDC3	NHDVQVILF	Enhancer of mRNA-decapping protein 3;Enhancer of mRNA-decapping protein 3 (Fragment)	H3BPN4;Q96F86	1	0	2	Cancer							1					1
OIT3	NHGIFPFTL	Oncoprotein-induced transcript 3 protein	Q8WWZ8	1	0	2	Cancer							1					1
BEX3	NHHDHHDEF	Protein BEX3	Q00994	1	0	2	Cancer							1					1
EIF4E	NHIQLSSNL	Eukaryotic translation initiation factor 4E;Eukaryotic translation initiation factor 4E (Fragment)	H0Y8J7;D6RBW1;P06730	1	0	1	Cancer							1
TMEM232	NHLLWHCVAAW	Transmembrane protein 232	C9JQI7	1	0	1	Cancer							1
TEAD1	NHSYSDPLL	Transcriptional enhancer factor TEF-1	E9PKB7;H0YE88;P28347	1	0	2	Cancer							1					1
RAPGEF4	NHVDQEHHF	Rap guanine nucleotide exchange factor 4;cDNA FLJ50956, highly similar to Rap guanine nucleotide exchange factor 4	B7Z278;E9PB94;Q8WZA2	1	0	2	Cancer							1					1
ERRFI1	NIDPITMAY	ERBB receptor feedback inhibitor 1	K7EJB4;Q9UJM3	1	0	2	Cancer							1						1
ITGBL1	NSDGSGLVY	Integrin beta-like protein 1	A0A087WXI7;A0A087WY35;O95965	1	0	3	Cancer							1						1	1
AGTPBP1	NSDINSNHY	Cytosolic carboxypeptidase 1	J3KNS1;Q9UPW5	1	1	4	Both					1		1						1	1	1
ZNF385D	NSDSQAAAHY	Zinc finger protein 385D;Zinc finger protein 385D (Fragment)	A0A2R8YG37;Q9H6B1	1	0	3	Cancer							1						1	1
GLT8D2	NTDANILFY	Glycosyltransferase 8 domain-containing protein 2;Glycosyltransferase 8 domain-containing protein 2 (Fragment)	F8VZP2;Q9H1C3	1	1	4	Both					1		1						1	1	1
YIPF5	NTDFYQTSY	Protein YIPF5	Q969M3	1	1	4	Both					1		1						1	1	1
RAD51	IVDSATALY;NTDHQTQLLY	DNA repair protein RAD51 homolog 1	Q06609	2	1	4	Both	+				1		2						2	2	1
GLIS1	PFQSPPPPP	Zinc finger protein GLIS1	A0A0D9SEX9;Q8NBF1	1	0	1	Cancer							1
GLB1L	PLSLTLLLP	Beta-galactosidase-1-like protein;Beta-galactosidase-1-like protein (Fragment)	C9JE41;F8WCT5;C9J1Y9;Q6UWU2	1	0	1	Cancer							1
DMBT1	PRPDTLSTI	Deleted in malignant brain tumors 1 protein	Q9UGM3	1	0	1	Cancer							1
ROGDI	AASGLTRMF;PSDLLVNVY	Protein rogdi homolog;Protein rogdi homolog (Fragment)	K7EID1;K7EJ96;K7EPN1;K7EPS3;Q9GZN7	2	1	3	Both					1		2						1	1
NPY1R	PSDSHRLSY	Neuropeptide Y receptor type 1;Neuropeptide Y receptor type 1 (Fragment)	D6REY0;P25929	1	0	2	Cancer							1							1
MAP4K2	LSSPPGTLPP;PTDNPEAHSNLY	Mitogen-activated protein kinase kinase kinase kinase 2	Q12851	2	0	4	Cancer							2						1	1	1
TTC9B	PTDTNVLRY	Tetratricopeptide repeat protein 9B	Q8N6N2	1	0	2	Cancer							1							1
1;5;H3.Y;H3F3A;H3F3B;H3F3C;HIST2H3A	AAIGALQEA;FQSAAIGAL;KSAPSTGGVK;KSAPSTGGVKK;LELCELVA;QEASEAYLV;QEASEAYLVGL;SADPGNLKY;SEAYLVGL;VETGLLGTY;VYGNKFYYL	Histone H3;Histone H3 (Fragment);Histone H3.2;Histone H3.3;Histone H3.3 (Fragment);Histone H3.3C;Histone H3.Y;Putative histone H3.X;Putative uncharacterized protein FLJ36925;Putative uncharacterized protein LOC152225;Putative uncharacterized protein LOC645739;Putative uncharacterized SMG1-like protein;Uncharacterized protein	A0A2R8Y7G9;B4DEB1;K7EK07;K7EMV3;K7EP01;K7ES00;P0DPK2;P0DPK5;P84243;Q0VG73;Q6NXT2;Q6P435;Q71DI3;Q8N9L7;Q9H521	11	2	7	Both			1		1		3	1	1	1		2		2	2
LLPH	QEIATVVVP	Protein LLP homolog	Q9BRT6	1	0	1	Cancer							1
NACA;NACA2;NACA4P	IEDLSQQAQL;QENTQTPTV;SPASDTYIVF	Nascent polypeptide-associated complex subunit alpha;Nascent polypeptide-associated complex subunit alpha (Fragment);Nascent polypeptide-associated complex subunit alpha, muscle-specific form;Nascent polypeptide-associated complex subunit alpha-2;Putative nascent polypeptide-associated complex subunit alpha-like protein	E9PAV3;F8VNW4;F8VZ58;F8VZJ2;F8W0W4;F8W1N5;H0YHX9;Q13765;Q9BZK3;Q9H009	3	1	6	Both						2	1		1			1	1	1	1
4;LIME1	AASPVVAEY;QHGSPAPTL	Lck-interacting transmembrane adapter 1;Lck-interacting transmembrane adapter 1 (Fragment);Uncharacterized protein (Fragment)	A0A087WT39;A0A087WT57;A0A087WUJ1;A0A087WZP9;A0A0J9YYD9;Q9H400;V9GYI1;V9GYV3	2	1	3	Both		1					2			1		2
KRBOX4;ZNF674	QLDSAQKNLY;QVDEQIDHY	KRAB domain-containing protein 4;KRAB domain-containing protein 4 (Fragment);Zinc finger protein 674;Zinc finger protein 674 (Fragment)	C9J804;C9J950;E5RHV3;Q2M3X9;Q5JUW0	2	1	3	Both					1		2						1	2
TUBB2A;TUBB2B;TUBB4A;TUBB4B;TUBB6;TUBB8	GMGTLLLSK;HGIDPTGSY;QDATAEEEGEFEEEAEEEVA;QLERINVYY;RSGPFGQLF;WLPNNVKTA	Tubulin beta chain;Tubulin beta chain (Fragment);Tubulin beta-2A chain;Tubulin beta-2B chain;Tubulin beta-4A chain;Tubulin beta-4A chain (Fragment);Tubulin beta-4B chain;Tubulin beta-6 chain;Tubulin beta-6 chain (Fragment);Tubulin beta-8 chain	A0A075B724;A0A075B736;K7EJ64;K7EJZ4;K7EK43;K7EL29;K7EN98;K7EPE5;K7EQT3;K7ERA8;K7ES63;K7ESM5;K7ESQ3;M0QX14;M0QY37;M0QY85;M0QYM7;M0QZL7;M0R0X0;M0R278;M0R2D3;P04350;P68371;Q13885;Q3ZCM7;Q5SQY0;Q9BUF5;Q9BVA1	6	2	4	Both			1		1		1					2		3	1
DDX52	QRDNTVHSF	Probable ATP-dependent RNA helicase DDX52	Q9Y2R4	1	0	2	Cancer							1					1
STON1;STON1-GTF2A1L	QSDDLPQFQYF	Stonin-1;Protein STON1-GTF2A1L;STON1-GTF2A1L readthrough	Q53S48;A0A0A6YYG5;Q9Y6Q2	1	1	2	Both					1		1							1
DYM	FQDIMQNIDL;QSDGGGLLY	Dymeclin;Dymeclin (Fragment)	J3KRG4;J3KSF9;J3QQT7;J3QRF2;J3QSE7;Q7RTS9	2	0	3	Cancer							2						1	1
FOXJ2	QSPTSIASY	Forkhead box protein J2	Q9P0K8	1	0	2	Cancer							1					1
LMOD1	QTEKQSTGVY	Leiomodin-1;LMOD1 protein	Q9BV00;P29536	1	1	4	Both					1		1						1	1	1
IL13RA1	QTETHNVFY	Interleukin-13 receptor subunit alpha-1	A0A494C1C4;P78552	1	0	3	Cancer							1						1	1
TOPAZ1	QTVECLQSL	Protein TOPAZ1	Q8N9V7	1	0	1	Cancer							1
HERVK_113;ERVK-24;ERVK-6;ERVK-8;ERVK-19;ERVK-21;ERVK-7;ERVK-9	RDQIVTVSV	Endogenous retrovirus group K member 113 Env polyprotein;Endogenous retrovirus group K member 24 Env polyprotein;Endogenous retrovirus group K member 6 Env polyprotein;Endogenous retrovirus group K member 8 Env polyprotein;Endogenous retrovirus group K member 19 Env polyprotein;Endogenous retrovirus group K member 21 Env polyprotein;Endogenous retrovirus group K member 7 Env polyprotein;Endogenou…	P61567;P61566;Q9UKH3;P61565;Q902F9;Q902F8;Q69384;O71037;P63135	1	0	1	Cancer							1
MAP3K11;MAP3K21	EVIGIGGFGKVYR;REEELTRAA	Mitogen-activated protein kinase kinase kinase 11;Mitogen-activated protein kinase kinase kinase 21	Q16584;Q5TCX8	2	0	2	Cancer							1	1
IGKV3-7	REIVMTQSP	Immunoglobulin kappa variable 3-7 (non-functional) (Fragment)	A0A075B6H7	1	0	1	Cancer							1
UBXN1	LPDGTSLTQTF;REKAEELAA	UBX domain-containing protein 1;UBX domain-containing protein 1 (Fragment)	A0A087WTZ5;E9PJ81;E9PRQ7;E9PS08;Q04323	2	1	5	Both						1	2	1				1		1	1
PPP1R15B	FLEEVTEYY;REKPAAPTA	Protein phosphatase 1 regulatory subunit 15B	Q5SWA1	2	0	1	Cancer							2
MAP1LC3B2;MAP1LC3B	REQHPTKIP	Microtubule-associated proteins 1A/1B light chain 3 beta 2;Microtubule-associated proteins 1A/1B light chain 3B;Microtubule-associated protein 1 light chain 3 beta, isoform CRA_f	H3BTE7;H3BTL1;Q9GZQ8;A6NCE7	1	0	1	Cancer							1
CEACAM4	REQPPPASTP	Carcinoembryonic antigen-related cell adhesion molecule 4	M0R363;O75871	1	0	1	Cancer							1
DCP1B	DVASQVALY;RHDPYINRI	cDNA FLJ57612, highly similar to mRNA decapping enzyme 1B;mRNA-decapping enzyme 1B	B4DVJ6;F5H4R4;Q8IZD4	2	0	2	Cancer							2					2
G3BP1;G3BP2	AVYGQKEIHRK;DENELKEFF;DIHHKVLSL;ELKDFFQSY;ELKEFFMSF;EYLHRFYGR;HPDSHQLFI;NGKPADAVY;QEDLRTFSW;QEEKPEPVL;QSYGNVVEL;RHVDAHATL;RLRGPGGPR;RRFMQTFVL;RTFSWASVTSK;RYPDSHQLF;VLAPEGSVANK;VLAPEGSVPNK	Ras GTPase-activating protein-binding protein 1;Ras GTPase-activating protein-binding protein 1 (Fragment);Ras GTPase-activating protein-binding protein 2;Ras GTPase-activating protein-binding protein 2 (Fragment)	D6R9A4;D6R9X5;D6RAC7;D6RB17;D6RBM9;D6RBR0;D6RBW8;D6RE13;D6REX8;D6RGJ4;E5RH42;E5RI46;E5RIF8;E5RIZ6;E5RJU8;Q13283;Q9UN86	18	2	8	Both			1	2			1	7	2	1	3	4		1	5
NOTCH3	RPMSPPPPP	Neurogenic locus notch homolog protein 3;Neurogenic locus notch homolog protein 3 (Fragment)	M0R3C9;Q9UM47	1	0	1	Cancer							1
KLF1;KLF12;KLF2;KLF4;KLF5;KLF7;KLF9	EVHPSPVSR;FDDAAAAAA;FPPPFGGPGF;KTIKNINTF;KTYTKSSHLK;REGAPGPAA;RSDELTRHY;SEYGSPSVI;YAATIASKL	Krueppel-like factor 1;Krueppel-like factor 12;Krueppel-like factor 2;Krueppel-like factor 4;Krueppel-like factor 5;Krueppel-like factor 7;Krueppel-like factor 9	A0A087X0S4;O43474;O75840;Q13351;Q13886;Q13887;Q9Y4X4;Q9Y5W3	9	2	7	Both		1			1		4	1	1	1		2		2	2
LYSMD2	QRLDLQIKL;RSYGSTASV	LysM and putative peptidoglycan-binding domain-containing protein 2	H0YK98;Q8IV50	2	1	1	Both			1				2
ANKRD34A	RYSASPLTL	Ankyrin repeat domain-containing protein 34A	Q69YU3	1	1	2	Both			1				1					1
MED13;MED13L	DEANIAWKY;ETFGEAGQKY;PTDGDSHAVTY;SAADSPSIL;TPVPDGKNAM;VSDELVQQY;VYPSAFVLI;VYVGTAVNL	Mediator of RNA polymerase II transcription subunit 13;Mediator of RNA polymerase II transcription subunit 13 (Fragment);Mediator of RNA polymerase II transcription subunit 13-like;Mediator of RNA polymerase II transcription subunit 13-like (Fragment)	A0A3B3IRX3;A0A3B3IS46;A0A3B3IS48;F8VRB8;H0YHC1;J3QRB7;Q71F56;Q9UHV7	8	1	5	Both					2		3	1				4	1	3
MRPS36	SASRVVQVV	28S ribosomal protein S36, mitochondrial	P82909	1	0	1	Cancer							1
PTCH2	SAYLPGRPDI	Protein patched homolog 2	Q9Y6C5	1	0	1	Cancer	+						1
TWISTNB	SEAPRPAAA	DNA-directed RNA polymerase I subunit RPA43	Q3B726	1	0	1	Cancer							1
MAGEH1	SEASETPMA	Melanoma-associated antigen H1	Q9H213	1	0	1	Cancer							1
CD82	SEDYSKVP	CD82 antigen;CD82 antigen (Fragment)	H0YD57;P27701	1	0	1	Cancer							1
BCL11A	SEHGSPLTP	B-cell lymphoma/leukemia 11A;B-cell lymphoma/leukemia 11A (Fragment)	A0A2R8Y7B0;A0A2R8Y2E8;A0A0J9YXG2;A0A2R8YDW6;A0A2U3TZJ5;Q9H165	1	0	1	Cancer							1
USP25	QTALPGNDRY;SELPSTSP	Ubiquitin carboxyl-terminal hydrolase 25;Ubiquitin carboxyl-terminal hydrolase 25 (Fragment);USP25 protein	H7C253;Q96B65;Q9UHP3	2	1	3	Both					1		2						1	1
TMEM266	SEPGPSPPP	Transmembrane protein 266	Q2M3C6	1	0	1	Cancer							1
BAX	SEQIMKTGA	Apoptosis regulator BAX	Q07812	1	0	1	Cancer	+						1
SUSD6	SETVMVHQA	Sushi domain-containing protein 6	Q92537	1	0	1	Cancer							1
SOCS3	SEVPEQPSA	Suppressor of cytokine signaling 3	O14543	1	0	1	Cancer							1
EML3	SHDNVIYIY;THDDSHLVSL	Echinoderm microtubule associated protein like 3, isoform CRA_c;Echinoderm microtubule associated protein like 3, isoform CRA_e;Echinoderm microtubule associated protein like 3, isoform CRA_f;Echinoderm microtubule-associated protein-like 3;Echinoderm microtubule-associated protein-like 3 (Fragment)	B7WPE2;G3V195;G3V1D0;H0Y3M3;H7C355;Q32P44	2	2	2	Both		1	1				2					2
MTSS2	SHEQPSGATL	Protein MTSS 2	A0A087WXN9;Q765P7	1	0	2	Cancer							1					1
SWT1	SHNQEITVF	Transcriptional protein SWT1	Q5T5J6	1	0	1	Cancer							1
HSH2D	SHSHVGYTL	Hematopoietic SH2 domain-containing protein;Hematopoietic SH2 domain-containing protein (Fragment)	K7ES08;A0A087X0V9;K7EP18;Q96JZ2	1	0	1	Cancer							1
C20orf27	SHVHFDEKL	UPF0687 protein C20orf27;UPF0687 protein C20orf27 (Fragment)	H7BYU9;Q9GZN8	1	0	2	Cancer							1					1
PXMP2	SLDVGGPLRY	Peroxisomal membrane protein 2;Peroxisomal membrane protein 2 (Fragment)	F5GZF7;F5H4N4;F5GXM0;Q9NR77	1	1	1	Both					1		1
TAS2R16	SLMLSSPTL	Taste receptor type 2 member 16	Q9NYV7	1	0	1	Cancer							1
SETDB2	SSDKITTGY	Histone-lysine N-methyltransferase SETDB2	X6R383;A0A087WYZ9;Q96T68	1	1	2	Both					1		1							1
MMP8	SSDPGALMY	Neutrophil collagenase;Neutrophil collagenase (Fragment)	H7C1M3;P22894	1	0	2	Cancer							1							1
HSPA14	SSDPQAQKY	Heat shock 70 kDa protein 14;Heat shock 70 kDa protein 14 (Fragment)	H7C2A1;Q0VDF9	1	1	3	Both					1		1						1	1
MAPK8IP1	SSDPDPAAY;SSDTSALSY	C-Jun-amino-terminal kinase-interacting protein 1	E9PBB9;Q9UQF2	2	0	3	Cancer							2						1	1
CEMIP2	SSWKPGDQI	Cell surface hyaluronidase	F5H6B2;Q9UHN6	1	0	1	Cancer							1
MMP1	STDIGALMY	Interstitial collagenase	P03956	1	0	2	Cancer	+						1							1
MYO7B	STDILTLVY	Unconventional myosin-VIIb	Q6PIF6	1	0	2	Cancer							1							1
ST6GALNAC3	STGWFTFLL	Alpha-N-acetylgalactosaminide alpha-2,6-sialyltransferase 3	Q8NDV1	1	0	1	Cancer							1
ZNF451	FHDPESAQQHF;SVEESVLLY	E3 SUMO-protein ligase ZNF451	E9PH99;Q9Y4E5	2	2	3	Both		1			1		2					1		1
DIS3L	SVVDDIPEF	DIS3-like exonuclease 1	Q8TF46	1	0	2	Cancer							1					1
MPLKIP	SVVDISQQY	M-phase-specific PLK1-interacting protein	Q8TAP9	1	0	2	Cancer							1					1
ZNF865	TAAAPSTV	Zinc finger protein 865	P0CJ78	1	0	1	Cancer							1
MLEC	TAVALLRLL	Malectin	F5GX14;Q14165	1	0	3	Cancer							1					1		1
RFXANK	TEADSGYTP	DNA-binding protein RFXANK	A0A024R7P0;O14593	1	0	1	Cancer							1
TMEM80	TEAERPLAA	Transmembrane protein 80;Transmembrane protein 80 (Fragment)	E9PQJ9;Q96HE8	1	0	1	Cancer							1
SOD2	GIDVWEHAY;HHAAYVNNL;TEEKYQEALA	Superoxide dismutase (Fragment);Superoxide dismutase [Mn], mitochondrial;Superoxide dismutase 2, mitochondrial, isoform CRA_a	F5GXZ9;F5GYZ5;F5H3C5;F5H4R2;G5E9P6;G8JLJ2;P04179	3	1	2	Both					1		3					1
TYSND1	TEGGGVFTA	Peroxisomal leader peptide-processing protease	Q2T9J0	1	0	1	Cancer							1
TTC23L	TEVSPKTAE	Tetratricopeptide repeat protein 23-like;Tetratricopeptide repeat protein 23-like (Fragment)	A0A1W2PP54;A0A3B3IS63;Q6PF05	1	0	3	Cancer							1					1	1
ZNF202	THAAEELYL	Zinc finger protein 202	O95125	1	0	2	Cancer							1					1
MAGI3	SHDNIVQLI;THADVVQMF	Membrane-associated guanylate kinase, WW and PDZ domain-containing protein 3	Q5TCQ9	2	0	2	Cancer							2					2
BAP1	THALLSVLL;VVKPPGSSL	Ubiquitin carboxyl-terminal hydrolase;Ubiquitin carboxyl-terminal hydrolase (Fragment);Ubiquitin carboxyl-terminal hydrolase BAP1	C9J7L9;F8W6N3;Q92560	2	2	4	Both		1	1				2		1	1		1
DBF4	THDSGLITI	Protein DBF4 homolog A	Q9UBU7	1	0	2	Cancer							1					1
BCAT2	THEDGVLEL	Branched-chain-amino-acid aminotransferase, mitochondrial;Branched-chain-amino-acid aminotransferase;Branched-chain-amino-acid aminotransferase (Fragment)	M0QZP4;B3KSI3;M0QZ10;M0QXF9;O15382	1	0	2	Cancer							1					1
TM2D1	THFTGNEVGF	TM2 domain-containing protein 1;TM2 domain containing 1, isoform CRA_c	U3KPW4;J3KPA2;Q9BX74	1	0	2	Cancer							1					1
FOXF1	THSLEQPYL	Forkhead box protein F1	Q12946	1	0	1	Cancer							1
PAOX	SAFPHLRVL;THSMDLVAL	Peroxisomal N(1)-acetyl-spermine/spermidine oxidase	Q6QHF9	2	0	3	Cancer							2				1	2
LETMD1	QQTDFLDIY;THTTVIHQL	LETM1 domain-containing protein 1;LETM1 domain-containing protein 1 (Fragment)	F8VP71;F8VR33;F8VS60;F8VVQ3;F8VZA2;F8W0R0;F8W1Z2;H0YHF4;H0YIV5;Q6P1Q0	2	1	3	Both			1				2					1		1
TCTN3	TLDSALNAASYY	Tectonic-3;Chromosome 10 open reading frame 61	A0A0C4DFN5;Q6NUS6	1	1	2	Both					1		1							1
ABCB5	TLVTLSTSPLIMASAAACSRMVISL	ATP-binding cassette sub-family B member 5	Q2M3G0	1	0	2	Cancer							1							1
NME8	TPEQIEKIY	Thioredoxin domain-containing protein 3	Q8N427	1	1	2	Both					1		1							1
CHCHD4	TPSSAELVA	Mitochondrial intermembrane space import and assembly protein 40	Q8N4Q1	1	0	1	Cancer							1
DAB1	TPSTNSPPTP	Disabled homolog 1	O75553	1	0	1	Cancer							1
C9orf16	TRLEFQQQL	UPF0184 protein C9orf16	Q9BUW7	1	1	2	Both			1				1					1
EVI2B	TSAGQPLAY	Protein EVI2B	P34910	1	1	3	Both					1		1						1	1
TRBV20-1;TRBV20OR9-2	AVVSQHPSW;TSAHPEDSSFY	T cell receptor beta variable 20/OR9-2 (non-functional) (Fragment);T cell receptor beta variable 20-1;T cell receptor beta variable 20-1 (Fragment)	A0A075B6H5;A0A075B6N2;A0A5B4	2	0	2	Cancer							1							2
PDE8B	TSDDHVIQY	High affinity cAMP-specific and IBMX-insensitive 3',5'-cyclic phosphodiesterase 8B;Phosphodiesterase;High affinity cAMP-specific and IBMX-insensitive 3',5'-cyclic phosphodiesterase 8B (Fragment)	D6R9W0;A0A2R8Y4E6;O95263	1	0	1	Cancer							1
NPTN	TSSSHTLTY	Neuroplastin;Neuroplastin (Fragment)	H3BQ94;Q9UFM8;Q9Y639	1	1	3	Both					1		1						1	1
PFKP	TTDFIYQLY	ATP-dependent 6-phosphofructokinase, platelet type	B1APP6;Q01813	1	1	3	Both					1		1						1	1
TANGO2	TTDVDSLSY	Transport and Golgi organization protein 2 homolog;Transport and Golgi organization protein 2 homolog (Fragment)	C9JDT9;A0A0A0MSI5;C9J695;Q6ICL3	1	1	3	Both					1		1						1	1
CPAMD8	TTDYLVQGY	C3 and PZP-like alpha-2-macroglobulin domain-containing protein 8	A0A494C0S9;Q8IZJ3	1	1	2	Both					1		1							1
LCT	TTEAQTALY	Lactase-phlorizin hydrolase	P09848	1	0	1	Cancer							1
NUDT5	TVDARVYSY	ADP-sugar pyrophosphatase	A6NFX8;Q9UKK9	1	1	2	Both					1		1							1
CD300A;CD300C	GSLSVQCRYEKEHRTLNKFWCR;KTSTITTAF;VAGPVGGSL	CMRF35-like molecule 6;CMRF35-like molecule 8	J3QKQ4;Q08708;Q9UGN4	3	1	4	Both					1		1		1	1		1
LAPTM4A	VAISSLTYL	Lysosomal-associated transmembrane protein 4A	Q15012	1	0	1	Cancer							1
PSMD10	VAKGGLGLI	26S proteasome non-ATPase regulatory subunit 10	B1AJY5;B1AJY7;O75832	1	0	1	Cancer							1
ARL6IP6	VARDLRAEF	ADP-ribosylation factor-like protein 6-interacting protein 6	Q8N6S5	1	0	3	Cancer							1			1		1
MOCS1	VAVASAVVL	Molybdenum cofactor biosynthesis protein 1	Q9NZB8	1	0	2	Cancer							1							1
GSE1	AAYYHPSYL;VEKPVGVAA	Genetic suppressor element 1;Genetic suppressor element 1 (Fragment)	C9JLW9;H0Y613;H7C3B5;Q14687	2	0	2	Cancer							2			1
3;PPM1A;PPM1B	AVYDGHAGSQVAK;EHITTNEDF;EYMRNFSDL;NVIEAVYNR;VEMEDAHTA	Protein phosphatase 1A;Protein phosphatase 1A (Fragment);Protein phosphatase 1B;Protein phosphatase 1B (Fragment);Uncharacterized protein	A0A3B3IS24;B8ZZF0;C9JIR6;E9PJN3;E9PKB5;E9PL75;O75688;P35813	5	0	6	Cancer							2	2		1		1		1	1
ADAMTS18	VEVDSAGSY	A disintegrin and metalloproteinase with thrombospondin motifs 18	B4DEX3;Q8TE60	1	0	1	Cancer							1
RPS10;RPS10-NUDT3;RPS10P5	SLKSRGYVK;VHMPKHPEL;YLTNEGIQYL	40S ribosomal protein S10;Putative 40S ribosomal protein S10-like;RPS10-NUDT3 readthrough;RPS10-NUDT3 readthrough (Fragment)	A0A1W2PQS6;A0A2R8Y6L3;A0A2R8Y7H1;A0A2R8YFH6;F6U211;P46783;Q9NQ39;S4R435	3	0	4	Cancer							1		1			1			1
TAGAP	RPIQDILTI;VHSSITSDDSL	T-cell activation Rho GTPase-activating protein	Q8N103	2	0	1	Cancer							2
MRPS17;hCG_1984214	VLDPYLLKY	28S ribosomal protein S17, mitochondrial;HCG1984214, isoform CRA_a;28S ribosomal protein S17, mitochondrial (Fragment)	E9PE17;I3L0E3;Q9Y2R5	1	1	3	Both					1		1						1	1
CRYGD	VLEGSWVLY	Gamma-crystallin D	P07320	1	0	2	Cancer							1							1
BPI	VLQPHQNFLLFGADV	Bactericidal permeability-increasing protein	A0A2R8YDF1;H0Y738;P17213	1	0	1	Cancer							1
SOX17	VSDASSAVYY	Transcription factor SOX-17	Q9H6I2	1	0	2	Cancer							1							1
FAM210B	VSVPLIVRY	Protein FAM210B, mitochondrial	Q96KR6	1	0	3	Cancer							1			1		1
MRAS	VTDKASFEH	Ras-related protein M-Ras;Ras-related protein M-Ras (Fragment)	C9J8Q6;O14807	1	0	2	Cancer							1							1
FCAR	HQDYTTQNL;VTDSIHQDY	Immunoglobulin alpha Fc receptor;Immunoglobulin alpha Fc receptor (Fragment)	A0A0G2JLU6;A0A0G2JM27;A0A0G2JM28;A0A0G2JNH4;A0A0G2JPP7;A0A0G2JPZ0;A0A0G2JPZ4;P24071	2	0	1	Cancer							2
DNM1L	QSELVGQLY;VTDSIRDEY	Dynamin-1-like protein;Dynamin-1-like protein (Fragment)	F8VZ52;G8JLD5;O00429	2	1	4	Both					2		2						2	2	1
RNF219	VTDTSMDTY	RING finger protein 219	Q5W0B1	1	0	1	Cancer							1
EPHX2	VTEEEIQFY	Bifunctional epoxide hydrolase 2	E5RFH6;E5RFU2;P34913	1	0	2	Cancer							1							1
ITCH;WWP2	FTVDGIPYF;KFIDTGFTL;LPVGGFADLM;RVYYVDHVEK;VTEENKEEY;YFDEKELEL	E3 ubiquitin-protein ligase Itchy homolog;NEDD4-like E3 ubiquitin-protein ligase WWP2	O00308;Q96J02	6	1	5	Both						1	1	2				2		2	2
BMF	VTEEPQRLFY	Bcl-2-modifying factor	Q96LC9	1	1	2	Both					1		1							1
SLC43A2	VTFPGIKLI	Large neutral amino acids transporter small subunit 4	Q8N370	1	0	3	Cancer							1					1		1
HDGF;HDGFL1	AEAERAAEA;FPYEESKEKF;GEEKEAATL;IENNPTVKA;NPEGEEKEA;TANKYQVFF;WEIENNPTV	Hepatoma-derived growth factor;Hepatoma-derived growth factor-like protein 1	P51858;Q5TGJ6	7	2	6	Both		1			1		3		1			1	1	1	1
MTURN	ETERRMDFY;YADPGVSFY	Maturin	Q8N3F0	2	0	4	Cancer							2						2	2	2
SLC16A1	YAFPKSITV;YAFPKSITVF	Monocarboxylate transporter 1;Monocarboxylate transporter 1 (Fragment)	P53985;Q5T8R3;Q5T8R4;Q5T8R5	2	0	2	Cancer							2					1
IGFBP5	YAGPAQSL	Insulin-like growth factor-binding protein 5;Insulin-like growth factor-binding protein 5 (Fragment)	C9JXX4;P24593	1	0	2	Cancer							1					1
STAM	FASEVSNVL;VAKDPGTVA;YAKLQNQPY	Signal transducing adapter molecule 1;Signal transducing adapter molecule 1 (Fragment)	A6NMU3;Q92783	3	1	6	Both		2					2		1	1	1	2		1
COX7C	FATPFLVVR;SAFATPFLV;YEEGPGKNLP	Cytochrome c oxidase subunit 7C, mitochondrial	D6R9Z7;P15954	3	1	5	Both		2					3			2	1	2		1
TAF4	AHAQPQTTM;YEQASDVRA	Transcription initiation factor TFIID subunit 4;Transcription initiation factor TFIID subunit 4 (Fragment)	A0A0G2JRY5;O00268	2	0	2	Cancer							2					1
EIF4A1;EIF4A2;EIF4A3	AEAPHIVV;ARDFTVSAL;ATMPSDVLEVTKK;ATMPTDVLEVTKK;EEDMTKVEF;EELTLEGIRQF;EEMPLNVADLI;EEVDVTPTF;FAISILQQL;IEFKETQAL;IEFKETQALVL;IELDLKATQAL;IELDLKATQALVL;IEQYYSTQI;IETFYNTSI;IETFYNTTV;IGGTNVRAEVQ;IYDIFQKL;KTATFAISI;LPNNRELYI;LTLEGIRQF;MPLNVADLI;MPMNVADLI;MPQKERESI;MPQKERESIM;MPSDVLEVT;MPTDVLEVT;NTSIEEMPLNVADLI;RTLRDIETF;RTLRDIETFY;RYLSPKYIKMF;SESLLRGIYAY;VIFLNTRRK;VRAEVQKL;YGFEKPSAI	Eukaryotic initiation factor 4A-I;Eukaryotic initiation factor 4A-I (Fragment);Eukaryotic initiation factor 4A-II;Eukaryotic initiation factor 4A-II (Fragment);Eukaryotic initiation factor 4A-III	E7EMV8;E7EQG2;E9PBH4;F8WE11;I3L3H2;J3KS25;J3KS93;J3KSN7;J3KSZ0;J3KT04;J3KT12;J3KTB5;J3KTN0;J3QKZ9;J3QL43;J3QLN6;J3QQP0;J3QR64;J3QS69;P38919;P60842;Q14240	35	4	8	Both			1	2	1	6	1	6	10		1	6	4	10	6
SLC35D2	YGFPSPIFL	UDP-N-acetylglucosamine/UDP-glucose/GDP-mannose transporter	Q5VZJ2;Q76EJ3	1	0	2	Cancer							1					1
TBC1D20	YHDIVVTFL	TBC1 domain family member 20	Q96BZ9	1	0	1	Cancer							1
ATP6V0E1	YHGLTVPLI	V-type proton ATPase subunit e 1	E5RHL5;J3KN48;O15342	1	0	2	Cancer							1					1
UGT1A1;UGT1A10;UGT1A3;UGT1A4;UGT1A5;UGT1A6;UGT1A7;UGT1A8;UGT1A9;UGT2A1;UGT2B10;UGT2B11;UGT2B28;UGT2B7	DPLYKENIM;KYLSIPAVF;KYLSIPAVFF;KYLSIPTVF;KYLSIPTVFF;YHSLDVIGF	UDP-glucuronosyltransferase;UDP-glucuronosyltransferase 1-1;UDP-glucuronosyltransferase 1-10;UDP-glucuronosyltransferase 1-3;UDP-glucuronosyltransferase 1-4;UDP-glucuronosyltransferase 1-5;UDP-glucuronosyltransferase 1-6;UDP-glucuronosyltransferase 1-7;UDP-glucuronosyltransferase 1-8;UDP-glucuronosyltransferase 1-9;UDP-glucuronosyltransferase 2A1;UDP-glucuronosyltransferase 2B10;UDP-glucuronosylt…	A0A140T9Z0;D6RFW5;O60656;O75310;P16662;P19224;P22309;P22310;P35503;P35504;P36537;Q9BY64;Q9HAW7;Q9HAW8;Q9HAW9;Q9Y4X1	6	1	4	Both						1	1					5		2	1
CLK1	YIDEYRNDY	Dual specificity protein kinase CLK1;Dual-specificity protein kinase CLK1	F8WBF5;A0A087WVK0;P49759	1	0	2	Cancer							1							1
GFOD2	YIVDLLTHL	Glucose-fructose oxidoreductase domain-containing protein 2	Q3B7J2	1	0	1	Cancer							1
PRXL2B	YLDESKQLY	Prostamide/prostaglandin F synthase;Prostamide/prostaglandin F synthase (Fragment);Peroxiredoxin-like 2B;Peroxiredoxin-like 2B (Fragment)	J3QKK8;A0A0G2JSF1;A0A2P0CTH9;J3KRV9;A0A2P0CU24;A0A0A0MRV4;A0A0G2JRR6;J3KPF6;A0A2P0CTB1;J3KPF5;A0A0A0MT35;Q8TBF2	1	0	2	Cancer							1							1
TRMT6	YLDNVIGHSY	tRNA (adenine(58)-N(1))-methyltransferase non-catalytic subunit TRM6	Q9UJA5	1	1	1	Both					1		1
SERPINA11	YLDSIKELY	Serpin A11	Q86U17	1	0	2	Cancer							1							1
AS3MT	YLDYHMEKY	Arsenite methyltransferase	A0A087WVD4;Q9HBK9	1	0	4	Cancer							1						1	1	1
PPP4R1L	YLIPIVVRY	Putative serine/threonine-protein phosphatase 4 regulatory subunit 1-like	Q9P1A2	1	0	2	Cancer							1					1
LTBP4	YSDASGFGY	Latent-transforming growth factor beta-binding protein 4	A0A0C4DH07;Q8N2S1	1	1	1	Both					1		1
CTNND2	YSELNYETSHY	Catenin delta-2;cDNA FLJ56233, highly similar to Catenin delta-2	D6R9A8;B4DRK2;E7EPC8;Q9UQB3	1	0	1	Cancer							1
HSP90AA1;HSP90AA2P;HSP90AB1;HSP90AB2P;HSP90AB4P	AEDKENYKKF;DEMTSLSEY;DEMVSLKDY;DILEKKVEK;FTELAEDKENY;ILEKKVEKV;IPNPQERTLTL;KESEDKPEI;KIMKDILEK;KIMKDILEKK;KTKKIKEKY;NPDDITNEEY;NPDDITQEEY;NPQERTLTL;NYKKFYEAF;NYKKFYEQF;SIIETLRQK;STMGYMAAK;TEYLEERRI;YSNKEIFL	Heat shock protein HSP 90-alpha;Heat shock protein HSP 90-alpha (Fragment);Heat shock protein HSP 90-alpha A2;Heat shock protein HSP 90-beta;Putative heat shock protein HSP 90-beta 2;Putative heat shock protein HSP 90-beta 4	G3V2J8;H0YJF5;P07900;P08238;Q14568;Q58FF6;Q58FF8	20	3	9	Both	+		2		1	2	1	6	4	1	2	3	1	5	7
PARD6A	YTDAHGDLL	Partitioning defective 6 homolog alpha	Q9NPB6	1	0	2	Cancer							1							1
PIM1;PIM2;PIM3	DEEIIRGQVF;EEIIRGQVF;GELPNGTRV;HPWMQDVLL;HSLSPGPSK;IADGLPVAV;RPDSFVLIL;RVYSPPEWISR;SECQHLIRW;YTDFDGTRVY	Serine/threonine-protein kinase pim-1;Serine/threonine-protein kinase pim-2;Serine/threonine-protein kinase pim-2 (Fragment);Serine/threonine-protein kinase pim-3	C9J8V9;P11309;Q86V86;Q9P1W9	10	1	7	Both					1		1	3	3			2	1	2	2
TSPAN4	YTDKIDRY	Tetraspanin-4;Tetraspanin;Tetraspanin-4 (Fragment);Tetraspanin (Fragment)	E9PSH3;E9PN41;E9PPX8;A8MVV6;J3KQ42;O14817	1	1	4	Both					1		1						1	1	1
DCLK1	YTERDASGMLY	Serine/threonine-protein kinase DCLK1	O15075	1	0	2	Cancer							1							1
EPHA10	AEALTLGQFD	Ephrin type-A receptor 10;Ephrin type-A receptor 10 (Fragment);EPH receptor A10, isoform CRA_b	H0YCC9;J3KQG3;Q5JZY3	1	0	1	Cancer								1
YWHAE;YWHAG;YWHAH	AFDDAIAEL;FQYESKVFY;QYESKVFYL;RYDDMASAM;RYDEMVESM;SAMKAVTEL;SEAAYKEAF;VEERNLLSV	14-3-3 protein epsilon;14-3-3 protein epsilon (Fragment);14-3-3 protein eta;14-3-3 protein eta (Fragment);14-3-3 protein gamma	A2IDB1;A2IDB2;B4DJF2;F8WEB6;I3L3T1;K7EIT4;K7EM20;P61981;P62258;Q04917	8	2	8	Both		1				3	1	3	1	1	2	2		5	3
MYOM2	AFDEAFAEF;EIFDGKDNHQR	Myomesin-2	A0A0J9YVV7;E7EWH9;P54296	2	1	3	Both		1						1						1	1
YWHAB;YWHAQ;YWHAZ	AFDEAIAEL;AFDISKKEM;LIKDYREK;NPESKVFYL;RYDDMATCM;VESELRSI;YEILNNPEL	14-3-3 protein beta/alpha;14-3-3 protein theta;14-3-3 protein theta (Fragment);14-3-3 protein zeta/delta;14-3-3 protein zeta/delta (Fragment)	B0AZS6;B7Z2E6;E7EX29;E9PG15;H0YB80;P27348;P31946;P63104	7	1	7	Both						4		3	1		1	2	1	4	3
NAA40	AFDLTKTNM	N-alpha-acetyltransferase 40	Q86UY6	1	1	3	Both						1		1						1	1
SYTL4	AGDFGNIFV	Synaptotagmin-like protein 4	Q96C24	1	0	2	Cancer								1						1
CAPN8	AITSQKLVK	Calpain-8;Calpain-8 (Fragment)	H0YEJ4;B1B154;B1B153;A6NHC0	1	0	1	Cancer								1
FGFR3	ALALCVAVAI	Fibroblast growth factor receptor 3;Fibroblast growth factor receptor	I6LM06;F8W9L4;P22607	1	0	1	Cancer	+							1
PCDH19	ALAPPARDL	Protocadherin-19	Q8TAB3	1	0	1	Cancer								1
TMEM238	ALARLARKL	Transmembrane protein 238	C9JI98	1	0	1	Cancer								1
MSX2;MSX1	ALERKFRQK	Homeobox protein MSX-2;Homeobox protein MSX-1	P35548;P28360	1	0	2	Cancer								1							1
STS	ALFSSKDFAGK	Steryl-sulfatase	P08842	1	0	1	Cancer								1
ESD	ALKNPGKYK;ATEDPWKTNY	S-formylglutathione hydrolase;S-formylglutathione hydrolase (Fragment)	H7BZT7;P10768;U3KQT1;X6RA14	2	1	5	Both					1		1	1					1	1	1
ARPC5	ALKNPPINTK	Actin-related protein 2/3 complex subunit 5	B1ALC0;O15511	1	0	2	Cancer								1							1
TRIR	ALKTGIVAK	Telomerase RNA component interacting RNase	Q9BQ61	1	0	2	Cancer								1							1
GRK5;GRK6	ALNEKQILEK;DYLDSIYFNRF;VHVPEGQTI	G protein-coupled receptor kinase;G protein-coupled receptor kinase (Fragment);G protein-coupled receptor kinase 5;G protein-coupled receptor kinase 6	D6RHC7;D6RHX8;F8W9W2;P34947;P43250	3	1	4	Both						1	1	1				1			1
CDC42BPA	ALDGRETDFY;ALNKEIMILK	Non-specific serine/threonine protein kinase;Serine/threonine-protein kinase MRCK alpha;Serine/threonine-protein kinase MRCK alpha (Fragment)	A0A0A0MRJ0;A0A0A0MRJ1;H0Y5V1;H0Y6R0;H0Y6V3;H0Y7V8;Q5VT25	2	0	4	Cancer							1	1					1	1
RBFA	ALNKQIMEY	Putative ribosome-binding factor A, mitochondrial	Q8N0V3	1	0	1	Cancer								1
B3GLCT	ALSIPLVNK	Beta-1,3-glucosyltransferase	Q6Y288	1	0	1	Cancer								1
GTF2E2	ALSTPVVEK	Transcription initiation factor IIE subunit beta;Transcription initiation factor IIE subunit beta (Fragment)	E5RIW4;E5RH41;P29084;E5RK24	1	1	2	Both				1				1							1
SPRYD7	ALYHNNEEK	SPRY domain-containing protein 7	Q5W111	1	0	1	Cancer								1
SLX4	ALYQKVLLY	Structure-specific endonuclease subunit SLX4	Q8IY92	1	0	2	Cancer								1							1
MUL1	ALYSVYRQK;FTDVIGHY	Mitochondrial ubiquitin ligase activator of NFKB 1	Q969V5	2	0	3	Cancer							1	1							1
PKLR;PKM	AMADTFLEH;ESFASDPIL;EVENGGSL;FASDPILYRPVAVA;FSHGTHEYHAE;GFTNTMRVVPVP;MLSGETAKGDYPLEAV;NVRTATESF;RNPQTARQA;RYRPRAPII;SGFTNTMRVVPVP;SKPHSEAGTA;SKPHSEAGTAF;SKPHSEAGTAFIQ;SKPHSEAGTAFIQTQ;SKPHSEAGTAFIQTQQLH;SKPHSEAGTAFIQTQQLHAAM;SKPHSEAGTAFIQTQQLHAAMADT;SKPHSEAGTAFIQTQQLHAAMADTF;TESFASDPILYRPVAVA;TESFASDPILYRPVAVAL;THEYHAETI;YHLQLFEEL;YVDDGLISL	Pyruvate kinase;Pyruvate kinase (Fragment);Pyruvate kinase PKLR;Pyruvate kinase PKM;Pyruvate kinase PKM (Fragment)	B4DNK4;H3BN34;H3BQ34;H3BQZ3;H3BR70;H3BT25;H3BTJ2;H3BTN5;H3BU13;H3BUW1;P14618;P30613	24	4	7	Both		5	3		1	2	7	7	5	3		6		9	2
NDUFA10	AMYNQGFIRK	NADH dehydrogenase [ubiquinone] 1 alpha subcomplex subunit 10, mitochondrial;NADH dehydrogenase (Ubiquinone) 1 alpha subcomplex, 10, 42kDa, isoform CRA_c;NADH dehydrogenase [ubiquinone] 1 alpha subcomplex subunit 10, mitochondrial (Fragment)	Q8N1B9;C9J6X0;A0A087WXC5;E7ESZ7;O95299	1	0	1	Cancer								1
HSPA4;HSPH1	AELLQKIEV;APFSKVLTF;AVALNYGIYK;AVKEKISKF;AVKERIAKF;DAAQIVGLN;DEVLVNHF;DIKSKIRAL;EELGKQIQQY;EIKTKIKEL;FVDMGHSAY;GEDQAKQAY;GIETIANEF;HAAPFSKVL;IETIANEF;KFFGKDISTTL;LTETEDWLY;NADEAVTR;NASDLPLSI;QYMKIISSF;SEAGTQPQV;THANNTVSNF;VEEYVYEF;VPTEENEM	Heat shock 70 kDa protein 4;Heat shock protein 105 kDa;Heat shock protein 105 kDa (Fragment)	A0A087WTS8;A0A087WYC1;A0A0A0MSM0;P34932;Q5TBM3;Q92598;R4GN69	24	3	8	Both		1	2			2	2	7		1	4	8	2	5	2
CDC6	AQATISFPK	Cell division control protein 6 homolog;Cell division control protein 6 homolog (Fragment)	J3KTI7;J3QR52;J3QLN7;Q99741	1	0	3	Cancer								1	1						1
BPNT1	ASAYSIAQK	3'(2'),5'-bisphosphate nucleotidase 1;3'(2'),5'-bisphosphate nucleotidase 1 (Fragment)	F8VVW8;F8VZG4;F8W1J0;A6NF51;O95861	1	0	2	Cancer								1							1
RIMBP3;RIMBP3B;RIMBP3C	ASPGVLVVSW;TAGSTLLEF	RIMS-binding protein 3A;RIMS-binding protein 3B;RIMS-binding protein 3C	A6NJZ7;A6NNM3;J3KP16;Q9UFD9	2	0	1	Cancer								2
ZNF830	ASSASARTPAGK	Zinc finger protein 830	Q96NB3	1	0	1	Cancer								1
CNTNAP3B;CNTNAP3;CNTNAP3C	ASVAWAVLK	Contactin-associated protein-like 3B;Contactin-associated protein-like 3;Contactin-associated protein-like 3C (Fragment)	A0A2P0CT92;A0A1B0GTE1;F2Z2X6;F2Z2X5;A0A087WUG9;B1AM99;A0A087WXL9;A0A087WZ03;A6NC89;A0A087X119;Q9BZ76;Q96NU0	1	0	1	Cancer															1
CFAP58	ATALKLSQD	Cilia- and flagella-associated protein 58	Q5T655	1	1	3	Both				1				1	1						1
RBFOX1;RBFOX2;RBFOX3	ATARVMTNK;YTADPYHAL	RNA binding protein fox-1 homolog;RNA binding protein fox-1 homolog 1;RNA binding protein fox-1 homolog 2;RNA binding protein fox-1 homolog 3;RNA-binding protein fox-1 homolog 1;RNA-binding protein fox-1 homolog 1 (Fragment);RNA-binding protein fox-1 homolog 2 (Fragment);RNA-binding protein fox-1 homolog 3 (Fragment)	A0A087X2B1;A0A0G2JRA5;A0A0G2JRD1;A0A286YEU2;A0A3B3ITL7;A6NFN3;B0QYV1;B0QYY4;B7Z1U7;F5H0M1;F8VR27;F8VRS4;F8VZG9;F8VZY7;J3KNW3;J3QQZ2;J3QRF4;O43251;Q9NWB1;S4R3K7;S4R469	2	0	2	Cancer								1	1
SLC25A17	ATFTVMGLK;KAIATTVTY	Peroxisomal membrane protein PMP34	B0QYW5;F6RTR7;F8WE74;O43808	2	0	3	Cancer							1	1				1
RGMB	ATNKITIIFK	RGM domain family member B	J3KNF6;Q6NW40	1	0	1	Cancer								1
LYZ	ATNYNAGDR	Lysozyme C;Lysozyme	F8VV32;A0A0B4J259;P61626	1	0	1	Cancer								1
IRX2;IRX5	ATRDATATLK;DALAKDPKM	Iroquois-class homeodomain protein IRX-2;Iroquois-class homeodomain protein IRX-5	H0YML8;P78411;Q9BZI1	2	0	2	Cancer								1						1
NUCKS1	ATVTPSPVK	Nuclear ubiquitous casein and cyclin-dependent kinase substrate 1	Q9H1E3	1	1	3	Both				1				1	1						1
DRGX	ATYAQALSH	Dorsal root ganglia homeobox protein	A6NNA5	1	0	1	Cancer								1
CEL	AVASAAKLG	Bile salt-activated lipase	X6R868;P19835	1	0	1	Cancer								1
HAGHL	AVAVDVAVPK	Hydroxyacylglutathione hydrolase-like protein;Hydroxyacylglutathione hydrolase-like protein (Fragment)	H3BN70;I3L3H5;H3BQ57;H3BT20;B4DED4;Q6PII5	1	0	1	Cancer								1
TNFAIP8L1	AVGPHLTAK	Tumor necrosis factor alpha-induced protein 8-like protein 1	Q8WVP5	1	1	3	Both				1				1	1						1
NME6	AVHQQILSNK	Nucleoside diphosphate kinase 6;Nucleoside diphosphate kinase 6 (Fragment);Nucleoside diphosphate kinase (Fragment);Nucleoside diphosphate kinase	C9J867;F2Z2J2;C9J1J2;C9J9V6;A0A0C4DG91;O75414	1	0	2	Cancer								1							1
CRYM	AVMDGNVITAK	Ketimine reductase mu-crystallin;Ketimine reductase mu-crystallin (Fragment)	I3NI53;I3L2W5;I3L325;Q14894	1	0	1	Cancer								1
CD99	AVQRTLLEK	CD99 antigen	A0A096LP69;P14209	1	1	3	Both				1				1	1						1
TSC22D1;TSC22D2;TSC22D4	AVREEVEVLK;ISSSAAVSSV;KELIEKNSQL;QENNLLKTL;SEYLQQHVA	TSC22 domain family protein 1;TSC22 domain family protein 2;TSC22 domain family protein 2 (Fragment);TSC22 domain family protein 4;TSC22 domain family protein 4 (Fragment)	A0A087X0H8;H0Y865;H7BZ77;O75157;Q15714;Q9Y3Q8	5	0	5	Cancer							1	1	2		1	1
NR1D1;NR1D2	AVRFGRIPK;FPCSESQQHL	NR1D2 protein;Nuclear receptor subfamily 1 group D member 1;Nuclear receptor subfamily 1 group D member 2	P20393;Q14995;Q6NSM0	2	0	2	Cancer								1						1
BCL2L15	AVSVKLLEY	Bcl-2-like protein 15	Q5TBC7	1	0	1	Cancer								1
TOLLIP	AVYETPTAH	Toll-interacting protein;Toll interacting protein, isoform CRA_b;Toll-interacting protein (Fragment)	E9PP67;E9PQ25;E7EN89;Q9H0E2	1	1	3	Both				1				1	1						1
KCNN1	DALGASLQAL	Small conductance calcium-activated potassium channel protein 1	A0A087X2E7;Q92952	1	0	1	Cancer								1
LY96	DASISYTY	Lymphocyte antigen 96	Q9Y6Y9	1	0	2	Cancer								1							1
STEAP1;STEAP1B	DAWIEHDVW	Metalloreductase STEAP1;STEAP family member 1B;STEAP family member 1B (Fragment);Metalloreductase STEAP1 (Fragment)	H7C0D8;C9JL51;C9JE84;Q6NZ63;Q9UHE8	1	0	1	Cancer								1
SPIN1;SPIN2A;SPIN2B;SPIN3	AEREPGEVV;DDFHIYVY;HLADTMIGK;VVDSLVGKQVEY	Spindlin-1;Spindlin-2A;Spindlin-2B;Spindlin-3	A0A087X074;A0A1W2PR54;Q5JUX0;Q5JZB7;Q99865;Q9BPZ2;Q9Y657	4	2	3	Both					1	1		2				1			1
TTC22	ALYDKALGY;DEAALNQALVF;YLDIGQVYY	Tetratricopeptide repeat protein 22	Q5TAA0	3	0	4	Cancer							1	2						1	1
ARHGEF38	DEAHSILESY	Rho guanine nucleotide exchange factor 38	Q9NXL2	1	0	1	Cancer								1
ARL11	DEARLPESA	ADP-ribosylation factor-like protein 11	Q969Q4	1	0	1	Cancer								1
IGFBP3	DEARPLQAL	Insulin-like growth factor-binding protein 3;Insulin-like growth factor binding protein 3 isoform b	A6XND1;A6XND0;P17936	1	0	1	Cancer								1
LPGAT1	DEAVMLVNH	Acyl-CoA:lysophosphatidylglycerol acyltransferase 1	Q92604	1	0	1	Cancer								1
NEDD4L	DEENFGQTY	E3 ubiquitin-protein ligase NEDD4-like;E3 ubiquitin-protein ligase NEDD4-like (Fragment)	K7ERN1;A0A1B0GVY1;Q96PU5	1	0	1	Cancer								1
AIF1L	DEENLPEKL	Allograft inflammatory factor 1-like	Q5JUP3;Q9BQI0	1	0	1	Cancer								1
NFIA;NFIB;NFIC;NFIX	DEFHPFIEA;DVFYPGTGR;EAASPTATTYTASGTSQ;GPPVSSKPG;LSDLESSSY;LSDLESSSYY;SPYFTHPTI	Nuclear factor 1;Nuclear factor 1 (Fragment);Nuclear factor 1 A-type;Nuclear factor 1 A-type (Fragment);Nuclear factor 1 B-type;Nuclear factor 1 B-type (Fragment);Nuclear factor 1 C-type;Nuclear factor 1 X-type;Nuclear factor 1 X-type (Fragment)	A0A087WXP2;A0A0A0MRX8;A0A1B0GTC1;A0A1B0GU97;A0A1B0GVN4;A0A1B0GW37;A0A1B0GWI9;A0A1B0GWJ4;A0A286YEX4;A0A2R8Y7V8;B1AKN5;B1AKN6;B1AKN7;B1AKN8;C9JWJ8;K7EJB0;K7EN08;O00712;P08651;Q12857;Q14938;Q5VW26;Q5VW27;Q5VW30;Q5W0Y9;S4R3W2;U3KPY9;U3KQE8	7	2	6	Both		1		1			2	1				1	1	2	1
ATG10	DEFIGEKTF	Ubiquitin-like-conjugating enzyme ATG10;Ubiquitin-like-conjugating enzyme ATG10 (Fragment)	D6RC89;D6RBD1;D6RDX3;Q9H0Y0	1	0	1	Cancer								1
GALNT1	DEFKNFFY	Polypeptide N-acetylgalactosaminyltransferase 1	K7EJV8;Q10472	1	0	1	Cancer								1
PNMA5	DEFLSRLNY	Paraneoplastic antigen-like protein 5	Q96PV4	1	0	1	Cancer								1
PRKCE	DEFNFIKV;DEFNFIKVL	Protein kinase C epsilon type	E9PBI2;Q02156	2	0	1	Cancer								2
LOX;LOXL1	DEFSHYDL;IRYTGHHAY;YPDPGPEAAQAHGGDPRL	Lysyl oxidase homolog 1;Protein-lysine 6-oxidase	H3BUV8;P28300;Q08397	3	0	3	Cancer								1				1		1
MID1	DEFSVVSY	E3 ubiquitin-protein ligase Midline-1;E3 ubiquitin-protein ligase Midline-1 (Fragment)	C9J453;A0A087X255;O15344	1	0	1	Cancer								1
VPS72	DEFYQTTY	Vacuolar protein sorting-associated protein 72 homolog	A0A1W2PPT2;Q15906	1	0	1	Cancer								1
GSPT1;GSPT2	DEGKTIAI;EPIVENGETEM;IAIGKVLKL;IVENGETEM;RAYFETEKK;SEAEPGGGSL	Eukaryotic peptide chain release factor GTP-binding subunit ERF3A;Eukaryotic peptide chain release factor GTP-binding subunit ERF3A (Fragment);Eukaryotic peptide chain release factor GTP-binding subunit ERF3B	H3BMT9;H3BR35;H3BSV8;P15170;Q8IYD1	6	1	5	Both						1	1	2	1			1		2
RAP1GAP2	DEHEVNNTF	Rap1 GTPase-activating protein 2	A0A1B0GV05;Q684P5	1	0	1	Cancer								1
RFC4	DEHLQLISL	Replication factor C subunit 4	C9JZI1;P35249	1	0	2	Cancer								1			1
SLC4A8;SLC4A7	DEIFHDVAY	Electroneutral sodium bicarbonate exchanger 1;Sodium bicarbonate cotransporter 3;Anion exchange protein (Fragment);Anion exchange protein	H7C3C4;C9JRP1;A0A0A0MST8;E9PFN4;Q2Y0W8;Q9Y6M7	1	0	1	Cancer								1
SPPL2B	DEIGIPVAL	Signal peptide peptidase-like 2B	A0A087WZ50;Q8TCT7	1	0	1	Cancer								1
SIRT1	DEIITNGF	NAD-dependent protein deacetylase sirtuin-1	Q96EB6	1	0	1	Cancer								1
GCDH	DEILIRDTF	Glutaryl-CoA dehydrogenase, mitochondrial;Glutaryl-CoA dehydrogenase, mitochondrial (Fragment)	K7ES74;K7EKH1;K7EKT3;K7ERX1;Q92947	1	0	1	Cancer								1
DCHS1	DEIRMINEF;REEGPPATA;SPSLSPLAA;YHAVVSESL	Protocadherin-16	Q96JQ0	4	0	4	Cancer							3	1		1		1
DNALI1	DEIRMTIAA;DEIRMTIAAY	Axonemal dynein light intermediate polypeptide 1	O14645	2	0	1	Cancer								2
F3	DEIVKDVKQTY	Tissue factor	P13726	1	0	1	Cancer								1
ARL8A	DEKELIEKM	ADP-ribosylation factor-like protein 8A	Q96BM9	1	0	1	Cancer								1
PFKM	DEKKFDEAL	ATP-dependent 6-phosphofructokinase, muscle type;ATP-dependent 6-phosphofructokinase;ATP-dependent 6-phosphofructokinase, muscle type (Fragment)	H0YHB8;F8VZI0;A0A2R8Y891;P08237	1	0	1	Cancer								1
RIPOR2;WASHC4	ALHSISVAK;AVDAARLHY;DEKLLQTM;EMRNLATQR;EVSEAVTLY;EVVTVFQYY;FAARPQVV;FIENSSAL;FLQQKAQSL;GEGLPTRLP;GLPTRLPEI;HGVSDLESY;HSISVAKKR;IEVELENLL;ILDRAEPLL;ITIVRHLQY;KEEDPEEPRKP;KEIEKDLRL;KSLQAIKI;KYLKEIRAV;LADPVFRTL;MKTFKDEEL;QEVLRTLAL;SEGNITKQL;SEIDQRDKY;SEMRNLATQRY;SSEVVTVFQYY;SSKTPFVAR;STVSADPVVK;SVVEAIPEF;SYLDQFRQL;TEAHLPSQTL;VFLPLIVGF;VVMNVVHQL;VYLQEFELL;YPGLADPVF	Rho family-interacting cell polarization regulator 2;Rho family-interacting cell polarization regulator 2 (Fragment);WASH complex subunit 4;WASH complex subunit 4 (Fragment)	A0A087X256;A0A2R8Y4B9;A0A2R8Y7B3;A0A2R8YEE0;A0A2R8YF77;B7Z6U4;F5GX51;F5H029;F8VQX3;F8VYH7;Q2M389;Q9Y4F9;R4GMM5	36	5	8	Both		3	3	1	2	4	8	3	6		3	7	2	5	6
CD200R1	DEKQITQNY	Cell surface glycoprotein CD200 receptor 1	Q8TD46	1	0	1	Cancer								1
ARL8B	DEKQLIEKM	ADP-ribosylation factor-like protein 8B	Q9NVJ2	1	0	1	Cancer								1
NEDD8;NEDD8-MDP1	DEKTAADY;VEEKEGIPP	NEDD8;NEDD8-MDP1 readthrough;NEDD8-MDP1 readthrough (Fragment)	E9PL57;E9PS38;F8VSA6;Q15843;S4R3E9	2	0	2	Cancer							1	1
PLAT	DEKTQMIY	Tissue-type plasminogen activator;Tissue-type plasminogen activator (Fragment);Plasminogen activator	E5RHG4;E5RGA1;B4DNJ1;B4DN26;E7ESF4;P00750	1	0	1	Cancer								1
CLDND1	DEKTYNDAL	Claudin domain-containing protein 1;Claudin domain-containing protein 1 (Fragment)	D6RD48;D6RAZ7;D6RIU2;D6RDP6;H0Y8T9;D6RHU6;D6RDY1;D6RA76;D6RC11;D6R9S8;D6RCE6;D6RFX6;D6RDI6;D6RCR8;A0A0R4J2F2;Q9NY35	1	0	1	Cancer								1
FZD6	DELEFAKSF	Frizzled-6;Frizzled homolog 6 (Drosophila), isoform CRA_b	G5EA13;O60353	1	0	1	Cancer	+							1
ATIC	DELGIILAH	Bifunctional purine biosynthesis protein PURH	P31939	1	0	1	Cancer								1
DNMBP	DELPKFHQY;EHSRVLQQL	Dynamin-binding protein	A0A1B0GTX1;A0A1C7CYY6;Q6XZF7	2	0	3	Cancer							1	1				1
AGO3;AGO4	DELQLLTY;EVIQDLTNM;RTLPEPLEL;SMDGHPSRY;VPDDSVQAL	Eukaryotic translation initiation factor 2C, 3, isoform CRA_a;Protein argonaute-3;Protein argonaute-4	Q5TA56;Q9H9G7;Q9HCK5	5	0	5	Cancer							1	1				1	1	2
PDXDC1;PDXDC2P	DELSSPVVVF;FKIGPEYKS;HANDDKSSL;IESKLPVL;NELESDLTF;QHQMDVAFL;SETSSVSHI;VVDGFNVLY	LP8165;PDXDC1 protein;Putative pyridoxal-dependent decarboxylase domain-containing protein 2;Pyridoxal-dependent decarboxylase domain-containing protein 1;Pyridoxal-dependent decarboxylase domain-containing protein 1 (Fragment)	H3BND4;H3BNL6;J3KNK7;Q6P474;Q6P996;Q6XYB5;Q86XE2	8	2	4	Both		1			1		1	3				3		2
SIRT2	DELTLEGVARY	NAD-dependent protein deacetylase sirtuin-2;NAD-dependent protein deacetylase sirtuin-2 (Fragment);NAD-dependent protein deacetylase	F8WF57;F8WDM4;C9JR33;C9J3U7;F8WCF4;C9JZQ0;B5MCS1;A0A0A0MRF5;E7EWX6;A0A087WYM3;Q8IXJ6	1	0	1	Cancer								1
ZNF331	DELTQHQRF	Zinc finger protein 331	Q9NQX6	1	0	1	Cancer								1
LCMT1	DEDLLPSKY;DEMELLEQL	Leucine carboxyl methyltransferase 1;Leucine carboxyl methyltransferase 1 (Fragment)	I3L2Q8;Q9UIC8	2	0	1	Cancer								2
PPP1R2;PPP1R2P1	DEMNILATY;HPADKDYGL;HPADKDYGLM	Protein phosphatase inhibitor 2;Protein phosphatase inhibitor 2 (Fragment);Putative protein phosphatase inhibitor 2-like protein 1	E7EMN6;E7EUI7;H7C416;P41236;Q96PQ5	3	1	4	Both						2		1		1	1			2
ANGPTL4	DEMNVLAH	Angiopoietin-related protein 4;Angiopoietin-related protein 4 (Fragment)	M0R0N8;M0QZ51;M0R3A2;M0R369;M0R2X8;Q9BY76	1	0	1	Cancer								1
ZNF768	DEMRSPEGY	Zinc finger protein 768	Q9H5H4	1	0	2	Cancer								1			1
NKTR;PPIA;PPIE	DENFILKH;EVIEQIENL;GEVTEGLDVL;ITDIQIPLDY;VDGEPLGRVS;VDGEPLGRVSFE	NK-tumor recognition protein;Peptidyl-prolyl cis-trans isomerase;Peptidyl-prolyl cis-trans isomerase (Fragment);Peptidyl-prolyl cis-trans isomerase A;Peptidyl-prolyl cis-trans isomerase E	C9J5S7;E5RIZ5;E9PEQ6;E9PK21;E9PKY5;F8WE65;P30414;P62937;Q9UNP9	6	2	5	Both		1			1		1	2	2	1		1
PSMG3	DEPLIHVF	Proteasome assembly chaperone 3	Q9BT73	1	0	1	Cancer								1
LSM3	DERIYVKM	U6 snRNA-associated Sm-like protein LSm3	P62310	1	0	1	Cancer								1
NPHP1	DESAPVANY	Nephrocystin-1	C9J082;C9JNM7;O15259	1	0	1	Cancer								1
NUPR1	DESDLYSLAHSY;ESDLYSLAHSY	Nuclear protein 1	H3BS92;O60356	2	1	3	Both					1		1	1						1
OLFM1;OLFM2	DESGLWAVY;RSRSVLVQR;YTDVPFHNQY	Noelin;Noelin-2;Noelin-2 (Fragment)	K7EIS8;K7EKW2;O95897;Q99784	3	2	5	Both					1	1	1	1					1	1	1
FAM214A	DESSVSISH	Protein FAM214A;Protein FAM214A (Fragment)	H0Y3Q9;Q32MH5	1	0	1	Cancer								1
PPP4R4	DESVSIHAY	Serine/threonine-protein phosphatase 4 regulatory subunit 4;Serine/threonine-protein phosphatase 4 regulatory subunit 4 (Fragment)	G3V422;G3V431;Q6NUP7	1	0	1	Cancer								1
KCTD17;KCTD2;KCTD5	DETGAYLI;KTKSTEEQL;YFLTTRQTL	BTB/POZ domain-containing protein KCTD17;BTB/POZ domain-containing protein KCTD17 (Fragment);BTB/POZ domain-containing protein KCTD2;BTB/POZ domain-containing protein KCTD5	A0A087WX35;B0QYB2;H0Y731;H3BSS5;H7C323;Q14681;Q8N5Z5;Q9NXV2	3	0	3	Cancer								1				1		1
PLA2G4A	DETLGTATF	Cytosolic phospholipase A2	P47712	1	0	1	Cancer								1
CTDSP1;CTDSP2;CTDSPL	AYKEEANTI;DETLVHSSF;IPVEIDGVVHQVY;YADPVADLL	Carboxy-terminal domain RNA polymerase II polypeptide A small phosphatase 1;Carboxy-terminal domain RNA polymerase II polypeptide A small phosphatase 1 (Fragment);Carboxy-terminal domain RNA polymerase II polypeptide A small phosphatase 2;Carboxy-terminal domain RNA polymerase II polypeptide A small phosphatase 2 (Fragment);CTD small phosphatase-like protein;CTD small phosphatase-like protein (Fr…	F8VYL0;H0YI12;H7C1Z7;H7C270;H7C2B9;H7C2S4;H7C3E0;O14595;O15194;Q9GZU7	4	0	5	Cancer								1		1	1			2	1
NIFK	DETQIFSY;DETQIFSYF	MKI67 FHA domain-interacting nucleolar phosphoprotein	Q9BYG3	2	0	1	Cancer								2
ZNF532	DETSLATHF	Zinc finger protein 532;Zinc finger protein 532 (Fragment)	K7EN67;K7ELQ2;K7EIU3;Q9HCE3	1	0	2	Cancer								1			1
SLC4A4	DEVFHDIAY	Electrogenic sodium bicarbonate cotransporter 1	Q9Y6R1	1	0	1	Cancer								1
PDZD2	DEVIARSTY	PDZ domain-containing protein 2	O15018	1	0	1	Cancer								1
FAH	DEVIITGY	Fumarylacetoacetase	P16930	1	0	1	Cancer								1
RNF208	DEVIVNQY	RING finger protein 208	Q9H0X6	1	0	1	Cancer								1
COMMD1	DEVKVNQI	COMM domain-containing protein 1;COMM domain-containing protein 1 (Fragment)	H7C377;H0Y7J4;Q8N668	1	0	1	Cancer								1
SBDS	DEVLQTHSV;DEVLQTHSVF	Ribosome maturation protein SBDS	A0A087X020;F8WE72;Q9Y3A5	2	0	2	Cancer								2		1
OCLN	DEYNRLKQV;TSDQQRQLY;YVDQYLYHY	Occludin	A0A0G2JMZ8;Q16625	3	1	5	Both					2		2	1					1	1	1
MRPL49	DEYQFVERL	39S ribosomal protein L49, mitochondrial	E9PI78;E9PNF1;Q13405	1	0	3	Cancer								1		1	1
C1orf54	DEYYQVVYY	Uncharacterized protein C1orf54;Chromosome 1 open reading frame 54	Q5TB16;Q8WWF1	1	0	1	Cancer								1
ELP5	DFFRDPLNW	Elongator complex protein 5;Elongator complex protein 5 (Fragment)	I3L1A8;I3L200;I3L2A9;I3L2T0;I3L3N8;I3L437;I3L1Q3;Q8TE02	1	0	1	Cancer								1
UIMC1	DIKSSETGAFR;TTSSVSVKR	BRCA1-A complex subunit RAP80;BRCA1-A complex subunit RAP80 (Fragment)	D6RC40;D6RCQ3;D6RDZ5;Q96RL1	2	1	1	Both		1						1
KATNAL1	DIQLEDIAEKI	Katanin p60 ATPase-containing subunit A-like 1	Q9BW62	1	0	1	Cancer								1
IGKV2-29;IGKV2-40;IGKV2D-29;IGKV2D-40	DIVMTQTPLSL;DIVMTQTPLSLPVTPG;DIVMTQTPLSLPVTPGE;DIVMTQTPLSLPVTPGEPA;DIVMTQTPLSLSVTPG;EDIVMTQTPLSL;EDIVMTQTPLSLPVTP;EDIVMTQTPLSLPVTPG;EDIVMTQTPLSLPVTPGE;EDIVMTQTPLSLPVTPGEPA	Immunoglobulin kappa variable 2-29;Immunoglobulin kappa variable 2-40;Immunoglobulin kappa variable 2D-29;Immunoglobulin kappa variable 2D-40	A0A075B6S2;A0A087WW87;A0A087X0Q4;A2NJV5;P01614	10	3	4	Both				2	1	3	1	10				1	1
MAP3K12	DLKETDIKHLR	Mitogen-activated protein kinase kinase kinase 12	F8VUG4;Q12852	1	0	1	Cancer								1
MRTFA;MRTFB	AEVVVATV;APSPQSEAVAHEF;AVQQPFINK;DLNEKIAQR;GLAAGGIVAV;IPAREGEAI;PVSIQGSSV;RQKQQLVER;SLFGSPVAK;TPVKQENSF	Mkl1 variant 1 Mkl1_S;Myocardin-related transcription factor A;Myocardin-related transcription factor A (Fragment);Myocardin-related transcription factor B;Myocardin-related transcription factor B (Fragment);Phosphatase and actin regulator	A0A087WU73;A0A087WVL2;A0A087X287;A0A494BZX7;A0A494C1G6;B0QY83;B0QY84;E7ER32;I3L0U1;I3L2S3;I3L3Z7;Q969V6;Q9ULH7;W0Z7M9	10	3	8	Both		1	1			1	1	4	1	1	1	2		2	3
CBLL1	DLQAHINHR	E3 ubiquitin-protein ligase Hakai;E3 ubiquitin-protein ligase Hakai (Fragment)	C9J2P9;Q75N03	1	0	1	Cancer								1
SLC9A3	DLQIGLLDF	Sodium/hydrogen exchanger 3;Sodium/hydrogen exchanger	A0A2R8Y780;P48764	1	0	2	Cancer								1	1
ID1	DEQQVNVL;DLQLELNS;GEISALTAEA	DNA-binding protein inhibitor ID-1	P41134	3	1	2	Both		1						2				1
FER1L5	DLQLLRQGDTAVY	Fer-1-like protein 5	A0A286YFD8;A0A286YEQ6;A0A286YFD1;A0A286YFJ1;A0AVI2	1	1	3	Both				1				1				1	1
SEPT10;SEPT11;SEPT6;SEPTIN10;SEPTIN11;SEPTIN6	AATDIARQV;AEINGTMNA;DLREQTHTR;DPDSKPFSL;EMRQMFVQR;ESLPDQLVNR;FIAPTGHSL;FIDAQFEAY;GETGLGKSTL;GSQAGGSQTLK;LPFAVIGSTEEL;QESNVRLKL;RVKEKEAEL;SEIFHSQSF;THNEPGVRL;THTQPGVQL	Septin 10;Septin 10 (Fragment);Septin 11;Septin 11 (Fragment);Septin 6;Septin-10;Septin-11;Septin-6	B1AMS2;B5ME97;C9JEW2;C9JNR7;D6R9Y6;D6RDP1;D6RDU5;D6RER5;D6RGI3;E7EW69;E7EX04;H0Y961;H0Y9G8;Q14141;Q9NVA2;Q9P0V9	16	3	8	Both		1			1	1	2	3	4	1	1	2		5	1
CD3E	DLYSGLNQR;FSELEQSGY	T-cell surface glycoprotein CD3 epsilon chain	E9PSH8;P07766	2	0	3	Cancer							1	1						1
TNS1;TNS2;TNS3	AESSPQTAA;AGDLANEL;DLGALLANS;DNQRKLFFR;EAVQRGLNSW;EPPPVSTVV;ESVPPGRSY;EYGKVEFVF;FLIECTPKGV;FLIETGPRGV;FLSHNFLTV;FPDYGKVEL;FPEYGKVEF;FYDDKVSAL;GEDPQGTLV;HAKVLEFGW;HEIPLRNGTL;HTQGPVDGSLY;HYPLNTVTF;IIDGRILSSK;IPFPNVLPDF;ISKATSETL;ISLEPALLL;ITIEPGLLL;LEDNGSTRV;MQLVYTSGVYHI;NASPLFLHF;PDHSDHTL;PDHSDHTLS;QEPPPVSTV;QHSIIPLAL;QHSITPLAL;QPAGAIVTF;REPKQPQPLL;SEAEPQLPP;SLYAKVRKK;SPDHSDHTL;TPIPSLPEF;TPNHVEHTL…	Tensin-1;Tensin-1 (Fragment);Tensin-2;Tensin-3;Tensin-3 (Fragment)	A0A087WWW7;A0A2R8Y4T1;A0A494C067;C9J8K5;C9JHU5;C9JI43;E7EMG1;E7ERH1;E9PCX8;E9PF55;E9PGF5;F8VV64;H0Y4U1;H7C3Z4;Q63HR2;Q68CZ2;Q9HBL0	44	5	9	Both		3	3	1	1	4	4	6	4	1	1	11	2	15	12
ERF;ETV3;ETV3L;LOC390937	DPDEVARLW;EEFRHVIAW;SSSSSSPFK;YPDPHSPFAV;YPFIDVGL	ETS domain-containing transcription factor ERF;ETS domain-containing transcription factor ERF (Fragment);ETS translocation variant 3;ETS translocation variant 3-like protein;Uncharacterized protein	A0A1W2PQ73;M0QX79;M0QXN0;P41162;P50548;Q6ZN32	5	0	4	Cancer								2			1			2	1
ERGIC2	DPINLSILF	Endoplasmic reticulum-Golgi intermediate compartment protein 2 (Fragment)	H0YI58	1	0	1	Cancer								1
BAG4	DSDLLDSQV	BAG family molecular chaperone regulator 4	O95429	1	0	1	Cancer								1
PLD1	DVARHFIQR	Phospholipase D1	Q13393	1	0	1	Cancer								1
GTF2I;GTF2IRD2;GTF2IRD2B	AEALGSTEA;AEDSTQHVP;AEFIKFTVI;ATLKWILENK;DLKQKVENL;DVFVVGTER;EGLPEGIPFRR;EGLPEGVPFRR;EPMEDSGISL;FLVDMTMHL;GEALGLKQA;HSEFTTLLY;IPDDDNERL;KAKGPVTI;KETDGSSQI;QVEEIFNLK;RGRAFVNTR;SESRMVVTF;TEPTEDSGISL;VEELFERKY;VPFALFESF;VTDADRSIL	General transcription factor II-I;General transcription factor II-I (Fragment);General transcription factor II-I repeat domain-containing protein 2A;General transcription factor II-I repeat domain-containing protein 2B	A0A087WW90;A0A0D9SF80;A0A494C0I1;A0A494C0Q7;A0A494C1K3;A0A494C1N8;C9J6M0;P78347;Q6EKJ0;Q86UP8	22	3	9	Both		3	2			1	3	6	3	1	1	2	1	5	4
TPRKB	DVKNAGDLR	EKC/KEOPS complex subunit TPRKB	Q9Y3C4	1	0	1	Cancer								1
COG3	DEHQLYNEF;DVQERLVYR	Conserved oligomeric Golgi complex subunit 3	Q96JB2	2	0	1	Cancer								2
RABL2B	DVQRKVTYR	Rab-like protein 2B	Q9UNT1	1	0	1	Cancer								1
FAM207A	DVRSVTSVR	Protein FAM207A;Protein FAM207A (Fragment)	C9JJU7;Q9NSI2	1	0	1	Cancer								1
UQCR11	DWVPYINGKFK;RELVKNWVP	Cytochrome b-c1 complex subunit 10	O14957	2	0	2	Cancer							1	1
ADAM19	DYLEFQKNR	Disintegrin and metalloproteinase domain-containing protein 19	E5RIS2;Q9H013	1	0	1	Cancer								1
AKT3	DYLHSGKIVYR;KTDGSFIGY	RAC-gamma serine/threonine-protein kinase;RAC-gamma serine/threonine-protein kinase (Fragment)	F8VS91;Q9Y243	2	0	3	Cancer	+						1	1						1
EPN3	DYLLKTGSER	Epsin-3;Epsin-3 (Fragment);EPN3 protein	D6RBR6;D6RFG3;D6REL6;I6L9I8;Q9H201	1	0	1	Cancer								1
AURKA;AURKB;AURKC	DYLPPEMIEGR;REVEIQSHL	Aurora kinase A;Aurora kinase A (Fragment);Aurora kinase B;Aurora kinase B (Fragment);Aurora kinase C;Aurora kinase C (Fragment)	A0A0A0MSY3;A3KFJ0;A3KFJ1;J3KT86;J3QLN8;M0QYK8;O14965;Q5QPD4;Q5Y191;Q96GD4;Q9UQB9	2	0	2	Cancer								1				1
CNNM3	DYRDTVVKR	Metal transporter CNNM3	Q8NE01	1	0	2	Cancer								1		1
GIMAP1	DYVSNTENR	GTPase IMAP family member 1	Q8WWP7	1	0	1	Cancer								1
IL1RN	DEGVMVTKF;EADQPVSL	Interleukin-1 receptor antagonist protein	P18510	2	0	1	Cancer								2
CD101	EAGGVTTNR;EVYDRNSLY	Immunoglobulin superfamily member 2	Q93033	2	0	2	Cancer							1	1
MSL1	EAHFLPRHR	Male-specific lethal 1 homolog	J3QQY0;J3KSZ8;Q68DK7	1	0	1	Cancer								1
APBB3	EAIGTLTAR	Amyloid-beta A4 precursor protein-binding family B member 3	O95704	1	0	1	Cancer								1
STK40	DTAILAQRY;EALHQKNIVHR	Serine/threonine-protein kinase 40	Q8N2I9	2	0	2	Cancer							1	1
PHYKPL;ETNPPL	EANDLALRL	5-phosphohydroxy-L-lysine phospho-lyase;Ethanolamine-phosphate phospho-lyase;Ethanolamine-phosphate phospho-lyase (Fragment);5-phosphohydroxy-L-lysine phospho-lyase (Fragment)	D6RGG2;D6RFL9;H0Y9N3;H7BXR0;E7ENR6;Q8IUZ5;Q8TBG4	1	0	1	Cancer								1
CLDN23	EAQPVLVAR	Claudin-23	Q96B33	1	0	1	Cancer								1
CENPL	EDFNIKVI	Centromere protein L	Q8N0S6	1	0	1	Cancer								1
SLC9A1	EDLPVITI	Sodium/hydrogen exchanger 1	P19634	1	0	1	Cancer								1
KBTBD8	EDTFIEKI	Kelch repeat and BTB domain-containing protein 8	Q8NFY9	1	0	1	Cancer								1
TRIB1;TRIB2	ADDAAAVAA;EEEAARLF;INQITEIIL;RSYGDMHSF;RVGPVRSAM;YPFHDSDPSALF	Tribbles homolog 1;Tribbles homolog 2	B5MCX4;E5RFH4;F8WA18;Q92519;Q96RU8	6	0	5	Cancer							1	2				2		2	1
FRMPD3	EEEEEEDETTS;EEEEEEEDETTS	FERM and PDZ domain-containing protein 3;FERM and PDZ domain-containing protein 3 (Fragment)	A0A0A0MSP7;Q5JV73	2	0	1	Cancer								2
MRPS9	EEEFVQRF	28S ribosomal protein S9, mitochondrial	P82933	1	0	1	Cancer								1
OTUD7A;OTUD7B	EEFHVFVL;REEQPTGPP	OTU domain containing 7B (Fragment);OTU domain-containing protein 7A;OTU domain-containing protein 7B	Q5SZ59;Q6GQQ9;Q8TE49	2	0	2	Cancer							1	1
CCDC6	EEFISNTLF	Coiled-coil domain-containing protein 6	Q16204	1	0	1	Cancer	+							1
STARD4	EEFNGYLY	StAR-related lipid transfer protein 4	Q96DR4	1	0	1	Cancer								1
ELOF1	EEFQTPITY	Transcription elongation factor 1 homolog	A0A024R7E8;K7EPC8;P60002	1	0	3	Cancer								1		1	1
KIF5A;KIF5B	AASPTHPSA;EEFTVARL;ESEVNRGDKY;ETKSTLLFGQR;EYLQNVEQK;EYLQNVEQKKR;KPYAFDRVF;RIKEAVRSK;THQKQISSL	Kinesin heavy chain isoform 5A;Kinesin-1 heavy chain;Kinesin-like protein	J3KNA1;P33176;Q12840	9	2	6	Both			1		1		1	5		1		2		1	1
DTNA;DTNB	DEHALIASY;EEHRLIARY	Dystrobrevin;Dystrobrevin alpha;Dystrobrevin alpha (Fragment);Dystrobrevin beta	E7EVB6;E9PEY4;K7ERH7;M0QZ28;M0R021;O60941;Q9Y4J8	2	0	2	Cancer								2			1
TMEM135	EEIPTHSF	Transmembrane protein 135	E9PQL0;Q86UB9	1	0	1	Cancer								1
CDH2	EEIVFPRQF	Cadherin-2;Cadherin-2 (Fragment)	C9JMH2;C9J126;C9J8J8;P19022	1	0	1	Cancer								1
GINS1	EEMEWFNNY	DNA replication complex GINS protein PSF1	Q14691	1	0	1	Cancer								1
MTMR9	EEMVNIIEY	Myotubularin-related protein 9	Q96QG7	1	0	1	Cancer								1
TARBP2	AATPVPSVV;EEQAFHVSY	RISC-loading complex subunit TARBP2;RISC-loading complex subunit TARBP2 (Fragment)	F8VSA1;F8VW32;F8VYK3;F8VZ57;H3BV98;Q15633	2	0	2	Cancer							1	1
NCOA5	EETDKIINY;REEIARQAA	Nuclear receptor coactivator 5	Q9HCD5	2	0	2	Cancer							1	1
ZNF7	EETVVPKTF	Zinc finger protein 7;Zinc finger protein 7 (Fragment)	E9PPK0;F5H290;P17097	1	0	1	Cancer								1
HSP90AA1;HSP90AA2P;HSP90AB1;HSP90AB3P	ALRDNSTMGYM;EEVETFAF;EILDKKVEK;EVVKKHSQF;GEPIGRGTKVIL;HHGEEEVETF;ILDKKVEKV;IPNPQERTL;MTEPIDEY;QVANSAFVER;STMGYMMAK;TEYLEERRV	Heat shock protein HSP 90-alpha;Heat shock protein HSP 90-alpha (Fragment);Heat shock protein HSP 90-alpha A2;Heat shock protein HSP 90-beta;Putative heat shock protein HSP 90-beta-3	G3V2J8;P07900;P08238;Q14568;Q58FF7	12	4	8	Both	+	3	1	1	1		2	3	2	2	1	4		3	1
GALNT12	EEVILVDDY	Polypeptide N-acetylgalactosaminyltransferase 12	Q8IXK2	1	0	1	Cancer								1
FAM234A;2	EEVSGHLY	Protein FAM234A;Protein FAM234A (Fragment);cDNA FLJ60496	C9K0C5;B4DGG1;Q9H0X4	1	0	1	Cancer								1
C8orf37	EEVTDLQTDH	Protein C8orf37	Q96NL8	1	0	1	Cancer								1
TMEM14B	EEWRSPSSH	Transmembrane protein 14B	A0A087WU83	1	0	2	Cancer								1			1
TXK	EEYLILEKY	Tyrosine-protein kinase TXK;Tyrosine-protein kinase TXK (Fragment)	E7EQN8;P42681	1	0	1	Cancer								1
CGAS	EEYSNTRAY;SEAGATAPKA	Cyclic GMP-AMP synthase	Q8N884	2	0	2	Cancer							1	1
TGFB2	EEYYAKEVY	Transforming growth factor beta-2 proprotein	P61812	1	0	1	Cancer	+							1
URI1	EFDDRRGVLR	Unconventional prefoldin RPB5 interactor 1;Unconventional prefoldin RPB5 interactor 1 (Fragment)	I3L280;O94763	1	0	1	Cancer								1
DERL3	EFLQVPAVTR	Derlin-3;Derlin	E7EVA4;Q96Q80	1	0	1	Cancer								1
PFDN2	EFREKHNIR;EHSLVIDTL	Prefoldin subunit 2	Q9UHV9	2	2	4	Both		1	1				1	1				1		1
MICU1	EFVSIMKQR;QHDVLKLEF	Calcium uptake protein 1, mitochondrial;Calcium uptake protein 1, mitochondrial (Fragment)	A0A0U1RRK1;A0A286YF11;E9PQV6;F6XEV2;Q9BPX6;S4R3W3	2	0	2	Cancer							1	1
MIPEP	EGLNILLNR	Mitochondrial intermediate peptidase	Q99797	1	0	1	Cancer								1
STX8	EIAEKIQQR	Syntaxin-8;Syntaxin-8 (Fragment)	I3L3D0;K7ER37;I3L305;Q9UNK0	1	0	1	Cancer								1
3;H2AFJ;H2AFX;H2AFY;H2AFY2;hCG_2039566;HIST1H2AB;HIST1H2AC;HIST1H2AD;HIST1H2AG;HIST1H2AH;HIST1H2AJ;HIST2H2AA3;HIST2H2AB;HIST2H2AC;HIST3H2A	AIITPPPAK;EILELAGNAAR;HPTTAEIDL;NPTNADIDL;SAGHGLPAK	Core histone macro-H2A.1;Core histone macro-H2A.2;Histone H2A;Histone H2A (Fragment);Histone H2A type 1;Histone H2A type 1-B/E;Histone H2A type 1-C;Histone H2A type 1-D;Histone H2A type 1-H;Histone H2A type 1-J;Histone H2A type 2-A;Histone H2A type 2-B;Histone H2A type 2-C;Histone H2A type 3;Histone H2A.J;Histone H2AX	A0A0U1RR32;A0A0U1RRH7;A0A3B3IS11;B4DJC3;D6RCF2;H0YFX9;O75367;P04908;P0C0S8;P16104;P20671;Q16777;Q5SQT3;Q6FI13;Q7L7L0;Q8IUE6;Q93077;Q96KK5;Q99878;Q9BTM1;Q9P0M6	5	0	4	Cancer								1	2					2	1
PLEKHG2	EILELLNQR	Pleckstrin homology domain-containing family G member 2;Pleckstrin homology domain-containing family G member 2 (Fragment)	E7ESZ3;H7BXC7;Q9H7P9;M0QX05	1	0	1	Cancer								1
EXOC3L2	EFLQSFQQR;EILSLIQQR;GEAAPEPPP	Exocyst complex component 3-like protein 2	A0A1C7CYX0;Q2M3D2	3	0	2	Cancer							1	2
DGKI	EISQDEIFI	Diacylglycerol kinase iota;Diacylglycerol kinase	E9PFX6;A0A087WV00;E7EM72;E7EWQ4;O75912	1	0	1	Cancer								1
TMEM120B	ELAALQTLCS	Transmembrane protein 120B;Transmembrane protein 120B (Fragment)	H0YG77;A0PK00	1	0	1	Cancer								1
NSUN5	ELARLKVHR	Probable 28S rRNA (cytosine-C(5))-methyltransferase	Q96P11	1	0	1	Cancer								1
BCL2;BCL2L1	EAGDEFEL;ELFRDGVNW;FATVVEELF;KLSQKGYSW;RIAAWMATY;VLLGSLFSRK	Apoptosis regulator Bcl-2;Bcl-2-like protein 1;Bcl-2-like protein 1 (Fragment)	P10415;Q07817;Q5QP56;Q5QP59;Q5TE64;Q9H1R6	6	1	4	Both	+					1		3			1		1	2
CYBRD1	ELNSEVAAR	Cytochrome b reductase 1	Q53TN4	1	0	1	Cancer								1
WWC3	ELQLIIAQR	Protein WWC3	Q9ULE0	1	0	1	Cancer								1
KLHL26	EMQSPRTAVR	Kelch-like protein 26	Q53HC5	1	0	1	Cancer								1
PRKCA;PRKCG	ENFDKFFTR	Protein kinase C alpha type;Protein kinase C gamma type	P17252;P05129	1	0	1	Cancer	+							1
MUC15	ENITTSNLK	Mucin-15;Mucin-15 (Fragment)	A0A3B3IU37;A0A0A0MTD6;A0A0A0MT67;Q8N387	1	0	1	Cancer								1
MAOA	EPHEVSALW	Amine oxidase [flavin-containing] A	P21397	1	0	1	Cancer								1
SOX18	EPLGPAADLW	Transcription factor SOX-18	P35713	1	0	1	Cancer								1
SSBP2;SSBP3;SSBP4	EPPGFLHSW;SEAKAFHDY;YVYEYLLHV	Single-stranded DNA-binding protein 2;Single-stranded DNA-binding protein 2 (Fragment);Single-stranded DNA-binding protein 3;Single-stranded DNA-binding protein 4;Single-stranded DNA-binding protein 4 (Fragment)	A0A087WVT6;A0A087X159;D6RAC5;P81877;Q9BWG4;Q9BWW4;U3KQ46	3	0	3	Cancer								1	1		1
RTL10	EILRRLTGR;ESANPPAQR	Protein Bop	Q7L3V2	2	0	1	Cancer								2
RNF6	ESRPVQQTTR	E3 ubiquitin-protein ligase RNF6	Q9Y252	1	0	1	Cancer								1
LCN1;LCN1P1	ESVTPMTL	Lipocalin-1;Putative lipocalin 1-like protein 1	Q5VSP4;P31025	1	0	1	Cancer								1
IL4I1	ETAVKSALR	L-amino-acid oxidase	Q96RQ9	1	0	1	Cancer								1
SACS	ETFAFLKRF;FLADIVQKL	Sacsin	Q9NZJ4	2	1	4	Both			1				1	1				1		1
DIPK2A	ETKDSGSFLLR	Divergent protein kinase domain 2A	Q8NDZ4	1	0	1	Cancer								1
C4orf48	ETLLLQAER	Neuropeptide-like protein C4orf48	Q5BLP8	1	0	2	Cancer								1		1
VPS36	ETLVIQQR;ETYGSGTQY	Vacuolar protein-sorting-associated protein 36	A0A3B3ISW7;Q86VN1	2	0	3	Cancer							1	1				1
USF2	ETNGGQVTYR	Upstream stimulatory factor 2;Upstream stimulatory factor 2 (Fragment);cDNA FLJ60670, highly similar to Upstream stimulatory factor 2	M0QY46;B4DLJ1;Q15853	1	0	1	Cancer								1
ABCC1;ABCC2	AAVDLETDN;AYLSAVGTF;ETNIVAVER;FAVISRHSL;TIIPQDPVL;TYLNWLVRM;VYSHFNETL	Canalicular multispecific organic anion transporter 1;Multidrug resistance-associated protein 1;Multidrug resistance-associated protein 1 (Fragment)	A0A0A0MS99;I3L4X2;P33527;Q92887	7	1	5	Both						1		1	1		1	1		3
VIL1	ETNSYDVQR	Villin-1;Villin-1 (Fragment)	C9J2B5;P09327	1	0	1	Cancer								1
TAF4B	ETTSNITSR	Transcription initiation factor TFIID subunit 4B;HCG38478, isoform CRA_a	J3KTH2;Q92750	1	0	1	Cancer								1
ACOT7	EVAGIVAAR	Cytosolic acyl coenzyme A thioester hydrolase;Cytosolic acyl coenzyme A thioester hydrolase (Fragment)	K7EKP8;O00154	1	0	1	Cancer								1
RETN	EVAGSLIFR	Resistin	Q9HD89	1	0	1	Cancer								1
SAAL1	EVASVWVER	Protein SAAL1;Protein SAAL1 (Fragment)	H0YCN7;E9PL53;H0YEK5;E9PMD2;J3KND1;E9PRZ1;Q96ER3	1	0	1	Cancer								1
ZNF189	EVEPQGVIVTR	Zinc finger protein 189	O75820	1	0	1	Cancer								1
DNAJC2	EVFTPVFER	DnaJ homolog subfamily C member 2;DnaJ homolog subfamily C member 2 (Fragment)	C9IZ83;H7C3L7;Q99543	1	0	1	Cancer								1
CSF2RA	EVHVNTSQR	Granulocyte-macrophage colony-stimulating factor receptor subunit alpha;Granulocyte-macrophage colony-stimulating factor receptor subunit alpha (Fragment)	J3JS74;F2Z3C9;P15509	1	0	1	Cancer	+							1
NUDT10;NUDT11;NUDT3;NUDT4;NUDT4B	EVLLVSSSR;RTYDGDGYKK;RTYDREGFKK;VYVLTVTEL	Diphosphoinositol polyphosphate phosphohydrolase 1;Diphosphoinositol polyphosphate phosphohydrolase 2;Diphosphoinositol polyphosphate phosphohydrolase 3-alpha;Diphosphoinositol polyphosphate phosphohydrolase 3-beta;Diphosphoinositol polyphosphate phosphohydrolase NUDT4B	A0A024RBG1;O95989;Q8NFP7;Q96G61;Q9NZJ9	4	0	4	Cancer								2	1					1	2
GOLGA3	EVNGEVRSR	Golgin subfamily A member 3	Q08378	1	0	1	Cancer								1
PTGFRN	EVQETRRER	Prostaglandin F2 receptor negative regulator	Q9P2B2	1	0	1	Cancer								1
SIGLEC16;SIGLEC11	EVQKGQFLR	Sialic acid-binding Ig-like lectin 16;Sialic acid-binding Ig-like lectin 11	A6NMB1;Q96RL6	1	0	1	Cancer								1
RORC	EVQKQLQQR	Nuclear receptor ROR-gamma;Nuclear receptor ROR-gamma (Fragment)	A0A494C0H2;A0A494C0S6;P51449	1	0	1	Cancer								1
IGHV3-15;IGHV3-21	EVQLVESGGGLVK;EVQLVESGGGLVKP;EVQLVESGGGLVKPG;EVQLVESGGGLVKPGG;EVQLVESGGGLVKPGGS;EVQLVESGGGLVKPGGSL;EVQLVESGGGLVKPGGSLR;EVQLVESGGGLVKPGGSLRL	Immunoglobulin heavy variable 3-15;Immunoglobulin heavy variable 3-21	A0A0B4J1V0;A0A0B4J1V1	8	5	9	Both		4	5	8	6	7	5	7	6	8	6	7	4	7	3
IGHV1-69-2;IGHV3OR16-10;IGHV5-10-1;IGHV5-51	ASDTAMYY;EVQLVQSG;EVQLVQSGA;EVQLVQSGAEVK;EVQLVQSGAEVKK;EVQLVQSGAEVKKPG;EVQLVQSGAEVKKPGE;EVQLVQSGAEVKKPGES;EVQLVQSGAEVKKPGESL;EVQLVQSGG;EVQLVQSGGG;EVQLVQSGGGL;YWIGWVRQM	Immunoglobulin heavy variable 1-69-2;Immunoglobulin heavy variable 3/OR16-10 (non-functional) (Fragment);Immunoglobulin heavy variable 5-10-1;Immunoglobulin heavy variable 5-51	A0A075B7F0;A0A0C4DH38;A0A0G2JMI3;A0A0J9YXX1	13	5	9	Both		1	3	7	5	4	1	2	1	3	7	9	8	11	2
FADD	EVQQARDLQNR	FAS-associated death domain protein	Q13158	1	0	1	Cancer	+							1
PQLC1	EVRVANELNAR	PQ-loop repeat-containing protein 1;PQ-loop repeat-containing protein 1 (Fragment)	K7ERV4;K7EMG2;Q8N2U9	1	0	1	Cancer								1
CERCAM	EYFPTKNRQR	Inactive glycosyltransferase 25 family member 3;Inactive glycosyltransferase 25 family member 3 (Fragment)	X6RL83;A0A087WYE2;Q5T4B2	1	0	1	Cancer								1
RCOR1;RCOR3	DEAPVLDVRY;DEYIAIAK;EYIAIAKEK;EYQARIPEF;KYGRDFQAI;LPDKSIASL;LPDKTIASL;SIASLVKFY;TIASLVKYY	REST corepressor 1;REST corepressor 3;REST corepressor 3 (Fragment)	B4DV59;E9PPC5;E9PQE5;E9PR63;Q9P2K3;Q9UKL0	9	1	6	Both						1	1	3			1	3		3	1
CREB3L3	EYIDGLETRM	Cyclic AMP-responsive element-binding protein 3-like protein 3	Q68CJ9	1	0	1	Cancer								1
CCP110	EYIEREQSR	Centriolar coiled-coil protein of 110 kDa	O43303	1	0	1	Cancer								1
ABL1;ABL2	EYLEKKNFIHR;GPSENDPNL;KENIEGAQ;LPEQDRMAM;SEQMASHSA;SVKEISDIVQR;TYGNLLDYL;VADGLITTL;VADGLVTTL;VYVTAESRF	Tyrosine-protein kinase ABL1;Tyrosine-protein kinase ABL2	P00519;P42684	10	1	5	Both	+					1	1	3				2		4	2
LPO	EYLKHAKGR	Lactoperoxidase;Lactoperoxidase (Fragment)	J3QSD8;F5H386;P22079	1	0	1	Cancer								1
MEF2A;MEF2C;MEF2D	AEGSAVKRM;AELSSLPAF;DMDKVLLKY;EELDGLFRRY;EYNEPHESR;FSSPGGLSL;KYKKINEEF;LPFSSMPTAY;MPTAYNTDY;MPVSIPVSSHNSLVY;NTMPSVNQR;SEELDGLFRRY;SPDPDTSYVL;TEDRESPSV;YPSAISTTY	MADS box transcription enhancer factor 2, polypeptide C (Myocyte enhancer factor 2C), isoform CRA_e;MEF2D protein;Myocyte enhancer factor 2c;Myocyte-specific enhancer factor 2A;Myocyte-specific enhancer factor 2A (Fragment);Myocyte-specific enhancer factor 2C;Myocyte-specific enhancer factor 2C (Fragment);Myocyte-specific enhancer factor 2D	A0A0D9SET2;A0A0D9SFD0;A0A0D9SFV9;A0A0D9SG58;A0A0D9SGF3;A0A0D9SGI5;A0A0R4J2G5;A0A1B0GTW4;A0A1B0GV32;D6R942;D6RB91;D6RC63;D6RCM6;D6RG14;D6RG21;D6RJA7;D6RJG6;D8L7E9;H0YKY6;H0YM62;Q02078;Q05BX2;Q06413;Q14814	15	2	8	Both		1			1		1	2	3		3	2	1	2	4
DES;GFAP;INA;NEFH;NEFL;NEFM;VIM	ADAINTEFKNT;AINTEFKNT;ALRDVRQQ;ALRDVRQQY;ALRPSTSRSL;ALRPSTSRSLY;ANRNNDALRQAKQE;ASSPGGVYAT;ASSPGGVYATRSSAV;ASSPGGVYATRSSAVR;AVRLRSSVPGVR;AVRLRSSVPGVRLL;DAINTEFKNT;DAINTEFKNTRTNEKVELQ;DGQVINET;DGQVINETSQHHDDLE;DLERKVESL;DVRQQYESV;EAANRNNDALR;EAANRNNDALRQAKQE;EAANYQDTIGR;EEAENTLQSF;EEIAFLKKL;EEIQELQAQI;EEIRELQAQL;EENFAVEA;ELRTTKSEM;ETNLDSLPL;ETRDGQVIN;ETRDGQVINE;ETRDGQVINET;ETRDGQVINETS;ETRDGQVINETS…	Alpha-internexin;Desmin;Glial fibrillary acidic protein;Glial fibrillary acidic protein (Fragment);Neurofilament heavy polypeptide;Neurofilament light polypeptide;Neurofilament light polypeptide (Fragment);Neurofilament medium polypeptide;Vimentin;Vimentin (Fragment)	A0A087X0W2;A0A0S2Z436;A0A1B0GTT5;A0A1B0GVG8;A0A1W2PR46;A0A1W2PRT3;A0A1X7SBR3;A0A1X7SCE1;B0YJC4;B0YJC5;E7EMV2;E7ESP9;K7EJU1;K7EMP8;P07196;P07197;P08670;P12036;P14136;P17661;Q16352	186	5	9	Both		14	25	1	4	10	10	23	18	8	6	93	7	81	31
PHLDB2	EYQRNIVSR	Pleckstrin homology-like domain family B member 2;Pleckstrin homology-like domain family B member 2 (Fragment)	E9PFQ4;Q86SQ0;A0A1W2PQ63;E9PGF6	1	0	1	Cancer								1
ZNF586	EYRKLFKNK	Zinc finger protein 586	Q9NXT0	1	0	1	Cancer								1
PPP1R15A	EYRSGEASE	Protein phosphatase 1 regulatory subunit 15A	O75807	1	0	1	Cancer								1
SIGLEC8;SIGLEC6	EYSEIKIHK	Sialic acid-binding Ig-like lectin 8;Sialic acid-binding Ig-like lectin 6	C9JT30;O43699;Q9NYZ4	1	0	1	Cancer								1
SIGLEC9	EYSEIKIHR	Sialic acid-binding Ig-like lectin 9	Q9Y336	1	0	2	Cancer								1		1
SIGLEC7	EYSEIKIPK	Sialic acid-binding Ig-like lectin 7	Q9Y286	1	0	1	Cancer								1
RAD17	EYSTSIATR	Cell cycle checkpoint protein RAD17;Cell cycle checkpoint protein RAD17 (Fragment)	H0Y9T7;A0A0G2JP31;A0A0G2JNH5;A0A0G2JP78;A0A0G2JPT5;O75943	1	0	1	Cancer								1
PHB2	EYTAAVEAK;IATSQNRIY;NASQLITQR	Prohibitin-2;Prohibitin-2 (Fragment)	F5GWA7;F5GY37;F5H3X6;J3KPX7;Q99623;U3KPZ5	3	1	4	Both		2					1	1		1		1
MFF	EYTEGISQR	Mitochondrial fission factor;Mitochondrial fission factor (Fragment)	C9JI76;E9PPR7;C9JU19;C9JAF1;C9JHF5;Q9GZY8	1	0	2	Cancer								1		1
THBS2	EYVGPSSER	Thrombospondin-2	A0A3B3ITK0;P35442	1	0	1	Cancer								1
SUPT20H	EYVIESARQR	Transcription factor SPT20 homolog;Transcription factor SPT20 homolog (Fragment)	C9JQS2;F6S7C4;Q8NEM7	1	0	1	Cancer								1
FAP	EYYASVYTER	Prolyl endopeptidase FAP	B4DLR2;A0A0D9SEN1;Q12884	1	0	1	Cancer								1
IRAK3	FAEDPPTSL;RVEIQNLTY	Interleukin-1 receptor-associated kinase 3	Q9Y616	2	0	2	Cancer							1	1
CHMP1B	AEQDELSQRLA;FEHQFETL	Charged multivesicular body protein 1b	Q7LBR1	2	1	3	Both						1	1	1				1
TNFAIP3	FELVQHEY	Tumor necrosis factor alpha-induced protein 3;Truncated tumor necrosis factor alpha-induced protein 3	A0A087WXL5;A0A087X1N1;D3TTY5;A0A087WU80;P21580	1	0	1	Cancer								1
LSM14B	FFDNISSEL	Protein LSM14 homolog B;Protein LSM14 homolog B (Fragment)	Q5TBP9;Q9BX40	1	1	4	Both						1		1			1			1	1
SLC26A2	EVFESVSAY;FGVLCLMIGE	Sulfate transporter;Sulfate transporter (Fragment)	H0YA38;P50443	2	1	3	Both		1					1	1				1
ZC3H8	FINQHTVER	Zinc finger CCCH domain-containing protein 8	A0A0C4DGZ1;Q8N5P1	1	0	1	Cancer								1
PPP1R3G	FLDVPAEL	Protein phosphatase 1 regulatory subunit 3G	B7ZBB8	1	0	1	Cancer								1
FAM81B	FLKYRKDHL	Protein FAM81B	Q96LP2	1	0	1	Cancer								1
AKAP8	FLQEYIVNR	A-kinase anchor protein 8	O43823	1	0	1	Cancer								1
CPPED1	FPAEKESEW;QHAIVFQHI	Serine/threonine-protein phosphatase CPPED1	Q9BRF8	2	0	5	Cancer							1	1				1		1	1
TMEM38B	DTLSWMLFG;FPFFDIAHY	Transmembrane protein 38B, isoform CRA_b;Trimeric intracellular cation channel type B	A0A0A0MRS4;Q9NVV0	2	1	2	Both		1						1							1
PPCS	FPQPPGAARW	Phosphopantothenate--cysteine ligase	Q5VVM2;Q5VVM3;Q9HAB8	1	0	1	Cancer								1
KCNK9	FPSPISSISPG	Potassium channel subfamily K member 9;Potassium channel subfamily K member 9 (Fragment)	A0A3B3ITR0;A0A3B3IU12;Q9NPC2	1	0	6	Cancer								1			1	1	1	1	1
KCNG1;KCNG2	FPVTSIFHTF;RYLQKIEEF;VVDNPHSGL	Potassium voltage-gated channel subfamily G member 1;Potassium voltage-gated channel subfamily G member 1 (Fragment);Potassium voltage-gated channel subfamily G member 2	A0A075B6P6;A2A2I8;Q9UIX4;Q9UJ96	3	0	4	Cancer								1				1		1	1
HPCA;HPCAL1;HPCAL4;NCALD;VSNL1	FPYGDASKF;NEHELKQWY	Hippocalcin-like protein 1;Hippocalcin-like protein 4;Neurocalcin-delta;Neurocalcin-delta (Fragment);Neuron-specific calcium-binding protein hippocalcin;Visinin-like protein 1;Visinin-like protein 1 (Fragment)	A0A1B0GXG3;E5RFL9;E5RGA9;E5RGZ0;E5RHC8;E5RHE8;E5RI78;E5RI95;E5RIA5;E5RIG4;E5RIZ1;E5RJJ6;E5RJT1;E5RK89;E7ER47;E9PC71;E9PE24;P37235;P61601;P62760;P84074;Q9UM19	2	0	2	Cancer								2							1
FAIM	FVDDGTETHF	Fas apoptotic inhibitory molecule 1	Q9NVQ4	1	0	2	Cancer								1	1
ESCO2	FWDGKIVLV	N-acetyltransferase ESCO2;N-acetyltransferase ESCO2 (Fragment)	H0YB88;Q56NI9	1	0	1	Cancer								1
DPY19L3;DPY19L4	APSQDFFL;EAFGLLPFN;FPAQEENVKL;FYDPDTVEL;HPHYEDSSL;KSLKETVTL;KTINAVQQM;NYSPYVNYF;QSDKVYEVY;RLSDTLLFY;TAYNLIHTI	Dpy-19-like 3 (C. elegans);Probable C-mannosyltransferase DPY19L3;Probable C-mannosyltransferase DPY19L3 (Fragment);Probable C-mannosyltransferase DPY19L4;Probable C-mannosyltransferase DPY19L4 (Fragment)	E5RGB7;H0YAT0;H0YBL6;H0YBV9;K7ELB5;K7ELG1;K7ELH8;Q6ZPD9;Q7Z388;Q8N6Q4;S4R3D3	11	2	7	Both				1	3		1	2			1	2	1	6	3
EPB41;EPB41L1;EPB41L3	AAIHISETL;AEFSRPASV;APIAAPEPEL;DPSLDLHSL;FYPPDPAQL;HEIYMKDSM;HTETKTITY;IPTGEGPPL;KEDEPPEQA;KELEDKVIEL;KLQHPDMLVTK;KVMELHKSY;RLPSSPASPSPK;STDTIPKSK;STTTTQITK;TPAEAEMHF;TVSSLAIRK;VLSPASDKGGL;VTDKEQEF	Band 4.1-like protein 1;Band 4.1-like protein 1 (Fragment);Band 4.1-like protein 3;Band 4.1-like protein 3 (Fragment);EPB41 protein;Erythrocyte membrane protein band 4.1 (Elliptocytosis 1, RH-linked), isoform CRA_e;Protein 4.1;Protein 4.1 (Fragment)	A0A0A0MRA8;A0A0A0MSA4;A0A0C4DH22;A0A0J9YW26;A0A0J9YY18;A0A1B0GTF8;A0A1B0GTW6;A0A1B0GWG0;A0A2R8Y420;A0A2R8Y4N6;A0A2R8Y570;A0A2R8Y5C8;A0A2R8Y5G2;A0A2R8Y5Z6;A0A2R8Y6D0;A0A2R8Y6G5;A0A2R8Y6T6;A0A2R8Y783;A0A2R8Y7N0;A0A2R8Y7Y3;A0A2R8YCW8;A0A2R8YD30;A0A2R8YFR9;A0A2R8YFU8;A0A2U3TZH6;A0A3B3ITC5;A0A3B3ITP0;A0A3B3IU06;A0A3B3IUD6;A8K968;H0Y482;H7C2K6;J3KRD1;J3KS70;J3KT37;J3QKK4;J3QKY2;J3QLU5;J3QR33;J3QRQ6;J3Q…	19	2	7	Both					1	2	2	6	3			1	1	6	5
1;4;CRIP1	AMFGPKGFGRGGAESHTFK;GGAESHTFK;KDWHRPCLK;YFAERVTSL	Cysteine-rich protein 1;Uncharacterized protein (Fragment)	H3BRQ4;K4DIB9;P50238	4	0	3	Cancer								2				1			1
CHTF18	GLDPSQRPK	Chromosome transmission fidelity protein 18 homolog;Chromosome transmission fidelity protein 18 homolog (Fragment)	H0Y7D3;F8WCC1;E7EXA6;A0A0D9SF58;Q8WVB6	1	0	2	Cancer								1							1
MORC4	GLNNKTIGY	MORC family CW-type zinc finger protein 4	Q8TE76	1	0	2	Cancer								1							1
EPS15L1	DETQMISSL;GLSDIILGK	Epidermal growth factor receptor substrate 15-like 1;Epidermal growth factor receptor substrate 15-like 1 (Fragment)	K7EJR2;M0QX30;M0R165;M0R1V5;M0R2S2;M0R330;Q9UBC2	2	0	1	Cancer								2
MCTS1;MCTS2P	GLWHMKTYK;HEHIEILTV;MAEGKQHAL	Malignant T-cell-amplified sequence;Malignant T-cell-amplified sequence 1	A0A3B3IRV3;Q9ULC4	3	1	3	Both						1		1				1		1
XPC	GLYKNHPLY	DNA repair protein complementing XP-C cells	Q01831	1	0	1	Cancer								1
SKI	FETAVAPNV;GPAAFSARW;QELEFLRVA;QHAEADREQL;RELEQARQA	Ski oncogene	P12755	5	2	4	Both		1				1	3	1				2	1
CACNA1A	GPGQNALPSTQLDPGG	Voltage-dependent P/Q-type calcium channel subunit alpha-1A;Voltage-dependent P/Q-type calcium channel subunit alpha-1A (Fragment);Voltage-dependent P/Q-type calcium channel subunit alpha	A0A1B0GUM7;K7EKF7;K7EQ95;A0A384DVW2;A0A1B0GTI4;B5TYJ1;A0A1B0GVQ9;A0A1B0GU74;A0A1B0GTW2;A0A1B0GUS3;A0A1B0GU81;A0A1B0GTN7;A0A1C7CYY9;A0A087WW63;O00555	1	0	1	Cancer								1
TADA2A	GPPPFFLCL	Transcriptional adapter 2-alpha;Transcriptional adapter 2-alpha (Fragment);Transcriptional adapter	A0A0J9YWZ4;A0A087WZS1;A0A0J9YXZ4;A0A087WU71;A0A087WWR4;A0A024R0Y4;O75478	1	0	3	Cancer								1				1		1
NRBP1;NRBP2	AEVETRKVVL;EEQKNLHFF;GEVTNVTTA;GSLKQFLKK;MPNENIPEL;NMDTSAVL;REEQKNLHFF;SEADQSRLTSL	Nuclear receptor-binding protein;Nuclear receptor-binding protein 2;Nuclear receptor-binding protein 2 (Fragment)	E9PR11;F8W6G1;Q9NSY0;Q9UHY1	8	1	5	Both		1					1	2	4					1	2
DYNLL1;DYNLL2	GSYVTHETK;IEKDIAAHI;NADMSEEM;TQALEKYNI	Dynein light chain;Dynein light chain (Fragment);Dynein light chain 1, cytoplasmic;Dynein light chain 2, cytoplasmic	F8VRV5;F8VXI7;F8VXL2;P63167;Q96FJ2	4	0	5	Cancer							1	2	1			2			1
BLOC1S4	GTFPRAFKK	Biogenesis of lysosome-related organelles complex 1 subunit 4	Q9NUP1	1	0	2	Cancer								1							1
1;HIST1H2BA;HIST1H2BB;HIST1H2BC;HIST1H2BD;HIST1H2BH;HIST1H2BL;HIST1H2BM;HIST1H2BN;HIST1H2BO;HIST2H2BE;HIST2H2BF;HIST3H2BB	ASEASRLAHY;AVTKYTSSK;GTKAVTKYTSSK;PDPAKSAPAPK;PDPAKSAPAPKKGSKKAV;PEPSKSAPAPKK;PEPTKSAPAPKKGSKKAVTK;SEASRLAHY	Histone H2B;Histone H2B type 1-A;Histone H2B type 1-B;Histone H2B type 1-C/E/F/G/I;Histone H2B type 1-D;Histone H2B type 1-H;Histone H2B type 1-L;Histone H2B type 1-M;Histone H2B type 1-N;Histone H2B type 1-O;Histone H2B type 2-E;Histone H2B type 2-F;Histone H2B type 3-B	A0A2R8Y619;P23527;P33778;P58876;P62807;Q16778;Q5QNW6;Q8N257;Q93079;Q96A08;Q99877;Q99879;Q99880;U3KQK0	8	5	6	Both		1	1	1	1	1	1	2	2			3		4	2
ZDHHC4	GTNPGIITK	Probable palmitoyltransferase ZDHHC4;Probable palmitoyltransferase ZDHHC4 (Fragment)	C9J5I9;Q9NPG8	1	0	2	Cancer								1							1
ASAP1;ASAP2	EIISEVQRM;EYLLKVNEI;GAFTNQIFV;GTSELLLAK;KTADKLKQY;MPSILQNETY;NYAQVLDKF;QYTQALEKF;SELLLAKNV	Arf-GAP with SH3 domain, ANK repeat and PH domain-containing protein 1;Arf-GAP with SH3 domain, ANK repeat and PH domain-containing protein 1 (Fragment);Arf-GAP with SH3 domain, ANK repeat and PH domain-containing protein 2;Arf-GAP with SH3 domain, ANK repeat and PH domain-containing protein 2 (Fragment)	A0A0A0MRE5;A0A286YFG8;E5RHD7;H0YBF7;H0YBM4;O43150;Q9ULH1	9	1	5	Both		1					2	1				4		3	3
ALPI;ALPP	GTYAHTVNR;HPVAASLPL	Alkaline phosphatase, placental type;Intestinal-type alkaline phosphatase	P05187;P09923	2	0	3	Cancer								1						1	2
TPPP3	GTYDAKVKK	Tubulin polymerization-promoting protein family member 3	Q9BW30	1	0	3	Cancer								1	1						1
PFN1	GVHGGLINK	Profilin-1;Profilin	K7EJ44;P07737	1	0	3	Cancer								1	1						1
EXOSC3	GVIGQDGLLFK	Exosome complex component RRP40	Q9NQT5	1	0	1	Cancer								1
SLC26A7	GVSMLVEVY	Anion exchange transporter	A0A087WZI7;Q8TE54	1	0	1	Cancer								1
NRBF2	HAETATASSTW	Nuclear receptor-binding factor 2	Q96F24	1	0	1	Cancer								1
CIDEB	HAVEGAEQW	Cell death activator CIDE-B	Q9UHD4	1	0	1	Cancer								1
FAM199X	DEASAITSY;HEADVDVLM	Protein FAM199X	Q6PEV8	2	0	1	Cancer								2
SLC35A2	FFATTAVVM;HEAVLVQY;QAFGGLLVA	cDNA FLJ53300, highly similar to UDP-galactose translocator;cDNA FLJ59970, highly similar to UDP-galactose translocator;UDP-galactose translocator;UDP-galactose translocator (Fragment)	A0A0U1RR48;A0A0U1RR61;A0A0U1RRB4;A0A0U1RRG4;A0A0X1KG77;A6NFI1;A6NGW4;A6NKM8;B4DE15;B4DSH7;C9JCV5;P78381	3	0	2	Cancer							2	1
GRSF1;HNRNPH1;HNRNPH2;HNRNPH3	DTANDGFVRL;GAYGGGYGGY;GGYGGGYGGQSSMSGYDQVL;GTSGIRFIY;HEDAVAAM;HRYGDGGSTF;LNSTAGASGGAYGSQ;LPFRATENDIANFF;LPYRATENDIY;MSKDKANMQHR;QENSSDFQSNIA;RYGDGGSTF;SADEVMRFF;SADEVQRFF;TENDIANFF;THEDAVAAM;YEHRYVELF;YGDGGSSF;YGDGGSTF	G-rich sequence factor 1;G-rich sequence factor 1 (Fragment);Heterogeneous nuclear ribonucleoprotein H;Heterogeneous nuclear ribonucleoprotein H (Fragment);Heterogeneous nuclear ribonucleoprotein H2;Heterogeneous nuclear ribonucleoprotein H3	D6R9D3;D6R9T0;D6RAM1;D6RBM0;D6RDL0;D6RDU3;D6RF17;D6RFM3;D6RIH9;D6RIT2;D6RIU0;D6RJ04;E5RGH4;E5RGV0;E7EN40;E7EQJ0;E9PCY7;F5H5I6;G8JLB6;H0Y8R1;H0YAK1;H0YAQ2;H0YB39;H0YBD7;H0YBG7;H0YBK1;P31942;P31943;P55795;Q12849	19	2	8	Both			1			2	4	5	3		2	3	1	1	4
CDKL2	HENLVNLL	Cyclin-dependent kinase-like 2	J3KNE8;Q92772	1	0	1	Cancer								1
MAP3K2;MAP3K3	EYDDSRIRR;HERIVQYY;IAFSRPVKY;SYPDNHQEF;YSDRETQLY	Mitogen-activated protein kinase kinase kinase 2;Mitogen-activated protein kinase kinase kinase 3	J3KRN4;J3QRB6;Q99759;Q9Y2U5	5	1	7	Both		1					2	2		1	1	1		2	1
STIM1;STIM2	EVTAALRER;HEVEVQYY;IEFVELPQY;KELESHSSW;KIFKKPLKK;KVYNGILEK;LPSPDPDIL;QEAPSVARI;THSDSESSL;YHDPTVKHSTF	STIM1L;Stromal interaction molecule 1;Stromal interaction molecule 1 (Fragment);Stromal interaction molecule 2;Stromal interaction molecule 2 (Fragment)	A0A1W2PRA1;A0A1X7SBY3;E9PIQ8;E9PJ19;E9PMB4;E9PN27;E9PNJ4;E9PR07;E9PR09;E9PRE4;E9PRZ7;G0XQ39;H0Y860;H0YDB2;H7C5A5;H7C5C6;H7C5K2;Q13586;Q9P246;R4GMP0;R4GN82	10	2	6	Both		1		1			1	5		1	1	3		1
RABL3	HEVLTRTAF	Rab-like protein 3	C9JXM3;Q5HYI8	1	0	1	Cancer								1
FAAP20	HEVPSLPAF	Fanconi anemia core complex-associated protein 20;Fanconi anemia core complex-associated protein 20 (Fragment)	H7C361;H7C2E6;Q6NZ36	1	0	1	Cancer								1
4;RBM7	HEVSVPYAM;SHAPQDVSL;YPYLADRHY;YTDHGSDHHY	RNA binding motif protein 7, isoform CRA_a;RNA binding motif protein 7, isoform CRA_c;RNA-binding protein 7;Uncharacterized protein (Fragment)	F5GXV8;F5GY08;F5H606;G3V1T9;I3L521;J3KPD3;Q9Y580	4	2	6	Both		1			1		2	1				1	1	2	2
NOD1	HIRNTQCLVDN	Nucleotide-binding oligomerization domain-containing protein 1;Nucleotide-binding oligomerization domain-containing protein 1 (Fragment);Caspase recruitment domain family, member 4, isoform CRA_c	C9J8X8;A0A1B0GX71;G3XAL1;Q9Y239	1	0	1	Cancer								1
PELI3	HISTPLVSK	E3 ubiquitin-protein ligase pellino homolog 3;E3 ubiquitin-protein ligase pellino homolog 3 (Fragment)	E9PQX6;E9PI91;Q8N2H9	1	0	3	Cancer								1	1						1
TMC5	GESGPVHAY;HIYSGGITK	Transmembrane channel-like protein;Transmembrane channel-like protein 5	F5GYU8;H3BN68;Q6UXY8	2	0	1	Cancer								2
ACTN1;ACTN2;ACTN3;ACTN4	AEFARIMSI;AEFNRIMSL;AHDQFKSTL;AIDQLHLEY;DADKERLAI;DEKAIMTY;DTADQVIASF;DTDTADQVM;DYYDSHNVNTR;EADGERQSI;EEIEGLISA;EEIQGLTTA;EVSKIVQTY;FIVHTIEEI;GEAEFNRI;GTLEDQLSHLK;HAANQSYQY;HLAEKFRQK;HRDYETATL;HTIEEIEGL;IRVGWEQLL;LPDADKERL;NAFEVAEKY;NEHLMEDY;NEVSKIVQTY;PYTTVTPQI;QEQMNEFRA;QEQMQEFRA;QHQLIQEAL;TAFDVAEKY;TIDQLYLEY;VPENTMHAM;YESASLTEV	Alpha-actinin-1;Alpha-actinin-1 (Fragment);Alpha-actinin-2;Alpha-actinin-2 (Fragment);Alpha-actinin-3;Alpha-actinin-4;Alpha-actinin-4 (Fragment)	A0A087WSZ2;A0A494C060;A0A494C1A0;F5GXS2;F6THM6;G3V2N5;G3V2W4;H0YJ11;H0YJW3;H7C144;H7C5W8;H9KV75;K7EJH8;K7EP19;O43707;P12814;P35609;Q08043	33	4	8	Both		4	2		2	2	7	4		5	3	8	3	10	6
RCAN2	HLAPPQPAK	Calcipressin-2	A0A0A0MSB6;Q14206	1	0	1	Cancer								1
PARPBP	HLDRSKNEK	PCNA-interacting partner	B4DZ31;Q9NWS1	1	0	2	Cancer								1							1
C12orf66	HLFGGQSQK	KICSTOR complex protein C12orf66	F5H2Q3;J3KNH0;Q96MD2	1	0	1	Cancer								1
TPK1	HLWNKALLR	Thiamin pyrophosphokinase 1;Thiamin pyrophosphokinase 1 (Fragment)	F8WCM7;F8VRJ6;F5GZG6;Q9H3S4	1	0	1	Cancer								1
ZSWIM5;ZSWIM6	FTENMGQCKSLEY;HPAINDVLW;HPLDPVGTLF;LPHDAELAY;YHDDTENSL	Zinc finger SWIM domain-containing protein 5;Zinc finger SWIM domain-containing protein 6	Q9HCJ5;Q9P217	5	2	5	Both		1	1				1	2				1		1	2
STK38L;CDC42BPG	HPFFEGVDW	Serine/threonine-protein kinase 38-like;Serine/threonine-protein kinase MRCK gamma	Q9Y2H1;Q6DT37	1	0	1	Cancer								1
COL4A2	HPIIAPTGVTF	Collagen alpha-2(IV) chain;Collagen alpha-2(IV) chain (Fragment)	A0A087WY39;A0A3B3ITQ8;P08572	1	0	2	Cancer	+							1							1
GLMP	DEYAPAVF;HPMNDPTRTF	Glycosylated lysosomal membrane protein;Glycosylated lysosomal membrane protein (Fragment)	A0A087WV34;A0A087X0W3;Q8WWB7;V9GYY1;X6R6A3	2	0	2	Cancer								2							1
CNK3/IPCEF1;IPCEF1	AETPPPPHA;DEGQPITF;HPQIKTFYF	CNK3/IPCEF1 fusion protein;Interactor protein for cytohesin exchange factors 1;Interactor protein for cytohesin exchange factors 1 (Fragment)	A0A2Q2T6B6;E5RGB6;E5RGN6;E5RJQ7;G9CGD6;Q8WWN9	3	0	2	Cancer							1	2
ARSA	HPSSTTPNL	Arylsulfatase A	A0A0C4DFZ2;P15289	1	0	2	Cancer								1							1
ANKRD1	HPVTLGEQQW	Ankyrin repeat domain-containing protein 1	Q15327	1	0	1	Cancer								1
CUTA	HPYEVAEVI	Protein CutA	O60888	1	1	2	Both				1				1						1
ZNF134	HSNLIVHQR	Zinc finger protein 134	P52741	1	0	1	Cancer								1
CHAF1B	ASEDSVLLY;HTKAVNVVR	Chromatin assembly factor 1 subunit B	Q13112	2	0	3	Cancer							1	1						1
PGAP3	HTRDTDLTEK	Post-GPI attachment to proteins factor 3	Q96FM1	1	0	1	Cancer								1
WNK1;WNK2;WNK3	ATSLGHFTK;FPATPFGAQW;FPSEITDTV;HEIESLYTKL;HTRTPPIIHR;IHSQPQPAL;QEETGVRVEL;SEITDTVAA;TAKSQLVEI;VAGPAPSTV	Serine/threonine-protein kinase WNK1;Serine/threonine-protein kinase WNK1 (Fragment);Serine/threonine-protein kinase WNK2;Serine/threonine-protein kinase WNK2 (Fragment);Serine/threonine-protein kinase WNK3	A0A087WYK2;A6PVV2;F5GWT4;F6UYG0;F8W9F9;H0Y7T5;H0YH68;Q9BYP7;Q9H4A3;Q9Y3S1	10	4	7	Both		2	1	1		2	2	2	3	1		1		2	3
UVRAG	HTSSAIPVPK	UV radiation resistance-associated gene protein	E9PR71;Q9P2Y5	1	0	1	Cancer								1
FAHD2B;FAHD2A	HVAGFTVAH	Fumarylacetoacetate hydrolase domain-containing protein 2B;Fumarylacetoacetate hydrolase domain-containing protein 2A	Q96GK7;Q6P2I3	1	0	1	Cancer								1
GSTK1	GAFGLPITV;GLLEKIATPK;HVDGQTHML	Glutathione S-transferase kappa;Glutathione S-transferase kappa 1	E9PFN5;Q9Y2Q3	3	2	7	Both		1		1			1	2		1	1	1		1	2
EFL1;MTIF2;TUFM	ALAEATVAL;DPKVQINAI;ETFDGVIYGF;HPVGEASIL;HTDCPGHADY;HVDHGKTTL;IGVEHVVVY;KSSAISLHY;KTQEKIWEF;LPPEKELAM;LPSAGEEIL;MPLPEEVTQIL;QDSEMVEL	Elongation factor Tu, mitochondrial;Elongation factor-like GTPase 1;Elongation factor-like GTPase 1 (Fragment);Translation initiation factor IF-2, mitochondrial;Translation initiation factor IF-2, mitochondrial (Fragment)	A0A3B3ITU1;H0YK75;H0YKI9;H3BNU3;H7C213;P46199;P49411;Q7Z2Z2	13	4	7	Both		1		1	1	3	1	2	3		2	2		5	1
TRAF3IP2	HVYSWPKNK	Adapter protein CIKS;Adapter protein CIKS (Fragment)	A0A494C0R7;O43734	1	0	1	Cancer								1
ANKRA2	HVYTPSTTK	Ankyrin repeat family A protein 2	Q9H9E1	1	0	2	Cancer								1							1
MAPKAPK3	ELFSRIQER;HWDEVKEEM	MAP kinase-activated protein kinase 3;MAP kinase-activated protein kinase 3 (Fragment)	C9J8E1;Q16644	2	0	4	Cancer								2			1			1	1
FAM50A;FAM50B	HYDAVEAEL;NTMQQFLQK;RIAEETILK	Protein FAM50A;Protein FAM50A (Fragment);Protein FAM50B	B0S8I6;Q14320;Q9Y247	3	1	4	Both						1		2	1					1	2
C1QTNF5	HYDAVTGKF	Complement C1q tumor necrosis factor-related protein 5	Q9BXJ0	1	0	1	Cancer								1
PPIL2	AEEEPSTSA;AIDEDVLRY;DEDVLRYQF;HYYDGTIFHR	RING-type E3 ubiquitin-protein ligase PPIL2	Q13356	4	2	6	Both					1	1	2	2		1	1		1	1
HADHB	DAFEFHEAF;IDAFEFHEAF;VDYIIFGTVIQEVKTSNVAREA	Trifunctional enzyme subunit beta, mitochondrial;Trifunctional enzyme subunit beta, mitochondrial (Fragment)	B5MD38;C9JE81;C9JEY0;F5GZQ3;P55084	3	0	3	Cancer							1	2							1
RGS2	DELLASKY;EAFDELLASKY;FDELLASKY;IDFQTKTL	Regulator of G-protein signaling 2	P41220	4	0	3	Cancer							1	3				1
BCKDK	IEDEKLVRY	[3-methyl-2-oxobutanoate dehydrogenase [lipoamide]] kinase, mitochondrial;[3-methyl-2-oxobutanoate dehydrogenase [lipoamide]] kinase, mitochondrial (Fragment)	H3BTL2;H3BS02;O14874	1	0	1	Cancer								1
PCDHA11	IEENALLTY	Protocadherin alpha-11	Q9Y5I1	1	0	1	Cancer								1
DKK1	IEETITESF	Dickkopf-related protein 1	O94907	1	0	1	Cancer								1
UFC1	EEYQSLIRY;IEFDIPITY	Ubiquitin-fold modifier-conjugating enzyme 1	Q9Y3C8	2	0	3	Cancer								2		1	1
TP53INP2;TP53INP1	IEHPSMSVY	Tumor protein p53-inducible nuclear protein 2;Tumor protein p53-inducible nuclear protein 1;Tumor protein p53-inducible nuclear protein 2 (Fragment)	Q5JX65;Q8IXH6;Q96A56	1	0	1	Cancer								1
UBE2L3;UBE2L5	IEINFPAEY;YPFKPPKITF	Ubiquitin-conjugating enzyme E2 L3;Ubiquitin-conjugating enzyme E2 L5	A0A1B0GUS4;P68036	2	0	2	Cancer								1							1
GPX4	IEKDLPHYF	Phospholipid hydroperoxide glutathione peroxidase;Glutathione peroxidase	A0A087X2I2;A0A087WT12;P36969	1	0	1	Cancer								1
AIG1	IEMPSHQTY	Androgen-induced gene 1 protein;Androgen-induced gene 1 protein (Fragment)	Q5THU2;Q5T2H3;Q5T2H4;A0A2R8YCJ8;Q9NVV5	1	0	1	Cancer								1
LEMD3	FSVDSPRIY;IENPFGETF	Inner nuclear membrane protein Man1	Q9Y2U8	2	0	3	Cancer							1	1			1
SRL	IENRLENK	Sarcalumenin	Q86TD4	1	0	1	Cancer								1
PEX13	IESIVHAF	Peroxisomal membrane protein PEX13	Q92968	1	0	1	Cancer								1
CSH1;CSH2	IESWLEPV	Chorionic somatomammotropin hormone 1;Chorionic somatomammotropin hormone 2	A0A087WUG6;H0YM39;A6NFB4;P0DML3;P0DML2	1	0	1	Cancer								1
MORC2	IETELIYKY	ATPase MORC2	Q9Y6X9	1	0	1	Cancer								1
S100A14	IETLIKNF	Protein S100-A14	Q9HCY8	1	0	1	Cancer								1
S100A13	IETVVTTF	Protein S100-A13	Q99584	1	0	1	Cancer								1
PRDM5	IFDCQECMK	PR domain zinc finger protein 5	Q9NQX1	1	0	1	Cancer								1
HSPA1A;HSPA1B;HSPA1L;HSPA2;HSPA6;HSPA7;HSPA8	AEAYLGKTV;AMNPTNTVF;DAKLDKSQI;EIAEAYLGY;EVSSMVLTKM;GPKGGSGSGPTIEEVD;GVMTVLIKR;IFDLGGGTF;ILNVSAVDK;ILNVTATDK;IPTKQTQTF;LLDVTPLSLGIETAGGVM;NAVVTVPAY;QASLEIDSL;SEADKKKVL;SEKVQDLLL;TIDDGIFEV;TIEDGIFEV;TLDPVEKAL;TRIPKIQKL;TRIPKVQKL;YAFNMKATV;YPEEVSSMVL	Heat shock 70 kDa protein 1A;Heat shock 70 kDa protein 1B;Heat shock 70 kDa protein 1-like;Heat shock 70 kDa protein 6;Heat shock cognate 71 kDa protein;Heat shock cognate 71 kDa protein (Fragment);Heat shock-related 70 kDa protein 2;HSPA1L (Fragment);Putative heat shock 70 kDa protein 7	A0A0G2JIW1;A8K7Q2;E9PI65;E9PK54;E9PKE3;E9PLF4;E9PM13;E9PN25;E9PN89;E9PNE6;E9PPY6;E9PQK7;E9PQQ4;E9PS65;P0DMV8;P0DMV9;P11142;P17066;P34931;P48741;P54652;Q53FA3;V9GZ37	23	5	9	Both		3	1	2	1	6	2	6	2	1	3	6	1	7	8
SPATS2	IFDLQSNTVL	Spermatogenesis-associated serine-rich protein 2;Spermatogenesis-associated serine-rich protein 2 (Fragment)	F8VX46;F8W128;F8W1X1;F8VX66;F8VZS5;F8VXP9;F8VRH4;F8VXB3;F8VS10;Q86XZ4	1	0	2	Cancer								1						1
EMP2	IHDKNAKFY	Epithelial membrane protein 2	P54851	1	0	1	Cancer								1
NEK1	IISGSFPPV	Serine/threonine-protein kinase Nek1	Q96PY6	1	0	1	Cancer								1
MRLN	ILISTTTPK	Myoregulin	P0DMT0	1	0	1	Cancer								1
ABCC4	ILKDGKMVQK	Multidrug resistance-associated protein 4;Multidrug resistance-associated protein 4 (Fragment)	A0A2R8YDC1;A0A2R8Y6V8;O15439	1	0	1	Cancer								1
TEX49	ILNDRTFSLY	Testis-expressed protein 49	A0A1B0GTD5	1	0	1	Cancer								1
C2CD2	ILNKKLLSR	C2 domain-containing protein 2;C2 domain-containing protein 2 (Fragment)	H7BZB0;Q9Y426	1	0	1	Cancer								1
GCLM	IPDIQAHEW	Glutamate--cysteine ligase regulatory subunit	P48507	1	0	1	Cancer								1
OLA1	IPFSGALEL	Obg-like ATPase 1	J3KQ32;Q9NTK5	1	0	3	Cancer								1						1	1
MPHOSPH9	IPGAEYSIF	M-phase phosphoprotein 9;M-phase phosphoprotein 9 (Fragment)	U3KQJ0;H0YG46;J3KNE4;A0A0A0MTP3;Q99550	1	0	1	Cancer								1
P2RY13	IPSSSTFII	P2Y purinoceptor 13	Q9BPV8	1	0	1	Cancer								1
PSMG2	IPSSWRLLF	Proteasome assembly chaperone 2	Q969U7	1	0	1	Cancer								1
BABAM2	IPYAGETLKW;VHIDLPLFF	BRISC and BRCA1-A complex member 2;BRISC and BRCA1-A complex member 2 (Fragment)	A0A075B7D2;C9J2G0;F8W733;Q9NXR7	2	1	2	Both						1	1	1
KDM1B	DELYEFPEY;DHNEFFAQF;EVPDPTKYFVTR;IQFNPPLSEK	AOF1 protein;Lysine-specific histone demethylase 1B	H0Y6H0;Q08EI0;Q8NB78	4	0	4	Cancer							1	3				1			1
SP2	AIQNPTMINK;IQNPTMINK	SP2 protein;Transcription factor Sp2	Q02086;Q9BRW5	2	1	3	Both				1				2	2						2
POLB	ITDMLTEL	DNA polymerase beta;DNA polymerase;DNA polymerase beta (Fragment)	E5RG65;E5RIJ0;E7EW18;P06746	1	0	1	Cancer								1
TMEM62	ITNPKSLLY	Transmembrane protein 62;Transmembrane protein 62 (Fragment)	H3BVF7;Q0P6H9	1	1	1	Both					1			1
METTL26	ITYGPYAINGK	Methyltransferase-like 26	Q96S19	1	0	1	Cancer								1
NDUFS7	IVAGTLTNK	NADH dehydrogenase [ubiquinone] iron-sulfur protein 7, mitochondrial	F5H5N1;A0A087WXF6;A0A087WTI3;F5GXJ1;O75251	1	0	3	Cancer								1	1						1
NDUFB10	EFIERQHAK;EFIERQHAKNR;IVDRPVTLV;KEVEQFTQV	NADH dehydrogenase [ubiquinone] 1 beta subcomplex subunit 10;NADH dehydrogenase [ubiquinone] 1 beta subcomplex subunit 10 (Fragment)	H3BPJ9;H3BV16;O96000	4	2	3	Both		1				1		3				1	1
ITPA	IVFVTGNAK;QEYFGSLAA	Inosine triphosphate pyrophosphatase	Q9BY32	2	1	4	Both		1					1	1		1		1
TBC1D9;TBC1D9B	APDSEEHSL;ETIKDLPKM;GMYHGDLTEK;HAIATVASL;IVTSVLLLY;KEKEAQKETI;LTEKLKLLY;MPEGEKLVNYY;RTIVTETSF;SPEEFNPKL;YSDKEFAGSY	KIAA0676 protein, isoform CRA_d;TBC1 domain family member 9;TBC1 domain family member 9B	G3V133;Q66K14;Q6ZT07	11	2	6	Both		1			3		2	2	1			2		4	2
CRIP2	IYDRDPEGKVQP	Cysteine-rich protein 2;Cysteine-rich protein 2 (Fragment)	H0YHD8;H0YFA4;P52943	1	0	1	Cancer								1
SLC5A10;SLC5A11	IYTDALQTL	Sodium/glucose cotransporter 5;Sodium/myo-inositol cotransporter 2	A0PJK1;Q8WWX8	1	0	1	Cancer								1
FOXA1	KAYEQALQY	Hepatocyte nuclear factor 3-alpha	P55317	1	0	1	Cancer								1
SERPINE1	KDEISTTDAIFVQRDL	Plasminogen activator inhibitor 1	P05121	1	0	1	Cancer								1
PKDREJ	KDSRTAFSDK	Polycystic kidney disease and receptor for egg jelly-related protein	Q9NTG1	1	0	1	Cancer								1
TBC1D15	ALDSSSILY;KEERTQLQK	TBC1 domain family member 15;TBC1 domain family member 15 (Fragment)	C9JA93;F8WCB5;F8WDJ1;F8WF35;Q8TC07	2	1	4	Both					1		1						1	1	1
ZGRF1	KERSSAYSKN	Protein ZGRF1;Protein ZGRF1 (Fragment)	I3L0G6;Q86YA3	1	0	1	Cancer								1
RPL7L1	KAYQALKATQAK;KIFSGVFVK;TVIEEHLGKF	60S ribosomal protein L7-like 1;60S ribosomal protein L7-like 1 (Fragment)	Q6DKI1;R4GMU7	3	0	5	Cancer							1	2	1			1			1
PKN1;PKN2	EYKNTNEMF;FSEPRAIFY;KIFSKQQGK;LYLEPQGTLF;SEVSTVLKL;SPDLGAVEL;SSFMSRTSK;TESNQKLGL;TTDKKSLAY	Protein kinase N2, isoform CRA_b;Serine/threonine-protein kinase N1;Serine/threonine-protein kinase N1 (Fragment);Serine/threonine-protein kinase N2;Serine/threonine-protein kinase N2 (Fragment)	B1AL79;H0Y5V5;K7EL10;K7EM57;Q16512;Q16513	9	2	6	Both					1	2	2	2	1			3	1	5
TGOLN2	KIIAFVLEGK;TGPEEGSPP	Trans-Golgi network integral membrane protein 2	O43493	2	0	2	Cancer							1	1
LMO1;LMO3	KIKDRYLLK	Rhombotin-1;LIM domain only protein 3;LIM domain only protein 3 (Fragment)	A0A087WYA2;E9PK83;Q8TAP4;P25800;F5H4K9;Q05D86;F6TDU8;C9JE61;F5H4T0;F5GZR3;F5H655;F5H2N9;F5GYZ6;F5H3S4	1	0	1	Cancer								1
SPATA16	KIRADKIEK	Spermatogenesis-associated protein 16;Spermatogenesis-associated protein 16 (Fragment)	A0A494BZR9;Q9BXB7	1	0	1	Cancer								1
MYLK2	KLAAKVIKK	Myosin light chain kinase 2, skeletal/cardiac muscle	Q9H1R3	1	0	1	Cancer								1
PDE3A;PDE3B	EVSLDLILV;KLADINGPAK;SLVSKISAVQ	cGMP-inhibited 3',5'-cyclic phosphodiesterase A;cGMP-inhibited 3',5'-cyclic phosphodiesterase B	Q13370;Q14432	3	1	5	Both		1					1	1		1		1			1
TCTN1	KLDIPTAAK	Tectonic-1	B4DIB9;E9PNE4;A0A0A0MRU7;A0A087X1J4;Q2MV58	1	0	1	Cancer								1
ESCO1	KLDSQVSPK	N-acetyltransferase ESCO1	Q5FWF5	1	0	1	Cancer								1
TPT1;TPT1P8	EVEGKMVSR;GEGTESTVI;KLEEQRPERVK;NPDGMVALL	Putative translationally-controlled tumor protein-like protein TPT1P8;Translationally-controlled tumor protein;Translationally-controlled tumor protein (Fragment)	A0A0B4J2C3;E9PJF7;H0YCX0;J3KPG2;P13693;Q5W0H4;Q9HAU6	4	0	4	Cancer								2				1		1	1
BAHCC1;TNRC18	AEEEAAVVA;IPMDDKLLY;KLFYKAIVR;LDLEEPAQEK;REAEARSSF;TPAGVYTVF	BAH and coiled-coil domain-containing protein 1;Trinucleotide repeat-containing gene 18 protein	F8WBW8;H9KVB4;O15417;Q9P281	6	0	4	Cancer							1	2			1				2
NDUFA4	KLGPNDQYK	Cytochrome c oxidase subunit NDUFA4	O00483	1	0	1	Cancer								1
TFCP2;UBP1	HDETLTYL;IPLHQINQVY;KLHDETLTY;LHDETLTYL;PADYGDSLA;RKLGELPEI	Alpha-globin transcription factor CP2;Alpha-globin transcription factor CP2 (Fragment);Upstream-binding protein 1;Upstream-binding protein 1 (Fragment)	C9JWL3;F8VWL0;F8VX55;Q12800;Q9NZI7	6	0	5	Cancer							2	1				2		1	1
CANX;CLGN	APVPTGEVY;DTDDEIAKY;DYKLHFIFR;FTDKKTHLY;GTLSGWILSK;IEDPEDRKP;KLHFIFRHK;NPDNSFEIL;REIEDPEDRKP	Calmegin;Calnexin;Calnexin (Fragment)	D6RAQ8;D6RAU8;D6RB85;D6RD16;D6RDP7;D6RFL1;D6RGY2;D6RHJ3;H0Y9H1;H0Y9Q7;O14967;P27824	9	1	5	Both					2		3	3	1					3	2
CFAP36	KLKEEVINK	Cilia- and flagella-associated protein 36	B5MCA1;Q96G28	1	0	2	Cancer								1							1
BABAM1	KLLAHPLQR	BRISC and BRCA1-A complex member 1	J3KQS6;Q9NWV8	1	0	2	Cancer								1							1
SMARCD2;SMARCD3	AIKKPLTQK;ETIESINQL;KLDQTIARK;KLLDDPSKQK;MLDHQPPQY;RRQELEQVL;VEVDDPLKAQM	SMARCD2 protein;SWI/SNF-related matrix-associated actin-dependent regulator of chromatin subfamily D member 2;SWI/SNF-related matrix-associated actin-dependent regulator of chromatin subfamily D member 2 (Fragment);SWI/SNF-related matrix-associated actin-dependent regulator of chromatin subfamily D member 3	B9EGA3;J3KMX2;J3QWB6;Q6STE5;Q92925	7	3	6	Both				1	1	1	1	3	1		1	1			3
HBEGF	KLLPSVVLK	Proheparin-binding EGF-like growth factor	Q99075	1	1	2	Both				1				1							1
TRIM16;4	KLNENAISRL	Tripartite motif-containing protein 16;Tripartite motif-containing protein 16 (Fragment);Uncharacterized protein	J3QL38;K7EL43;B3KP96;H0Y626;O95361	1	0	1	Cancer								1
AMIGO2	KLNTLILRH	Amphoterin-induced protein 2	Q86SJ2	1	0	1	Cancer								1
CNN1;CNN3	CAAPTEPVI;FENGNMTQV;KLQPGSVKK;KTKGFHTTI;NHTQVQSTL;YPDEYHGEY	Calponin;Calponin (Fragment);Calponin-1;Calponin-1 (Fragment);Calponin-3;Transgelin (Fragment)	B7Z7E1;E9PDU6;K7ENC5;K7EQ72;K7ERK4;K7ESJ2;P51911;Q15417	6	2	5	Both			1	1							1	1	2	2	1
EHBP1	KLVDLKLK	EH domain-binding protein 1;EH domain-binding protein 1 (Fragment)	H7BZ98;Q8NDI1	1	0	1	Cancer								1
HPSE	KLYGPDVGQPR	Heparanase	Q9Y251	1	0	1	Cancer								1
CFAP20	EVQVLDDKNVR;KLYLPVQNK	Cilia- and flagella-associated protein 20	Q9Y6A4	2	0	1	Cancer								2
GRIN2A	ANSRPRQLW;KLYSKHFTLK	Glutamate receptor ionotropic, NMDA 2A	F5GZ52;Q12879	2	0	1	Cancer								2
TIMM9	KPEEQNEALA	Mitochondrial import inner membrane translocase subunit Tim9	A0A1W2PQS5	1	0	2	Cancer								1				1
PYROXD2	KQIAQFSQK;SSLDPTLAP	Pyridine nucleotide-disulfide oxidoreductase domain-containing protein 2	Q8N2H3	2	0	2	Cancer							1	1
WWC2	KQWRGEQEK;SHDASLHQF	Protein WWC2	Q6AWC2	2	1	4	Both		1					1	1				1			1
FNBP4	AEIDAITAP;KSGPVIAK;KSGPVIAKR	Formin-binding protein 4	Q8N3X1	3	1	3	Both		1					1	2							2
MED27	DVISRIDRM;KSNYQVFQK	Mediator of RNA polymerase II transcription subunit 27	A0A494C0K7;A0A494C0P0;Q6P2C8	2	0	3	Cancer							1	1				1
AKR1B10	KTAAQVLIRF	Aldo-keto reductase family 1 member B10	O60218	1	0	1	Cancer								1
LNPK	KTAKLILERF	Endoplasmic reticulum junction formation protein lunapark	Q9C0E8	1	0	1	Cancer															1
VAPB	KTETPIVSK	Vesicle-associated membrane protein-associated protein B/C	O95292	1	0	2	Cancer									1						1
TBC1D10C	KTFHGLLTR	Carabin	Q8IV04	1	0	1	Cancer								1
ZBTB40	EVMEKLVKR;KTFPNTIEH	Zinc finger and BTB domain-containing protein 40;Zinc finger and BTB domain-containing protein 40 (Fragment)	A0A3B3IRZ6;F8WAI8;Q9NUA8	2	0	1	Cancer								2
FHDC1	KTIPEEQVRGK	FH2 domain-containing protein 1	Q9C0D6	1	0	1	Cancer								1
IFRD1	ATDDITELY;KTLGPILKK	Interferon-related developmental regulator 1;Interferon-related developmental regulator 1 (Fragment)	C9JNM6;O00458	2	1	4	Both					1		1	1					1	1
ABHD11	KTNFNSIAK	Protein ABHD11;Protein ABHD11 (Fragment)	H0YC52;H7C396;C9J7Q4;H7BZ58;Q8NFV4	1	0	1	Cancer								1
ZNF334	KTNSEVIVAK	Zinc finger protein 334;Zinc finger protein 334, isoform CRA_b;Zinc finger protein 334, isoform CRA_a;Zinc finger protein 334 (Fragment)	M0R3E1;A0A0B4J1Y0;A0A087X1P4;Q8N3P8;Q9HCZ1	1	0	1	Cancer								1
ABCB11	GLSVSISPG;KTVQVALDKA	Bile salt export pump;Bile salt export pump (Fragment)	A0A3B3IS78;O95342;Q53S60	2	3	7	Both			1	1	1		1	2	1			1	1	1	1
RBM43	GSYESTLKK;KVAENVIRQK	RNA-binding protein 43	Q6ZSC3	2	0	2	Cancer								2							2
MYL2	KVFDPEGKGVLK	Myosin regulatory light chain 2, ventricular/cardiac muscle isoform	G3V1V8;P10916	1	1	2	Both				1				1							1
C9orf116	KVFYPNSNK	UPF0691 protein C9orf116	Q5BN46	1	0	1	Cancer								1
TXN	KVGEFSGANK	Thioredoxin	P10599	1	1	1	Both				1				1
SCNN1G	KVGGSIIHK	Amiloride-sensitive sodium channel subunit gamma	P51170	1	0	2	Cancer								1							1
SLC34A2	KVITKPFTK	Sodium-dependent phosphate transport protein 2B	O95436	1	0	1	Cancer								1
HECTD4	DHAAPEITL;EVIALLHSL;KVLSRALMY	Probable E3 ubiquitin-protein ligase HECTD4;Probable E3 ubiquitin-protein ligase HECTD4 (Fragment)	A0A494C150;F8VWT9;J3KPF0;Q9Y4D8	3	1	3	Both		1					2	1				2
MDFIC	KLSAPVSQK;KVNAVFSQK	MyoD family inhibitor domain-containing protein;MyoD family inhibitor domain-containing protein (Fragment)	A0A087X231;C9J784;H7BZY3;H7C4B9;J3KN13;Q9P1T7	2	0	2	Cancer								2							1
SEPT14;SEPT7;SEPTIN7	DYLNAESRVNR;DYLNAESRVNRR;EENKLVKKI;KVKEKVQKL;KVNIIPLIAK;LNAESRVNR;MEQVFEMKV;VTYNGVDNNK;YIDSKFEDY	Septin 7;Septin 7 (Fragment);Septin-14;Septin-7	A0A0U1RRE1;A0A0U1RRH9;A0A0U1RRM2;E7EPK1;E7ES33;G3V1Q4;Q16181;Q5JXL7;Q6ZU15	9	3	8	Both				1	1	1	1	5	2	2	1	1		2	1
SAMD12	KVPDQKGTPK	Sterile alpha motif domain-containing protein 12	F8VYB8;B8ZZB7;H0YEJ0;Q8N8I0	1	0	1	Cancer								1
EBNA1BP2	KVQTEVLQK	Probable rRNA-processing protein EBP2;EBNA1 binding protein 2, isoform CRA_d	H7C2Q8;Q99848	1	0	2	Cancer								1							1
KHNYN	KVRESHFLQK	Protein KHNYN	O15037	1	0	1	Cancer								1
PLCE1	KVSDINISK	1-phosphatidylinositol 4,5-bisphosphate phosphodiesterase epsilon-1	Q9P212	1	0	1	Cancer								1
SMIM20	EYKKEQAINR;KVWSDPFGRK	Small integral membrane protein 20	E5RH91;Q8N5G0	2	0	1	Cancer								2
PREPL	LADDSVRSL	Prolyl endopeptidase-like	Q4J6C6	1	0	1	Cancer									1
NSFL1C	LADESQTL	NSFL1 cofactor p47	Q9UNZ2	1	0	2	Cancer								1							1
RIMS2	LDELELSN	Regulating synaptic membrane exocytosis protein 2;Regulating synaptic membrane exocytosis protein 2 (Fragment)	E5RI36;D6RA03;Q9UQ26	1	2	4	Both			1		1			1			1	1		1
LRFN5	LDVTSNKLQ	Leucine-rich repeat and fibronectin type-III domain-containing protein 5	G3V4N1;G3V364;Q96NI6	1	0	1	Cancer								1
SUSD2	LEAALTDLR	Sushi domain-containing protein 2	Q9UGT4	1	0	2	Cancer								1	1
COPS7A;COPS7B	AESDFASTF;ALATLIHQV;GELLDMPNV;LEAPGVYVF	COP9 constitutive photomorphogenic homolog subunit 7A (Arabidopsis), isoform CRA_b;COP9 signalosome complex subunit 7a;COP9 signalosome complex subunit 7a (Fragment);COP9 signalosome complex subunit 7b;COP9 signalosome complex subunit 7b (Fragment)	A0A087X1P5;F5GXT7;F5GYF7;F5H248;F5H3M6;F5H4U8;F5H4Z0;F5H7C6;G3XAP1;J3KQ41;J3KQV6;J3QT43;J3QT50;J3QT66;J3QT67;J3QT69;J3QT95;Q9H9Q2;Q9UBW8	4	1	4	Both			1					1	2		1	1
TJAP1	LEELNERYR	Tight junction-associated protein 1;Tight junction-associated protein 1 (Fragment)	E2QRK7;H0Y4D6;Q5JTD0	1	0	1	Cancer								1
MAPRE2;MAPRE3	HESENSPVI;KLIGTAVPQRTSPTGPK;LEHEYIHNF	Microtubule-associated protein RP/EB family member 2;Microtubule-associated protein RP/EB family member 2 (Fragment);Microtubule-associated protein RP/EB family member 3;Microtubule-associated protein RP/EB family member 3 (Fragment)	C9JB30;K7EL66;K7ENB3;K7ERD8;M0QX52;Q15555;Q9UPY8	3	0	4	Cancer								2		1	1	1
FGFR1OP2;SIKE1	DHDDAAESL;EHDAAAESL;LELIMSKY;QENRQIREL;VTNSDLSLR	FGFR1 oncogene partner 2;FGFR1 oncogene partner 2 (Fragment);Suppressor of IKBKE 1	F5GX47;Q9BRV8;Q9NVK5	5	2	4	Both			1			1	2	1	1			1
BID	DIIRNIARH;LEQLLQAY	BH3-interacting domain death agonist	P55957	2	0	3	Cancer	+						1	1				1
AKAP13;BRD7	AEHNSSALL;AVDSKVASY;DETATTPIF;ETATTPIFANR;ETFGGFDSHQM;FEQQMVEKL;IYELMQTEF;KPFTNKDAY;KRQEVIYEL;LEREQEQL;LPEDEGHTRTL;QEEQRTPPP;QFFQRILER;QHNQSVNYF;RTFSYIKNK;SAISSPLTK;SPLTKSISL;TPGDIVSTY	A-kinase anchor protein 13;A-kinase anchor protein 13 (Fragment);Bromodomain-containing protein 7;Bromodomain-containing protein 7 (Fragment)	A0A087WTD7;A0A087WX73;A0A087WY36;A0A087WYS7;A8MYJ1;H0YLH1;H0YMW2;I3L4V5;Q12802;Q9NPI1	18	4	6	Both			1	1	1	3	2	3	1			2		3	4
GPR143	LGSGGLRLA	G-protein coupled receptor 143	P51810	1	0	1	Cancer								1
SLC18B1	FPNNVATVL;LIAFVINSL	MFS-type transporter SLC18B1	A0A3B3IT67;A0A3B3ITL9;A0A3B3IU67;Q6NT16	2	0	4	Cancer								2	1					1	1
ARHGAP19	FHSNDVATL;LIDLPGTEL	Rho GTPase-activating protein 19;Rho GTPase-activating protein 19 (Fragment)	Q14CB8;R4GMS4;R4GNI4	2	1	3	Both		1					1	1				1
LPIN3	LLDDPNLVV	Phosphatidate phosphatase LPIN3	Q9BQK8	1	0	2	Cancer								1							1
ERAL1	LLDTPGII	GTPase Era, mitochondrial;GTPase Era, mitochondrial (Fragment)	J3QSB2;J3QRV9;O75616	1	0	2	Cancer								1							1
ENPEP	LLEDVLPV	Glutamyl aminopeptidase	Q07075	1	0	1	Cancer								1
POLR2L	AHVDLIEKL;DLIEKLLNY;IEKLLNYAP;KLLNYAPLEK;LLNYAPLEK	DNA-directed RNA polymerases I, II, and III subunit RPABC5	P62875	5	2	5	Both		2		1			3	2				2		1	1
JUNB;JUND	DTQERIKAER;FAGGHPAQL;GSDTGASL;LLREQVAQLK;LPQHQVPAY;NHVTPPNVSL;QPFYHDDSY;THVSNGCQL;TPFYGDEAL;YPTTTISY	Transcription factor jun-B;Transcription factor jun-D;Transcription factor jun-D (Fragment)	P17275;P17535;U3KPR5	10	1	5	Both			1					2	1			1		1	4
ZNF343	LLSLDGVSL	Zinc finger protein 343	A0A087WZQ2	1	0	1	Cancer								1
MTRR	LLYATQQGQAK;VHDALVQII	Methionine synthase reductase;Methionine synthase reductase (Fragment)	A0A3P9MRF3;D6RAY3;D6RAZ2;D6RF21;D6RGC7;D6RIS8;H0Y8S9;H0Y963;H0Y9Q0;Q9UBK8	2	0	2	Cancer							1								1
SLC35B2	LLYGHTVTV	Adenosine 3'-phospho 5'-phosphosulfate transporter 1	Q8TB61	1	0	2	Cancer								1							1
PIK3C2G	LNDELLEY	Phosphatidylinositol 4-phosphate 3-kinase C2 domain-containing subunit gamma	F5H369;O75747	1	0	1	Cancer								1
CCDC73	LNEKINEEITHI	Coiled-coil domain-containing protein 73	Q6ZRK6	1	0	1	Cancer								1
SS18;SS18L1	GEITPAAI;LPAPPTQNM;MPQGGGQHY;YPQGQGQQY	Calcium-responsive transactivator;Calcium-responsive transactivator (Fragment);Protein SSXT;Protein SSXT (Fragment)	B4DLD3;F5GWN1;J3KRP6;J3KT22;J3KT74;J3QLJ7;J3QQM2;J3QQW2;J3QQX5;J3QS72;O75177;Q15532;Q9BR54;X6R3J2	4	0	4	Cancer								1				1		1	3
AHRR;PDCD6	FHDILIRKF;KYITDWQNVF;LPDQSFLW;SEFTGVWKY	Aryl hydrocarbon receptor repressor;HCG1985580, isoform CRA_c;PDCD6 protein;Programmed cell death protein 6;Programmed cell death protein 6 (Fragment)	A0A024QZ42;A0A087WZ38;D6RA21;E7EPW6;H0Y9X3;O75340;Q86W51	4	1	5	Both						1	1	2				2		1	1
SLIRP	LPFDKETGF	SRA stem-loop-interacting RNA-binding protein, mitochondrial;SRA stem-loop-interacting RNA-binding protein, mitochondrial (Fragment)	H0YJW7;A0A087WUN7;H0YJ40;G3V4X6;G3V2S9;Q9GZT3	1	0	3	Cancer								1						1	1
WNT8A	LPSAEAELIF	Protein Wnt-8a;Protein Wnt;Protein Wnt (Fragment)	D6RF47;D6RF94;Q9H1J5	1	0	1	Cancer	+							1
ERICH1	LPSDVSILY	Glutamate-rich protein 1;Glutamate-rich protein 1 (Fragment)	H0YBT6;H0YB25;E5RHA3;Q86X53	1	0	2	Cancer								1							1
INO80C	LPSDVVTGY	INO80 complex subunit C;Chromosome 18 open reading frame 37, isoform CRA_a	K7EQ79;K7EIY8;Q6PI98	1	0	2	Cancer								1							1
TIFA	LPSSEVVKF	TRAF-interacting protein with FHA domain-containing protein A	Q96CG3	1	0	2	Cancer								1							1
NCKAP1	DESIIMSSF;KTISQAVNK;LPTENELTF;VQIDITRVF	Nck-associated protein 1	Q9Y2A7	4	1	5	Both		1					1	3				1		1	2
SBNO1;SBNO2	AEELGHTETY;AEGVFLSLI;DAFAKSLAL;DAQADPAAL;DYNNIGKFLNR;DYVPSKSKIGK;EAFEGVIVF;EEIPLAPAF;EELGHTETY;EEMGHAETY;EEVLLSQSY;EVLLPSGQR;EYMPIKLKI;GPYDGFYLSY;HPDAVVETSSL;LPWSADRAIQQF;RPFAGFEDF;SEGVLFATY;TPFRNFEEF;YVFLISEL	Protein strawberry notch homolog 1;Protein strawberry notch homolog 2	A3KN83;K7ES28;Q9Y2G9	20	1	7	Both						1	1	9	2		3	2		2	4
EFCAB7	LSDIFEVI	EF-hand calcium-binding domain-containing protein 7	A8K855	1	1	3	Both						1		1						1	1
ZBTB10	HHVSTEHKL;LSSSRDQKI	Zinc finger and BTB domain-containing protein 10	Q96DT7	2	0	3	Cancer							1	1				1
MPV17L2	LSYLKYRSP	Mpv17-like protein 2	Q567V2	1	0	1	Cancer								1
ATP10B	LTGEIVVY	Probable phospholipid-transporting ATPase VB;ATP10B protein (Fragment);Phospholipid-transporting ATPase	Q2YDW8;A0A2R8YDI5;O94823	1	0	1	Cancer								1
UNC5CL	LTNEIIVTM	UNC5C-like protein	Q8IV45	1	0	1	Cancer										1
RBP3	DLESLASQL;LVDRVPTL	Retinol-binding protein 3	P10745	2	0	1	Cancer								2
PITPNM3	LVHDPLRQK	Membrane-associated phosphatidylinositol transfer protein 3;Membrane-associated phosphatidylinositol transfer protein 3 (Fragment)	I3L1K1;Q9BZ71	1	0	1	Cancer								1
ERCC4	LYDFIHTSF	DNA repair endonuclease XPF	Q92889	1	1	2	Both						1		1							1
SDR16C5	MEKSFDVNF	Epidermal retinol dehydrogenase 2	G3V145;Q8N3Y7	1	0	1	Cancer								1
ILF3;STRBP	AAKPHNPGF;FANDDRHVM;FPDTPLAL;FVNDDRHVM;GSYGYGGNSATAGY;GVMRVGLVAK;KEPPLSLTI;MEVEVDGQKF;NALMRLNQL;TEAKPAVVA;YNPGSHGGYGGGSGGGS	Interleukin enhancer-binding factor 3;Interleukin enhancer-binding factor 3 (Fragment);Spermatid perinuclear RNA-binding protein;Spermatid perinuclear RNA-binding protein (Fragment)	E9PKQ0;K7EJ09;K7EKJ9;K7EKY0;K7ELV3;K7EM82;K7EMZ8;K7ENK6;K7EPG3;K7EQR9;K7ER69;K7ERM6;Q12906;Q5JPA5;Q96SI9	11	1	8	Both						2	1	1	1		1	2	1	5	4
DEDD	MFDIVGTHL;YLEETSIRY	Death effector domain containing, isoform CRA_b;Death effector domain-containing protein;Death effector domain-containing protein (Fragment)	B1AQP5;O75618;V9GY27	2	2	5	Both					1	1	1	1					1	2	1
CCDC92	DEGPLDVSM;MPDPTPFLL	Coiled-coil domain-containing protein 92;Coiled-coil domain-containing protein 92 (Fragment)	F5H285;F5H7P8;Q53HC0	2	1	3	Both						1		2						1	1
COA1	MPLGARILF	Cytochrome c oxidase assembly factor 1 homolog;Cytochrome c oxidase assembly factor 1 homolog (Fragment)	F8WBS2;F2Z2J3;C9J6J1;C9JA07;Q9GZY4	1	0	1	Cancer								1
HPGD	MPVAQQPVY	15-hydroxyprostaglandin dehydrogenase [NAD(+)];15-hydroxyprostaglandin dehydrogenase [NAD(+)] (Fragment)	D6RA66;D6RA83;P15428	1	0	2	Cancer								1							1
ING4;ING5	KEFGDDKVQL;KEYSDDKVQL;MPVDPNEPTY	Inhibitor of growth protein 4;Inhibitor of growth protein 4 (Fragment);Inhibitor of growth protein 5	A0A1B0GW41;E9PEN0;Q8WYH8;Q9UNL4;R4GNG1	3	0	3	Cancer								1	2						1
PTPRO	DEMQDVMHF;NAAESILQF	Receptor-type tyrosine-protein phosphatase O;Receptor-type tyrosine-protein phosphatase O (Fragment)	H0YH60;Q16827	2	0	1	Cancer								2
CRMP1;DPYS;DPYSL3	AEYNIFEGM;GELGAIAQV;KEIGAIAQV;MPYKGMTTV;MPYKGMTTVDDF;NAAKIFNLY;VHAENGDLI;WHHAAHHVM	Dihydropyrimidinase;Dihydropyrimidinase (Fragment);Dihydropyrimidinase-related protein 1;Dihydropyrimidinase-related protein 3;Dihydropyrimidinase-related protein 3 (Fragment)	D6RF19;E5RG28;E9PD68;H0YBT4;Q14117;Q14194;Q14195	8	2	5	Both		1		1			1	1				5	1		2
JRK;JRKL	KAKDFYEQM;LPEDSKAVL;NADETGLFW;SSSDSTSLLAK	Jerky protein homolog;Jerky protein homolog-like	O75564;Q9Y4A0	4	0	4	Cancer								1				1		1	1
NUP62;NUP62CL	AENIDAQLKRM;AESIDAQLK;IENGEKITSL;NAHMDSLQW	Nuclear pore glycoprotein p62;Nucleoporin-62 C-terminal-like protein (Fragment)	H0Y6X7;M0QXN5;P37198	4	0	3	Cancer								1	2			1
RIPK4	GEFTGWEKV;LAKQPGVSV;NANPNLSNR	Receptor-interacting serine/threonine-protein kinase 4	P57078	3	1	3	Both		1					1	1		1
EML2	NEAVLVATF;SHDNLVYVY	Echinoderm microtubule-associated protein-like 2;Echinoderm microtubule-associated protein-like 2 (Fragment)	A0A0C4DGQ7;C9JRL6;K7EIK7;K7EKG3;K7EKU5;O95834	2	1	3	Both		1					1	1				1
CEACAM1;CEACAM3;CEACAM6	DGNSLIVGY;NEEATGQFHVY	Carcinoembryonic antigen-related cell adhesion molecule 1;Carcinoembryonic antigen-related cell adhesion molecule 3;Carcinoembryonic antigen-related cell adhesion molecule 3 (Fragment);Carcinoembryonic antigen-related cell adhesion molecule 6	M0QXR5;P13688;P40198;P40199	2	0	1	Cancer								2
ARL13B	NEFGLVENY	ADP-ribosylation factor-like protein 13B	Q3SXY8	1	0	2	Cancer								1			1
PTPRG;PTPRZ1	EYGNIIVTL;LYSNNQHGF;NEFIITQH;SEDSRFITV;SISSTKGMFP	Receptor-type tyrosine-protein phosphatase gamma;Receptor-type tyrosine-protein phosphatase zeta;Receptor-type tyrosine-protein phosphatase zeta (Fragment)	A0A494C036;A0A494C055;A0A494C087;A0A494C0U4;A0A494C1B4;A0A494C1F0;A0A494C1H9;A0A494C1J5;A0A494C1R4;P23470;P23471	5	1	4	Both						1	1	2				1		2
RELCH	NEFLLKNNY	RAB11-binding protein RELCH	A0A075B785;A0A2R8Y566;Q9P260	1	0	1	Cancer								1
ACBD6	NEGQTALHY	Acyl-CoA-binding domain-containing protein 6	Q9BR61	1	0	2	Cancer								1			1
ANKRD44;ANKRD52	AEIDEPNAF;ASIFVKDNVTK;AYVGDVPIL;DENGHTPAL;ELKEKEATL;HHQALEVLL;IHSMFPLHL;KIQDESLINEK;MGHLDVVAL;NEHVLSAGF;RVNAKDNMW;TLAETLVNL;VYGNTALHI	Serine/threonine-protein phosphatase 6 regulatory ankyrin repeat subunit B;Serine/threonine-protein phosphatase 6 regulatory ankyrin repeat subunit B (Fragment);Serine/threonine-protein phosphatase 6 regulatory ankyrin repeat subunit C	A0A2R8Y7Y4;C9JY51;H7C209;H7C4A0;Q8N8A2;Q8NB46	13	2	7	Both			2			2	1	2	1		1	2		3	2
BTG3	NEIAAVVF	Protein BTG3;Protein BTG3 (Fragment)	C9JLA2;A0A0G2JRT0;A0A0G2JRS5;Q14201	1	0	1	Cancer								1
TRIM2	NEIIITDF	Tripartite motif-containing protein 2;Tripartite motif-containing protein 2 (Fragment)	A0A0J9YY97;Q9C040	1	0	1	Cancer								1
PTAFR	NEIKIFMV;VAFLGVITY	Platelet-activating factor receptor	P25105	2	0	3	Cancer							1	1				1
TNFRSF10B	NEIKVAKA	Tumor necrosis factor receptor superfamily member 10B	O14763	1	0	1	Cancer								1
MINPP1	NEKVLPLAY	Multiple inositol polyphosphate phosphatase 1	Q9UNW1	1	0	1	Cancer								1
FZR1	DIRTPPLQSER;NELVSTHGY;TSDNGKDGLAY	Fizzy-related protein homolog	K7EQT1;Q9UM11	3	1	6	Both					1		1	2	1		1		1	1
CSGALNACT2	NENDFVEGY	Chondroitin sulfate N-acetylgalactosaminyltransferase 2	Q8N6G5	1	0	1	Cancer								1
RBM4;RBM4B	AEQTMSHLP;FTEQYNEQY;LPQVQNTAM;LTEQYNEQY;NEQYGAVRTPY;VRTPYTMSY;VTAASTSYY	RNA-binding protein 4;RNA-binding protein 4 (Fragment);RNA-binding protein 4B	E9PB51;Q9BQ04;Q9BWF3	7	3	5	Both			1		4	1	3	1					2	3	2
FAM111A	NETRSIIEF	Protein FAM111A	Q96PZ2	1	0	1	Cancer								1
PRDM15	NEVDGEYRY	PR domain zinc finger protein 15	Q4W8S1;E7ER26;P57071	1	0	1	Cancer								1
SDHB	NEVDSTLTF	Succinate dehydrogenase [ubiquinone] iron-sulfur subunit, mitochondrial;Succinate dehydrogenase [ubiquinone] iron-sulfur subunit, mitochondrial (Fragment)	A0A087WXX8;A0A087WWT1;P21912	1	0	1	Cancer								1
RSPH3	NEVEKTMEY	Radial spoke head protein 3 homolog	A0A0C4DG29;A0A0C4DFU3;Q86UC2	1	0	1	Cancer								1
RCVRN	NEVLEIVM	Recoverin	P35243	1	0	1	Cancer								1
LRRC59	IYDNAVQGL;KEYDALKAA;NEVPVKEL	Leucine-rich repeat-containing protein 59	I3L223;Q96AG4	3	1	3	Both		1						2						1	1
C2orf74	NEYPTPRSY	Uncharacterized protein C2orf74	C9JBF1;A0A087X1C3;A8MZ97	1	0	1	Cancer								1
PTGES3	NFDRFSEM	Prostaglandin E synthase 3	B4DDC6;A0A087WYT3;Q15185	1	0	2	Cancer								1						1
FBXO8	NPDEGVNYF	F-box only protein 8;F-box only protein 8 (Fragment)	D6RIC0;Q9NRD0	1	0	1	Cancer								1
FOLR1;FOLR2	GEMLHGTGGLL;GEMLHGTGGLLL;LPAATEVQL;MHVNAGEML;NPNEEVARF;NPNEEVARFY	Folate receptor alpha;Folate receptor beta	A0A087WWY2;J3KQP4;J3KR13;P14207;P15328	6	0	5	Cancer								2	2			2		1	2
WDR83OS	DTKQMMSSF;NPQPMTPPW	Protein Asterix;Protein Asterix (Fragment);PTD008 protein, isoform CRA_b	A0A0A0MQS5;M0R1D5;Q9Y284	2	0	4	Cancer							1	1			1	1
CNK3/IPCEF1;CNKSR3	NPTGVVLLL	CNK3/IPCEF1 fusion protein;Connector enhancer of kinase suppressor of ras 3;Connector enhancer of kinase suppressor of ras 3 (Fragment)	G9CGD6;Q5T4Y8;Q6P9H4	1	0	1	Cancer								1
XAGE1A	NQQLKVGILHLGSRQK	X antigen family member 1	Q9HD64	1	0	1	Cancer								1
SLC11A2	NTMDADSLVSR	Natural resistance-associated macrophage protein 2;Natural resistance-associated macrophage protein 2 (Fragment)	H0YIV3;P49281	1	0	1	Cancer								1
ZHX1	NTSTSIVNR	Zinc fingers and homeoboxes protein 1	Q9UKY1	1	0	1	Cancer								1
UCHL1	NVDGHLYEL	Ubiquitin carboxyl-terminal hydrolase isozyme L1;Ubiquitin carboxyl-terminal hydrolase	D6RE83;D6R956;P09936	1	0	1	Cancer								1
EYA2	NVGGLIGTPK	Eyes absent homolog 2;Eyes absent homolog	E7ETN2;O00167	1	0	1	Cancer								1
RAB11FIP3	DEFDDFVTY;LTDEAFEFY;PDEFDDFVTY	Rab11 family-interacting protein 3;Rab11 family-interacting protein 3 (Fragment)	A0A0J9YWV4;A0A0J9YXZ3;H0Y7F9;O75154;X6RFI8	3	0	2	Cancer							1	2
ZFP64	PEFVFEHGY	Zinc finger protein 64	Q9NTW7	1	0	1	Cancer								1
ZNF443;ZNF823	KTFYHHTSF;PFYSSYLRHE	Zinc finger protein 443;Zinc finger protein 823;Zinc finger protein 823 (Fragment)	C9J2N8;K7EN93;P16415;Q9Y2A4	2	0	2	Cancer								1			1
SERTAD4-AS1	PGGEDAYSL	Putative uncharacterized protein SERTAD4-AS1	Q5TG53	1	0	1	Cancer								1
COL9A3	PGPPGPKGAP	Collagen alpha-3(IX) chain;Collagen alpha-3(IX) chain (Fragment)	Q4VXW1;Q14050	1	0	1	Cancer								1
ADAMTS17	PQDSLFIW	A disintegrin and metalloproteinase with thrombospondin motifs 17;A disintegrin and metalloproteinase with thrombospondin motifs 17 (Fragment)	H3BRA9;Q8TE56	1	0	1	Cancer								1
PRRX1;PRRX2	KNASLLKSY;QALERVFER	Paired mesoderm homeobox protein 1;Paired mesoderm homeobox protein 2	G3V2N3;P54821;Q99811	2	0	2	Cancer								1				1
GPIHBP1	QDPTGKGAGGPR	Glycosylphosphatidylinositol-anchored high density lipoprotein-binding protein 1	Q8IV16	1	0	1	Cancer								1
LOC400499	QDVLVEGSG	Uncharacterized protein	M0QZD8	1	0	2	Cancer								1						1
JAKMIP2	DEALSNMIQ;QELEATLY	Janus kinase and microtubule-interacting protein 2	Q96AA8	2	0	1	Cancer								2
PSMD12	QELQVETY	26S proteasome non-ATPase regulatory subunit 12	O00232	1	0	2	Cancer								1			1
CNTNAP2	QGELVESN	Contactin-associated protein-like 2;Contactin-associated protein-like 2 (Fragment);cDNA FLJ53861, highly similar to Contactin-associated protein-like 2	A0A0J9YYA0;A0A0J9YWG3;B7Z1Y6;Q9UHC6	1	0	4	Cancer								1			1	1		1
PRKCZ	DEGLIIHVF;QIYAMKVVK	Protein kinase C zeta type;Protein kinase C zeta type (Fragment)	D6RAU1;D6REZ8;D6RGG1;E9PBE1;F2Z2H9;Q05513	2	0	1	Cancer								2
COX18	QLATGGILW	Cytochrome c oxidase assembly protein COX18, mitochondrial;COX18 protein	B7ZL88;Q8N8Q8	1	0	1	Cancer								1
TOMM40	QLGPGLRSK	Mitochondrial import receptor subunit TOM40 homolog;Mitochondrial import receptor subunit TOM40 homolog (Fragment)	K7EKG4;K7EJ57;O96008	1	0	1	Cancer								1
SLAIN2	QLLQTSSTK	SLAIN motif-containing protein 2;SLAIN motif-containing protein 2 (Fragment)	H0Y9L2;D6RIF6	1	0	1	Cancer								1
WDR19	QLYEKGLYY	WD repeat-containing protein 19	Q8NEZ3	1	0	2	Cancer								1							1
GPSM3	QLYSTILSH	G-protein-signaling modulator 3	E9PIP3;Q9Y4H4	1	0	2	Cancer								1							1
CREB1	QPGTTILQY	Cyclic AMP-responsive element-binding protein 1;Cyclic AMP-responsive element-binding protein 1 (Fragment)	H7C1R5;H7C3I0;C9J896;P16220	1	0	2	Cancer								1							1
SNRPE	QPINLIFRY	Small nuclear ribonucleoprotein E	P62304	1	0	2	Cancer								1							1
3;ENTPD1	QHQETPVYL;QPWEEIKTSY;RVKGPGISK;RVKGPGISKF	Ectonucleoside triphosphate diphosphohydrolase 1;Uncharacterized protein (Fragment)	A0A0U1RR44;P49961;R4GMQ9	4	1	3	Both		1					1	3							3
TFPT	QVNERVLNR	TCF3 fusion partner	A0A0G2JP55;A8MTQ3;P0C1Z6	1	0	1	Cancer								1
PBX1;PBX2;PBX3;PBX4	EIKEKTGLSIR;HVINQTGGY;HVISQTGGY;KLAQIRHIY;KLSQIRQIY;NEFTTHVM;QVSNWFGNK;YSDGLGGNSLY	Pre-B-cell leukemia transcription factor 1;Pre-B-cell leukemia transcription factor 1 (Fragment);Pre-B-cell leukemia transcription factor 2;Pre-B-cell leukemia transcription factor 3;Pre-B-cell leukemia transcription factor 3 (Fragment);Pre-B-cell leukemia transcription factor 4	A0A087X0P4;A0A0A0MTI0;F8WA05;H0Y5D0;H0YKH1;H0YLB0;H0YLD4;H0YLF5;H0YLM3;H0YLT4;P40424;P40425;P40426;Q5JS98;Q9BYU1;U3KQA2	8	1	6	Both		1					2	3			2	1	1	1
SIX1;SIX2;SIX4;SIX5	QVSNWFKNR;VPVEEPLEL	Homeobox protein SIX1;Homeobox protein SIX2;Homeobox protein SIX4;Homeobox protein SIX4 (Fragment);Homeobox protein SIX5;Homeobox protein SIX5 (Fragment)	A0A087WXX3;G3V2N2;H0YLK1;Q15475;Q8N196;Q9NPC8;Q9UIU6	2	0	2	Cancer								1						1
4;C11orf98	AVIDQGLITR;RANITLSGK	Uncharacterized protein;Uncharacterized protein C11orf98	A0A494BXY3;E9PLD3;E9PRG8	2	1	1	Both		1						1
ENDOG	REDDSVHAY	Endonuclease G, mitochondrial	Q14249	1	0	1	Cancer								1
HLA-DPB1;HLA-DQB1;HLA-DQB2;HLA-DRB1	EYARFDSDVGVYR;GEFRAVTEL;GVTRYIYNR;RATPENYLF;RAVTPLGPPAAEYW;RFDSDVGEF;RYFYHQEEY;RYIYNREEF;SPEDFVYQF;TPLGPPDAEYW;VEHPSLQSP;VMLSTPVAEA;YAFNGTQRF;YEAELRTTL;YPGSIQVRW;YQLELRTTL	HLA class II histocompatibility antigen DP beta chain;HLA class II histocompatibility antigen DQ beta chain;HLA class II histocompatibility antigen, DP beta 1 chain;HLA class II histocompatibility antigen, DP beta 1 chain (Fragment);HLA class II histocompatibility antigen, DQ beta 1 chain;HLA class II histocompatibility antigen, DQ beta 1 chain (Fragment);HLA class II histocompatibility antigen, …	A0A0D5XQ77;A0A0G2JH31;A0A0G2JII1;A0A0G2JJV3;A0A0U5Q247;A0A140T8Z1;A0A140T8Z3;A0A140T8Z5;A0A140T8Z7;A0A140T915;A0A140T928;A0A140T966;A0A140T976;A0A140T981;A0A140T999;A0A140T9A5;A0A140T9B0;A0A140T9F0;A0A140T9H0;A0A140T9H9;A0A140T9I3;A0A140T9J1;A0A140T9L5;A0A140T9P1;A0A140T9P7;A0A140T9Q1;A0A140T9R6;A0A140T9S2;A0A140T9S8;A0A140T9T0;A0A140T9T6;A0A140T9U9;A0A140T9Y0;A0A140T9Y2;A0A140T9Y4;A0A140T9Z9;A0A…	16	4	9	Both		1	2		3	3	2	5	1	1	1	5	1	2	2
CYP2U1	RFDYTNSEF	Cytochrome P450 2U1	E9PGH5;Q7Z449	1	1	2	Both						1		1							1
B3GNT5	RGAPPIRDK	Lactosylceramide 1,3-N-acetyl-beta-D-glucosaminyltransferase	Q9BYG0	1	0	1	Cancer								1
NUMB;NUMBL	AFDASRTSF;DVYVPEASR;GEAGTPVAA;GSFRGFPALSQK;RGFPALSQK;SSATTSPFFK;TFDASRTTF	Numb-like protein;Numb-like protein (Fragment);Protein numb homolog;Protein numb homolog (Fragment)	A0A0C4DGH3;G3V3M5;G3V3R1;G3V3Z8;G3V433;G3V4S6;M0QXQ4;M0QYC2;P49757;Q9Y6R0	7	1	6	Both						1	1	4	1		1			2	2
RIMKLA	RIASELKLK	N-acetylaspartylglutamate synthase A	Q8IXN7	1	0	1	Cancer								1
LTBP1	RIDGPTGQK	Latent-transforming growth factor beta-binding protein 1	C9JD84;E7EV71;Q14766	1	0	2	Cancer								1							1
SORD	RIGNFIVKK	Sorbitol dehydrogenase	H0YKB3;H0YLA4;Q00796	1	0	2	Cancer								1							1
MAP7	IIHGTASYK;RAVSPSNPK;RIIHGTASYK	Ensconsin	A0A087WZ40;Q14244	3	0	1	Cancer								3
ZNF512	RIKPAATSHVEGSGGVSAK;RIKPAATSHVEGSGGVSAKGK	Zinc finger protein 512	G3XAG1;Q96ME7	2	0	1	Cancer								2
SINHCAF	FGFHKPKMY;RIKSNQISK;RIKSNQISKL	SIN3-HDAC complex-associated factor;SIN3-HDAC complex-associated factor (Fragment)	F5GZ82;F5H6U2;Q9NP50	3	1	4	Both		1					1	2				1			1
HES4	RINESLAQLK	Transcription factor HES-4	E9PB28;Q9HCC6	1	0	1	Cancer								1
DCBLD2	RIYNGIGVSR	Discoidin, CUB and LCCL domain-containing protein 2;Discoidin, CUB and LCCL domain-containing protein 2 (Fragment)	Q96PD2;C9JIW6	1	0	1	Cancer								1
MRPS21	RIYNMEMARK	28S ribosomal protein S21, mitochondrial	P82921	1	0	2	Cancer								1							1
WIPF2	DDFESKYSF;FLDDFESKY;RIYPSKTNR	WAS/WASL-interacting protein family member 2;WAS/WASL-interacting protein family member 2 (Fragment)	A8MWR2;J3KSA3;Q8TF74	3	1	6	Both					1		1	2			1		1	1	2
SFSWAP	RLAAAAREK	Splicing factor, suppressor of white-apricot homolog;Splicing factor, suppressor of white-apricot homolog (Fragment)	H0YFR9;Q12872	1	0	1	Cancer								1
SPIN4	RLADSLIGK	Spindlin-4	X6R8Y7;Q56A73	1	0	1	Cancer								1
RPUSD4	RLAEKLRAQK	Mitochondrial RNA pseudouridine synthase RPUSD4;Mitochondrial RNA pseudouridine synthase RPUSD4 (Fragment)	E9PJV3;Q96CM3	1	0	1	Cancer								1
PDCL3	RLAEWKATKL;TRDELEWKL	Phosducin-like protein 3;Phosducin-like protein 3 (Fragment)	C9JST4;H7BZP2;Q9H2J4	2	1	5	Both			1				1	1				1		1	1
ADM	RLDVASEFRKK	ADM	E9PML4;E9PQT2;P35318	1	0	1	Cancer								1
HNRNPR;SYNCRIP	AAQEAVKLY;AEKLDEIYV;DERAIDAL;EAVKLCDSY;EILEKSFSEF;FVRNLATTV;GLTDVILYH;HEIRSGKHI;IEAGLPQKV;IHSENFQTL;KEFNEDGALAVL;KEIEGEEIEI;KEIEGEEIEIVL;KTKEQILEEF;LEKSFSEF;LEYEDHKTA;NEDGALAVLQQF;QDTYGQQWK;REFNEEGALSVL;RLFVGSIPK;SEFGKLERV;TEEILEKAF;TTVTEEILEKS	Heterogeneous nuclear ribonucleoprotein Q;Heterogeneous nuclear ribonucleoprotein Q (Fragment);Heterogeneous nuclear ribonucleoprotein R;Heterogeneous nuclear ribonucleoprotein R (Fragment)	A0A286YEZ8;B4DT28;B7Z645;F6UXX1;O43390;O60506	23	4	9	Both		5	1	1		2	3	5	6	1	2	6	1	2	3
SSH3	RLGLPLQQY	Protein phosphatase Slingshot homolog 3;Protein phosphatase Slingshot homolog 3 (Fragment)	E9PIT5;A0A087WWG1;Q8TE77	1	0	1	Cancer								1
3;4;RPS17	DQEIIEVDPDTKEML;DQEIIEVDPDTKEMLK;DQEIIEVDPDTKEMLKL;EEIAIIPSKKL;EVDPDTKEM;IEVDPDTKEML;KLLDFGSLSNL;LDFGSLSNLQVTQP;LLDFGSLSNL;LLDFGSLSNLQVTQP;RERRDNYVP;RLGNDFHTNK;VTQPTVGMNFK	40S ribosomal protein S17;40S ribosomal protein S17 (Fragment);Uncharacterized protein;Uncharacterized protein (Fragment)	A0A075B716;A0A0J9YYC4;H0YN73;H0YN88;H3BNC9;P08708	13	2	5	Both			7			1	1	2	5		1			1
FAM162A	RLKEEAAMK	Protein FAM162A	F8W7Q4;Q96A26	1	0	2	Cancer								1							1
KIF13A;KIF13B	HASGVNSIL;HPADMQLVL;LESLGISL;RLKEGSNINK;SETPHALTV;SHSVSTATL	Kinesin-like protein;Kinesin-like protein KIF13A;Kinesin-like protein KIF13A (Fragment);Kinesin-like protein KIF13B;Kinesin-like protein KIF13B (Fragment)	A0A1B0GUA8;E7ERX9;H0Y307;H0Y925;H0Y9Z7;H0YBA8;Q9H1H9;Q9NQT8	6	2	5	Both		1				2	1	1				2	1	1
GALNS	RLMDRPIFY	N-acetylgalactosamine-6-sulfatase	P34059	1	0	2	Cancer								1							1
LMF1	RLPQHTPTSR	Lipase maturation factor 1;Lipase maturation factor (Fragment)	H3BP58;H3BN37;Q96S06	1	0	1	Cancer								1
DTWD2	GLYPKPMPK;RLSKEHLLK	DTW domain containing 2, isoform CRA_d;DTW domain-containing protein 2	D6RBD8;J3KND6;Q8NBA8	2	0	1	Cancer								2
BARX2	RLSSPGQLK	Homeobox protein BarH-like 2	Q9UMQ3	1	0	1	Cancer								1
BET1	NERLTESL;RLTESLRSK	BET1 homolog;BET1 homolog (Fragment)	A0A3B3IU16;C9JTT8;H7C1N3;O15155;Q68DU7	2	0	1	Cancer								2
TXNRD1	RLYAGSTVK	Thioredoxin reductase 1, cytoplasmic	A0A087WSW9;A0A087WSY9;Q16881;E2QRB9;F8W809;A0A182DWI3;E9PIR7	1	0	1	Cancer								1
ARL4D	RLYEMILKR	ADP-ribosylation factor-like protein 4D	P49703	1	0	2	Cancer								1							1
GEMIN8	RLYGDSAAK	Gem-associated protein 8	Q9NWZ8	1	0	1	Cancer								1
PSPHP1	RMISHSELRK	Putative phosphoserine phosphatase-like protein	O15172	1	0	1	Cancer								1
DLEC1	RMQEHLAK	Deleted in lung and esophageal cancer protein 1	Q9Y238	1	0	1	Cancer								1
CD37	DVVEKTIQKY;RNLDHVYNR	Leukocyte antigen CD37;Leukocyte antigen CD37 (Fragment);Tetraspanin	B7ZAN3;M0QZP6;P11049	2	1	3	Both						1	1	1				1
UTP23	RSNPKVLSEKQNAEGE	rRNA-processing protein UTP23 homolog	Q9BRU9	1	0	2	Cancer								1							1
ZNF644	RTFGSTSQSSSFSK	Zinc finger protein 644	A0A087WZL9;Q9H582	1	0	1	Cancer								1
SOCS5	ATAQVNPLYK;RTFPFSLQY	Suppressor of cytokine signaling 5	O75159	2	0	1	Cancer								2
ADGRF1	ALSSWKQTEK;AVTQPSNTYK;RTKIWGTFK	Adhesion G-protein coupled receptor F1;Adhesion G-protein-coupled receptor F1;Adhesion G-protein-coupled receptor F1 (Fragment)	A0A0C4DH10;H7C4N3;H7C570;Q5T601	3	0	1	Cancer								3
RASSF6	RTMSEAALVRK	Ras association domain-containing protein 6	Q6ZTQ3	1	0	1	Cancer								1
METTL27	RTNSSNLQY	Methyltransferase-like protein 27	Q8N6F8	1	0	1	Cancer													1
TNFRSF1A	DTDDPATLY;RAAPSPLQK;RTSTGIIGVK	Tumor necrosis factor receptor superfamily member 1A	F5GWJ4;F5H061;P19438	3	0	2	Cancer							1	2
TP53TG5	RTVLKNLSLLK	TP53-target gene 5 protein	Q9Y2B4	1	0	2	Cancer								1							1
TJP3	RTYEREALK	Tight junction protein ZO-3	O95049	1	0	1	Cancer								1
RIN1	RTYSPSAQVK;RTYSPSAQVKR	Ras and Rab interactor 1	E9PNR2;Q13671	2	0	2	Cancer								2							1
PKP4	QHSQLGQDL;RLQHQQLYY;RTYYSPVYR	Plakophilin-4	A0A0D9SF60;Q99569	3	1	3	Both		1					1	2				1
ADCK2	RVAELILHH	Uncharacterized aarF domain-containing protein kinase 2;Uncharacterized aarF domain-containing protein kinase 2 (Fragment)	H7C4I2;C9JE15;Q7Z695	1	0	2	Cancer								1							1
PUSL1	RVAPAHGLFLK	tRNA pseudouridine synthase-like 1;tRNA pseudouridine synthase (Fragment)	J3KTG4;Q8N0Z8	1	0	2	Cancer								1							1
DERA	DEWLKPELF;RVCDAVKALK	2-deoxyribose-5-phosphate aldolase homolog (C. elegans), isoform CRA_a;Deoxyribose-phosphate aldolase;Deoxyribose-phosphate aldolase (Fragment)	E9PMH9;E9PML7;E9PPK3;E9PPM8;G3V158;Q9Y315	2	0	2	Cancer								2	1
4;TMEM141	AFMKGVFTF;RVDDAVAAK	Transmembrane protein 141;Uncharacterized protein (Fragment)	Q96I45;V9GYN2	2	0	3	Cancer								1				1		1
FUNDC1	HSSGPMVEK;RVFGHSSGPMVEK	FUN14 domain-containing protein 1	Q8IVP5	2	0	2	Cancer								2							1
AGAP1;AGAP3	DEISFQTVY;RVFQDVAQK	Arf-GAP with GTPase, ANK repeat and PH domain-containing protein 1;Arf-GAP with GTPase, ANK repeat and PH domain-containing protein 1 (Fragment);Arf-GAP with GTPase, ANK repeat and PH domain-containing protein 3;Arf-GAP with GTPase, ANK repeat and PH domain-containing protein 3 (Fragment)	A0A087X044;A0A087X1U1;C9J8Z2;C9J975;E7ESL9;E7EUN2;F5GXM9;H7C4F1;H7C4U6;H7C5G0;Q96P47;Q9UPQ3	2	0	2	Cancer								2							1
MRPS15	ALKAAAAAQK;RVFQETQKLKK	28S ribosomal protein S15, mitochondrial	P82914	2	0	2	Cancer								2	1
AGAP2	RVFQEVAQK;SAFGPSASI;SAFGPSASINGLVKDMSTV	Arf-GAP with GTPase, ANK repeat and PH domain-containing protein 2;Arf-GAP with GTPase, ANK repeat and PH domain-containing protein 2 (Fragment)	F8VVT9;H0YHB1;J3KNM6;Q99490	3	0	3	Cancer							2	1							1
CMC2	KLFNPPEESEK;RVIVTHGSLK	COX assembly mitochondrial protein;COX assembly mitochondrial protein 2 homolog	H3BNN8;H3BPP2;H3BRC3;H3BTB6;Q9NRP2	2	0	1	Cancer								2
NDUFB5	AEIPEGYVP;RVKELEVRK	NADH dehydrogenase (Ubiquinone) 1 beta subcomplex, 5, 16kDa, isoform CRA_g;NADH dehydrogenase [ubiquinone] 1 beta subcomplex subunit 5, mitochondrial;NADH dehydrogenase [ubiquinone] 1 beta subcomplex subunit 5, mitochondrial (Fragment)	A0A087WYD0;E7EWP0;H0Y886;H7C5C1;O43674	2	0	2	Cancer							1	1
ATOX1	RVLNKLGGVK	Copper transport protein ATOX1	E5RGN3;E5RIM7;O00244	1	0	2	Cancer								1							1
BSDC1	RVLPKDLSQK	BSD domain-containing protein 1	Q9NW68	1	0	1	Cancer								1
RPS19	HLYLRGGAGVGSMTK;RIAGQVAAANK;RVLQALEGLK;STARHLYLR	40S ribosomal protein S19;40S ribosomal protein S19 (Fragment)	A0A075B6E2;M0QXK4;M0R140;P39019	4	2	1	Both		1				1		4
CXCL6	RVNPKTIGK	C-X-C motif chemokine 6;C-X-C motif chemokine	D6RF92;P80162	1	0	2	Cancer								1	1
FAM136A	KMKEALLSIGK;RVQEAVESMVK	Protein FAM136A	C9J2Y4;E7EQY1;Q96C01	2	1	3	Both				1				1	1						2
TACSTD2	RVRGEPLQVER	Tumor-associated calcium signal transducer 2	P09758	1	0	1	Cancer								1
MTRF1	RVSDHRIAY	Peptide chain release factor 1, mitochondrial	O75570	1	0	1	Cancer								1
SACM1L	ATDFDVLSY;RVSTEVTLAVK	Phosphatidylinositide phosphatase SAC1	F8WCQ2;Q9NTJ5	2	1	5	Both					1		1	1					1	1	2
MAPK8IP3	NEQLLTQY;RVWCGYKNK	C-Jun-amino-terminal kinase-interacting protein 3	A0A087WYG2;E9PFH7;Q9UPT6	2	0	2	Cancer								2			1
CHMP1A	KVQTAVTMK;RVYAENAIRK;RVYAENAIRKK	Charged multivesicular body protein 1a	F5H875;F8VUA2;F8VVT7;Q9HD42	3	1	3	Both				1				2	2						1
FIP1L1;3	RVYGTTGTK	Pre-mRNA 3'-end-processing factor FIP1;Uncharacterized protein	A0A0B4J203;Q6UN15	1	0	1	Cancer								1
WDR45B	RVYNTDPLKEK	WD repeat domain phosphoinositide-interacting protein 3;WD repeat domain phosphoinositide-interacting protein 3 (Fragment)	I3L4L8;I3L1D0;I3L4S6;Q5MNZ6	1	0	2	Cancer								1							1
ZNRD1	DEGQTVFY;SADEGQTVF	DNA-directed RNA polymerase I subunit RPA12	Q9P1U0	2	0	1	Cancer								2
POLR3K;TCEA1;TCEA3	DETNARDTY;MASDELKEM;NPNLRKNVL;SADEPMTTF;STDEEVTSL	cDNA FLJ51251, moderately similar to Transcription elongation factor A protein 1;DNA-directed RNA polymerase III subunit RPC10;Transcription elongation factor A protein 1;Transcription elongation factor A protein 3;Transcription elongation factor A protein 3 (Fragment)	A0A1W2PPZ5;A0A1W2PRL9;B7Z4S1;E5RIS7;E5RJ93;O75764;P23193;Q9Y2Y1;S4R3M9	5	1	4	Both			1					2	1					1	2
GINS3	SADPNVVDL	DNA replication complex GINS protein PSF3	Q9BRX5	1	0	2	Cancer								1						1
MATN1	SATDLVFLI	Cartilage matrix protein	P21941	1	0	2	Cancer								1							1
SRCIN1	SEAELPLGF	SRC kinase signaling inhibitor 1;SRC kinase-signaling inhibitor 1 (Fragment);SRC kinase-signaling inhibitor 1	A0A087WU33;A0A087X165;Q9C0H9	1	0	1	Cancer								1
NME1;NME1-NME2	SEDLLKEHY	Nucleoside diphosphate kinase A;NME1-NME2 readthrough;Nucleoside diphosphate kinase	E5RHP0;E7ERL0;J3KPD9;Q32Q12;P15531	1	0	1	Cancer								1
CTNNBIP1	SEEEFLRTY	Beta-catenin-interacting protein 1	Q9NSA3	1	0	2	Cancer								1			1
MKRN2	AHSVPSPAF;HEMEKAFAF;SEFVIPSVY	Probable E3 ubiquitin-protein ligase makorin-2	C9J494;Q9H000	3	1	4	Both		1					1	2			1	1
USP43	SEKLPPEATK	Ubiquitin carboxyl-terminal hydrolase 43	Q70EL4	1	0	2	Cancer								1							1
NACC2	SEQLVVMY	Nucleus accumbens-associated protein 2	Q96BF6	1	0	1	Cancer								1
FRY;FRYL	DEELRALAF;EHSDLIMTL;EIIKIIGKY;ESNTVTQSR;ETASRIAKV;EVQRTDGVL;FAYTRLQLL;FPDWREDVL;GADQTTLLY;IPDHPDLLL;IQNVPVHQR;KLIGQVHEV;LPEDTTSVL;LYSVSLALL;RLFQTIQRK;SEVALQTAL;SPEATSLVL;YPVEDFEASF	Protein furry homolog;Protein furry homolog-like;Protein furry homolog-like (Fragment)	A0A0C4DFX2;A0A286YEZ9;A0A286YFA9;A0A2C9F2R7;A0A2R8Y5V8;A0A2R8YCY2;D6RJI4;F2Z2S2;H0Y9X0;O94915;Q5TBA9	18	4	5	Both		2	3	1		3	3	4				5	1	6
SPHK2	SEWDGIVTV	Sphingosine kinase 2	M0R0E9;A0A075B7A1;E9PCV4;M0R344;Q9NRA0	1	0	3	Cancer								1				1	1
ZMAT5	SFQDNLHNR	Zinc finger matrin-type protein 5	Q9UDW3	1	0	1	Cancer								1
SARG	FHSDPQHWL;GEDPNSRLA;SAAIPAAGK;SGEDPNSRL;SGVGLSSYLSTEK	Specifically androgen-regulated gene protein	Q9BW04	5	0	2	Cancer							2	3
MBD2;MBD3	AFDIAEEL;DIRKQEELV;NAFDIAEEL;SIFKQPVTK	Methyl-CpG binding domain protein 3, isoform CRA_b;Methyl-CpG-binding domain protein 2;Methyl-CpG-binding domain protein 2 (Fragment);Methyl-CpG-binding domain protein 3;Methyl-CpG-binding domain protein 3 (Fragment)	A0A087WT34;A0A087X1H1;A0A0A0MTS6;J3KSA7;K7EIE8;O95983;Q9UBB5	4	2	5	Both				1		1		1	1			1		2	1
FAM13A	ALQKALLYY;SIHGRPVTK	Protein FAM13A	E9PGM7;O94988	2	1	2	Both				1				2							1
SNRPA1	ELIEQAAQY;NAIANASTL;SILRNPVTNK	Small nuclear ribonucleoprotein polypeptide A', isoform CRA_a;U2 small nuclear ribonucleoprotein A';U2 small nuclear ribonucleoprotein A' (Fragment)	H0YKK0;H0YLR3;H0YMA0;P09661	3	0	5	Cancer							2	1	1			1			1
PITX1	SLAPAPLSTK	Pituitary homeobox 1	P78337	1	0	1	Cancer								1
DRC3	SLFNNRISK	Dynein regulatory complex subunit 3;Dynein regulatory complex subunit 3 (Fragment)	J3KRB8;J3QRH8;Q9H069	1	0	1	Cancer								1
NTHL1	HEINGLLVGF;SLGPGAGPR	Endonuclease III-like protein 1;Endonuclease III-like protein 1 (Fragment)	A0A494BZZ6;A0A494C106;H3BPD5;H3BUV2;P78549	2	0	1	Cancer								2
COX6C	DVMKDFEEM;NHMAVAFVL;SLGVAALYK	Cytochrome c oxidase subunit 6C	P09669	3	2	4	Both		1	1				2	1				2			1
PUS7L	HFDIVIRNL;SLHSAIRQK	Pseudouridylate synthase 7 homolog-like protein;Pseudouridylate synthase 7 homolog-like protein (Fragment)	F8VP66;F8VW99;F8VZA0;Q9H0K6	2	0	1	Cancer								2
LINGO4	SLKEFSDILP	Leucine-rich repeat and immunoglobulin-like domain-containing nogo receptor-interacting protein 4	Q6UY18	1	0	1	Cancer								1
RNF168	SLQPSISQK	E3 ubiquitin-protein ligase RNF168	Q8IYW5	1	0	1	Cancer								1
WASF1	SLSALPFSQ	Wiskott-Aldrich syndrome protein family member 1	Q92558	1	0	1	Cancer								1
MFSD5	SLYRIATSK	Molybdate-anion transporter;Molybdate-anion transporter (Fragment)	F8VV69;Q6N075	1	0	1	Cancer								1
ATP5F1C	RLKSIKNIQK;SMKMVAAAK	ATP synthase subunit gamma, mitochondrial	P36542	2	0	1	Cancer								2
SPARCL1	EKVHENENI;SNGEEEEE	SPARC-like protein 1	Q14515	2	0	2	Cancer							1	1
SPPL2A	SPAGAALLW	Signal peptide peptidase-like 2A	Q8TCT8	1	0	1	Cancer								1
BACH1	LENKNVQTP;SPEPGQRTF	Transcription regulator protein BACH1;Transcription regulator protein BACH1 (Fragment)	C9IYR0;C9JMP6;H7C4B6;O14867	2	0	3	Cancer							1	1							1
IQCE	SPLTWEHAW	IQ domain-containing protein E;IQ domain-containing protein E (Fragment)	C9JP75;C9JE72;A0A087WX19;A0A087WX45;Q6IPM2	1	0	1	Cancer								1
SQOR	SPVADAAGW	Sulfide:quinone oxidoreductase, mitochondrial	Q9Y6N5	1	0	1	Cancer								1
GPS2	EHANQQTGF;SAFPAVQYL;SQNPRFYHK	G protein pathway suppressor 2;G protein pathway suppressor 2 (Fragment)	I3L1H4;I3L242;I3L3Y9;I3L4X7;Q13227	3	1	4	Both		1					2		1			2			1
ZNF628	SSNLLLHQR	Zinc finger protein 628	A0A087WSX5;Q5EBL2	1	0	1	Cancer								1
NOL4	SSNSRPQLS	Nucleolar protein 4;Nucleolar protein 4 (Fragment)	K7EQ17;O94818	1	0	1	Cancer								1
C1orf94	SSSALVAKGP	Uncharacterized protein C1orf94	Q6P1W5	1	0	2	Cancer								1	1
PKP1	DESAKQQVY;RTYLNLMGK;SSYYSKFQAGNGSWGYPIYNGTLK	Plakophilin-1	Q13835	3	0	1	Cancer								3
KNTC1	STAKHVFEK	Kinetochore-associated protein 1	P50748	1	0	1	Cancer								1
ZNF705B;ZNF705F;ZNF705D;ZNF705G	STITQCLLTH	Putative zinc finger protein 705B;Zinc finger protein 705F;Zinc finger protein 705D;Putative zinc finger protein 705G	A0A0G2JMF9;P0CI00;P0CH99;A8MVS1;A8MUZ8	1	0	2	Cancer									1						1
SCEL	KQQDFHEVNK;RTFLQDNSWIK;STSATTPVK	Sciellin	F2Z2X8;O95171	3	0	2	Cancer								3							1
PDE6D	DAETGKILW;STSRVRLFY	Phosphodiesterase 6D, cGMP-specific, rod, delta, isoform CRA_a;Retinal rod rhodopsin-sensitive cGMP 3',5'-cyclic phosphodiesterase subunit delta;Retinal rod rhodopsin-sensitive cGMP 3',5'-cyclic phosphodiesterase subunit delta (Fragment)	B8ZZK5;C9IZ52;O43924	2	0	1	Cancer								2
PRUNE1	DEIDLHALY;STTASLSKK	Exopolyphosphatase PRUNE1	A0A3B3ITN0;Q86TP1	2	0	2	Cancer								1							1
SLC12A7	STYAHAGAFVEK;TAAAARTQ	Solute carrier family 12 member 7;Solute carrier family 12 member 7 (Fragment)	A0A0G2JNW7;A0A0G2JQE3;A0A0U1RR18;H0YB78;Q9Y666	2	1	1	Both		1						1
ATP13A3;ATP13A4;ATP13A5	AVKVPSVFK;DEHNIQNY;GELVKAIVV;IYTIINSI;KSFSVILEHF;NEMLVKSQF;QTESQQIRY;SVASPFTSK;TESQQIRYF	Cation-transporting ATPase;Cation-transporting ATPase (Fragment);Probable cation-transporting ATPase 13A3;Probable cation-transporting ATPase 13A3 (Fragment);Probable cation-transporting ATPase 13A4;Probable cation-transporting ATPase 13A5	A0A087WYY3;A0A2R8Y635;A0A2R8YDN7;B7WPN9;H0Y4Z2;H7C1U7;Q4VNC0;Q4VNC1;Q9H7F0	9	1	8	Both					1		1	4	1		1	1	1	2	3
IL1B	ELASEMMAY;SVDPKNYPK;VHDAPVRSL	Interleukin-1 beta;Interleukin-1 beta (Fragment)	C9JSC2;C9JVK0;C9JWV2;P01584	3	1	4	Both				1			2	1	1						1
SCARF1	SVFRHFGSFQK	Scavenger receptor class F member 1	A0A0A0MR54;Q14162	1	0	1	Cancer								1
4;TPD52	LPEKTQESL;SVGSVITKK;TTEPLPEKTQESL	Tumor protein D52;Uncharacterized protein	E5RK35;H0YC42;P55327	3	1	4	Both		1						2	1					1	1
MED6	AVHGIQSAF;SVLDYFSER	Mediator of RNA polymerase II transcription subunit 6	A0A087WYL7;G3V4A5;O75586	2	0	4	Cancer							1	1				1			1
SMIM26;1	SVLGSLLYY	Small integral membrane protein 26;D-aminoacyl-tRNA deacylase (Fragment)	A0A096LPB8;A0A096LPB2;A0A096LP01;A0A087WZV9	1	0	2	Cancer								1							1
HSD17B12	SVLPYFVATK	Very-long-chain 3-oxoacyl-CoA reductase	A0A1B0GV93;Q53GQ0	1	0	1	Cancer								1
ZNF619	SVSTHLITK	Zinc finger protein 619;ZNF619 protein	Q17RW3;Q8N2I2	1	0	1	Cancer															1
PCDH8	SVYEKVLHR	Protocadherin-8	O95206	1	0	1	Cancer								1
INPP5A	SVYSGIRHK	Type I inositol 1,4,5-trisphosphate 5-phosphatase;Type I inositol 1,4,5-trisphosphate 5-phosphatase (Fragment)	Q5T1B3;H0Y2W5;Q5T1B5;Q14642	1	0	2	Cancer								1							1
TOPORS	SVYSPSGPVNR	E3 ubiquitin-protein ligase Topors	Q9NS56	1	0	2	Cancer								1							1
APOF	SYDLDPGAGSLEI	Apolipoprotein F	Q13790	1	2	3	Both				1	1			1					1	1
TMEM138	SYDLFVNSF	Transmembrane protein 138	Q9NPI0	1	0	3	Cancer								1						1	1
ATP5MF	SYKHLKHER	ATP synthase subunit f, mitochondrial	C9JU26;P56134	1	0	1	Cancer								1
TKFC	TADEIVKL	Triokinase/FMN cyclase;Triokinase/FMN cyclase (Fragment)	H0YCY6;Q3LXA3	1	0	1	Cancer								1
SELENOM	TAYRPDWNR	Selenoprotein M	A0A087WWF1;Q8WWX9	1	0	2	Cancer								1		1
OR7G2	TDLEIPLFF	Olfactory receptor 7G2;Olfactory receptor	A0A2C9F2M1;Q8NG99	1	0	1	Cancer								1
EPB41L4B	SPAQAELSY;TDYFGLQF	Band 4.1-like protein 4B	Q9H329	2	0	2	Cancer							1	1
PABPC1;PABPC1L;PABPC1L2A;PABPC3;PABPC4	AATPAVRTV;ASAPPQEQK;ELNGKQIYVGR;HPDVTEAML;HSDVTEAMLY;KEFSPFGSI;KEFSPFGTI;KSIDNKALY;KVDEAVAVL;NGKQIYVGR;QIYVGRAQK;QPADAERAL;TEAMLYEKF	Polyadenylate-binding protein;Polyadenylate-binding protein (Fragment);Polyadenylate-binding protein 1;Polyadenylate-binding protein 1 (Fragment);Polyadenylate-binding protein 1-like;Polyadenylate-binding protein 1-like 2;Polyadenylate-binding protein 3;Polyadenylate-binding protein 4;Polyadenylate-binding protein 4 (Fragment)	A0A087WTT1;B1ANR0;B1ANR1;E5RFD8;E5RGC4;E5RGH3;E5RH24;E5RHG7;E5RJB9;E5RJM8;E7EQV3;E7ERJ7;H0Y5F5;H0Y6X6;H0YAP2;H0YAR2;H0YAS6;H0YAS7;H0YAW6;H0YB75;H0YB86;H0YBN4;H0YC10;H0YEQ8;H0YER0;H0YEU6;P11940;Q13310;Q4VXU2;Q5JQF8;Q9H361	13	2	7	Both					1	3		4	1		1	3	1	3	3
NSMCE1	FINNINSVL;TEDDGRPIY	Non-structural maintenance of chromosomes element 1 homolog;Non-structural maintenance of chromosomes element 1 homolog (Fragment)	H3BN81;H3BR73;H3BSL0;I3L1I3;Q8WV22	2	0	2	Cancer							1	1
KDM4C	DSIPLSSGY;EEFREFNKY;TEDDKAYAY	Lysine-specific demethylase 4C	B0QZ60;C9J879;F8WCN1;Q9H3R0	3	0	2	Cancer							1	2
BARD1	TEFDSTVTH	BRCA1-associated RING domain protein 1;BRCA1 associated RING domain 1 isoform delta	F6MDI1;C9IYG1;A0A087X2H0;Q99728	1	0	1	Cancer								1
OTULINL	TEFNGIRDY	Inactive ubiquitin thioesterase OTULINL	Q9NUU6	1	0	3	Cancer								1	1		1
CDCA3	TEFPSKQVF	Cell division cycle-associated protein 3	F5GX58;F8WDL1;J3KMY0;Q99618	1	0	1	Cancer								1
RTRAF	DETEFRNF;RHDDYLVML;TEFRNFIVW	RNA transcription, translation and transport factor protein;RNA transcription, translation and transport factor protein (Fragment)	G3V4C6;G3V4E7;H0YJB9;Q9Y224	3	1	3	Both		1					1	2				1
DBNDD2	TEFVFPLSH	Dysbindin domain-containing protein 2;Dysbindin domain-containing protein 2 (Fragment)	H0Y7N7;Q9BQY9	1	0	1	Cancer								1
MED8	TEGRVPVF	Mediator of RNA polymerase II transcription subunit 8	Q96G25	1	0	1	Cancer								1
BRF2	TEGVLTTTF	Transcription factor IIIB 50 kDa subunit	E5RGF6;E5RGX1;Q9HAW0	1	0	1	Cancer								1
HNRNPF;HNRNPH1;HNRNPH2	DSANDGFVRL;FATHEEAVA;FTTDLFGRDLSY;GAAGVHFIY;GYGFTTDLF;IHDGAAGVHF;IHDGAAGVHFI;LPFGCTKEEIVQF;LPYKATENDIY;RSYSDPPLK;RSYSDPPLKF;SADSANDGF;SDGYGFTTDLFGRDLS;SEDDVKMAL;SYSDPPLKF;TENDIYNFF;TGYGGYEEY;TTDLFGRDLSY;VEFATHEEA;YIGIVKQAGLE	Heterogeneous nuclear ribonucleoprotein F;Heterogeneous nuclear ribonucleoprotein F (Fragment);Heterogeneous nuclear ribonucleoprotein H;Heterogeneous nuclear ribonucleoprotein H (Fragment);Heterogeneous nuclear ribonucleoprotein H2	A0A1B0GW42;E9PCY7;G8JLB6;H0YB39;H0YBD7;H0YBG7;P31943;P52597;P55795	20	5	9	Both		2	2	1	1	2	4	5	2	1	1	3	1	5	6
TRAV38-2DV8;TRAV38-1	TENRFSVNF	T cell receptor alpha variable 38-2/delta variable 8;T cell receptor alpha variable 38-1	A0JD32;A0A0B4J264	1	0	1	Cancer								1
NTAN1	TEQLRIGPY	Protein N-terminal asparagine amidohydrolase;Protein N-terminal asparagine amidohydrolase (Fragment)	H3BPN7;A0A087X0T5;H3BNJ5;Q96AB6	1	0	1	Cancer								1
ADK	TESEVTAF	Adenosine kinase	P55263	1	0	1	Cancer								1
EPB41;EPB41L2;EPB41L3	DERVITEEM;GEYRPHHRV;KELEEKVAEL;KFLTLGSKF;KVRPAELEQF;LVSPEQPPK;QAVVEEQVL;QENVGAQKI;QTETKTITY;TEDITRYFL;TEISTKEVP;TETKTITY;TEVGSVSEV;VEEEPRPAA;YIKVRPAEL	4.1G isoform;Band 4.1-like protein 2;Band 4.1-like protein 2 (Fragment);Band 4.1-like protein 3;Band 4.1-like protein 3 (Fragment);EPB41 protein;Erythrocyte membrane protein band 4.1 (Elliptocytosis 1, RH-linked), isoform CRA_e;Protein 4.1	A0A0A0MRA8;A0A0A0MSA4;A0A0J9YY18;A0A1B0GTF8;A0A2R8Y5B3;A0A2R8Y7Y3;A0A2R8YD30;A0A2U3TZH6;A0A3B3ITP0;A8K968;E9PHY5;E9PIG0;E9PII3;E9PJP4;E9PK52;E9PMG5;E9PMV8;E9PN54;E9PQD2;E9PQN0;E9PRG1;H0Y5B0;J3KT37;J3QS83;O43491;P11171;Q4VB86;Q6R5J7;Q6ZSX4;Q9Y2J2	15	4	9	Both		1	1		1	1	3	2	3	2	1	4	2	4	1
RNF13	TFDDLPARF	E3 ubiquitin-protein ligase RNF13;E3 ubiquitin-protein ligase RNF13 (Fragment)	C9JU37;C9JYY4;C9JRV0;F8WDJ5;C9J8T4;C9JYN7;C9J383;O43567	1	0	1	Cancer								1
WDR4	TFDNVTSYL	tRNA (guanine-N(7)-)-methyltransferase non-catalytic subunit WDR4	P57081	1	1	3	Both						1		1						1	1
ZNF655	NEYEGSFSH;RLNSHLIQH;TFEDVAVHL;YLDPVQRDLY	Zinc finger protein 655	F8WDU5;F8WE52;Q8N720	4	2	4	Both					1	1	1	3						1	2
LAMB2;LAMB4	ATADLALGR;DFNSKHMANQR;GADPDSIEM;GEATEHLTQL;LHDGAVACKCHP;RIQNVVTSF;TFRPAAMLVER;VLLPRVLVL	Laminin subunit beta-2;Laminin subunit beta-2 (Fragment);Laminin subunit beta-4	A4D0S4;C9JMJ0;F5H520;P55268	8	1	6	Both	+	1						2	2			1	2	1	1
ZNF296	GLAEVAAAV;TLDKHLRQK	Hepatocellular carcinoma-associated antigen HCA108;Zinc finger protein 296	Q8IX33;Q8WUU4	2	1	3	Both		1					1	1		1
NOX5	TLQELQEALTL	NADPH oxidase 5	Q96PH1	1	0	2	Cancer								1		1
ELMO3	TLSIPFVRK	Engulfment and cell motility protein 3	F8W9E7;Q96BJ8	1	0	1	Cancer								1
CCDC82	DESFLGTLY;ETVERIFRR;TLYDGTRQK	Coiled-coil domain-containing protein 82	A0A2R8Y4L3;A0A2R8Y7C3;A0A2R8YE98;A0A494BZX3;Q8N4S0	3	0	2	Cancer								3							1
DRAM1	TMYTRYKIVQK	DNA damage-regulated autophagy modulator protein 1	A0A0B4J256;Q8N682	1	0	1	Cancer								1
ARPIN;ARPIN-AP3S2;C15orf38-AP3S2	TPDHTVAFW	Arpin;Arpin (Fragment);ARPIN-AP3S2 readthrough (Fragment);Protein C15orf38-AP3S2	H0YMP5;H0YL03;H0YL85;A0A0A6YYH1;Q7Z6K5	1	0	1	Cancer								1
IL18BP	TPDLSPLW	Interleukin-18-binding protein;Interleukin 18 binding protein, isoform CRA_a	G3V1C5;O95998	1	0	1	Cancer								1
ZFP1	TPIEERGDLF	Zinc finger protein 1 homolog	J3KNQ1;Q6P2D0	1	0	1	Cancer								1
ARHGAP6	ETDPDVVDY;TPSTPQEKSPSG	Rho GTPase-activating protein 6;Rho GTPase-activating protein 6 (Fragment)	H7BYE6;O43182	2	0	3	Cancer							1	1	1
IKZF5	TSPEPRPSHSQ	Zinc finger protein Pegasus	Q9H5V7	1	0	1	Cancer								1
REV3L	SAMTQNPRP;TTQDPLSNK	DNA polymerase zeta catalytic subunit	O60673	2	0	3	Cancer								2	1						1
FAM177A1	TVDPTKLTW	Protein FAM177A1;Protein FAM177A1 (Fragment)	G3V583;Q8N128	1	0	1	Cancer								1
LACTB2	TVMELVKIIYK	Endoribonuclease LACTB2	Q53H82	1	0	3	Cancer								1	1						1
GLI2	TVNPVAIHK	Zinc finger protein GLI2	P10070	1	0	1	Cancer	+														1
CCDC66	TVNTSLVGK	Coiled-coil domain-containing protein 66;Coiled-coil domain-containing protein 66 (Fragment)	F8WCY0;F8WDJ0;C9JYB8;A2RUB6	1	0	2	Cancer								1							1
SNX11	HTNSKAFTAK;TVSDAILRY	Sorting nexin-11;Sorting nexin-11 (Fragment)	B4DJI7;J3KTN6;J3QLV8;J3QRB9;Q9Y5W9	2	0	3	Cancer								2				1			1
RRN3;RRN3P2	HPVAERLDILM;ITNKYQLVF;KFIDPIYQVW;TVTEVLLKY	Putative RRN3-like protein RRN3P2;RNA polymerase I-specific transcription initiation factor RRN3	A6NIE6;F5H148;H3BMT1;Q9NYV6	4	2	5	Both					1	2		1				2	1	3	1
SURF2	TVYRGLVQK	Surfeit locus protein 2	Q15527	1	0	2	Cancer								1							1
ADCY3	AIFPRAFPK;ESAQVVKKR;HENVSILF;TYDEIGVMF	Adenylate cyclase;Adenylate cyclase type 3;Adenylate cyclase type 3 (Fragment)	A0A0A0MSC1;C9JLX3;C9JYB5;H7C1A6;H7C1S5;O60266;U3KQ91	4	1	1	Both		1						3
SDF4	VADENQNHHL	45 kDa calcium-binding protein	Q9BRK5	1	0	1	Cancer								1
CNOT3	DEFEQGTYIY;VADSPAEV	CCR4-NOT transcription complex subunit 3;CCR4-NOT transcription complex subunit 3 (Fragment)	A0A0G2JNJ7;A0A0G2JPP0;A0A2H2FJL5;B7Z6J7;H7C148;H7C3F5;O75175	2	0	1	Cancer								2
ULK3	VAIKCVAK	Serine/threonine-protein kinase ULK3	H3BPN6;H3BT78;Q6PHR2	1	0	1	Cancer								1
MED12L	VALPSLLAAA	Mediator of RNA polymerase II transcription subunit 12-like protein	F8WAE6;Q86YW9	1	0	1	Cancer								1
TRDV3	VASGSEVVLL	T cell receptor delta variable 3	A0JD37	1	0	1	Cancer								1
INKA1	VCCVEEEEEEEEE	PAK4-inhibitor INKA1	Q96EL1	1	0	1	Cancer								1
OLFML2A;OLFML2B	DERIYVTNY;DQLLRHNGL;EDFYTVETI;HASVGPTL;HPEYEERFL;NHASVGPTL;SPDPTRESVL;VEFRNLENF;YGNTLVEFR	Olfactomedin-like protein 2A;Olfactomedin-like protein 2B	F2Z3N3;Q68BL7;Q68BL8	9	3	7	Both		1	1			2	1	3	2		1	2		3	1
AKR7A2;AKR7A3;AKR7L	TELDTAFMY;VEKALQAAY	Aflatoxin B1 aldehyde reductase member 2;Aflatoxin B1 aldehyde reductase member 2 (Fragment);Aflatoxin B1 aldehyde reductase member 3;Aflatoxin B1 aldehyde reductase member 4	H3BLU7;O43488;O95154;Q8NHP1	2	0	1	Cancer								2
LRFN1	VELRLTDN	Leucine-rich repeat and fibronectin type III domain-containing protein 1	Q9P244	1	0	1	Cancer								1
SLC38A2;SLC38A3	KYETEFNSL;VESELLHTY	Sodium-coupled neutral amino acid transporter 2;Sodium-coupled neutral amino acid transporter 3;Sodium-coupled neutral amino acid transporter 3 (Fragment)	A0A087WWS5;F8VQW8;F8VUY8;Q96QD8;Q99624	2	0	4	Cancer								1		1	1			1
STK32C	VESLVQLF	Serine/threonine-protein kinase 32C	Q86UX6	1	0	1	Cancer								1
RMND5A;RMND5B	DELPIEIEL;KVLQKFLTY;NHQKDIQVL;VESPLSVSF	E3 ubiquitin-protein transferase RMND5A;E3 ubiquitin-protein transferase RMND5B;E3 ubiquitin-protein transferase RMND5B (Fragment)	D6R9A2;D6RER3;D6RFE6;D6RFK1;D6RIF9;F5H6G4;Q96G75;Q9H871	4	0	5	Cancer							1	3		1	1	1
TM9SF2	VESVLPYEY	Transmembrane 9 superfamily member 2	Q99805	1	0	2	Cancer								1			1
CMBL	VEYQIKTF	Carboxymethylenebutenolidase homolog	Q96DG6	1	0	1	Cancer								1
COPS5	KISALALLK;VFDLSEKL	COP9 signalosome complex subunit 5	Q92905	2	1	3	Both						1		2						1	2
4;SIRPD	RLLGLTGLLSK;VFHVQQTEM	Signal-regulatory protein delta;Signal-regulatory protein delta (Fragment);Uncharacterized protein (Fragment)	H0Y747;H3BML4;Q5TFQ5;Q9H106	2	1	4	Both						1		2			1			1	1
PLAAT2;PLAAT3	EVAGAGAASVM;LTNKAIVKK;SALTDKAIVKK;SALTNKAIVKK;SVLSALTNK;VGDGYVVHL	Phospholipase A and acyltransferase 2;Phospholipase A and acyltransferase 3;Phospholipase A and acyltransferase 3 (Fragment)	A0A1W2PRW4;F5H7E5;P53816;Q9NWW9	6	0	5	Cancer								2	1			1		1	4
U2SURP	VGDPSTTNL	U2 snRNP-associated SURP motif-containing protein;U2 snRNP-associated SURP motif-containing protein (Fragment)	E7EW00;H0Y8D9;E7ET15;O15042	1	0	2	Cancer								1	1
SERPINB1;SERPINB6;SERPINB9	AELKELSFI;EVHSRFQSL;EVNKAGTQY;EVNKTGTQY;FAYGYIEDL;IVHKSFVEVNEEGTEAAA;IVHKSFVEVNEEGTEAAAA;LPDDGVEL;LPYQGEELSM;LPYVGKELNM;LTEVNKAGTQY;LTEVNKTGTQY;RTVEKELTY;VHKSFVEVNEEGTEAAAA	Leukocyte elastase inhibitor;Serpin B6;Serpin B6 (Fragment);Serpin B9	A0A024QZX5;A0A087X1N8;A0A2R8Y6A7;A0A2R8YD12;P30740;P35237;P50453	14	3	8	Both			1		2	1	4	2	2		1	3	3	6	4
TRPM6	VHLTGQTPV	Transient receptor potential cation channel subfamily M member 6	Q9BX84	1	0	5	Cancer								1		1	1	1		1
ACTG1;ACTRT3;POTEE;POTEF;POTEI;POTEJ;POTEKP	EEEIAALVIDNGSGM;VIDNGSGM;VIDNGSGMCKA	Actin, cytoplasmic 2;Actin, cytoplasmic 2 (Fragment);Actin-related protein T3;POTE ankyrin domain family member E;POTE ankyrin domain family member F;POTE ankyrin domain family member I;POTE ankyrin domain family member J;Putative beta-actin-like protein 3	A5A3E0;I3L1U9;I3L3I0;I3L3R2;I3L4N8;J3KT65;K7EM38;P0CG38;P0CG39;P63261;Q6S8J3;Q9BYD9;Q9BYX7	3	0	5	Cancer								2	1			2		2	1
METTL5	VIMNPPFGTK	Methyltransferase-like protein 5;Methyltransferase like 5, isoform CRA_b;Methyltransferase-like protein 5 (Fragment)	H7C0M7;E7EMN2;B8ZZE3;B8ZZC8;Q9NRN9	1	0	1	Cancer								1
CEP57	VINSIPLAK	Centrosomal protein of 57 kDa;Centrosomal protein of 57 kDa (Fragment)	H0YGT4;H0YFT8;F5GYW0;Q86XR8	1	0	1	Cancer								1
MYBBP1A	TTVTPFTAQQR;VIRSPSLLQSGAK	Myb-binding protein 1A;Myb-binding protein 1A (Fragment)	I3L1L3;I3L2H8;Q9BQG0	2	1	1	Both		1						1
SERPINE3	VISPAGVS	Serpin E3	A8MV23	1	0	1	Cancer								1
POF1B	RTYSGPMNK;VIYEKTIRK	Protein POF1B	Q8WVV4	2	0	2	Cancer								2							1
SLC25A36	VIYESIKQK	Solute carrier family 25 member 36	J3KQA4;Q96CQ1	1	0	1	Cancer								1
KRTCAP3	VLHGTVLRH	Keratinocyte-associated protein 3	Q53RY4	1	0	1	Cancer								1
ZNF512B	VLLTRSENK	Zinc finger protein 512B	Q96KM6	1	0	1	Cancer								1
ZNF554	IEEKGTPQA;VLNHHQLGY	Zinc finger protein 554	K7EQV8;Q86TJ5	2	0	2	Cancer							1	1
RHOG	VLNPTPIKR	Rho-related GTP-binding protein RhoG	P84095	1	0	2	Cancer								1							1
SLC31A2	VHSPAGMAL;VLYEGIKVGK	Probable low affinity copper uptake protein 2	O15432	2	2	3	Both		1	1				1	1				1
OST4	VLYHYVAVNNPKKQE	Dolichyl-diphosphooligosaccharide--protein glycosyltransferase subunit 4	P0C6T2	1	0	1	Cancer								1
LSM6	EYVNGQLKNK;VLYISTQK	U6 snRNA-associated Sm-like protein LSm6	P62312	2	0	1	Cancer								2
TOR4A	VLYPETSRK	Torsin-4A	Q9NXH8	1	0	1	Cancer								1
IER3	VLYPRVVRR;YALDLSTFL	Radiation-inducible immediate-early gene IEX-1	P46695	2	0	2	Cancer							1	1
ANKRD55	VNDIITTF	Ankyrin repeat domain-containing protein 55	D6RBD3;Q3KP44	1	0	1	Cancer								1
NEK2	VNLLRELKH	Serine/threonine-protein kinase Nek2	F6U4U2;P51955	1	0	1	Cancer															1
DGKD;DGKH	ETVKDFVAR;EYKDIFTRH;NSEPETLEY;TLCETVKDF;VPVQVDGEAW;YTEKCVMNNY	Diacylglycerol kinase;Diacylglycerol kinase delta;Diacylglycerol kinase delta (Fragment);Diacylglycerol kinase eta	A0A0D9SFR6;H7BZR7;Q16760;Q86XP1	6	0	3	Cancer								3					1	2
BYSL	AVRAGVREK;VRAGVREK	Bystin	F8WBL2;Q13895	2	0	1	Cancer								2
IL12RB2	VSEARGKIL	Interleukin-12 receptor subunit beta-2	A0A0A0MTN7;Q99665	1	0	1	Cancer								1
HOXD10	VSQVESPEAK	Homeobox protein Hox-D10	P28358	1	0	1	Cancer								1
TXNDC17	VTAVPTLLK	Thioredoxin domain-containing protein 17	I3L2R6;Q9BRA2	1	0	1	Cancer								1
GNB1;GNB2;GNB4	ALWDIETGQQTV;ETAQQTTTF;GHSGDVMSL;HESDINAVAF;ITNNIDPVGR;QEAEQLRNQI;VTDDGMAV	Guanine nucleotide-binding protein G(I)/G(S)/G(T) subunit beta-1;Guanine nucleotide-binding protein G(I)/G(S)/G(T) subunit beta-1 (Fragment);Guanine nucleotide-binding protein G(I)/G(S)/G(T) subunit beta-2;Guanine nucleotide-binding protein G(I)/G(S)/G(T) subunit beta-2 (Fragment);Guanine nucleotide-binding protein subunit beta-4;Guanine nucleotide-binding protein subunit beta-4 (Fragment)	B1AKQ8;B3KVK2;C9JD14;C9JIS1;C9JXA5;C9JZN1;E7EP32;F6UT28;F6X3N5;H7C5J5;P62873;P62879;Q9HAV0	7	2	5	Both			1			1	1	2			1	2			1
GNL1	VTGELGLAL	Guanine nucleotide-binding protein-like 1;Guanine nucleotide-binding protein-like 1 (Fragment)	A0A140T8Y2;P36915;A0A140T994;A2AB27	1	0	1	Cancer								1
CHMP2B	VTSMSTQTK	Charged multivesicular body protein 2b;Charged multivesicular body protein 2b (Fragment)	Q9UQN3;A0A087WW88	1	0	1	Cancer								1
BUD13	EEVKQMEAF;VTYSLPRTK	BUD13 homolog;BUD13 homolog (Fragment)	H7C462;Q9BRD0	2	0	2	Cancer								2							1
SCG5	VVAKKSVPH	Neuroendocrine protein 7B2	C9J650;C9JNY7;P05408	1	0	1	Cancer								1
C12orf60	VVDARHDKI	Uncharacterized protein C12orf60	Q5U649	1	0	1	Cancer								1
DDX59	VVDEADTML	Probable ATP-dependent RNA helicase DDX59	Q5T1V6	1	0	1	Cancer								1
BANF1	EERGFDKAY;VLGQFLVLK;VVLGQFLVLK	Barrier-to-autointegration factor	O75531	3	0	4	Cancer								3	1		1				1
TTPAL	VVNEPRIFK	Alpha-tocopherol transfer protein-like;Alpha-tocopherol transfer protein-like (Fragment)	Q5QPC2;Q9BTX7	1	0	1	Cancer								1
ALOX5AP	AAFAGLMYL;STTISPLLLIP;SVAGIFNYY;TISPLLLIP;VVQNGFFAHK	Arachidonate 5-lipoxygenase-activating protein	A0A087WW23;P20292	5	1	5	Both		1					4	1			1	2			1
GLTP	VYDTNPAKF	Glycolipid transfer protein	F5H0U5;Q9NZD2	1	0	2	Cancer								1							1
HIGD2A	TVYRNPESFK;VYRNPESFKEK	HIG1 domain family member 2A, mitochondrial	Q9BW72	2	1	3	Both						1		2	1						1
MVB12B	IEKEYEYSF;YEYQHSNLY	Multivesicular body subunit 12B	Q9H7P6	2	0	2	Cancer								2				1
TTC32	YFDDALEDF	Tetratricopeptide repeat protein 32	Q5I0X7	1	0	4	Cancer								1			1			1	1
ARPP19;ENSA	KSSLVTSKL;YFDSGDYNM	Alpha-endosulfine;cAMP-regulated phosphoprotein 19;cAMP-regulated phosphoprotein 19 (Fragment)	A0A1W2PRU0;A6NMQ3;H3BMD8;H3BQ52;H3BTD3;O43768;P56211;Q5T5H1	2	2	2	Both					1	1		1						1
TDRD1	MEQYCSIKI;YGNFEILSLMR	Tudor domain-containing protein 1	H9KV62;H9KV63;Q9BXT4	2	0	2	Cancer							1	1
NPAS1	YGPAELGLVY	Neuronal PAS domain-containing protein 1	M0R2M8;Q99742	1	0	1	Cancer								1
SLC25A43	YILSPLSYK	Solute carrier family 25 member 43	Q8WUT9	1	0	2	Cancer								1							1
LAMTOR2	YLEEPLTQV	Ragulator complex protein LAMTOR2	Q9Y2Q5	1	0	1	Cancer								1
RPL38	EIKDFLLTAR;PRKIEEIKDF;YLYTLVITDK	60S ribosomal protein L38;60S ribosomal protein L38 (Fragment)	J3KSP2;J3KT73;J3QL01;P63173	3	0	1	Cancer								3
PTPRU	DEDLVARVF;YMGLDDILL	Receptor-type tyrosine-protein phosphatase U	Q92729	2	0	1	Cancer								2
UBE2E1;UBE2E2;UBE2E3	AEHDRIARQW;EHDRIARQW;EHDRMARQW;YPFKPPKVTF	Ubiquitin-conjugating enzyme E2 E1;Ubiquitin-conjugating enzyme E2 E1 (Fragment);Ubiquitin-conjugating enzyme E2 E2;Ubiquitin-conjugating enzyme E2 E2 (Fragment);Ubiquitin-conjugating enzyme E2 E3;Ubiquitin-conjugating enzyme E2 E3 (Fragment)	A0A087X283;A0A1B0GX65;B7Z306;C9J180;C9J2P0;H7C061;P51965;Q969T4;Q96LR5;R4GND1	4	0	5	Cancer							1	1			1	2			1
CAPS	GVYSGRAHPK;YSGRAHPK	Calcyphosin;Calcyphosin (Fragment)	K7ES72;Q13938	2	0	2	Cancer								2							1
APOOL	IIAKVTAKK;VIIAKVTAK;YTAPPLQSK	MICOS complex subunit;MICOS complex subunit MIC27	A0A087WUX8;A0A087WYF7;Q6UXV4	3	0	2	Cancer								3							1
MLLT1	DETTVRKL;YTDELVEL	Protein ENL	Q03111	2	0	2	Cancer								2						1
MTUS1	GLRQIAAPK;RVSSSGKPTSLK;YTDGSQQRL	Microtubule-associated tumor suppressor 1;Microtubule-associated tumor suppressor 1 (Fragment)	H0YC63;Q9ULD2	3	0	1	Cancer								3
KLF6;KLF7	EELSPTAKF;FSALPSLEEY;GELPSPGKV;QEDLWTKIIL;QTCLELERY;REKKEESEL;TSDPIGEVL;YTKSSHLKAHQR	Krueppel-like factor 6;Krueppel-like factor 7;Krueppel-like factor 7 (Fragment)	E7EQY2;E7EUU0;O75840;Q99612	8	1	7	Both					1		1	1	2		1	1		1	1
EPCAM	YVDEKAPEF	Epithelial cell adhesion molecule	B5MCA4;P16422	1	0	1	Cancer								1
ITPR1;ITPR2;ITPR3	ATRKAFTTF;DEYKGKLQVF;EPIEESNIL;ETHGRHVEY;EVLDVVITK;EYIAKQFGF;EYLRFLQTI;FANDANKVL;FHAEQEKFL;GLFAHELFY;HADSILEKY;HEYLSIEY;HQTIVVQLL;IAIPVTQEL;IRSKSVREL;KEIETFVSLL;KEIRSTVTV;KYGSVIQLL;LPDPIGTGL;NEISERVVQHF;NEKIFQESI;NHNRELQNF;RSTVTVNTI;RTLQQMLLK;RYAPYKYML;SEINERVVQHF;SEIPSEIAI;SENAERILF;TEIPTAITI;TEIPTKITI;TEVEMKEIY;YEDPGGKNV;YHISLVDLL;YINEKNVAL;YVDTEVEM	Inositol 1,4,5-trisphosphate receptor type 1;Inositol 1,4,5-trisphosphate receptor type 1 (Fragment);Inositol 1,4,5-trisphosphate receptor type 2;Inositol 1,4,5-trisphosphate receptor type 2 (Fragment);Inositol 1,4,5-trisphosphate receptor type 3;ITPR1 protein	A0A3B3IRP0;A0A3B3IRT5;A0A3B3IRZ9;A0A3B3IS59;A0A3B3IS70;A0A3B3ITM6;A0A3B3ITQ1;A0A3B3ITU8;A0A3B3IU04;A0A3B3IU05;A0A3B3IU13;A0A3F2YNW8;B7ZMI3;H7C2X9;Q14571;Q14573;Q14643	35	3	8	Both			2		2	4	2	6	5		1	12	2	7	1
IRS4;MNX1;PHLPP1;PRDM6	AAAAAAALA;GAEEPGAEEL;LPDYYDTPL;SVKDSLTGK;TQLDLRDNK	Insulin receptor substrate 4;Motor neuron and pancreas homeobox protein 1;PH domain leucine-rich repeat-containing protein phosphatase 1;Putative histone-lysine N-methyltransferase PRDM6	O14654;O60346;P50219;Q9NQX0	5	1	5	Both		1					1	1	1			1		2
TBX2	AAAAAAGSL;TAAPFPFHL	T-box transcription factor TBX2	Q13207	2	1	3	Both		1					1		1			1
ATMIN	AAAAGSAAL	ATM interactor	O43313	1	0	1	Cancer									1
LY6E	AADGGLRASVTL	Lymphocyte antigen 6E	Q16553	1	0	1	Cancer									1
IL15RA	AAIVPGSQL	Interleukin-15 receptor subunit alpha;Interleukin-15 receptor subunit alpha (Fragment);Interleukin 15 receptor alpha isoform IC2;Interleukin 15 receptor alpha isoform IC5;Interleukin 15 receptor alpha isoform IC3;Interleukin 15 receptor alpha isoform EM2	Q5JVA3;H0Y6E8;E9PQ64;E7ETI1;H0Y4R3;K9N2S2;K9N1J3;K9N163;K9N2Q6;A0A0A0MS77;Q13261	1	0	1	Cancer									1
HCFC1;IRS4	AAAQVGTSV;AALAAAAAA;GPFSEISAF;HHHLPTEAL;HPQPTQVQF;HSATTIGNK;LPDATSSHRTV;MPFSAVDIL;SEDPKNNIP;SPDGAHLTW;TTKPAIIFR	Host cell factor 1;Host cell factor 1 (Fragment);Insulin receptor substrate 4	A6NEM2;H7C1C4;O14654;P51610	11	3	6	Both			1	1		1	2	3	1			1		1	3
STAU2	AAMKALQAL;STLPKPVQK	Double-stranded RNA-binding protein Staufen homolog 2;Double-stranded RNA-binding protein Staufen homolog 2 (Fragment)	A0A0A0MTC6;A0A0A0MTD1;E5RFK1;E5RGQ5;E5RGT3;E7EPX0;E7EVI1;E7EVJ4;E9PH62;F8VPI7;Q9NUL3	2	0	3	Cancer								1	1						1
OGDH	AAVAHAQSL	2-oxoglutarate dehydrogenase, mitochondrial;2-oxoglutarate dehydrogenase, mitochondrial (Fragment)	C9J4G7;A0A0D9SFS3;E9PDF2;E9PCR7;Q02218	1	0	1	Cancer									1
ABCC6	AAVDPGTEL	Multidrug resistance-associated protein 6	A0A1W2PQX7;A0A1W2PPQ8;A0A0G2JMG3;O95255	1	0	1	Cancer									1
GOLGA5	AEAITLAERKY;RLHEADATLK;SVNPSVTTIK	Golgin subfamily A member 5	Q8TBA6	3	0	2	Cancer								2	1
LENG8	AEASALQQQQY;YAYPYSYYY	Leukocyte receptor cluster member 8;Leukocyte receptor cluster member 8 (Fragment)	A0A087WUE4;A0A0G2JN70;A0A0G2JPW6;B0VJY8;C9J1N5;C9JMY0;E7EWC7;Q96PV6	2	1	3	Both		1					1		1			1
PBLD	AEDPVTGSAHAVL	Phenazine biosynthesis-like domain-containing protein;MAWD binding protein, isoform CRA_d	A0A0C4DFS0;P30039	1	0	1	Cancer									1
SH3BP2	AEEDPPREA;AEEDPPREAA;AEEDPPREAAM;THVLPSHQSL	SH3 domain-binding protein 2;SH3 domain-binding protein 2 (Fragment)	H0YAD9;P78314	4	1	3	Both			1				3		1			1
BOLA2	AEELPHIHAF;EELPHIHAF	BolA-like protein 2	A0A087WZT3;Q9H3K6	2	0	3	Cancer								1	1		1
PHACTR2	AEEPTNRTTL	Phosphatase and actin regulator 2;Phosphatase and actin regulator	J3KP75;O75167	1	0	1	Cancer									1
COX14	AEEQKTSGIM	Cytochrome c oxidase assembly protein COX14	Q96I36	1	0	1	Cancer									1
NOB1	AEFVGVSHL;RLNPNASRKKF;VSDDGTLHM	RNA-binding protein NOB1	Q9ULX3	3	0	4	Cancer							1	1	1			1
ELP4	AEGIVNGHTL;IVNGHTLLV	Elongation protein 4 homolog (S. cerevisiae), isoform CRA_b;Elongator complex protein 4;Elongator complex protein 4 (Fragment)	A0A1W2PNF7;A0A1W2PNY5;A0A1W2PP47;A0A1W2PP49;A0A1W2PPP6;A0A1W2PQ05;A0A1W2PQA7;A0A1W2PQZ6;A0A1W2PR08;A0A1W2PRF0;A0A1W2PRF5;A0A1W2PRJ0;A0A1W2PS44;A0A1W2PS93;A0A1X7SBS0;E9PPJ9;G5E9D4;Q96EB1	2	0	2	Cancer								1	1
ARRDC2	AEIDNGSTRP;AEIDNGSTRPVL	Arrestin domain-containing protein 2;Arrestin domain-containing protein 2 (Fragment)	Q8TBH0;V9GYU7	2	0	2	Cancer							1		1
FCF1	AEIEKLGQKY;MPDDYGAPRF	Chromosome 14 open reading frame 111, isoform CRA_a;rRNA-processing protein FCF1 homolog;rRNA-processing protein FCF1 homolog (Fragment)	G3V1S4;G3V2M5;G3V5S9;Q9Y324	2	0	3	Cancer								1	1		1
MBIP	AEIDRRISA;AEINENNVREF;HFDPEVVQI;NENNVREF	MAP3K12-binding inhibitory protein 1;MAP3K12-binding inhibitory protein 1 (Fragment)	A0A087X1L0;Q9NS73;S4R2X9;S4R3N2;S4R3P6;S4R3Y0	4	2	4	Both		1				1		2	1					1	1
SP140	AEIQNVEGQNL	Nuclear body protein SP140	Q13342	1	0	1	Cancer									1
ORC2	AELKQLNQQY	Origin recognition complex subunit 2	Q13416	1	0	2	Cancer									1		1
SCO2;TYMP	AELLVDVGQRL;LEETSVLTQAL;QSEQLVPADGILY;VGDKVSLVL	Protein SCO2 homolog, mitochondrial (Fragment);Thymidine phosphorylase;Thymidine phosphorylase (Fragment)	A0A1W2PQK0;A0A494BZZ4;A0A494C0L3;A0A494C0L6;A0A494C1L9;A0A494C1N7;C9JGI3;P19971	4	1	3	Both					1				2					1	1
VAMP5	AELQQRSDQL;AELQQRSDQLL	Vesicle-associated membrane protein 5	O95183	2	0	1	Cancer									2
GMFB;GMFG	AELTKVFEI;FEIRNTEDL;KETDNAAII;YVHDDGRVSY	Glia maturation factor;Glia maturation factor beta;Glia maturation factor beta (Fragment);Glia maturation factor gamma;Glia maturation factor gamma (Fragment)	G3V4P8;M0QX47;M0QXC2;M0QXZ6;M0QYG8;M0QYJ8;M0R0C1;M0R1D2;M0R2P2;O60234;P60983	4	1	3	Both						1			2			1			1
UBXN4	AEMEVKRESY;EIKKEIERR;KEEVEAAKAA;SADELVTRI;WEDDKVTEA	UBX domain-containing protein 4;UBX domain-containing protein 4 (Fragment)	C9JLR4;F8WB86;Q6PJ80;Q92575	5	0	5	Cancer							2	2	1		1				1
DRC1	AEPESYLDL	Dynein regulatory complex protein 1	Q96MC2	1	0	1	Cancer									1
PPFIA1	AEQKLQQTL;MADGHTDSY;QHDKDQLVL	Liprin-alpha-1;Liprin-alpha-1 (Fragment)	A0A2R8Y7R9;E9PJZ7;H0YD72;H0YEF9;H0YF15;Q13136	3	1	3	Both					1		2		1			1
PHPT1	AESKEIVRGY;YHADIYDKV	14 kDa phosphohistidine phosphatase	Q9NRX4	2	2	3	Both		1	1				1		1			1
TRIM44	AEYVHGSQAW;IADEEQKAL	Tripartite motif-containing protein 44	Q96DX7	2	1	3	Both						1			1					1	1
XBP1	AGAPAGQAL	X-box-binding protein 1	B1AHH2;P17861	1	0	1	Cancer									1
OXTR	AGDGGRVAL	Oxytocin receptor	P30559	1	0	1	Cancer									1
EIF2AK3	AIMDIVIKV;DEGHSFEL	Eukaryotic translation initiation factor 2-alpha kinase 3	E7ER02;Q9NZJ5	2	0	2	Cancer								1	1
1;CTSD;CTSE;PGA3;PGA4;PGA5;PGC	AEFDGILGL;AIVDTGTSL;ETEPGSFLYY;GEATKQPGI;GSLNWVPVTK;IVDTGTSL;IVDTGTSLL;IVDTGTSLM;LAAPASAL;LVDQNIFSFY;MAYPRISVNNVL;MQQKLVDQNIFSF;NSDKSSTYV;TEGPIPEVL;TSETVSITY;VEVASGLTL;VFIGRYYTVF;YLSQDTVSV;YPRISVNNV	Cathepsin D;Cathepsin D (Fragment);Cathepsin E;Gastricsin;Pepsin A-3;Pepsin A-3 (Fragment);Pepsin A-4;Pepsin A-5;Uncharacterized protein;Uncharacterized protein (Fragment)	A0A1B0GU03;A0A1B0GU92;A0A1B0GV01;A0A1B0GV23;A0A1B0GVD5;A0A1B0GVP3;A0A1B0GW44;A0A1B0GWE8;C9JH19;C9JM59;F5GWT0;F5GXL4;F5H0H6;F5H842;F8W787;F8WD96;H7C1V0;H7C469;P07339;P0DJD7;P0DJD8;P0DJD9;P14091;P20142	19	3	6	Both				1	3	2		2	6		1	4	2		3
NENF	ALAPGLPTA;FTEEELARY	Neudesin	Q9UMX5	2	2	3	Both			1	1			1		1					1
SPACA6	ALASASATVL	Sperm acrosome membrane-associated protein 6	W5XKT8	1	0	1	Cancer									1
4;CRLS1	ALDPLADKILI;RLKPTFISK	Cardiolipin synthase (CMP-forming);CRLS1 protein;Uncharacterized protein	A0A494C100;Q6NTG3;Q9UJA2	2	0	3	Cancer								1	1						1
SLC26A1	ALGISLLLA	Sulfate anion transporter 1	Q9H2B4	1	0	1	Cancer									1
PALD1	ALGSILAYL;LSDNTPEHY	Paladin	Q9ULE6	2	0	2	Cancer							1		1
PREX1;PREX2	ALLENGIIHHV;DESQYFRF;DTISNRDSY;EVAGLQVGR;EVIDKFNTM;EVLEHFQAF;HEDAQEARA;HHVSDKHQF;HHVTDKHQF;HPEPQSQHEL;IPTDLQSKF;IQERAFFLF;IRFGRKPSL;KTAEEKQKW;KVNLIKDRR;LEHGVVYEY;LPQEEDYGF;LTAKILEAF;NEQVMYRF;NTDVPLEGY;NYVANTNVF;QHELGNVFL;QYVTQINRL;REEAVALGVGL;RESERQLRL;SLAEVAGLQV;TADYHSNGY;TEDPSGEQA;TTDIPLEGY;TVDNVHLEY;VELNKIPTV	Phosphatidylinositol 3,4,5-trisphosphate-dependent Rac exchanger 1 protein;Phosphatidylinositol 3,4,5-trisphosphate-dependent Rac exchanger 1 protein (Fragment);Phosphatidylinositol 3,4,5-trisphosphate-dependent Rac exchanger 2 protein	H0YDZ4;Q70Z35;Q8TCU6	31	4	8	Both		3	1		3	5	10	5	3		1	9	2	8	4
IGBP1	ALPDQGIAKA	Immunoglobulin-binding protein 1	P78318	1	0	1	Cancer									1
HAMP	ALSSQIWAA	Hepcidin	P81172	1	0	1	Cancer									1
LCOR	ALVESLITV;EAISVVMSGK	Ligand-dependent corepressor	A0A1P0AZG4;Q96JN0	2	0	2	Cancer								1	1
1;TUBB;TUBB1;TUBB2A;TUBB2B;TUBB3;TUBB4A;TUBB4B;TUBB6	ALYDICFRTL;ATGGKYVPR;DEHGIDPTGTY;EATGGKYVPR;FSVVPSPKVSDTVVEPY;GTYHGDSDL;HGIDPTGTY;LTQQVFDAK;NATLSVHQLVENTDETY;QDATAEEEEDFGEEAEEEA;QLDRISVYY;RVSEHFSAMFK;RYLTVAAVF;RYLTVATVF;SVVPSPKVSDTVVEP;SVVPSPKVSDTVVEPY;SVVPSPKVSDTVVEPYNAT;SVVPSPKVSDTVVEPYNATLSVH;SVYYNEATGGK;SVYYNEATGGKY;SVYYNEATGGKYVPR;TVAAVFRGR;YHGDSDLQL;YNEATGGKYVPR;YPDRIMNTF	Tubulin beta chain;Tubulin beta chain (Fragment);Tubulin beta-1 chain;Tubulin beta-2A chain;Tubulin beta-2B chain;Tubulin beta-3 chain;Tubulin beta-4A chain;Tubulin beta-4A chain (Fragment);Tubulin beta-4B chain;Tubulin beta-6 chain;Uncharacterized protein	A0A0B4J269;CON__ENSEMBL:ENSBTAP00000025008;G3V2A3;K7ESM5;M0QX14;M0QY37;M0QY85;M0QYM7;M0QZL7;M0R042;M0R0X0;M0R278;M0R2D3;P04350;P07437;P68371;Q13509;Q13885;Q5JP53;Q5ST81;Q9BUF5;Q9BVA1;Q9H4B7	25	4	8	Both		8	3		1	6	3	9	4	3		7	3	7	8
SELENOT	ASANLGGVPSK	Thioredoxin reductase-like selenoprotein T;Selenoprotein T	F8WBD0;A0A087WVA1;P62341	1	0	1	Cancer									1
ZFYVE27	ASCNQTLSK;EYRASLQQR	Protrudin	Q5T4F4	2	0	2	Cancer								1	1
DYNLRB1	ASLMHSFILK;SLMHSFILK;TMDNPTTTQY	Dynein light chain roadblock-type 1	B1AKR6;Q9NP97	3	2	4	Both				1	1		1	1	2						2
CSNK2B	ASNFKSPVK;DIPGEAMVKLY;DVYTPKSSR;HARYILTNR;HHHTDGAYF	Casein kinase II subunit beta	A0A0G2JM12;N0E472;P67870;Q5SRQ3;Q5SRQ6	5	1	6	Both		1					2	2	1	1		2		1
DERPC	ASNPATFQR	Decreased expression in renal and prostate cancer protein	P0CG12	1	0	2	Cancer									1						1
MCRS1	ASSQALGTIPK;LYDPVISKL	Microspherule protein 1;Microspherule protein 1 (Fragment)	F8VP44;F8VVA6;F8W0I9;F8W126;Q96EZ8	2	1	4	Both						1		1	1					1	2
MXRA7	ATALALLLA	Matrix-remodeling-associated protein 7	P84157	1	0	1	Cancer									1
APC	ATDIPSSQK;SLDEPFIQK	Adenomatous polyposis coli protein;Adenomatous polyposis coli protein (Fragment)	E9PFT7;P25054;sp|P25054_APC_2|APC_2AdenomatouspolyposiscoliproteinOS=HomosapiensOX=9606GN=APCPE=1SV=2	2	0	3	Cancer	+							1	1						1
DCLRE1C	ATGESIAVKK	Protein artemis	B3KSJ7;Q96SD1	1	0	1	Cancer									1
PSTPIP2	AEQAVSRSA;ATGPNLARR;LVDDYSLLY	Proline-serine-threonine phosphatase-interacting protein 2	Q9H939	3	0	4	Cancer							2		1					1	1
IRF2BP2;IRF2BPL	ATILAGDVKVK;EFVIETARQLK;FVIETARQL;GEEQQRQQW;IEYPTGSGNVY;IPMTPTSSF;RFKKDHSLL;YPTGSGNVY	Interferon regulatory factor 2-binding protein 2;Probable E3 ubiquitin-protein ligase IRF2BPL	Q7Z5L9;Q9H1B7	8	1	4	Both		1						2	3					1	3
MFSD10	ATAIGMPVEK;ATIQGAYAR	Major facilitator superfamily domain-containing protein 10	D6R9N3;D6RA47;D6RE79;D6RHV1;D6RIZ4;Q14728	2	0	2	Cancer									2						2
FAM76B	ATIQNETPK	Protein FAM76B	F5GX09;Q5HYJ3	1	0	2	Cancer									1						1
GCNT1	ATIQRIPEV;EEAEFPIAY	Beta-1,3-galactosyl-O-glycosyl-glycoprotein beta-1,6-N-acetylglucosaminyltransferase	Q02742	2	0	3	Cancer								1	1		1
HDAC10	ATLDVAVRR;VHSPEYVSL	Polyamine deacetylase HDAC10	C9J8B8;Q969S8	2	0	4	Cancer							1		1			1			1
CELSR1;CELSR2;CELSR3	AADHTDHSL;ATSAPLVSR;LFLSQLVFV	Cadherin EGF LAG seven-pass G-type receptor 1;Cadherin EGF LAG seven-pass G-type receptor 1 (Fragment);Cadherin EGF LAG seven-pass G-type receptor 2;Cadherin EGF LAG seven-pass G-type receptor 3	H0Y7R9;Q9HCU4;Q9NYQ6;Q9NYQ7	3	0	4	Cancer									1			1		2	1
ASRGL1	ATSTGGIVNK	Isoaspartyl peptidase/L-asparaginase	Q7L266	1	0	2	Cancer									1						1
DCC	ATTRSITVR	Netrin receptor DCC (Fragment)	H0Y2Q5	1	0	1	Cancer									1
PET117	ATVAGVHVK	Protein PET117 homolog, mitochondrial	Q6UWS5	1	0	2	Cancer									1						1
PTPRN;PTPRN2	AEVRGLSGL;AVAEEVNAILK	Receptor-type tyrosine-protein phosphatase N2;Receptor-type tyrosine-protein phosphatase N2 (Fragment);Receptor-type tyrosine-protein phosphatase-like N	A0A0A0MSD7;A0A3B3IU41;E7EM83;Q16849;Q92932	2	0	3	Cancer									1			1			1
GNB1;GNB2;GNB3	ATGSWDSFLK;AVATGSWDSFLK	Guanine nucleotide-binding protein G(I)/G(S)/G(T) subunit beta-1;Guanine nucleotide-binding protein G(I)/G(S)/G(T) subunit beta-2;Guanine nucleotide-binding protein G(I)/G(S)/G(T) subunit beta-3	B3KVK2;E7EP32;E9PCP0;P16520;P62873;P62879	2	1	3	Both				1				1	2						2
DSC3	AVDPDEPVHGAP	Desmocollin-3	Q14574	1	1	2	Both			1						1					1
SLC35B3	AVIGNVQEK	Adenosine 3'-phospho 5'-phosphosulfate transporter 2	A0A3B3IRN3;A0A024QZW4;Q9H1N7	1	0	1	Cancer									1
DCXR	AEVEHVVNA;AVIQVSQIVAR	L-xylulose reductase;L-xylulose reductase (Fragment)	J3KRZ4;J3KS22;J3KSZ5;J3QL34;J3QS36;J3QS45;Q7Z4W1	2	0	3	Cancer							1		1						1
PRR13	AVIVDKKMQK	Proline-rich protein 13	F8VP70;F8VRX0;F8VU40;F8VZP4;Q9NZ81	1	0	1	Cancer									1
ATG101	AVLHTVLLH	Autophagy-related protein 101;Autophagy-related protein 101 (Fragment)	H3BMZ4;F8VVA0;F8VQD9;Q9BSB4	1	0	2	Cancer									1						1
TSR1	AVQGISGLPLK;PLNPRGIKPQK;RLALKTLSK	Pre-rRNA-processing protein TSR1 homolog	I3L1Q5;Q2NL82	3	1	3	Both				1				2	1						1
DNPEP	AVQTAAKELLK	Aspartyl aminopeptidase;Aspartyl aminopeptidase (Fragment)	E3W974;E5RJ35;E7EPX3;B9ZVU2;F8WAN0;C9JBE1;A0A024R442;E7ETB3;Q9ULA0	1	0	2	Cancer									1						1
AGFG1	AAFGQTKPV;AELDSVFSSA;AVSKVSTNK;FAAPAPQST	Arf-GAP domain and FG repeat-containing protein 1;Arf-GAP domain and FG repeat-containing protein 1 (Fragment)	B8ZZY2;C9J2I0;H7C0S7;P52594	4	1	2	Both		1					2		1
MORC3	AESKASLAA;DEITGKKGY	MORC family CW-type zinc finger protein 3	Q14149	2	1	3	Both		1					1		1	1
ADIG	DILQVRRYRYD	Adipogenin	A2A2E7	1	0	2	Cancer									1	1
CCDC196	DLKLRKQELL	Putative coiled-coil domain-containing protein 196;Putative coiled-coil domain-containing protein 196 (Fragment)	A0A1B0GVV6;A0A1B0GW51;A0A1B0GV15;A0A1B0GWI1;A0A286YEX8;A0A286YFE0;A0A1B0GTZ2	1	0	1	Cancer									1
FANCG	DTTAELESL	Fanconi anemia group G protein	O15287	1	0	1	Cancer									1
ERCC1	EEAGRYLETY;KSNSIIVSPR	DNA excision repair protein ERCC-1;DNA excision repair protein ERCC-1 (Fragment)	K7EJW9;K7EK97;K7EP14;K7ER60;K7ER89;K7ES46;P07992	2	0	2	Cancer								1	1
CHMP4A	EALKQLAEW;EEALKQLAEW	Charged multivesicular body protein 4a	H0YIN6;Q9BY43	2	0	2	Cancer								1	1
ZBTB17	AEVKEEGSQL;EEDPNTHILY;KLFTTSGNLK	Zinc finger and BTB domain-containing protein 17;Zinc finger and BTB domain-containing protein 17 (Fragment)	H7C1K8;Q13105	3	0	2	Cancer								1	2
CALM1;CALM2;CALM3;CALML3	AEFKEAFSL;AEFKEAFSLF;AELRHVMTNL;EEIREAFRVF;IREADIDGDGQVN;IREADIDGDGQVNY;MIREADIDGDGQVN;SAAELRHVM;SEEEIREAF;TIDFPEFL;TTKELGTVMR;YEEFVQMM	CALM1 protein;Calmodulin 3 (Phosphorylase kinase, delta), isoform CRA_d;Calmodulin-1;Calmodulin-1 (Fragment);Calmodulin-2;Calmodulin-2 (Fragment);Calmodulin-3;Calmodulin-like protein 3	E7EMB3;E7ETZ0;F8WBR5;G3V226;G3V361;G3V479;H0Y7A7;M0QZ52;P0DP23;P0DP24;P0DP25;P27482;Q96HY3	12	1	6	Both						4	1	4	6	2	1	1
PRR14;PRR14L	EEIYTNKNY;GEFQEVDKI;QVDNSLITKY	Proline-rich protein 14;Protein PRR14L;Protein PRR14L (Fragment)	H3BLU3;H7C1B0;Q5THK1;Q9BWN1	3	1	4	Both					1				1		1	1	1
LIMK2	EELDHTVSMQY;EHDPVSQRL;ELDHTVSMQY	LIM domain kinase 2	B5MC51;P53671	3	2	5	Both		1			1		2		1			1	1	1
PANX1	AAVQQKNSL;EENISEVKSY	Pannexin-1	Q96RD7	2	0	1	Cancer									2
SH2D4A	EEQLPLRAGY;THSEEFTNSL	SH2 domain-containing protein 4A;SH2 domain-containing protein 4A (Fragment)	H0YAT1;Q9H788	2	1	1	Both		1							1
THOC1	EEVLAVFKSY;IEDTTKSVY	THO complex subunit 1;THO complex subunit 1 (Fragment)	A0A087WWS1;A0A087WY84;Q96FV9;R4GMN4;R4GN58	2	0	2	Cancer								1	1
IGKV6-21;IGKV6D-21	EIVLTQSPD;EIVLTQSPDFQ	Immunoglobulin kappa variable 6-21;Immunoglobulin kappa variable 6D-21	A0A0A0MT36;A0A0C4DH24	2	3	6	Both			1	2	2		1		2		1	2	2	1
TOX3	EQTFHTPSL	TOX high mobility group box family member 3;TOX high mobility group box family member 3 (Fragment)	H3BTZ9;O15405	1	0	1	Cancer									1
MAN2A2	DYFDALYKR;FAATHSLEF	Alpha-mannosidase;Alpha-mannosidase (Fragment);Alpha-mannosidase 2x	A0A0C4DGL1;H0YLB9;H0YNG5;P49641	2	0	2	Cancer								1	1
RAD23A;RAD23B	AETPVATSP;DEKNFVVV;DEKNFVVVM;EFLRDQPQF;EFLRNQPQF;FACEKNENL;FEDATSALV;LPALLQQL;NENLAANF;RENPQLLQQI;VTEIMSMGY	UV excision repair protein RAD23 homolog A;UV excision repair protein RAD23 homolog A (Fragment);UV excision repair protein RAD23 homolog B;UV excision repair protein RAD23 homolog B (Fragment)	A0A494C0B4;H0Y579;K7ELW1;K7ENJ0;K7EQ16;P54725;P54727;Q5W0S4;Q5W0S5	11	3	6	Both				1	1	1	2	3	1			3	1	1
4;RAPGEF2;RAPGEF6	DLPDQVLRVF;EHSVVDPTF;FAIISGLNL;FLEEFEKNL;HPDGKVENL;LPDQVLRVF;QSCYIIISK;RYSGNQVLF;SFDSVPVSL;TEQEKSGVP;TPDLPDQVL;YIEDFLLTY;YPDGKAEIL	Rap guanine nucleotide exchange factor 2;Rap guanine nucleotide exchange factor 2 (Fragment);Rap guanine nucleotide exchange factor 6;Uncharacterized protein	A0A2R8Y661;A0A2R8YGD3;B7Z7Y1;D6RE77;E9PCH4;H0Y8H7;H0YAJ8;Q8TEU7;Q9Y4G8	13	2	7	Both			1			2	2	1	1		1	2		5	4
CTNNAL1	FALDSGLEI;QAVNLAVGR	Alpha-catulin	Q5JTQ6;Q9UBT7	2	1	1	Both		1							1
TEFM	EISSIISKM;FAQDGQHQVL	Transcription elongation factor, mitochondrial	Q96QE5	2	0	3	Cancer							1		1			1
PTEN	FEDHNPPQL;VEEPSNPEA	Phosphatidylinositol 3,4,5-trisphosphate 3-phosphatase and dual-specificity protein phosphatase PTEN	P60484	2	0	2	Cancer	+						1		1
RRP7A;RRP7BP	FEEDKQRIEL;HPVKSGIHKW	Putative ribosomal RNA-processing protein 7 homolog B;Ribosomal RNA-processing protein 7 homolog A	Q9NSQ0;Q9Y3A4	2	0	2	Cancer								1	1
TFDP1;TFDP2	EVALATGQF;FEIHDDIEVL;QELLLQQI;SEFTNSNNHL;VADELVSEF	Transcription factor Dp-1;Transcription factor Dp-2;Transcription factor Dp-2 (Fragment)	C9J461;C9J872;C9J977;H7C5C2;Q14186;Q14188	5	0	3	Cancer								1	2			2
SLC18A3	FISFGSLVA	Vesicular acetylcholine transporter	Q16572	1	1	3	Both						1			1	1	1
LYPLA2	FLEKLLPPV	Acyl-protein thioesterase 2	Q5QPQ0;O95372	1	1	1	Both			1						1
P2RX1	FLFEYDTPRM	P2X purinoceptor 1	I3L3H3;P51575	1	0	1	Cancer									1
M6PR	FLYQRLVVGA	Cation-dependent mannose-6-phosphate receptor;Cation-dependent mannose-6-phosphate receptor (Fragment)	H0YFY9;H0YFL0;H0YGT2;H0YF90;P20645	1	0	1	Cancer									1
ERI1	FSDPVYKEI	3'-5' exoribonuclease 1	E5RIV7;Q8IV48	1	0	1	Cancer									1
RPS27;RPS27L	FSHAQTVVL	40S ribosomal protein S27;40S ribosomal protein S27-like	C9J1C5;C9JLI6;H0YMV8;Q71UM5;P42677	1	0	2	Cancer									1			1
ZSCAN21	FSHSSNLTL	Zinc finger and SCAN domain-containing protein 21	G3V1M0;Q9Y5A6	1	0	1	Cancer									1
1;CLN3	FSHSVGTSL;YIVPLVVVY	Battenin;Battenin (Fragment);Uncharacterized protein (Fragment)	A0A024QZB8;A0A0A0MRC7;A0A0D9SFH9;A0A1B0GUX3;A0A1B0GV41;A0A1B0GV71;A0A1B0GW34;A0A1B0GW90;A0A1B0GWD3;A0A1B0GWH9;B4DFF3;F6TI76;H3BMN4;H3BNK7;H3BR00;H3BR84;O95086;Q13286;Q2TA70;Q9UBD8	2	0	3	Cancer							1		1			1
RBP7	FTIHTNSSL	Retinoid-binding protein 7	Q96R05	1	0	1	Cancer									1
PICALM;SNAP91	ATTHEIMGPK;AYNEGIINLL;FLDKSGLQGY;FPQYAPPVM;GADGVMRTM;GTTKNDVNW;IVDSGGGLL;KEGLDIYKKF;KSLITTHHL;QHSVTGSAV;SRYLNEKAV;SVTGSAVSK;VYGNERFIQYL	Clathrin coat assembly protein AP180;Clathrin coat assembly protein AP180 (Fragment);Phosphatidylinositol-binding clathrin assembly protein;Phosphatidylinositol-binding clathrin assembly protein (Fragment)	E5RGY9;E9PDG8;E9PI56;E9PJT1;E9PK13;E9PKP6;E9PLJ8;H0YCY1;H0YD48;H0YE97;H0YEF7;H0YEH1;H0YEY8;O60641;Q13492	13	2	5	Both			1		3			2	3		1			4	4
MISP	AVIQGQAVRK;GAFGKPSSL	Mitotic interactor and substrate of PLK1	Q8IVT2	2	0	2	Cancer									2						1
TIMM8B	AELQRLVAA;GEADEAELQRL	Mitochondrial import inner membrane translocase subunit Tim8 B	E9PIR3;G3XAN8;Q9Y5J9	2	1	1	Both		1							1
IFT20	GEAGLHFDEL	Intraflagellar transport protein 20 homolog;Intraflagellar transport 20 homolog (Chlamydomonas), isoform CRA_b;Intraflagellar transport protein 20 homolog (Fragment)	J3QRH2;A0A087X2B4;J3KRU2;J3QR43;J3QRC6;Q8IY31	1	0	1	Cancer									1
NCAM2	GEDEKQAFLQV	Neural cell adhesion molecule 2	H9KV31;O15394	1	0	1	Cancer									1
DYNC1LI2	GEDGSGKTTL	Cytoplasmic dynein 1 light intermediate chain 2;Cytoplasmic dynein 1 light intermediate chain 2 (Fragment)	H3BUM4;O43237	1	0	1	Cancer									1
ACOT13	GEDIVITAHVL	Acyl-coenzyme A thioesterase 13	Q9NPJ3	1	0	1	Cancer									1
EIF5A;EIF5AL1	AVAIKAMAK;EEILITVL;GEEILITVL;GEVREDLRL	Eukaryotic translation initiation factor 5A (Fragment);Eukaryotic translation initiation factor 5A-1;Eukaryotic translation initiation factor 5A-1-like	I3L397;I3L504;P63241;Q6IS14	4	1	3	Both				1				2	3						1
CD276	AFVCWRKIKQ;GEGEGSKTAL	CD276 antigen;CD276 antigen (Fragment)	A0A0C4DGH0;H0YL10;H0YN29;Q5ZPR3	2	0	2	Cancer								1	1
RPA3	GEGKNGTIEL	Replication protein A 14 kDa subunit	B5MC59;P35244	1	0	1	Cancer									1
PTPRE	DVFEFVSRI;GEITIEIKNDTL	Receptor-type tyrosine-protein phosphatase epsilon	P23469;S4R2Y5	2	0	3	Cancer							1		1			1
SMNDC1	GENEDLLKL;IADKPMTQY;SIFASPESVTGK	Survival of motor neuron-related-splicing factor 30	O75940	3	1	3	Both					1		1	1	1
4;RAB5A;RAB5B;RAB5C	ASKRAVEF;FHEFQESTI;FHEYQESTI;GESAVGKSSL;GESAVGKSSLVL;HEYQESTIGAAFL;VEFQEAQAY;YADDNSLLF	Ras-related protein Rab-5A;Ras-related protein Rab-5B;Ras-related protein Rab-5B (Fragment);Ras-related protein Rab-5C;Ras-related protein Rab-5C (Fragment);Uncharacterized protein;Uncharacterized protein (Fragment)	F8VPW9;F8VSF8;F8VUA5;F8VVK3;F8VVZ0;F8VWU4;F8VWZ7;F8WCY6;F8WD79;K7ENY4;K7ERI8;K7ERQ8;P20339;P51148;P61020	8	1	5	Both		1					2	2	3			2		2
SLX1A;SLX1B	GETAFAFHL	Structure-specific endonuclease subunit SLX1;Structure-specific endonuclease subunit SLX1 (Fragment)	H3BRR6;Q9BQ83	1	0	1	Cancer									1
IMPA2	GETDLSKALVL	Inositol monophosphatase 2	O14732	1	0	1	Cancer									1
CCNB1;CCNB2	GEVDVEQHTL;KTTNVNKQL;SQIREMETL;VVMVNQGLTK	Cyclin B2;G2/mitotic-specific cyclin-B1;G2/mitotic-specific cyclin-B1 (Fragment);G2/mitotic-specific cyclin-B2	E9PC90;H0YA62;H0YMP3;H1UBN3;O95067;P14635	4	1	3	Both			1					1	1					1
1;TJP1;TJP2	EHAFAVQQL;EHDKTLYRI;EVMDEFDGRSF;FENKPPAHI;FPAYERVLL;FPAYERVVL;GEVFRVVDTL;GLEEGDQIL;HEGDIILKI;IIDQDKHAL;IIEQDKHAL;IWEQHTVTL;KVAAIVVKR;NHHLFTTTI;NIQEGDVVL;PPLDQDDRAF;QEGDQILKV;QEGDVVLKI;QENDRVAMV;QENDRVVMV;RGYYGQSAR;SEIESNRSF;YEDRVPMY;YTDQFSRNY;YYRKQLSYF	Tight junction protein 1 (Zona occludens 1), isoform CRA_a;Tight junction protein 1 (Zona occludens 1), isoform CRA_d;Tight junction protein 1 (Zona occludens 1), isoform CRA_e;Tight junction protein ZO-1;Tight junction protein ZO-1 (Fragment);Tight junction protein ZO-2;Tight junction protein ZO-2 (Fragment);Uncharacterized protein	A0A087X0K9;A0A1B0GTW1;A0A2R8YDH4;A0A3B3IRI3;A0A3B3IRV6;A0A3B3IS03;A0A3B3ISF1;A0A3B3ISZ5;A0A3B3IT83;A0A3B3ITE1;A0A3B3IU26;A0A3B3IU51;B1AN86;G3V1L9;G5E9E7;H0YKB1;H0YLT6;Q07157;Q9UDY2;U3KQJ2	25	3	8	Both		4	2		1		3	3	1		2	10	1	7	2
BAZ2A;BAZ2B	AEKEMTSVV;EELEQRVIM;FPDQNFEVM;GEVQDLLVRL;KEEVTKAKP;KQFPEVIKY;KTLESMSSY;MAYGVEPAL;QHDLSQSAF;QHDLSQSAFL;RQYPEVIKY;SQMLRAVSL;STPLAGLAPK;TPEWVQLSA	Bromodomain adjacent to zinc finger domain protein 2A;Bromodomain adjacent to zinc finger domain protein 2A (Fragment);Bromodomain adjacent to zinc finger domain protein 2B;Bromodomain adjacent to zinc finger domain protein 2B (Fragment)	A0A0A0MR97;A0A0C4DGI9;F8VU39;H0YHL2;H0YII3;H7BXK5;H7C092;J3KPG5;Q9UIF8;Q9UIF9	14	1	7	Both		1					3	1	1			3	1	3	3
CHADL	GIAELEAGAL	Chondroadherin-like protein;Chondroadherin-like protein (Fragment)	H0Y4I5;Q6NUI6	1	0	1	Cancer									1
MEDAG	AELPFPSVL;GLSNSVVKV	Mesenteric estrogen-dependent adipogenesis protein	Q5VYS4	2	0	1	Cancer									2
FCER1G	GLSTRNQETYET;TRNQETYETL	High affinity immunoglobulin epsilon receptor subunit gamma	P30273	2	0	2	Cancer							1		1
MYL6;MYL6B	AEFKEAFQL;AEFKEAFQLF;AEIRHVLVT;AEIRHVLVTL;DEMNVKVL;DYVEGLRVF;EAFVRHIL;FTEDQTAEF;GQNPTNAEVLK;TEDQTAEF;YEELVRMV;YEELVRMVL	Myosin light chain 6B;Myosin light polypeptide 6;Myosin light polypeptide 6 (Fragment)	B7Z6Z4;F8VPF3;F8VXL3;F8VZU9;F8W180;F8W1I5;F8W1R7;G3V1V0;G3V1Y7;G8JLA2;H0YI43;J3KND3;P14649;P60660	12	3	8	Both			1	2		4	1	2	5	1	2	3		2	1
MYOZ1	GTAGQGFSYSK	Myozenin-1	Q9NP98	1	1	2	Both				1					1						1
4;NDUFA11	GTFLEGVAK;SVAGLTAAAYR;TAAAVGAVF	NADH dehydrogenase [ubiquinone] 1 alpha subcomplex subunit 11;Uncharacterized protein;Uncharacterized protein (Fragment)	K7EK78;K7EMT4;K7EP35;K7EQ77;Q86Y39	3	1	3	Both		1						1	1						2
MPHOSPH6	GTIGKKFAR	M-phase phosphoprotein 6	H3BSB3;H3BNT4;Q99547	1	1	1	Both						1			1
CA5BP1	GTLSSWNLK	Putative inactive carbonic anhydrase 5B-like protein	Q8WTZ4	1	0	2	Cancer									1						1
MICAL2;MICAL3	AFDIAEKEL;AFDVAEREF;DIRPSKLLTW;EAADFATNY;GVAFIFNQK;IYVPHALAF;LPSSDTLDL;NVTDLTTSW;NYLNLTFPR;SEVPDLPSI;SPLAVDEAL;SPSDADREL;YIDTEMLL	[F-actin]-monooxygenase MICAL2;[F-actin]-monooxygenase MICAL3;[F-actin]-monooxygenase MICAL3 (Fragment)	A0A2R8YFA9;E9PP85;J3KSK6;J3QLA3;J3QQT0;J3QR21;O94851;Q7RTP6	13	3	7	Both		1		1		2	1	3	1		2	3		6	3
MEAF6	GVQDQLIEK	Chromatin modification-related protein MEAF6	B1AK63;Q9HAF1	1	0	2	Cancer									1						1
SLAMF8	HEAAPGKASY	SLAM family member 8	Q9P0V8	1	0	2	Cancer									1		1
PPP3CA;PPP3CB;PPP3CC	EAKGLDRINER;EVGGSPANTR;HEAQDAGYRMY;HNNLLSILR;IEVDAPITV;IEVEAPITV;ILYPKTLFL;LYPKTLFLL;LYPSTLFLL;QEHFSHNTV;QEHFTHNTV;TEMLVNVL	Serine/threonine-protein phosphatase;Serine/threonine-protein phosphatase (Fragment);Serine/threonine-protein phosphatase 2B catalytic subunit alpha isoform;Serine/threonine-protein phosphatase 2B catalytic subunit beta isoform;Serine/threonine-protein phosphatase 2B catalytic subunit beta isoform (Fragment);Serine/threonine-protein phosphatase 2B catalytic subunit gamma isoform;Serine/threonine-…	E5RJH4;E7ETC2;E9PK68;E9PPC8;G3V111;H0YB02;H0YB04;H0YC26;P16298;P48454;Q08209;Q5F2F8;Q5F2G0	12	4	6	Both		1	1	1		4		3	2			4	1	2	1
PHLDB1	HEDAPSTKL	Pleckstrin homology-like domain family B member 1	Q86UU1	1	0	1	Cancer									1
YIPF2	HEFEEATNLL	Protein YIPF2;Protein YIPF (Fragment)	K7EIP7;K7ERW0;K7ENM8;Q9BWQ6	1	0	1	Cancer									1
VTCN1	ALLPLSPYL;HEFKEGKDEL	V-set domain-containing T-cell activation inhibitor 1	Q5T2L0;Q7Z7D3	2	0	1	Cancer									2
TMEM219	HEGLVLTKL	Insulin-like growth factor-binding protein 3 receptor;Insulin-like growth factor-binding protein 3 receptor (Fragment)	I3L4B3;I3L2J7;I3L2P0;Q86XT9	1	0	1	Cancer									1
BATF2	FASHTGSSL;HESLEKDNLAL	Basic leucine zipper transcriptional factor ATF-like 2;Basic leucine zipper transcriptional factor ATF-like 2 (Fragment)	B4DV37;E9PJ73;Q8N1L9	2	0	1	Cancer									2
CEP78	HEVPEKTSI	Centrosomal protein of 78 kDa;Centrosomal protein of 78 kDa (Fragment)	A0A2R8Y589;A0A2R8Y4C1;A0A2R8Y7U5;A8MST6;A0A2U3TZI9;A0A2R8Y5W6;A0A2R8Y432;A0A2R8YCP0;A0A2R8Y7A4;Q5JTW2	1	0	1	Cancer									1
ADAT1	HLLEEPIYL;SIFVPGTQK	tRNA-specific adenosine deaminase 1;tRNA-specific adenosine deaminase 1 (Fragment)	H3BP18;Q9BUB4	2	0	2	Cancer								1	1
ZNF385A	AAAGSPLSL;HTFGGPLLK	Zinc finger protein 385A;Zinc finger protein 385A (Fragment)	F8VRY0;F8VSJ1;F8VWV6;H0YI55;H0YIX3;Q96PM9	2	0	2	Cancer									2						1
EEF2;GUF1	AEMYVAKF;ALFDGVVSK;AYLPVNESF;AYLPVNESFGF;ELKQRARYL;FAEMYVAKF;FTVDQIRAI;GESGPMGNI;GEVSARQEL;GPPDDEAAM;HVDHGKSTL;IEESGEHII;ILTDITKGV;KLIEKLDIKL;KSTAISLFY;KVFDAIMNF;LPAGDALLQM;LPSPVTAQKY;LPVNESFGF;LTDITKGVQY;NEIKDSVVA;NIMIDPVL;QPVEPLPGF;RETVSEESNVL;RVFSGLVSTGLK;RYFDPANGKF;RYLAEKYEW;SEVTAALRV;TAISLFYEL;TETVLRQAI;TPMFVVKAY;TVSEESNVL;VHDVTLHADAI;VLSSSKLIK;YFDPANGKF	Elongation factor 2;Translation factor GUF1, mitochondrial	P13639;Q8N442	35	4	9	Both			2	1	2	7	2	9	5	1	4	10	4	11	7
ATP13A1	ALNALILAY;IAAPFTSKL	Manganese-transporting ATPase 13A1	Q9HD20	2	0	3	Cancer								1	1			1
DGCR8	IEDSRVYEL	Microprocessor complex subunit DGCR8	Q8WYQ5	1	0	1	Cancer									1
ZNF654	IENVIENGS;SEIEQTPLV	Zinc finger protein 654	A0A1B0GWA0;Q8IZM8	2	0	2	Cancer							1		1
COMMD10	EEEKLQAAF;ILAPCKLETV	COMM domain containing 10, isoform CRA_b;COMM domain-containing protein 10;COMM domain-containing protein 10 (Fragment)	D6RC04;D6RJ90;H0Y9N4;Q9Y6G5	2	0	2	Cancer								1	1
DHX15;DHX40	AAMSVAQRV;AEFPLDPQL;FPLDPQLAKMVI;HEVLVTTKV;ILDEAHERTL;LATDILMGV;MPDHVIPEI;NEVLSITAM;REVDDLGPEV;RIFEPPPPK;SLTSVVLTL;SSAKTILKY;TIDGVVFV;TLDAGKFQIY;VADEMDVML;VESLLVTAI;VVFVIDPGFAK	Pre-mRNA-splicing factor ATP-dependent RNA helicase DHX15;Probable ATP-dependent RNA helicase DHX40;Probable ATP-dependent RNA helicase DHX40 (Fragment)	F5H625;J3KSW6;J3KTK0;O43143;Q8IX18	17	4	8	Both			1	2	2	1	1	5	5		1	4	1	3	1
AXIN1	ILDEHVQRV;REMQESVQV;STDPRPASY	Axin-1	O15169	3	2	6	Both	+		1		1		2		1			1	1	1	1
SNRPGP15;SNRPG	IMLEALERV	Putative small nuclear ribonucleoprotein G-like protein 15;Small nuclear ribonucleoprotein G	Q49AN9;F5H013;P62308;A8MWD9	1	2	1	Both			1	1					1
DCSTAMP	ISVGLLSVAA	Dendritic cell-specific transmembrane protein	Q9H295	1	1	1	Both				1					1
DMAC1	ITAPPGTAA	Distal membrane-arm assembly complex protein 1	Q96GE9	1	0	1	Cancer									1
TET3	ITSDPGLSL	Methylcytosine dioxygenase TET3	J3KNF3;O43151	1	0	1	Cancer									1
MCUR1	IVSALVKIL	Mitochondrial calcium uniporter regulator 1	Q96AQ8	1	0	2	Cancer									1						1
ARNTL	IVSTNTVVL	Aryl hydrocarbon receptor nuclear translocator-like protein 1;Aryl hydrocarbon receptor nuclear translocator-like protein 1 (Fragment)	H0YER9;O00327	1	0	1	Cancer									1
PRNT	KAVAVTHSL	Putative testis-specific prion protein	Q86SH4	1	0	1	Cancer									1
GSTO1	KEDPTVSALL	Glutathione S-transferase omega-1;Glutathione S-transferase omega-1 (Fragment)	Q5TA01;Q5TA02;P78417	1	0	1	Cancer									1
TPM2	KEENVEIHQTL	Tropomyosin beta chain	Q5TCU3	1	0	1	Cancer									1
RAB5IF	KEEPPQPQL	Uncharacterized protein RAB5IF	Q9BUV8	1	0	1	Cancer									1
NOL8	HEDPSIISM;KEESTTGNANLL	Nucleolar protein 8;Nucleolar protein 8 (Fragment)	A0A0A0MSJ1;F5GWN9;F5H101;F5H692;F5H797;F5H7D5;F5H8B8;F8WE42;Q76FK4	2	0	1	Cancer									2
HSP90AB1;HSP90AB2P;HSP90AB3P	KEFDGKSLV;KEFDGKSLVSV;LVDTGIGMTK	Heat shock protein HSP 90-beta;Putative heat shock protein HSP 90-beta 2;Putative heat shock protein HSP 90-beta-3	P08238;Q58FF7;Q58FF8	3	1	5	Both	+					2		1	2			2	1	1
SUDS3	KEFEDKKVEL	Sin3 histone deacetylase corepressor complex component SDS3	Q9H7L9	1	0	1	Cancer									1
MFAP5	KEHEAMKDEL	Microfibrillar-associated protein 5;Microfibrillar-associated protein 5 (Fragment)	H0YGS3;B3KW70;F5GYX4;H0YG03;Q13361	1	0	1	Cancer									1
MAGED1;MAGED4	ATYNFSQSL;KEIDKEEHL;SEAPPTNQA;SEAVLWEAL;SVEDSALL;TPESLAGIL	Melanoma-associated antigen D1;Melanoma-associated antigen D4	Q96JG8;Q9Y5V3	6	2	8	Both		1				1	1	1	1	1		2	2	2	1
RSRC1	KEIDPTSIPTAI	Serine/Arginine-related protein 53;Serine/Arginine-related protein 53 (Fragment)	H7C5Q0;Q96IZ7	1	1	1	Both						1			1
RAP2A;RAP2B;RAP2C	AEIVRQMNY;IEVDSSPSV;KEIEVDSSPSVL;SVDELFAEI;VSYGEGKAL	RAP2C, member of RAS oncogene family, isoform CRA_b;Ras-related protein Rap-2a;Ras-related protein Rap-2b;Ras-related protein Rap-2c	A0A087X2C3;F6U784;P10114;P61225;Q9Y3L5	5	1	4	Both						1	1		4			1	1
HSP90AA1;HSP90AA2P;HSP90AB1;HSP90B1	AYQTGKDISTN;DALDKIRLI;ELIGQFGVGFY;HPTDITSLDQY;IADPRGNTL;KEIFLRELI	Endoplasmin;Endoplasmin (Fragment);Heat shock protein HSP 90-alpha;Heat shock protein HSP 90-alpha (Fragment);Heat shock protein HSP 90-alpha A2;Heat shock protein HSP 90-beta	A0A1W2PRR1;F8W026;G3V2J8;H0YIV0;H0YJF5;P07900;P08238;P14625;Q14568;Q96GW1	6	2	6	Both	+			1		1			1		1	3	1	3	1
CEP63	KEILDQLESL;QHAVEAISL	Centrosomal protein of 63 kDa;Centrosomal protein of 63 kDa (Fragment)	H0YAE6;H0YAL1;Q96MT8	2	1	3	Both			1				1		1			1
SQLE	KEPDRIVGEFL	Squalene monooxygenase;Squalene monooxygenase (Fragment)	E5RJH9;E7EVQ6;Q14534	1	0	1	Cancer									1
SSB	EYKNDVKNR;KEWLEDKGQVL;KVEAKLRAK;VETPGQKY	Lupus La protein;Lupus La protein (Fragment)	E7ERC4;E9PFL9;E9PGX9;P05455	4	0	2	Cancer								3	1
RPL36A;RPL36AL	KGKDSLYAQGR;KHFELGGDKKRKGQVIQF	60S ribosomal protein L36a;60S ribosomal protein L36a-like	J3KQN4;P83881;Q969Q0;R4GN19	2	1	1	Both						1			1
CREM	KLIEELETL	cAMP-responsive element modulator;cAMP-responsive element modulator (Fragment)	E9PB41;C9K092;J3KR46;J3KQC0;Q03060	1	0	1	Cancer									1
TGFB1	KTIDMELVKRK;THNEIYDKF;VEQHVELY	Transforming growth factor beta-1 proprotein	P01137	3	0	5	Cancer	+						1	1	1			1			1
TIMD4	KVWDLPSTSHV;TTTSPTTTR	T-cell immunoglobulin and mucin domain-containing protein 4	Q96H15	2	1	2	Both			1					1	1
IGFBP4	AEIEAIQESL;LAAGPGPSL	Insulin-like growth factor-binding protein 4	P22692	2	0	1	Cancer									2
TCAF2;TCAF2C	GEAAFPVMV;LAAHECLLCA	TRPM8 channel-associated factor 2;TRPM8 channel-associated factor 2C (Fragment)	A0A1B0GVM2;A6NFQ2	2	0	2	Cancer									1			1
SNTB1	LADPENRQL;THDEAVQAL	Beta-1-syntrophin	A0A3B3ITC2;Q13884	2	2	4	Both		1	1				1		1			1		1
OR1J1	LAIFTAALTA	Olfactory receptor 1J1	Q8NGS3	1	0	1	Cancer									1
DDI2	GIAKGVGTQK;LANPHELSL	Protein DDI1 homolog 2;Protein DDI1 homolog 2 (Fragment)	H0YI90;H0YII4;Q5TDH0	2	0	2	Cancer								1	1
UBXN8	LAVEGGQSL	UBX domain-containing protein 8	A0A087WUA4;A0A087WV67;A0A087WT23;O00124	1	0	1	Cancer									1
TMEM259	LAVEPGSNL	Membralin;Membralin (Fragment)	U3KQQ5;A0A0A0MTU3;U3KPY4;Q4ZIN3	1	0	1	Cancer									1
AARSD1;PTGES3L-AARSD1	LAVHIAHSL	Alanyl-tRNA editing protein Aarsd1;Alanyl-tRNA-editing protein Aarsd1 (Fragment);PTGES3L-AARSD1 readthrough	K7EQ85;C9J5N1;Q9BTE6	1	0	1	Cancer									1
FBN3	LDSEALLTL	Fibrillin-3	A0A494C0D8;Q75N90	1	1	1	Both			1						1
LAGE3	LEAEIAHGSL	EKC/KEOPS complex subunit LAGE3	Q14657	1	0	1	Cancer									1
PIH1D1	ELQQAQTTR;LEDKYNLQL	PIH1 domain-containing protein 1;PIH1 domain-containing protein 1 (Fragment)	M0QXD5;M0QYA2;M0QYF4;M0QZ61;M0QZM3;M0QZZ1;M0R028;M0R0J2;M0R2P8;M0R3A4;M0R3A8;Q9NWS0	2	0	2	Cancer								1	1
TIMM50	LEQEEQQRL;RLAELSKSNK;SVDPHGFISY;TYKYFKDYR	Mitochondrial import inner membrane translocase subunit TIM50;Mitochondrial import inner membrane translocase subunit TIM50 (Fragment)	M0R003;M0R047;M0R0C3;M0R1Y4;M0R2F8;M0R2Q2;Q3ZCQ8	4	1	5	Both					1		1	2	1				1	1
OXNAD1	LEQERVIEL	Oxidoreductase NAD-binding domain-containing protein 1	U3KQU8;C9JLB7;Q96HP4	1	0	1	Cancer									1
TRMT112	LEVEVIEGTL	Multifunctional methyltransferase subunit TRM112-like protein	F5GYQ2;Q9UI30	1	0	1	Cancer									1
MS4A2	LGSAVSLTI	High affinity immunoglobulin epsilon receptor subunit beta	A0A0B4J2E9;Q01362	1	0	2	Cancer									1			1
LRP8	LIDEQLHSP	Low-density lipoprotein receptor-related protein 8;Low-density lipoprotein receptor-related protein 8 (Fragment)	H0YEA5;H0YEV6;E9PP15;Q14114	1	0	1	Cancer									1
DDX18;DDX54	APDEIPYLL;AVGNIKVTK;DIFSEVVGR;FSATQTRKV;HHAEYLTEL;ILRPEELGFLR;KIFKHISKK;LILSPTREL;NADSGTLL;TEIQHKSI;TELLTTQRV;VEDLARISL;VGLGLHPLF	ATP-dependent RNA helicase DDX18;ATP-dependent RNA helicase DDX18 (Fragment);ATP-dependent RNA helicase DDX54;ATP-dependent RNA helicase DDX54 (Fragment)	F8VRX4;H0YHH7;H7C452;Q8TDD1;Q9NVP1	13	2	6	Both		1				2		1	3			4	1	2	2
ERI3	LLDPNVKSIFV	ERI1 exoribonuclease 3;ERI1 exoribonuclease 3 (Fragment)	F6QUN3;H0Y4B0;F6UGJ8;A0A3B3ISV9;O43414	1	1	1	Both			1						1
TSKS	LLDRALTSL	Testis-specific serine kinase substrate	C9K0I0;Q9UJT2	1	0	2	Cancer									1						1
OR1K1	LLIFTEGAAV	Olfactory receptor 1K1	Q8NGR3	1	0	1	Cancer									1
CMPK2	LLKPDLILL	UMP-CMP kinase 2, mitochondrial	Q5EBM0	1	0	1	Cancer									1
HSPA2;HSPA8;HSPA9	EPTAAALAY;LLDVTPLSL;LLLDVTPLSL;RVINEPTAAALAY	Heat shock cognate 71 kDa protein;Heat shock-related 70 kDa protein 2;Stress-70 protein, mitochondrial	A8K7Q2;E9PKE3;E9PNE6;P11142;P38646;P54652	4	1	3	Both			2					1	2						1
FUCA2;KCNK4	EAIYETHTW;LLPPPPCPA	Plasma alpha-L-fucosidase;Plasma alpha-L-fucosidase (Fragment);Potassium channel subfamily K member 4	Q7Z6V2;Q9BTY2;Q9NYG8	2	0	2	Cancer									1		1
TMEM179	LLVSAFVVFL	Transmembrane protein 179;Transmembrane protein 179 (Fragment)	A0A0G2JNH9;I3L0F2;A0A087X0S3;Q6ZVK1	1	0	1	Cancer									1
ST5	ETVGHYSLF;LPGAGNEVLEL	Suppression of tumorigenicity 5 protein;Suppression of tumorigenicity 5 protein (Fragment)	B4DDL8;E9PKE0;E9PLH5;P78524	2	1	2	Both		1					1		1
GDPD2	LPYQDLPLL	Glycerophosphoinositol inositolphosphodiesterase GDPD2	Q9HCC8	1	0	1	Cancer									1
SBF1;SBF2	DHQQFDFVV;LSDPFYRTL;RYPPDIRATF;RYPQSIFSTF;SVQDNALQR	Myotubularin-related protein 13;Myotubularin-related protein 5	O95248;Q86WG5	5	1	4	Both			1						1			2		2	1
FHOD1	LSKGPGLEV	FH1/FH2 domain-containing protein 1	Q9Y613	1	0	3	Cancer									1		1	1
TCTN2	MRGNSDYADL	Tectonic-2	Q96GX1	1	0	1	Cancer									1
CD300LD	MWLSPSLLL	CMRF35-like molecule 5	Q6UXZ3	1	0	1	Cancer									1
MYH10;MYH11;MYH14;MYH7B;MYH9	AAQKNMALK;ADGAEAKPAE;AEEEAQRANA;AENRLTEMETL;AQQAADKY;AQQAADKYLY;AQQAADKYLYVD;AQQAADKYLYVDKN;AQQAADKYLYVDKNF;AQQAADKYLYVDKNFI;AQQAADKYLYVDKNFINNPLAQAD;ASMPDNTAAQK;ATDKSFVEK;ATDKTFVEK;DEEVDGKADGAEAKPAE;DERRNAEQY;DGSDEEVDGKADGAEAKPAE;EAAQKNMAL;EEKTISAKY;EENRQKLSL;EERTFHIF;EEVDGKADGAEAKPAE;EHLKTDLLL;EIAQKNNAL;ELAAAERAKR;EVDGKADGAEAKPAE;FPNRVVFQEF;GELANEVKV;GKADGAEAKPAE;GSDEEVDGKADGAEAKPAE;GVLQLGNIVFK…	MYH14 protein;MYH9 protein;Myosin-10;Myosin-10 (Fragment);Myosin-11;Myosin-14;Myosin-14 (Fragment);Myosin-7B;Myosin-9;Myosin-9 (Fragment)	A0A087X0T3;A0A2R8Y454;A0A2R8Y4C3;A0A494C024;A1L2Z2;A7E2Y1;B1AH99;E7ERA5;M0QY43;P35579;P35580;P35749;Q5BKV1;Q7Z406	89	5	9	Both		2	5	4	9	5	17	24	17	3	8	10	4	26	20
DDB2	HTLDSYRILQK;NEFNPMGDTL	DNA damage-binding protein 2;DNA damage-binding protein 2 (Fragment)	A0A087WW71;A0A087X0X5;Q92466	2	0	3	Cancer								1	2						1
PFKFB1;PFKFB2;PFKFB4	NEIDAGVCEEMT;SEEGGHVAV	6-phosphofructo-2-kinase/fructose-2, 6-biphosphatase 1 splice variant 3;6-phosphofructo-2-kinase/fructose-2, 6-biphosphatase 4 isoform 1;6-phosphofructo-2-kinase/fructose-2,6-bisphosphatase 1;6-phosphofructo-2-kinase/fructose-2,6-bisphosphatase 2;6-phosphofructo-2-kinase/fructose-2,6-bisphosphatase 4;6-phosphofructo-2-kinase/fructose-2,6-bisphosphatase 4 (Fragment)	C9JX77;C9K0D8;I1Z9G3;O60825;P16118;Q16877;Q66S35	2	0	2	Cancer									1			1
PYGB;PYGL;PYGM	AENISRVLY;DLFKDIINM;FPDKVAIQL;FPDQVAIQL;HPALAIPEL;IEAVLDRNL;IEEEGSKRI;KSFNRHLHF;KWLDTQVVL;LSNESNKVNGN;NLAENISRV;PEFMLPVHF;SSDRTITEY;TVRDHLVGR;WPVDLVEKL	Alpha-1,4 glucan phosphorylase;Alpha-1,4 glucan phosphorylase (Fragment);Glycogen phosphorylase, brain form;Glycogen phosphorylase, liver form;Glycogen phosphorylase, muscle form	E9PK47;H0Y4Z6;P06737;P11216;P11217	15	3	7	Both			1		1	4	1	3	2		1	3		4	4
AMN1	NLTDGAVEAVL	Protein AMN1 homolog;Protein AMN1 homolog (Fragment)	F5H7U5;F5H3D1;F5H1R2;Q8IY45	1	0	1	Cancer									1
KCTD10;TNFAIP1	PEARIYEETL;YEETLNILL	BTB/POZ domain-containing adapter for CUL3-mediated RhoA degradation protein 2;BTB/POZ domain-containing adapter for CUL3-mediated RhoA degradation protein 3;BTB/POZ domain-containing adapter for CUL3-mediated RhoA degradation protein 3 (Fragment)	B3KVY5;F5GWA4;F5GWK6;F5GY15;F5H268;Q13829;Q9H3F6	2	0	1	Cancer									2
SUMO1	IADNHTPKEL;QEAKPSTEDL	Small ubiquitin-related modifier 1;SMT3 suppressor of mif two 3 homolog 1 (Yeast), isoform CRA_b	B8ZZ67;B8ZZJ0;B8ZZN6;B9A032;P63165	2	0	1	Cancer									2
UBE2R2	QEEPVEGFRITL	Ubiquitin-conjugating enzyme E2 R2	Q712K3	1	0	1	Cancer									1
SSU72	FEEKSGRTFL;NVYDFKTTY;QEFEEKSGRTF;QEFEEKSGRTFL;RSMEAHNILSK	RNA polymerase II subunit A C-terminal domain phosphatase SSU72	Q9NP77	5	0	5	Cancer							1	1	4			1			1
PEX19	QEFTSCLKETL	Peroxisomal biogenesis factor 19;Peroxisomal biogenesis factor 19 (Fragment)	Q5QNY5;P40855	1	0	1	Cancer									1
GLA	QEIGGPRSY	Alpha-galactosidase A;Alpha-galactosidase	A0A3B3IUC4;P06280	1	0	2	Cancer									1		1
CD209;CLEC4M	KSAEEQNFL;QEIYQELTQL	CD209 antigen;CD209 antigen, isoform CRA_b;CD209 antigen, isoform CRA_j;C-type lectin domain family 4 member M;C-type lectin domain family 4 member M (Fragment)	E7ENS9;H7BXU4;M0QYX2;M0QZ42;M0QZG5;M0R0P0;Q9H2X3;Q9NNX6;X6RB12	2	1	1	Both					1				1
PTPN11;PTPN6	DQVTHIRI;DRDGTIIHL;EHDTTEYKL;ESEYGNITY;FYDLYGGEKF;HDTTEYKL;LPFDHSRVI;NSGDFYDLY;NTERTVWQY;QENSRVIVM;QESEDTAKAGF;QESLPHAGP;QINQRQESL;RYTVGGLETF;SAAHDYTL;SEDTAKAGF;TEAQYKFIYV;VPYWPEVGM	Tyrosine-protein phosphatase non-receptor type 11;Tyrosine-protein phosphatase non-receptor type 11 (Fragment);Tyrosine-protein phosphatase non-receptor type 6;Tyrosine-protein phosphatase non-receptor type 6 (Fragment)	A0A0U1RRI0;F5GY79;F5H0N8;F5H1Z8;F5H5H9;P29350;Q06124	18	5	6	Both		1	2	2	1	3	6		2		2	3		4	3
ABT1	QEPLEGTEQTL	Activator of basal transcription 1	Q9ULW3	1	0	1	Cancer									1
GATAD2A;GATAD2B	AESPASRQA;AESPASRQAA;ASATALVSR;GVLHTFSPSPK;IEQRLQQQA;QEQEIEQRL;TPSPDIIVL	Transcriptional repressor p66-alpha;Transcriptional repressor p66-beta;Transcriptional repressor p66-beta (Fragment)	A0A0U1RR30;A0A0U1RR34;A0A0U1RRK3;A0A0U1RRM1;Q86YP4;Q8WXI9	7	1	7	Both		1					3	1	1	1	1			1	1
TBC1D13	EVVERILFI;QEQNIKPQFF	TBC1 domain family member 13	Q9NVG8	2	1	3	Both		1					1		1			1
TMEM176A	QESALAKLLL	Transmembrane protein 176A	Q96HP8	1	0	1	Cancer									1
2;TPT1	ETSFTKEAY;NHHLQETSF;QETSFTKEA;QETSFTKEAY	TPT1-like protein;Translationally-controlled tumor protein;Translationally-controlled tumor protein (Fragment)	A0A0B4J2C3;E9PJF7;J3KPG2;P13693;Q56UQ5;Q5W0H4	4	2	4	Both		1	1				3		1		1	1
SP100;SP140L	EVKGTLYKER;FEKDFKEVF;FSDVNMQEY;FTEDQGVDDRLLY;GEVPESPEA;HSHDLQRMF;QEYPDLIHI;QEYPDLIHIY;STFRESFKK;VYDTVFKHF	Nuclear autoantigen Sp-100;Nuclear autoantigen Sp-100 (Fragment);Nuclear body protein SP140-like protein	C9JBL0;E9PHV6;H7BYP4;H7C1G8;H7C4B4;P23497;Q9H930;U5Y3L1	10	2	7	Both					2	1	3	3	2			2	2	3	2
CTSL;CTSL3P	EEFRQVMNGF;KVFQEPLFY;MIELHNQEY;NPTLILAAF;QEYREGKHSF;QVMNGFQNR;VAIDAGHESFL	Cathepsin L1;Putative inactive cathepsin L-like protein CTSL3P	P07711;Q5NE16;Q5T8F0	7	1	4	Both					2			2	5		1				2
SH3RF3	QVAVDALLQ	E3 ubiquitin-protein ligase SH3RF3	Q8TEJ3	1	0	1	Cancer									1
SCNM1	HLSSLQLFY;RALDHYLTL	Sodium channel modifier 1	Q9BWG6	2	0	3	Cancer								1	1				1
AMPH;BIN1;BIN2	DQAVRTMEI;EEPVEEAVI;EIKERIAKR;GLFAKQVQK;IHNQNPEEL;LLEELPILY;LPAVVVETF;RAQEKVLQK;TYLGQFPDI;VASEPGEAK;VSETLQEIY	Amphiphysin;Bridging integrator 2;Bridging integrator 2 (Fragment);Myc box-dependent-interacting protein 1	A0A087X188;A0A0A0MT10;O00499;P49418;Q9UBW5;S4R3J0;S4R418	11	2	6	Both			1		2		1	2	2			1		1	4
CTBS	REIEGSQVTF	Di-N-acetylchitobiase	Q01459	1	0	1	Cancer									1
NCKAP5L	RELEAENSAL	Nck-associated protein 5-like	Q9HCH0	1	0	1	Cancer									1
EMC7	HELPDVSEF;LVDGEEHVGF;REMEQSMNML	ER membrane protein complex subunit 7;ER membrane protein complex subunit 7 (Fragment)	H0YDT8;H0YDX2;Q9NPA0	3	0	2	Cancer								2	1
MNT	REQEQKKANSL	Max-binding protein MNT	Q99583	1	0	1	Cancer									1
SNAPIN	GIYPPGSPGK;NEDQKVAL;REQIDNLATEL;SVAKETARR	SNARE-associated protein Snapin	O95295	4	1	2	Both		1						2	1
TAF12	REVDPNEQL	Transcription initiation factor TFIID subunit 12	Q16514	1	0	2	Cancer									1			1
RIPK3	REVELPTEPSL	Receptor-interacting serine/threonine-protein kinase 3	Q9Y572	1	0	1	Cancer									1
PRPF38A	RVCDIILPRL	Pre-mRNA-splicing factor 38A	Q8NAV1	1	0	2	Cancer									1						1
CBX6	ESVLRTQIR;ETVRIINR;RISDVHFSVK;RVFAAESIIKR;SVKPSASASSPK	Chromobox protein homolog 6	B0QXZ6;O95503	5	0	3	Cancer								4	1						1
CLDN16	SAAGVSMAK	Claudin-16	Q9Y5I7	1	0	1	Cancer									1
ATP6V0C	IVALILSTK;SAAMVFSAL;SVMRPEQIMK	V-type proton ATPase 16 kDa proteolipid subunit;V-type proton ATPase proteolipid subunit	H3BNI4;P27449	3	0	4	Cancer								2	2			1			2
SOX4	SAASASAAL	Transcription factor SOX-4	Q06945	1	0	1	Cancer									1
COMMD4	SADKFQVLL	COMM domain-containing protein 4	A0A0B4J287;Q9H0A8	1	0	1	Cancer									1
TIMM23;TIMM23B	DEFILPTGA;GTMTGMLYK;SAFGVIIEK	Mitochondrial import inner membrane translocase subunit Tim23;Putative mitochondrial import inner membrane translocase subunit Tim23B	B4DDK6;O14925;Q5SRD1	3	1	5	Both				1				2	2	1	1				2
TMEM167A	SAIFNFQSL	Protein kish-A	Q8TBQ9	1	0	1	Cancer									1
HSPB7	SASRALPAQD	Heat shock protein beta-7	D3YTC6;Q68DG0;Q9UBY9	1	0	2	Cancer									1						1
EMC6	SEAAVRGNAAVL	ER membrane protein complex subunit 6	Q9BV81	1	0	1	Cancer									1
RBPMS	REPYELTVPAL;SEAEAAKNAL	HCG2043421, isoform CRA_c;RNA-binding protein with multiple splicing;RNA-binding protein with multiple-splicing;RNA-binding protein with multiple-splicing (Fragment)	B4E3T4;E5RFP4;E5RJ31;E5RJD7;H0YBU9;H0YC46;Q93062	2	0	1	Cancer									2
MAGED2;TRO	AEAKARAEI;EAKARAEIRAR;EIDKNDHLY;GLFAGLGGAGASTSGSSGACGFSYK;IASATEVSL;NADPQAVTM;REAPATQASSTTQL;SEAVIWEVL;SYYETSKMKVLKF;TDAATRQIE;TEAAPSQAP;TETKKVSHV;TEVSKTPEA;VEVPETPKA	Melanoma antigen family D, 2, isoform CRA_d;Melanoma-associated antigen D2;Trophinin;Trophinin (Fragment);Trophinin, isoform CRA_c	A0A087X070;B1AKF5;B1AKF6;G5E9N2;Q12816;Q5H907;Q5H909;Q9UNF1	14	3	9	Both		3			1	5	4	2	3	2	1	5	3	3	2
TNPO1;TNPO2	AYILDTLVF;ESQSPDTTIQR;FIISRTQAL;LPHMHNIVEY;SEDEPTRSL;VARSNILTL	Transportin-1;Transportin-2;Transportin-2 (Fragment)	A0A075B780;E7EW37;K7ENW1;K7ESC1;O14787;Q92973	6	3	5	Both		1	1			2			2			2	1	1	1
METTL1	SEDPVVGHL	tRNA (guanine-N(7)-)-methyltransferase;tRNA (guanine-N(7)-)-methyltransferase (Fragment)	H0YIH0;Q9UBP6	1	0	1	Cancer									1
CYREN	SEEEDSGKQAL	Cell cycle regulator of non-homologous end joining	Q9BWK5	1	0	1	Cancer									1
YWHAZ;YWHAE	SEESYKDSTL	14-3-3 protein zeta/delta;14-3-3 protein epsilon;14-3-3 protein zeta/delta (Fragment);14-3-3 protein epsilon (Fragment)	B7Z2E6;H0YB80;B0AZS6;E7EX29;P63104;K7EM20;P62258	1	0	1	Cancer									1
DIP2A;DIP2B;DIP2C	ETIVNVLDF;FYDERIVVV;HRDQRDVSL;SEGDITQKGY;SVMGVTVSR;TADGVPVSSR;TEDKNSALTV;VYPPGVDLI	Disco-interacting protein 2 homolog A;Disco-interacting protein 2 homolog B;Disco-interacting protein 2 homolog C;Disco-interacting protein 2 homolog C (Fragment)	A0A0U1RQW6;A0A494C143;E7EPU2;H0Y5A8;Q14689;Q9P265;Q9Y2E4	8	2	7	Both		2				2	1	1	1		1	1		2	3
RAMP2	RVGRPAALR;SEGGTVKNY	Receptor activity-modifying protein 2	K7EKQ3;O60895	2	1	4	Both				1				1	1		1				1
CFI;4	SEGIVEVKL	Complement factor I;Uncharacterized protein	D6R9Z8;A0A087X0I2;G3XAM2;E7ETH0;A0A2R8Y3M9;P05156	1	0	1	Cancer									1
SLC25A35	SEIAVGHQY	Solute carrier family 25 member 35	Q3KQZ1	1	0	2	Cancer									1		1
ERLIN1;ERLIN2	AEITYGQKV;IEAEKIAQV;IEAEKVAQV;SEIEDAAFL	Erlin-1;Erlin-1 (Fragment);Erlin-2;Erlin-2 (Fragment)	B0QZ43;E5RHW4;E5RJ09;O75477;O94905	4	1	3	Both						1			1			4	1
HS1BP3	DEMDILQY;EALDPLGIMR;EYQILVVTR;SEIEEFYQKL	HCLS1-binding protein 3;HCLS1-binding protein 3 (Fragment)	A0A494C0K6;B5MC96;F6TR53;H7BZZ1;Q53T59	4	1	3	Both		1						3	1	1
TREX1	FSQPKVTEL;SEITGLSTA;SEITGLSTAVL	Three-prime repair exonuclease 1	Q9NSU2	3	1	1	Both		1							2
CSF1R;PDGFRB	AEAMLGPSL;AHADEKEAL;ATFQNTGTYR;DEFLFTPVVV;DPLGGSAAIHLY;FHEDAEVQL;GPVLVITEY;GTFSSVLTL;HADEKEAL;HADEKEALM;HPPDEFLFTPVV;KEDGRPLEL;QHENIVNLL;QSDFHNNRY;RERDYTNLP;RPVSTSSNDSF;RYGDLVDYL;SELKIMSHL;SIFDCVYTV;TFQNTGTYR;THGGPVLVI;VVKPGATVTLR;YTNLPSSSR	Macrophage colony-stimulating factor 1 receptor;Macrophage colony-stimulating factor 1 receptor (Fragment);Platelet-derived growth factor receptor beta;Platelet-derived growth factor receptor beta (Fragment)	E5RH16;E5RII0;E5RJ14;E9PEK4;H0YAL5;P07333;P09619	23	3	8	Both	+	3			1	1	4	5	6	3		5	1	4	6
LASP1	AADEDEVSF;GGYKEPAAPVSIQ;SELQSQVRY;SYGGYKEPAAPVSIQ	LIM and SH3 domain protein 1;LIM and SH3 domain protein 1 (Fragment)	C9J9W2;J3KSN1;Q14847	4	2	4	Both		2	1					2	1	1	1
AP5B1	GTAQLTLLH;QEAPALVRL;SELREPLKVVL	AP-5 complex subunit beta-1	Q2VPB7	3	0	3	Cancer								1	3						1
ORC4	SENVLQVHL	Origin recognition complex subunit 4;Origin recognition complex subunit 4 (Fragment)	C9JGH7;C9J2X8;Q53SE3;O43929	1	0	1	Cancer									1
MZT2B;MZT2A	SEPQDPAAVSL	Mitotic-spindle organizing protein 2B;Mitotic-spindle organizing protein 2A;Mitotic-spindle organizing protein 2A (Fragment);Mitotic-spindle organizing protein 2B (Fragment)	H7BZ50;H7C173;H7C202;A0A494C0V9;B8ZZ87;Q6P582;Q6NZ67	1	0	1	Cancer									1
MYO1H	SESAFVDNL	Unconventional myosin-Ih	A0A140TA25;Q8N1T3	1	0	2	Cancer									1		1
HLA-DQB1;HLA-DQB2;HLA-DRB1;HLA-DRB3;HLA-DRB4;HLA-DRB5	DERAAVDTY;GEYQAVTEL;GEYRAVREL;GEYRAVTEL;GTGLFIYFR;GVVESFTVQR;HFHNQEEY;HPSVTSPLTVEW;NYGVVESF;RVYPEVTVY;SESAQSKML;VEHPSVMSP;VEHPSVTSP;VLSSPLALA;VLSSRLAFA;VTSPLTVEW;YHQEEYVRF;YPGSIEVRW	HLA class II histocompatibility antigen DQ beta chain;HLA class II histocompatibility antigen, DQ beta 1 chain;HLA class II histocompatibility antigen, DQ beta 2 chain;HLA class II histocompatibility antigen, DR beta 3 chain;HLA class II histocompatibility antigen, DR beta 4 chain;HLA class II histocompatibility antigen, DR beta 5 chain;HLA class II histocompatibility antigen, DRB1-1 beta chain;H…	A0A0D5XQ77;A0A0G2JH31;A0A0G2JJQ8;A0A0U5Q247;A0A140T8Z5;A0A140T958;A0A140T9S8;A0A182DWH4;A2ADX3;P01911;P01912;P01920;P04229;P05538;P13760;P13761;P13762;P20039;P79483;Q29974;Q30134;Q30154;Q30167;Q5SR05;Q5SU54;Q5Y7A7;Q5Y7D3;Q5Y7D6;Q95IE3;Q9GIY3;Q9TQE0;X5D2U9	18	2	8	Both		3	2				2	3	4		1	6	1	3	1
TTC7A	AELFMEQQHL;HPLDYELTY;LEAALQSAY;LPNSIASRF;QHALDVVNM;SEAFVIKGL;SESMATRDVVL	Tetratricopeptide repeat domain 7A, isoform CRA_a;Tetratricopeptide repeat protein 7A;Tetratricopeptide repeat protein 7A (Fragment)	G5E9G4;H7C055;Q9ULT0	7	0	5	Cancer							1	3	3			1			1
TMEM179B	SETDALVGSRL	Transmembrane protein 179B	Q7Z7N9	1	0	1	Cancer									1
SUN1;SUN2	ESGGASVISTR;FYPYGLQTF;GTSSAVSLK;LESGGASVI;LESKILTHV;MAFHQEHEV;QREEMQAQL;REAALKEDF;RELESKILTHV;SESLVHESW;SETYETKTA;SETYETKTAL;SETYETKTALL;SHEDTLALL;SSDAHTSYY;SSRASGLVGR;TAASLLDVF;TLQKEGVIGV;VHHIVKQAL;YETKTALL;YFYPYGLQTF;YSESLVHESW	SUN domain-containing protein 1;SUN domain-containing protein 1 (Fragment);SUN domain-containing protein 2;SUN domain-containing protein 2 (Fragment)	B0QY60;B0QY63;B0QY64;B0QY65;B0QY66;B0QY67;B0QY68;B0QY69;C9JJU6;C9JK55;C9JR15;C9JS54;C9K051;E9PHI4;H0Y686;H0Y6N5;H0Y742;H7C019;H7C2K3;O94901;Q9UH99	22	4	8	Both		1	3		2	6	3	1	3		2	4	1	3	3
AMPD3	GEAGSITHL;RIYDIFRSK;SEVDEQVRL;STDDPMQFHY	AMP deaminase;AMP deaminase 3;AMP deaminase 3 (Fragment)	E9PIR5;E9PKC5;E9PLK6;E9PPG2;H0YDY8;Q01432	4	1	4	Both					1		1	1	2						1
4;CTAGE1;CTAGE15;CTAGE4;CTAGE6;CTAGE8;CTAGE9;MIA2	ASEFQILKY;RLYVGREK;SEVDKTKEEL;THFENENQKL	cTAGE family member 15;cTAGE family member 2;cTAGE family member 4;cTAGE family member 6;cTAGE family member 8;cTAGE family member 9;Melanoma inhibitory activity protein 2;Melanoma inhibitory activity protein 2 (Fragment);Uncharacterized protein	A0A2R8Y569;A0A2R8YE69;A4D2H0;A4FU28;G3V3C4;G3V599;G3V5K6;P0CG41;Q86UF2;Q8IX94;Q96PC5;Q96RT6	4	1	4	Both					1			1	1			1			1
SIGIRR	SEVDVSDLGSRNY	Single Ig IL-1-related receptor;Single Ig IL-1-related receptor (Fragment)	H0YDR5;H0YDF8;Q6IA17	1	0	1	Cancer									1
BLZF1	SEVKNVLEKL	Golgin-45;Golgin-45 (Fragment)	Q5T532;Q9H2G9	1	0	1	Cancer									1
RASA2;RASA3	ETERIYSLFNLY;EVFRTKIVEK;EVFYFEVTR;HPIGDKSFQNY;KYADAVKNF;QEEVFRTKI;SEVQGKVHL;VAVVSPHTF;VEDEGLRVF;VIDDPQETY;YTEDHVFSSDYY	Ras GTPase-activating protein 2;Ras GTPase-activating protein 3	A0A0A0MSJ9;Q14644;Q15283	11	3	7	Both		1			2	1	1	1	1		1	1		4	1
SFT2D2	SEVVEASSL	Vesicle transport protein SFT2B;Vesicle transport protein	Q5TIH2;O95562	1	0	1	Cancer									1
SPTLC2;SPTLC3	DELNHASL;DELNHASLVL;EQKDFVSLY;IVYGQPRTR;KEIDEVGDLL;KEIDEVGDLLQL;LYLDEAHSI;RLPEVIALK;RTHSHSAVY;SGATIRIFK;VIYGQPRTR;VTQNGGLYK	Serine palmitoyltransferase 2;Serine palmitoyltransferase 2 (Fragment);Serine palmitoyltransferase 3	H0YJV2;O15270;Q9NUV7	12	1	6	Both						1		5	3		1	2		2	3
SLC6A14	SILFFFMLLTL	Sodium- and chloride-dependent neutral and basic amino acid transporter B(0+)	Q9UN76	1	0	1	Cancer									1
SPAG7	SILHDVVEV	Sperm-associated antigen 7	I3L0X5;I3L4C3;O75391	1	1	1	Both			1						1
LTK	SLGLGESLYI	Leukocyte tyrosine kinase receptor	P29376	1	0	1	Cancer									1
ANP32B	RESVFKLLP;SLINVGLISV	Acidic leucine-rich nuclear phosphoprotein 32 family member B	Q92688	2	2	2	Both		1	1						1	1
CCNI	AVLTKQLLH;LLDRFLATV;LPLNSVYVY;SLLDRFLATV	Cyclin-I;Cyclin-I (Fragment)	D6RG12;D6RH01;H0YA27;Q14094	4	1	3	Both			2					2	2						2
APOO	SLYSVPEGQSK	MICOS complex subunit MIC26;MICOS complex subunit (Fragment)	G3V1B6;H7C1U8;Q9BUR5	1	0	1	Cancer									1
DNAH3;DNAH6;DNAH7	FTDYFWMEL;KIVAPKKIK;SNDELLEIL	Dynein heavy chain 3, axonemal;Dynein heavy chain 6, axonemal;Dynein heavy chain 7, axonemal;Dynein heavy chain 7, axonemal (Fragment)	H7C362;Q8TD57;Q8WXX0;Q9C0G6	3	0	3	Cancer									1					1	1
IGLC1;IGLC2;IGLC3;IGLC6;IGLC7;IGLL1;IGLL5	AGVETTTPSK;AGVETTTPSKQSN;GVETTTPSKQ;GVETTTPSKQSN;PVKAGVETTTPSKQSN;SNNKYAASSYLSLTPE;SSPVKAGVETTTPSKQSN;STVEKTVAPT;STVEKTVAPTE;VETTTPSKQ;VETTTPSKQSN;VTHEGSTVEK;YPGAVTVAW	Immunoglobulin lambda constant 1;Immunoglobulin lambda constant 2;Immunoglobulin lambda constant 3;Immunoglobulin lambda constant 6;Immunoglobulin lambda constant 7;Immunoglobulin lambda-like polypeptide 1;Immunoglobulin lambda-like polypeptide 5	A0A0B4J231;A0M8Q6;B9A064;P0CF74;P0CG04;P0DOY2;P0DOY3;P15814	13	1	6	Both				3					1		7	8	2	6	3
PRB1;PRB2;PRB4	GPPPPGKPQ;GPPPPPGKPQ;GPPPQGGNQPQ;GPPQQEGNKPQ;SPPGKPQGPPQ;SPPGKPQGPPQQEGNKPQ	Basic salivary proline-rich protein 1;Basic salivary proline-rich protein 2;Basic salivary proline-rich protein 4	A0A0D9SET1;A0A0G2JM13;A0A0G2JMN8;A0A0G2JQ42;A0A0G2JR74;A0A0G2JRP6;E7EXA8;E9PAL0;G3V1M9;G3V1R1;P02812;P04280;P10163	6	0	6	Cancer								2	2	4		1		4	1
MINDY1	SSAPPGPTL	Ubiquitin carboxyl-terminal hydrolase MINDY-1	Q8N5J2	1	0	1	Cancer									1
CALHM6	KATEHATEL;KEWQQISSL;SSLYTFNPK;YTFNPKGQYY	Calcium homeostasis modulator protein 6;Calcium homeostasis modulator protein 6 (Fragment)	Q5R3K2;Q5R3K3	4	1	3	Both					1		1		3			1
C2orf49	SSNLPVNNK	Ashwin	Q9BVC5	1	0	2	Cancer									1						1
MUC22	STEGSEITI	Mucin-22	E2RYF6	1	0	1	Cancer									1
OSER1	DYSQSLHAR;STIASSSSSQLK	Oxidative stress-responsive serine-rich protein 1	Q9NX31	2	0	3	Cancer								1	1						1
GNG5	STNPFRPQK	Guanine nucleotide-binding protein G(I)/G(S)/G(O) subunit gamma-5	P63218	1	0	2	Cancer									1						1
AKT2	DEFTAQSI;KSDGSFIGY;SVAECQLMK	Non-specific serine/threonine protein kinase;RAC-beta serine/threonine-protein kinase;RAC-beta serine/threonine-protein kinase (Fragment)	A0A0A0MRF1;A0A1B0GXA2;A8MX96;C9J258;C9JC83;C9JHS6;C9JIF6;C9JIJ1;E7EVP8;J3KRI8;J3KSY8;J3KTP4;J3QLS6;M0QZK3;M0R0P9;M0R283;P31751	3	0	4	Cancer	+						1	1	1					1
SQSTM1	DEDGDLVAF;EELTMAMSY;FLKNVGESV;GEARPGPTA;KEVDPSTGELQSL;SVCEGKGLHR	Sequestosome-1;Sequestosome-1 (Fragment)	C9JRJ8;E3W990;E7EMC7;E9PFW8;Q13501	6	1	8	Both		1					2	2	2	1		1	1	1	1
4;CHD3;CHD4;CHD5	AEVEENKKM;APLSTIINW;ATNGPPVLVK;EEDYRTLTNY;EMEEKYYRF;GEDSSVIHY;HQHLSKESL;HQHLSKESM;IADGGFTEL;SEDPSHPSM;SEDPSHPSMAL;SEKEFKAYV;SLYKEGHSK;SLYKEGHTK;SVEERITQVAK;TEKEFKAYV;TEVAPPPPP;VTKKTYEIW;YSLQHKLLL	Chromodomain-helicase-DNA-binding protein 3;Chromodomain-helicase-DNA-binding protein 3 (Fragment);Chromodomain-helicase-DNA-binding protein 4;Chromodomain-helicase-DNA-binding protein 4 (Fragment);Chromodomain-helicase-DNA-binding protein 5;Chromodomain-helicase-DNA-binding protein 5 (Fragment);Uncharacterized protein	A0A0C4DGG9;A0A2R8Y212;A0A2R8Y425;A0A2R8Y445;A0A2R8Y4X2;A0A2R8Y521;A0A2R8Y5J0;A0A2R8Y5M9;A0A2R8Y5Z7;A0A2R8Y685;A0A2R8Y795;A0A2R8Y7I0;A0A2R8Y7M9;A0A2R8Y8B3;A0A2R8Y8C1;A0A2R8YD40;A0A2R8YDJ9;A0A2R8YDW2;A0A2R8YE38;A0A2R8YER1;A0A2R8YFD8;A0A2R8YFK9;A0A2U3TZM0;F2Z2R5;F5GWX5;F5H6N4;H7C0J3;H7C2H0;H7C3H7;I3L229;K7EMY3;Q12873;Q14839;Q8TDI0	19	2	8	Both			2			4	1	3	5		2	2	2	1	5
ANAPC16	SVFSYQVASTLK;SVSDLAPPR	Anaphase-promoting complex subunit 16	A0A087WUN5;Q96DE5	2	1	2	Both		1							2						2
TULP3	SVIIPGMTL	Tubby-related protein 3;Tubby-related protein 3 (Fragment)	F5H7B9;O75386	1	0	1	Cancer									1
HIVEP1;HIVEP2	FEDPVSQLI;GHSSLISYL;HEGQRQPQI;HESPKALSI;SVIQHTNSL;VGTVHAQL;YHGSLEESL	Transcription factor HIVEP2;Zinc finger protein 40	F5H212;P15822;P31629	7	1	4	Both						2	1		1			2			1
MAFG	AATSVITIV;ATSVITIVK;REPGENGTSL;SVITIVKSK	Transcription factor MafG;Transcription factor MafG (Fragment)	I3L2F8;O15525	4	1	5	Both		1					1	1	3			1			2
STMN1	AEEKLTHKM;AEKREHEKEVL;ASSDIQVKELEKRASGQ;ASSDIQVKELEKRASGQAF;HEAEVLKQL;SVPEFPLSPPK	Stathmin;Stathmin (Fragment)	A2A2D0;P16949	6	2	6	Both		2	1					1	4	2	1	1			1
MAP7D3	DVSPVVSTY;STFKPVIDGSMLK;SVQSASSTVKK	MAP7 domain-containing protein 3;MAP7 domain-containing protein 3 (Fragment)	A0A0A0MRP0;Q8IWC1	3	1	5	Both		1					1	1	1			1			2
PNRC1	LTEVSQKENY;SVSSDRIQK;TEVSQKENY	PNRC1 protein;Proline-rich nuclear receptor coactivator 1	Q12796;Q49A59	3	0	5	Cancer							1	1	1					1	1
NUS1	SVYDHQGIFK;SVYDHQGIFKR	Dehydrodolichyl diphosphate synthase complex subunit NUS1	Q96E22	2	0	3	Cancer								1	2						1
DOK2	QHVQPAGQDF;TADRDPAGL	Docking protein 2	O60496	2	1	3	Both		1					1		1			1
3;AQP1	SEFKKKLFW;TAILSGITSSL	Aquaporin-1;Aquaporin-1 (Fragment);Uncharacterized protein (Fragment)	A0A494C115;K7N7A8;P29972	2	0	2	Cancer									1		1
SRRM1	TASPPPPPK	Serine/arginine repetitive matrix protein 1;Serine/arginine repetitive matrix protein 1 (Fragment)	M0R088;E9PCT1;A9Z1X7;Q8IYB3	1	0	2	Cancer									1						1
AMDHD2;4	TEDVGSGVAL	N-acetylglucosamine-6-phosphate deacetylase;N-acetylglucosamine-6-phosphate deacetylase (Fragment);Uncharacterized protein (Fragment)	H3BQ15;H3BSD5;H3BT49;H3BTZ6;H3BSV9;A0A3B3IU33;Q9Y303	1	0	1	Cancer									1
ODR4	TEEEVSERVTL	Protein odr-4 homolog	Q5SWX8	1	0	1	Cancer									1
ST8SIA4	DEIHLYGF;TEEHQETQL	CMP-N-acetylneuraminate-poly-alpha-2,8-sialyltransferase	E5RFK3;Q92187	2	0	2	Cancer								1	1
DCTN2	LTDPDGALAK;TEEKLTPVLL	Dynactin subunit 2;Dynactin subunit 2 (Fragment)	F8VW18;F8VX93;F8W1I6;H0YI98;Q13561	2	1	4	Both					1		1		1				1	1
FUZ	TEEPGTGVRL;TSTHFPPVP	Protein fuzzy homolog;Protein fuzzy homolog (Fragment)	E9PK12;E9PS25;Q9BT04	2	0	2	Cancer							1		1
BRF1	ALLPSSPTL;TEFEDTPTSQL	BRF1 protein;Transcription factor IIIB 90 kDa subunit;Transcription factor IIIB 90 kDa subunit (Fragment)	A3KN61;F6VUY7;F8VS45;F8VWT8;H0YIV6;Q3SYD7;Q92994	2	2	1	Both			1	1					2
TBRG4	TEIEDSHTL	FAST kinase domain-containing protein 4;FAST kinase domain-containing protein 4 (Fragment)	C9J7P5;C9IZN7;Q969Z0	1	0	1	Cancer									1
BCL2L13	TEIEEELKSL	Bcl-2-like protein 13	F2Z2C3;A0A087WW80;A0A0A0MR90;E9PDD6;A0A087WTL4;A0A087WX97;Q9BXK5	1	0	1	Cancer									1
SUSD1	EYYNAPLKR;SELPVVISL;TEILTKINDVSL;YQKEFAQEM	Sushi domain-containing protein 1;Sushi domain-containing protein 1 (Fragment)	F8WAQ1;H0Y6B2;H3BLV4;Q6UWL2	4	1	6	Both		1					1	1	2	1		1		1
NUP54	ETIHIRGGVF;TEIRSQQQQL	Nucleoporin p54	Q7Z3B4	2	0	2	Cancer							1		1
TMIGD3	TELIVTDDKGTL	Transmembrane domain-containing protein TMIGD3;Transmembrane domain-containing protein TMIGD3 (Fragment)	A0A0J9YY46;Q5QNY8;P0DMS9	1	0	1	Cancer									1
TLE1;TLE2;TLE3;TLE4	AAYGRSPVV;DAPISPASI;DEFQFLQAQY;DHQRDRDSI;ISNPTRHVY;LPDGRTLIV;NEDPATPRV;QHDFSSQIF;QHDFTSQIF;RTPISITSSY;TEIAKRLNTI;TEMQRHYVMY;TPISITSSY	Transducin-like enhancer of split 4 (E(Sp1) homolog, Drosophila), isoform CRA_d;Transducin-like enhancer protein 1;Transducin-like enhancer protein 1 (Fragment);Transducin-like enhancer protein 2;Transducin-like enhancer protein 2 (Fragment);Transducin-like enhancer protein 3;Transducin-like enhancer protein 3 (Fragment);Transducin-like enhancer protein 4;Transducin-like enhancer protein 4 (Fragm…	A0A0A0MT79;A0A0D9SES8;E7EQH3;F5H7D6;F8WAY5;H0Y5S0;H0YKH0;H0YKH5;H0YKN8;H0YKT5;H0YL70;H0YLI3;H0YLW9;H0YNI7;H0YNT2;H3BUH5;H7C4E4;H7C4P7;H7C4W5;K7EMK7;K7EPD4;K7EPF3;K7ESD8;Q04724;Q04725;Q04726;Q04727;Q5JSY7;Q5JSY8;Q5JSZ1;Q5T3G2;Q5T3G3	13	4	7	Both		2		2	1	1	2	1	1			5	1	1	1
SPDL1	RLSEKQLKH;TESYEQEKYTL	Protein Spindly;Protein Spindly (Fragment)	D6R936;D6RC83;D6REZ1;D6RIB8;D6RIF7;H0YBG5;Q96EA4	2	0	3	Cancer								1	1						1
MILR1	TETDRHITL	Allergin-1;Allergin-1 (Fragment)	A0A087WVL4;Q7Z6M3	1	0	1	Cancer									1
4;ZNF320;ZNF321P;ZNF468;ZNF525;ZNF600;ZNF611;ZNF816-ZNF321P;ZNF845;ZNF888	DEAFAYNSY;GHAAPMTEI;GHEAPMTEI;LHRQASHHI;TEVIHTGTL	HCG1787564;Putative protein ZNF321;Uncharacterized protein (Fragment);Zinc finger protein 320;Zinc finger protein 320 (Fragment);Zinc finger protein 468;Zinc finger protein 468 (Fragment);Zinc finger protein 525;Zinc finger protein 600;Zinc finger protein 611;Zinc finger protein 611 (Fragment);Zinc finger protein 845;Zinc finger protein 888;ZNF816-ZNF321P readthrough	A0A0U1RQK1;A0A0X1KG74;A0A1W2PQH1;A0A3B3IT03;A0A3B3ITH4;A0A3B3ITY9;A2RRD8;J3KR51;J3KR62;M0QX96;M0QYE7;M0QYR0;M0QZA2;M0R2L4;P0CJ79;Q5VIY5;Q6ZNG1;Q8N823;Q8N8H1;Q96IR2	5	0	4	Cancer								1	1			2		1
CAPN7	KSADPLKSK;TEYLERVQAL	Calpain-7	Q9Y6W3	2	0	3	Cancer								1	1						1
SEC11A;SEC11C	AVMGAYVLLK;EGRDIPIVHR;LPASGLDIF;REIPIVHRV;SESPIVVVL;TGSESPIVVVL;VPYIGIVTI	Signal peptidase complex catalytic subunit SEC11;Signal peptidase complex catalytic subunit SEC11 (Fragment);Signal peptidase complex catalytic subunit SEC11A;Signal peptidase complex catalytic subunit SEC11C;Signal peptidase I (Fragment)	A0A0A0MR04;B4DI03;H0YKT4;H0YNA5;H0YNG3;H0YNX5;K7EJQ7;P67812;Q9BY50	7	2	6	Both				1	1			3	3		1	2		1	2
ADGRE2	FSYPAGTEL;TIINSLQGV	Adhesion G protein-coupled receptor E2;Adhesion G protein-coupled receptor E2 (Fragment)	B4DWB8;M0QY55;M0R0K5;Q9UHX3	2	0	1	Cancer									2
CD14	ATVNPSAPR;FPALTSLDL;SLDLSHNSL;TLDGNPFLV	Monocyte differentiation antigen CD14;Monocyte differentiation antigen CD14 (Fragment)	D6RFL4;P08571	4	0	3	Cancer								2	2						2
PTPN2	TLFFQQNAL	Tyrosine-protein phosphatase non-receptor type 2;Tyrosine-protein phosphatase non-receptor type;Protein tyrosine phosphatase, non-receptor type 2, isoform CRA_d	D3DUJ3;K7EQG9;P17706	1	0	1	Cancer									1
TSPAN14	TLISDIEAV	Tetraspanin-14;Tetraspanin	H7BXY6;Q8NG11	1	1	1	Both			1						1
AAAS	NELVTGSSY;TLYEHNNEL	Aladin;Aladin (Fragment)	F8VUB6;Q9NRG9	2	0	2	Cancer								1	1
ZNF526	AEVVAEVA;TTCSKVFKK	Zinc finger protein 526;Zinc finger protein 526 (Fragment)	M0R395;Q8TF50	2	0	2	Cancer							1		1
MT-ND5	TTQLSLSFK	NADH-ubiquinone oxidoreductase chain 5	P03915	1	0	2	Cancer									1						1
JPT1	SEEKPVPAA;TPEENQASW;TTTTTFKGVDPNSRN	Jupiter microtubule associated homolog 1;Jupiter microtubule-associated homolog 1;Jupiter microtubule-associated homolog 1 (Fragment)	F2Z3M5;J3KSH8;J3KT51;Q9UK76	3	0	3	Cancer							1	1	1
DUSP14	QLFGKSTVK;TVADKIHSV	Dual specificity protein phosphatase 14	O95147	2	1	2	Both			1					1	1
CCDC192	TVLELNEKI	Coiled-coil domain-containing protein 192	P0DO97	1	0	1	Cancer									1
INPPL1	DHSPVFGTF;VAAPPPKNSF	Phosphatidylinositol 3,4,5-trisphosphate 5-phosphatase 2	A0A0A0MTP6;O15357	2	1	3	Both		1					1		1			1
IMPDH1;IMPDH2	DEVDLTSAL;FASADGLTY;RVRDVFEAK;SIQDKGSIQK;THEDDKYRL;VAIIARTDL	Inosine-5'-monophosphate dehydrogenase;Inosine-5'-monophosphate dehydrogenase (Fragment);Inosine-5'-monophosphate dehydrogenase 1;Inosine-5'-monophosphate dehydrogenase 1 (Fragment);Inosine-5'-monophosphate dehydrogenase 2;Inosine-5'-monophosphate dehydrogenase 2 (Fragment)	A0A3B3IRL5;C9J029;C9J381;C9K0R9;E7ETK5;H0Y4R1;H7C511;H7C5T1;P12268;P20839	6	1	5	Both						1	1	2	1			1			3
APOLD1	VANVAGSSL	Apolipoprotein L domain-containing protein 1	Q96LR9	1	0	1	Cancer									1
PNO1	VEDALALIRL	RNA-binding protein PNO1	Q9NRX1	1	0	1	Cancer									1
LRCH4	GLRTALEAVK;VEEQRPPEL	Leucine-rich repeat and calponin homology domain-containing protein 4	A0A087X197;C9JYK0;O75427	2	0	2	Cancer									2						1
AHCYL1;AHCYL2	FADDMQEF;KYPNMFKKI;KYPNVFKKI;LPSFDAHLTEL;MPLPGVGEEL;SFDAHLTEL;TFDAHLTEL;THITAQTAVL;VAAALAESGF;VEESVTGVHRL;VYKKYPNVF	Adenosylhomocysteinase (Fragment);Adenosylhomocysteinase 3;Adenosylhomocysteinase 3 (Fragment);S-adenosylhomocysteine hydrolase-like protein 1	C9K0S0;H0Y8B3;O43865;Q96HN2	11	1	6	Both						1	1	3	1			3		7	3
CEBPD	QEMQQKLVEL;VELSAENEKL	CCAAT/enhancer-binding protein delta	P49716	2	0	1	Cancer									2
FBXL19	VGDPSVHLL	F-box/LRR-repeat protein 19;F-box/LRR-repeat protein 19 (Fragment)	H3BPI8;H3BVB1;H3BME1;H7C112;H3BPZ0;Q6PCT2	1	0	1	Cancer									1
NNAT	VGGAQAASP	Neuronatin	A0A3B3ITN5	1	0	1	Cancer									1
DNAJC15	VIAPVGESL;YYKGGFEQK	DnaJ homolog subfamily C member 15	Q9Y5T4	2	0	2	Cancer								1	1
PFDN4	VLADLKVQL	Prefoldin subunit 4	E9PQY2;Q9NQP4	1	1	1	Both			1						1
FCN1	ELSGATMAR;KGYKYSYKVSEMKVRPA;VLFLHIKNLPA	Ficolin-1	A0A087WVE2;O00602	3	1	3	Both		1					1	1	1
FAM92A	DEFAKLQDY;VLLAETELQRAAMDASRTSRHLEE	Protein FAM92A;Protein FAM92A (Fragment)	A0A087WTS3;A0A0B4J212;A1XBS5;E5RFS7;E5RGD0;E5RGE3;E5RHK0;E5RID3;F8W7P5;H0YC32	2	0	3	Cancer								1	1		1
S100A10	EHAMETMMF;KEFPGFLEN;MEHAMETM;MEHAMETMM;MEHAMETMMF;MEKEFPGF;METMMFTF;VLMEKEFPGF	Protein S100-A10	P60903	8	1	6	Both		2					1	5	1	1		3	1
EDEM2	MPYGTVNLL;VSMPVFQSL;YTVEKREGY	ER degradation-enhancing alpha-mannosidase-like protein 2	Q9BV94	3	0	4	Cancer							1	1	1			1
NREP	VSQEPFPNK	Neuronal regeneration-related protein;Neuronal regeneration-related protein (Fragment)	D6R9Y7;D6R982;D6REJ5;D6RIC9;Q16612	1	0	2	Cancer									1						1
ZC3H11B;ZC3H11A	VSSPKLAPK	Zinc finger CCCH domain-containing protein 11B;Zinc finger CCCH domain-containing protein 11A	A0A1B0GTU1;A0A494C0C4;O75152	1	0	2	Cancer									1						1
ALDOA;ALDOB;ALDOC	ALNDHHVYL;ALSDHHIYL;ASESLFVSNHAY;ATQEAFMKR;DATLNLNAI;DESTGSIA;EEIAMATV;EEIAMATVTAL;EHTPSALAI;EIAMATVTALR;ESTGSIAKR;GEHTPSALAI;GEHTPSALAIM;GETTTQGL;GKYTPSGQAGAA;HEEIAMATV;HEEIAMATVTAL;HHIYLEGTLL;IAMATVTAL;KALSDHHIYL;KELSDIAHRI;LPDGDHDL;LSDHHIYL;MENANVLARY;NTEENRRFY;RALQASALK;RTVPPAVTGITF;SEEEASINL;SEIAQSIV;SEIAQSIVA;SESLFVSNHAY;TEKVLAAVY;TENTEENRRF;TENTEENRRFY;VTEKVLAAVYK	Fructose-bisphosphate aldolase;Fructose-bisphosphate aldolase (Fragment);Fructose-bisphosphate aldolase A;Fructose-bisphosphate aldolase A (Fragment);Fructose-bisphosphate aldolase B;Fructose-bisphosphate aldolase B (Fragment);Fructose-bisphosphate aldolase C;Fructose-bisphosphate aldolase C (Fragment)	A0A087WXX2;A0A3B3IS80;A0A3B3ITZ0;A8MVZ9;C9J8F3;H3BMQ8;H3BPS8;H3BQN4;H3BR04;H3BR68;H3BU78;H3BUH7;J3KPS3;J3KSV6;J3QKP5;K7EKH5;P04075;P05062;P09972	35	5	8	Both		4	3	3	3	3	4	8	10	5	3	8		2	4
TMEM268	VTLAAVSLTL	Transmembrane protein 268	Q5VZI3	1	0	1	Cancer									1
OR10A5	VTLKGNSLII	Olfactory receptor 10A5	Q9H207	1	0	1	Cancer									1
OR6C75	VTLSKGVAVLNT	Olfactory receptor 6C75	A6NL08	1	0	1	Cancer									1
DDTL;DDT	VTVRPGLAM	D-dopachrome decarboxylase-like protein;D-dopachrome decarboxylase	J3KQ18;B5MC82;P30046;A6NHG4	1	0	1	Cancer									1
UCP2	VTYDLIKDALLK	Mitochondrial uncoupling protein 2;Mitochondrial uncoupling protein 2 (Fragment)	H0YFQ0;F5GX45;H0YFR8;P55851	1	0	1	Cancer									1
SCN3A;SCN5A;SCN8A	VVNALVGAI	Sodium channel protein type 3 subunit alpha;Sodium channel protein type 5 subunit alpha;Sodium channel protein type 8 subunit alpha;Sodium channel protein type 3 subunit alpha (Fragment);Sodium channel protein	E7EUE6;K4DIA1;A0A0A0MT39;A0A1W2PRD1;E9PHB6;E9PG18;H9KVD2;Q9UQD0;Q9NY46;Q14524	1	0	1	Cancer									1
LSM12	YAISAGVSL	Protein LSM12 homolog	K7ELG9;Q3MHD2	1	0	1	Cancer									1
LILRA6;LILRB1;LILRB2;LILRB3;LILRB5	AEPDSVITQGSPVTL;AEPSIYATL;GLIPDIPAL;LSDPLVLVM;NPSDLLEIL;QSYRHQAEF;SELSDPLVL;SPSDLLELL;SVGPVSPNR;YAQLHSLTL	Leukocyte immunoglobulin-like receptor subfamily A member 6;Leukocyte immunoglobulin-like receptor subfamily B member 1;Leukocyte immunoglobulin-like receptor subfamily B member 1 (Fragment);Leukocyte immunoglobulin-like receptor subfamily B member 2;Leukocyte immunoglobulin-like receptor subfamily B member 2 (Fragment);Leukocyte immunoglobulin-like receptor subfamily B member 3;Leukocyte immunog…	A0A087WSV6;A0A087WSX8;A0A0B4J1W1;A0A0G2JLS4;A0A0G2JLS7;A0A0G2JLT7;A0A0G2JM05;A0A0G2JM46;A0A0G2JMG0;A0A0G2JMM1;A0A0G2JMX5;A0A0G2JMZ3;A0A0G2JN35;A0A0G2JN67;A0A0G2JNB3;A0A0G2JNE7;A0A0G2JNH0;A0A0G2JNM2;A0A0G2JNP3;A0A0G2JNQ6;A0A0G2JNQ7;A0A0G2JNT8;A0A0G2JNY7;A0A0G2JP64;A0A0G2JP80;A0A0G2JPH5;A0A0G2JPM8;A0A0G2JPR9;A0A0G2JPW1;A0A0G2JQ15;A0A0G2JQ25;A0A0G2JQ44;A0A0G2JQ46;A8MVE2;D9IDM5;D9IDM6;F6TER3;F8W6G6;O…	10	4	3	Both			1	1	2	1			4					1	1
WDR77	NETLIVSKF;YEHDDIVSTVSVL	Methylosome protein 50;Methylosome protein 50 (Fragment)	H0Y711;Q9BQA1	2	0	2	Cancer								1	1
ADAM9	AEDFEKLTL;YEIITPWRL	ADAM9 protein;Disintegrin and metalloproteinase domain-containing protein 9	A0AVL1;C9J6H5;C9JPM3;F8WC54;Q13443	2	0	2	Cancer									2			1
IGLV3-27	YELTQPSSVSVSPG;YELTQPSSVSVSPGQ	Immunoglobulin lambda variable 3-27	P01718	2	1	4	Both					2			1	2		1			1
CABIN1	VERIMSETY;YEVQSEAKL	Calcineurin binding protein 1, isoform CRA_c;Calcineurin-binding protein cabin-1	A0A087WWW8;B5MEB3;Q9Y6J0	2	0	2	Cancer								1	1
YPEL1;YPEL2;YPEL3;YPEL4	DELISKSF;GSQGRAYLF;HAFESSQKY;KYIIELNHM;QAFESSQKY;YLFNSVVNV	Protein yippee-like;Protein yippee-like (Fragment);Protein yippee-like 1;Protein yippee-like 2;Protein yippee-like 3;Protein yippee-like 4;Protein yippee-like 4 (Fragment)	A0A0B4J290;E9PNP5;H3BME7;H3BRF0;H3BUE2;O60688;P61236;Q96NS1;Q96QA6	6	1	4	Both			1					1	1					2	2
RASL11A	YLLPKDIKL	Ras-like protein family member 11A	Q6T310	1	0	1	Cancer									1
FAM186B	AELSLVPAP	Protein FAM186B;Protein FAM186B (Fragment)	A0A0C4DGG0;Q8IYM0	1	1	0	Benign			1
CDH9	AGLSTGALVAI	Cadherin-9	Q9ULB4	1	1	0	Benign			1
ATP5F1B	AHLDATTVL;ATSKVALVY;DSGAPIKIPVGPETLGRIM	ATP synthase subunit beta (Fragment);ATP synthase subunit beta, mitochondrial;ATP synthase subunit beta, mitochondrial (Fragment)	F8W079;F8W0P7;H0YH81;H0YI37;P06576	3	2	2	Both		1	1					1							1
3;POLA2	ALIEKLVEL;EEEILLNSY;EEILLNSY;GLTSTDLLFHL	DNA polymerase alpha subunit B;DNA polymerase alpha subunit B (Fragment)	A0A3B3ITS5;E9PIQ6;H0YDR7;Q14181	4	1	2	Both			2					2	1
DCTN3	ALLEQVNAL;IPDASKLQF;VEITEESKALL	Dynactin subunit 3;Dynactin subunit 3 (Fragment)	A0A0A0MRV8;O75935;X6RA56;X6RCK5;X6RLR1	3	1	2	Both			1					1	1
GSKIP	ALLQRLEAL	GSK3B-interacting protein	Q9P0R6	1	1	0	Benign			1
PRDX2	ASGNARIGKPAPD;ASGNARIGKPAPDFKAT;ASGNARIGKPAPDFKATAV;ASGNARIGKPAPDFKATAVVD	Peroxiredoxin 2, isoform CRA_a;Peroxiredoxin-2	A6NIW5;P32119	4	3	5	Both		1	3			1	1	1	1	1		1
THNSL1	AVIEGLASDGGL	Threonine synthase-like 1	Q8IYQ7	1	1	1	Both			1										1
RAB10;RAB12	DFKIKTVEL;KSFENISKW	Ras-related protein Rab-10;Ras-related protein Rab-12	A0A3B3ITT1;P61026;Q6IQ22	2	1	2	Both			1										1	1
RAB1A;RAB1B;RAB8A;RAB8B	DFKIRTIEL;GAHGIIVVY;HASADVEKM;KSFDNIKNW;KSFDNIRNW;METSAKANI;NATNVEQSF;QSTPVKQSGGG	Ras-related protein Rab-1A;Ras-related protein Rab-1B;Ras-related protein Rab-8A;Ras-related protein Rab-8B;Ras-related protein Rab-8B (Fragment)	E7END7;E9PLD0;H0YMN7;H0YNE9;P61006;P62820;Q92930;Q9H0U4	8	1	4	Both			1								1	1		4	3
RAB35	DFKIRTVEI	Ras-related protein Rab-35;Ras-related protein Rab-35 (Fragment)	F5H157;Q15286	1	1	0	Benign			1
HSPB11	AHDGSATYL;DHFASVHSV	Intraflagellar transport protein 25 homolog	Q9Y547	2	2	3	Both		1	1				1					1			1
FGFR4	DIILYASGSL	Fibroblast growth factor receptor 4;Fibroblast growth factor receptor 4 (Fragment)	H0Y9P2;P22455	1	1	0	Benign			1
1;TARDBP	DLIIKGISV;ELREFFSQY;GEVLMVQV;KVMSQRHMI;SEDDGTVLL;TEDELREFF;TEQDLKEYF;TEYETQVKV;YETQVKVM	TAR DNA binding protein, isoform CRA_d;TAR DNA-binding protein 43;TAR DNA-binding protein 43 (Fragment);Uncharacterized protein (Fragment)	A0A087WTZ4;A0A087WV68;A0A087WW61;A0A087WX29;A0A087WX67;A0A087WXQ5;A0A087WXV3;A0A087WYE7;A0A087WYY0;A0A087WZC9;A0A087WZM1;A0A087X260;A0A0A0MSV7;A0A0A0N0M3;A0A1W2PNU8;B1AKP7;G3V162;K7EJ99;K7EJM5;K7EL26;K7EN94;Q13148	9	3	4	Both			1	1		3		3				4	2	2
NDE1;NDEL1	DLLRKVGAL;KSAPSSPTL;QADNQRLKY	Nuclear distribution protein nudE homolog 1;Nuclear distribution protein nudE homolog 1 (Fragment);Nuclear distribution protein nudE-like 1;Nuclear distribution protein nudE-like 1 (Fragment)	A6NIZ0;I3L2R9;I3L2T8;I3L533;J3KRK9;J3QL85;J3QRZ1;J3QSD2;Q9GZM8;Q9NXR1	3	2	1	Both			1		2									1
SPCS3	AEYSTKNNA;AEYSTKNNAL;DMKTKYFFF;NALNQVVLW;VPFPDTYEI	Signal peptidase complex subunit 3	P61009	5	3	3	Both		1	1			1		2	1			1
LAMA1	DVIIKGNGL	Laminin subunit alpha-1	P25391	1	1	0	Benign	+		1
MPO;EPX	EHNRLATEL	Myeloperoxidase;Eosinophil peroxidase	P11678;P05164	1	1	1	Both			1									1
2020-03-06	EHVFWVVSL	E3 ubiquitin-protein ligase MARCH6	O60337	1	1	0	Benign			1
DNAJC8	DVIQAGKEY;EIKKRFRQL	DnaJ homolog subfamily C member 8	O75937	2	2	2	Both			1	1			1					2
DMTN	ELKKKASLF	Dematin	Q08495	1	1	0	Benign			1
AFAP1	ELLKRKEAL;HPSGTALHY;HYDYIDVEM;STDPEALHY	Actin filament-associated protein 1	Q8N556	4	3	6	Both			1		1	1	1	2			1		1	2	2
BCL7C	ERDPGGITA	B-cell CLL/lymphoma 7 protein family member C;B-cell CLL/lymphoma 7 protein family member C (Fragment)	I3L1Q2;Q8WUZ0	1	1	0	Benign			1
1;SARNP	AAEKKVVKI;ERFNVPVSL;GLNVSSISR;SEIPQTERM	SAP domain-containing ribonucleoprotein;Uncharacterized protein (Fragment)	F8VZQ9;H0YHG0;P82979	4	1	3	Both			1					2	1		1
LCMT2	ERIGETPEL	tRNA wybutosine-synthesizing protein 4	O60294	1	1	0	Benign			1
CDK14;CDK17;CDK18	FGLARAKSV;LPESVSIFSL;SEFRTYSF;VEDELHLIF;YPETGVFVI	Cyclin-dependent kinase 14;Cyclin-dependent kinase 17;Cyclin-dependent kinase 18	E7EUK8;F5H6Z0;O94921;Q00537;Q07002	5	2	2	Both			1			1		2						2
KIAA0586	FHADAILSF	Protein TALPID3;Protein TALPID3 (Fragment)	A0A494C133;A0A494C1C3;A0A494C058;A0A494C075;A0A087WYM5;A0A494C0M8;A0A494C171;Q9BVV6	1	1	0	Benign			1
ALG8	FLDPNNIPKA;FSFVRVISL	Alpha-1,3-glucosyltransferase (Fragment);Probable dolichyl pyrophosphate Glc1Man9GlcNAc2 alpha-1,3-glucosyltransferase	E9PK79;E9PKA5;E9PP96;H0YD42;H0YDD3;H0YDQ1;H0YEE0;Q9BVK2	2	1	1	Both			1						1
PLEKHG3	FLFDKTLLI	Pleckstrin homology domain-containing family G member 3;Pleckstrin homology domain-containing family G member 3 (Fragment)	A0A0U1RR71;A1L390	1	1	0	Benign			1
MTMR1;MTMR2	ELQREISNR;FLITILDHL;VRAELQKRV;VYTKTISLW;YPNAELVFL	Myotubularin-related protein 1;Myotubularin-related protein 1 (Fragment);Myotubularin-related protein 2;Myotubularin-related protein 2 (Fragment)	C9JEX3;F8WA39;H0YDX3;Q13613;Q13614	5	1	3	Both			1					1				1		3
GP9	FLLWATAEA	Platelet glycoprotein IX	P14770	1	1	0	Benign			1
ROCK1;ROCK2	AEESQIRIEL;AETKAESEQL;DLQARITSL;EIMNRKEPVKR;FLTDREVRL;GTYSKIMNH;LKSEREKLT;NIDNFLSRY;RYKDTINKI;TAAPVVPEL	Rho-associated protein kinase 1;Rho-associated protein kinase 2;Rho-associated protein kinase 2 (Fragment);ROCK2 protein	A0A0U1RQV4;C9JFJ0;D6REE7;E9PF63;O75116;Q13464;Q14DU5	10	1	5	Both			2				1	2	2					3	3
MIF4GD	EEYKIQSF;FRLAQPDSL	MIF4G domain containing isoform 4;MIF4G domain-containing protein;MIF4G domain-containing protein (Fragment)	A0A3B3IU65;A9UHW6;J3KSB8;J3KSU6;J3QKW3;J3QLD1;J3QLJ5;J3QLN4;J3QRZ6	2	1	1	Both			1					1
EWSR1	AYDTTTATV;FRQDHPSSM;FSGPGENRSM;YTAQPTQGY	EWS RNA-binding protein variant 6;RNA-binding protein EWS;RNA-binding protein EWS (Fragment)	A0A0D9SFL3;B0QYJ3;B0QYJ4;B0QYJ5;B0QYJ6;B0QYJ7;B0QYK0;C9JGE3;F8WC90;Q01844	4	3	6	Both		1	1		1		2	1				1	1	1	1
TOX2	DHEASYHSL;FRSGASPASL	TOX high mobility group box family member 2	Q96NM4	2	1	1	Both			2				1
BHLHE40;BHLHE41	GAAAAAAALLGPDPAAA;GHLEKAVVL;HPSVDSSVL;YPAHMYQVY;YPTSVPVLY	Class E basic helix-loop-helix protein 40;Class E basic helix-loop-helix protein 41	O14503;Q9C0J9	5	2	3	Both			2			1		1						1	3
WASL	GKLLWEQEL;NEEEAKKF	Neural Wiskott-Aldrich syndrome protein	O00401	2	1	1	Both			1					1
ARHGAP15;ARHGAP9	ALYPGQLVQL;GLDVDGIYRV;NHDTLRYLL;RENPLELRL;TSDPAAHAL	Rho GTPase activating protein 9, isoform CRA_a;Rho GTPase-activating protein 15;Rho GTPase-activating protein 9;Rho GTPase-activating protein 9 (Fragment)	F8VW89;H0YI33;H0YI36;J3KPQ4;Q53QZ3;Q9BRR9;R4GN15	5	1	5	Both			2				1		1		1	1		1
CPLANE2	GLLERPVLL	Ciliogenesis and planar polarity effector 2	Q9BU20	1	1	0	Benign			1
GMEB1	GLTSAIQAV	Glucocorticoid modulatory element-binding protein 1	Q9Y692	1	1	0	Benign			1
GTF2F2	GRTEVSFTL	General transcription factor IIF subunit 2	P13984	1	1	0	Benign			1
HIST1H4A;HIST1H4G	AVTYTEHAK;DVVYALKRQGRTLYGFGG;FLENVIRDAV;FLENVIRDAVTY;HAKRKTVTA;KTVTAMDVVYALK;NVIRDAVTY;SGRGKGGKGL;SGRGKGGKGLGK;SGRGKGGKGLGKGGAK;TAMDVVYAL;TAMDVVYALK;TVTAMDVVY;VLRDNIQGITK;VVYALKRQGR;YEETRGVLKV	Histone H4;Histone H4-like protein type G	P62805;Q99525	16	3	5	Both			2		1	3		5	1			2		4	7
CEMIP	HHVPTGPSV	Cell migration-inducing and hyaluronan-binding protein	Q8WUJ3	1	1	0	Benign			1
TRIM11	HLAELIAEL	E3 ubiquitin-protein ligase TRIM11	R4GMV1;Q96F44	1	1	0	Benign			1
ANKRD46	HQGATPLVL	Ankyrin repeat domain-containing protein 46;Ankyrin repeat domain-containing protein 46 (Fragment)	J3KP26;Q86W74	1	1	0	Benign			1
DDHD1	HRYEVVTEL	Phospholipase DDHD1	Q8NEL9	1	1	0	Benign			1
RIMBP2	IDAGITDNS	RIMS-binding protein 2;RIMS-binding protein 2 (Fragment)	A0A2R8YFN7;A0A2R8Y6Z0;O15034	1	1	3	Both			1									1	1	1
TIMP3	IHTEASESL	Metalloproteinase inhibitor 3	P35625	1	1	0	Benign			1
IQCB1	ILDEVIFKL	IQ calmodulin-binding motif-containing protein 1;IQ calmodulin-binding motif-containing protein 1 (Fragment)	C9J6Z7;C9JXD7;Q15051	1	1	0	Benign			1
GNB5	ESDINSVRY;ILFGHENRV	Guanine nucleotide-binding protein subunit beta-5	O14775	2	2	4	Both			1		1		1						1	1	1
MFSD8	ILGPKPQGV	Major facilitator superfamily domain-containing protein 8;Major facilitator superfamily domain-containing protein 8 (Fragment)	A0A286YFB5;A0A286YFF1;E7ERQ4;A0A286YEW8;A0A286YFI9;A0A286YF45;A0A286YFI8;Q8NHS3	1	1	0	Benign			1
PLSCR1;PLSCR2	HPETNLPVGY;ILIHQQIEL;NSFGQRVYF;YPGPQVSY	Phospholipid scramblase;Phospholipid scramblase (Fragment);Phospholipid scramblase 1;Phospholipid scramblase 2	C9J0H3;C9J636;C9J7K9;C9J9P4;C9JE06;F2Z3F2;F8WEZ1;H7C5I5;O15162;Q9NRY7	4	1	2	Both			1				1								2
ASXL2	ILQTLIQRV	Putative Polycomb group protein ASXL2	E7EWD6;Q76L83	1	1	0	Benign			1
DSC1	AVLKPVDPDGPENGPP;KALDPEISSGEGL;KPVDPDGPENGPP	Desmocollin-1	Q08554	3	2	3	Both		2	1					1				1		1
RPL35	KQLDDLKVEL;KSIARVLTV;QLDDLKVEL;RLNKHEENLK;RLNKHEENLKTK;TVINQTQKENLR;VLTVINQTQKENLR	60S ribosomal protein L35	F2Z388;P42766	7	1	3	Both			3				1	4	1
CNTROB	LALVQSEVR	Centrobin	Q8N137	1	1	0	Benign			1
VPS9D1	LANGAIELD	VPS9 domain-containing protein 1	H3BNK1;Q9Y2B5	1	1	0	Benign			1
ZZEF1	ITDHLDTQY;LLDFCTLDIPHCVLLREFSVLTELL;NEATAVLY;TESELQQSY	Zinc finger ZZ-type and EF-hand domain-containing protein 1	O43149	4	2	4	Both			1		1		1	2					1	1
MPP7	LADDLAEEL;LLDVQPHTV	MAGUK p55 subfamily member 7;MAGUK p55 subfamily member 7 (Fragment)	Q5T2T1;S4R337;U5GXS2	2	1	2	Both			1					1							1
ST7	LLEALLELQ	Suppressor of tumorigenicity 7 protein;Suppressor of tumorigenicity 7 protein (Fragment);Suppression of tumorigenicity 7, isoform CRA_b;Suppression of tumorigenicity 7, isoform CRA_d	E7EPW5;G3XAH9;E9PCV1;B7Z4U3;B7Z4L1;E7ENZ9;C9JU30;E7EPD9;H7BXS2;Q9NRC1	1	1	0	Benign			1
TRBV6-3;TRBV6-2;TRBV6-5;TRBV6-9;TRBV6-8;TRBV6-6	LLWAGPVNA	T cell receptor beta variable 6-3;T cell receptor beta variable 6-2;T cell receptor beta variable 6-5;T cell receptor beta variable 6-9;T cell receptor beta variable 6-8;T cell receptor beta variable 6-6;T cell receptor beta variable 6-6 (Fragment);T cell receptor beta variable 6-8 (Fragment)	A0A0J9YYI7;A0A0A6YYG3;P0DPF7;A0A0K0K1A5;A0A0J9YY89;A0A0J9YXY3;A0A0J9YX75;A0A0A6YYG2	1	1	0	Benign			1
TRBV6-1	LLWASPVNA	T cell receptor beta variable 6-1	A0A0K0K1D8	1	1	0	Benign			1
MAGEE2	LVLGHILLN	Melanoma-associated antigen E2	Q8TD90	1	1	0	Benign			1
NPY5R	LVSTLILIS	Neuropeptide Y receptor type 5	Q15761	1	1	0	Benign			1
TNFRSF17	LWTCLGLSL;TEIEKSISA	Tumor necrosis factor receptor superfamily member 17;Tumor necrosis factor receptor superfamily member 17 (Fragment)	H3BMB5;Q02223	2	2	2	Both		1	1				1			1
SUGP1	FGIDRPAEL;FVAEGGPEL;MNILHQEEL	SURP and G-patch domain-containing protein 1;SURP and G-patch domain-containing protein 1 (Fragment)	B4DVK3;K7ELR6;K7EM86;K7ESM0;Q8IWZ8;V9GZ08	3	1	1	Both			1						2
SMIM1	MQPQESHVHY	Small integral membrane protein 1;Small integral membrane protein 1 (Fragment)	H3BS66;A0A2R8Y7R4;B2RUZ4	1	1	0	Benign			1
SHC1;SHC4	FESVSHLI;MPDSGPLPLL;NHHMQSISF;QPVGGDPEV;QYLRNPPKL	SHC-transforming protein 1;SHC-transforming protein 1 (Fragment);SHC-transforming protein 4	H0Y539;P29353;Q5T182;Q5T187;Q5T188;Q6S5L8;X6R6D0	5	2	2	Both			1			1						1		2
SERPINI1	NILFSPLSI	Neuroserpin;Neuroserpin (Fragment)	C9JQU8;C9JDY5;Q99574	1	1	0	Benign			1
PHF20L1	NLLTHIENV	PHD finger protein 20-like protein 1	A0A0A0MQS0;F8W9L8;A8MW92	1	1	0	Benign			1
SNRPA;SNRPB2	GHVVDIVAL;KELGSSTNAL;LPEETNEMM;NHTIYINNL;NQFPGFKEV;RHDIAFVEF;TPSHAMKITY;VEFENDGQAGAARDAL	U1 small nuclear ribonucleoprotein A;U1 small nuclear ribonucleoprotein A (Fragment);U2 small nuclear ribonucleoprotein B''	M0QXK2;M0R0G9;M0R221;M0R268;M0R2B8;P08579;P09012	8	1	5	Both			1				1		2			3		1	1
REL;RELA	APHTTEPML;DSMGETDNPRL;EIIEQPKQR;LEQAISQRI;NRAPNTAEL	Proto-oncogene c-Rel;RELA protein;Transcription factor p65;Transcription factor p65 (Fragment)	A0A087WVP0;A0A087X0W8;E9PI38;E9PKH5;E9PKV4;E9PM47;E9PMD5;E9PN69;E9PNK5;E9PNV4;E9PQS6;Q04206;Q04864;Q2TAM5	5	3	2	Both	+	1	1			2						1		1
4;ARPC1A	NRDRTQIAL;TEDRNTALETL	Actin-related protein 2/3 complex subunit 1A;Uncharacterized protein	A0A1W2PNV4;E9PF58;Q92747	2	1	1	Both			1						1
DOCK1;DOCK2;DOCK5	ADEKAAAESDLKRLS;ADVADVPPP;AEIPLAQEV;AENDFLHSL;AYTLLLHTW;DIIQIRKDYPHL;EDASAYLTL;EHAAIPLKA;ERFLQVQSM;EVQRFEYSR;FENEIILKL;HEIASKQV;HHVENKGATL;HYAHLIKTF;HYSHYISTF;IPDSLSTDL;IYIRYLYKL;KALEYVFKF;KFLEHTNFEF;KMWEEAISL;KSVENFVNL;KYLAKTGETF;KYNKILNKY;LEAYIQQHF;LYQEIIHYF;NYFHLAVAF;SSSPTHSLY;TENIIPAEI;VFLRAINKF;VLHDVEMVF;YVQRFHYSR;YYGQGFPTF	Dedicator of cytokinesis protein 1;Dedicator of cytokinesis protein 2;Dedicator of cytokinesis protein 2 (Fragment);Dedicator of cytokinesis protein 5;Dedicator of cytokinesis protein 5 (Fragment)	A0A096LNH6;A0A3B3IRS9;A0A3B3ISB1;E5RFJ0;E7ERW7;F6S220;H0Y7N4;H0YB76;H7C082;Q14185;Q92608;Q9H7D0	32	4	6	Both			4	1	3	6	2	1	2			14		12	2
RNASE2	PPQYPVVPVHLDRII	Non-secretory ribonuclease	P10153	1	1	0	Benign			1
UBE2O	DSDRGLQEGY;QDEGAEEPHEAGEQLPPFLL;VHHLDNNEF	(E3-independent) E2 ubiquitin-conjugating enzyme;(E3-independent) E2 ubiquitin-conjugating enzyme (Fragment)	K7ES11;Q9C0C9	3	2	3	Both			1		1		2					1		1
KMT2E;SETD5	AHPVSTDSL;DEVPVELY;HHTTSAQAL;KEFVGKPTI;LPLPTPATVY;QEVPEKVTV;QHTPTSITL;SLPDLTTPLK;TPISNEVEM	Histone-lysine N-methyltransferase SETD5;Histone-lysine N-methyltransferase SETD5 (Fragment);Inactive histone-lysine N-methyltransferase 2E;Inactive histone-lysine N-methyltransferase 2E (Fragment)	A0A087WYW5;C9JLA7;C9JLM1;C9JNE1;C9JYI9;E7EWN3;H0Y3R4;H7C1Q2;H7C4F3;Q8IZD2;Q9C0A6	9	2	6	Both			2			1	1	1			1	3		2	2
CTCF	QIITLQVVNM	Transcriptional repressor CTCF;Transcriptional repressor CTCF (Fragment)	A0A2R8Y6Z6;A0A2R8Y6C1;A0A2R8Y595;A0A2R8YFL0;P49711	1	1	0	Benign			1
DCDC2B	QIVEEALSLENQPG	Doublecortin domain-containing protein 2B	A2VCK2	1	1	0	Benign			1
DDX12P;DDX11;DDX11L8	QLAQFVHEV	Putative ATP-dependent RNA helicase DDX12;ATP-dependent DNA helicase DDX11;Putative ATP-dependent RNA helicase DDX11-like protein 8;ATP-dependent DNA helicase DDX11 (Fragment)	F5GXJ8;F6WZM0;F5H235;C9K0E8;B4DMS8;A8MPP1;Q92771;Q96FC9	1	1	0	Benign			1
ERMN;MSN	ASYAVQSKY;HLKALTSEL;KESPLLFKF;LEMAELTARI;QEDLEKTRAEL;QRIDEFESM;SADLRADAM;YPEDVSEEL	Ermin;Moesin;Moesin (Fragment)	B4DIZ1;P26038;Q8TAM6;V9GZ54	8	2	5	Both			2			2			2		1		1	2	1
PSG3;PSG1;PSG7	QSLPMTHSL	Pregnancy-specific beta-1-glycoprotein 3;Pregnancy-specific beta-1-glycoprotein 1;Putative pregnancy-specific beta-1-glycoprotein 7;Pregnancy-specific beta-1-glycoprotein 1 (Fragment)	M0QY44;M0QZQ1;A0A096LNM5;A0A087WT09;M0QX68;Q13046;P11464;Q16557	1	1	0	Benign			1
RPF2	RPFEDQTSL	Ribosome production factor 2 homolog;Ribosome production factor 2 homolog (Fragment)	Q5VXN0;Q9H7B2	1	1	1	Both			1												1
PRRT4	SGEASGPAAPPELPSPG	Proline-rich transmembrane protein 4	C9JH25	1	1	0	Benign			1
GUCY1B1	KAFPFHIIF;SHINTVFVL	Guanylate cyclase 1, soluble, beta 3, isoform CRA_c;Guanylate cyclase soluble subunit beta-1	A0A494C1B9;B7Z685;D6RC99;E9PCN2;Q02153	2	2	4	Both		1	1				1			1	1	1
PSTPIP1	SHIQLALTL	Proline-serine-threonine phosphatase-interacting protein 1;Proline-serine-threonine phosphatase-interacting protein 1 (Fragment)	H0YNS1;B4E1Z9;H0YLI2;H0YLM9;H0YLW8;H0YLX8;J3KPG6;H0YKY3;O43586	1	1	0	Benign			1
GPR151	SLADLSLLL	Probable G-protein coupled receptor 151	Q8TDV0	1	1	0	Benign			1
OSCP1	SLFSNLATI	Protein OSCP1 (Fragment)	H0YAG0	1	1	0	Benign			1
NAA30	SLKSKVLSV	N-alpha-acetyltransferase 30	Q147X3	1	1	0	Benign			1
MAD2L2	EVYPVGIFQKR;SLLSHVEQL	Mitotic spindle assembly checkpoint protein MAD2B;Mitotic spindle assembly checkpoint protein MAD2B (Fragment)	B1AK43;B1AK44;B1AK45;Q9UI95	2	1	1	Both			1					1
CCHCR1	EHAKAVVSL;SLQDKAAEV	Coiled-coil alpha-helical rod protein 1;Coiled-coil alpha-helical rod protein 1 (Fragment)	A0A0G2JHL3;A0A0G2JHL6;A0A0G2JII5;A0A0G2JJ47;A0A0G2JP87;A0A0G2JPU2;A2ABH1;B0S7V6;Q8TD31	2	1	0	Benign			2
CD59;4	SLSEKTVLL	CD59 glycoprotein;CD59 glycoprotein (Fragment);Uncharacterized protein (Fragment)	H0YET2;A0A2U3TZL5;P13987	1	1	0	Benign			1
ARHGEF6;ARHGEF7	DTTAINKSYY;EITGNTVER;ETAPLTKNY;ETAPLTKNYY;GESSSKTSI;HHGTPHTTI;IEETRSNGQTI;KVLSSLVTLNK;QHSDELEQF;SLVDTVYAL	Rho guanine nucleotide exchange factor 6;Rho guanine nucleotide exchange factor 7;Rho guanine nucleotide exchange factor 7 (Fragment)	A0A2R8YG42;B1ALK7;E7ENL8;E7EU80;E7EUY6;E9PDQ5;Q14155;Q15052	10	3	3	Both		3	1			1	3	1				6
COL4A5	SLWGQPAEA	Collagen alpha-5(IV) chain	A0A2R8Y5W0;P29400	1	2	0	Benign	+		1	1
DENND4A;DENND4C	EVILATPYGR;KILSNVISK;KLFDRPQEL;QEIKSAHKI;SHWPFFEAF;SLPESVPLF;SLYREILFL;SRHPTGNSI;TQNPKRIQR;VPASNAIAY	C-myc promoter-binding protein;C-myc promoter-binding protein (Fragment);DENN domain-containing protein 4C;DENN domain-containing protein 4C (Fragment)	A0A0U1RR27;H3BTW5;Q5VZ89;Q7Z401;R4GMN2;X6R5W5	10	3	4	Both		1	1			1					1	3		1	2
SUB1	IGKMRYVSV;SRDDNMFQI	Activated RNA polymerase II transcriptional coactivator p15	P53999	2	1	0	Benign			2
CHP1	EEIKKETGF;SRDELLQVL	Calcineurin B homologous protein 1	F5GX29;H0YKE7;H0YNG9;Q99653	2	1	1	Both			1						1
CD2BP2	AELYGPFTSA;SEGGVRITP;SRFKGKHSL	CD2 antigen cytoplasmic tail-binding protein 2	O95400	3	2	1	Both		1	1				1
MAP7D1	KEQPPAETP;LPFAEAEAF;LSASTASELSPK;RQSLPASPR;SRGPTPPAM;STASELSPK;SVSAVNLPK	MAP7 domain-containing protein 1;MAP7 domain-containing protein 1 (Fragment)	C9JIR3;E9PLH3;H0YF21;Q3KQU3	7	1	5	Both			1				1	5	1					1	3
PTP4A1;PTP4A2;PTP4A3	AINSKQLTY;RPAPVEVSY;RPAPVEVTY;THNPTNATL	Protein tyrosine phosphatase type IVA 1;Protein tyrosine phosphatase type IVA 1 (Fragment);Protein tyrosine phosphatase type IVA 2;Protein tyrosine phosphatase type IVA 2 (Fragment);Protein tyrosine phosphatase type IVA 3;Protein tyrosine phosphatase type IVA 3 (Fragment)	A0A0D9SGK2;A0A3B3ISR8;E5RFQ4;E5RGR3;E9PJC0;E9PML8;E9PMY3;E9PRR9;O75365;Q12974;Q93096	4	1	3	Both			1					1				1			2
NOP10	TIKKRFKVL	H/ACA ribonucleoprotein complex subunit 3	Q9NPE3	1	1	0	Benign			1
CXCR4	TIPDFIFANV	C-X-C chemokine receptor type 4	P61073	1	1	0	Benign			1
CCDC93	AEDKKTALP;EEMGDYIRSY;EIKQIVSEY;REDEEQNVKL;TLDDKKVYL	Coiled-coil domain-containing protein 93	F8W9X7;Q567U6	5	1	2	Both			1				2		2
TAB1	AFDVVERSFL;GEQSVVTAP;TLDEATPTL;YVANVGTNR	TGF-beta-activated kinase 1 and MAP3K7-binding protein 1	Q15750	4	3	2	Both		1	1			1	1	1
MRPS6	TLKRTIEAL	28S ribosomal protein S6, mitochondrial	P82932	1	1	0	Benign			1
SAMSN1	ASDSMDSLY;QEFLERIHL;TLQEFLERI	SAM domain, SH3 domain and nuclear localization signals 1;SAM domain-containing protein SAMSN-1	A0A2R8Y4K8;Q9NSI8;S6FRS6	3	1	3	Both			1				1		1					1
GZMH	DVAQGILSY;TLQEVLLTV	Granzyme H	A0A0C4DGJ9;P20718	2	1	1	Both			1				1
GPKOW	TLWNQELYI;YEAVPVEAY	G-patch domain and KOW motifs-containing protein	Q92917	2	1	1	Both			1					1
CCDC124	PKKFQGENTK;TRAQIEDTL	Coiled-coil domain-containing protein 124;Coiled-coil domain-containing protein 124 (Fragment)	M0R2F5;Q96CT7	2	1	1	Both			1					1
ITGA2B	KLAEVGRVYL;TRNVGSQTL	Integrin alpha-IIb;Integrin alpha-IIb (Fragment)	A0A3B3IU79;P08514	2	1	1	Both	+		2						1
PGP	VDSIADLLPALQG	Glycerol-3-phosphate phosphatase;Glycerol-3-phosphate phosphatase (Fragment)	H3BV17;A6NDG6	1	1	0	Benign			1
MON1B	VHAQIVSTL	Vacuolar fusion protein MON1 homolog B;Vacuolar fusion protein MON1 homolog B (Fragment)	H3BUX9;E7EW32;Q7L1V2	1	1	0	Benign			1
CAVIN3	RRAAQVQRL;SHDTTSNTL;TEEDPGRPGA;VHAVTVVTL	Caveolae-associated protein 3	E9PIE3;Q969G5	4	2	4	Both		2	2				2			1		1		2
CDH13	VHITVLDVNEGP	Cadherin-13	P55290	1	1	1	Both			1							1
NR1H2;NR1H3	VHSEQVFAL	Oxysterols receptor LXR-beta;Oxysterols receptor LXR-alpha;cDNA FLJ56172, highly similar to Oxysterols receptor LXR-alpha	E9PID2;B5MBY7;M0R2F9;M0R0K3;B4DXU5;E9PLL4;Q13133;P55055	1	1	0	Benign			1
CXCR3	VLEVSDHQVLNDAEVA	C-X-C chemokine receptor type 3	P49682	1	1	0	Benign			1
SS18L2	EVNQETIQR;EVNQETIQRL;VLHRNLIYL	SS18-like protein 2	Q9UHA2	3	2	1	Both		2	1					1
IFNAR1	DESVGNVTF;FIIENISTI;VLLGATTLV	Interferon alpha/beta receptor 1;Interferon alpha/beta receptor 1 (Fragment)	A0A494BZU5;A0A494C0E2;A0A494C0K3;A0A494C0P2;C9J114;P17181	3	1	2	Both			1				1	1
ZDHHC24	VLLHVSVLL	Probable palmitoyltransferase ZDHHC24;Palmitoyltransferase	E9PI61;E9PLR9;Q6UX98	1	1	0	Benign			1
CHUK	VLMDHILNL	Inhibitor of nuclear factor kappa-B kinase subunit alpha	O15111	1	1	0	Benign	+		1
EXOC3	DLKTKVLVL;EVSTLVSKY;LEQHLNELM;VLQRSLVTV	Exocyst complex component 3;Exocyst complex component 3 (Fragment)	D6RB59;H0Y995;O60645	4	1	3	Both			2				1		1			1
CCR4	TLDESIYSNY;VLSSLEINI	C-C chemokine receptor type 4	P51679	2	2	2	Both			1		1		1							1
SAMD1	VLTGLSIRL	Atherin;Atherin (Fragment)	F8WDT5;E9PIW9;Q6SPF0	1	1	0	Benign			1
TTC6	QASRLLTDK;VVCLQMGNNF	Tetratricopeptide repeat protein 6;TTC6 protein	G3V3A5;G5E9W5;Q3SY87;Q86TZ1	2	1	1	Both			1					1
TNNI1	YLAERIPTL	Troponin I, slow skeletal muscle;Troponin I, slow skeletal muscle (Fragment)	G3V3L5;G3V489;G3V4F8;A0A087WT47;P19237	1	1	0	Benign			1
INVS	YLDAIKLLL	Inversin	Q9Y283	1	1	0	Benign			1
MROH7;MROH7-TTC4	YLLIPLLER	Maestro heat-like repeat-containing protein family member 7;MROH7-TTC4 readthrough (NMD candidate)	B7ZBM2;F8W8P2;A0A0A0MT08;Q68CQ1	1	1	0	Benign			1
TMEM258	FVYEVTSTKY;YEVTSTKY;YTSPVNPAV	Transmembrane protein 258	F5GWH5;F5H7Z5;P61165	3	1	3	Both			1				1	1				1
HMGN2;HMGN4	AKVKDEPQR;AKVKDEPQRR;DASTLQSQKAEGTGDAK;GDAKTDQAQKAEGAGDAK;RDASTLQSQKAEGTGDAK;TDQAQKAEGAGDAK	High mobility group nucleosome-binding domain-containing protein 4;Non-histone chromosomal protein HMG-17	O00479;P05204	6	3	6	Both		1	3			1	1	4		1		1		3	1
FXYD6	AQVENLITA	FXYD domain-containing ion transport regulator 6;FXYD domain-containing ion transport regulator	E9PJ02;Q9H0Q3	1	0	1	Cancer										1
FAM135A	DEIIQYIQI;DERKIEETL	Protein FAM135A;Protein FAM135A (Fragment)	D6RC17;D6RCC7;H7BXC5;Q9P2D6	2	0	2	Cancer								1		1
ASAH2	EEYQAQRY	Neutral ceramidase	E9PBM9;A0A0C4DFQ8;Q9NR71	1	0	1	Cancer										1
CYP4F8	EGLRVLTQL	Cytochrome P450 4F8;Cytochrome P450 4F8 (Fragment)	A0A087WUC9;P98187	1	0	1	Cancer										1
hCG_2002594;SEPT2;SEPT4;SEPT5;SEPTIN2;SEPTIN4;SEPTIN5	ATLPNQVHR;DCFKTIISY;DEIEEHNIKIY;FISPFGHGL;KESIPFAVI;KVNIVPVIAK;QEVTQDLHY;VEIEERGVKL;YIDEQFERY;YIDQQFEQY;YVDQQFEQY	HCG2002594, isoform CRA_a;HCG2002594, isoform CRA_c;Septin 2;Septin 2 (Fragment);Septin 4;Septin 4 (Fragment);Septin 5;Septin 5 (Fragment);Septin-2;Septin-4;Septin-5	B4DJ62;B5MCX3;B5MD47;C9IY94;C9IZU3;C9J2Q4;C9J938;C9JB25;C9JM82;C9JQJ4;C9JZI2;E7EPG2;E7EQM7;E7EX32;F8W9E5;G3XAH0;H7C299;H7C2Y0;H7C310;J3KSZ7;J3QLA8;J3QLR2;J3QRT6;J3QRU3;O43236;Q15019;Q99719	11	2	9	Both				1	1		2	2	2	1	1	1	2	1	3
CCNG1;CCNG2	FEVKDLLSL;FSKAKPSVL;VYLEQEERF	Cyclin-G1;Cyclin-G1 (Fragment);Cyclin-G2;Cyclin-G2 (Fragment)	D6RCC5;D6RD30;D6RGX3;D6RHI3;E7ERZ1;P51959;Q16589	3	0	3	Cancer										1		3		1
PRB2;PRB1;PRB3	GPPPQGGNKPQ	Basic salivary proline-rich protein 2;Basic salivary proline-rich protein 1;Basic salivary proline-rich protein 3	A0A0D9SET1;A0A0G2JQ42;A0A0G2JRP6;G3V1M9;A0A0G2JMN8;A0A0G2JM13;A0A0G2JR74;P04280;P02812;G3V1R1;F5H7C1	1	0	2	Cancer										1				1
CALD1	DEAAFLERL;EETETVTKSY;EFLNKSVQK;HQAAIVSKI;KEAEGAPQV;KEFDPTITDASL	Caldesmon;Caldesmon (Fragment)	C9J813;C9JEK3;E7EX44;E9PGZ1;Q05682	6	1	8	Both						1	1	2	2	2	2	1	1	1
FSD2	INTIPAPSAPV	Fibronectin type III and SPRY domain-containing protein 2	A1L4K1	1	0	1	Cancer										1
LSM8	IRAEPLNSV	U6 snRNA-associated Sm-like protein LSm8	C9JIZ0;O95777	1	0	2	Cancer										1				1
ZFAND5;ZFAND6	IRKENPVVV;SESVASSQL	AN1-type zinc finger protein 5;AN1-type zinc finger protein 6;AN1-type zinc finger protein 6 (Fragment)	H0YK21;H0YK54;H0YLR2;H0YME2;H0YMR5;H3BM82;O76080;Q6FIF0	2	0	3	Cancer									1	1				1
UAP1	ITADVNHNL	UDP-N-acetylhexosamine pyrophosphorylase	Q16222	1	0	1	Cancer										1
MCCC1	LSMEKIIQV	Methylcrotonoyl-CoA carboxylase subunit alpha, mitochondrial;Methylcrotonoyl-CoA carboxylase subunit alpha, mitochondrial (Fragment)	G5E9X5;E9PG35;Q96RQ3	1	0	1	Cancer										1
FIGLA	MSTTEIISPTR	Factor in the germline alpha	Q6QHK4	1	0	1	Cancer										1
PRDX5	DDSLVSIF;GEWASGGVRSF;MVVQDGIVKA	Peroxiredoxin-5, mitochondrial	P30044	3	0	3	Cancer								1	1	1
RPS9	DEGKMKLDY;GLAKSIHHA;KLIGEYGLRNK;NIPSFIVRL;QELKLIGEY;QELKLIGEYGL	40S ribosomal protein S9	A0A024R4M0;A8MXK4;B5MCT8;C9JM19;F2Z3C0;P46781	6	0	4	Cancer								3	2	1					1
ILF2	KAYEKPPEK;KILPTLEAV;NVIDNLIVA;SEALLKRNQDL;TAQTLVRIL;VQIEEVRQV	Interleukin enhancer-binding factor 2;Interleukin enhancer-binding factor 2 (Fragment)	A0A0A0MRL0;B4DY09;Q12905;X6R6Z1	6	2	6	Both		1	2				1	1	2	2		1		1
UXT	NVIERLQEA	Protein UXT	Q9UBK9	1	0	1	Cancer										1
HMOX1;HMOX2	AENAEFMRNF;ATKFKQLYR;DSAPVETPR;EEAKTAFLL;EVIPYTPAM;EVIPYTPAMQR;EVIPYTPAMQRY;FPNIASATKF;HEVGRTEPEL;HEVGRTEPELL;IEEAKTAFL;IEEAKTAFLL;KIAQKALDL;KYVERIHYI;MPQDLSEAL;PELLVAHAY;SLYHIYVAL;TEPELLVAHAY;TFPNIASATKF;TRDGFKLVM;TRYLGDLSGGQVL;VMASLYHIYV	Heme oxygenase 1;Heme oxygenase 1 (Fragment);Heme oxygenase 2;Heme oxygenase 2 (Fragment)	A0A087WT44;B1AHA8;I3L159;I3L1F5;P09601;P30519	22	3	8	Both		4	3			3	3	2	8	2	5	7		4	2
CHI3L1	SQTGFVVLV	Chitinase-3-like protein 1	P36222	1	0	1	Cancer										1
AQP7;AQP7P3;LOC100509620	HPAPPLHESM;SVIAKIQEI	Aquaporin-7;Aquaporin-7 (Fragment);Putative aquaporin-7-like protein 3;Uncharacterized protein	A0A075B734;A0A096LNK2;A0A096LNU3;A0A096LNV7;A0A096LP23;A0A096LP64;A6NL99;B7Z4U2;O14520;Q5T5M0;Q5T5M1	2	0	3	Cancer										1				1	1
TLL2	TPEVITSQS	Tolloid-like protein 2	Q9Y6L7	1	0	1	Cancer										1
TAF6	HELSVEQQLY;TTSDIDYAL;TTTNNIQSR	Transcription initiation factor TFIID subunit 6;Transcription initiation factor TFIID subunit 6 (Fragment)	C9J088;C9J7C4;C9JFL8;C9JHQ8;C9JIS2;C9JTY6;E5RHA1;E5RKA5;F8WEJ7;J3KR72;P49848	3	1	2	Both		1						1		1
RAC1;RAC2;RAC3	ASFENVRAK;ASYENVRAK;KEIDSVKYL;MVDGKPVNL;NAFPGEYIPTVFDNYSANV;TVFDEAIRAV;TYPQGLALAKEI;VFDEAIRAV;VFDEAIRAVL	Ras-related C3 botulinum toxin substrate 1;Ras-related C3 botulinum toxin substrate 2;Ras-related C3 botulinum toxin substrate 2 (Fragment);Ras-related C3 botulinum toxin substrate 2 (Rho family, small GTP binding protein Rac2), isoform CRA_c;Ras-related C3 botulinum toxin substrate 3;Ras-related C3 botulinum toxin substrate 3 (Fragment)	B1AH77;B1AH78;B1AH80;J3KSC4;J3QLK0;P15153;P60763;P63000	9	1	6	Both	+					3	1	3		1	3			2	4
HBA1;HBA2;HBZ	AAHLPAEFTPAVHASLDKF;AAWGKVGAHAGE;AAWGKVGAHAGEYGAEALE;ADALTNAVAHVD;ADALTNAVAHVDDMPN;ADKTNVKAAWGKVG;ADKTNVKAAWGKVGA;AGEYGAEALE;AGEYGAEALER;AHAGEYGAE;AHAGEYGAEA;AHAGEYGAEAL;AHAGEYGAEALE;AHAGEYGAEALER;AHAGEYGAEALERMF;AHAGEYGAEALERMFL;AHAGEYGAEALERMFLS;AHAGEYGAEALERMFLSFPTT;AHAGEYGAEALERMFLSFPTTK;AHAGEYGAEALERMFLSFPTTKTY;AHLPAEFTP;AHLPAEFTPAV;AHLPAEFTPAVHASLDKFLAS;AHLPAEFTPAVHASLDKFLASVS;AHVDDMPNAL;AH…	HCG1745306, isoform CRA_a;Hemoglobin subunit alpha;Hemoglobin subunit alpha (Fragment);Hemoglobin subunit zeta;Hemoglobin subunit zeta (Fragment)	A0A2R8Y7C0;A0A494C057;CON__P01966;G3V1N2;P02008;P69905	189	4	8	Both		83	95		4	32	35	77	46	77	27	11		14	8
ZNF578	VIHTGMLQRH	Zinc finger protein 578;Zinc finger protein 578 (Fragment)	M0QZV4;Q96N58	1	0	1	Cancer										1
GPX2	VLIENVASL	Glutathione peroxidase 2;Glutathione peroxidase	G3V4J6;G3V323;A0A087WTS0;P18283	1	0	1	Cancer										1
VEPH1	VSYPNIIHI	Ventricular zone-expressed PH domain-containing protein homolog 1	Q14D04	1	0	2	Cancer										1		1
LSP1	EGFGDWSQR;ETAGRTPKLAR;HERDRQLQA;IELPSMAVA;KEDSDEVHL;KLIDRTESL;QEDRPGLHA;QEDRPGLHAY;SDPGAEEREELLGPTAQ;SLKPSEAPELDEDEGF;SLWEQKGGSK;VLVEGGPAP;WSVEDEEEAVHEQ;YEKEDSDEVHL	Lymphocyte-specific protein 1;Lymphocyte-specific protein 1 (Fragment)	C9J9B9;C9JDV1;C9JKF7;C9JNQ1;C9JU59;E7EMG9;E9PBD8;P33241	14	3	5	Both		2	2			1	4	4	4	2					2
SLC16A7	YAFPKAVTV;YAFPKAVTVF	Monocarboxylate transporter 2;Monocarboxylate transporter 2 (Fragment)	F8VQS4;F8VVU7;F8VXG4;F8VYZ2;F8W0N3;F8W0U4;F8W1M4;O60669	2	0	4	Cancer							1			1	1	1
HAUS3	YEIELRKHR	HAUS augmin-like complex subunit 3	Q68CZ6	1	0	1	Cancer										1
EZR;MSN;RDX	AEYTAKIAL;AIQPNTTGK;APPPPPPPVYEPVSYHVQE;EQIQRALQL;ESLQDEGAEPTGYSA;ETAVLLGSY;EYTAKIALL;FPEDVSEEL;FPWSEIRNI;GSYAVQAKF;HVQESLQDEGAEPTGY;KENPLQFKF;KTIGLREVW;LEADRMAAL;QRIDEFEAL;QRVLEQHKL;QRVMDQHKL;RAKEELERQ;TAMSTPHVA;VYEPVSYHV;YEHDDKLTP;YEKDDKLTP;YEQNDRLTP;YPEDVAEEL;YPEDVAEELI	Ezrin;Moesin;Moesin (Fragment);Radixin;Radixin (Fragment)	A0A2R8Y5P0;A0A2R8Y5S7;A0A2R8Y7M3;E7EQR4;E9PNP4;E9PNV3;E9PQ82;P15311;P26038;P35241;V9GZ54	25	5	9	Both		3	4	1	1	2	5	2	2	1	1	4	1	7	1
CCDC125	ALQLTQMDKMHKKATKWMNW	Coiled-coil domain-containing protein 125	Q86Z20	1	1	0	Benign				1
DIO2	ALYDSVILL	Type II iodothyronine deiodinase;Iodothyronine deiodinase (Fragment);Iodothyronine deiodinase	G3V3A8;J3KQY5;A0A0A0MTQ2;Q92813	1	1	0	Benign				1
PKN3	APYPGFLSV	Serine/threonine-protein kinase N3	Q6P5Z2	1	1	0	Benign				1
DNAJB9	DAEAKFREI;REIAEAYETL	DnaJ homolog subfamily B member 9	Q9UBS3	2	1	1	Both				1					1
NCBP2	DAENAMRYI	Nuclear cap-binding protein subunit 2;Nuclear cap-binding protein subunit 2 (Fragment)	C9JQX9;B3KSB0;P52298	1	2	0	Benign				1	1
PAWR	DAITQQNTI	PRKC apoptosis WT1 regulator protein;PRKC apoptosis WT1 regulator protein (Fragment)	H0YI16;Q96IZ0	1	1	0	Benign				1
CD81	DANNAKAVV;RHDPQTTNL;RHDPQTTNLL	CD81 antigen;CD81 antigen (Fragment);Tetraspanin;Tetraspanin (Fragment)	A6NMH8;E9PIF1;E9PJK1;E9PM31;E9PQV4;E9PRJ8;H0YDJ9;H0YDL9;H0YEE2;P60033	3	2	2	Both		1		1			2					1
MED15	DANPFLQSV	Mediator of RNA polymerase II transcription subunit 15	G3V1P5;Q96RN5	1	1	0	Benign				1
F13A1;TGM2	AEDDLPTVEL;AHDQNSNLL;DAPFVFAEV;EAVLIQAGEY;EFLNVTSVHLF;ENNKLIVRR;EVNDIKTRSW;EVNSDLIYI;FESDKLKAV;GEVNDIKTRSW;GSVDILRRW;IIKVRGTQV;ILLDVNPKF;IPARIVTNY;IPTRVVTNY;IPVPIVSEL;KFIKNIPWNF;KMSETSRTAF;KVDHHTDKY;MTRPDLPVGF;NPETDTYIL;NPLKETLRNVW;QEFLNVTSV;REIRPNSTV;SAHDNDANL;SSDSLRHVY;TAFGGRRAV;THVVENVDATHI;TRANHLNKL;VEIPDPVEA;VENVDATHI;VFAGVFNTF;YLLAERDLYL	Coagulation factor XIII A chain;Coagulation factor XIII A chain (Fragment);Protein-glutamine gamma-glutamyltransferase 2;Protein-glutamine gamma-glutamyltransferase 2 (Fragment)	A2A299;A6PVK5;H0Y4W5;H0Y796;P00488;P21980;Q9NQP5	33	3	9	Both		2		1	2		3	3	3	2	2	12	2	11	5
OAZ1	DAPHPPLKI;NPGPGPRW	Ornithine decarboxylase antizyme 1;Ornithine decarboxylase antizyme 1 (Fragment)	J3QQY4;K7ERW1;P54368	2	1	1	Both				1				1
NDFIP1	DAPPPYSSI	NEDD4 family-interacting protein 1	Q9BT67	1	1	0	Benign				1
MTM1;MTMR2	AYHNAELFF;DARPSVNAV;DAYHNAELFF;EYIKRLEEL;KQFPTAFEF;SHSLENESI;VPLGVISRI;VYITNYRLYL;YAFPLAHSL	Myotubularin;Myotubularin (Fragment);Myotubularin-related protein 2;Myotubularin-related protein 2 (Fragment)	C9J2A2;C9JEX3;Q13496;Q13614	9	3	6	Both				3	1	1	1			1	1	4	1	1
ACOT1;ACOT2	DAWKQLQTF;ETLPPVGVNR	Acyl-coenzyme A thioesterase 1;Acyl-coenzyme A thioesterase 2, mitochondrial	A0A087WT95;A0A087X0W7;G3V4F2;P49753;Q86TX2	2	1	1	Both				1				1
ACTN4;SPTB;SPTBN4	DGLAFNALI;SFHRVHTAF;TSATEFENVGNQPP;TSATEFENVGNQPPYSRI	Alpha-actinin-4;Spectrin beta chain;Spectrin beta chain, erythrocytic;Spectrin beta chain, erythrocytic (Fragment);Spectrin beta chain, non-erythrocytic 4	C9JY79;H0YJE6;M0QZQ3;O43707;P11277;Q9H254	4	2	1	Both			2	1								1
NUP35	AQYGNILKH;DGRIFGESI;QVISDRQTPK	Nucleoporin NUP35	Q8NFH5	3	1	1	Both				1				2
IGKV1-37;IGKV1-9	DIQLTQSPS;DIQLTQSPSF;DIQLTQSPSFL;DIQLTQSPSFLS;DIQLTQSPSFLSA;DIQLTQSPSFLSAS;DIQLTQSPSFLSASVG;DIQLTQSPSFLSASVGD;DIQLTQSPSFLSASVGDR;DIQLTQSPSSL;DIQLTQSPSSLSASVG;DIQLTQSPSSLSASVGD	Immunoglobulin kappa variable 1-37 (non-functional) (Fragment);Immunoglobulin kappa variable 1-9	A0A075B6S9;A0A0C4DH69	12	2	5	Both				9		4		2			5	4	1	4
1;IGKV1-16;IGKV1-17;IGKV1-27;IGKV1-33;IGKV1-39;IGKV1D-16;IGKV1D-33;IGKV1D-39	DIQMTQSPSSL;DIQMTQSPSSLS;DIQMTQSPSSLSA;DIQMTQSPSSLSAS;DIQMTQSPSSLSASV;DIQMTQSPSSLSASVG;DIQMTQSPSSLSASVGD;DIQMTQSPSSLSASVGDR	Immunoglobulin kappa variable 1-16;Immunoglobulin kappa variable 1-17;Immunoglobulin kappa variable 1-27;Immunoglobulin kappa variable 1-33;Immunoglobulin kappa variable 1-39;Immunoglobulin kappa variable 1D-16;Immunoglobulin kappa variable 1D-33;Immunoglobulin kappa variable 1D-39;Uncharacterized protein (Fragment)	A0A075B6S5;A0A0G2JRQ6;A0A2Q2TTZ9;P01593;P01594;P01597;P01599;P01601;P04430;P04432	8	5	9	Both		7	7	8	7	7	7	6	7	6	7	7	7	7	5
IGKV1OR2-108	DIQVTQSPSSLSASVGD	Immunoglobulin kappa variable 1/OR2-108 (non-functional) (Fragment)	A0A075B7D4	1	1	0	Benign				1
IGKV2-24;IGKV2D-24	DIVMTQTPLSSPVTL;DIVMTQTPLSSPVTLG;DIVMTQTPLSSPVTLGQPA	Immunoglobulin kappa variable 2-24;Immunoglobulin kappa variable 2D-24 (non-functional) (Fragment)	A0A075B6R9;A0A0C4DH68	3	4	7	Both			1	3	1	1	2	2	1		3	2	1	2
BTG1;BTG2	DPYEVSYRI;GEIAAAVSFI;QELLAEHY;RTKGLTSER;TLWVDPYEV;VDPYEVSY;WVDPYEVSY	Protein BTG1;Protein BTG1 (Fragment);Protein BTG2	F8W0U7;P62324;P78543	7	4	5	Both			1	2	2	2	2		1		1		1	1
SMIM15	AVLSWKLAK;DPYGFLTTV	Small integral membrane protein 15	Q7Z3B0	2	1	3	Both				1				1	1						1
EPPK1;PLEC	AAIGEATRL;AEAEKVLAL;AEAEPEHSF;AEDLFEARI;AEEAARLSV;AEEKAHAF;AEGTAQQRL;AEMEKHKKF;AEQEAARRA;AEQELEKQRQL;AEQESARQL;AEVELASRV;AEVERARQV;AEVVETTQV;ATATVSVGK;ATYGELQQR;AVQGPLGSPPK;DEATALQL;DEKEQLNEY;DPYSGSTI;DPYTGQQI;DTETLEKV;DTETLEKVSIT;DVAEVDTVR;DVAEVDTVRR;EEVAQQKSL;ELEDSTLRY;ELQQLEQQR;EPSPAAPTL;EVGERLQQR;EVTKNLQKF;EVVETTQVY;GEAEAARRA;GEIQEKLLSA;GLIDHQTYL;IEIIEKTEI;IRPGTAFEL;ITGQRLWVD;IYLEKLKTI;KEAQAV…	Epiplakin;Plectin;Plectin (Fragment)	A0A075B730;E9PIA2;E9PKG0;E9PMV1;H0YDN1;P58107;Q15149	99	5	9	Both		6	3	4	6	9	13	16	14	2	10	19	5	26	11
DSG1	DTGRPSTTV;NVIEGPVFRPGSKTY;VATDLDTGRPSTT;VVTGNMGSNDKVGDF	Desmoglein-1	Q02413	4	5	7	Both		2	1	2	1	1		2	1		1	1	1	1	1
IGKV2-30;IGKV2D-30	DVVMTQSPLSL;DVVMTQSPLSLPVTL;DVVMTQSPLSLPVTLG;DVVMTQSPLSLPVTLGQ;DVVMTQSPLSLPVTLGQPA	Immunoglobulin kappa variable 2-30;Immunoglobulin kappa variable 2D-30	A0A075B6S6;P06310	5	5	6	Both		1	1	5	1	3	1	3			4	3	3	2
UMPS	EAYLSRLGV;EHSEFVVGF;KQYEGGIFK;THVDILNDFTL	Uridine 5'-monophosphate synthase	E9PFD2;P11172	4	2	3	Both			1	1			2	1				1
IGKV3-11;IGKV3D-11;IGKV3D-20	EIVLTQSPA;EIVLTQSPAT;EIVLTQSPATL;EIVLTQSPATLS;EIVLTQSPATLSL;EIVLTQSPATLSLS;EIVLTQSPATLSLSP;EIVLTQSPATLSLSPG;EIVLTQSPATLSLSPGE;EIVLTQSPATLSLSPGER;EIVLTQSPATLSLSPGERA;EIVLTQSPATLSLSPGERATL	Immunoglobulin kappa variable 3-11;Immunoglobulin kappa variable 3D-11;Immunoglobulin kappa variable 3D-20	A0A0A0MRZ8;A0A0C4DH25;P04433	12	5	9	Both		8	10	12	6	8	7	8	4	4	9	6	7	9	3
IGHV3-43;IGHV3-43D	EVQLVESGGVVVQPG;EVQLVESGGVVVQPGG	Immunoglobulin heavy variable 3-43;Immunoglobulin heavy variable 3-43D	A0A0B4J1X8;P0DP04	2	2	2	Both		1		2				1			1
ATP5MC1;ATP5MC2;ATP5MC3	EFQTSVVSR;GAATVGVAGSGAGIGTVF;REFQTSVV;SPVNSSKQPSY;TSLVSSRSF	ATP synthase F(0) complex subunit C1, mitochondrial;ATP synthase F(0) complex subunit C1, mitochondrial (Fragment);ATP synthase F(0) complex subunit C2, mitochondrial;ATP synthase F(0) complex subunit C3, mitochondrial	D6R9H7;E7EPU7;E7EQ97;I3L0Y5;P05496;P48201;Q06055	5	2	4	Both				1	1			1				1		1	1
CARMIL3	GFDSDLLTL	Capping protein, Arp2/3 and myosin-I linker protein 3	Q8ND23	1	1	0	Benign				1
ALDH18A1	GLEGLLTTK	Delta-1-pyrroline-5-carboxylate synthase	P54886	1	1	0	Benign				1
SH3RF2	GTQTVFPSK	E3 ubiquitin-protein ligase SH3RF2	Q8TEC5	1	1	1	Both				1											1
TBC1D30	GVGTILSNVL	TBC1 domain family member 30 (Fragment)	F5H0E8	1	1	0	Benign				1
ATP5MPL	AADKRSKAL;GLMGFIVYK;ILASQSAGINK	ATP synthase subunit ATP5MPL, mitochondrial	A0A0A0MTQ5;G3V556;P56378	3	1	3	Both				1				1	1						1
IFI44L	IPISNILMV;VLDINSIDNLY	Interferon-induced protein 44-like	Q53G44	2	2	1	Both				1	1		1
IGF2	IPMGKSMLV;PAHGGAPPEMASN	Insulin-like growth factor II	P01344	2	2	1	Both		1		1								1
CD46	IPPLATHTI;LLYSFSDA;SEVEVFEY	Membrane cofactor protein	P15529	3	1	1	Both				1				2
LYRM1	IPYPRPIHL	LYR motif-containing protein 1	O43325	1	1	0	Benign				1
IL6ST	KILDYEVTL	Interleukin-6 receptor subunit beta	A0A494BZU0;P40189	1	1	0	Benign				1
DCHS2	LDSLQLDVSELSPPG;TYVEYSIIS	Protocadherin-23	A0A096LNH0;A0A0A0MRC0;Q6V1P9	2	1	1	Both				1					1
NLRP13	LHELDLSN	NACHT, LRR and PYD domains-containing protein 13	A0A0C4DGQ4;Q86W25	1	1	0	Benign				1
UNC79	LLLGSLTHN	Protein unc-79 homolog	G3V2U4;Q9P2D8	1	1	0	Benign				1
EXOC5	DENNVLIQY;EVAAVLLHF;LPFDRFSEV;YEHLQQYSY	Exocyst complex component 5	A0A0A0MSI8;F8W9B8;O00471	4	1	3	Both				1			1	2				1
IFI27	AAVPMVLSA;GIASSSIAAK;IAAVIARFY;LPLARIATV;SAIAAVIAR;SSAVTSVAK;TSSAVTSVAK;VASGSAVVL	Interferon alpha-inducible protein 27, mitochondrial;Interferon alpha-inducible protein 27, mitochondrial (Fragment)	A0A087WUJ8;A0A087WV79;A0A087WZR1;A0A087X174;G3V4U3;P40305	8	2	7	Both		3		1			2	1	5	1		2		1	2
C5orf22	HHISTEQEI;LPNPTLVTI	UPF0489 protein C5orf22	Q49AR2	2	2	2	Both		1		1			1					1
MED7	LPPPPMQYI	Mediator of RNA polymerase II transcription subunit 7;Mediator of RNA polymerase II transcription subunit 7 (Fragment)	E5RIE8;O43513	1	1	0	Benign				1
MLXIP	LPTTALPTV;THDAPATTF	MLX-interacting protein	Q9HAP2	2	2	2	Both		1		1			1					1
COL12A1;COL14A1	ATDPDDTHAY;ESVPVIGQL;EVTTPPNQR;KPVDPIVGY;LPYKGGNTL;RTEFNLNQY;VYNPTPNSL	COL14A1 protein;Collagen alpha-1(XII) chain;Collagen alpha-1(XII) chain (Fragment);Collagen alpha-1(XIV) chain;Collagen alpha-1(XIV) chain (Fragment)	A0A087X0A8;D6RGG3;H0Y4P7;J3QT83;Q05707;Q4G0W3;Q99715	7	2	6	Both				1	1		2	1				1	1	3	1
CA1	ESISVSSEQLAQFR;HDTSLKPISVSYNPATAK;LYPIANGNNQSPVDIK;NQSPVDIKTS;YNPATAKEIINVGHSF	Carbonic anhydrase 1;Carbonic anhydrase 1 (Fragment)	E5RFE7;E5RFL2;E5RG43;E5RG81;E5RGU8;E5RH81;E5RHP7;E5RIF9;E5RII2;E5RJI8;P00915	5	2	2	Both		1		3				1		1
A2ML1	MCFDNQVSL	Alpha-2-macroglobulin-like protein 1;Alpha-2-macroglobulin-like protein 1 (Fragment)	F5GXP1;H0YGG5;A8K2U0	1	1	0	Benign				1
PROX1	MPFPGATII;STAEGLSLSL	Prospero homeobox protein 1;Prospero homeobox protein 1 (Fragment)	C9JU29;Q92786;U3KPY6	2	1	2	Both				1					1						1
MEPCE	PPLKDESGGG	7SK snRNA methylphosphate capping enzyme	Q7L2J0	1	1	3	Both				1							1	1		1
SPATA31C1	QIRDQQPLKS	Putative spermatogenesis-associated protein 31C1	P0DKV0	1	1	0	Benign				1
IGHV3-33;IGHV3-30-5;IGHV3-30-3;IGHV3-30	QVQLVESGGGVVQPGR	Immunoglobulin heavy variable 3-33;Immunoglobulin heavy variable 3-30-5;Immunoglobulin heavy variable 3-30-3;Immunoglobulin heavy variable 3-30	P0DP03;P0DP02;P01772;P01768	1	1	2	Both				1									1	1
DAD1	FASTILHLV;KLLDAYLLY;RIQINPQNK;SVVSVISRF	Dolichyl-diphosphooligosaccharide--protein glycosyltransferase subunit DAD1	A0A0B4J239;F5GXX5;F5H895;P61803	4	2	4	Both		1		1			2	1				2			1
SZRD1	RRQTAGSGP	SUZ domain-containing protein 1	F8WDF4	1	1	1	Both				1								1
DDX17;DDX5	AEAPPPSVV;DYIHRIGRTAR;EANQAINPK;FPANVMDVI;FPQYVMDVL;FTPNNIKQV;GTYGASSTTSTGR;IGYPMPTGY;IHINIGALEL;KENKTIIFV;QAYAYPATA;QPERDWVL;QVSDLISVL;RAGPLSGKKF;REANQAINP;REANQAINPKL;RTAQEVETY;RTGNPTGTY;SANHNILQI;SSQQFSGIGR;TAAAPMIGY;VSAGIQTSF;VSDLISVL;WPVALSGLDM;YAYPATAAA;YLLPAIVHI;YPNSSEDYIHRI	Probable ATP-dependent RNA helicase DDX17;Probable ATP-dependent RNA helicase DDX17 (Fragment);Probable ATP-dependent RNA helicase DDX5;Probable ATP-dependent RNA helicase DDX5 (Fragment)	A0A0U1RQJ0;A0A1W2PQ51;A0A1X7SBZ2;J3KRX8;J3KRZ1;J3KTA4;J3KTQ4;J3QKN9;J3QLG9;J3QR02;J3QR62;J3QRN5;J3QRQ7;J3QS97;J3QSF1;P17844;Q92841;X6RLV5	27	5	8	Both		1	2	3	2	5	5	6	3	1		3	2	7	5
C1orf232	SGESEEDLAEE	Uncharacterized protein C1orf232	A0A0U1RQR0;A0A0U1RR37	1	1	1	Both				1											1
IGLV3-1;IGLV3-10;IGLV3-16;IGLV3-25	SYELTQPPSVSVS;SYELTQPPSVSVSPG;SYELTQPPSVSVSPGQ;SYELTQPPSVSVSPGQT;SYELTQPPSVSVSPGQTA;SYELTQPPSVSVSPGQTAR;YELTQPPSVSVS;YELTQPPSVSVSPG;YELTQPPSVSVSPGQ;YELTQPPSVSVSPGQT;YELTQPPSVSVSPGQTA	Immunoglobulin lambda variable 3-1;Immunoglobulin lambda variable 3-10;Immunoglobulin lambda variable 3-16;Immunoglobulin lambda variable 3-25	A0A075B6K0;A0A075B6K4;P01715;P01717	11	5	9	Both		4	5	6	8	6	3	4	7	4	7	5	5	9	2
LCP2	KVYNIQIRY;TAKLPAPSI	Lymphocyte cytosolic protein 2	A0A0D9SGG1;E7ESF6;Q13094	2	1	4	Both				1				1					1	1	1
PNKP	VADPETRTV	Bifunctional polynucleotide phosphatase/kinase;Bifunctional polynucleotide phosphatase/kinase (Fragment)	A0A1B0GVJ3;A0A1B0GU66;A0A0D9SEV0;M0R000;M0QYI1;M0R3C8;A0A0D9SFL2;M0QYH2;Q96T60	1	1	0	Benign				1
HINT1	ALLSMTFPLK;LLSMTFPLK;SLLGHLMIV;TIFGKIIRK;VARPGGDTI	Histidine triad nucleotide-binding protein 1	D6RC06;D6RD60;D6RE99;D6REP8;P49773	5	2	1	Both			1	1				3
MST1R	VEQIVSALLGDHYVQLP	Macrophage-stimulating protein receptor;MST1R variant RON30	H2E272;A0A087WZQ8;Q04912	1	1	0	Benign				1
CFAP99	VEQVIEGQKNAK;VEQVIEGQKNAKA	Cilia- and flagella-associated protein 99	A0A087WWY8;A0A0U1RQC7;D6REC4	2	2	0	Benign		1		1
FASTK	VPIFPQPLI	Fas-activated serine/threonine kinase	G3V1R6;Q14296	1	1	0	Benign				1
IER3IP1	VPLIIVNSI	Immediate early response 3-interacting protein 1	Q9Y5U9	1	1	0	Benign				1
ENOX1	VPPPPPTEV	Ecto-NOX disulfide-thiol exchanger 1	Q8TC92	1	1	0	Benign				1
UCKL1	VPRGSGNTV	Uridine-cytidine kinase-like 1	Q9NWZ5	1	1	0	Benign				1
DOLK	VPYAGVLAV	Dolichol kinase	Q9UPQ8	1	1	0	Benign				1
NMI	GVADKILKK;VPYEIQKGQALI	N-myc-interactor	Q13287	2	1	3	Both				1				1	1						1
CD36	ILMPVGDLLIQK;VPYPVTTTV	Platelet glycoprotein 4;Platelet glycoprotein 4 (Fragment)	E7ERZ9;E7EU05;E7EVU1;E7EWI4;E7EX47;E9PC45;E9PJX8;E9PLT1;P16671	2	1	0	Benign				2
LEMD2	ITDTTRDVY;WEQDMERYP;YPYVGILHV	LEM domain-containing protein 2;LEM domain-containing protein 2 (Fragment)	D6RBV0;H0Y8H8;H0Y9B7;Q8NC56	3	2	3	Both				1	1		2						1	1
NRGN	AAAKIQASF	Neurogranin	Q92686	1	1	0	Benign					1
CYHR1	AAALGEAAG;AEAAEAAAA	Cysteine and histidine-rich protein 1	E9PJD7	2	1	2	Both					1		1					1
IGKV1-13;IGKV1D-13	AIQLTQSPS;AIQLTQSPSSL;AIQLTQSPSSLS;AIQLTQSPSSLSA	Immunoglobulin kappa variable 1-13;Immunoglobulin kappa variable 1D-13	A0A0B4J2D9;P0DP09	4	1	0	Benign					4
RPL22L1	ASDKETYELRY;VVSEKQFSK	60S ribosomal protein L22-like 1;60S ribosomal protein L22-like 1 (Fragment)	C9JYQ9;H0Y8C2;Q6P5R6	2	2	1	Both				1	1			1
SRFBP1	ASEDNHSENTLY;EHGPKAVTI	Serum response factor-binding protein 1	Q8NEF9	2	1	2	Both					1		1					1
SLC7A8	ASNAVAVTF	Large neutral amino acids transporter small subunit 2	A0A087WWF3;Q9UHI5	1	1	0	Benign					1
FAF1	AAFQEAFYV;ASNKLQIVF;DESVLTNVF;FTAEFSSRY;HHDESVLTNVF	FAS-associated factor 1	B1ANM7;B3KT28;Q9UNN5	5	2	4	Both		1			1		3	1			1	1
USP3	ASTVVTAIF;VEHQAKAGSDKL	Ubiquitin carboxyl-terminal hydrolase 3;Ubiquitin carboxyl-terminal hydrolase 3 (Fragment);Ubiquitinyl hydrolase 1	H0YKU8;H0YLB7;H0YM72;H0YMI4;Q6JHV3;Q9Y6I4	2	1	1	Both					1				1
PLEKHF2	ATATEKSEW	Pleckstrin homology domain-containing family F member 2	Q9H8W4	1	1	1	Both					1									1
OARD1	ATDIKITVY	ADP-ribose glycohydrolase OARD1	C9JXC3;Q9Y530	1	1	0	Benign					1
4;ASL	ATDLAYYLV;FVGAVDPIM;VATGVISTL	Argininosuccinate lyase;Uncharacterized protein (Fragment)	H7C0S8;P04424	3	2	3	Both		1			1				1			1		1
IFT88	ATNLSALYY	Intraflagellar transport protein 88 homolog;Intraflagellar transport protein 88 homolog (Fragment)	F5H6C2;Q13099	1	1	0	Benign					1
IFI16;PYHIN1	ATQTQFFHVK;ATVATQTQF;EVINDYHFR;IADLMEEKF;IESIPVKGI;SEMHSFIQI;TTLPESHLK	Gamma-interferon-inducible protein 16;Gamma-interferon-inducible protein 16 (Fragment);Pyrin and HIN domain-containing protein 1;Pyrin and HIN domain-containing protein 1 (Fragment)	H3BM18;H3BR88;H3BVE6;Q16666;Q6K0P9;X6RHM1;X6RHR0	7	2	5	Both					1	2	1	2	2			2			1
LOC112267897;LOC647264	CGYGCGYGTGY	Uncharacterized protein	A0A3B3IRS2;A0A3B3IRQ3	1	1	0	Benign					1
4;TBCEL	DSERFFIRY;KIYVESKTK	Tubulin-specific chaperone cofactor E-like protein;Tubulin-specific chaperone cofactor E-like protein (Fragment);Uncharacterized protein (Fragment)	A0A2R8YFB7;E9PP54;Q5QJ74	2	1	2	Both					1			1							1
ARHGAP12	ELDERGHTLY;GLDIDGIYRV;SEWELPKY	ARHGAP12 protein;Rho GTPase-activating protein 12;Rho GTPase-activating protein 12 (Fragment)	H0Y5D8;Q1RLN5;Q8IWW6	3	1	2	Both					1			1	1
MRPL2	ESEPGRGAQY;RTKYTITPVK	39S ribosomal protein L2, mitochondrial	C9IY40;C9JZG7;C9JZW2;Q5T653	2	1	3	Both					1								1	1	1
ST3GAL5	DEVSLAGFGY;ETAFDILQY	Lactosylceramide alpha-2,3-sialyltransferase;Lactosylceramide alpha-2,3-sialyltransferase (Fragment)	A0A0S2Z4Q7;A0A1W2PQR0;A0A1W2PR45;A0A1W2PRC6;A0A1X7SBT2;Q9UNP4	2	1	1	Both					1			1
TCEANC	ETDVVRAVY	Transcription elongation factor A N-terminal and central domain-containing protein	Q8N8B7	1	1	0	Benign					1
VPS18	ETEQAIHNY;FLQRKLASL;SEERVWEY;YTERAVFRY	Vacuolar protein sorting-associated protein 18 homolog	Q9P253	4	2	3	Both			1		1		1	1						1
KLHL22	EEVLIHGVSY;ETEVYEGALLY;EVYEGALLY	Kelch-like protein 22;Kelch-like protein 22 (Fragment)	C9J191;C9J2T1;C9J5F8;C9JHG1;C9JLE9;Q53GT1	3	2	4	Both		1			1		1	1			1	1
PHOSPHO1	EVILISDAN	Phosphoethanolamine/phosphocholine phosphatase;Phosphoethanolamine/phosphocholine phosphatase (Fragment)	D6RHH9;Q8TCT1	1	1	0	Benign					1
ZC3H12A;ZC3H12B	FIEERLLMY;SSTEIHSVL	Endoribonuclease ZC3H12A;Endoribonuclease ZC3H12A (Fragment);Probable ribonuclease ZC3H12B	A0A1W2PQC8;Q5D1E8;Q5HYM0;R4GN17	2	1	1	Both					1		1
HPS1	FLDANVKESY	Hermansky-Pudlak syndrome 1 protein;Hermansky-Pudlak syndrome 1 protein (Fragment)	Q5TAA8;Q92902	1	1	1	Both					1									1
CCRL2	FLDGTFSKY	C-C chemokine receptor-like 2	O00421	1	1	1	Both					1									1
DCAF12	FLDPRQPSY	DDB1- and CUL4-associated factor 12	Q5T6F0	1	1	0	Benign					1
PLA2G15	FLDPSKSSVGSY	Group XV phospholipase A2;Group XV phospholipase A2 (Fragment)	B4DJW4;H3BPT3;H3BMU8;Q8NCC3	1	1	0	Benign					1
TNFAIP8L2	FSDPGLLTALY	Tumor necrosis factor alpha-induced protein 8-like protein 2	Q6P589	1	1	0	Benign					1
TAF11	EEQLNRYEMY;FSEEQLNRY	Transcription initiation factor TFIID subunit 11	A0A3B3ITY8;Q15544	2	1	2	Both					1				1					1
LGALS9;LGALS9B;LGALS9C	FSGNDIAFHF;GLQDGLQITV;HAFPEGDAL;IAFHLNPRF;LEVGGDIQL;THAFPEGDAL;VPFHRVDTI	Galectin;Galectin (Fragment);Galectin-9;Galectin-9B;Galectin-9C	J3KS82;J3KSA0;J3KSY2;J3KT17;J3QKK6;J3QR96;J3QS92;J3QSH0;K7EPS0;O00182;Q3B8N2;Q6DKI2	7	1	4	Both					2			1	2			2		2
DGAT1	AAAPHTVSY;FSYRDVNSW	Diacylglycerol O-acyltransferase 1	A0A0A0MR74;O75907	2	2	2	Both		1			1		1					1
ZNF622	FTDGDAALEF	Zinc finger protein 622	Q969S3	1	1	0	Benign					1
RPS6KA1;RPS6KA2;RPS6KA3;RPS6KA6	DGYVVKETI;DVYDDGKHVY;DYLHSQGVVHR;EVKEDIGVGSY;EYLHAQGVVHR;EYLHSQGVVHR;FTEEDVKFY;FTITKTVEY;HPNIITLKDVY;HTIGKTVEY;ILLDEEGHIKL;KEISITHHV;KYVYVVTEL;QLSHQDLQL;RQDAPHLVK;STIDWNKLY	Non-specific serine/threonine protein kinase;Ribosomal protein S6 kinase;Ribosomal protein S6 kinase alpha-1;Ribosomal protein S6 kinase alpha-1 (Fragment);Ribosomal protein S6 kinase alpha-2;Ribosomal protein S6 kinase alpha-2 (Fragment);Ribosomal protein S6 kinase alpha-3;Ribosomal protein S6 kinase alpha-3 (Fragment);Ribosomal protein S6 kinase alpha-6	A0A2R8Y603;A0A2R8Y7S9;B1AXG1;B4DG22;B7Z3B5;B7ZB17;D6R910;D6RHW7;E9PAN7;E9PGT3;E9PMM7;F2Z2J1;P51812;Q15349;Q15418;Q5SVM6;Q5SVM7;Q9UK32	16	4	8	Both		2		1	1	1	5	4	1	1		8	1	1	1
FBXO33	FTAEMARVL;FTEPNRHFY;LPSELIVHI;RQYDKFLTH	F-box only protein 33	Q7Z6M2	4	1	5	Both					1		1	2				2		1	1
CDKL1	FTETSKLQY;YYTDYVATR	Cyclin-dependent kinase-like 1	Q00532	2	1	1	Both					1			1
CCDC71	AAVGFPTHL;GFQPTILRSGD	Coiled-coil domain-containing protein 71	Q8IV32	2	1	1	Both					1		1
HLA-A;HLA-B	AVVATVMCR;GKGGSYSQAASSDSAQGSDVSLTA;GSHSMRYFSTSVSRPG;GSHSMRYFSTSVSRPGR;GSHSMRYFTTSVSRPG;HEAEQLRAY;ISKTNTQTY;QSEDGSHTIQIMY;QTYRENLRI;SEAGSHTVQRMY;VMAPRTLVL;VVATVMCRR	HLA class I histocompatibility antigen, A-1 alpha chain;HLA class I histocompatibility antigen, A-11 alpha chain;HLA class I histocompatibility antigen, A-2 alpha chain;HLA class I histocompatibility antigen, A-23 alpha chain;HLA class I histocompatibility antigen, A-24 alpha chain;HLA class I histocompatibility antigen, A-25 alpha chain;HLA class I histocompatibility antigen, A-26 alpha chain;HL…	A0A0G2JI36;A0A0G2JIF2;A0A0G2JL56;A0A0G2JPD3;A0A140T8W8;A0A140T8Y4;A0A140T913;A0A140T933;A0A140T941;A0A140T953;A0A140T955;A0A140T997;A0A140T9G0;A0A140T9I0;A0A140T9S9;A0A140T9X5;A0A140T9Y5;A0A140T9Z6;A0A140TA02;A0A140TA11;A0A140TA13;A0A140TA14;A0A1W2PNR7;A0A1W2PPF8;A0A1W2PPQ2;A0A1W2PQD0;A0A1W2PQS8;A0A1W2PQZ3;A0A1W2PR61;A0A1W2PRT9;A0A1W2PS24;A0A1W2PSE7;B0UXQ0;P01891;P01892;P04439;P05534;P10316;P1031…	12	2	8	Both					2	1	1	2	1		1	2	2	4	3
AGTR1	GLTKNILGF	Type-1 angiotensin II receptor;Angiotensin II receptor, type 1, isoform CRA_a;Angiotensin II receptor, type 1, isoform CRA_c	D3DNG8;A0A0A0MSE3;P30556	1	1	0	Benign					1
WDR20	GSNPVRVSF;KLNLVTKTK	WD repeat-containing protein 20	A0A088AWN2;H0YKE8;Q8TBZ3	2	1	1	Both					1			1
SELENOP	GSVTVVALL;VEEAIKIAY	Selenoprotein P;Selenoprotein P (Fragment)	A0A182DWH7;A0A182DWH8;P49908;R4GMT5	2	1	1	Both					1			1
JMJD8	GTAPAYSF;YAFVRPVIL	JmjC domain-containing protein 8	A0A3B3IQ16;H3BMF2;H3BVG3;Q96S16	2	2	5	Both		1			1		1		1	1	1	1
CRIPT	GTVITPDTW;KLNENKALTSK	Cysteine-rich PDZ-binding protein	Q9P021	2	1	3	Both					1			1						1	1
GEMIN6	HAVQTVETM	Gem-associated protein 6	Q8WXD5	1	2	1	Both					1	1								1
ZNF354C;ZNF879	HLDSAQRALY;VPIERIPNM	Zinc finger protein 354C;Zinc finger protein 879;Zinc finger protein 879 (Fragment)	B4DU55;E5RI37;E5RJY9;Q86Y25	2	2	0	Benign				1	1
NAT1	HSDLLEDSKY	Arylamine N-acetyltransferase 1	F5H5R8;P18440	1	1	0	Benign					1
RNMT	DDYEHAAKY;HSSTVAAHY;NEIYTVKF	mRNA cap guanine-N7 methyltransferase;mRNA cap guanine-N7 methyltransferase (Fragment)	K7EP06;K7ERH6;O43148	3	1	1	Both					1			2
KIRREL1	DYGQRFQQR;IAGATIGA	Kin of IRRE-like protein 1	B4DN67;Q5W0F9;Q5W0G0;Q96J84	2	1	1	Both					1			1
1;PA2G4	AEDLVVTKY;IAFPTSISV;IANVAHTF	Proliferation-associated protein 2G4;Proliferation-associated protein 2G4 (Fragment);Uncharacterized protein (Fragment)	F8VR77;F8VZ69;F8W0A3;H0YIN7;Q9UQ80	3	3	6	Both		1		1	1		1		1	1	2	1		1
CAPN15	IIDLAGDTVRY	Calpain-15;Calpain-15 (Fragment)	A0A1B0GVE3;O75808	1	1	0	Benign					1
4;NDUFA13	IIMKDVPDW;RENLEEEAIIM;SIMKWNRER;TEEALHASH	NADH dehydrogenase [ubiquinone] 1 alpha subcomplex subunit 13;NADH dehydrogenase [ubiquinone] 1 alpha subcomplex subunit 13 (Fragment);Uncharacterized protein	B4DEZ3;E7ENQ6;K7EJE1;Q9P0J0;U3KQP3	4	1	4	Both					1			2	1					1	1
OAT	IEIINKTIL;IINKTILSF	Ornithine aminotransferase, mitochondrial	P04181	2	1	1	Both					1				1
3;TM9SF1	DEFLGLTHTY;IINSMVLVF	Transmembrane 9 superfamily member;Transmembrane 9 superfamily member (Fragment);Transmembrane 9 superfamily member 1	E9PJC4;E9PJM1;E9PL78;E9PMQ9;E9PNW2;E9PQY7;E9PS99;E9PSI1;G3V1B9;O15321	2	1	1	Both					1			1
CTDNEP1	FTADVRSVL;ILDNSPGAY;KLDNSRSILK	CTD nuclear envelope phosphatase 1;CTD nuclear envelope phosphatase 1 (Fragment)	I3L1D9;I3L2R5;I3L3K5;I3L4B2;O95476	3	1	5	Both					1		1	1	1			1		1
GMEB2	IMDSGELDFY	Glucocorticoid modulatory element-binding protein 2;Glucocorticoid modulatory element binding protein 2, isoform CRA_a	Q5JTV1;Q9UKD1	1	1	0	Benign					1
CPT1C	IQLAWFLQL	Carnitine O-palmitoyltransferase 1, brain isoform;Carnitine O-palmitoyltransferase 1, brain isoform (Fragment)	M0R2V3;M0R2B9;M0R115;M0QZ13;Q8TCG5	1	1	0	Benign					1
4;TMEM35B	AEVFPLKVFGY;EVFPLKVFGY;ISAPVSERM;KTLSTFKESW;RMNALFVQF	Transmembrane protein 35B;Uncharacterized protein	A0A2R8YCV2;Q8NCS4	5	2	4	Both		1			2		1		1			1	1
COMMD9	EHFAALQSL;ISAVTVEL;RIRDQLSAVASK	COMM domain-containing protein 9	E9PJ95;Q9P000	3	2	3	Both			1		1			1				1			1
EIF4EBP2	ISDAAQLPHDY	Eukaryotic translation initiation factor 4E-binding protein 2	Q13542	1	1	1	Both					1									1
MRPL12;2	ISDLNELLK	39S ribosomal protein L12, mitochondrial;cDNA FLJ60124, highly similar to Mitochondrial dicarboxylate carrier	B4DLN1;P52815	1	1	0	Benign					1
PRKCQ	ISETTVELY	Protein kinase C theta type;Protein kinase C	A0A087X0I9;Q04759	1	1	0	Benign					1
ADAP2	ISIKDLNATF	Arf-GAP with dual PH domain-containing protein 2;Arf-GAP with dual PH domain-containing protein 2 (Fragment)	K7ENT1;J3QRD3;Q2V6Q1;Q9NPF8	1	1	1	Both					1									1
PRELP	ISNLLVLHL	Prolargin	P51888	1	1	0	Benign					1
ZBED5	ISNSNKITF;YLADIFTKL	Zinc finger BED domain-containing protein 5;Zinc finger BED domain-containing protein 5 (Fragment)	E9PM71;Q49AG3	2	2	1	Both			1		1		1
CCL14	ISVAAIPFF	C-C motif chemokine 14	A0A0B4J2G5;Q16627	1	1	0	Benign					1
ANAPC10;4	ISVRVGNNF	Anaphase-promoting complex subunit 10;Uncharacterized protein;Anaphase-promoting complex subunit 10 (Fragment)	D6R9Q5;A0A3B3ISY7;A0A286YEY6;D6RD74;D6RA92;Q9UM13	1	1	0	Benign					1
MRC1;MRC2	FPFKFENKW;IEQNEHSVI;ITEIHEQTY;IYKDYQYYF;LGAQLLSLA;SPSEGFTW;TEIHEQTYL;WSDGSPVSY;YEQAFLTSF	C-type mannose receptor 2;C-type mannose receptor 2 (Fragment);Macrophage mannose receptor 1	J3KRF1;P22897;Q9UBG0	9	2	6	Both					2	1		3	1	1		2	3	3
FABP4	EVGVGFATR;ITIKSESTF	Fatty acid-binding protein, adipocyte	P15090	2	1	3	Both					1			1					1	1
CTNNB1;JUP	AELATRAL;AELATRALP;AEMAQNAVRL;AQNAVRLHY;DAAHPTNVQR;DAELATRAL;DALGMDPMM;DPMMEHEM;EACGRQYTL;EALIHAILR;EASRHAIMR;EEDEACGRQY;EYQMSTTAR;FHSGGYGQDAL;GLLGTLVQL;HAIMRSPQM;HAVVNLINY;HPPSHWPLI;IENIQRVAA;IGLIRNLAL;ISEDKNPDY;ITTLHNLLL;KAAVMVHQL;KEAAEAIEA;LATRALPEL;LHYGLPVVV;LSSPVESVLFY;MSEDKPQDY;NTNDVETAR;QPYTDGVRM;REDITEPAI;RLAEPSQLLK;RLAEPSQMLK;SPVDSVLFY;SPVESVLFY;TTAPSLSGK;TVGLIRNL;TYTYEKLLW;VEALIHAI;VENI…	Catenin beta-1;Catenin beta-1 (Fragment);Junction plakoglobin;Junction plakoglobin (Fragment)	A0A2R8Y543;A0A2R8Y5A3;A0A2R8Y5C3;A0A2R8Y5Z1;A0A2R8Y6G0;A0A2R8Y750;A0A2R8Y7Z0;A0A2R8Y804;A0A2R8Y815;A0A2R8YCH5;A0A2R8YG06;B4DGU4;C9IZ65;C9J826;C9JK18;C9JKY1;C9JPI2;C9JTX4;E7EMJ5;E7EV28;E9PDF9;K7ERP3;P14923;P35222;sp|P35222_P14_CTNNB1|CTNB1_HUMANCateninbeta-1OS=HomosapiensOX=9606GN=CTNNB1PE=1SV=1	45	5	8	Both	+	5	4	2	5	1	6	9	5	1		5	3	6	8
ATP13A2	HRFPFSSAL;ITTTVAVLM	Cation-transporting ATPase 13A2;Cation-transporting ATPase 13A2 (Fragment)	H0Y953;Q9NQ11	2	2	1	Both			1		1										1
UHRF1BP1	IVNSITIKI	UHRF1-binding protein 1;Chromosome 6 open reading frame 107, isoform CRA_b	H7C1J4;Q6BDS2	1	1	0	Benign					1
HMGB1;HMGB1P1;HMGB2;HMGB3;SP100	DVAKKLGEM;EVPVNFAEF;KAAKLKEKY;KEKYEKDIAA;KTMSAKEKGKF;KTYIPPKGETK;KTYIPPKGETKK;SEHPGLSI;TAKKLGEMW;VAKKLGEMW	High mobility group protein B1;High mobility group protein B2;High mobility group protein B2 (Fragment);High mobility group protein B3;High mobility group protein B3 (Fragment);Nuclear autoantigen Sp-100;Putative high mobility group protein B1-like 1	B2RPK0;D6R9A6;E7EQU1;E7ES08;E9PES6;O15347;P09429;P23497;P26583;Q5T7C4	10	2	6	Both				1	1		1		1		1	2		4	2
STEAP4	KAFNTISAW	Metalloreductase STEAP4	C9JS50;Q687X5	1	1	0	Benign					1
STMN2;STMN3	KALEENNNF;QPHPNTVYQY	Stathmin;Stathmin (Fragment);Stathmin-2;Stathmin-3;Stathmin-3 (Fragment)	A0A0J9YW36;A0A0J9YXY4;E5RGX5;Q93045;Q9NZ72	2	1	2	Both					1									1	1
H2BFS;HIST1H2BB;HIST1H2BC;HIST1H2BD;HIST1H2BH;HIST1H2BJ;HIST1H2BK;HIST1H2BL;HIST1H2BM;HIST1H2BN;HIST1H2BO;HIST2H2BC;HIST2H2BD;HIST2H2BE;HIST2H2BF;HIST3H2BB	AVTKYTSAK;GTKAVTKYTSAK;KAMGIMNSF;PEPAKSAPAPK;PEPAKSAPAPKKGSKKAVTK	Histone H2B;Histone H2B type 1-B;Histone H2B type 1-C/E/F/G/I;Histone H2B type 1-D;Histone H2B type 1-H;Histone H2B type 1-J;Histone H2B type 1-K;Histone H2B type 1-L;Histone H2B type 1-M;Histone H2B type 1-N;Histone H2B type 1-O;Histone H2B type 2-E;Histone H2B type 2-F;Histone H2B type 3-B;Histone H2B type F-S;Putative histone H2B type 2-C;Putative histone H2B type 2-D	O60814;P06899;P23527;P33778;P57053;P58876;P62807;Q16778;Q5QNW6;Q6DN03;Q6DRA6;Q8N257;Q93079;Q99877;Q99879;Q99880;U3KQK0	5	5	6	Both		1	1	1	1	1	2	2	1			4		4	2
VRK1	KASNLLLNY;KEIEESKEP;LEYIHEHEY	Serine/threonine-protein kinase VRK1;Serine/threonine-protein kinase VRK1 (Fragment)	H0YJ50;H0YJF7;Q99986	3	1	2	Both					1		1	1
P3H1	EVMNQNLAYY;IPFVDPDSW;KAVAAAHTF	Prolyl 3-hydroxylase 1	Q32P28	3	2	4	Both		1			1		1	1				1		1
[truncated: 6,867 more rows]
